# Supplementary material for: Quantitative mapping of transcriptome and proteome dynamics during polarization of human iPSC-derived neurons
Source: bioRxiv preprint, doi:10.1101/2020.04.21.052498, version 1 (2020-04-21)
Supplement: Table 1 [file 052498_file07.xlsx]

## Sheet: Reads replicas
Gene_ID	day1_A1	day1_A2	day1_B1	day1_B2	day3_A1	day3_A2	day3_B1	day3_B2	day7_A1	day7_A2	day7_B1	day7_B2
A1BG__chr19	40	40	43	9	13	31	34	79	28	50	2	7
A1CF__chr10	1	2	1	1	1	2	0	6	1	0	0	0
A2M-AS1__chr12	3	0	4	0	2	1	1	10	1	2	0	0
A2MP1__chr12	0	0	0	0	0	0	0	0	0	0	1	1
A2M__chr12	5	5	30	3	3	2	14	44	6	4	6	7
A4GALT__chr22	0	0	1	0	0	0	0	1	0	0	0	0
AAAS__chr12	1036	588	850	110	296	311	610	1195	593	490	26	66
AACSP1__chr5	0	0	0	0	1	0	0	0	0	0	1	0
AACS__chr12	186	98	191	39	54	49	111	230	144	126	4	19
AADACL3__chr1	1	0	0	0	0	0	0	0	0	0	1	0
AADAC__chr3	0	0	0	0	0	0	0	1	0	0	0	0
AADAT__chr4	41	29	48	3	9	18	21	53	37	18	1	2
AAED1__chr9	5	3	3	1	3	2	9	3	3	1	0	0
AAGAB__chr15	414	214	310	49	159	183	275	466	261	216	25	15
AAK1__chr2	141	98	214	32	92	73	138	240	249	279	16	35
AAMDC__chr11	88	35	59	9	35	47	64	136	28	32	1	2
AAMP__chr2	190	103	174	23	85	72	146	340	139	146	10	14
AANAT__chr17	0	0	1	0	0	0	0	5	1	0	0	0
AAR2__chr20	494	312	411	51	152	166	247	454	309	294	13	50
AARD__chr8	3	3	2	0	1	0	0	3	1	2	0	0
AARS2__chr6	51	26	47	5	14	17	31	59	13	28	2	7
AARS__chr16	136	65	116	13	34	52	89	186	97	138	12	20
AASDHPPT__chr11	213	140	239	44	94	99	162	316	195	178	26	44
AASDH__chr4	30	10	25	3	5	9	14	20	22	19	3	3
AASS__chr7	59	33	86	9	15	14	44	63	14	24	7	4
AATF__chr17	99	64	65	10	57	66	66	130	67	59	8	7
AATK__chr17	7	4	10	0	1	5	3	5	5	6	0	0
ABAT__chr16	280	147	295	54	132	96	221	382	417	410	20	37
ABCA10__chr17	13	3	11	3	2	2	8	15	4	8	0	0
ABCA11P__chr4	4	3	1	2	1	1	5	3	1	1	0	0
ABCA12__chr2	2	1	2	0	0	0	0	2	4	4	0	1
ABCA13__chr7	2	1	0	0	0	1	1	1	4	0	1	0
ABCA17P__chr16	0	0	0	0	0	0	0	1	0	0	0	0
ABCA1__chr9	41	28	75	1	10	8	26	34	16	16	1	5
ABCA2__chr9	39	24	55	4	14	24	33	33	64	54	9	5
ABCA3__chr16	42	25	49	5	13	10	30	57	62	51	3	9
ABCA4__chr1	3	0	4	0	0	0	0	1	2	1	0	0
ABCA5__chr17	12	6	26	5	4	6	8	16	10	7	2	2
ABCA6__chr17	0	0	0	0	0	0	0	0	1	1	0	0
ABCA7__chr19	4	4	7	1	0	2	2	6	12	7	0	0
ABCA8__chr17	0	0	1	0	0	0	0	0	1	1	1	0
ABCA9__chr17	0	0	3	0	0	1	2	8	4	4	3	1
ABCB10__chr1	17	7	24	4	10	6	13	24	20	16	0	5
ABCB1__chr7	0	1	3	1	1	0	2	1	2	1	0	0
ABCB4__chr7	1	0	0	0	0	0	0	0	0	0	0	0
ABCB5__chr7	5	0	1	0	0	0	0	2	1	1	1	0
ABCB6__chr2	36	15	22	5	12	14	46	95	16	26	1	4
ABCB7__chrX	72	36	50	8	29	25	33	81	27	35	2	3
ABCB8__chr7	19	16	19	2	4	5	17	35	33	20	0	0
ABCB9__chr12	34	11	28	1	4	7	22	19	27	47	1	7
ABCC10__chr6	18	9	17	3	5	4	9	24	25	18	1	1
ABCC13__chr21	2	0	0	0	0	1	1	0	0	0	0	0
ABCC1__chr16	34	27	25	6	15	9	14	31	29	24	1	4
ABCC2__chr10	0	0	0	0	0	0	0	1	0	0	0	0
ABCC3__chr17	0	0	0	0	0	0	0	3	0	0	0	0
ABCC4__chr13	48	18	15	7	9	10	11	26	15	10	0	0
ABCC5__chr3	76	38	94	17	20	28	37	70	79	68	7	15
ABCC6P1__chr16	0	2	1	0	0	0	1	1	2	0	0	0
ABCC6__chr16	3	6	2	0	0	0	0	2	0	0	0	0
ABCC8__chr11	3	1	3	1	1	3	2	7	5	10	0	0
ABCC9__chr12	5	8	22	1	3	3	11	11	1	1	0	0
ABCD1__chrX	13	7	5	0	10	5	8	5	20	13	0	1
ABCD2__chr12	0	0	1	0	0	1	1	4	0	1	0	0
ABCD3__chr1	226	112	276	44	75	72	148	268	99	117	7	27
ABCD4__chr14	69	41	63	13	16	25	42	82	35	36	3	5
ABCE1__chr4	122	74	105	21	43	50	117	193	46	52	3	8
ABCF1__chr6	153	97	146	29	59	72	114	185	102	110	5	11
ABCF2__chr7	147	103	103	19	45	67	117	219	175	97	5	18
ABCF3__chr3	70	44	70	13	35	32	64	117	37	45	3	6
ABCG1__chr21	12	4	8	0	0	0	4	5	11	7	2	0
ABCG4__chr11	9	3	21	8	2	1	7	21	10	21	0	2
ABHD10__chr3	217	103	235	29	57	75	168	284	203	198	22	32
ABHD11__chr7	64	37	58	4	21	23	50	105	45	45	1	4
ABHD12B__chr14	1	0	2	1	0	0	0	0	0	2	0	0
ABHD12__chr20	138	87	219	30	56	79	143	290	120	130	11	20
ABHD13__chr13	45	19	48	10	20	21	31	65	31	20	1	4
ABHD14A__chr3	168	104	131	16	60	65	103	271	174	141	16	18
ABHD14B__chr3	13	5	12	2	5	5	11	8	6	2	0	0
ABHD15__chr17	17	4	15	2	3	2	8	20	6	5	0	0
ABHD16A__chr6	384	226	409	64	141	144	289	488	273	261	13	23
ABHD16B__chr20	0	0	0	0	1	0	0	0	0	0	0	0
ABHD1__chr2	0	1	1	0	3	0	2	0	3	0	0	0
ABHD2__chr15	89	53	109	15	42	46	83	147	90	100	9	11
ABHD3__chr18	57	27	62	9	21	18	25	53	9	9	3	7
ABHD4__chr14	324	189	278	42	129	160	221	470	174	132	4	15
ABHD5__chr3	66	28	59	5	26	31	33	100	42	43	4	10
ABHD6__chr3	20	13	24	4	4	5	17	28	28	30	3	6
ABHD8__chr19	93	53	118	19	39	20	77	142	114	106	7	17
ABI1__chr10	72	34	83	11	35	29	48	91	64	72	6	10
ABI2__chr2	1206	738	1323	201	436	427	890	1601	1068	1178	74	183
ABI3BP__chr3	0	0	0	0	0	0	0	1	0	0	0	0
ABI3__chr17	0	0	0	0	1	0	0	0	0	0	0	0
ABL1__chr9	518	288	554	74	144	182	389	698	419	459	27	51
ABL2__chr1	97	57	118	14	39	61	82	166	135	94	8	13
ABLIM1__chr10	68	31	76	12	39	61	64	123	67	94	8	7
ABLIM2__chr4	18	10	16	3	10	4	13	22	36	53	1	4
ABLIM3__chr5	3	1	4	0	0	1	4	5	10	11	1	1
ABRACL__chr6	294	181	211	37	149	174	166	368	244	212	25	37
ABR__chr17	160	101	261	33	67	46	126	229	226	223	21	34
ABT1__chr6	83	46	58	11	26	35	50	75	39	55	3	12
ABTB1__chr3	5	1	7	1	1	1	3	2	1	3	0	0
ABTB2__chr11	27	24	73	9	22	18	58	84	15	21	1	2
ACAA1__chr3	88	35	119	12	29	32	44	141	61	54	2	14
ACAA2__chr18	298	208	190	33	85	96	111	216	87	85	6	11
ACACA__chr17	71	37	65	6	24	23	48	104	75	68	4	18
ACACB__chr12	11	6	16	2	2	2	3	9	5	4	0	0
ACAD10__chr12	48	15	31	2	14	12	15	45	25	23	1	1
ACAD8__chr11	41	28	55	4	17	16	37	58	42	43	2	4
ACAD9__chr3	97	47	72	14	35	33	59	110	52	64	1	10
ACADL__chr2	0	1	0	0	2	0	0	1	0	0	0	0
ACADM__chr1	196	112	184	25	55	64	89	157	92	109	10	18
ACADSB__chr10	25	19	41	10	14	16	37	54	35	61	17	6
ACADS__chr12	6	3	7	1	1	2	4	9	5	4	1	0
ACADVL__chr17	202	95	167	26	48	65	77	182	124	84	8	12
ACAP1__chr17	7	7	12	0	6	6	5	10	6	6	0	1
ACAP2__chr3	97	67	95	17	44	33	77	114	69	69	2	3
ACAP3__chr1	38	23	35	4	11	18	28	49	38	40	3	5
ACAT1__chr11	93	52	76	21	31	37	70	124	64	59	3	12
ACAT2__chr6	30	22	43	8	13	15	20	62	22	16	3	8
ACBD3__chr1	98	55	101	22	53	46	111	150	125	104	7	21
ACBD4__chr17	11	4	17	1	3	3	10	24	11	5	2	3
ACBD5__chr10	38	15	44	11	22	13	36	49	31	23	1	8
ACBD6__chr1	550	395	583	108	194	184	478	839	517	423	37	57
ACBD7__chr10	127	47	86	13	39	29	47	125	26	53	2	9
ACCS__chr11	0	0	0	0	0	0	0	0	0	1	0	0
ACD__chr16	93	73	90	10	29	40	72	151	104	77	5	15
ACE2__chrX	1	0	1	0	1	0	4	5	0	1	3	0
ACER2__chr9	2	4	3	0	2	2	0	5	2	2	0	2
ACER3__chr11	42	23	60	3	21	19	41	96	38	36	3	4
ACE__chr17	0	0	2	0	0	0	0	0	1	0	0	0
ACHE__chr7	4	1	15	2	7	2	5	13	22	17	1	3
ACIN1__chr14	490	256	498	76	140	189	307	697	531	423	16	55
ACLY__chr17	447	273	501	74	195	195	349	680	359	345	20	57
ACMSD__chr2	0	0	0	0	0	0	0	0	0	1	0	0
ACN9__chr7	397	233	319	40	132	142	223	436	193	213	15	32
ACO1__chr9	88	45	56	8	42	42	68	139	54	57	5	7
ACO2__chr22	1	3	3	2	3	0	3	4	2	3	0	0
ACOT11__chr1	1	2	1	0	1	0	1	10	1	0	1	0
ACOT12__chr5	0	0	0	0	0	0	0	5	0	0	0	0
ACOT13__chr6	122	91	86	9	67	63	95	186	102	91	8	11
ACOT2__chr14	0	0	0	0	1	0	0	0	1	0	0	0
ACOT7__chr1	977	649	902	125	608	622	958	2076	1380	1194	105	196
ACOT8__chr20	17	12	20	5	7	13	13	23	11	9	1	0
ACOT9__chrX	73	41	65	7	30	44	77	101	27	17	2	4
ACOX1__chr17	96	47	149	16	26	34	106	177	125	129	16	32
ACOX2__chr3	5	2	5	3	3	3	1	9	3	0	0	0
ACOX3__chr4	36	25	43	4	16	23	29	49	40	38	1	3
ACOXL__chr2	0	0	0	0	0	0	0	0	0	1	0	0
ACP1__chr2	497	273	431	75	211	225	327	740	292	255	15	39
ACP2__chr11	46	29	63	4	30	11	43	95	39	40	4	8
ACP6__chr1	30	8	37	5	16	20	15	36	18	10	2	1
ACPL2__chr3	72	26	51	3	11	19	35	39	70	49	2	9
ACPP__chr3	0	0	0	0	0	0	0	2	0	0	0	0
ACRBP__chr12	4	1	3	0	1	0	0	1	2	2	0	1
ACRC__chrX	6	2	9	0	2	2	7	15	11	3	0	0
ACRV1__chr11	0	0	1	0	0	0	0	0	2	5	0	1
ACR__chr22	0	0	0	0	0	1	0	0	1	1	0	0
ACSBG1__chr15	73	34	72	15	9	7	16	19	3	3	0	2
ACSF2__chr17	22	14	12	3	5	4	5	5	3	4	0	0
ACSF3__chr16	29	19	24	2	14	11	19	43	36	26	3	1
ACSL1__chr4	19	11	38	2	10	8	26	50	36	34	4	7
ACSL3__chr2	180	87	126	19	106	100	133	233	123	113	9	20
ACSL4__chrX	98	54	83	10	45	47	48	102	141	112	14	18
ACSL5__chr10	0	0	0	0	0	0	0	0	2	0	0	0
ACSL6__chr5	10	1	8	1	1	0	3	9	1	9	1	0
ACSM1__chr16	0	0	0	0	0	0	0	1	0	0	0	0
ACSM2A__chr16	0	0	0	0	0	0	0	0	1	1	0	0
ACSM3__chr16	0	0	0	0	0	0	0	0	1	0	0	0
ACSM4__chr12	0	0	0	0	0	1	0	0	0	0	0	0
ACSS1__chr20	7	6	23	5	1	0	17	20	1	3	0	4
ACSS2__chr20	97	50	62	9	24	36	41	90	65	47	5	7
ACSS3__chr12	3	2	1	0	1	0	2	0	1	3	0	0
ACTA1__chr1	6	12	7	3	10	24	22	64	13	10	0	2
ACTA2__chr10	528	282	308	63	323	466	476	889	846	449	23	52
ACTBL2__chr5	0	0	0	0	0	0	1	0	0	0	0	0
ACTB__chr7	26482	17972	29513	3592	10512	14542	21420	45193	16265	15836	1047	2013
ACTC1__chr15	54	29	33	7	56	75	55	82	76	25	2	1
ACTG1P4__chr1	0	0	2	0	0	0	0	2	0	2	0	0
ACTG1__chr17	29399	18673	32378	4660	13522	14424	26591	49236	27299	26638	1983	4012
ACTG2__chr2	33	30	42	12	58	90	76	177	173	75	2	9
ACTL10__chr20	0	0	2	0	1	0	3	3	0	0	0	0
ACTL6A__chr3	233	106	187	21	70	71	121	187	107	112	10	17
ACTL6B__chr7	43	26	158	22	30	30	124	213	370	345	36	36
ACTL7B__chr9	0	0	0	0	0	0	0	1	0	0	0	0
ACTL8__chr1	0	0	0	0	0	0	1	0	0	0	0	0
ACTN1-AS1__chr14	0	0	0	0	0	0	0	1	0	0	0	0
ACTN1__chr14	1508	1033	1129	167	1371	1538	1440	3883	1260	804	44	70
ACTN2__chr1	3	5	7	0	2	1	6	7	3	2	0	0
ACTN3__chr11	0	0	0	0	0	0	0	0	0	1	0	0
ACTN4__chr19	1035	676	951	142	452	581	714	1528	639	600	31	68
ACTR10__chr14	211	142	239	38	92	106	223	391	256	244	30	49
ACTR1A__chr10	986	819	1012	152	423	506	929	1637	1634	1651	106	179
ACTR1B__chr2	123	70	141	13	29	26	69	134	115	102	10	14
ACTR2__chr2	358	226	426	43	174	214	358	681	355	337	19	47
ACTR3BP5__chr10	0	0	0	1	0	0	3	0	1	1	1	0
ACTR3B__chr7	72	31	66	7	14	14	54	79	61	47	3	10
ACTR3C__chr7	0	0	0	0	1	0	2	1	0	0	0	0
ACTR3__chr2	400	285	439	96	258	277	418	720	426	357	36	52
ACTR5__chr20	37	9	27	3	12	11	18	38	25	26	2	2
ACTR6__chr12	64	49	76	20	24	32	67	97	65	64	9	8
ACTR8__chr3	53	26	50	8	29	15	38	72	27	19	1	6
ACVR1B__chr12	90	62	133	16	43	43	116	161	171	144	14	28
ACVR1C__chr2	1	2	5	0	1	0	1	2	0	0	0	0
ACVR1__chr2	95	50	122	23	49	42	108	294	90	82	9	33
ACVR2A__chr2	67	35	69	18	49	42	83	130	88	85	8	15
ACVR2B-AS1__chr3	16	4	24	4	6	15	10	22	7	23	0	5
ACVR2B__chr3	91	57	108	16	34	33	61	86	88	101	5	12
ACVRL1__chr12	1	0	0	0	1	0	0	0	0	0	0	0
ACYP1__chr14	163	91	142	34	42	54	82	155	78	82	9	14
ACYP2__chr2	14	5	17	2	2	8	5	20	12	11	0	2
ADAL__chr15	52	29	54	12	13	21	37	77	31	33	2	7
ADAM10__chr15	8	2	11	2	3	4	5	9	7	1	1	1
ADAM11__chr17	2	0	4	0	0	1	0	1	4	1	0	0
ADAM12__chr10	28	32	54	2	25	33	37	110	80	42	2	7
ADAM15__chr1	12	3	13	0	5	5	10	13	8	1	0	0
ADAM17__chr2	73	39	78	14	22	22	32	65	35	27	4	9
ADAM18__chr8	0	0	0	0	0	2	0	1	3	1	0	0
ADAM19__chr5	74	48	51	6	57	87	49	146	150	92	9	10
ADAM1A__chr12	2	0	2	0	0	0	3	1	3	1	0	0
ADAM20P1__chr14	0	1	2	1	1	1	0	3	1	4	0	0
ADAM20__chr14	0	0	0	0	0	0	0	5	0	0	0	0
ADAM21__chr14	6	2	5	0	0	1	0	4	1	1	0	0
ADAM22__chr7	34	22	59	7	16	8	30	49	58	47	3	11
ADAM23__chr2	16	4	2	2	4	5	10	18	8	17	2	2
ADAM28__chr8	1	1	1	1	0	0	1	2	1	0	0	0
ADAM29__chr4	0	0	0	0	1	0	0	0	0	1	0	0
ADAM30__chr1	0	0	0	0	0	0	0	0	0	0	0	1
ADAM32__chr8	1	0	2	1	0	1	1	1	1	0	0	0
ADAM33__chr20	3	1	3	1	1	0	1	6	2	2	0	0
ADAM3A__chr8	0	0	0	0	0	0	0	0	0	1	0	0
ADAM8__chr10	1	0	2	0	1	0	3	0	2	0	0	0
ADAM9__chr8	140	81	233	31	108	127	221	515	99	77	5	12
ADAMTS10__chr19	33	5	27	4	12	6	17	16	65	45	4	5
ADAMTS12__chr5	11	7	9	0	1	1	2	11	1	2	0	0
ADAMTS13__chr9	5	7	4	0	0	0	3	3	6	11	0	0
ADAMTS14__chr10	0	0	0	0	0	0	0	0	1	0	0	0
ADAMTS15__chr11	10	5	7	0	7	3	7	22	3	3	0	0
ADAMTS16__chr5	3	3	2	4	7	8	10	47	12	8	0	0
ADAMTS17__chr15	0	4	0	0	0	0	1	1	0	1	0	0
ADAMTS18__chr16	1	0	1	0	0	0	0	0	0	0	1	0
ADAMTS19__chr5	1	1	0	0	0	0	1	0	0	0	1	0
ADAMTS1__chr21	4	4	3	0	5	10	4	23	5	0	0	0
ADAMTS2__chr5	0	0	4	1	0	2	2	2	5	0	0	0
ADAMTS3__chr4	17	12	104	13	2	1	9	20	6	6	0	0
ADAMTS4__chr1	0	0	1	0	0	0	0	1	1	0	0	0
ADAMTS5__chr21	17	7	18	4	3	7	12	34	12	14	2	2
ADAMTS6__chr5	5	8	9	1	2	1	3	3	2	3	0	0
ADAMTS7__chr15	148	74	171	17	31	33	65	124	162	174	13	19
ADAMTS8__chr11	1	3	0	0	0	0	0	3	0	0	0	0
ADAMTS9-AS2__chr3	0	0	0	0	1	0	1	0	0	0	0	0
ADAMTS9__chr3	18	11	26	3	13	15	29	79	23	27	1	1
ADAMTSL1__chr9	4	1	3	0	1	0	4	14	0	1	2	0
ADAMTSL2__chr9	1	0	0	0	0	1	0	0	1	0	0	0
ADAMTSL3__chr15	1	0	0	0	0	0	0	2	2	0	0	0
ADAMTSL4__chr1	3	1	3	0	1	1	2	2	2	1	0	0
ADAMTSL5__chr19	3	0	2	0	1	2	1	3	3	1	0	0
ADAP1__chr7	4	3	6	0	1	1	6	10	12	13	1	0
ADAP2__chr17	1	0	0	0	0	0	0	0	0	1	0	0
ADARB1__chr21	39	22	30	7	8	15	14	49	31	35	2	5
ADARB2__chr10	7	0	5	2	4	4	1	7	51	45	0	3
ADAR__chr1	418	211	471	63	143	159	305	656	384	358	20	52
ADAT1__chr16	39	20	52	7	19	8	24	42	30	35	1	4
ADAT2__chr6	16	28	24	5	6	24	17	30	14	7	4	3
ADAT3__chr19	16	8	18	2	3	1	4	10	15	8	0	4
ADA__chr20	72	43	39	7	17	18	36	61	39	27	0	3
ADCK1__chr14	37	29	32	4	13	13	22	58	32	22	0	5
ADCK2__chr7	24	13	23	2	10	4	16	31	35	23	3	8
ADCK3__chr1	20	9	8	2	7	3	6	18	3	16	0	2
ADCK4__chr19	30	19	25	7	10	8	17	56	26	30	3	4
ADCK5__chr8	6	7	10	0	3	7	9	10	8	6	0	0
ADCY10P1__chr6	5	4	5	1	1	0	2	5	5	2	1	1
ADCY1__chr7	12	7	19	2	4	9	16	25	26	32	4	3
ADCY2__chr5	7	1	24	3	7	8	14	30	17	14	1	7
ADCY3__chr2	17	3	18	3	1	1	4	12	5	6	0	2
ADCY5__chr3	8	6	23	2	1	3	9	18	47	30	1	2
ADCY6__chr12	17	8	28	3	5	8	12	29	20	18	0	2
ADCY7__chr16	8	8	4	0	5	1	5	10	12	2	0	0
ADCY8__chr8	1	0	0	0	0	0	0	1	0	0	0	0
ADCY9__chr16	18	11	21	5	4	17	16	23	38	34	3	5
ADCYAP1R1__chr7	19	17	20	2	1	2	4	4	2	7	1	0
ADCYAP1__chr18	15	6	7	2	11	16	4	8	9	5	0	0
ADC__chr1	16	10	6	1	2	1	7	15	11	10	1	1
ADD1__chr4	973	534	950	114	375	333	767	1110	1047	902	63	130
ADD2__chr2	95	56	107	10	39	54	108	177	155	145	18	19
ADD3__chr10	55	51	134	26	16	28	49	99	22	26	7	6
ADGB__chr6	0	0	1	0	0	0	0	0	0	0	0	0
ADH4__chr4	7	2	10	3	2	1	3	15	11	13	7	4
ADH5__chr4	1837	1139	1655	215	734	803	1151	2477	901	897	73	111
ADHFE1__chr8	11	2	13	7	1	6	3	10	4	4	0	1
ADI1__chr2	101	65	136	23	42	38	81	149	64	55	4	15
ADIPOQ-AS1__chr3	5	3	4	1	2	3	2	2	3	7	2	4
ADIPOR1__chr1	224	133	276	38	126	146	222	456	207	195	18	34
ADIPOR2__chr12	87	43	98	21	39	30	65	130	61	59	5	6
ADK__chr10	192	135	202	35	66	98	175	262	102	64	12	10
ADM2__chr22	18	8	9	1	5	6	11	29	11	6	1	1
ADM5__chr19	13	11	12	1	7	7	14	17	4	8	1	1
ADM__chr11	48	35	63	16	47	75	82	285	74	39	4	9
ADNP2__chr18	99	59	104	8	35	33	77	107	61	48	5	7
ADNP__chr20	177	102	252	38	71	65	146	253	210	161	12	20
ADORA1__chr1	0	1	3	0	0	1	6	9	7	7	0	1
ADORA2A__chr22	4	0	3	0	0	0	2	2	5	5	1	1
ADORA2B__chr17	2	2	1	0	1	1	3	5	1	1	1	0
ADO__chr10	148	104	158	19	68	58	127	237	123	117	2	17
ADPGK-AS1__chr15	0	0	0	0	1	0	0	0	0	0	0	0
ADPGK__chr15	52	29	48	7	24	19	47	92	36	24	1	6
ADPRHL1__chr13	16	10	7	2	3	3	14	11	16	5	0	2
ADPRHL2__chr1	83	58	83	8	30	28	48	130	66	49	6	11
ADPRH__chr3	4	4	4	1	1	1	2	3	4	0	0	0
ADPRM__chr17	41	27	28	1	13	8	19	30	32	33	3	4
ADRA1B__chr5	0	0	0	0	0	0	0	1	1	0	0	0
ADRA1D__chr20	1	1	6	1	1	2	3	15	1	1	0	0
ADRA2A__chr10	3	2	8	2	0	2	9	14	27	10	1	9
ADRA2B__chr2	1	0	0	0	1	0	0	0	0	0	0	0
ADRA2C__chr4	6	2	2	0	1	3	1	4	2	5	1	1
ADRB1__chr10	0	0	1	0	0	0	1	3	0	0	1	0
ADRB2__chr5	10	8	2	1	18	10	2	13	5	4	0	0
ADRBK1__chr11	205	127	211	32	70	74	174	305	250	198	22	18
ADRBK2__chr22	52	44	64	9	16	9	33	56	59	83	8	10
ADRM1__chr20	355	184	249	38	166	158	244	501	227	179	9	24
ADSL__chr22	380	236	318	50	172	173	297	561	202	182	20	21
ADSSL1__chr14	28	9	21	4	4	6	7	12	3	4	0	1
ADSS__chr1	131	78	117	12	47	38	69	118	91	99	12	20
AEBP1__chr7	36	27	37	6	16	18	6	34	16	18	0	2
AEBP2__chr12	75	46	78	11	13	28	43	74	39	26	5	4
AEN__chr15	210	117	132	22	180	125	203	434	159	90	7	20
AES__chr19	910	519	900	124	377	408	677	1356	1115	903	88	182
AFAP1-AS1__chr4	0	0	0	0	0	0	0	1	0	0	0	0
AFAP1L1__chr5	0	1	1	0	0	3	0	2	0	3	1	0
AFAP1L2__chr10	7	5	4	2	0	0	0	1	1	2	0	0
AFAP1__chr4	133	79	231	34	83	60	181	348	331	334	28	51
AFF1__chr4	31	14	56	6	11	12	31	34	11	14	2	0
AFF2__chrX	165	82	83	10	37	26	46	67	113	104	4	8
AFF3__chr2	29	14	64	7	10	6	44	76	68	66	4	15
AFF4__chr5	155	91	203	28	70	92	138	261	206	175	8	26
AFG3L1P__chr16	55	35	67	17	9	13	26	57	41	29	0	5
AFG3L2__chr18	335	193	307	45	113	123	211	387	222	210	18	25
AFMID__chr17	35	17	36	8	20	16	23	47	11	14	2	2
AFP__chr4	0	1	0	0	1	3	1	3	1	1	0	0
AFTPH__chr2	67	46	99	25	38	28	44	119	94	89	7	13
AGAP11__chr10	0	0	0	0	0	0	0	1	0	0	0	0
AGAP1__chr2	142	103	222	27	58	55	123	210	253	253	16	29
AGAP2__chr12	23	9	38	5	6	3	17	38	47	42	2	8
AGAP3__chr7	98	69	96	7	21	31	59	120	148	156	10	16
AGAP6__chr10	0	0	0	0	0	0	2	0	0	0	0	0
AGA__chr4	64	47	66	5	13	22	31	103	35	21	2	3
AGBL2__chr11	0	0	0	0	0	1	1	0	0	0	0	0
AGBL3__chr7	1	1	1	0	0	2	0	2	0	1	0	0
AGBL4__chr1	4	1	6	0	0	0	4	2	2	2	1	0
AGBL5__chr2	89	45	82	9	26	35	44	76	65	39	5	7
AGER__chr6	28	17	23	4	11	18	11	46	16	16	0	3
AGFG1__chr2	127	86	176	24	44	57	105	175	136	131	15	14
AGFG2__chr7	12	7	13	0	3	3	4	8	11	3	0	1
AGGF1__chr5	95	44	96	13	23	24	70	120	53	53	4	9
AGK__chr7	151	67	117	28	45	77	120	183	118	112	8	15
AGL__chr1	57	30	47	8	24	17	18	51	24	30	4	4
AGMAT__chr1	0	2	4	0	4	1	2	4	5	1	0	0
AGMO__chr7	1	0	1	0	1	1	0	2	2	1	0	1
AGPAT1__chr6	105	67	105	14	47	47	71	180	140	95	10	13
AGPAT2__chr9	23	12	14	1	14	13	8	20	10	4	0	0
AGPAT3__chr21	91	60	118	21	56	60	111	280	96	97	3	16
AGPAT4-IT1__chr6	26	9	41	1	8	4	18	43	35	24	1	6
AGPAT4__chr6	214	140	270	34	85	74	139	263	192	219	13	35
AGPAT5__chr8	522	331	529	78	208	172	338	651	369	290	40	37
AGPAT6__chr8	122	74	154	23	60	44	86	212	151	154	9	21
AGPAT9__chr4	13	4	12	3	7	10	14	26	2	4	0	0
AGPHD1__chr15	9	8	1	0	1	3	0	3	0	1	0	0
AGPS__chr2	292	179	236	48	99	131	197	340	141	170	18	21
AGRN__chr1	251	149	283	24	54	76	105	264	180	166	9	18
AGTPBP1__chr9	67	53	81	12	40	30	53	82	65	62	5	9
AGTR1__chr3	2	0	0	0	0	0	0	0	0	1	0	0
AGTRAP__chr1	122	81	71	9	16	36	56	73	42	24	0	2
AGT__chr1	1	0	1	0	0	1	5	0	1	0	0	0
AGXT2L1__chr4	0	0	0	0	0	0	0	0	0	1	0	0
AGXT2L2__chr5	12	11	11	0	2	3	9	16	10	2	0	0
AHCTF1__chr1	431	275	423	78	147	140	313	494	275	259	11	30
AHCYL1__chr1	472	378	614	93	111	131	291	545	263	304	26	31
AHCYL2__chr7	55	34	39	4	24	27	31	60	55	44	6	10
AHCY__chr20	472	295	352	54	234	202	319	639	216	168	17	21
AHDC1__chr1	20	8	27	3	10	6	14	19	23	26	1	2
AHI1__chr6	96	63	109	17	28	33	54	124	50	59	3	15
AHNAK2__chr14	24	19	33	2	32	54	27	59	58	42	2	7
AHNAK__chr11	627	337	571	101	355	429	336	1049	339	235	19	22
AHRR__chr5	2	2	5	0	3	2	4	7	6	1	0	1
AHR__chr7	2	2	7	0	6	1	4	7	6	4	0	1
AHSA1__chr14	88	28	60	18	46	36	67	145	69	75	9	12
AHSA2__chr2	48	35	39	6	13	16	30	60	36	29	1	4
AHSG__chr3	2	2	4	0	3	0	7	6	10	11	0	3
AICDA__chr12	0	2	0	0	0	0	0	0	0	2	0	0
AIDA__chr1	392	219	384	48	188	230	287	488	220	189	11	32
AIF1L__chr9	273	172	305	37	49	39	108	204	59	50	1	10
AIF1__chr6	0	0	0	0	1	0	0	0	0	0	0	0
AIFM1__chrX	79	47	73	5	36	26	46	69	55	49	2	4
AIFM2__chr10	69	29	38	6	23	58	65	163	46	34	5	6
AIFM3__chr22	0	0	1	0	0	0	0	2	0	0	0	0
AIG1__chr6	60	51	49	9	36	35	61	89	46	56	5	3
AIM1L__chr1	17	8	1	1	13	8	4	7	2	6	1	0
AIM1__chr6	2	0	3	2	1	1	7	2	8	8	0	0
AIM2__chr1	5	3	9	0	2	0	7	7	3	8	0	2
AIMP1__chr4	248	158	269	54	112	148	207	384	221	186	11	32
AIMP2__chr7	0	3	5	0	0	1	2	4	0	0	0	0
AIPL1__chr17	2	0	3	0	0	0	2	2	3	1	0	0
AIP__chr11	156	103	174	20	72	69	111	192	153	143	12	20
AIRE__chr21	0	0	0	0	0	1	0	1	0	1	0	0
AJAP1__chr1	0	0	3	0	0	0	0	1	1	0	0	0
AJUBA__chr14	148	121	112	33	83	96	141	337	58	39	3	4
AK1__chr9	100	72	185	30	33	58	136	226	230	258	13	40
AK2__chr1	305	191	290	58	133	144	239	527	151	155	6	21
AK3__chr9	430	267	420	77	193	184	297	565	266	264	19	32
AK4__chr1	122	76	89	11	29	34	48	59	38	37	2	2
AK5__chr1	30	29	7	3	4	4	9	6	10	14	0	0
AK7__chr14	14	4	18	2	4	2	11	18	5	5	0	2
AK8__chr9	2	5	2	1	1	3	2	3	5	1	0	0
AKAP10__chr17	87	40	73	19	26	33	45	98	50	51	4	9
AKAP11__chr13	58	31	84	7	26	21	51	97	84	95	5	13
AKAP12__chr6	383	232	387	68	224	249	254	529	323	251	13	37
AKAP13__chr15	143	54	107	16	28	33	62	91	96	107	6	12
AKAP14__chrX	1	2	1	0	4	2	0	4	11	6	0	2
AKAP1__chr17	28	13	27	4	11	11	19	44	25	20	0	2
AKAP3__chr12	6	6	18	0	0	10	3	11	8	5	0	0
AKAP5__chr14	16	9	13	3	6	4	10	27	18	18	1	3
AKAP6__chr14	27	15	44	8	8	9	29	50	108	79	9	11
AKAP7__chr6	47	17	45	16	16	20	32	74	28	17	5	8
AKAP8L__chr19	12	7	5	3	8	6	8	15	12	9	0	1
AKAP8__chr19	235	146	252	39	71	85	127	240	154	121	12	26
AKAP9__chr7	104	51	157	26	45	42	121	188	167	178	17	28
AKD1__chr6	19	7	17	0	3	6	6	19	30	17	0	7
AKIP1__chr11	71	32	58	6	32	29	59	130	61	56	5	5
AKIRIN1__chr1	215	123	269	40	86	117	155	309	212	190	13	27
AKIRIN2__chr6	519	336	680	78	212	235	445	810	469	440	36	68
AKNAD1__chr1	0	0	1	0	0	0	0	2	0	0	0	0
AKNA__chr9	38	33	41	5	17	19	33	56	37	27	2	4
AKR1A1__chr1	376	253	355	57	138	140	274	517	218	219	18	35
AKR1B10__chr7	1	1	4	0	1	2	0	2	2	1	0	0
AKR1B15__chr7	0	0	0	2	0	0	0	1	1	0	0	0
AKR1B1__chr7	401	245	328	48	168	135	233	436	283	263	20	35
AKR1C1__chr10	4	2	12	0	1	6	8	28	37	33	5	8
AKR1C2__chr10	4	0	8	1	2	1	5	10	31	18	2	2
AKR1C3__chr10	1	2	0	0	0	1	1	7	2	0	0	0
AKR1D1__chr7	0	0	0	1	1	3	0	1	1	1	1	1
AKR1E2__chr10	1	0	1	0	0	0	1	0	0	0	0	0
AKR7A2P1__chr1	0	0	0	0	0	0	0	1	0	0	0	0
AKR7A2__chr1	688	416	600	94	265	214	422	765	375	302	25	46
AKR7A3__chr1	4	0	2	0	0	0	0	0	0	0	0	0
AKR7L__chr1	9	5	3	2	0	2	3	5	2	3	0	1
AKT1S1__chr19	463	258	438	54	205	244	346	852	324	261	20	35
AKT1__chr14	329	211	340	50	124	111	232	510	315	305	18	26
AKT2__chr19	271	145	246	27	73	88	172	329	175	175	12	33
AKT3__chr1	152	74	132	24	60	67	138	225	157	137	6	19
AKTIP__chr16	51	44	54	6	16	17	43	89	57	55	6	13
ALAD__chr9	121	76	121	14	40	31	51	110	105	98	6	16
ALAS1__chr3	174	99	140	34	63	57	111	230	168	173	10	25
ALB__chr4	0	0	1	0	0	0	0	0	0	0	0	0
ALCAM__chr3	142	65	135	34	51	63	102	216	140	103	6	21
ALDH16A1__chr19	146	95	117	22	35	52	49	124	56	60	3	10
ALDH18A1__chr10	185	103	149	19	64	59	119	212	121	78	12	12
ALDH1A1__chr9	0	1	0	1	0	0	1	0	0	0	1	0
ALDH1A2__chr15	0	0	0	0	2	5	3	3	3	3	0	0
ALDH1B1__chr9	57	43	56	6	16	31	50	82	39	30	5	7
ALDH1L1-AS1__chr3	0	0	1	0	0	0	0	0	0	1	0	0
ALDH1L1__chr3	0	0	0	0	0	0	1	1	0	0	0	0
ALDH1L2__chr12	7	2	4	0	1	2	8	10	4	6	0	0
ALDH2__chr12	247	149	208	37	70	99	148	238	190	225	16	36
ALDH3A2__chr17	147	98	143	13	51	51	80	167	71	75	4	11
ALDH3B1__chr11	0	2	3	3	0	2	3	10	1	0	0	3
ALDH4A1__chr1	23	19	33	2	13	8	25	37	26	18	0	0
ALDH5A1__chr6	60	33	54	16	18	27	44	84	47	45	7	12
ALDH6A1__chr14	19	19	50	9	7	5	12	15	5	10	3	0
ALDH7A1__chr5	1197	762	999	162	364	351	515	981	541	459	34	58
ALDH8A1__chr6	1	2	4	0	1	4	6	15	6	9	0	1
ALDH9A1__chr1	173	115	218	35	61	54	144	242	80	82	10	19
ALDOA__chr16	933	620	840	140	526	576	1021	2280	571	516	42	74
ALDOC__chr17	25	11	14	6	10	14	11	22	8	6	0	1
ALG10B__chr12	21	11	28	4	11	11	13	26	14	18	0	3
ALG10__chr12	1	3	5	0	3	1	5	8	1	4	2	1
ALG11__chr13	1	2	2	0	2	2	2	4	0	3	0	0
ALG12__chr22	225	135	199	33	108	111	188	380	189	152	8	19
ALG13__chrX	104	61	99	20	48	45	82	161	72	73	4	12
ALG14__chr1	70	39	66	7	28	31	68	109	44	45	2	5
ALG1L9P__chr11	0	5	4	0	0	2	1	2	5	3	0	0
ALG1L__chr3	0	0	0	0	0	0	0	1	1	0	0	0
ALG1__chr16	5	8	15	0	6	3	8	13	8	12	1	1
ALG2__chr9	190	145	223	27	131	128	150	375	113	106	6	18
ALG3__chr3	507	322	367	51	203	278	425	854	316	265	17	24
ALG5__chr13	595	364	588	79	264	318	439	807	387	362	24	53
ALG6__chr1	56	41	42	11	15	14	42	45	31	35	4	12
ALG8__chr11	168	103	118	20	70	83	110	219	64	52	4	7
ALG9__chr11	173	131	183	33	95	71	106	234	163	139	10	11
ALKBH1__chr14	20	24	33	8	9	15	18	36	27	18	0	6
ALKBH2__chr12	69	89	62	9	23	21	47	102	34	31	4	6
ALKBH3__chr11	28	12	16	7	13	12	18	49	20	11	0	2
ALKBH4__chr7	11	5	11	0	6	5	3	11	12	7	0	0
ALKBH5__chr17	420	326	604	81	127	182	352	581	294	367	45	39
ALKBH6__chr19	12	8	24	1	8	6	14	19	13	15	1	3
ALKBH7__chr19	164	117	151	22	74	66	133	193	171	161	17	22
ALKBH8__chr11	6	8	7	0	4	3	4	10	6	4	3	0
ALK__chr2	6	4	15	2	0	2	4	6	9	13	0	2
ALLC__chr2	0	0	0	0	2	2	0	0	2	0	0	0
ALMS1P__chr2	0	0	1	0	0	0	0	0	0	4	0	1
ALMS1__chr2	104	47	69	10	31	25	46	113	71	49	5	6
ALOX12B__chr17	1	0	1	0	0	0	1	0	1	1	2	0
ALOX12P2__chr17	0	0	0	0	0	0	0	0	0	0	0	1
ALOX12__chr17	0	0	0	0	0	1	0	0	0	0	0	0
ALOX15B__chr17	1	1	0	0	0	0	0	0	0	0	0	0
ALOX15__chr17	0	0	0	0	1	0	0	0	1	0	0	0
ALOX5AP__chr13	0	3	0	0	1	7	1	6	3	9	0	0
ALOX5__chr10	1	0	1	0	0	0	0	0	0	1	0	0
ALOXE3__chr17	1	0	2	0	0	0	1	1	8	0	2	0
ALPK1__chr4	11	2	10	3	0	3	3	7	3	12	5	1
ALPK2__chr18	38	33	18	3	36	48	51	145	41	16	2	5
ALPK3__chr15	10	6	3	0	1	3	1	3	10	6	1	0
ALPL__chr1	75	38	23	8	14	6	10	24	8	9	0	6
ALPP__chr2	0	0	0	0	0	0	0	0	0	2	1	0
ALS2CL__chr3	2	0	1	1	0	0	0	0	0	2	0	0
ALS2CR11__chr2	0	0	0	0	0	0	0	1	2	1	0	0
ALS2CR12__chr2	0	0	2	0	1	2	1	2	1	2	0	0
ALS2CR8__chr2	0	3	11	0	2	3	7	4	4	11	0	0
ALS2__chr2	105	50	111	17	19	34	49	132	97	76	9	14
ALX1__chr12	0	0	0	0	0	0	0	0	1	0	0	0
ALYREF__chr17	372	223	377	37	161	150	253	538	184	135	16	23
AMBN__chr4	7	6	48	8	2	5	35	49	20	16	6	7
AMBP__chr9	1	1	1	0	0	1	0	0	0	0	0	0
AMBRA1__chr11	69	48	100	5	15	15	46	87	81	54	4	10
AMD1__chr6	231	153	137	23	84	99	151	315	121	101	14	11
AMDHD1__chr12	1	0	1	0	0	0	0	3	2	0	0	0
AMDHD2__chr16	3	3	3	0	3	0	1	8	4	5	0	1
AMER1__chrX	46	25	30	0	5	10	19	39	28	24	3	5
AMER2__chr13	11	8	27	3	2	2	14	20	17	28	1	5
AMER3__chr2	7	1	3	0	4	2	10	9	38	30	2	3
AMFR__chr16	91	58	99	15	38	38	74	129	62	66	1	6
AMH__chr19	25	11	11	4	7	5	7	15	24	9	1	3
AMIGO1__chr1	4	2	9	0	2	1	3	6	5	8	1	2
AMIGO2__chr12	31	13	31	2	9	14	15	36	35	21	1	2
AMIGO3__chr3	15	15	19	6	7	9	8	22	7	10	0	0
AMMECR1L__chr2	279	163	317	51	124	124	200	360	227	221	13	29
AMMECR1__chrX	60	41	75	27	24	23	37	63	34	34	3	1
AMN1__chr12	38	18	34	9	15	15	30	73	79	66	7	13
AMOTL1__chr11	214	121	186	22	71	65	124	207	194	177	11	24
AMOTL2__chr3	504	323	477	66	258	269	353	789	327	342	27	43
AMOT__chrX	923	583	304	48	358	350	329	740	283	274	16	26
AMPD2__chr1	96	49	65	11	30	25	60	86	60	77	3	10
AMPD3__chr11	9	1	2	1	2	3	3	11	11	4	0	1
AMPH__chr7	87	53	121	16	20	16	50	87	80	74	2	7
AMT__chr3	13	8	14	2	4	4	6	13	3	10	0	0
AMY2B__chr1	17	9	10	3	9	2	9	25	10	12	2	0
AMZ1__chr7	0	0	0	0	0	0	0	1	2	2	2	0
AMZ2P1__chr17	39	24	69	5	25	7	36	64	40	47	4	7
AMZ2__chr17	189	137	181	30	78	107	118	266	174	142	12	16
ANAPC10__chr4	34	25	46	9	28	23	33	53	26	34	1	3
ANAPC11__chr17	604	340	529	97	243	249	459	906	360	328	31	42
ANAPC13__chr3	626	347	576	81	285	292	485	902	496	527	26	82
ANAPC15__chr11	8	3	4	1	3	4	3	8	0	2	0	0
ANAPC16__chr10	284	189	270	41	103	113	207	402	206	194	15	19
ANAPC1__chr2	104	54	70	8	26	33	41	100	32	41	7	5
ANAPC2__chr9	43	26	31	14	6	12	7	33	23	25	1	2
ANAPC4__chr4	24	18	42	3	12	15	31	39	19	13	2	3
ANAPC5__chr12	406	183	325	69	118	121	215	383	204	159	20	33
ANAPC7__chr12	192	125	191	29	85	67	129	273	105	83	7	17
ANGEL1__chr14	66	34	46	9	9	17	23	56	47	35	0	5
ANGEL2__chr1	93	52	88	22	32	38	67	125	73	60	6	16
ANGPT1__chr8	1	4	6	1	2	0	2	4	2	1	1	1
ANGPT2__chr8	1	2	1	0	0	1	3	2	1	4	2	0
ANGPTL1__chr1	0	1	2	0	0	0	2	5	0	1	0	0
ANGPTL2__chr9	27	27	44	3	10	18	38	29	11	9	2	0
ANGPTL4__chr19	0	0	5	2	0	2	1	5	8	3	0	0
ANGPTL5__chr11	0	0	0	0	0	0	0	1	0	0	0	0
ANGPTL7__chr1	0	0	0	0	0	3	0	0	0	0	0	0
ANG__chr14	44	29	29	5	24	18	9	28	8	12	0	2
ANK1__chr8	9	6	19	4	7	7	18	30	14	17	2	5
ANK2__chr4	335	130	244	39	96	54	191	256	600	278	21	37
ANK3__chr10	81	35	123	20	30	54	80	105	294	337	16	36
ANKAR__chr2	1	1	6	0	3	1	3	2	2	7	0	1
ANKDD1A__chr15	6	3	10	2	3	2	1	4	4	3	0	0
ANKEF1__chr20	10	5	7	1	6	2	8	13	5	6	0	0
ANKFN1__chr17	2	0	3	0	1	0	1	1	0	0	0	0
ANKFY1__chr17	156	147	345	48	40	91	225	304	167	264	16	44
ANKHD1-EIF4EBP3__chr5	0	0	1	0	0	0	0	0	0	0	0	0
ANKHD1__chr5	397	237	326	61	149	95	242	410	221	253	15	28
ANKH__chr5	84	65	84	11	18	25	48	82	69	64	2	17
ANKIB1__chr7	42	24	59	11	28	21	33	61	54	59	4	6
ANKK1__chr11	0	0	0	0	0	0	1	0	0	0	0	0
ANKLE1__chr19	5	1	10	1	8	4	3	13	7	11	0	5
ANKLE2__chr12	168	99	166	28	60	75	101	202	150	123	5	21
ANKMY1__chr2	10	4	17	0	3	3	7	6	7	5	0	0
ANKMY2__chr7	185	96	164	24	41	39	109	160	209	191	15	27
ANKRA2__chr5	71	39	86	10	21	35	45	129	65	72	3	8
ANKRD10__chr13	59	48	58	13	24	26	48	80	83	59	2	5
ANKRD11__chr16	280	176	316	42	125	128	248	409	256	271	11	33
ANKRD12__chr18	56	27	71	14	35	17	69	97	107	184	8	13
ANKRD13A__chr12	153	87	130	21	39	65	84	161	119	121	7	15
ANKRD13B__chr17	90	36	122	18	20	19	56	98	91	101	10	12
ANKRD13C__chr1	118	57	118	19	34	52	96	162	128	101	9	13
ANKRD13D__chr11	76	39	91	9	25	20	31	89	88	82	0	13
ANKRD16__chr10	29	17	25	4	7	11	26	28	22	21	2	7
ANKRD17__chr4	188	126	227	40	94	86	149	259	190	194	10	39
ANKRD18A__chr9	0	0	0	0	0	0	0	1	0	0	0	0
ANKRD18B__chr9	2	1	0	0	0	0	0	0	0	0	1	0
ANKRD18DP__chr3	1	1	0	0	1	2	0	0	0	1	0	0
ANKRD19P__chr9	0	0	0	0	0	0	0	1	0	0	0	0
ANKRD1__chr10	75	67	48	4	109	166	53	198	113	63	3	10
ANKRD20A12P__chr1	7	0	0	0	2	1	1	4	6	6	1	1
ANKRD20A8P__chr2	0	0	1	0	0	0	0	0	0	0	0	1
ANKRD20A9P__chr13	72	53	93	23	27	47	58	147	96	151	34	25
ANKRD22__chr10	0	0	0	0	0	0	0	1	1	1	0	0
ANKRD23__chr2	1	1	0	1	1	2	1	2	2	2	0	0
ANKRD24__chr19	1	0	4	0	1	1	2	3	2	5	0	0
ANKRD26P1__chr16	0	0	0	0	1	0	1	1	0	0	1	0
ANKRD26__chr10	22	24	32	4	10	9	22	36	21	43	1	5
ANKRD27__chr19	91	32	66	16	16	13	42	71	63	55	0	15
ANKRD28__chr3	57	36	49	9	25	28	30	56	57	34	5	3
ANKRD29__chr18	0	1	4	0	0	0	0	1	2	0	1	0
ANKRD2__chr10	0	0	0	0	0	0	1	0	0	0	0	0
ANKRD30A__chr10	0	0	0	0	0	0	0	0	0	0	0	1
ANKRD30BL__chr2	21	5	12	4	7	9	8	13	5	8	1	2
ANKRD30BP2__chr21	0	0	0	0	0	0	1	1	0	2	1	1
ANKRD31__chr5	1	1	2	0	0	1	0	1	0	2	0	0
ANKRD32__chr5	38	23	23	6	10	13	16	24	25	36	0	3
ANKRD33B__chr5	30	29	11	2	31	41	39	71	13	18	0	1
ANKRD33__chr12	0	0	0	0	0	0	0	1	0	1	0	0
ANKRD34A__chr1	24	37	44	9	19	20	69	69	117	69	6	8
ANKRD34B__chr5	0	0	3	0	0	0	0	0	0	1	0	0
ANKRD34C__chr15	0	1	2	0	0	0	0	0	0	0	0	0
ANKRD35__chr1	0	1	4	0	1	0	3	4	2	3	0	0
ANKRD36BP1__chr1	0	0	3	0	1	1	1	5	1	4	0	0
ANKRD36BP2__chr2	0	1	2	1	0	0	0	1	0	0	0	0
ANKRD36B__chr2	9	8	16	1	3	3	6	14	10	14	4	2
ANKRD36__chr2	0	1	1	0	1	1	0	0	1	2	0	0
ANKRD37__chr4	1	3	2	1	6	4	5	16	7	7	0	3
ANKRD39__chr2	67	30	51	6	30	33	45	98	41	34	6	4
ANKRD40__chr17	252	154	247	38	121	123	146	273	144	131	11	15
ANKRD42__chr11	5	3	1	2	2	1	2	5	4	3	0	0
ANKRD44__chr2	14	6	13	4	4	1	10	15	17	18	0	2
ANKRD45__chr1	18	10	14	2	5	3	12	18	10	14	2	2
ANKRD46__chr8	39	15	51	6	17	10	31	44	55	42	6	6
ANKRD49__chr11	22	16	32	6	12	11	24	36	29	24	3	2
ANKRD50__chr4	137	105	175	29	67	80	167	231	237	209	22	30
ANKRD52__chr12	310	171	232	36	122	100	198	450	248	221	18	25
ANKRD53__chr2	6	0	0	0	1	0	0	2	1	4	0	0
ANKRD54__chr22	85	59	73	8	23	25	47	121	58	47	5	13
ANKRD55__chr5	1	0	1	0	0	0	0	3	3	3	0	1
ANKRD61__chr7	1	1	2	0	2	1	1	0	0	1	0	0
ANKRD62P1-PARP4P3__chr22	0	0	0	0	0	0	0	1	0	0	1	0
ANKRD65__chr1	12	7	10	1	5	2	10	20	6	10	2	0
ANKRD6__chr6	116	83	57	5	14	36	25	60	42	52	0	7
ANKRD7__chr7	0	0	0	0	0	0	0	2	0	0	0	0
ANKRD9__chr14	393	223	261	44	106	91	178	301	109	65	4	13
ANKS1A__chr6	51	32	47	4	19	20	46	73	72	75	5	6
ANKS1B__chr12	219	160	540	75	63	60	226	375	231	242	23	43
ANKS3__chr16	15	6	8	1	3	1	15	14	13	6	0	0
ANKS4B__chr16	0	0	0	0	0	0	0	1	1	1	0	0
ANKS6__chr9	55	35	34	7	27	18	29	42	25	27	6	3
ANKUB1__chr3	1	0	0	0	1	2	0	1	0	0	0	0
ANKZF1__chr2	23	6	23	3	7	7	19	29	27	22	0	4
ANLN__chr7	153	70	105	12	51	73	67	121	34	29	0	7
ANO10__chr3	58	37	35	8	28	27	40	77	45	40	2	4
ANO1__chr11	75	38	31	10	25	14	11	14	19	17	1	1
ANO2__chr12	2	1	1	0	0	1	0	1	2	0	0	0
ANO3__chr11	2	0	0	0	0	0	0	0	0	1	0	0
ANO4__chr12	5	4	10	0	7	8	4	5	6	7	0	0
ANO5__chr11	27	16	30	5	4	4	14	30	12	16	1	2
ANO6__chr12	28	13	25	4	9	14	13	23	15	13	1	1
ANO7__chr2	3	2	4	1	1	2	1	3	0	0	0	1
ANO8__chr19	160	96	277	33	71	65	177	218	236	240	19	28
ANO9__chr11	2	0	0	0	0	1	0	0	0	0	0	0
ANP32A-IT1__chr15	10	7	9	0	2	1	3	6	5	7	1	0
ANP32A__chr15	1194	753	1230	171	439	405	793	1374	624	657	60	104
ANP32B__chr9	1132	620	905	143	347	426	523	1009	435	445	29	51
ANP32E__chr1	664	330	594	95	200	214	319	638	179	191	21	20
ANPEP__chr15	0	0	0	1	0	0	0	0	0	0	0	0
ANTXR1__chr2	103	66	108	22	37	45	63	162	55	60	3	5
ANTXR2__chr4	61	26	49	7	29	32	45	101	39	33	3	2
ANXA10__chr4	0	0	0	0	0	0	0	1	0	1	0	0
ANXA11__chr10	140	82	75	17	56	90	76	130	98	81	4	4
ANXA1__chr9	114	76	101	23	183	218	269	674	170	102	9	7
ANXA2P1__chr4	0	0	0	0	1	0	0	0	0	0	0	0
ANXA2P2__chr9	1	3	0	0	0	0	3	0	1	1	0	1
ANXA2P3__chr10	0	0	0	0	0	0	0	1	0	0	0	0
ANXA2R__chr5	8	2	3	0	2	0	3	4	5	4	0	0
ANXA2__chr15	1122	675	586	124	954	1189	1142	3275	711	451	39	63
ANXA3__chr4	41	20	15	6	37	47	31	61	18	13	1	2
ANXA4__chr2	17	10	12	1	14	21	19	35	16	22	0	0
ANXA5__chr4	1518	868	1209	341	1486	1623	1229	3209	1201	809	50	71
ANXA6__chr5	334	180	285	56	131	154	199	355	157	147	9	22
ANXA7__chr10	123	69	84	17	45	66	71	186	57	54	3	10
AOAH__chr7	1	2	2	0	0	0	2	2	0	0	0	0
AOC2__chr17	4	2	2	0	3	3	4	11	2	5	0	0
AOC3__chr17	1	0	0	0	0	2	1	2	0	0	0	0
AOC4__chr17	0	0	1	0	0	0	0	0	0	1	0	0
AOX1__chr2	1	0	2	0	0	0	0	1	0	2	0	0
AOX2P__chr2	0	0	0	0	0	0	1	0	0	0	0	0
AP1AR__chr4	70	48	105	22	41	42	60	122	89	114	7	15
AP1B1__chr22	194	109	228	24	115	93	189	309	197	196	11	36
AP1G1__chr16	560	310	668	99	270	288	554	942	525	468	35	71
AP1G2__chr14	48	18	33	5	1	11	15	35	37	31	0	8
AP1M1__chr19	728	456	747	114	280	311	532	1044	751	718	45	94
AP1M2__chr19	4	6	1	0	6	14	0	5	1	4	0	1
AP1S1__chr7	50	43	49	11	35	32	64	127	94	73	7	9
AP1S2__chrX	2821	1975	2212	337	1439	1876	1436	3267	2469	1911	128	241
AP1S3__chr2	13	12	15	4	20	5	36	51	16	6	2	2
AP2A1__chr19	0	1	9	0	0	2	2	3	5	4	0	1
AP2A2__chr11	287	166	365	37	138	130	257	549	337	324	13	52
AP2B1__chr17	214	96	212	32	115	119	305	483	260	244	19	35
AP2M1__chr3	896	487	849	111	437	401	702	1547	1072	651	45	118
AP2S1__chr19	988	702	929	149	425	476	688	1407	657	708	51	120
AP3B1__chr5	618	368	378	80	195	228	416	654	311	236	22	26
AP3B2__chr15	176	87	185	43	52	51	133	234	255	267	14	29
AP3D1__chr19	414	248	414	59	179	181	309	597	426	375	12	55
AP3M1__chr10	609	380	692	109	225	227	490	974	427	425	33	65
AP3M2__chr8	123	67	151	15	33	40	95	185	80	98	11	18
AP3S1__chr5	620	367	644	107	285	334	508	1046	568	544	32	82
AP3S2__chr15	0	1	0	0	0	0	0	0	0	0	0	0
AP4B1-AS1__chr1	0	0	0	0	0	1	0	0	1	1	0	0
AP4B1__chr1	338	164	341	45	157	115	285	638	300	280	32	49
AP4E1__chr15	31	15	28	2	7	11	13	38	18	29	0	1
AP4M1__chr7	9	4	9	2	6	3	10	25	9	9	2	1
AP4S1__chr14	61	36	55	10	30	32	28	75	41	41	4	6
AP5B1__chr11	55	26	36	4	13	14	20	58	38	25	5	9
AP5M1__chr14	58	25	73	10	17	24	49	101	42	33	5	7
AP5S1__chr20	30	8	38	6	13	13	17	49	42	29	2	3
AP5Z1__chr7	27	19	44	12	23	18	24	54	31	35	2	4
APAF1__chr12	0	1	2	0	3	1	1	2	0	1	1	0
APBA1__chr9	10	6	20	5	3	5	15	16	27	33	1	4
APBA2__chr15	150	82	155	16	39	31	84	140	188	165	15	26
APBA3__chr19	66	37	66	10	26	20	35	64	50	48	3	6
APBB1IP__chr10	0	0	0	0	0	0	0	0	0	1	0	0
APBB1__chr11	407	256	462	73	138	139	316	503	493	535	51	80
APBB2__chr4	326	162	360	57	76	62	173	299	187	181	10	18
APBB3__chr5	125	74	212	19	48	55	159	213	271	314	19	25
APC2__chr19	279	173	437	47	86	77	272	487	1040	855	53	103
APCDD1L-AS1__chr20	3	1	1	0	2	0	0	3	0	8	0	0
APCDD1__chr18	7	2	17	2	3	0	2	4	4	8	1	0
APC__chr5	123	82	249	31	54	40	133	249	257	249	14	45
APEH__chr3	131	80	152	22	62	60	88	191	127	74	6	19
APEX1__chr14	2490	1246	1731	249	642	663	1477	2669	1165	1156	78	140
APEX2__chrX	328	225	197	25	112	109	195	329	127	142	8	16
APH1A__chr1	223	111	193	23	82	74	135	275	145	150	6	25
APH1B__chr15	170	89	203	21	41	35	61	112	78	66	9	10
API5__chr11	906	473	790	126	344	429	615	1114	618	580	33	98
APIP__chr11	50	36	64	11	27	22	41	99	39	41	7	7
APITD1-CORT__chr1	1	3	3	0	0	2	1	6	1	0	1	0
APITD1__chr1	58	32	47	6	19	30	25	38	28	16	2	1
APLF__chr2	11	6	20	4	2	5	3	10	6	1	0	1
APLNR__chr11	0	0	3	0	0	0	1	1	0	0	0	0
APLN__chrX	40	30	14	6	16	42	22	74	21	12	0	4
APLP1__chr19	2443	1511	2903	501	1103	1021	2481	5361	6952	5638	328	660
APLP2__chr11	2159	1162	1686	381	924	984	1412	3527	1346	1251	82	160
APMAP__chr20	160	112	231	30	104	106	220	387	128	132	12	27
APOA1BP__chr1	265	166	204	44	83	97	167	334	149	151	9	21
APOA1__chr11	1	2	0	0	0	0	0	5	0	0	0	0
APOA2__chr1	0	0	0	0	0	0	0	1	0	0	0	0
APOBEC3A__chr22	0	0	0	0	0	0	0	0	0	1	0	0
APOBEC3C__chr22	135	80	54	12	36	61	54	124	45	42	3	3
APOBEC3D__chr22	0	2	1	0	0	0	0	0	1	0	0	0
APOBEC3F__chr22	35	15	18	2	6	7	25	23	13	11	1	2
APOBEC3G__chr22	0	0	0	0	0	0	0	0	0	0	2	0
APOBEC3H__chr22	0	0	0	0	1	0	0	2	0	0	0	0
APOBEC4__chr1	0	0	0	0	0	0	0	0	0	2	0	0
APOBR__chr16	0	0	0	0	0	0	1	1	0	1	0	0
APOB__chr2	0	0	0	0	0	0	0	0	1	2	0	0
APOC1P1__chr19	0	1	1	0	0	0	1	2	0	0	0	0
APOC1__chr19	10	13	4	0	3	6	2	5	2	1	0	0
APOE__chr19	19	5	14	1	8	9	5	8	39	19	0	2
APOF__chr12	0	0	0	0	1	1	0	3	0	1	0	0
APOL1__chr22	1	0	0	0	0	0	0	0	3	1	0	0
APOL2__chr22	33	12	29	0	5	8	10	36	16	9	0	0
APOL3__chr22	0	1	0	0	0	0	0	0	0	0	0	0
APOL4__chr22	19	10	32	3	4	3	10	30	21	25	1	3
APOL6__chr22	5	4	17	1	6	6	9	17	6	15	8	2
APOLD1__chr12	124	53	87	12	28	11	52	102	36	46	4	5
APOM__chr6	15	7	29	3	4	8	14	32	10	10	3	4
APOOL__chrX	216	126	260	31	54	74	148	241	145	164	11	9
APOO__chrX	395	235	374	58	173	150	293	521	238	257	19	39
APOPT1__chr14	69	41	78	11	45	29	60	117	90	73	7	10
APPBP2__chr17	391	248	554	80	154	154	354	571	392	353	29	79
APPL1__chr3	91	59	86	19	32	35	70	131	52	89	7	15
APPL2__chr12	318	161	454	55	58	74	163	313	263	209	17	36
APP__chr21	1591	1036	2365	283	581	500	1514	2984	1757	1628	123	278
APRT__chr16	214	160	180	35	128	111	201	428	141	128	14	19
APTX__chr9	87	39	82	9	36	31	80	134	69	55	2	7
AQP11__chr11	8	3	7	0	1	2	5	7	8	6	1	4
AQP1__chr7	1	0	0	0	0	0	0	1	5	1	0	0
AQP3__chr9	5	3	1	0	2	1	0	10	2	1	0	0
AQP4-AS1__chr18	0	2	0	0	0	0	0	1	2	7	0	0
AQP4__chr18	0	0	4	0	1	0	0	0	1	2	1	0
AQP5__chr12	1	1	2	0	1	1	0	1	0	0	1	0
AQP7P1__chr9	3	0	1	0	0	0	1	1	0	0	0	0
AQP7P3__chr9	33	5	33	6	13	13	12	45	27	38	1	4
AQP8__chr16	0	0	2	0	0	2	2	1	1	0	0	0
AQP9__chr15	0	0	0	0	0	0	0	0	1	0	0	0
AQPEP__chr5	0	0	0	0	0	0	0	1	2	1	0	0
AQR__chr15	58	26	37	6	19	20	37	67	30	23	2	5
ARAF__chrX	135	67	115	15	45	44	76	158	72	51	3	6
ARAP1__chr11	5	4	7	1	3	1	5	2	3	3	1	0
ARAP2__chr4	5	1	12	3	0	1	4	6	4	3	0	1
ARAP3__chr5	45	24	66	1	10	6	27	53	28	22	5	2
ARCN1__chr11	414	222	395	65	212	209	378	649	337	301	20	59
ARC__chr8	6	4	9	1	6	7	7	17	10	17	0	3
ARF1__chr1	1083	841	975	148	508	659	931	2049	877	1142	54	115
ARF3__chr12	739	409	716	95	270	311	645	1061	698	657	35	74
ARF4__chr3	766	518	796	129	442	528	764	1553	690	611	57	95
ARF5__chr7	261	123	252	21	77	99	189	366	259	247	25	38
ARF6__chr14	474	299	509	75	147	160	281	558	251	273	16	29
ARFGAP1__chr20	63	44	57	5	32	33	58	100	71	80	5	4
ARFGAP2__chr11	102	70	98	7	43	45	74	153	98	84	4	7
ARFGAP3__chr22	113	52	116	17	39	45	77	138	78	72	4	9
ARFGEF1__chr8	164	93	204	22	75	72	144	204	123	149	17	21
ARFGEF2__chr20	197	145	162	21	94	105	140	233	180	183	6	24
ARFIP1__chr4	442	349	534	75	217	212	353	596	315	310	10	29
ARFIP2__chr11	108	62	115	17	36	35	83	150	91	96	5	16
ARFRP1__chr20	52	27	28	4	21	20	37	73	44	37	2	4
ARG2__chr14	84	65	107	14	32	28	40	83	161	146	10	25
ARGFX__chr3	1	1	3	0	1	0	2	2	3	0	0	0
ARGLU1__chr13	317	215	390	46	69	89	147	294	207	185	17	37
ARHGAP10__chr4	3	4	2	1	5	6	4	12	6	5	0	1
ARHGAP11A__chr15	79	51	95	15	30	28	65	94	35	17	2	0
ARHGAP12__chr10	108	47	84	21	26	28	63	121	81	70	4	10
ARHGAP15__chr2	3	1	0	0	0	0	2	3	0	0	0	0
ARHGAP17__chr16	303	196	309	35	91	88	107	254	167	122	7	11
ARHGAP18__chr6	33	19	38	5	18	18	12	43	38	20	1	1
ARHGAP19-SLIT1__chr10	5	4	7	7	3	1	0	1	2	5	0	0
ARHGAP19__chr10	60	42	58	12	21	25	40	69	21	23	4	3
ARHGAP1__chr11	773	559	1017	115	294	337	640	1031	900	731	65	89
ARHGAP20__chr11	0	0	0	0	0	0	0	0	0	1	0	0
ARHGAP21__chr10	429	233	711	92	188	149	340	546	480	488	44	51
ARHGAP22__chr10	16	3	8	1	1	5	3	5	2	1	0	0
ARHGAP23__chr17	132	94	177	28	72	90	136	303	262	258	29	33
ARHGAP24__chr4	2	0	1	0	0	0	2	2	3	4	0	0
ARHGAP25__chr2	0	0	0	0	0	0	0	1	0	0	1	0
ARHGAP26__chr5	18	12	18	2	7	3	9	25	10	10	1	1
ARHGAP27__chr17	0	0	1	2	1	2	3	8	4	5	2	0
ARHGAP28__chr18	32	13	29	5	3	5	11	20	27	20	1	0
ARHGAP29__chr1	11	7	6	1	3	7	6	18	4	5	0	2
ARHGAP30__chr1	0	0	0	0	0	0	0	1	0	0	0	0
ARHGAP31__chr3	27	3	18	3	0	5	15	21	12	10	1	1
ARHGAP32__chr11	129	88	183	22	40	28	86	158	183	191	10	34
ARHGAP33__chr19	247	137	390	53	105	116	238	469	428	432	33	70
ARHGAP35__chr19	335	199	463	62	106	93	232	420	330	317	18	51
ARHGAP36__chrX	79	41	54	11	10	13	5	21	24	22	0	1
ARHGAP39__chr8	59	27	47	12	21	19	45	73	44	54	1	7
ARHGAP40__chr20	0	0	1	0	2	0	0	1	0	0	1	0
ARHGAP42__chr11	12	10	10	2	2	7	1	9	6	5	0	2
ARHGAP44__chr17	8	1	9	0	3	4	3	15	13	9	1	4
ARHGAP4__chrX	1	0	1	0	0	0	1	5	2	5	0	0
ARHGAP5-AS1__chr14	7	3	9	0	2	4	5	8	3	5	0	2
ARHGAP5__chr14	428	241	505	79	162	168	334	508	224	204	7	30
ARHGAP6__chrX	1	0	4	0	1	0	1	1	0	0	0	6
ARHGAP9__chr12	5	4	1	0	1	4	5	13	2	2	0	1
ARHGDIA__chr17	601	395	565	52	335	379	625	1379	571	450	43	61
ARHGDIB__chr12	15	8	14	1	23	30	27	53	22	24	0	5
ARHGDIG__chr16	3	0	5	0	3	1	3	5	7	8	0	1
ARHGEF10L__chr1	81	44	82	10	13	12	37	90	88	70	3	9
ARHGEF10__chr8	68	39	72	8	21	15	31	55	23	26	0	5
ARHGEF11__chr1	12	5	17	1	8	5	5	15	14	17	1	3
ARHGEF12__chr11	85	43	115	15	28	49	61	106	142	133	7	19
ARHGEF15__chr17	0	0	0	0	0	0	0	0	0	0	1	0
ARHGEF16__chr1	3	1	3	0	3	2	3	2	1	3	0	0
ARHGEF17__chr11	56	38	49	4	18	9	28	47	21	26	1	4
ARHGEF18__chr19	77	48	111	8	27	28	91	147	90	94	10	9
ARHGEF19__chr1	3	4	1	0	3	3	2	5	1	5	0	0
ARHGEF1__chr19	27	8	36	5	17	12	18	41	13	17	5	0
ARHGEF25__chr12	0	2	3	0	0	0	3	1	4	2	0	1
ARHGEF26-AS1__chr3	3	1	9	1	0	1	9	5	5	12	4	1
ARHGEF26__chr3	36	12	47	10	4	2	19	38	4	15	0	4
ARHGEF28__chr5	0	0	2	0	2	1	4	3	1	1	0	0
ARHGEF2__chr1	202	148	315	30	71	90	289	511	356	322	15	59
ARHGEF33__chr2	0	1	2	0	0	0	1	1	0	1	1	0
ARHGEF35__chr7	0	0	0	0	0	1	0	1	1	0	0	0
ARHGEF37__chr5	1	2	3	2	2	2	8	5	5	5	1	3
ARHGEF38__chr4	0	0	1	0	0	0	0	1	0	0	0	0
ARHGEF39__chr9	23	6	19	4	5	4	9	13	5	8	0	0
ARHGEF3__chr3	27	12	23	5	13	5	18	23	19	16	1	4
ARHGEF40__chr14	410	254	390	54	133	123	199	399	224	148	11	13
ARHGEF4__chr2	13	9	29	3	7	3	21	44	22	36	0	7
ARHGEF5__chr7	0	0	0	0	0	0	0	1	0	0	0	0
ARHGEF6__chrX	70	43	65	14	9	9	28	40	16	12	1	1
ARHGEF7__chr13	157	105	217	24	74	62	158	269	225	234	9	29
ARHGEF9__chrX	78	35	92	12	29	29	68	110	90	124	10	25
ARID1A__chr1	613	367	946	89	140	186	405	730	525	738	31	58
ARID1B__chr6	157	105	260	30	54	65	137	273	254	250	15	38
ARID2__chr12	290	177	408	57	97	128	195	384	172	234	27	49
ARID3A__chr19	42	14	13	2	14	19	9	26	28	19	0	7
ARID3B__chr15	152	81	68	7	57	56	53	101	94	101	2	7
ARID3C__chr9	1	0	1	0	0	0	1	0	0	0	0	0
ARID4A__chr14	35	13	36	7	13	8	30	54	39	48	3	2
ARID4B__chr1	136	95	215	31	63	57	156	243	156	169	12	24
ARID5A__chr2	6	1	10	3	2	2	4	5	13	8	1	2
ARID5B__chr10	98	45	150	29	67	78	126	297	82	94	6	9
ARIH1__chr15	141	91	141	22	45	49	110	175	149	136	12	20
ARIH2OS__chr3	4	2	5	0	1	0	5	4	3	5	0	1
ARIH2__chr3	108	63	118	16	27	48	64	120	91	66	8	10
ARL10__chr5	1	0	1	0	1	1	0	8	3	4	0	1
ARL11__chr13	1	0	2	0	2	0	2	4	0	2	0	0
ARL13B__chr3	42	26	40	14	13	18	17	47	27	34	2	4
ARL14EPL__chr5	0	0	0	0	0	0	0	0	0	1	1	0
ARL14EP__chr11	9	10	25	1	17	12	18	46	17	18	0	1
ARL14__chr3	0	1	0	0	0	0	4	7	0	0	0	0
ARL15__chr5	5	2	6	0	1	4	6	10	7	6	3	2
ARL16__chr17	40	36	58	2	26	24	41	81	42	59	4	10
ARL1__chr12	126	61	110	9	43	54	94	171	72	62	8	9
ARL2BP__chr16	505	362	625	107	252	314	410	840	567	481	43	93
ARL2__chr11	285	236	309	34	193	150	297	504	301	245	22	37
ARL3__chr10	1988	1106	2056	286	696	680	1490	2596	1771	1529	149	281
ARL4A__chr7	135	63	64	10	35	40	40	80	42	36	5	9
ARL4C__chr2	657	377	583	112	123	139	311	632	510	429	47	91
ARL4D__chr17	275	137	670	112	116	97	528	792	353	406	27	57
ARL5A__chr2	100	70	134	24	51	43	80	155	76	74	11	11
ARL5B__chr10	27	11	19	2	17	16	12	28	7	14	0	2
ARL6IP1__chr16	1493	832	1199	220	556	559	902	1849	854	651	43	111
ARL6IP4__chr12	361	203	275	42	174	151	250	536	252	203	12	40
ARL6IP5__chr3	342	227	457	58	196	191	297	583	391	375	38	53
ARL6IP6__chr2	104	56	124	23	35	44	63	113	71	57	4	5
ARL6__chr3	2	3	15	0	7	5	15	15	5	8	2	1
ARL8A__chr1	297	172	559	60	145	140	400	641	501	450	38	63
ARL8B__chr3	154	105	167	39	97	120	174	356	145	170	11	21
ARL9__chr4	5	1	10	4	6	4	11	1	5	2	0	0
ARMC10__chr7	89	58	76	9	60	70	86	159	58	65	8	6
ARMC12__chr6	2	0	4	0	0	0	2	3	2	1	0	0
ARMC1__chr8	134	76	182	25	63	52	124	174	120	120	6	16
ARMC2__chr6	5	2	0	0	0	0	0	3	2	4	0	0
ARMC3__chr10	0	0	0	0	0	0	1	0	0	0	0	0
ARMC4__chr10	11	4	8	0	1	2	1	5	3	0	0	1
ARMC5__chr16	31	9	34	5	16	16	24	49	38	29	0	2
ARMC6__chr19	141	81	104	10	56	44	84	165	121	89	4	19
ARMC7__chr17	7	9	7	2	4	3	11	18	14	10	1	4
ARMC8__chr3	185	97	168	28	62	60	113	195	109	128	13	9
ARMC9__chr2	30	29	28	1	13	11	20	33	14	14	1	2
ARMCX1__chrX	47	21	65	10	25	26	49	107	60	56	3	8
ARMCX2__chrX	328	199	348	47	152	163	257	499	212	170	10	26
ARMCX3__chrX	191	126	251	35	103	106	214	318	210	235	13	27
ARMCX4__chrX	58	27	73	11	28	21	44	68	34	22	5	6
ARMCX5-GPRASP2__chrX	1	2	1	0	0	1	0	3	1	1	0	0
ARMCX5__chrX	66	46	87	13	25	38	67	116	88	64	6	9
ARMCX6__chrX	308	217	378	42	124	159	260	459	232	225	19	33
ARMS2__chr10	0	0	0	0	0	0	0	2	0	0	0	0
ARNT2__chr15	193	107	303	58	66	52	234	357	240	239	16	29
ARNTL2__chr12	71	32	41	10	24	35	34	92	38	34	2	2
ARNTL__chr11	23	4	55	2	10	7	16	27	20	10	0	4
ARNT__chr1	46	18	37	3	13	15	30	52	41	31	4	2
ARPC1A__chr7	738	466	717	122	327	302	569	1273	698	708	46	103
ARPC1B__chr7	15	11	6	1	3	15	4	13	11	6	0	1
ARPC2__chr2	3272	2389	3972	572	1541	2209	2879	6794	3035	3106	259	414
ARPC3__chr12	84	74	99	26	45	59	101	202	86	108	19	21
ARPC4__chr3	930	671	878	126	435	597	695	1474	914	708	61	103
ARPC5L__chr9	197	85	138	24	67	78	115	277	106	105	10	20
ARPC5__chr1	715	450	836	107	402	455	600	1064	600	549	44	81
ARPP19__chr15	753	435	681	93	324	345	435	838	589	481	39	80
ARPP21__chr3	4	1	15	0	1	1	8	8	17	25	4	5
ARRB1__chr11	20	13	20	2	8	7	9	18	30	28	1	1
ARRB2__chr17	175	105	127	28	63	74	134	185	118	158	4	29
ARRDC1__chr9	34	13	27	6	13	18	26	40	21	25	1	3
ARRDC2__chr19	0	0	0	0	0	0	0	3	0	0	0	0
ARRDC3-AS1__chr5	2	2	3	0	6	1	5	7	1	8	4	6
ARRDC3__chr5	180	121	230	28	194	244	455	748	282	354	27	33
ARRDC4__chr15	11	3	29	3	4	4	22	23	18	22	1	1
ARRDC5__chr19	0	1	0	0	1	0	0	1	0	0	0	0
ARSA__chr22	17	13	21	2	2	8	8	12	25	23	0	3
ARSB__chr5	33	18	36	11	13	14	31	64	19	14	3	1
ARSD__chrX	51	24	72	9	13	23	22	72	38	26	6	2
ARSE__chrX	1	0	1	0	0	0	0	1	1	0	0	0
ARSG__chr17	5	1	0	1	3	2	6	9	2	2	0	0
ARSI__chr5	6	0	0	0	0	3	4	2	4	1	0	0
ARSJ__chr4	8	3	4	0	6	5	9	18	2	3	0	0
ARSK__chr5	8	10	8	4	5	4	0	11	7	5	1	3
ART3__chr4	0	0	0	0	0	0	0	1	0	1	0	0
ART5__chr11	7	2	4	0	1	1	3	1	2	2	0	0
ARTN__chr1	1	0	2	0	1	0	3	5	2	0	0	0
ARV1__chr1	187	133	212	40	87	107	175	451	190	184	9	38
ARVCF__chr22	29	11	29	4	9	14	24	64	47	27	0	4
ARX__chrX	63	41	207	37	19	16	136	233	108	157	17	29
AR__chrX	57	44	65	9	25	20	45	94	25	15	1	4
AS3MT__chr10	0	0	0	0	0	0	1	0	0	0	0	0
ASAH1__chr8	408	225	422	56	181	231	395	749	391	342	22	67
ASAP1-IT1__chr8	0	0	1	0	0	0	4	1	0	0	0	1
ASAP1__chr8	417	204	426	61	138	150	253	420	199	199	14	26
ASAP2__chr2	65	43	103	15	24	28	58	91	67	54	11	11
ASAP3__chr1	44	24	37	4	6	17	18	37	21	21	1	3
ASB11__chrX	2	1	3	1	0	0	0	2	5	4	0	2
ASB12__chrX	4	3	10	0	1	2	1	6	13	3	0	0
ASB13__chr10	34	27	34	4	9	4	8	11	21	18	0	2
ASB15__chr7	0	0	0	0	0	1	0	2	1	0	3	1
ASB16-AS1__chr17	48	49	53	6	16	19	30	35	21	32	4	2
ASB16__chr17	0	0	0	0	1	2	0	0	0	0	0	0
ASB1__chr2	123	77	137	13	82	79	125	256	109	85	5	14
ASB2__chr14	1	0	0	0	0	0	0	0	0	0	0	0
ASB3__chr2	104	57	86	17	35	45	79	135	77	78	7	11
ASB4__chr7	10	6	9	0	1	3	9	22	9	19	6	0
ASB6__chr9	46	30	48	5	24	19	25	62	41	40	2	6
ASB7__chr15	40	22	46	9	16	27	28	59	23	36	2	1
ASB8__chr12	83	40	100	11	24	30	55	104	96	116	7	14
ASB9P1__chr15	0	0	0	0	0	0	0	2	0	0	0	0
ASB9__chrX	0	0	0	0	0	0	0	0	1	0	0	0
ASCC1__chr10	205	132	212	33	75	103	126	240	192	147	7	29
ASCC2__chr22	151	85	178	36	84	77	142	248	132	137	2	23
ASCC3__chr6	174	109	182	32	131	112	186	343	115	100	9	17
ASCL1__chr12	289	140	419	72	114	89	410	652	179	195	11	15
ASCL2__chr11	1	1	1	0	0	0	0	3	0	0	0	0
ASF1A__chr6	254	115	263	45	105	132	230	417	200	184	13	19
ASF1B__chr19	598	365	469	94	194	157	220	428	114	123	8	9
ASGR1__chr17	15	20	31	5	7	12	16	29	24	33	2	7
ASH1L-AS1__chr1	20	15	21	5	5	25	27	33	21	21	3	0
ASH1L__chr1	76	41	103	11	18	33	61	93	95	86	7	11
ASH2L__chr8	282	147	267	43	99	93	170	354	186	152	21	35
ASIC1__chr12	22	19	47	1	9	9	28	61	42	54	3	9
ASIC2__chr17	2	1	11	0	0	0	2	3	2	2	0	2
ASIC3__chr7	4	3	8	0	0	3	1	6	9	13	0	1
ASIC4__chr2	0	0	0	0	0	0	0	0	3	2	0	0
ASIP__chr20	2	0	0	0	0	1	0	0	0	1	0	0
ASL__chr7	18	12	22	0	5	4	18	33	10	8	0	1
ASNA1__chr19	575	348	632	60	204	211	473	846	414	367	38	62
ASNSD1__chr2	87	47	67	17	37	26	70	99	71	55	7	3
ASNS__chr7	145	72	144	23	112	109	195	483	243	224	21	54
ASPDH__chr19	0	0	0	0	0	0	0	0	1	1	0	0
ASPHD1__chr16	3	6	12	2	5	4	15	13	10	19	2	4
ASPHD2__chr22	39	13	48	6	16	18	18	32	59	40	2	9
ASPH__chr8	268	171	334	44	119	90	220	337	163	151	10	19
ASPM__chr1	164	92	176	35	45	54	70	120	45	41	5	3
ASPRV1__chr2	4	2	1	0	0	4	3	6	3	3	0	2
ASPSCR1__chr17	30	29	33	7	10	9	19	55	26	7	1	1
ASRGL1__chr11	196	124	255	29	52	85	127	276	138	158	11	16
ASS1__chr9	139	64	66	13	24	30	29	73	43	32	3	4
ASTE1__chr3	2	1	7	3	2	1	3	14	0	5	0	0
ASTN1__chr1	243	163	335	41	63	48	149	203	295	305	26	44
ASTN2__chr9	25	4	26	0	3	8	17	42	27	43	9	3
ASUN__chr12	41	28	47	9	13	25	33	75	32	32	3	10
ASXL1__chr20	262	159	229	51	71	62	139	225	164	201	12	22
ASXL2__chr2	6	4	19	5	2	2	8	19	3	7	0	2
ASXL3__chr18	9	8	23	0	11	12	14	31	31	27	1	5
ASZ1__chr7	0	1	2	0	0	1	0	1	1	3	0	0
ATAD1__chr10	239	152	275	35	139	196	285	513	282	334	26	59
ATAD2B__chr2	27	22	38	7	11	15	38	47	32	47	2	4
ATAD2__chr8	228	109	187	32	60	67	108	215	41	38	10	6
ATAD3A__chr1	36	24	31	6	15	14	28	39	18	12	3	2
ATAD3B__chr1	5	7	12	2	2	6	4	11	1	5	2	0
ATAD3C__chr1	6	2	11	1	4	4	8	18	5	5	0	0
ATAD5__chr17	18	9	8	3	6	6	11	18	10	11	1	2
ATAT1__chr6	490	310	902	101	171	167	540	934	1071	957	84	141
ATCAY__chr19	91	53	201	31	40	30	153	266	362	363	19	61
ATE1__chr10	8	3	4	3	2	1	7	4	1	2	0	0
ATF1__chr12	42	54	61	11	16	21	32	73	41	30	3	4
ATF2__chr2	319	179	338	51	114	86	167	290	338	237	29	51
ATF3__chr1	142	64	53	10	136	181	57	161	96	77	2	7
ATF4__chr22	742	447	693	91	342	399	589	1406	660	599	51	115
ATF5__chr19	83	73	128	9	53	47	98	174	98	90	9	11
ATF6B__chr6	23	11	20	4	14	5	26	39	14	18	1	4
ATF6__chr1	258	123	231	36	95	85	158	336	179	152	12	41
ATF7IP2__chr16	20	8	24	3	4	9	7	20	10	6	1	0
ATF7IP__chr12	124	71	117	18	41	40	93	162	111	106	9	13
ATF7__chr12	44	32	52	7	17	22	23	64	39	36	1	2
ATG10__chr5	37	15	22	1	7	6	16	38	22	31	0	2
ATG12__chr5	149	115	158	37	94	76	142	254	138	134	7	34
ATG13__chr11	225	143	209	25	82	102	136	266	217	175	16	27
ATG14__chr14	179	94	188	28	63	55	119	199	113	156	8	18
ATG16L1__chr2	102	46	92	18	36	32	50	148	65	54	6	14
ATG16L2__chr11	6	1	9	0	2	0	1	3	5	2	1	4
ATG2A__chr11	28	19	48	4	9	10	21	38	17	27	1	5
ATG2B__chr14	47	27	72	5	13	17	35	78	64	38	4	10
ATG3__chr3	258	194	359	62	87	156	270	475	206	264	25	53
ATG4A__chrX	40	37	67	6	24	26	47	90	65	56	6	3
ATG4B__chr2	213	121	186	32	70	60	111	221	154	163	9	14
ATG4C__chr1	189	124	146	25	56	68	125	200	82	84	7	10
ATG4D__chr19	0	2	6	0	2	1	1	4	3	6	0	2
ATG5__chr6	56	42	54	10	35	28	26	93	48	36	4	5
ATG7__chr3	10	9	6	1	7	4	11	24	4	7	0	1
ATG9A__chr2	97	56	93	10	52	44	77	139	93	88	9	18
ATG9B__chr7	4	0	2	1	1	0	2	0	1	4	0	0
ATHL1__chr11	4	2	5	1	0	1	1	4	2	1	0	0
ATIC__chr2	182	123	153	14	58	80	95	192	83	64	5	10
ATL1__chr14	60	48	55	10	25	30	60	100	84	81	9	13
ATL2__chr2	39	19	33	2	4	13	11	31	18	18	0	3
ATL3__chr11	10	5	20	1	10	7	13	48	8	7	0	0
ATMIN__chr16	262	138	246	35	80	96	195	361	212	212	20	25
ATM__chr11	105	60	105	22	30	29	56	111	49	54	6	13
ATN1__chr12	563	250	769	107	166	153	342	816	505	475	30	74
ATOH7__chr10	3	0	3	0	1	2	1	4	0	2	0	0
ATOH8__chr2	15	5	13	4	0	4	14	13	7	2	0	1
ATOX1__chr5	138	104	157	27	86	81	129	259	155	141	15	15
ATP10A__chr15	15	9	8	1	5	3	3	7	2	4	0	0
ATP10B__chr5	0	0	2	0	0	0	0	2	0	1	1	0
ATP10D__chr4	40	20	34	8	6	11	18	39	14	13	0	3
ATP11A__chr13	96	64	94	14	39	37	62	111	65	50	4	2
ATP11B__chr3	23	13	24	3	14	11	17	37	19	34	1	1
ATP11C__chrX	83	48	91	16	41	47	55	120	76	76	4	11
ATP13A1__chr19	35	20	35	9	13	25	26	75	32	42	1	4
ATP13A2__chr1	485	305	488	72	186	168	420	674	694	714	65	83
ATP13A3__chr3	277	129	249	44	147	133	205	400	231	179	9	27
ATP13A4__chr3	2	0	0	0	0	0	0	0	2	0	0	0
ATP1A1OS__chr1	2	4	6	0	0	2	2	4	4	4	0	0
ATP1A1__chr1	167	113	197	28	103	98	154	286	140	118	10	24
ATP1A2__chr1	8	3	47	2	1	1	4	2	1	1	0	0
ATP1A3__chr19	64	36	113	22	37	31	97	188	305	325	25	35
ATP1B1__chr1	120	71	192	25	48	74	112	250	173	167	11	28
ATP1B2__chr17	300	146	631	97	62	62	261	457	280	307	14	41
ATP1B3__chr3	1199	704	925	154	630	688	811	1596	731	648	57	84
ATP1B4__chrX	0	0	0	1	0	0	0	0	0	0	0	0
ATP2A1__chr16	13	13	16	2	5	10	4	15	2	12	0	0
ATP2A2__chr12	714	372	705	86	303	286	511	1006	644	560	36	72
ATP2A3__chr17	1	0	0	0	0	1	0	0	0	0	0	0
ATP2B1__chr12	68	45	103	10	25	29	70	112	66	72	5	10
ATP2B2__chr3	1	0	10	4	0	0	5	7	13	8	2	2
ATP2B3__chrX	0	0	2	0	0	0	0	1	5	6	0	2
ATP2B4__chr1	326	263	397	67	105	97	263	354	249	197	11	28
ATP2C1__chr3	290	153	266	33	118	129	240	303	258	200	31	39
ATP2C2__chr16	0	0	0	0	0	0	0	0	0	1	0	0
ATP4B__chr13	0	0	0	0	0	0	0	1	0	1	0	0
ATP5A1__chr18	2033	1204	1975	294	770	861	1577	2622	1680	1607	122	215
ATP5B__chr12	1916	1220	1869	290	998	935	1888	3639	1562	1549	156	255
ATP5C1__chr10	946	506	980	165	438	516	811	1384	816	851	68	106
ATP5D__chr19	287	175	260	23	103	129	222	423	263	219	27	24
ATP5EP2__chr13	531	307	412	67	237	283	365	636	484	395	28	52
ATP5E__chr20	249	125	158	54	92	109	83	526	300	241	9	40
ATP5F1__chr1	507	272	502	72	233	256	415	808	366	350	35	53
ATP5G1__chr17	863	497	804	128	397	425	740	1370	542	480	56	96
ATP5G2__chr12	5458	3089	4365	607	2148	1784	3786	6991	3193	3223	248	391
ATP5G3__chr2	1510	958	1420	209	737	758	1176	2393	1052	1027	94	140
ATP5H__chr17	670	448	685	116	317	338	590	1111	488	453	51	79
ATP5I__chr4	508	355	586	92	220	239	444	838	367	365	56	64
ATP5J2-PTCD1__chr7	23	15	43	1	8	13	21	49	16	15	1	1
ATP5J2__chr7	3630	2015	3381	412	1368	1400	2341	4599	2191	1765	192	279
ATP5J__chr21	3584	2055	3681	532	1679	1846	3082	5578	2915	2644	309	419
ATP5L2__chr22	0	1	0	0	0	1	1	0	2	4	1	0
ATP5L__chr11	1221	734	1226	188	577	608	1030	1815	980	906	96	177
ATP5O__chr21	1148	646	1082	149	472	515	962	1692	1055	893	79	146
ATP5SL__chr19	1870	1417	2108	262	805	1044	1537	3294	1493	1764	90	194
ATP5S__chr14	70	30	85	9	16	23	64	80	33	57	2	7
ATP6AP1L__chr5	21	2	7	0	1	2	2	4	4	4	0	0
ATP6AP1__chrX	291	145	354	43	167	130	352	564	389	399	35	49
ATP6AP2__chrX	1104	648	1263	193	548	605	1113	1772	1053	982	55	151
ATP6V0A1__chr17	253	188	361	39	232	196	381	709	608	537	52	85
ATP6V0A2__chr12	83	43	86	11	25	29	67	108	44	37	4	8
ATP6V0B__chr1	629	365	741	90	396	407	654	1191	859	760	53	143
ATP6V0CP3__chr6	1	0	0	0	0	0	0	0	0	0	0	0
ATP6V0C__chr16	2078	1093	2351	299	1049	1258	2102	4438	2883	2521	196	369
ATP6V0D1__chr16	360	227	424	65	123	188	354	688	437	484	38	64
ATP6V0D2__chr8	0	1	0	0	0	0	0	0	0	4	3	0
ATP6V0E1__chr5	397	268	452	61	305	281	384	847	377	298	26	41
ATP6V0E2-AS1__chr7	23	17	15	3	4	3	20	39	39	39	2	3
ATP6V0E2__chr7	258	135	247	31	129	87	224	414	397	342	18	47
ATP6V1A__chr3	1021	618	1186	189	403	440	824	1606	1480	1307	105	195
ATP6V1B1__chr2	21	9	12	1	1	2	3	19	10	28	0	1
ATP6V1B2__chr8	466	263	568	82	246	234	519	904	777	571	40	106
ATP6V1C1__chr8	96	74	105	12	43	38	107	189	92	87	13	18
ATP6V1C2__chr2	0	0	0	0	0	0	0	2	0	1	0	0
ATP6V1D__chr14	297	173	316	53	159	194	307	567	351	287	14	51
ATP6V1E1__chr22	272	176	293	43	241	202	416	631	361	351	28	61
ATP6V1E2__chr2	4	2	3	0	2	3	4	6	1	3	0	0
ATP6V1F__chr7	1372	846	1313	192	566	547	1120	2147	1832	1544	154	238
ATP6V1G1__chr9	642	439	884	136	329	365	621	1140	711	742	63	120
ATP6V1G2__chr6	268	151	477	64	151	175	362	610	768	839	59	87
ATP6V1H__chr8	133	94	174	30	85	95	172	246	205	176	16	24
ATP7A__chrX	38	15	23	5	12	7	19	32	29	30	1	2
ATP7B__chr13	74	29	71	10	6	24	58	114	65	72	3	9
ATP8A1__chr4	39	26	62	6	14	8	33	56	88	65	8	12
ATP8A2__chr13	8	3	5	1	4	3	4	1	13	5	2	0
ATP8B1__chr18	0	0	2	0	0	0	0	0	1	3	0	0
ATP8B2__chr1	17	9	26	5	7	8	7	26	11	17	0	0
ATP8B4__chr15	0	1	0	0	0	0	1	0	0	0	0	0
ATP8B5P__chr9	0	0	0	0	0	0	2	0	0	0	0	0
ATP9A__chr20	503	337	724	74	194	175	443	758	1092	1195	82	184
ATP9B__chr18	47	35	59	11	20	15	44	74	31	35	1	1
ATPAF1__chr1	422	227	405	77	144	124	323	552	242	212	20	45
ATPAF2__chr17	148	97	159	17	76	60	120	356	117	107	4	12
ATPBD4-AS1__chr15	0	0	0	2	0	0	1	0	0	1	0	0
ATPBD4__chr15	34	39	35	10	12	23	30	64	15	21	0	0
ATPIF1__chr1	1160	692	1215	182	471	507	948	1756	790	680	76	136
ATRAID__chr2	553	338	447	73	191	229	342	694	271	277	9	33
ATRIP__chr3	11	6	9	0	4	2	3	18	7	6	0	2
ATRNL1__chr10	86	49	133	14	22	22	63	122	101	102	15	12
ATRN__chr20	71	39	126	24	26	13	106	153	80	78	8	8
ATRX__chrX	675	434	918	132	191	214	471	770	854	830	64	160
ATR__chr3	23	26	29	4	13	11	21	34	13	12	0	2
ATXN10__chr22	496	310	597	115	202	210	484	850	486	549	47	114
ATXN1L__chr16	60	43	72	5	29	32	48	87	39	41	2	7
ATXN1__chr6	31	19	86	10	13	8	43	70	60	80	3	27
ATXN2L__chr16	41	31	43	9	15	20	34	69	47	42	0	7
ATXN2__chr12	324	157	321	51	86	93	165	298	260	221	20	29
ATXN3L__chrX	0	0	0	0	0	0	0	0	0	0	1	0
ATXN3__chr14	112	64	98	12	48	34	55	120	105	88	10	7
ATXN7L1__chr7	27	16	33	3	5	4	38	38	25	34	1	9
ATXN7L2__chr1	28	12	19	5	4	9	14	18	15	19	2	3
ATXN7L3B__chr12	462	259	515	68	164	174	416	789	611	616	47	90
ATXN7L3__chr17	355	232	383	67	141	195	308	630	603	603	29	99
ATXN7__chr3	23	17	51	3	6	10	15	28	11	26	0	1
AUH__chr9	48	12	37	5	16	12	20	37	41	17	2	4
AUNIP__chr1	29	22	19	4	4	9	7	24	9	3	0	3
AUP1__chr2	967	647	1184	169	388	490	788	1500	698	599	45	79
AURKAIP1__chr1	349	232	338	40	149	147	263	529	230	212	20	33
AURKAPS1__chr1	0	0	0	1	0	0	0	1	0	0	0	0
AURKA__chr20	437	244	251	42	117	116	134	257	98	69	6	13
AURKB__chr17	1864	1177	1381	251	448	395	586	1223	278	401	24	39
AURKC__chr19	0	2	1	1	2	2	0	3	3	3	0	0
AUTS2__chr7	570	386	992	159	136	158	477	705	971	1118	100	161
AVEN__chr15	26	21	40	10	16	18	25	61	16	13	2	1
AVIL__chr12	4	0	4	1	1	3	3	7	2	3	0	0
AVL9__chr7	3	2	6	1	4	3	2	5	7	0	1	0
AVPI1__chr10	15	12	13	1	2	5	15	16	12	6	0	0
AVPR1A__chr12	0	0	0	1	0	0	1	2	0	1	0	0
AXDND1__chr1	0	0	1	0	0	0	0	2	1	1	0	0
AXIN1__chr16	95	73	85	14	41	26	57	124	80	78	3	7
AXIN2__chr17	32	20	62	11	7	7	24	65	36	39	5	7
AXL__chr19	243	145	170	31	171	223	180	321	133	70	5	10
AZI1__chr17	49	31	50	3	10	6	19	59	26	34	2	3
AZI2__chr3	61	40	73	11	32	39	63	108	69	61	3	15
AZIN1__chr8	355	204	345	51	160	189	276	529	280	296	23	33
AZU1__chr19	0	1	2	0	1	2	2	2	4	4	0	1
B2M__chr15	328	176	219	35	197	215	271	590	225	175	7	17
B3GALNT1__chr3	16	11	30	2	8	9	42	80	25	17	6	8
B3GALNT2__chr1	219	126	199	28	73	92	91	231	96	90	3	16
B3GALT1__chr2	0	1	0	0	0	0	0	1	0	0	0	0
B3GALT2__chr1	6	2	8	2	3	2	2	5	24	20	5	2
B3GALT4__chr6	4	3	4	1	0	1	3	5	5	3	0	0
B3GALT6__chr1	410	256	386	65	143	177	305	629	355	335	33	65
B3GALTL__chr13	41	19	37	7	9	22	19	62	13	6	1	2
B3GAT1__chr11	158	117	290	42	66	71	174	217	258	229	13	34
B3GAT3__chr11	61	35	50	9	32	27	51	88	35	32	3	6
B3GNT1__chr11	96	43	99	15	25	27	64	133	74	90	5	12
B3GNT2__chr2	9	5	8	0	4	6	6	11	3	8	0	1
B3GNT3__chr19	0	1	0	0	0	0	0	1	0	2	1	0
B3GNT4__chr12	0	1	0	0	2	0	3	1	2	1	0	0
B3GNT5__chr3	59	33	44	9	17	16	25	45	38	18	5	2
B3GNT6__chr11	0	0	1	0	0	1	0	1	0	1	0	0
B3GNT7__chr2	9	4	14	3	9	2	5	8	10	6	2	2
B3GNT9__chr16	0	0	0	0	0	0	0	1	0	0	0	0
B3GNTL1__chr17	17	2	10	0	4	4	6	17	6	7	0	0
B4GALNT1__chr12	8	4	8	0	2	3	9	9	13	11	0	3
B4GALNT4__chr11	378	177	382	48	78	70	172	342	307	295	23	51
B4GALT1__chr9	118	77	65	18	74	106	58	135	92	50	4	2
B4GALT2__chr1	182	108	186	32	64	74	145	283	156	141	8	25
B4GALT3__chr1	103	49	105	19	43	56	82	130	100	83	11	12
B4GALT4__chr3	38	22	27	9	21	14	20	62	27	30	2	1
B4GALT5__chr20	380	194	238	47	175	194	176	338	363	345	14	36
B4GALT6__chr18	68	41	49	8	15	20	17	43	38	15	0	4
B4GALT7__chr5	70	36	50	15	27	32	42	108	42	53	0	6
B9D1__chr17	39	19	58	7	11	9	40	92	23	22	6	3
B9D2__chr19	29	13	27	8	10	9	33	34	14	18	2	3
BAALC__chr8	27	23	178	21	9	9	49	102	32	29	3	8
BAAT__chr9	6	1	3	0	0	3	1	7	4	7	2	0
BABAM1__chr19	416	246	377	27	164	190	241	495	259	219	20	25
BACE1-AS__chr11	0	0	1	0	0	0	0	0	0	1	0	0
BACE1__chr11	83	56	96	15	28	33	70	114	96	85	5	12
BACE2__chr21	12	12	13	3	2	6	13	23	11	14	0	0
BACH1__chr21	68	41	91	16	17	23	50	107	93	76	6	9
BACH2__chr6	64	35	129	22	15	29	61	133	170	182	9	36
BAD__chr11	153	75	183	20	63	62	138	259	165	140	15	19
BAG1__chr9	214	135	245	31	75	79	174	323	171	154	14	22
BAG2__chr6	144	78	79	14	36	36	59	122	40	25	4	9
BAG3__chr10	47	32	48	10	39	35	36	79	24	26	0	1
BAG4__chr8	42	32	50	9	14	11	33	71	38	26	1	3
BAG5__chr14	254	184	281	37	104	87	186	352	203	178	20	22
BAG6__chr6	515	327	566	64	198	230	482	726	570	528	36	83
BAGE__chr21	0	0	0	0	0	0	0	0	0	1	0	0
BAHCC1__chr17	100	51	139	21	33	36	92	111	186	149	10	29
BAHD1__chr15	160	94	175	14	55	56	102	215	139	139	9	15
BAI1__chr8	34	8	30	2	8	5	19	19	23	15	2	4
BAI2__chr1	59	29	90	11	18	15	47	92	59	56	4	8
BAI3__chr6	11	7	31	9	0	6	13	30	15	22	1	2
BAIAP2-AS1__chr17	52	27	49	7	12	13	24	44	36	38	7	11
BAIAP2L1__chr7	19	8	5	1	3	7	0	3	4	3	1	0
BAIAP2L2__chr22	4	0	5	0	0	1	4	3	3	0	0	1
BAIAP2__chr17	335	194	384	48	130	123	272	541	366	354	18	34
BAIAP3__chr16	4	0	2	4	0	0	1	9	8	7	0	1
BAK1__chr6	38	28	26	1	22	24	33	51	23	23	0	2
BAMBI__chr10	4	2	8	3	0	5	9	13	0	5	0	0
BANCR__chr9	1	0	4	0	1	1	3	3	4	4	0	1
BANF1__chr11	2691	1757	2557	344	794	992	1459	2903	1270	1191	106	177
BANK1__chr4	0	2	1	0	0	0	0	1	0	0	0	0
BANP__chr16	47	22	45	2	22	15	48	64	43	42	1	12
BAP1__chr3	102	59	112	22	32	40	100	162	113	103	6	10
BARD1__chr2	18	23	42	5	9	6	12	20	6	5	0	0
BARHL2__chr1	0	0	0	0	0	0	0	0	0	3	0	0
BARX1__chr9	0	0	4	0	0	1	0	0	0	0	0	0
BARX2__chr11	0	1	0	0	0	0	0	0	0	0	0	0
BASP1__chr5	782	383	1353	222	371	318	963	1750	1940	1942	160	324
BATF2__chr11	0	0	0	0	0	0	0	1	0	0	1	0
BATF3__chr1	3	0	7	0	7	5	6	12	5	1	0	1
BAX__chr19	85	34	52	5	48	43	75	142	62	68	5	7
BAZ1A__chr14	217	104	196	57	108	126	200	337	113	145	15	21
BAZ1B__chr7	642	441	741	90	193	254	430	719	427	442	28	38
BAZ2A__chr12	91	43	90	18	34	24	78	107	93	64	13	5
BAZ2B__chr2	165	104	207	39	45	45	115	169	170	175	19	26
BBC3__chr19	73	48	71	9	48	57	84	198	72	97	4	8
BBIP1__chr10	56	44	68	8	18	25	47	87	52	41	1	4
BBOX1__chr11	4	0	3	2	0	0	0	5	0	1	1	1
BBS10__chr12	13	8	22	1	7	6	10	20	13	9	1	5
BBS12__chr4	26	13	20	4	6	10	19	43	16	15	1	4
BBS1__chr11	141	92	124	10	34	37	58	138	83	77	7	11
BBS2__chr16	50	17	40	11	6	5	18	35	22	27	0	4
BBS4__chr15	64	28	60	7	16	33	50	78	37	45	5	5
BBS5__chr2	19	4	19	2	4	6	10	27	12	16	0	0
BBS7__chr4	85	33	53	14	35	24	49	88	32	52	3	8
BBS9__chr7	176	67	176	12	48	82	82	157	138	146	8	10
BBX__chr3	99	58	147	21	42	44	96	191	61	74	6	12
BCAM__chr19	14	17	11	0	5	4	5	8	8	9	0	1
BCAN__chr1	8	0	20	5	1	0	2	4	3	1	0	0
BCAP29__chr7	107	86	162	16	59	69	95	157	79	64	2	7
BCAP31__chrX	402	231	330	48	195	265	390	757	394	289	32	42
BCAR1__chr16	52	33	47	5	37	43	46	101	66	49	1	2
BCAR3__chr1	740	455	647	106	250	201	403	881	262	184	13	26
BCAR4__chr16	0	0	0	0	0	0	0	0	0	1	0	0
BCAS1__chr20	0	0	1	0	0	0	5	1	3	4	0	0
BCAS2__chr1	177	82	149	20	65	71	132	211	131	119	13	20
BCAS3__chr17	29	23	55	2	13	15	26	50	46	49	1	6
BCAS4__chr20	26	5	12	5	14	8	12	34	26	25	1	4
BCAT1__chr12	1162	734	730	133	649	706	771	1882	616	418	33	62
BCAT2__chr19	236	151	154	28	76	97	148	258	162	105	8	6
BCCIP__chr10	308	179	301	40	123	137	287	512	179	167	19	15
BCDIN3D-AS1__chr12	3	5	2	0	0	0	2	5	8	5	0	3
BCDIN3D__chr12	22	15	37	7	10	13	23	29	30	20	1	4
BCHE__chr3	193	96	293	59	47	49	120	199	116	115	10	30
BCKDHA__chr19	82	39	97	14	16	23	54	84	79	58	1	7
BCKDHB__chr6	229	125	215	38	67	65	155	203	92	93	13	17
BCKDK__chr16	187	116	216	20	82	66	170	287	161	166	16	19
BCL10__chr1	36	11	36	5	10	13	31	35	26	32	2	10
BCL11A__chr2	232	159	663	86	62	77	395	678	648	689	102	204
BCL11B__chr14	108	80	524	64	66	41	358	496	546	776	104	188
BCL2A1__chr15	0	0	0	0	0	0	1	0	0	0	0	0
BCL2L11__chr2	39	39	41	6	16	29	27	58	24	21	2	2
BCL2L12__chr19	250	150	136	23	105	108	101	206	78	57	2	9
BCL2L13__chr22	193	116	199	32	78	99	140	240	167	155	6	12
BCL2L14__chr12	4	6	10	0	0	1	6	6	2	1	0	1
BCL2L15__chr1	1	5	14	2	1	2	2	4	8	8	1	0
BCL2L1__chr20	366	242	364	48	185	158	299	664	531	519	37	52
BCL2L2__chr14	33	7	38	4	18	9	29	45	27	24	0	0
BCL2__chr18	132	60	66	16	16	37	44	90	48	66	7	6
BCL3__chr19	62	38	47	7	22	36	48	111	45	38	0	2
BCL6B__chr17	0	0	1	0	0	0	0	0	0	0	0	0
BCL6__chr3	8	7	16	8	6	13	19	27	45	20	1	2
BCL7A__chr12	468	291	613	86	151	127	401	698	494	457	48	91
BCL7B__chr7	177	84	160	35	51	42	111	195	149	135	11	19
BCL7C__chr16	124	75	104	14	57	58	91	157	68	61	8	7
BCL9L__chr11	39	26	50	7	17	18	24	35	45	42	0	6
BCL9__chr1	383	226	391	42	127	135	234	378	384	385	21	50
BCLAF1__chr6	835	463	699	120	290	278	420	896	737	591	50	97
BCMO1__chr16	1	0	2	0	0	0	0	0	0	0	0	0
BCO2__chr11	0	0	1	0	0	2	0	1	0	2	0	0
BCORL1__chrX	128	64	85	16	38	48	49	86	78	84	5	3
BCOR__chrX	61	26	50	9	23	30	41	78	68	58	3	8
BCR__chr22	44	33	61	5	21	16	49	66	59	59	9	17
BCS1L__chr2	114	76	97	16	33	58	71	141	89	88	0	7
BCYRN1__chrX	145	86	133	32	294	263	324	780	168	135	40	40
BDH1__chr3	3	4	5	0	0	0	2	5	6	3	0	3
BDH2__chr4	235	124	178	22	59	65	95	163	75	78	2	7
BDNF-AS__chr11	4	1	4	1	1	0	3	7	8	3	0	0
BDNF__chr11	2	0	3	2	8	7	7	32	4	5	3	0
BDP1__chr5	19	21	27	4	16	9	17	30	17	40	3	0
BEAN1__chr16	3	1	2	0	2	1	2	1	1	5	0	1
BECN1__chr17	0	0	2	0	0	1	2	2	0	1	0	0
BEGAIN__chr14	32	27	19	2	10	3	19	15	10	15	1	3
BEND2__chrX	2	2	3	1	0	1	2	5	4	5	3	1
BEND3P3__chr10	2	0	5	0	0	0	1	2	1	3	0	0
BEND3__chr6	28	11	42	3	14	9	12	39	16	13	3	0
BEND4__chr4	19	4	24	3	6	3	15	30	51	39	9	13
BEND5__chr1	89	53	135	14	27	24	74	132	176	191	14	18
BEND6__chr6	3	2	3	2	4	0	8	1	2	4	0	0
BEND7__chr10	28	14	28	4	6	5	12	35	33	20	2	5
BEST1__chr11	0	0	0	0	1	0	0	0	2	3	0	0
BEST2__chr19	0	0	0	0	0	0	2	2	0	0	0	0
BEST3__chr12	0	0	0	0	0	0	3	0	0	0	0	0
BEST4__chr1	1	2	3	1	0	0	1	1	0	0	0	0
BET1L__chr11	76	34	53	6	35	43	60	127	86	71	5	12
BET1__chr7	65	46	45	6	31	36	41	80	43	32	2	1
BET3L__chr6	0	0	0	0	0	0	1	0	0	0	0	0
BEX1__chrX	1794	1054	2314	364	915	970	2160	3760	2613	2341	180	452
BEX2__chrX	1150	686	1224	168	509	498	971	1512	1840	1736	100	317
BEX4__chrX	1059	622	1047	148	454	469	874	1636	1333	1326	93	160
BEX5__chrX	59	34	116	3	26	26	78	134	148	132	15	26
BFAR__chr16	259	134	253	26	106	97	192	291	183	164	12	22
BFSP1__chr20	23	4	20	2	1	3	2	2	0	0	0	1
BGN__chrX	0	1	3	0	3	0	2	6	1	2	0	0
BHLHA15__chr7	0	0	0	0	0	0	1	0	0	0	0	0
BHLHB9__chrX	155	85	186	31	39	41	97	212	130	107	13	18
BHLHE22__chr8	0	0	6	2	0	0	4	4	3	0	0	0
BHLHE40-AS1__chr3	0	0	0	0	0	0	0	1	0	0	0	0
BHLHE40__chr3	2	2	2	0	3	1	5	11	9	4	1	0
BHLHE41__chr12	1	0	3	1	4	2	6	11	2	1	0	0
BHMT2__chr5	4	3	5	0	3	0	4	9	5	5	0	1
BHMT__chr5	0	0	0	0	0	0	1	1	0	0	0	0
BICC1__chr10	0	0	0	0	0	0	0	0	1	0	0	0
BICD1__chr12	11	6	20	2	6	4	10	17	14	12	2	1
BICD2__chr9	108	77	108	16	59	59	72	142	80	78	1	11
BID__chr22	51	21	49	11	16	14	45	54	39	26	2	2
BIK__chr22	2	2	3	0	4	3	1	5	4	1	2	3
BIN1__chr2	66	46	43	6	24	30	36	64	96	81	2	8
BIN2__chr12	0	0	0	0	0	0	0	0	0	3	0	0
BIN3__chr8	40	21	31	4	16	16	27	42	47	23	1	1
BIRC2__chr11	140	65	134	30	69	68	102	234	112	94	10	17
BIRC3__chr11	2	1	1	0	3	8	2	7	4	2	0	0
BIRC5__chr17	387	238	312	34	96	115	155	359	90	82	8	6
BIRC6__chr2	118	68	128	21	29	49	73	168	124	121	9	12
BIVM__chr13	66	44	86	14	14	25	35	64	58	79	5	9
BLCAP__chr20	311	180	340	41	99	119	233	352	422	459	41	37
BLMH__chr17	32	18	26	4	12	11	22	50	30	26	3	11
BLM__chr15	94	58	68	5	25	19	26	53	17	20	2	3
BLOC1S1-RDH5__chr12	48	29	71	9	15	27	38	83	41	40	3	7
BLOC1S1__chr12	462	291	532	76	173	175	333	638	322	296	24	63
BLOC1S2__chr10	1169	710	1266	197	702	974	1322	2405	1273	1304	118	256
BLOC1S3__chr19	37	17	38	4	20	21	33	62	36	52	4	5
BLOC1S4__chr4	90	62	92	15	47	65	80	136	67	76	10	13
BLOC1S5__chr6	0	0	0	0	0	0	0	0	0	0	2	0
BLOC1S6__chr15	252	144	261	33	117	115	195	370	213	193	12	24
BLVRA__chr7	108	74	120	20	42	47	102	185	66	65	4	11
BLVRB__chr19	25	16	37	2	28	26	30	69	24	19	4	3
BLZF1__chr1	6	5	11	0	7	8	4	14	4	13	0	2
BMF__chr15	117	96	127	28	47	49	92	105	75	49	4	16
BMP1__chr8	74	32	70	7	22	36	44	71	61	45	6	10
BMP2K__chr4	13	5	9	1	6	2	4	10	10	16	2	1
BMP2__chr20	1	1	8	2	3	1	3	4	4	8	0	1
BMP3__chr4	0	0	2	1	0	1	2	3	0	0	0	0
BMP4__chr14	112	59	31	5	28	18	9	24	50	45	1	3
BMP5__chr6	1	1	0	0	0	2	0	0	0	0	0	1
BMP6__chr6	0	0	1	0	0	0	0	0	0	0	0	0
BMP7__chr20	374	255	254	63	130	135	278	491	192	197	7	18
BMP8A__chr1	3	2	6	0	2	9	1	7	3	4	2	0
BMP8B__chr1	1	0	0	1	1	0	0	0	1	2	0	1
BMPER__chr7	1	0	0	0	0	1	0	0	1	1	0	0
BMPR1A__chr10	187	83	167	29	53	66	78	144	86	77	5	9
BMPR1B__chr4	10	2	16	0	5	1	6	14	3	0	0	0
BMPR2__chr2	99	52	143	12	46	45	82	178	138	104	15	24
BMS1P4__chr10	4	0	6	3	0	0	2	3	2	0	1	0
BMS1__chr10	135	81	112	13	43	34	53	171	102	70	11	9
BMX__chrX	0	0	0	0	0	0	0	0	0	0	1	0
BNC2__chr9	16	14	12	2	8	10	4	11	12	12	1	3
BNIP1__chr5	26	19	27	2	13	18	25	47	19	15	4	8
BNIP2__chr15	92	59	103	10	46	52	88	158	80	56	5	12
BNIP3L__chr8	463	247	501	80	182	142	317	523	423	432	39	63
BNIP3__chr10	152	100	177	28	90	109	180	324	212	196	8	23
BNIPL__chr1	3	2	0	0	0	0	0	0	0	0	0	0
BOC__chr3	4	0	8	1	0	0	2	4	0	1	1	0
BOD1L1__chr4	26	13	54	8	21	18	27	61	40	63	3	9
BOD1__chr5	97	59	79	18	25	33	55	87	65	67	4	7
BOK__chr2	108	60	77	8	75	90	95	265	108	71	1	12
BOLA1__chr1	59	21	54	11	14	17	33	55	50	29	4	9
BOLA3-AS1__chr2	75	42	47	5	19	24	53	82	62	81	1	9
BOLA3__chr2	395	248	384	47	240	205	380	720	291	260	16	28
BOP1__chr8	93	55	45	18	35	30	55	138	54	46	5	14
BORA__chr13	6	5	4	0	1	1	0	4	0	1	0	0
BPGM__chr7	144	71	183	18	88	93	149	197	133	159	13	13
BPHL__chr6	38	18	37	10	13	12	23	49	25	31	6	5
BPIFC__chr22	0	0	0	0	0	0	0	2	1	0	0	0
BPI__chr20	0	0	0	0	0	0	0	0	0	3	0	0
BPNT1__chr1	46	18	47	4	26	27	30	51	36	46	4	2
BPTF__chr17	197	137	229	43	64	71	162	230	240	236	19	36
BRAF__chr7	6	1	7	1	4	2	6	8	10	9	4	0
BRAP__chr12	52	27	59	9	18	19	32	82	57	32	1	8
BRAT1__chr7	99	50	97	14	22	28	51	102	44	52	2	7
BRCA1__chr17	1021	614	906	118	207	234	460	685	169	203	21	17
BRCA2__chr13	4	3	8	2	3	0	2	7	1	3	3	1
BRCC3__chrX	45	26	60	9	18	31	36	65	31	41	0	13
BRD1__chr22	40	29	55	5	16	20	42	83	50	53	3	16
BRD2__chr6	436	251	484	61	168	156	310	552	385	309	13	43
BRD3__chr9	22	9	43	2	9	10	15	34	27	30	1	2
BRD4__chr19	94	78	294	31	37	94	87	171	131	183	9	17
BRD7P3__chr6	0	0	1	0	1	0	1	0	0	1	2	4
BRD7__chr16	191	120	207	23	77	69	142	247	134	137	10	27
BRD8__chr5	407	211	479	69	105	115	216	384	254	246	18	38
BRD9__chr5	90	51	75	9	23	34	61	160	76	76	3	6
BRDT__chr1	0	0	0	1	0	0	1	1	1	2	0	0
BRE-AS1__chr2	1	2	3	0	2	3	0	6	0	3	0	0
BREA2__chr8	0	0	0	0	1	1	2	0	0	1	1	0
BRE__chr2	105	64	73	12	43	46	75	147	78	79	2	10
BRF1__chr14	30	16	41	6	13	9	17	53	39	41	1	3
BRF2__chr8	58	43	53	13	30	23	62	103	35	47	2	3
BRI3BP__chr12	25	7	8	3	7	9	12	26	7	3	0	0
BRI3__chr7	771	404	716	109	379	478	640	1266	934	858	49	120
BRICD5__chr16	11	7	8	0	1	2	4	4	7	8	1	0
BRIP1__chr17	121	77	121	10	33	28	44	78	27	26	2	6
BRIX1__chr5	123	84	105	22	47	67	115	226	68	60	5	8
BRK1__chr3	1267	899	1280	199	624	652	1105	1921	1330	1467	125	186
BRMS1L__chr14	55	21	56	8	28	22	35	70	31	36	2	3
BRMS1__chr11	111	56	65	11	48	46	88	233	63	56	5	9
BROX__chr1	3	0	0	1	0	0	1	4	2	1	0	0
BRPF1__chr3	131	63	144	18	40	53	86	150	98	82	5	18
BRPF3__chr6	67	51	97	21	18	26	55	91	69	42	4	6
BRSK1__chr19	24	17	60	14	19	31	48	96	86	103	6	15
BRSK2__chr11	56	49	85	11	20	21	72	97	111	125	9	11
BRWD1__chr21	120	93	198	33	61	77	137	210	199	181	26	23
BRWD3__chrX	51	34	100	18	24	14	42	71	68	68	6	16
BSCL2__chr11	0	0	0	0	0	0	0	0	0	2	0	0
BSDC1__chr1	18	12	40	3	4	6	19	28	26	31	6	1
BSG__chr19	630	383	473	66	272	287	401	872	303	326	21	42
BSN-AS2__chr3	0	3	0	0	1	1	2	2	2	6	1	1
BSN__chr3	110	73	175	27	46	42	106	166	282	299	13	49
BSPRY__chr9	0	0	0	0	0	1	0	0	0	0	0	0
BST1__chr4	1	0	1	0	1	3	3	3	4	1	0	1
BST2__chr19	0	0	0	0	1	0	0	0	0	0	0	0
BTAF1__chr10	83	21	56	9	32	23	56	79	43	49	1	8
BTBD10__chr11	413	232	518	74	242	279	397	832	577	528	46	87
BTBD11__chr12	13	8	17	2	5	3	12	20	4	7	1	2
BTBD16__chr10	0	1	0	0	0	0	0	0	0	0	0	0
BTBD17__chr17	71	55	49	4	8	16	25	27	40	53	1	5
BTBD1__chr15	29	7	18	2	9	6	28	53	28	24	1	3
BTBD2__chr19	518	294	481	59	93	145	292	546	350	333	22	42
BTBD3__chr20	18	14	36	5	13	7	22	43	21	28	3	3
BTBD6__chr14	72	24	91	9	14	23	41	92	73	65	5	18
BTBD7__chr14	44	24	49	6	22	16	33	47	40	51	1	9
BTBD8__chr1	0	0	0	0	0	0	0	1	0	0	0	2
BTBD9__chr6	78	31	71	10	21	24	63	86	72	98	8	12
BTC__chr4	0	0	0	0	0	0	0	1	0	0	0	0
BTD__chr3	8	8	17	2	0	7	7	10	9	11	0	3
BTF3L4__chr1	1772	823	2006	244	725	723	1729	2261	2044	1988	174	376
BTF3P11__chr13	0	0	0	0	0	1	0	0	0	0	0	0
BTF3__chr5	1009	738	930	130	437	673	888	1559	669	778	62	90
BTG1__chr12	177	72	208	30	42	37	120	174	190	181	13	27
BTG2__chr1	60	38	83	9	33	43	81	129	37	30	0	7
BTG3__chr21	650	372	811	114	316	346	579	1199	353	307	26	30
BTK__chrX	0	0	0	0	0	1	0	0	0	0	0	0
BTN1A1__chr6	0	3	0	0	0	0	0	2	0	1	0	0
BTN2A1__chr6	108	39	122	28	45	72	104	170	129	126	10	24
BTN2A2__chr6	14	14	18	0	5	0	10	8	7	8	1	1
BTN2A3P__chr6	4	0	0	0	1	0	0	1	0	1	0	1
BTN3A1__chr6	39	19	21	3	5	3	6	28	31	25	3	0
BTN3A2__chr6	12	6	3	1	3	2	4	8	2	3	0	0
BTN3A3__chr6	4	1	4	0	0	0	1	0	1	3	0	0
BTNL3__chr5	0	0	0	0	0	0	0	0	0	1	1	0
BTNL8__chr5	0	0	0	0	0	0	0	1	1	0	0	0
BTNL9__chr5	0	0	0	0	0	0	0	1	0	0	0	0
BTRC__chr10	66	38	86	7	24	26	58	99	88	70	9	12
BUB1B__chr15	476	322	444	80	156	146	198	382	124	116	7	14
BUB1__chr2	151	106	112	18	45	59	79	135	34	32	4	3
BUB3__chr10	633	348	640	103	246	230	457	695	367	338	25	38
BUD13__chr11	79	46	72	9	28	14	42	102	34	44	5	3
BUD31__chr7	41	37	44	2	22	24	45	83	42	29	2	3
BVES-AS1__chr6	0	0	0	0	0	0	0	0	1	0	0	0
BVES__chr6	16	10	14	2	11	16	8	44	9	6	0	1
BYSL__chr6	46	27	33	11	11	22	38	83	30	23	2	0
BZRAP1-AS1__chr17	13	7	29	0	1	4	10	6	24	22	1	5
BZRAP1__chr17	33	16	39	5	6	5	13	29	43	50	1	4
BZW1__chr2	581	374	609	91	321	382	471	969	433	333	33	60
BZW2__chr7	120	73	98	17	36	55	87	166	121	127	12	31
C10orf107__chr10	3	2	0	0	2	0	0	5	0	2	0	0
C10orf10__chr10	1	1	0	0	0	1	0	1	2	1	0	0
C10orf111__chr10	2	7	6	3	2	5	1	2	5	3	0	0
C10orf113__chr10	0	0	0	0	0	1	0	2	0	0	0	0
C10orf114__chr10	16	19	36	6	10	8	29	54	18	12	1	0
C10orf116__chr10	0	1	0	0	0	0	0	0	0	0	0	0
C10orf118__chr10	4	2	3	4	1	3	3	7	4	9	2	1
C10orf11__chr10	0	1	1	1	0	4	2	9	8	1	0	2
C10orf12__chr10	7	3	4	2	4	0	10	13	4	4	4	2
C10orf131__chr10	0	1	1	0	0	0	0	0	1	0	0	0
C10orf137__chr10	35	19	58	8	12	12	28	42	21	22	1	1
C10orf25__chr10	8	3	11	0	2	8	15	22	5	11	0	6
C10orf2__chr10	8	4	12	0	17	5	10	21	4	6	0	2
C10orf32__chr10	90	67	138	21	25	37	88	142	91	94	5	15
C10orf35__chr10	80	39	40	8	25	29	45	91	139	151	8	32
C10orf54__chr10	4	1	1	0	2	0	0	0	0	0	0	0
C10orf55__chr10	1	0	0	0	1	0	0	5	2	0	0	0
C10orf67__chr10	1	2	1	0	3	1	1	6	1	0	0	3
C10orf68__chr10	0	1	0	0	0	0	0	1	0	0	0	0
C10orf76__chr10	52	36	61	11	23	22	45	73	49	40	3	4
C10orf88__chr10	35	34	59	12	20	19	38	75	45	51	5	7
C10orf90__chr10	2	0	3	0	0	0	0	0	0	0	0	0
C10orf95__chr10	0	1	0	0	0	0	0	1	1	1	0	0
C10orf99__chr10	0	0	0	0	0	0	0	1	0	0	0	0
C11orf1__chr11	107	78	117	13	48	50	70	157	79	67	8	23
C11orf24__chr11	214	139	155	30	88	127	137	346	167	153	8	35
C11orf30__chr11	34	19	27	4	4	6	16	34	21	20	3	6
C11orf31__chr11	776	458	646	118	313	374	545	988	462	424	29	51
C11orf44__chr11	0	0	1	0	0	0	0	0	0	0	0	0
C11orf45__chr11	0	0	1	0	1	2	0	4	2	1	0	0
C11orf48__chr11	159	99	125	30	66	62	141	253	103	87	7	9
C11orf49__chr11	151	100	213	29	53	58	153	344	172	155	11	24
C11orf54__chr11	18	9	16	4	4	4	11	22	10	13	1	3
C11orf57__chr11	95	52	112	14	31	38	92	147	97	97	15	19
C11orf58__chr11	946	572	957	139	391	439	743	1358	694	636	60	127
C11orf63__chr11	0	0	8	0	1	0	2	1	0	3	0	0
C11orf65__chr11	0	1	0	0	0	1	0	4	1	0	0	0
C11orf68__chr11	145	76	130	24	67	73	105	221	174	153	5	28
C11orf70__chr11	2	4	11	1	3	4	4	13	2	1	0	0
C11orf71__chr11	92	47	109	7	32	49	62	114	96	68	6	6
C11orf73__chr11	242	110	201	36	93	71	187	311	158	166	11	23
C11orf74__chr11	86	35	60	4	21	24	34	71	41	43	3	5
C11orf75__chr11	75	47	37	5	23	46	34	72	22	30	0	3
C11orf80__chr11	18	13	12	3	11	6	8	24	17	15	2	3
C11orf82__chr11	49	28	63	9	14	24	28	63	12	8	3	2
C11orf83__chr11	128	95	100	16	50	59	78	167	59	50	4	1
C11orf84__chr11	634	266	523	71	187	255	335	601	462	417	26	38
C11orf86__chr11	0	0	1	0	0	0	0	0	0	0	0	0
C11orf87__chr11	157	104	109	6	30	26	34	46	41	34	6	7
C11orf88__chr11	0	0	0	0	0	1	0	1	0	0	0	0
C11orf91__chr11	2	1	2	0	1	2	0	2	1	2	0	0
C11orf92__chr11	3	0	0	0	0	1	0	7	1	0	0	0
C11orf93__chr11	0	0	5	0	1	0	0	0	0	0	0	0
C11orf94__chr11	1	0	2	0	0	0	0	1	0	2	0	0
C11orf95__chr11	254	162	405	44	89	89	254	432	481	415	31	71
C11orf96__chr11	31	15	173	21	25	14	140	237	143	178	11	32
C12orf10__chr12	148	111	124	21	55	50	76	194	139	119	9	11
C12orf23__chr12	147	90	170	21	55	75	81	213	115	93	7	15
C12orf29__chr12	46	30	52	15	14	20	35	53	25	24	2	2
C12orf36__chr12	0	1	1	0	2	2	0	1	0	2	0	0
C12orf39__chr12	4	8	3	0	1	4	0	1	2	0	0	0
C12orf42__chr12	1	0	0	0	1	0	0	0	0	0	0	0
C12orf43__chr12	30	22	35	4	14	17	26	40	22	26	3	3
C12orf44__chr12	71	30	60	6	30	22	40	87	70	52	4	8
C12orf45__chr12	128	90	98	23	88	116	159	289	98	94	5	8
C12orf49__chr12	31	23	34	4	21	18	46	66	18	33	1	6
C12orf4__chr12	43	29	50	13	12	23	30	56	30	34	2	5
C12orf50__chr12	0	1	0	0	0	1	0	0	1	1	1	3
C12orf52__chr12	77	52	74	8	40	36	86	133	69	78	6	11
C12orf57__chr12	1020	657	1283	175	330	421	681	1323	821	803	101	147
C12orf5__chr12	227	93	205	31	119	145	251	396	155	125	11	19
C12orf60__chr12	1	0	2	0	0	1	0	2	1	0	1	0
C12orf61__chr12	7	2	5	0	1	2	2	11	1	4	1	0
C12orf65__chr12	30	18	27	2	10	13	18	50	28	22	2	5
C12orf66__chr12	5	0	3	1	0	5	3	5	0	1	0	0
C12orf68__chr12	187	98	242	39	49	65	187	409	338	411	19	51
C12orf69__chr12	0	0	0	0	1	2	2	2	0	0	0	0
C12orf70__chr12	0	0	0	0	0	0	0	0	0	2	0	0
C12orf71__chr12	0	0	0	1	0	0	0	0	0	0	0	0
C12orf73__chr12	60	34	58	18	39	44	66	121	99	81	8	16
C12orf75__chr12	270	184	401	56	178	218	341	837	218	196	11	13
C12orf76__chr12	83	32	111	25	25	45	57	96	81	85	4	17
C12orf77__chr12	0	0	3	0	1	0	1	1	1	2	2	1
C14orf101__chr14	27	25	39	5	21	25	18	54	27	25	3	13
C14orf105__chr14	0	0	0	0	0	0	0	0	0	1	0	0
C14orf119__chr14	285	153	226	41	133	118	196	374	175	137	11	19
C14orf132__chr14	438	240	622	67	97	107	317	462	579	601	38	90
C14orf142__chr14	54	27	41	13	22	31	26	73	25	42	7	4
C14orf159__chr14	55	29	34	9	16	7	21	50	45	39	2	8
C14orf166__chr14	559	308	495	78	260	299	490	823	393	404	39	54
C14orf169__chr14	75	35	77	15	22	26	44	93	42	28	2	4
C14orf178__chr14	1	2	4	1	0	1	3	2	1	1	2	0
C14orf182__chr14	2	2	3	0	2	0	2	4	4	1	1	0
C14orf1__chr14	475	281	459	64	217	252	390	770	412	368	25	68
C14orf23__chr14	1777	955	1177	158	398	400	616	1010	604	639	37	46
C14orf28__chr14	27	14	20	1	3	9	22	25	15	23	1	2
C14orf2__chr14	1271	813	1305	176	529	630	996	1870	997	849	92	138
C14orf37__chr14	8	8	23	2	4	3	8	20	18	11	0	3
C14orf39__chr14	0	1	0	0	0	1	0	0	0	0	0	0
C14orf64__chr14	0	0	1	0	0	0	0	0	0	0	0	2
C14orf79__chr14	11	5	7	3	4	4	4	10	8	6	0	2
C14orf80__chr14	7	6	7	3	2	2	6	18	7	5	0	2
C14orf93__chr14	16	13	25	0	6	10	17	24	17	23	3	2
C15orf26__chr15	1	0	0	0	1	0	0	0	0	0	0	0
C15orf27__chr15	0	2	1	0	0	0	0	0	2	8	2	0
C15orf32__chr15	7	3	2	0	0	0	5	2	5	7	0	0
C15orf37__chr15	9	6	16	1	7	4	10	20	12	2	0	1
C15orf38__chr15	29	21	35	1	13	8	21	50	16	17	0	4
C15orf39__chr15	20	11	7	2	2	4	1	8	5	2	0	0
C15orf40__chr15	37	19	38	7	10	18	27	52	27	16	1	2
C15orf41__chr15	24	14	26	5	15	8	14	15	12	13	3	0
C15orf48__chr15	1	0	0	0	0	0	0	0	0	0	0	0
C15orf52__chr15	1	0	3	0	2	0	2	5	1	2	1	1
C15orf53__chr15	0	0	0	0	0	0	0	0	0	1	1	0
C15orf56__chr15	1	0	1	0	0	0	0	0	0	0	0	0
C15orf57__chr15	96	66	137	17	31	20	84	145	116	103	4	16
C15orf59__chr15	0	0	0	0	0	0	0	0	1	0	0	0
C15orf61__chr15	72	37	71	10	21	32	46	82	69	65	4	6
C16orf13__chr16	166	82	131	23	53	58	126	190	90	75	8	8
C16orf3__chr16	0	0	0	0	0	0	0	0	0	0	1	0
C16orf45__chr16	726	422	1076	154	257	214	732	1209	1219	1135	77	192
C16orf46__chr16	24	11	22	2	7	15	18	37	22	15	0	3
C16orf52__chr16	40	21	54	8	10	14	37	36	37	69	2	8
C16orf54__chr16	0	0	0	0	0	0	0	0	1	2	0	0
C16orf55__chr16	116	99	103	15	33	43	57	121	83	65	4	4
C16orf58__chr16	316	181	307	52	104	134	217	510	256	270	16	29
C16orf59__chr16	30	19	25	4	11	13	15	42	13	11	1	2
C16orf62__chr16	159	104	168	37	79	55	103	207	145	127	8	13
C16orf70__chr16	11	5	13	2	3	6	9	15	4	1	0	2
C16orf71__chr16	1	0	2	0	0	0	4	1	1	8	1	0
C16orf72__chr16	416	286	516	107	192	220	348	716	378	345	20	57
C16orf74__chr16	1	2	1	1	0	0	0	2	1	2	0	0
C16orf80__chr16	1252	645	1188	194	488	549	982	1788	959	843	72	130
C16orf82__chr16	0	0	2	0	0	0	0	0	0	0	0	0
C16orf86__chr16	23	12	10	2	7	5	11	10	12	8	0	1
C16orf87__chr16	16	9	21	3	6	10	13	33	18	17	0	6
C16orf88__chr16	103	40	52	12	33	21	36	96	33	43	1	6
C16orf91__chr16	75	46	72	16	27	31	64	119	48	57	3	6
C16orf93__chr16	1	0	3	2	0	1	3	4	1	2	0	1
C16orf95__chr16	17	13	23	4	4	13	16	20	11	22	3	1
C16orf97__chr16	0	0	0	0	0	0	0	0	1	0	0	0
C17orf100__chr17	72	35	81	11	31	29	36	72	97	76	7	17
C17orf103__chr17	73	30	100	11	18	26	78	106	79	101	2	17
C17orf104__chr17	0	0	0	0	0	0	0	0	0	1	0	0
C17orf107__chr17	0	0	1	0	0	0	0	0	0	2	0	0
C17orf50__chr17	3	1	3	0	3	0	4	6	4	8	0	1
C17orf51__chr17	20	10	15	1	6	7	16	24	10	10	0	4
C17orf53__chr17	15	18	19	2	6	9	4	16	6	10	1	1
C17orf58__chr17	227	145	249	39	116	116	161	331	240	251	15	26
C17orf59__chr17	16	14	9	3	10	9	20	23	20	23	2	5
C17orf62__chr17	62	26	69	4	17	14	46	94	47	43	2	9
C17orf64__chr17	1	0	0	0	0	0	0	1	0	0	0	0
C17orf67__chr17	19	6	16	2	12	11	3	21	3	9	0	0
C17orf70__chr17	18	3	8	2	8	6	9	20	17	21	1	0
C17orf72__chr17	1	1	3	0	0	2	0	2	0	3	0	0
C17orf74__chr17	0	0	0	0	0	1	4	1	1	1	0	0
C17orf75__chr17	110	55	131	23	41	39	79	152	69	78	10	14
C17orf76-AS1__chr17	1943	1343	1901	244	850	938	1517	2750	1834	1484	150	264
C17orf77__chr17	0	0	3	0	0	1	0	2	2	2	2	0
C17orf80__chr17	153	92	143	19	48	37	94	181	94	109	11	19
C17orf82__chr17	1	0	5	0	1	0	0	1	1	0	0	0
C17orf85__chr17	177	128	212	39	56	45	105	250	156	159	10	24
C17orf89__chr17	378	265	313	55	202	172	332	798	179	179	21	24
C17orf96__chr17	6	4	9	1	0	1	2	4	1	6	0	1
C17orf97__chr17	135	69	127	22	33	42	92	149	98	97	6	13
C17orf98__chr17	1	2	0	0	3	2	2	2	0	0	0	0
C17orf99__chr17	0	0	0	0	0	1	0	0	0	1	0	0
C18orf21__chr18	82	47	65	11	34	22	50	106	43	40	2	4
C18orf25__chr18	34	19	36	5	23	25	43	59	27	27	5	6
C18orf32__chr18	0	0	0	1	0	1	1	1	1	1	0	0
C18orf42__chr18	0	0	0	0	0	0	2	1	2	0	0	0
C18orf54__chr18	130	62	133	15	22	35	49	97	32	31	4	7
C18orf56__chr18	43	23	40	6	11	15	24	28	15	7	2	1
C18orf61__chr18	4	0	0	0	1	0	1	1	0	0	0	0
C18orf63__chr18	0	0	0	0	0	0	0	0	0	2	0	0
C18orf8__chr18	19	26	20	2	8	15	15	31	20	25	1	2
C19orf10__chr19	146	71	138	11	75	97	149	286	85	67	7	12
C19orf12__chr19	147	104	217	26	61	56	117	221	200	245	11	35
C19orf18__chr19	3	4	8	2	4	4	1	8	5	5	0	3
C19orf21__chr19	0	1	0	0	2	1	0	1	1	2	1	0
C19orf24__chr19	54	36	44	7	38	39	37	89	39	32	1	4
C19orf25__chr19	100	66	91	9	21	41	65	107	85	88	9	12
C19orf26__chr19	3	2	4	1	3	1	3	5	9	3	0	0
C19orf33__chr19	0	1	1	0	0	0	0	0	0	0	0	0
C19orf35__chr19	0	0	0	0	0	0	0	2	0	0	0	0
C19orf40__chr19	8	6	9	3	3	2	2	17	8	3	0	2
C19orf43__chr19	764	503	732	95	312	311	645	1197	863	707	69	99
C19orf44__chr19	6	5	4	2	0	0	1	10	6	3	0	0
C19orf45__chr19	0	0	1	0	1	0	2	1	4	1	0	0
C19orf47__chr19	27	17	28	5	8	9	16	41	22	23	1	3
C19orf48__chr19	149	86	119	17	49	62	74	157	49	41	7	9
C19orf52__chr19	50	26	39	4	22	9	32	52	28	20	1	5
C19orf53__chr19	512	322	505	63	201	227	348	798	345	307	30	44
C19orf54__chr19	115	93	112	25	39	46	85	152	119	96	2	12
C19orf55__chr19	2	1	2	0	1	1	3	2	1	0	0	0
C19orf57__chr19	12	6	8	0	5	5	9	10	14	12	1	3
C19orf60__chr19	220	99	168	30	91	72	153	246	188	136	12	21
C19orf66__chr19	12	3	13	1	4	6	11	13	34	40	4	4
C19orf6__chr19	69	48	82	9	25	41	75	131	76	87	4	11
C19orf70__chr19	105	76	106	10	56	62	97	191	111	86	4	12
C19orf73__chr19	11	8	24	3	3	3	9	17	16	17	0	1
C19orf77__chr19	0	0	1	1	1	0	0	0	0	3	0	3
C19orf81__chr19	4	7	4	1	1	2	2	7	3	4	0	0
C1D__chr2	56	31	68	12	33	39	36	90	41	54	4	5
C1GALT1C1__chrX	46	25	43	6	26	17	34	44	19	28	2	1
C1GALT1__chr7	70	52	68	10	40	51	62	118	58	49	7	6
C1QBP__chr17	182	117	163	21	83	79	142	314	105	94	2	15
C1QL1__chr17	3	2	1	0	6	4	6	8	1	3	1	3
C1QL2__chr2	0	5	8	2	0	0	1	5	0	2	0	0
C1QL3__chr10	0	0	0	0	0	0	0	0	1	0	0	0
C1QL4__chr12	0	0	3	0	0	0	1	0	2	0	2	0
C1QTNF1__chr17	3	7	18	2	0	0	4	9	12	4	0	0
C1QTNF2__chr5	3	5	7	2	2	0	5	10	2	5	2	0
C1QTNF3-AMACR__chr5	0	0	0	0	1	0	0	0	0	0	0	0
C1QTNF3__chr5	11	4	17	4	1	4	6	8	15	10	0	0
C1QTNF4__chr11	3	0	0	0	0	0	0	1	3	5	0	0
C1QTNF6__chr22	35	25	35	5	8	13	31	48	31	42	3	7
C1QTNF7__chr4	0	0	0	0	0	0	0	0	1	4	0	0
C1QTNF8__chr16	1	0	0	0	0	0	0	0	0	0	0	0
C1QTNF9B-AS1__chr13	3	1	1	0	0	4	4	2	0	4	0	0
C1QTNF9__chr13	0	0	3	0	0	0	2	2	0	0	0	0
C1RL-AS1__chr12	8	4	5	0	2	3	9	2	9	1	1	1
C1RL__chr12	2	7	5	2	1	4	1	6	5	2	2	3
C1R__chr12	2	2	7	1	2	4	1	2	1	0	2	0
C1S__chr12	29	8	12	2	1	9	6	31	11	11	0	0
C1orf101__chr1	1	0	0	0	0	0	0	2	0	4	1	0
C1orf105__chr1	0	0	0	0	0	0	0	1	0	1	0	0
C1orf106__chr1	119	54	75	13	21	30	32	80	29	10	3	3
C1orf109__chr1	56	27	45	8	21	21	42	50	27	26	0	4
C1orf112__chr1	8	11	16	1	8	3	3	15	6	2	0	0
C1orf114__chr1	40	16	56	9	10	17	29	71	35	30	1	3
C1orf115__chr1	6	4	1	1	1	4	3	2	3	2	0	1
C1orf116__chr1	0	0	0	0	0	0	0	5	0	0	0	0
C1orf122__chr1	350	230	430	67	210	197	417	660	320	307	26	49
C1orf123__chr1	221	141	243	27	85	91	160	317	154	164	17	11
C1orf126__chr1	0	0	0	0	0	0	0	1	0	1	0	0
C1orf131__chr1	22	23	23	4	8	9	17	50	19	23	0	6
C1orf140__chr1	1	0	1	0	4	0	0	0	1	1	0	3
C1orf145__chr1	5	6	3	0	0	1	1	3	8	1	2	1
C1orf159__chr1	13	7	20	4	8	3	5	31	7	10	2	4
C1orf162__chr1	4	8	16	5	13	16	21	21	10	26	0	1
C1orf172__chr1	0	0	0	0	1	0	0	2	0	0	0	1
C1orf174__chr1	85	53	61	13	33	33	52	94	37	35	6	9
C1orf180__chr1	0	0	0	0	0	0	1	0	0	0	0	0
C1orf186__chr1	49	39	65	10	23	39	45	83	33	40	2	9
C1orf192__chr1	2	0	6	0	0	0	7	5	1	1	0	0
C1orf194__chr1	11	10	15	1	1	0	11	16	12	11	0	0
C1orf198__chr1	444	247	390	60	134	171	283	543	202	238	12	29
C1orf204__chr1	0	0	0	0	1	1	0	0	0	1	0	0
C1orf210__chr1	0	1	0	0	0	0	0	1	0	1	0	0
C1orf213__chr1	28	20	38	13	18	22	29	48	17	18	1	2
C1orf216__chr1	18	10	22	4	3	5	10	21	10	17	0	7
C1orf21__chr1	281	178	292	22	106	97	112	224	175	168	7	14
C1orf220__chr1	1	1	1	0	2	2	1	7	3	0	0	0
C1orf226__chr1	23	28	74	8	7	17	26	83	40	39	3	2
C1orf228__chr1	0	1	1	0	0	0	4	2	2	8	0	2
C1orf229__chr1	3	0	3	0	2	0	2	1	1	3	0	0
C1orf233__chr1	96	55	96	9	28	42	57	100	133	115	2	18
C1orf27__chr1	88	57	66	12	25	49	62	132	65	59	2	9
C1orf35__chr1	35	28	37	6	9	8	18	47	29	29	1	7
C1orf43__chr1	1322	763	1368	219	611	750	1096	2205	1242	1139	90	184
C1orf50__chr1	49	27	65	6	30	26	74	86	73	70	9	5
C1orf51__chr1	22	7	12	1	11	10	28	52	12	22	0	0
C1orf52__chr1	39	30	64	16	27	36	44	75	70	68	4	7
C1orf53__chr1	18	9	9	2	5	7	8	18	6	11	1	4
C1orf54__chr1	32	17	34	4	19	16	33	55	26	23	0	3
C1orf56__chr1	37	13	27	1	1	4	22	27	13	17	0	1
C1orf61__chr1	308	132	1582	199	51	26	411	522	80	83	28	62
C1orf63__chr1	68	31	86	17	23	24	48	69	49	45	4	8
C1orf64__chr1	0	0	0	0	0	0	0	0	0	0	1	0
C1orf74__chr1	2	3	5	0	1	4	7	11	5	7	0	0
C1orf85__chr1	21	2	14	3	4	5	12	14	6	10	0	0
C1orf86__chr1	132	68	119	16	78	78	120	179	104	98	6	20
C1orf87__chr1	0	0	0	0	0	0	0	1	0	0	1	0
C1orf95__chr1	5	1	0	0	0	0	1	4	0	0	0	0
C20orf111__chr20	179	110	115	23	76	71	81	188	138	121	2	20
C20orf112__chr20	349	185	327	39	135	121	257	379	591	560	33	72
C20orf118__chr20	0	1	0	0	1	0	0	0	0	0	0	0
C20orf166-AS1__chr20	4	0	2	0	1	0	1	0	2	4	0	0
C20orf173__chr20	0	0	0	0	0	0	2	0	0	0	0	0
C20orf194__chr20	28	23	63	6	7	5	38	74	60	54	4	4
C20orf195__chr20	19	22	24	0	9	3	11	28	27	23	0	5
C20orf196__chr20	5	3	6	0	4	5	11	9	7	8	2	0
C20orf197__chr20	0	0	0	0	0	0	0	0	0	2	0	0
C20orf201__chr20	5	3	14	6	1	3	21	11	15	19	1	4
C20orf202__chr20	0	0	0	0	0	0	0	0	0	1	0	0
C20orf203__chr20	1	2	2	0	0	2	1	2	3	4	0	0
C20orf26__chr20	0	1	1	0	1	0	0	0	0	3	0	0
C20orf27__chr20	123	67	150	16	50	39	122	294	117	83	3	8
C20orf85__chr20	0	0	1	0	0	0	0	0	0	0	0	0
C20orf96__chr20	21	10	42	5	8	6	15	27	11	3	0	1
C21orf119__chr21	3	0	2	0	0	2	1	9	3	2	0	0
C21orf128__chr21	0	0	0	0	0	0	0	1	0	0	0	0
C21orf2__chr21	31	15	22	1	7	5	22	27	18	17	2	3
C21orf33__chr21	161	91	189	30	50	72	119	231	103	92	12	9
C21orf37__chr21	0	0	0	0	0	0	0	0	1	0	0	0
C21orf49__chr21	1	1	1	0	0	0	0	1	4	2	1	0
C21orf54__chr21	0	0	0	0	0	0	0	0	0	0	1	0
C21orf58__chr21	87	56	113	14	24	25	35	70	39	35	3	7
C21orf59__chr21	177	110	189	36	97	78	176	337	143	108	12	24
C21orf62__chr21	191	132	236	27	34	45	140	162	105	105	5	8
C21orf67__chr21	9	7	10	2	3	7	5	5	7	4	0	1
C21orf7__chr21	0	1	1	0	3	5	1	1	5	4	0	0
C21orf88__chr21	10	5	6	0	6	3	9	9	9	3	0	2
C21orf90__chr21	0	0	0	0	0	1	0	1	0	0	0	0
C21orf91__chr21	33	19	41	7	15	12	25	66	30	29	2	4
C22orf23__chr22	11	1	10	0	3	1	2	9	6	4	0	1
C22orf24__chr22	0	0	1	0	0	0	1	1	1	0	0	0
C22orf28__chr22	390	260	365	67	151	175	275	501	218	206	14	31
C22orf29__chr22	111	94	123	14	52	67	96	152	93	101	12	13
C22orf32__chr22	423	264	530	79	190	169	443	798	615	617	53	90
C22orf34__chr22	0	0	0	0	0	0	0	0	1	0	0	0
C22orf39__chr22	219	107	183	37	64	70	164	307	141	124	6	23
C22orf43__chr22	1	0	0	0	1	0	0	0	1	0	0	0
C22orf46__chr22	22	9	18	2	5	3	21	26	12	15	1	2
C2CD2L__chr11	10	16	20	3	6	5	15	20	21	22	1	1
C2CD2__chr21	70	24	49	8	16	15	30	64	30	16	0	1
C2CD3__chr11	3	1	5	0	2	0	0	4	0	2	0	0
C2CD4A__chr15	0	0	0	0	0	0	0	0	0	1	0	0
C2CD4B__chr15	1	2	0	0	0	0	0	0	0	0	0	0
C2CD4C__chr19	28	10	20	4	10	10	13	22	24	17	3	4
C2CD5__chr12	63	29	77	11	7	14	40	64	45	51	3	6
C2__chr6	0	0	2	0	0	0	0	4	0	2	0	0
C2orf15__chr2	1	2	0	0	1	0	1	7	7	7	0	0
C2orf27A__chr2	0	0	0	0	0	0	0	0	1	0	0	0
C2orf29__chr2	217	114	180	33	95	93	161	287	112	120	7	18
C2orf40__chr2	1	3	3	1	0	0	1	4	0	1	0	0
C2orf42__chr2	26	15	49	8	12	14	28	41	28	25	2	6
C2orf43__chr2	25	17	20	4	14	8	14	38	19	11	4	2
C2orf44__chr2	67	61	77	10	26	28	46	95	40	34	0	5
C2orf47__chr2	91	56	78	10	31	42	76	129	71	50	0	12
C2orf48__chr2	0	1	0	0	0	0	1	0	0	0	0	0
C2orf49__chr2	13	6	11	2	7	4	11	23	11	6	1	0
C2orf54__chr2	1	1	1	0	0	1	3	3	0	3	0	1
C2orf61__chr2	0	0	0	0	0	0	0	0	0	1	0	0
C2orf65__chr2	0	0	0	0	0	1	2	1	0	0	0	0
C2orf66__chr2	8	3	14	2	4	4	7	9	4	12	1	3
C2orf68__chr2	862	537	1008	170	199	229	508	879	498	533	35	74
C2orf69__chr2	214	121	234	49	68	66	178	311	135	127	19	22
C2orf71__chr2	0	0	1	0	0	0	2	0	0	0	0	0
C2orf72__chr2	19	8	38	7	2	2	25	21	6	14	1	0
C2orf73__chr2	0	0	0	0	0	0	0	1	1	1	0	0
C2orf74__chr2	46	26	51	5	10	22	22	51	35	24	0	4
C2orf76__chr2	7	0	5	2	3	6	0	4	3	2	1	0
C2orf80__chr2	16	8	26	4	6	2	25	28	50	63	5	10
C2orf81__chr2	34	18	25	8	5	7	19	30	31	21	0	1
C2orf82__chr2	0	0	0	0	0	1	1	0	0	0	0	0
C2orf83__chr2	0	0	0	0	0	0	0	0	0	0	0	1
C2orf88__chr2	3	0	0	0	2	0	2	0	2	2	2	0
C2orf91__chr2	5	2	2	1	2	1	2	7	4	15	6	3
C3AR1__chr12	0	0	1	0	0	1	1	1	2	0	0	0
C3orf14__chr3	60	34	59	10	33	36	80	110	37	46	4	6
C3orf17__chr3	114	83	130	11	53	50	101	153	85	77	5	14
C3orf18__chr3	11	5	23	1	3	1	4	23	7	12	0	4
C3orf20__chr3	0	0	0	0	0	0	0	0	1	0	0	0
C3orf27__chr3	0	0	0	0	0	0	0	0	0	1	1	0
C3orf33__chr3	19	27	39	10	6	14	33	45	17	22	1	9
C3orf35__chr3	13	4	10	0	2	0	6	3	11	6	1	1
C3orf36__chr3	0	0	0	0	0	0	1	0	0	0	0	0
C3orf37__chr3	57	34	45	6	10	19	28	60	23	35	0	2
C3orf38__chr3	75	50	74	20	32	26	57	112	47	25	4	7
C3orf43__chr3	1	0	1	0	0	0	0	1	2	1	0	0
C3orf45__chr3	0	0	0	0	0	0	0	1	0	0	0	0
C3orf49__chr3	0	0	0	0	0	0	0	1	0	0	0	1
C3orf52__chr3	1	3	1	0	2	5	1	4	6	3	0	0
C3orf55__chr3	1	0	0	0	0	0	0	0	0	0	0	0
C3orf58__chr3	170	87	123	20	50	59	102	222	105	75	8	5
C3orf62__chr3	136	94	204	26	47	53	117	235	160	152	9	42
C3orf65__chr3	0	0	0	0	0	0	0	1	0	0	0	0
C3orf67__chr3	0	0	3	2	2	1	1	3	0	3	0	2
C3orf70__chr3	25	15	66	5	8	5	47	63	35	48	5	13
C3orf72__chr3	3	2	8	0	0	1	3	8	3	4	12	1
C3orf80__chr3	1	0	0	0	0	0	0	0	0	2	0	0
C4orf19__chr4	2	1	2	1	1	1	0	3	2	3	1	1
C4orf21__chr4	12	6	10	1	2	6	11	6	0	5	1	0
C4orf22__chr4	0	0	3	0	0	0	0	0	0	0	0	0
C4orf26__chr4	3	5	4	1	8	1	2	0	24	2	4	0
C4orf27__chr4	262	193	279	49	77	79	146	309	137	152	15	29
C4orf29__chr4	3	4	7	0	2	0	2	4	7	4	0	0
C4orf32__chr4	4	6	0	0	4	1	1	8	0	2	0	0
C4orf33__chr4	14	11	13	1	10	5	9	24	15	11	2	2
C4orf36__chr4	0	0	0	0	0	0	0	2	0	2	0	0
C4orf3__chr4	264	174	312	36	116	148	209	417	215	172	8	28
C4orf40__chr4	0	0	0	0	0	0	0	1	0	0	0	0
C4orf46__chr4	101	60	102	17	35	26	48	109	60	54	4	6
C4orf47__chr4	1	3	1	0	0	0	3	1	0	1	0	0
C4orf48__chr4	117	77	149	20	45	45	131	176	175	145	15	50
C4orf52__chr4	144	100	129	16	83	99	112	221	75	59	5	15
C4orf6__chr4	0	0	0	0	0	0	0	0	3	0	0	0
C5AR1__chr19	4	6	15	2	7	3	12	30	15	12	0	1
C5__chr9	24	7	33	1	0	3	6	17	1	10	0	1
C5orf15__chr5	193	129	174	44	93	105	156	233	170	148	8	16
C5orf22__chr5	175	99	130	30	67	98	116	237	99	91	7	17
C5orf24__chr5	554	305	625	130	237	220	485	822	519	439	46	95
C5orf27__chr5	0	1	0	0	0	0	0	0	3	0	0	1
C5orf28__chr5	10	11	17	8	5	7	19	26	6	10	0	3
C5orf30__chr5	259	164	235	22	43	62	105	162	116	156	4	9
C5orf34__chr5	17	5	14	1	4	11	3	9	3	6	1	1
C5orf38__chr5	2	4	3	0	1	3	1	5	2	3	0	0
C5orf42__chr5	30	17	41	5	7	13	31	52	29	33	3	1
C5orf44__chr5	62	40	79	11	41	27	60	128	89	77	9	8
C5orf45__chr5	1	0	0	0	0	0	0	0	0	0	0	0
C5orf46__chr5	0	0	0	0	6	2	0	6	9	2	0	0
C5orf47__chr5	0	0	0	0	0	0	0	0	0	2	0	0
C5orf48__chr5	0	0	1	0	0	0	0	0	0	0	1	0
C5orf49__chr5	10	5	13	2	2	3	12	11	4	6	0	0
C5orf4__chr5	7	11	9	2	3	8	2	5	2	5	0	0
C5orf51__chr5	243	117	268	38	60	51	192	315	140	119	11	21
C5orf54__chr5	31	15	29	6	7	8	29	43	21	19	2	2
C5orf55__chr5	27	20	44	7	9	23	25	60	16	28	0	5
C5orf56__chr5	5	4	14	4	5	3	3	8	4	5	0	0
C5orf60__chr5	0	0	0	0	0	1	0	0	0	0	0	0
C5orf63__chr5	4	1	8	0	1	4	4	5	0	5	3	0
C5orf64__chr5	0	2	1	0	0	0	1	1	6	2	1	0
C6__chr5	1	0	0	0	0	1	1	0	0	1	0	1
C6orf106__chr6	99	51	54	13	31	38	48	106	80	61	8	9
C6orf10__chr6	0	0	0	0	0	2	0	0	0	0	0	0
C6orf118__chr6	5	3	4	1	4	0	0	3	2	0	0	0
C6orf120__chr6	83	48	84	6	26	27	53	116	43	40	3	0
C6orf123__chr6	0	0	0	0	0	0	0	0	0	1	0	0
C6orf132__chr6	0	2	3	0	1	1	1	0	2	0	0	0
C6orf136__chr6	102	64	124	12	39	24	61	119	87	81	6	9
C6orf141__chr6	2	0	3	0	0	3	1	2	0	0	0	0
C6orf147__chr6	1	0	3	0	1	0	0	10	0	0	0	1
C6orf15__chr6	1	0	4	1	0	0	1	1	0	1	0	0
C6orf163__chr6	8	4	8	1	0	0	3	8	4	1	0	1
C6orf164__chr6	0	1	2	1	0	1	1	3	0	1	0	0
C6orf165__chr6	5	1	3	3	2	0	2	2	4	2	0	0
C6orf170__chr6	16	6	14	2	2	5	8	16	22	15	1	1
C6orf1__chr6	21	28	32	4	12	5	34	65	64	42	7	6
C6orf203__chr6	167	85	184	32	54	48	149	229	136	146	16	27
C6orf211__chr6	25	30	28	6	17	20	27	32	28	19	2	1
C6orf222__chr6	0	0	0	0	0	0	0	0	0	1	0	1
C6orf223__chr6	0	0	0	0	0	1	0	0	0	1	0	0
C6orf226__chr6	61	38	83	13	24	31	77	120	68	63	5	12
C6orf25__chr6	1	0	0	0	0	0	0	5	0	0	0	0
C6orf47__chr6	34	12	12	4	10	8	12	45	23	14	0	5
C6orf48__chr6	444	261	536	80	268	258	482	779	481	472	49	81
C6orf52__chr6	15	6	4	1	6	3	11	16	12	9	1	0
C6orf57__chr6	18	12	10	1	5	6	14	25	7	6	0	1
C6orf58__chr6	0	0	0	0	0	0	0	1	0	0	0	0
C6orf62__chr6	208	135	274	49	111	127	263	485	240	217	21	45
C6orf70__chr6	36	19	40	4	13	13	29	49	23	33	4	4
C6orf89__chr6	127	75	158	27	43	78	98	196	126	112	6	26
C6orf99__chr6	1	0	6	0	0	6	0	2	1	1	0	1
C7__chr5	0	1	0	0	0	0	0	1	1	0	0	0
C7orf10__chr7	13	7	20	4	7	9	5	29	9	4	0	1
C7orf13__chr7	83	55	116	12	34	61	106	150	134	131	14	21
C7orf25__chr7	15	8	15	2	6	10	14	33	18	9	0	0
C7orf26__chr7	51	33	55	4	21	15	45	63	57	46	7	7
C7orf29__chr7	1	2	0	0	1	1	0	3	1	1	0	0
C7orf31__chr7	14	11	16	0	14	10	9	15	10	4	0	2
C7orf33__chr7	0	0	0	0	0	0	0	1	1	0	0	0
C7orf41__chr7	236	150	549	56	62	92	374	567	499	474	54	64
C7orf43__chr7	21	12	36	0	6	8	13	44	34	20	3	4
C7orf45__chr7	0	0	0	0	1	0	1	0	0	0	0	0
C7orf49__chr7	22	6	20	1	5	10	12	25	8	15	1	0
C7orf50__chr7	498	299	354	50	281	276	504	959	353	368	28	51
C7orf53__chr7	40	22	39	9	12	25	16	37	16	23	0	1
C7orf55-LUC7L2__chr7	0	0	2	0	0	0	1	1	1	0	0	0
C7orf55__chr7	166	95	168	22	50	63	107	193	74	117	15	16
C7orf60__chr7	94	51	94	13	30	41	69	81	114	90	9	16
C7orf61__chr7	5	4	4	2	15	19	10	20	9	20	0	1
C7orf62__chr7	0	0	0	0	0	0	0	0	0	1	0	0
C7orf63__chr7	11	3	12	1	2	0	4	3	0	3	1	1
C7orf65__chr7	0	0	0	0	0	1	1	0	0	0	0	1
C7orf66__chr7	0	0	0	0	0	0	0	5	3	0	0	0
C7orf71__chr7	0	0	0	1	0	0	0	0	0	0	0	0
C7orf72__chr7	0	0	0	0	0	0	0	0	0	0	2	0
C7orf73__chr7	506	355	630	111	220	274	440	854	465	490	31	55
C7orf76__chr7	0	0	0	0	0	0	0	0	1	0	0	0
C8A__chr1	0	0	0	0	0	0	0	0	0	0	0	1
[truncated: 15,799 more rows]
