# Supplementary material for: Quantitative mapping of transcriptome and proteome dynamics during polarization of human iPSC-derived neurons
Source: bioRxiv preprint, doi:10.1101/2020.04.21.052498, version 1 (2020-04-21)
Supplement: Table 2 [file 052498_file08.xlsx]

## Sheet: Sheet1
Gene_ID	day1_A1	day1_A2	day1_B1	day1_B2	day3_A1	day3_A2	day3_B1	day3_B2	day7_A1	day7_A2	day7_B1	day7_B2
NF1__chr17	7.60803	7.58306	7.94704	7.98793	7.20372	7.15094	7.48042	7.47864	8.10609	8.0436	8.36956	8.35402
HSD11B1L__chr19	6.15736	6.13754	6.1968	6.04805	5.77978	5.6062	5.74981	5.80475	7.40323	7.44305	7.52453	7.4574
CXCR4__chr2	6.2829	6.14477	6.4852	6.26623	4.51389	4.52985	4.73386	4.8397	3.32473	3.53851	3.76964	3.48778
KIAA0101__chr15	8.13645	8.09711	7.88945	7.92519	7.5352	7.52985	7.45146	7.3884	6.031	6.25242	5.76964	5.90281
NUSAP1__chr15	8.49408	8.48676	8.35183	8.24712	8.04044	7.80395	8.04776	7.77997	6.79105	6.65263	6.62763	6.51752
RFC3__chr13	5.95091	5.91877	5.63588	5.92519	5.3695	5.57614	5.26438	5.32951	4.30562	4.52081	4.09157	4.36224
USP1__chr1	5.45638	4.99277	5.23272	4.9569	5.16597	4.59125	4.87137	4.71974	4.26663	3.67281	3.76964	3.71017
KDM5B__chr1	6.19618	6.13754	6.44153	6.45571	6.2301	6.05068	6.55035	6.53541	7.10747	7.04824	7.32423	7.36224
MND1__chr4	8.47842	8.46958	8.15477	8.34023	8.15775	7.96048	8.10929	7.96547	6.78416	6.79934	6.67654	6.71017
SLC3A2__chr11	6.52913	6.59895	6.32804	6.58309	7.61343	7.87357	7.47083	7.54368	6.52388	6.59035	6.29321	6.32908
IGFBP2__chr2	7.77973	7.82284	7.81505	7.72796	8.14948	8.27073	8.13834	8.09809	7.27647	7.18096	7.29321	7.11227
FLJ22184__chr19	5.67979	5.89323	6.17234	5.71874	5.77978	5.8007	6.2307	5.96811	6.77377	7.02958	7.32423	7.01134
ZFP36L1__chr14	10.185	9.64302	9.75422	9.7048	9.67904	9.45234	9.49763	9.44278	8.22909	7.80301	7.62763	7.42637
UBE2C__chr20	8.25967	8.20309	7.83206	7.63301	7.86641	7.81042	7.43184	7.58661	6.45618	6.65263	6.16196	5.99028
FABP7__chr6	8.55508	8.55212	10.4013	10.2519	6.94175	6.6645	8.25044	8.14232	6.31521	6.32051	7.79201	7.44197
MCM7__chr7	9.30576	9.39118	8.82096	8.97637	8.7289	8.73421	8.48042	8.4189	7.90969	8.09085	7.577	7.77318
ALDH7A1__chr5	8.01625	8.07456	7.68136	7.77319	7.62937	7.46161	7.25044	7.22322	7.15629	7.02331	6.85711	6.76079
LMO3__chr12	4.55923	4.14477	5.13487	5.07719	3.97955	3.17621	4.73386	4.66015	6.52388	6.32051	7.05505	7.09264
BUB1B__chr15	6.68586	6.83183	6.51143	6.75527	6.40698	6.19611	5.87137	5.86254	5.031	5.03894	4.577	4.71017
YWHAG__chr7	7.73795	7.56431	8.01049	7.86797	8.2301	8.18371	8.43554	8.36326	8.77551	8.77061	8.99846	8.76079
PIP4K2B__chr17	7.86652	7.88893	8.17747	8.09867	7.7326	7.741	8.05419	7.91356	9.0548	9.02566	9.01757	9.15074
SNX5__chr20	5.84633	5.68083	6.15581	6.07719	5.51389	5.49814	5.9969	5.99936	4.48619	4.40978	4.577	4.60325
EIF1__chr17	8.76187	8.81493	8.72824	8.77319	9.55411	9.55318	9.43923	9.49213	9.41721	9.3971	9.22908	9.18821
MEST__chr7	7.03422	6.97665	6.65366	6.66216	7.23532	7.36384	7.09376	7.04667	6.52388	6.43362	6.22908	6.15074
H2AFZ__chr4	10.4279	10.3616	10.1184	10.1459	10.3102	10.1881	10.0118	9.86254	9.44694	9.20748	9.10056	9.22023
SEPT10__chr2	5.74524	5.57773	5.46521	5.18823	5.581	5.27307	4.96993	4.89982	4.60036	4.48474	4.35461	4.07274
TUBA1B__chr12	12.0335	12.0972	11.9048	11.9136	12.0881	11.9879	11.7668	11.6388	11.0915	11.1887	10.952	10.9321
NCOA6__chr20	5.49148	5.57773	5.56251	5.75527	5.07577	5.23511	5.38156	5.3512	6.25173	6.37572	6.22908	6.51752
FTL__chr19	9.01866	9.14026	8.65145	8.88042	10.3292	10.3726	10.3732	10.3385	9.25297	9.26178	9.14468	9.12681
CCNB2__chr15	7.97468	8.16625	7.46689	7.36408	7.3114	7.46572	7.32947	7.07302	5.99566	6.14674	5.85711	5.48778
HMMR__chr5	4.51896	4.38356	3.73939	3.24069	3.82201	3.70673	3.59956	3.06647	1.98369	2.08785	1.76964	0.902813
KIF20B__chr10	5.24225	5.17334	4.96495	5.13378	5.00422	4.621	4.59956	4.45504	3.46912	3.50289	3.35461	3.48778
GDF11__chr12	4.73356	4.52328	4.73939	4.5208	3.76543	3.70673	3.91444	3.8397	4.98369	4.64039	4.93957	4.71017
ZNF711__chrX	6.66756	6.6302	6.88945	6.80838	6.27132	6.32821	6.43184	6.27096	7.13479	6.99474	7.29321	7.18821
CHD3__chr17	6.72768	6.56161	7.09423	6.73712	6.61343	6.621	7.21643	6.72183	8.66926	8.62804	8.65229	8.39467
ID1__chr20	7.37224	7.08212	6.42782	6.24069	4.2915	4.49814	3.32947	3.5519	4.66176	3.79567	3.35461	2.90281
UBB__chr17	10.0375	9.90073	10.1535	10.2835	10.1571	10.0189	10.2232	10.3633	9.73412	9.64193	9.91939	9.94447
REEP1__chr2	4.81341	5.29533	6.0299	5.98793	5.05231	4.81364	5.89306	5.55658	7.35525	7.57113	8.05505	7.84533
RGMB__chr5	4.49148	4.45511	5.07457	5.13378	4.84949	4.621	5.09999	5.0599	6.52801	6.56466	6.62763	6.68417
MCM3__chr6	7.23813	7.23901	6.96495	7.04805	6.25086	6.20596	6.11238	6.12116	5.16426	4.81032	4.35461	5.07274
KIF22__chr16	6.74814	6.56701	6.42092	6.13378	6.07577	6.09375	5.97672	5.85876	5.12119	5.27899	4.76964	4.8097
SLC9A7__chrX	4.25047	4.33381	4.12641	4.34023	4.07577	3.96048	3.73386	4.16776	4.98369	4.90888	4.93957	5.15074
SFRP1__chr8	9.04193	8.89645	9.5332	9.44736	7.91923	7.74775	8.1489	7.78097	7.0368	7.18377	7.19591	7.1696
ALG8__chr11	5.18336	5.18742	4.59966	4.75527	5.25086	5.38133	5.02337	5.0599	4.0768	3.8814	3.76964	3.71017
GNG5__chr1	8.66372	8.95727	8.28497	8.44457	8.8341	9.21817	8.4636	8.66882	7.5925	7.49384	6.72384	6.83355
VAT1__chr17	6.89171	6.9807	7.03217	6.80838	7.26112	7.31007	7.03317	6.99247	8.09917	8.10874	7.9791	8.06268
CSTB__chr21	7.04134	6.95624	6.59046	6.47773	7.23532	7.26838	6.90735	6.8682	6.63904	6.63629	6.29321	6.29513
ANP32B__chr9	7.9357	7.77704	7.53879	7.59321	7.56036	7.741	7.27268	7.26382	6.84167	6.97862	6.62763	6.57524
SLC4A5__chr2	0.791043	0.0858784	1.71702	0.433339	1.12157	0.591249	2.1489	0.744546	3.031	2.8814	3.76964	3.22474
GABRB3__chr15	5.21731	4.6302	5.60576	5.60326	5.02846	4.70673	5.53663	5.45504	6.07115	5.88832	6.52453	6.4574
NR2E1__chr6	5.60482	5.40781	5.6943	6.29132	4.4435	4.43255	4.96993	5.0533	3.72066	3.8814	4.09157	4.22474
SLC25A4__chr4	7.67369	7.7583	7.83855	7.93318	8.07286	8.1122	8.28504	8.23275	8.46697	8.42413	8.52453	8.7483
TOP2A__chr17	7.61918	7.61726	7.63886	7.49943	7.23532	6.86427	7.35575	7.10689	6.25173	6.25242	6.29321	6.18821
FAM84B__chr8	9.29785	9.3782	8.49427	8.78207	9.21697	9.49212	8.47323	8.99463	7.79961	7.71818	7.2615	7.18821
HMGB2__chr4	6.85174	6.79554	6.80977	6.60326	6.50528	6.64291	6.72179	6.77697	5.12119	5.34083	5.09157	4.8097
HNRNPA2B1__chr7	9.46303	9.29777	9.42653	9.45293	9.27259	9.33944	9.35445	9.45222	8.71614	8.73842	8.85711	8.8915
RRM2__chr2	7.93952	7.97056	7.5356	7.51015	7.22486	7.04521	7.21355	6.96811	5.85159	6.05748	6.01757	5.54667
TOMM5__chr9	6.63653	6.69567	6.56251	6.49943	6.77978	6.99497	6.79276	6.79093	6.09361	5.93585	5.93957	5.90281
ZFP14__chr19	4.09482	4.38356	4.64775	4.68127	3.92893	3.76117	4.24201	4.28511	5.18533	5.31024	5.577	5.42637
FEN1__chr11	7.21521	6.95213	6.82293	7.0183	6.7289	6.16616	6.0749	6.192	5.60818	5.19219	5.47008	5.15074
TTYH1__chr19	8.98826	8.71402	8.86486	8.43334	7.18766	7.01191	7.68909	7.37655	6.21635	6.15824	6.76964	6.36224
METTL9__chr16	7.66295	7.53983	7.6566	7.74622	7.256	7.08844	7.43923	7.3404	8.14558	7.98831	8.1272	8.36224
ARRDC3__chr5	5.2829	5.41978	5.56251	5.24069	6.72149	6.93702	7.07173	6.83201	6.21635	6.64856	6.52453	5.94721
NAGK__chr2	6.63967	6.61466	6.78041	6.66216	6.68382	6.41568	6.80807	6.65144	7.25422	7.13224	7.38435	7.36224
SS18L1__chr20	5.53251	5.65066	5.8463	5.47773	5.51389	5.83918	5.95626	5.72806	6.84498	6.84984	6.85711	6.94721
GGCT__chr7	5.81895	5.85847	5.72264	5.64279	5.49661	5.72053	5.53663	5.39886	4.61596	4.42889	4.09157	4.36224
MYBL2__chr20	5.53251	5.3589	4.76141	4.82566	5.4435	5.02865	4.37129	4.77697	4.00754	4.01385	3.35461	3.22474
PBX3__chr9	7.91646	7.74409	8.97205	8.9725	7.67999	7.77447	8.68392	8.39755	9.27463	9.33957	10.162	10.44
BCL11A__chr2	5.64902	5.8138	7.08988	6.8596	5.07577	5.27307	6.86772	6.69026	7.41665	7.60932	8.44207	8.57524
KIF2C__chr1	5.55259	5.50092	5.16823	5.29132	4.92893	5.13557	4.96993	4.97161	3.83169	3.93585	3.35461	3.22474
RUFY3__chr4	6.75971	6.71524	7.12003	7.16126	6.27132	6.44091	7.06219	6.79291	7.92229	7.94914	8.19591	8.06268
HSP90B1__chr12	7.51043	7.22543	6.78848	6.9569	7.98885	7.98357	7.78698	7.62162	6.72066	6.28948	6.22908	6.26036
PHF19__chr9	5.55259	5.94386	5.50492	5.75527	5.2301	5.43255	5.1489	5.02658	3.60036	3.76592	2.76964	3.48778
ECI1__chr16	5.86786	5.86724	5.45848	5.79089	5.794	5.6062	5.61705	5.598	4.24673	4.42889	4.35461	4.48778
HNRNPA3__chr2	8.10846	8.11378	8.1968	8.06996	8.01639	7.88587	7.95626	7.91993	7.64285	7.62597	7.74692	7.6577
UROD__chr1	5.48453	5.4667	5.2484	5.34023	5.66073	5.57614	5.41194	5.62941	5.06549	4.81032	4.577	4.8097
CDK2AP1__chr12	9.31166	9.3927	9.27783	9.35518	9.10741	9.15984	9.05579	8.98988	8.40435	8.2403	8.32423	8.49527
DLGAP5__chr14	6.08106	6.0323	5.79917	5.98793	5.27132	5.19611	5.35054	5.20398	4.031	4.1117	3.35461	3.90281
MRPL3__chr3	7.3835	7.38661	7.07457	7.09155	7.51389	7.60991	7.27543	7.37919	6.58063	6.50739	6.35461	6.60325
PDZD4__chrX	5.14859	4.85847	5.4105	5.60326	4.51389	4.81364	5.09999	5.09247	6.48619	6.73555	6.85711	6.71017
NREP__chr5	6.84089	6.73932	7.5578	7.37585	6.43446	6.38999	7.3	7.02321	8.4211	8.49724	8.67654	8.69072
ZNF503__chr10	5.39096	5.60944	7.45003	7.07719	5.80807	5.77447	7.30271	7.24801	8.71161	9.1117	9.577	10.1555
RNF111__chr15	3.83544	3.6302	3.76141	3.60326	4.12157	3.91318	4.52741	4.06647	4.90969	4.72012	5.09157	4.8097
TTC3__chr21	6.66449	6.53434	6.87689	6.70013	6.62142	6.19611	6.67246	6.67313	7.77029	7.76592	7.72384	7.8686
LOC728392__chr17	6.64591	6.52328	6.59046	6.66216	7.02244	6.86427	6.69734	6.66666	7.68967	7.556	7.62763	7.72299
ST3GAL5__chr2	4.5724	4.52328	5.24058	5.13378	4.87646	5.19611	5.38156	5.33496	5.90335	5.96886	6.35461	6.26036
LAPTM4B__chr8	7.57404	7.50373	7.31321	7.17481	7.91923	7.7308	7.78698	7.70718	6.82163	6.81032	6.62763	6.26036
PFN1__chr17	11.8232	11.7041	11.3434	11.0808	12.2226	12.2151	11.8226	12.0182	11.0426	10.7862	10.5834	10.4746
POLR2K__chr8	8.16391	8.15017	8.07347	8.25352	8.7582	8.79582	8.70451	8.71557	7.94562	8.1264	8.10949	8.07274
ECI2__chr6	6.63967	6.72492	6.7858	6.75527	6.18766	6.41568	6.36095	6.192	5.77724	5.61559	5.577	5.54667
BEND4__chr4	2.03897	0.500916	2.30198	2.0183	1.70654	0.591249	2.1489	2.192	3.74923	3.46636	4.93957	4.60325
YPEL3__chr16	6.0005	6.15197	6.49838	6.18823	5.66073	5.6062	5.87137	5.71557	6.5846	6.57756	6.72384	6.78546
RPS6__chr9	11.4271	11.6164	11.4894	11.4994	11.7189	11.9607	11.9664	11.9027	10.851	11.1838	11.2715	11.0022
JPH4__chr14	3.40575	3.6302	5.1179	4.60326	3.82201	3.59125	5.25324	4.66015	6.71343	6.76967	7.22908	7.27785
CACNB3__chr12	5.80227	5.59895	5.82031	5.56262	5.581	5.29169	5.90735	5.49943	7.12119	7.0544	7.09157	7.37855
TACC3__chr4	7.05783	7.05166	6.7858	7.04805	6.42535	6.52199	6.1549	6.27096	5.11022	5.39041	4.577	5.48778
UCHL1__chr4	10.3148	10.3916	10.527	10.5982	10.5846	10.7557	10.9831	11.0662	11.2908	11.2352	11.4683	11.3592
KIDINS220__chr2	7.58221	7.63277	8.49427	8.2147	7.70654	7.9807	8.46239	8.07546	9.04403	9.40737	9.58343	9.62733
PGM2L1__chr11	4.26678	4.4782	5.10934	4.60326	4.61343	4.621	4.5088	4.40406	6.31521	6.35588	6.577	6.29513
TCF20__chr22	4.34563	4.3589	4.64775	4.43334	4.51389	4.65014	4.71774	4.57052	5.6237	5.7432	5.577	5.94721
SLC25A13__chr7	6.64591	6.38356	6.01164	5.82566	6.35039	6.55318	5.95626	5.64706	5.54441	5.50289	4.76964	4.60325
ASNS__chr7	4.97095	4.67084	4.88694	4.9569	5.92893	5.77447	5.84934	6.20099	6.00161	5.98831	6.16196	6.6577
PDLIM5__chr4	7.34563	7.1698	7.0412	7.04805	6.84267	6.89503	6.56394	6.64925	6.25671	6.04514	5.47008	5.76079
TPX2__chr20	7.19831	7.3147	6.91177	6.9569	6.78691	6.80719	6.56394	6.57283	5.38058	5.70452	5.76964	5.29513
LRCH2__chrX	5.86251	5.56701	6.04345	6.31598	6.01639	5.49814	6.0875	6.03331	7.05408	7.17248	7.4135	7.4574
EI24__chr11	8.83612	8.83965	8.76004	8.59321	9.13699	9.07909	9.0291	9.00108	8.75099	8.77808	8.68851	8.56102
EMP2__chr16	5.49148	5.57773	5.25618	5.18823	4.64513	4.73421	4.45146	4.43486	2.98369	3.8814	3.35461	2.90281
EFEMP2__chr11	3.85713	3.89323	3.82554	3.89277	4.12157	3.76117	3.94245	4.1431	2.83169	2.98831	2.76964	2.90281
GLI2__chr2	5.02945	4.84077	4.8463	5.43334	4.12157	4.46572	4.21929	4.85497	3.0768	3.39041	2.76964	3.22474
RPRD2__chr1	5.95595	5.98473	6.36087	6.43334	5.46142	5.6062	5.76557	5.84736	6.28625	6.34587	6.4135	6.60325
RBM3__chrX	9.10789	9.06887	9.12109	8.85119	9.91761	10.0238	9.92895	10.0308	8.89218	8.86658	9.10056	8.6776
RPA1__chr17	6.67979	6.74884	6.76959	6.77319	6.2301	6.22546	6.68495	6.36193	5.45184	5.58184	5.47008	5.54667
AURKB__chr17	8.65523	8.70181	8.14852	8.40488	7.92893	7.632	7.43677	7.54132	6.19574	6.82842	6.35461	6.18821
COL2A1__chr12	5.2829	5.24238	4.20887	4.24069	4.25086	4.21574	3.66828	3.43486	2.88416	2.57328	1.76964	0.902813
SPAST__chr2	5.2829	5.07077	5.62391	5.5208	5.18766	4.96048	5.66828	5.46999	6.07115	5.92915	6.29321	6.54667
TWSG1__chr18	6.07644	5.79554	5.88192	5.98793	6.2915	5.96048	6.17275	6.04	5.3622	4.8814	5.35461	4.99028
CDKN1A__chr6	8.18229	7.89323	7.37344	8.18153	9.70277	9.69803	9.25184	9.80721	8.50725	8.03427	7.72384	7.83355
KIF3A__chr5	3.69793	3.54531	4.38944	4.34023	3.92893	3.25421	4.12465	3.8397	5.16426	5.24705	5.93957	5.90281
LRRC3B__chr3	2.79104	2.96035	4.8463	4.82566	2.82201	2.17621	4.58186	4.44499	6.14289	5.95575	7.35461	6.92518
RPS27L__chr15	9.55881	9.43903	9.42092	9.41062	9.77978	9.57899	9.79324	9.5592	8.97162	8.46867	8.85711	8.56815
ZNF25__chr10	2.64902	2.40781	3.03895	2.43334	2.70654	2.32821	2.70144	2.71138	3.80472	3.76592	4.09157	3.71017
TCF7L1__chr2	7.48975	7.42869	6.94824	6.54186	6.53096	6.61362	6.43677	6.37258	5.69885	5.6808	5.22908	4.99028
PSMB1__chr6	9.33214	9.19701	8.93437	8.83848	9.54574	9.53279	9.43923	9.40665	8.80302	8.69764	8.60253	8.56815
MZT1__chr13	7.17475	7.24575	6.86422	6.94113	7.30148	7.49814	6.87137	6.89982	6.58855	6.53411	6.22908	6.26036
TTI1__chr20	6.56912	6.56161	6.00242	5.89277	6.05231	5.76117	5.56394	5.23931	5.77724	5.6808	5.35461	5.15074
ORC6__chr16	5.82996	5.56701	5.36087	5.64279	5.18766	5.09375	4.61705	5.03331	4.34359	4.0636	3.35461	3.48778
TUBB4A__chr19	3.3146	3.45511	4.36087	3.43334	3.581	3.46572	4.1489	3.94333	5.45184	5.47558	5.67654	5.60325
SNX4__chr3	4.97095	4.91031	5.44494	5.43334	5.40698	5.34614	5.59956	5.70718	5.85816	5.81032	6.16196	6.4574
PRTG__chr15	8.32535	8.52328	7.14956	6.98793	7.34074	7.09904	5.94245	5.88503	6.16956	6.12347	5.577	5.07274
CNN3__chr1	7.06017	7.05166	7.12216	7.3037	7.17686	7.11481	6.96993	7.40535	6.34826	6.08183	6.29321	6.29513
RASA4__chr7	2.74524	2.58838	3.20887	2.75527	2.82201	2.32821	2.88587	2.80868	4.031	3.93585	4.09157	3.90281
CMIP__chr16	4.90998	4.78632	5.41746	5.0183	5.02846	4.83918	5.21929	4.95754	6.1375	6.49837	6.62763	6.11227
PAFAH1B1__chr17	6.87585	6.71037	6.73104	6.60326	6.84949	6.85178	6.76949	6.72391	7.22401	7.16964	7.09157	6.9689
CSRP1__chr1	7.8838	8.1193	7.95303	7.98023	9.46031	9.3372	9.02828	9.4854	7.86796	7.55817	7.81404	7.58931
GPN1__chr2	5.03897	5.13027	4.79383	4.5208	5.96706	5.8007	5.5088	5.59345	4.5846	4.73555	4.35461	3.90281
DCLK1__chr13	5.0005	5.00871	5.91669	5.75527	4.90293	4.96048	5.90735	5.46999	6.11572	6.34083	6.9791	6.4574
USF2__chr19	5.44925	5.29533	5.52437	5.13378	5.09885	5.09375	5.2078	4.93617	5.64666	5.66477	5.93957	5.60325
TAGLN__chr11	7.58708	7.74647	6.66246	7.04805	9.81419	9.87125	8.95797	9.23165	8.50725	7.81032	7.38435	7.07274
DLK1__chr14	11.0528	10.8161	8.93619	9.08797	10.2438	9.57424	8.42441	8.23056	9.37773	9.12933	7.52453	7.20659
APBB1__chr11	6.45993	6.50092	6.56877	6.62316	6.2301	6.12523	6.54579	6.25953	7.02224	7.24435	7.44207	7.22474
LTBP1__chr2	6.15736	6.32746	5.56877	5.5208	6.25086	6.03971	5.26438	5.36193	5.11022	5.18096	4.577	4.22474
CTPS2__chrX	6.20467	6.2558	5.90189	5.89277	5.66073	5.36384	5.32947	5.1306	5.24673	5.26842	4.76964	4.90281
AMN1__chr12	3.03897	2.67084	2.80448	3.60326	3.02846	2.91318	3.1489	3.47494	4.38058	4.22535	4.577	4.60325
CD24__chrY	9.44881	9.47963	10.1158	9.9111	9.5562	9.64834	10.2765	9.92671	11.4627	11.4078	11.3546	11.6375
GINS4__chr8	4.39096	4.56701	3.59966	3.60326	3.3695	4.13557	3.32947	3.62496	1.98369	2.50289	1.76964	1.90281
ATP6V1A__chr3	7.78681	7.77238	7.92891	7.99558	7.77621	7.78765	7.92851	7.93437	8.60818	8.533	8.48389	8.51014
KIF5B__chr10	6.82996	6.81833	6.80977	6.80838	7.04044	6.98357	7.0135	6.97686	7.22909	7.07578	7.09157	7.11227
LSAMP__chr3	4.37601	4.22884	5.3965	5.29132	3.20904	3.25421	4.28641	3.97161	4.87122	5.66477	6.16196	6.26036
IL17RD__chr3	4.80227	4.52328	5.61788	5.43334	4.20904	4.29169	5.04937	4.73633	5.6237	5.64039	6.35461	5.90281
LPHN3__chr4	5.13089	5.57773	5.54357	5.07719	5.2915	5.3986	5.46118	5.26239	6.08803	6.21988	6.47008	5.99028
QKI__chr6	8.22567	8.09711	8.63514	8.77319	7.73996	7.61362	7.89127	7.76489	6.96554	6.96232	7.16196	7.42637
PIR__chrX	6.27486	5.99277	5.92159	6.36408	6.3695	6.56853	6.77729	6.46999	4.43435	4.76592	4.577	4.90281
DARS__chr2	6.89695	6.88029	6.76414	6.70013	6.66073	6.65734	6.46118	6.58432	5.916	6.0697	5.47008	5.8097
RBPMS__chr8	7.52066	7.56701	6.7965	7.07719	7.90948	8.1122	7.43677	7.66124	6.86796	6.65669	6.01757	5.90281
MED14__chrX	5.53251	5.60944	5.72824	5.60326	5.42535	5.52985	5.28641	5.3404	4.63139	4.6239	4.35461	4.22474
BCAR3__chr1	7.32242	7.33064	7.05464	7.16126	7.08736	6.65734	6.89665	7.06811	6.11022	5.70452	5.47008	5.60325
SEPT2__chr2	8.27989	8.21	8.04232	8.17481	8.26368	8.40075	7.98348	8.01473	7.58658	7.69863	7.35461	7.29513
KLHDC10__chr7	4.95091	4.89323	5.44494	5.34023	5.25086	5.32821	5.47083	5.29074	5.95944	6.1117	6.35461	6.26036
TMBIM6__chr12	7.5887	7.56431	7.30386	7.75527	8.22224	8.23511	7.94072	8.09729	7.17483	7.23081	6.67654	6.90281
PSAT1__chr9	8.83475	8.86833	8.75594	8.56262	8.86977	8.82327	8.95196	9.05743	7.86796	7.9541	7.91939	7.79763
PPIA__chr7	12.0281	11.9717	11.7979	11.9836	12.1791	12.066	12.085	12.0488	11.4127	11.3149	11.3584	11.5458
CELSR1__chr22	6.01986	6.00076	5.4918	5.34023	5.75093	5.41568	5.43184	5.23931	4.53623	4.1117	3.35461	3.48778
PLXNA2__chr1	2.4349	1.96035	3.73939	3.0183	2.12157	1.59125	3.59956	3.26239	5.09917	5.49384	6.01757	5.76079
TMEM198__chr2	4.26678	3.45511	4.73939	4.60326	4.16597	3.46572	4.85672	4.57973	5.27647	5.02645	5.85711	5.6577
MIEN1__chr17	6.81895	6.74409	6.75319	6.60326	7.02846	7.07238	7.26992	7.1037	7.42995	7.41697	7.65229	7.48778
SCG3__chr15	4.0005	4.0555	5.04793	4.34023	4.54784	4.13557	5.26438	4.95045	5.93478	6.1117	6.52453	6.07274
CKAP2__chr13	7.16825	6.96035	6.79383	6.70013	6.76543	6.64291	6.54122	6.40665	5.85159	5.72785	5.76964	5.90281
CDH4__chr20	6.50872	6.53434	6.8463	6.45571	5.14394	5.17621	5.31883	5.43993	6.0768	6.10577	6.577	6.60325
TMEM38B__chr9	4.29884	4.0555	2.62391	3.24069	4.02846	3.70673	2.56394	2.67743	2.98369	2.70452	1.76964	1.90281
LPPR2__chr19	4.34563	4.2558	5.06575	4.68127	4.82201	4.65014	5.28641	4.97161	6.50725	6.4893	6.35461	6.6577
PLTP__chr20	6.37976	6.41978	6.57189	6.2147	6.47912	6.58372	6.63433	6.42211	5.51974	5.57328	5.22908	4.99028
PPP1R9B__chr17	3.67369	3.82284	3.86676	3.60326	3.70654	3.3986	3.88587	3.87008	4.94717	4.81032	5.22908	4.8097
MT2A__chr16	7.61282	7.64812	7.26005	7.70946	6.06409	5.98357	5.29729	5.31302	4.61596	4.37078	4.93957	4.60325
MAP4K4__chr2	7.23606	6.97665	7.25424	7.38754	7.19839	7.31007	7.43184	7.44751	7.85323	7.92074	7.9791	8.06268
LAMA1__chr18	5.76259	6.13027	6.36087	6.18823	4.3695	4.70673	5.25324	5.07953	3.43435	3.13515	4.577	3.71017
CDV3__chr3	5.9357	5.71037	5.72824	5.68127	6.52245	6.26367	6.04937	6.18296	5.77029	5.61559	5.577	5.42637
GPX1__chr3	7.1242	7.10825	6.81505	6.84273	7.7326	7.70673	7.82133	7.79291	6.59644	6.43835	6.62763	6.22474
H2AFV__chr7	7.359	7.51772	7.32064	7.34023	7.28648	7.31007	7.23353	7.1431	6.63522	6.5429	6.76964	6.48778
MLLT4__chr6	7.02945	6.67584	7.18054	6.92519	6.49661	6.13557	6.77729	6.66666	7.50725	7.50739	7.67654	7.671
C14orf119__chr14	5.94586	5.7583	5.5372	5.79089	6.17686	5.88893	5.85672	5.83201	5.52801	5.27899	5.22908	5.15074
NCAPD2__chr12	6.3609	6.04007	5.80448	5.9569	6.12157	5.48202	5.54579	5.4144	4.79105	4.65669	4.76964	4.60325
NSG1__chr4	4.74524	4.6302	5.83596	5.8596	4.95446	4.70673	6.02991	5.598	7.0368	7.1611	7.44207	7.58931
TUBA1A__chr12	10.054	9.97513	10.3427	10.2535	10.2802	10.2435	10.5312	10.4488	11.221	11.28	11.1272	11.1684
GAS7__chr17	3.83544	3.89323	4.30198	4.0183	3.76543	3.86427	3.85672	3.94333	5.17483	5.53851	5.22908	5.07274
ETFB__chr19	5.82996	5.86724	6.1641	6.18823	5.42535	5.56088	6.36613	5.93975	7.32473	7.38063	7.4135	7.47267
ATP6V0A1__chr17	5.77404	6.0555	6.21287	5.71874	6.97955	6.621	6.81566	6.75476	7.32473	7.24974	7.47008	7.3122
MAML3__chr4	2.5984	2.67084	3.62391	3.24069	1.70654	2.46572	2.76557	2.32951	3.3622	4.03894	4.93957	4.48778
HDGFRP3__chr15	6.54593	6.44928	6.69716	6.5208	6.53096	6.31007	6.63433	6.61603	7.18794	7.06665	7.16196	7.37855
RHOA__chr3	8.3609	8.24238	8.20184	8.33421	8.56036	8.55703	8.33609	8.35322	7.93011	7.95575	7.65229	7.82168
DTL__chr1	5.41309	5.22884	5.19275	5.34023	4.794	4.25421	4.84192	4.45504	2.93478	2.70452	1.76964	2.48778
MYL12A__chr18	6.91775	6.79093	5.71137	6.13378	7.94812	8.12523	6.80807	7.12904	6.90017	6.36583	5.67654	5.8097
SV2A__chr1	6.87851	6.87596	7.3001	7.03325	6.97955	6.87047	7.36095	7.39886	8.4936	8.4836	8.35461	8.41061
EPB41L2__chr6	5.04843	4.94386	5.00242	5.75527	5.18766	5.09375	4.76557	5.52829	3.20608	3.46636	3.35461	4.48778
TMPO__chr12	7.67521	7.71766	7.50329	7.53137	7.09885	7.02865	7.13986	6.92536	6.68043	6.62804	6.85711	6.39467
DIAPH3__chr13	3.54593	3.02448	2.80448	2.43334	4.12157	3.52985	2.9969	3.32951	2.72066	2.35088	1.76964	1.90281
MYL6B__chr12	6.39096	6.30182	6.29066	6.2147	6.46142	6.31007	6.28093	6.1021	6.85159	6.95904	6.93957	6.88009
SCARB2__chr4	6.20043	6.28882	6.45173	6.31598	6.42535	6.621	6.67246	6.497	6.8647	6.92579	6.93957	6.7357
MESDC2__chr15	5.15736	5.14477	4.72824	4.60326	5.05231	5.07238	4.81187	4.82427	4.34359	4.40978	3.76964	3.71017
FBRSL1__chr12	6.04371	5.91031	6.20486	5.92519	5.2915	5.13557	5.86406	5.5425	6.47768	6.33071	6.89893	6.39467
RBBP7__chrX	7.01263	6.97259	6.82554	6.79089	6.58918	6.80719	6.66408	6.59118	6.09917	6.39528	6.09157	5.90281
MEAF6__chr1	5.72178	5.91877	6.20887	5.79089	5.72149	5.6645	6.225	6.02321	6.54441	6.60302	6.89893	6.76079
SCN3B__chr11	3.79104	3.89323	5.20083	4.60326	4.3695	4.56088	5.32947	5.03331	6.81489	6.8952	6.9791	6.78546
H2AFX__chr11	7.20255	6.91454	6.84887	6.77319	6.99809	6.50613	6.53203	6.15548	5.67671	5.51188	5.85711	5.29513
CD63__chr12	8.41126	8.38966	8.16617	8.10576	9.10314	9.20473	8.70042	8.82718	8.40098	8.06513	7.72384	7.90281
SMS__chrX	9.35947	9.40027	8.60652	8.59321	9.76272	9.59219	8.81471	8.89337	9.031	8.7432	7.85711	8.1602
AK4__chr1	4.72178	4.74884	4.19275	3.89277	3.97955	4.09375	3.82697	3.16776	3.32473	3.39041	2.76964	1.90281
NMU__chr4	6.66756	6.72008	6.33907	6.13378	6.80807	6.4575	6.3453	6.34311	5.28625	5.49384	5.35461	4.8097
PRICKLE1__chr12	2.79104	2.58838	2.52437	3.0183	2.12157	2.00629	1.70144	2.53304	3.88416	3.46636	3.76964	3.71017
LZTS1__chr8	3.03897	3.08588	3.96495	3.89277	3.92893	3.86427	4.47083	4.192	5.11022	4.79567	5.47008	5.07274
DLGAP4__chr20	6.9858	6.86286	6.77501	6.77319	6.82893	6.80719	6.87137	6.78097	8.0031	7.96232	7.52453	7.61706
DDAH1__chr1	9.70543	9.64557	9.56525	10.0089	9.93214	9.75448	9.68806	10.0019	8.78847	8.71429	8.73543	8.55386
FAM115A__chr7	4.14859	3.92718	4.47191	4.13378	3.76543	4.43255	4.58186	4.43486	5.29597	5.64039	6.16196	5.71017
MDM2__chr12	6.21731	6.00076	6.20083	5.92519	7.21433	7.12003	6.97672	6.77897	5.97162	5.98831	5.47008	5.6577
VGF__chr7	5.26678	5.11563	5.28687	5.24069	7.26623	7.40717	6.87137	7.01982	7.12937	7.05132	6.29321	6.4574
ALDOA__chr16	7.65678	7.77704	7.43126	7.56262	8.16049	8.17621	8.23778	8.43993	7.23415	7.19219	7.16196	7.11227
CHL1__chr3	3.34563	2.67084	4.14328	3.89277	2.82201	1.81364	4.21929	3.5519	6.41219	6.22535	6.47008	6.92518
PRKAR2B__chr7	5.47052	5.20136	5.64183	5.56262	5.53096	5.13557	5.42192	5.1306	6.66552	6.69666	6.52453	6.8097
CELF5__chr19	5.81341	5.59895	6.4918	6.58309	5.46142	5.13557	6.5774	6.19501	8.20092	8.21713	8.17904	8.60325
SF3B4__chr1	8.51896	8.49385	8.15477	7.87628	8.46587	8.45956	8.25044	8.16546	7.89218	7.7565	7.32423	7.27785
LY6H__chr8	1.25047	1.30827	1.80448	2.0183	1.70654	1.00629	2.70144	2.49457	4.26663	4.03894	4.577	4.22474
PDLIM1__chr10	7.45815	7.6302	6.87689	6.66216	8.28648	8.51804	7.48994	7.45879	7.27647	6.91905	6.29321	6.32908
CDT1__chr16	4.3302	4.08588	3.8463	4.5208	3.51389	3.32821	3.41194	3.45504	2.32473	2.50289	1.76964	1.90281
TSPAN13__chr7	6.70991	6.52328	7.42438	7.47773	6.81506	6.58372	7.33477	7.1647	7.92072	7.98186	8.27744	8.37855
HIP1R__chr12	4.21731	4.17334	4.6943	4.5208	3.2915	3.3986	4.24201	3.91447	4.87122	5.25777	5.35461	5.22474
GPC4__chrX	7.82447	7.72733	7.3262	7.31598	8.05526	8.05885	7.78891	7.93347	6.85816	6.52525	5.67654	6.18821
SHISA5__chr3	7.09254	7.02448	7.12853	6.9569	7.67232	7.35943	7.51814	7.63936	7.77724	7.58397	7.70038	7.68417
MED13L__chr12	3.21731	3.3589	4.31693	4.24069	3.2915	3.52985	4.09999	3.88503	4.30562	4.48474	5.09157	5.29513
RAI14__chr5	5.99561	6.06316	6.31693	6.43334	5.83582	5.73421	5.65986	5.6945	4.51974	4.90888	4.93957	4.90281
GINS2__chr16	6.5887	6.71037	6.32804	6.04805	5.88976	5.73421	6.0102	5.6558	5.09917	4.52081	4.76964	4.60325
VIM__chr10	11.5611	11.5899	11.7313	11.6561	11.94	11.9971	12.1251	12.4179	10.8419	10.7206	10.5898	10.5285
CCDC112__chr5	3.25047	3.96035	4.61184	4.43334	3.20904	4.00629	4.54579	4.22763	4.97162	5.33071	5.577	5.54667
TTC9B__chr19	2.64902	2.40781	3.73939	3.75527	2.70654	2.59125	4.1489	3.64267	5.51143	5.68875	5.85711	5.85701
SMO__chr7	5.58546	5.2691	5.01164	5.13378	4.70654	4.83918	4.1489	4.28511	3.93478	3.8814	2.76964	2.90281
CXXC4__chr4	6.16173	6.20828	5.50492	5.47773	5.25086	5.31007	5.04937	4.76893	6.29112	6.7432	6.01757	5.99028
NOP58__chr2	7.77404	7.74171	7.41225	7.47773	7.88312	7.75448	7.80234	7.58661	7.04547	6.98186	6.52453	6.42637
STK17A__chr7	4.98087	4.69074	5.91669	5.47773	5.581	5.21574	5.92851	5.55658	3.83169	3.8814	4.35461	4.22474
AUTS2__chr7	6.94586	7.09337	7.67121	7.74622	6.20904	6.31007	7.13986	6.74659	8.00013	8.30766	8.4135	8.23373
RHOT1__chr17	6.64591	6.65573	6.83076	6.84273	6.66847	6.741	6.90735	6.71138	7.29112	7.12054	7.551	7.34576
SCARA3__chr8	7.74814	8.00673	7.51468	7.5208	8.09599	7.98643	7.21929	7.1353	6.43435	6.40013	6.22908	5.71017
ACAA2__chr18	6.01021	6.20136	5.28687	5.47773	5.53096	5.59125	5.03643	5.04	4.51974	4.59035	4.35461	4.36224
RPS19BP1__chr22	5.41309	5.24238	5.20083	5.07719	5.94175	5.69279	5.74981	5.76893	5.69885	5.52969	5.35461	5.36224
PDS5B__chr13	4.75683	4.96035	5.07457	5.07719	4.25086	4.32821	4.21929	4.48479	5.06549	5.24705	5.577	5.36224
NOL6__chr9	4.51896	4.4782	3.62391	4.0183	5.20904	4.86427	4.5088	4.67743	4.031	3.60722	2.76964	2.90281
IGSF3__chr1	4.40575	3.99277	4.79383	4.5208	4.16597	3.46572	4.58186	4.30748	5.41665	5.75081	6.16196	6.15074
RANBP6__chr9	4.95091	4.92718	5.37523	5.92519	4.54784	4.76117	4.91444	5.62496	5.35293	5.50289	6.09157	6.42637
TRIM46__chr1	3.98087	3.96035	4.33173	4.0183	3.92893	3.86427	3.94245	4.38315	5.29597	5.45708	5.93957	5.42637
GAP43__chr3	7.89695	7.85627	8.5843	8.37585	8.45025	8.53962	8.72482	8.86773	9.89138	9.99233	9.75264	9.94994
EIF3B__chr7	7.51214	7.43755	7.08988	7.31598	7.63727	7.42414	7.35054	7.59118	7.08803	7.00433	6.76964	6.94721
SLC16A1__chr1	5.4204	5.33381	4.92647	5.07719	5.09885	5.25421	4.88587	4.87757	3.93478	4.0636	4.09157	4.07274
BRCA1__chr17	7.78681	7.76301	7.54038	7.31598	6.81506	6.87665	7.0875	6.70507	5.47768	5.84629	6.16196	4.99028
RAB3A__chr19	1.87851	2.08588	3.67121	3.43334	2.2915	2.00629	3.48994	3.23931	5.22655	5.09982	5.67654	5.36224
ENO1__chr1	9.61082	9.49244	8.76482	8.96082	10.2209	10.0904	9.69271	9.97838	8.7833	8.44305	8.48389	8.15074
SERBP1__chr1	8.1242	7.93137	7.91792	7.76426	7.95446	7.82327	7.81755	7.88596	7.3389	7.27107	7.1272	7.34576
ASF1B__chr19	7.01504	7.01267	6.59046	6.98793	6.72149	6.30091	6.02337	6.02658	4.90969	5.12347	4.76964	4.07274
EVL__chr14	7.211	7.11563	7.54674	7.3037	6.93535	6.76784	7.25324	7.0566	8.36567	8.33831	8.1272	8.32908
PCSK1N__chrX	7.50013	7.52051	8.29256	7.88455	7.70654	7.54156	8.31347	8.22102	9.99193	9.76639	9.62139	9.89717
LBH__chr2	5.79104	5.86724	6.01164	5.43334	6.35039	6.41568	6.2307	6.3512	7.16956	7.24435	7.01757	7.24266
SLC29A1__chr6	5.89957	5.91877	5.45173	4.82566	5.40698	5.44923	5.0749	4.92897	4.34359	4.75081	4.09157	3.48778
PPIF__chr10	6.67979	6.34641	6.08334	6.49943	6.2196	6.19611	5.94937	6.01643	5.71343	5.14674	5.09157	5.07274
TMEM185B__chr2	4.85713	5.17334	5.15165	4.82566	4.97955	5.00629	5.0749	5.12432	3.80472	3.8814	4.35461	3.90281
NUP43__chr6	6.13977	5.91877	6.04793	5.92519	5.87646	5.49814	5.78891	5.78097	5.65423	5.13515	5.47008	5.36224
WDR34__chr9	5.13977	4.99277	4.75044	4.82566	4.25086	4.52985	4.52741	4.42467	3.53623	3.76592	3.76964	3.71017
TLN1__chr9	7.01263	6.95213	6.6566	6.71874	7.26112	7.34614	6.98348	7.14154	6.31042	5.81032	5.35461	5.94721
NEK2__chr1	6.85982	6.82735	6.61486	6.5208	6.2196	5.78765	6.05579	6.46004	4.81827	4.78087	5.09157	5.07274
TRO__chrX	5.3609	5.32109	5.89693	5.38754	5.40698	5.09375	5.67664	5.44499	6.06549	6.2947	6.577	6.26036
NAA20__chr20	5.93059	6.00871	6.35364	6.18823	6.35039	6.24469	6.8604	6.48969	5.67671	5.70452	6.09157	6.0321
CCNA2__chr4	7.00536	6.82735	6.62691	6.68127	6.25086	6.41568	6.14288	6.20398	4.94717	4.8952	5.22908	4.22474
CCT5__chr5	7.90478	7.61205	7.43126	7.49943	8.18766	8.18371	8.05899	8.1392	7.34593	7.25777	6.93957	7.36224
PCMTD2__chr20	5.53924	5.33381	5.52437	5.64279	4.90293	4.59125	4.85672	4.85497	5.51974	5.53851	5.47008	5.42637
UG0898H09__chr8	3.49148	3.30827	4.9838	4.68127	2.2915	1.81364	3.24201	3.04	4.53623	4.59035	6.35461	4.90281
PGK1__chrX	7.76259	7.65826	7.49838	7.42202	8.29899	8.46572	8.09376	8.12037	7.79448	7.5797	7.22908	7.44197
PAXBP1__chr21	6.69492	6.74409	6.89194	7.04805	5.96706	5.9011	6.36095	6.01982	6.57266	6.60302	6.89893	6.71017
VASH1__chr14	4.76832	4.71037	5.07457	5.29132	5.02846	4.46572	4.84192	4.80868	6.21123	5.86746	6.35461	6.0321
ZNF532__chr18	6.73649	6.47246	6.73939	6.66216	6.3695	6.17621	6.62572	6.57744	7.11297	6.87793	7.09157	7.22474
C22orf28__chr22	6.39837	6.52328	6.22877	6.49943	6.35998	6.4575	6.3453	6.25378	5.84498	5.86746	5.577	5.85701
NDN__chr15	8.31264	8.45802	8.4304	8.42769	8.13838	8.04246	8.07648	7.86631	8.67764	8.76592	8.65229	8.61706
SRI__chr7	6.75394	6.68579	6.57189	6.62316	6.83582	7.01751	6.76557	6.89614	6.15895	6.12933	5.577	5.94721
GATS__chr7	4.58546	4.17334	4.95542	5.13378	3.92893	3.32821	4.37129	4.38315	5.25671	5.22535	5.76964	5.48778
HIGD1A__chr3	7.37036	7.52328	7.1968	7.46676	8.19571	8.30778	7.92676	7.9172	7.31042	7.30249	7.22908	7.0321
PLK2__chr5	4.4349	4.38356	4.97441	5.24069	5.46142	5.54545	5.54579	5.91082	6.20608	6.08183	6.35461	6.29513
ID4__chr6	9.02646	8.81153	8.90127	8.88455	7.42078	7.20596	7.68495	7.76186	8.54848	8.55165	8.36956	8.37042
CACFD1__chr9	4.84633	4.97665	4.9838	5.07719	5.00422	4.621	5.04937	4.88503	5.77724	6.05132	6.4135	6.18821
KIAA0930__chr22	4.64902	4.69074	4.76141	4.75527	4.97955	4.81364	4.59956	4.5519	5.916	5.81032	5.47008	5.76079
TUBB6__chr18	7.08566	6.96035	6.87184	6.56262	7.60135	7.63928	7.12771	7.09408	6.53213	6.0636	6.22908	5.6577
FBN2__chr5	4.21731	3.85847	3.64775	3.0183	4.2915	4.56088	3.7966	3.79291	2.77724	2.26842	1.76964	0.902813
GFRA1__chr10	4.4204	4.30827	4.83596	4.75527	5.4435	5.21574	5.59074	6.10848	3.12119	3.82481	3.76964	3.71017
NMNAT2__chr1	3.79104	3.50092	4.63588	4.13378	3.76543	3.59125	4.96993	4.29634	5.78416	5.8952	6.01757	6.22474
ZSCAN18__chr19	5.74524	5.73932	6.08334	5.75527	6.05231	5.81364	6.11853	5.9035	6.48619	6.50289	6.577	6.32908
BCAT1__chr12	7.97344	8.02055	7.22877	7.48862	8.46365	8.46981	7.8326	8.16316	7.34359	6.88832	6.81404	6.85701
UBXN2B__chr8	5.4349	5.43165	5.64775	5.68127	5.27132	5.05068	5.48994	5.35658	5.96554	5.69666	6.01757	5.90281
TMCC1__chr3	4.40575	4.52328	5.10934	5.0183	4.67616	4.49814	4.98348	4.63384	5.49465	5.76592	6.01757	6.11227
CYTH1__chr17	2.79104	2.50092	3.00242	3.43334	2.12157	1.81364	1.94245	2.60704	3.16426	3.39041	3.35461	3.71017
CELSR3__chr3	4.53251	4.67084	5.23272	5.38754	4.33103	4.43255	4.90022	4.60704	5.89058	5.90888	6.01757	6.07274
TERF2IP__chr16	8.08566	8.15017	8.64109	8.66696	8.83753	8.47185	9.32349	8.84974	9.956	9.79797	9.94955	9.90281
DPYSL3__chr5	8.04016	7.96648	8.17337	8.0183	7.76903	7.74775	8.25184	7.98382	8.94099	9.22876	8.98881	9.2157
DAAM1__chr14	5.24225	5.13027	5.72824	5.38754	4.581	4.96048	5.70144	5.26239	6.658	6.78458	6.76964	6.90281
ACP1__chr2	6.74814	6.59367	6.46856	6.66216	6.84267	6.82007	6.59516	6.8165	6.26663	6.17531	5.67654	6.18821
GNG3__chr11	5.99561	6.0323	6.33907	6.26623	6.2196	6.10432	6.70962	6.60253	7.8647	7.94749	7.52453	7.90281
HS6ST2__chrX	5.86786	5.18742	6.17645	6.29132	4.64513	4.52985	5.47083	5.34581	4.14289	4.24705	4.76964	4.90281
HADH__chr4	6.15299	6.26247	5.86168	5.82566	5.91599	5.8007	5.74981	5.74455	5.45184	5.31024	5.22908	4.99028
CNPY3__chr6	5.53924	5.20136	4.83596	4.60326	5.66073	5.63564	5.25324	5.22763	4.90969	4.8814	4.35461	4.22474
TROAP__chr12	6.67369	6.56161	6.1179	5.92519	5.82201	6.09375	5.5088	5.78496	4.72066	4.76592	3.35461	3.71017
VDAC2__chr10	7.26068	7.27899	7.05017	7.26623	7.77978	7.87665	7.58852	7.66449	7.52182	7.4407	7.29321	7.26036
IPO4__chr14	4.51896	4.69074	4.19275	4.89277	4.16597	4.09375	4.32947	4.68599	3.16426	3.39041	2.76964	3.48778
CANX__chr5	8.71808	8.78863	8.51549	8.56262	8.95762	9.07641	9.01268	8.8966	8.21251	8.11612	8.03643	8.29513
METAP1__chr4	4.69793	4.60944	4.25618	4.60326	4.51389	4.17621	4.24201	4.192	3.72066	3.79567	3.35461	3.48778
NPAS3__chr14	5.69191	5.29533	6.15581	5.60326	4.794	4.96048	4.96993	5.20993	3.69151	3.98831	4.09157	3.71017
CENPK__chr5	3.87851	3.6302	3.86676	4.13378	3.51389	3.09375	3.56394	3.192	2.46912	2.08785	1.76964	1.90281
TFG__chr3	6.73356	6.74884	6.44153	6.31598	6.71403	6.70673	6.59516	6.5682	6.26168	6.08183	6.01757	5.90281
PSMB6__chr17	7.97839	7.95213	7.85912	7.73712	8.45025	8.33047	8.32549	8.34716	8.01785	7.8338	7.74692	7.91404
CCNB1__chr5	7.79386	7.5804	7.07016	7.36408	7.3114	6.8007	6.77729	6.84162	6.25173	5.78829	6.16196	5.99028
MT1X__chr16	4.62393	4.56701	4.14328	5.34023	3.12157	3.91318	3.37129	3.53304	2.16426	2.42889	1.76964	1.90281
TMOD2__chr15	3.62393	3.02448	4.34637	4.13378	3.87646	3.25421	4.41194	4.50428	5.63139	5.81032	5.76964	6.32908
IRGQ__chr19	5.17475	5.08588	5.38944	5.43334	5.14394	5.17621	5.43184	5.3404	6.31521	6.18096	6.01757	6.51752
DTYMK__chr2	6.20043	6.34641	6.24058	6.16126	5.83582	5.6645	5.64289	5.74455	5.14289	4.83917	4.35461	4.36224
ID3__chr1	6.26678	6.0323	5.71137	5.89277	2.70654	2.59125	2.76557	2.04	2.60036	2.57328	3.35461	0.902813
CHGA__chr14	4.29884	4.14477	5.25618	4.5208	4.82201	5.23511	6.00356	5.85117	6.98369	7.01385	6.93957	7.32908
CD81__chr11	9.1839	9.18742	8.90931	8.88455	9.55411	9.49814	9.16905	9.08278	8.67113	8.64652	8.32423	8.61706
SPARC__chr5	9.22983	9.12022	8.51062	8.42769	9.77083	9.75364	8.8326	9.06852	8.81236	8.41697	8.1272	7.8686
PAFAH1B3__chr19	7.66141	7.60944	7.69	7.32816	7.53943	7.23511	8.00688	7.66882	8.82499	8.77155	8.92952	8.97963
CDK2__chr12	5.8838	5.7677	5.22481	5.8596	5.05231	4.65014	4.90022	5.04667	3.95944	3.35088	3.76964	3.22474
TPM1__chr15	10.3879	10.5198	9.2615	9.59825	10.7344	10.8324	9.96054	10.3285	9.29112	8.70648	8.3088	7.90281
SCAMP5__chr15	3.62393	3.45511	4.33173	4.13378	4.02846	4.25421	4.91444	4.62496	5.51974	5.25777	5.93957	5.22474
IFITM2__chr11	9.12532	9.25162	8.72054	8.61325	9.6074	9.66806	9.33212	9.16163	8.16294	7.94914	8.2615	7.90281
CRMP1__chr4	8.1186	8.02252	8.60348	8.2147	8.25856	8.22061	8.66828	8.49396	9.45996	9.53079	9.35461	9.70694
SNRPB__chr20	7.57731	7.67334	7.65807	7.39912	7.67232	7.79745	7.80807	7.81161	6.45184	6.60302	6.9791	6.85701
NQO1__chr16	6.89957	6.88029	5.7057	6.2147	7.80807	7.95465	7.72985	7.81259	5.68413	5.24705	5.22908	5.6577
SYNCRIP__chr6	7.91904	7.8716	7.87057	7.99558	7.93214	8.05614	7.98684	7.98208	7.64095	7.6828	7.577	7.68417
RAB8B__chr15	7.80087	7.84299	7.73939	7.8596	7.38367	7.17119	7.16979	7.14775	6.89378	6.70452	7.05505	6.63073
TP53I3__chr2	4.93059	5.14477	4.575	4.9569	5.05231	4.86427	4.90022	5.06647	3.98369	3.57328	3.35461	3.22474
CNIH2__chr11	6.55923	6.57773	6.95303	6.70013	6.27132	6.3986	6.66408	6.46751	7.72066	7.90547	7.60253	7.47267
LPHN1__chr19	4.89957	4.99277	5.33907	5.47773	4.12157	4.43255	4.85672	4.9786	6.64285	6.33071	6.16196	6.71017
MIR600HG__chr9	3.4349	3.58838	3.47191	3.24069	2.4435	2.70673	2.9969	2.92897	4.60036	4.28948	4.35461	4.22474
SEC61A1__chr3	6.89433	6.88462	7.00934	6.89277	7.45249	7.3943	7.33741	7.5682	6.96858	6.78458	6.93957	6.88009
ARG2__chr14	4.18336	4.52328	4.45848	4.24069	4.12157	3.81364	3.56394	3.66015	5.40772	5.37078	5.09157	5.54667
ENC1__chr5	7.30871	7.3805	7.64775	7.64279	7.3695	7.38566	7.99523	7.98902	8.6111	8.47213	8.52453	8.8157
CLASP2__chr3	6.04843	5.72973	6.6448	6.73712	5.64513	5.63564	6.28093	6.02321	7.92386	7.70648	7.577	8.1602
TIMP1__chrX	8.51385	8.72129	8.11469	8.04805	9.17821	9.37479	8.79852	8.82863	7.95024	7.72012	7.47008	6.71017
LPHN2__chr1	8.5501	8.46381	8.60119	8.72796	8.06409	7.85804	8.26577	8.17538	7.52388	7.56466	7.74692	7.32908
ATP9A__chr20	6.76546	6.89752	7.21686	6.64279	6.72149	6.4575	7.03317	6.85117	8.16956	8.40375	8.1272	8.42637
GADD45A__chr1	5.55259	5.64047	5.58738	5.13378	7.42535	7.68577	6.60833	7.17233	6.00754	5.95575	5.67654	5.42637
MSI2__chr17	4.62393	4.74884	4.71702	5.47773	4.51389	4.78765	4.92851	4.93617	3.3622	2.8814	3.35461	3.90281
KIAA0232__chr4	6.70393	6.72008	6.81505	7.04805	6.45249	6.12523	6.60833	6.58889	7.37372	7.38797	7.29321	7.48778
YAP1__chr11	6.16608	6.04007	5.84114	6.0183	5.12157	5.78765	5.1489	5.11166	4.20608	3.85338	2.76964	3.48778
SOX9__chr17	6.31852	6.08588	7.51792	7.3037	4.92893	4.09375	6.34004	6.12432	4.32473	4.44775	5.93957	5.90281
POU3F1__chr1	1.69793	1.82284	3.78311	3.89277	1.70654	2.46572	4.17275	3.72806	5.29597	5.37078	5.85711	6.57524
DANCR__chr4	7.47929	7.4168	7.1785	7.22775	7.51389	7.59874	7.32947	7.53778	6.94717	6.84984	6.85711	6.92518
FAM129B__chr9	5.70991	5.87596	5.31693	5.29132	6.54784	6.46572	6.17275	5.96107	6.12119	6.01385	5.76964	5.8097
ACVR1B__chr12	4.2829	4.45511	4.7723	4.43334	4.54784	4.43255	5.09999	4.61603	5.49465	5.35088	5.577	5.71017
TNFRSF10B__chr8	5.95595	5.7677	5.51792	5.60326	6.2301	6.31007	5.96993	6.0989	5.51974	5.556	5.47008	5.29513
CCT4__chr2	7.41126	7.33064	7.07677	7.16126	7.67999	7.67517	7.55035	7.43105	7.01344	6.98186	6.81404	7.0321
SAMD10__chr20	5.99072	6.04781	6.15581	5.82566	5.95446	5.6062	6.51347	5.85117	7.28137	7.54946	7.47008	7.58931
MRPS30__chr5	3.49148	3.54531	3.44494	3.24069	4.02846	4.43255	4.12465	3.57052	2.93478	2.57328	2.76964	2.48778
CDCA8__chr1	5.70393	5.72008	5.52437	5.56262	5.16597	5.00629	4.7966	5.04667	3.74923	3.46636	4.09157	4.22474
TCF7L2__chr10	6.88116	6.82284	6.04793	6.43334	5.87646	6.12523	5.57293	5.33496	5.69151	5.92243	5.09157	4.99028
CENPE__chr4	4.96097	4.89323	5.1179	5.56262	4.73628	4.96048	4.70144	4.76893	3.85816	3.79567	3.76964	4.07274
ASTN1__chr1	5.71586	5.84964	6.10503	5.79089	5.09885	4.59125	5.46118	4.95045	6.28137	6.43362	6.47008	6.36224
ANXA2__chr15	7.9229	7.89966	6.91177	7.38754	9.01942	9.22182	8.39936	8.96239	7.55051	6.99794	7.05505	6.88009
COTL1__chr16	7.69944	7.58838	7.35001	7.04805	8.56866	8.66806	8.25882	8.34243	8.01932	7.77528	7.32423	7.6577
FLNA__chrX	7.89957	7.7128	7.36087	6.9569	7.90948	7.59125	7.57963	7.44372	7.00458	6.48474	6.577	5.90281
CRTAP__chr3	7.62077	7.15555	7.43126	7.27883	7.90621	7.56853	7.75179	7.66341	7.04258	6.97862	6.76964	6.90281
DARS2__chr1	4.23399	4.17334	3.575	3.24069	4.3695	3.86427	3.7966	3.43486	2.88416	2.98831	2.76964	1.90281
ZDHHC17__chr12	4.80227	4.96035	5.28687	4.89277	4.90293	4.83918	4.92851	4.86254	5.53623	5.53851	6.01757	5.54667
MIR100HG__chr11	7.37976	7.27241	7.62691	7.29132	6.46142	6.38999	6.80807	6.80475	7.83669	7.64039	7.76964	8.23373
SERP1__chr3	7.40207	7.53158	7.46689	7.44457	7.83238	7.74775	7.61488	7.7659	6.95944	6.72399	7.05505	6.78546
EFNA3__chr1	2.11297	1.96035	2.62391	1.43334	1.92893	2.00629	2.48994	2.4144	3.66176	4.33071	5.09157	4.60325
MT-CO2__chrM	14.0289	14.2604	14.1624	14.2285	13.6426	13.8428	13.6085	13.8028	13.7574	13.8381	13.8996	13.9349
SEMA6C__chr1	3.96097	3.54531	4.71702	4.68127	3.51389	2.70673	4.19621	4.07953	5.32473	5.09982	5.76964	5.36224
HN1L__chr16	7.18551	7.38966	6.91669	6.89277	7.25086	7.33272	7.09063	7.24222	6.68043	6.8814	6.4135	6.42637
MAGT1__chrX	5.0005	5.20136	4.63588	4.43334	4.82201	5.36384	4.87137	4.80081	3.80472	3.90888	2.76964	3.22474
LDHB__chr12	8.82996	8.69813	8.52839	8.34023	8.82028	8.74775	8.77339	8.58604	8.29839	8.22535	7.9791	8.04236
ENO2__chr12	6.48104	6.85847	7.08988	6.70013	6.581	6.56088	7.03967	6.98034	8.16559	8.28687	8.03643	8.69723
RPL8__chr8	9.04961	9.06411	8.80116	8.62316	9.1755	9.26838	9.20129	9.19088	8.57963	8.54837	8.49756	8.28652
AURKA__chr20	6.56253	6.43165	5.68856	5.82566	5.99194	5.86427	5.3081	5.29074	4.69151	4.28948	4.35461	4.60325
RAN__chr12	8.54593	8.64812	8.25035	8.26623	8.61142	8.58372	8.44291	8.46813	7.58658	7.63011	7.81404	7.54667
GNG2__chr14	6.08106	6.09337	6.86168	6.92519	6.04044	6.14584	6.8382	6.45754	7.98068	7.94583	7.87817	8.1696
GSTP1__chr11	7.3609	7.3147	6.92891	6.82566	7.64513	7.85804	7.55942	7.33496	6.73858	6.4893	6.52453	6.51752
GNAI3__chr1	7.44209	7.39876	7.42954	7.36408	7.66847	7.72053	7.6514	7.49213	7.32947	7.21163	7.2615	7.01134
HES1__chr3	6.63653	6.34641	6.04793	6.26623	5.90293	5.41568	4.56394	4.76893	4.55253	4.75081	4.35461	4.22474
GNRH1__chr8	4.18336	3.85847	3.54991	4.5208	4.67616	4.96048	4.19621	4.3404	7.53828	7.65263	6.62763	6.22474
IDS__chrX	6.01986	5.78632	6.30198	6.10576	6.66073	6.51408	6.65986	6.60929	7.13479	6.8814	6.85711	7.09264
ZC3H11A__chr1	7.55923	7.6042	7.71983	7.59321	7.01032	6.97783	7.09063	7.22028	7.89378	7.71039	7.65229	7.94721
DKC1__chrX	8.00293	8.05742	7.73939	7.64279	7.68763	7.741	7.55035	7.89152	7.01049	7.07578	6.89893	6.9689
SKA1__chr18	6.21731	6.33381	5.79383	5.8596	5.97955	6.03971	5.75771	5.67313	4.34359	4.70452	3.35461	4.48778
PPP1R35__chr7	6.39467	6.33381	6.20887	6.0183	6.19839	6.30091	6.17275	6.04667	5.71343	5.87445	5.85711	5.48778
ACTN1__chr14	8.34946	8.51354	7.85785	7.81704	9.54259	9.59313	8.73386	9.20807	8.37601	7.83201	7.22908	7.0321
HSPD1__chr2	8.26678	8.21859	7.89568	8.04067	8.34557	8.59687	8.47922	8.32746	7.34593	7.2973	6.76964	7.39467
KIF5C__chr2	5.96597	5.79554	6.91914	6.62316	6.27132	6.38999	6.82321	6.75272	7.88737	7.96723	7.91939	8.11227
ACTN4__chr19	7.80646	7.9018	7.61032	7.58309	7.94175	8.18868	7.72179	7.86254	7.39647	7.40978	6.72384	6.99028
NNAT__chr20	11.66	11.7377	11.2226	11.2155	11.335	11.1076	11.3822	11.1176	12.7702	13.1963	12.6675	12.2686
PCSK2__chr20	4.61122	4.96035	5.66538	5.64279	4.07577	4.13557	5.16087	4.89244	6.25671	6.25777	6.47008	6.36224
TMEM70__chr8	8.53419	8.33697	8.15685	8.14758	8.28899	8.37697	8.18453	8.15085	7.60818	7.67081	7.67654	7.61706
COL11A1__chr1	7.60161	7.59631	6.4105	6.8596	7.82548	7.67871	6.78891	7.03666	7.34359	7.07578	6.16196	6.32908
MCM6__chr2	5.96097	5.72008	5.62391	5.9569	4.70654	4.49814	5.13683	4.89244	4.031	3.98831	4.577	3.90281
PWWP2A__chr5	3.92033	3.92718	4.45848	4.43334	3.3695	3.09375	3.73386	3.28511	4.16426	4.26842	4.577	4.71017
CALM2__chr2	10.7429	10.7429	10.6416	10.7106	10.8918	10.9521	10.8814	10.9202	10.8157	10.9087	10.8113	10.9168
ACOT7__chr1	7.72326	7.84299	7.534	7.39912	8.3695	8.28706	8.14589	8.3047	8.50725	8.40255	8.48389	8.51752
OSTC__chr4	7.3628	7.23563	7.00704	6.92519	7.27639	7.59874	7.08436	7.15239	6.52388	6.65669	6.52453	6.22474
ATRX__chrX	7.18979	7.26247	7.55937	7.47773	6.699	6.74775	7.12159	6.87383	7.81489	7.87793	7.76964	8.22474
SSBP2__chr5	6.87053	6.67584	6.84372	7.03325	6.85628	6.44923	6.63433	6.66015	7.72965	7.65669	7.29321	7.76079
RTN1__chr14	6.80506	6.93137	8.07896	7.9569	6.96706	6.6062	8.07015	7.83008	9.19574	9.45417	9.42786	9.72936
WBSCR17__chr7	4.58546	4.91031	4.88694	5.18823	5.86304	5.85178	6.37644	6.60704	5.69151	5.47558	5.67654	5.76079
GNAZ__chr22	4.34563	4.6302	4.75044	4.82566	4.12157	4.13557	4.52741	4.68599	5.46912	5.12347	5.35461	5.6577
FOXP1__chr3	5.76259	5.87596	7.52115	6.98793	5.40698	5.56088	6.87501	6.57973	6.01932	6.41936	7.9791	7.68417
BCLAF1__chr6	7.49668	7.35578	7.16617	7.34023	7.30148	7.12523	6.95626	7.09247	7.60232	7.38797	7.4135	7.50273
DPPA4__chr3	6.92803	6.93971	7.4261	7.42202	6.3695	6.20596	7.0749	6.69238	5.29597	4.70452	4.577	5.36224
CKS1B__chr1	9.1999	9.23901	8.70925	8.66216	9.38719	9.30778	8.72179	8.79736	7.58855	7.52525	7.81404	7.51752
ITGB3BP__chr1	5.0005	4.71037	4.7057	4.34023	4.4435	4.52985	4.45146	4.4144	3.031	3.64039	3.35461	3.22474
FAM222B__chr17	5.61759	5.4667	5.77771	5.9569	5.581	5.32821	5.75771	5.6558	6.61983	6.52081	6.72384	6.36224
PDE1A__chr2	0.112971	0.0858784	1.03895	0.433339	-0.878427	0.591249	1.24201	0.744546	2.39873	2.82481	3.35461	2.48778
UBE2D3__chr4	7.52744	7.41081	7.42438	7.25352	7.94494	7.72739	7.69528	7.6558	7.66176	7.34083	7.49756	7.29513
GNPTAB__chr12	3.94079	4.22884	4.61184	4.13378	4.61343	4.52985	4.73386	4.76893	5.52801	5.52081	6.22908	5.29513
ZNF540__chr19	2.3146	1.67084	2.67121	1.43334	1.70654	1.81364	2.70144	2.77697	4.51974	4.68875	4.93957	4.60325
COMMD10__chr5	4.97095	4.94386	4.85657	4.75527	4.95446	5.21574	4.74981	4.8397	4.34359	4.31024	3.76964	3.71017
CALD1__chr7	7.21521	7.42573	6.82031	6.89277	8.13	8.3372	7.46842	7.71138	7.06264	6.57328	6.22908	5.90281
ARL6IP1__chr16	8.33504	8.20136	7.94463	8.2147	8.24051	8.13299	8.05899	8.13764	7.81489	7.52747	7.19591	7.69723
TSEN15__chr1	5.39837	5.40781	5.0208	5.47773	5.90293	5.96048	5.84934	5.77697	4.77724	4.86746	4.09157	4.22474
PSMA5__chr1	6.67369	6.60944	6.35001	6.75527	7.11593	7.09904	6.86406	6.82621	6.17483	6.24705	6.09157	6.26036
CDCA3__chr12	5.32242	5.30827	5.1179	5.24069	5.00422	4.29169	4.56394	4.22763	3.56865	3.57328	2.76964	3.48778
CHD9__chr16	6.13089	5.93554	6.37523	6.18823	5.86304	5.65014	6.04291	5.8397	6.66176	6.91567	6.89893	6.60325
PJA1__chrX	7.08336	6.94386	7.2484	6.89277	6.67616	6.65734	6.88587	6.64706	7.50307	7.58184	7.4135	7.3122
PKIA__chr8	6.09938	6.07077	6.52115	6.70013	5.75093	5.77447	6.19038	6.16163	7.20351	7.37572	7.29321	7.15074
OIP5-AS1__chr15	4.18336	4.0555	3.76141	4.24069	4.40698	4.13557	3.85672	4.3404	2.83169	3.13515	2.76964	2.48778
SOX11__chr2	9.01625	9.02644	9.30104	9.30986	8.96078	8.81846	9.34464	9.15007	10.1436	10.3012	10.0033	10.1743
SERINC1__chr6	6.07181	5.98473	6.84114	6.34023	6.71403	6.28241	6.65986	6.57052	7.48831	7.18939	7.60253	7.56102
GLRX__chr5	3.98087	3.78632	4.17645	4.34023	4.25086	4.78765	5.03643	4.80081	5.27647	5.42889	5.35461	5.76079
C11orf31__chr11	7.39096	7.34012	7.05241	7.31598	7.41159	7.55318	7.33212	7.23348	6.92855	6.90888	6.62763	6.57524
DUT__chr15	6.07181	6.1804	6.0208	6.07719	5.07577	5.49814	5.57293	5.43993	4.97162	4.98831	4.577	4.90281
WASF1__chr6	8.29387	8.20828	7.77501	8.00319	7.48352	7.3943	7.26992	7.02827	7.93478	7.91736	7.83573	7.60325
NUP62__chr19	6.66756	6.86286	6.65953	6.49943	6.41619	6.57614	6.38667	6.36992	6.14289	6.40978	6.29321	6.22474
SPG21__chr15	5.82996	5.86724	5.71137	5.60326	5.86304	5.85178	5.71774	5.76893	6.27647	6.42889	6.35461	6.0321
FAM126B__chr2	3.07644	2.74884	3.44494	3.24069	3.51389	3.17621	3.73386	3.51393	4.18533	4.13515	5.35461	5.07274
DIAPH2__chrX	3.76832	3.3589	3.20887	3.24069	3.82201	3.25421	4.09999	4.3512	1.39873	1.64039	1.76964	1.90281
PPP1R15A__chr19	4.84633	4.87596	5.0208	5.0183	5.99194	6.32821	5.60833	5.81259	6.41219	6.48474	5.93957	6.32908
VCAN__chr5	6.62077	6.58306	6.98614	6.77319	6.4703	6.54545	6.57293	6.57973	7.98219	8.47443	7.67654	8.1696
SEC11A__chr15	8.5765	8.55484	8.22184	8.12683	8.81157	8.82327	8.52741	8.57513	8.12392	8.1028	8.05505	7.63073
C14orf23__chr14	8.58627	8.40027	7.91792	7.73712	7.7582	7.65014	7.5088	7.26525	7.31521	7.50063	6.9791	6.42637
MAPT__chr17	4.39096	3.92718	6.09206	5.5208	4.76543	4.43255	5.87137	5.54721	7.96097	8.04514	8.09157	7.85701
CTNND2__chr5	5.80227	5.89323	6.77501	6.8596	5.3695	5.31007	6.31347	5.9035	7.11572	7.31795	7.49756	7.41061
ATP6V1F__chr7	8.21311	8.22543	8.07567	8.0183	8.26623	8.10168	8.37129	8.35322	8.916	8.77342	9.03643	8.79763
PLK4__chr4	4.49148	4.56701	4.6943	4.75527	3.76543	3.3986	4.09999	3.79291	2.39873	2.42889	1.76964	2.90281
SHANK2__chr11	2.18336	1.96035	3.52437	3.89277	1.92893	2.00629	3.24201	3.64267	4.09917	4.60722	4.577	5.8097
C20orf112__chr20	6.23813	6.0323	6.07016	5.71874	6.19839	5.92515	6.24764	5.85117	7.28381	7.31024	6.81404	7.07274
PAK7__chr20	0.960968	1.50092	3.36087	3.0183	1.70654	0.591249	3.45146	2.64267	3.66176	3.96232	5.67654	4.8097
BEX4__chrX	7.83953	7.78169	7.74906	7.64279	7.94812	7.87973	8.0135	7.96107	8.45726	8.55382	8.3088	8.22474
ASCC3__chr6	5.23399	5.2691	5.22481	5.43334	6.155	5.81364	5.78117	5.70718	4.92229	4.82481	4.93957	4.99028
FAM64A__chr17	5.06717	4.72973	4.85657	4.34023	4.73628	5.02865	4.70144	4.72806	3.66176	3.60722	2.76964	2.90281
RER1__chr1	4.64902	4.7677	4.575	4.24069	5.38836	5.41568	5.40188	5.51393	4.26663	4.22535	4.577	4.22474
MT1F__chr16	7.47579	7.27899	6.36448	7.13378	4.25086	4.67871	4.58186	4.57973	4.38058	4.50289	5.09157	4.22474
AKAP6__chr14	2.54593	2.40781	3.17645	3.43334	2.12157	2.17621	3.09999	2.92897	4.83169	4.48474	4.93957	4.36224
SLC38A1__chr12	6.06717	5.9018	5.94584	5.75527	5.90293	6.07238	5.90735	5.91811	6.66176	6.65669	6.35461	6.51752
DNAJA1__chr9	6.35329	6.32109	5.97441	6.31598	6.64513	6.53767	6.34004	6.54721	5.96554	5.86044	5.67654	6.18821
CCDC101__chr16	4.76832	4.85847	4.47191	4.24069	4.51389	4.21574	4.32947	3.82427	5.19574	5.03894	5.09157	4.71017
TSPAN18__chr11	7.27284	7.28555	6.14328	5.89277	6.40698	6.40717	5.40188	5.5425	6.39421	6.03271	4.93957	4.8097
KIF18A__chr11	4.47754	4.4782	4.56251	4.24069	4.02846	4.05068	4.1489	4.1306	2.60036	2.50289	1.76964	2.90281
DYNLT1__chr6	7.45638	7.56431	7.70001	7.58309	7.82201	7.93702	8.07173	7.9172	7.91758	8.08032	8.21259	8.36224
ANKRD9__chr14	6.40943	6.30182	5.74492	5.89277	5.84949	5.51408	5.71774	5.51873	4.84498	4.20333	3.76964	4.60325
COA1__chr7	6.82996	6.70549	6.5966	7.03325	6.56452	6.91918	6.5774	6.6205	5.97162	5.94914	5.577	5.76079
PSMD12__chr17	5.04843	4.85847	4.75044	4.82566	5.42535	5.97207	5.36095	5.47494	4.60036	4.46636	4.35461	4.36224
SLC4A8__chr12	6.11747	6.3147	6.3965	6.31598	5.4435	5.82647	6.04937	5.96811	7.5925	7.53851	7.22908	7.11227
RBM8A__chr1	6.45282	6.38356	6.40001	6.18823	6.62142	6.69977	6.58631	6.54721	5.81827	5.83201	5.85711	6.0321
INA__chr10	8.00171	7.8138	8.85721	8.76426	8.70277	8.53962	9.23778	8.85402	10.4335	10.2618	10.1095	10.484
SYT4__chr18	1.5984	1.50092	2.76141	2.43334	1.70654	0.00628651	3.09999	2.57052	4.34359	4.46636	5.35461	5.76079
SLC4A2__chr7	5.51896	5.53434	4.76141	5.07719	5.4435	5.72053	4.81187	4.95754	4.85816	4.31024	3.76964	3.90281
RCN1__chr11	6.77688	6.85406	6.76141	6.75527	6.86304	6.91918	6.71774	6.73013	5.7633	5.63217	6.16196	5.85701
C19orf66__chr19	1.37601	0.0858784	1.41746	0.433339	1.12157	1.59125	1.70144	0.985554	3.16426	3.50289	3.76964	2.90281
ADAMTS7__chr15	5.0005	4.71037	5.13487	4.5208	4.07577	4.05068	4.26438	4.23931	5.41665	5.6239	5.47008	5.15074
CCNI__chr4	5.55259	5.85847	6.68568	6.24069	4.97955	4.83918	5.4994	5.1431	6.3008	6.78829	6.85711	6.42637
EPB49__chr8	3.79104	4.17334	4.10934	3.75527	4.12157	3.3986	3.9969	3.85497	6.27647	6.27372	5.47008	5.71017
GFOD2__chr16	3.46347	3.2558	3.575	3.43334	4.02846	3.25421	3.7966	3.76085	4.69151	4.78087	4.76964	4.48778
SNX32__chr11	1.79104	1.30827	2.30198	0.433339	1.12157	1.59125	2.1489	1.53304	3.66176	3.39041	4.35461	3.22474
SDC2__chr8	8.38537	8.27899	7.51792	7.68127	8.61142	8.79419	8.14589	8.47185	7.27647	6.91567	6.85711	6.15074
PRDX1__chr1	8.00415	7.948	7.64183	7.58309	8.38836	8.36604	8.3081	8.46875	7.47341	7.03583	7.29321	7.34576
TTC38__chr22	4.29884	4.08588	4.14328	4.13378	3.82201	3.86427	4.12465	4.10529	3.28625	2.76592	3.35461	2.90281
HSPB1__chr7	9.25712	9.21344	8.76004	8.67174	9.70183	9.90413	9.46057	9.35188	8.86062	8.54619	7.85711	7.54667
RDX__chr11	6.65523	6.60944	6.65071	6.64279	6.4879	6.78107	6.59516	6.57283	6.14289	6.21988	6.22908	6.22474
XRCC1__chr19	5.03897	5.22884	4.95542	5.24069	3.97955	4.3986	4.24201	4.118	4.61596	4.48474	4.35461	4.60325
SLC25A3__chr12	9.3835	9.36819	9.14799	9.63546	9.48352	9.37261	9.23566	9.67313	8.70798	8.63011	8.66446	8.55386
CD200__chr3	6.2829	6.16625	6.6209	6.9725	5.96706	5.32821	6.59956	6.45504	7.78761	7.69073	7.60253	8.39467
PAICS__chr4	8.2829	8.26579	7.84501	8.0183	8.18227	8.32144	7.93201	7.96811	6.98369	6.86395	7.19591	6.4574
CRISPLD1__chr8	5.81341	5.82284	5.99779	5.64279	5.62937	5.49814	5.65986	5.66015	4.0768	4.33071	3.35461	4.22474
DERL2__chr17	4.61122	4.8047	4.05687	4.43334	4.76543	4.83918	4.87137	4.50428	3.53623	3.73555	3.35461	2.90281
HMGN2__chr1	7.06251	7.24911	7.21885	6.9569	6.99194	6.71365	7.22215	7.35792	5.94099	5.96886	5.85711	5.85701
RPL3__chr22	10.0874	10.0191	9.91761	9.80838	10.2977	10.2327	10.1831	10.183	10.0683	10.0378	9.84646	9.88295
HNRNPL__chr19	7.27284	6.96035	7.07896	6.60326	7.00422	6.82647	6.82321	6.78097	6.52388	6.33071	6.16196	6.07274
BCL11B__chr14	4.54593	4.82284	6.75044	6.43334	5.16597	4.36384	6.72583	6.23931	7.16956	7.78087	8.47008	8.4574
POU2F2__chr19	4.23399	4.14477	4.4852	3.24069	4.4435	4.70673	4.84192	3.85497	6.96554	7.23895	5.93957	6.32908
HNRNPD__chr4	10.3258	10.2596	10.0702	9.83848	10.0837	9.97207	9.9614	9.97991	9.48247	9.59564	9.477	9.30369
CYFIP1__chr15	7.31852	7.1804	6.95781	7.26623	6.95446	7.07238	6.88226	6.81063	6.21123	6.13515	6.35461	5.90281
SLC25A5__chrX	7.97468	7.74884	7.58584	7.72796	8.08736	8.05341	7.99523	7.84736	7.54441	7.59035	7.32423	7.32908
SH3GL3__chr15	5.04843	4.50092	4.58738	4.9569	4.61343	4.09375	4.63433	4.5519	6.09361	6.02645	5.577	6.63073
CDC25B__chr20	5.62393	5.67084	5.85144	5.8596	4.97955	5.13557	5.66828	5.8813	4.46912	4.28948	4.93957	4.99028
SOX2__chr3	11.3486	11.2525	11.0264	10.986	11.0035	10.6989	10.9155	10.8806	10.3155	10.3218	9.9092	9.71338
ZC3HAV1__chr7	6.08566	5.72008	5.61788	5.43334	5.69143	5.6062	5.31883	5.21585	4.7633	4.52081	4.93957	4.36224
HEATR2__chr7	4.44925	4.30827	3.94584	4.34023	3.51389	4.00629	3.94245	4.01303	2.72066	3.03894	2.76964	2.48778
SCN8A__chr12	2.69793	2.40781	3.14328	3.43334	2.2915	2.00629	2.56394	2.64267	3.63139	3.57328	4.35461	3.71017
PLK1__chr16	7.03897	6.88462	6.49838	5.9569	6.77262	6.41568	6.46118	6.43232	5.22655	5.41936	5.35461	4.60325
PON2__chr7	7.38723	7.29533	7.69143	7.57289	7.20904	7.01751	7.18745	7.03498	6.34359	6.44775	6.01757	5.99028
SEC61B__chr9	8.58302	8.23563	8.04681	8.0258	8.81157	8.74775	8.54921	8.59516	8.25297	7.89176	8.01757	7.88009
PDK1__chr2	2.79104	2.89323	2.62391	3.0183	2.4435	2.81364	2.94245	2.98555	3.28625	3.82481	3.76964	3.90281
IVNS1ABP__chr1	5.71586	5.6302	5.81505	5.9569	5.05231	4.83918	5.47083	5.33496	5.72066	5.57328	5.85711	5.8097
HMGN3__chr6	7.21311	7.08963	6.80713	6.9569	7.09312	6.87665	6.94937	6.78496	6.15362	5.8814	5.22908	5.99028
EPHB4__chr7	4.67369	4.7677	4.28687	4.82566	4.61343	4.621	4.17275	3.87008	3.60036	3.46636	2.76964	2.90281
GDI1__chrX	7.2215	7.1944	7.67991	7.57289	7.85967	7.74438	8.17127	8.1624	8.89857	8.80393	8.58982	8.66436
PPP2R5A__chr1	3.34563	2.96035	2.8463	2.0183	3.4435	2.59125	3.32947	2.87008	1.98369	1.18096	1.76964	0.902813
DCTPP1__chr16	6.09025	5.87596	5.40352	5.47773	5.92893	5.85178	5.69322	5.47494	5.01932	4.90888	4.93957	4.8097
GUK1__chr1	5.85713	5.68083	6.08771	5.68127	6.33103	6.43255	6.4994	6.3646	6.57665	6.36087	7.01757	6.48778
CCDC120__chrX	4.01986	3.78632	3.52437	3.89277	4.12157	3.96048	4.09999	3.6945	5.17483	5.05132	4.577	4.90281
CDK5R1__chr17	6.59194	6.95213	8.18768	8.08439	6.96706	6.84549	8.04937	7.64706	8.84581	9.13224	9.23725	9.63413
GSDMB__chr17	2.87851	2.40781	3.14328	3.43334	2.581	1.81364	2.24201	2.60704	3.83169	3.8814	4.577	4.07274
SAYSD1__chr6	4.49148	4.20136	4.45848	4.34023	3.64513	3.3986	4.12465	4.06647	4.87122	5.16964	5.67654	5.85701
CTDSP1__chr2	4.03897	3.6302	3.90684	3.24069	3.2915	3.32821	3.82697	3.58889	2.39873	1.64039	1.76964	1.90281
CTNNA2__chr2	2.87851	3.20136	4.20887	4.0183	3.3695	2.17621	3.76557	3.98555	6.27647	6.24705	5.93957	6.54667
CCDC144B__chr17	1.49148	1.82284	2.17645	2.0183	1.70654	1.59125	3.41194	3.1431	3.3622	4.50289	5.85711	5.22474
MAP1B__chr5	9.76043	9.80184	10.0809	10.168	9.77083	9.73591	9.94288	9.91879	10.7848	10.9057	10.5245	10.9595
HERC1__chr15	4.70991	3.92718	4.90684	3.89277	4.25086	3.86427	4.82697	4.3512	5.52801	5.36087	5.93957	5.60325
C7orf13__chr7	4.16608	4.28228	4.575	4.0183	4.20904	4.93702	4.96993	4.51393	5.14289	5.21438	5.577	5.29513
B2M__chr15	6.14859	5.96035	5.4918	5.56262	6.74362	6.75448	6.32416	6.48969	5.89058	5.63217	4.577	4.99028
SPINT2__chr19	6.59517	6.72008	7.59353	6.98793	7.25086	7.3372	7.62787	7.22763	8.30442	8.28162	9.37697	9.43419
NINJ1__chr9	5.06717	5.30827	5.03895	4.89277	4.61343	4.96048	4.71774	4.62496	4.48619	4.39041	4.35461	4.36224
PTP4A1__chr6	7.21731	7.29533	7.3225	7.22775	7.93856	8.15857	7.90557	7.91811	7.40323	7.66276	7.76964	7.7483
LHFPL4__chr3	0.791043	0.500916	2.92647	2.43334	1.70654	1.59125	2.63433	2.4144	3.85816	4.57328	4.93957	4.71017
TCF3__chr19	6.86251	6.79554	6.82031	6.56262	6.581	6.41568	6.74186	6.42211	6.23162	6.18096	6.09157	6.07274
NRXN2__chr11	4.94079	4.92718	6.43469	6.13378	4.33103	4.29169	5.66828	5.50912	6.47768	6.66074	6.93957	7.1696
NCAM1__chr11	6.25047	6.15913	6.89444	6.47773	5.80807	5.32821	6.32947	6.31025	8.12665	8.32562	7.9791	7.85701
VAT1L__chr16	5.51214	5.45511	5.84114	5.92519	4.92893	4.93702	5.28641	5.0533	6.42553	6.33071	6.09157	6.29513
POLD3__chr11	4.94079	5.02448	4.5372	5.0183	3.70654	3.81364	3.9969	3.80868	2.83169	2.76592	2.76964	3.71017
MCF2L__chr13	5.24225	4.65066	4.9838	5.18823	4.12157	4.25421	4.68495	4.16776	6.56062	6.37078	5.85711	6.26036
SHROOM3__chr4	4.82447	4.96035	4.6828	4.34023	5.05231	5.07238	4.48994	4.76085	3.90969	3.57328	2.76964	3.48778
ALDH16A1__chr19	4.98087	5.07077	4.58738	4.89277	4.25086	4.70673	3.85672	4.23931	3.88416	4.08785	3.35461	4.22474
FAM161B__chr14	2.69793	2.96035	3.41746	2.43334	3.4435	2.91318	3.91444	3.45504	4.45184	4.01385	4.76964	4.22474
RAB6A__chr11	2.5984	2.89323	3.38944	3.0183	3.12157	3.17621	3.7966	3.16776	3.88416	3.73555	4.76964	3.71017
ADH5__chr4	8.63418	8.65447	8.40963	8.18153	8.64121	8.65554	8.41068	8.55949	7.89218	7.98992	7.95947	7.69723
KIF21B__chr1	4.79104	4.97665	6.15581	5.43334	5.09885	4.78765	6.02337	5.89244	7.90176	7.71039	7.52453	7.79763
HSPA5__chr9	6.25047	6.00871	5.7723	5.92519	6.94175	6.91918	6.74584	6.69026	5.83835	5.8952	5.85711	6.15074
CLCN4__chrX	4.74524	4.45511	5.36807	4.60326	4.47912	4.32821	5.03643	4.92174	6.45618	6.30508	6.22908	6.9689
SMAD3__chr15	4.73356	4.56701	4.10934	4.13378	4.64513	4.73421	4.0749	4.31854	3.50307	3.35088	1.76964	2.48778
CDK2AP2__chr11	6.65213	6.72492	6.61486	6.56262	7.4703	7.11481	6.99356	7.31991	6.69885	6.34587	6.35461	6.36224
NEFM__chr8	4.03897	4.0555	4.43126	4.13378	3.92893	3.91318	4.0749	3.85497	5.41665	5.39041	4.93957	4.99028
HSPH1__chr13	6.78256	6.91454	6.54357	6.66216	7.10457	7.43674	7.2307	7.05825	6.52801	6.68875	6.09157	6.39467
PRDX6__chr1	8.34659	8.41231	7.88819	8.15444	9.33346	9.56471	8.98348	8.89152	8.12119	7.89349	8.10949	7.54667
PSMD14__chr2	6.26272	6.20828	6.00242	5.92519	6.581	6.35501	6.38667	6.37523	6.14826	5.95575	5.76964	5.90281
STMN2__chr8	6.08106	5.94386	7.26005	7.51015	6.68382	6.68577	7.56619	7.18598	9.65894	9.94873	9.3917	9.55745
SSBP1__chr7	7.53756	7.59631	7.30198	7.51015	7.69522	7.68928	7.73186	7.72806	6.89378	6.96886	7.09157	6.7357
SLC16A14__chr2	4.25047	4.30827	4.37523	4.75527	5.00422	5.07238	5.58186	5.34581	5.04258	5.556	5.47008	5.76079
ZDHHC9__chrX	6.69793	6.77238	6.45173	5.82566	7.1272	7.03971	6.87137	6.66449	7.58261	7.45009	7.29321	7.15074
CKS2__chr9	9.54676	9.58772	9.12482	9.32208	9.37306	9.47185	9.16608	9.09649	8.00754	7.92747	8.45615	7.78546
CDC25A__chr3	6.21311	6.3147	6.29066	6.13378	5.90293	5.63564	6.06219	5.63384	4.69151	4.98831	4.09157	4.48778
LIN28B__chr6	4.51896	4.89323	2.71702	3.0183	3.92893	3.65014	2.32947	2.1431	3.28625	3.39041	1.76964	1.90281
EPB41L1__chr20	6.07181	6.26247	5.95542	5.5208	5.80807	5.48202	6.0168	5.77697	7.49676	7.37572	7.29321	6.7357
PDXP__chr22	6.80227	6.61986	6.91914	6.70013	6.61343	6.50613	7.11238	6.96107	7.23667	7.32051	7.72384	7.48778
LOC401321__chr7	5.9357	6.17334	6.46521	6.66216	5.42535	5.59125	5.84192	5.8813	6.28137	6.31538	6.29321	6.78546
MEIS1__chr2	5.67369	5.86724	7.22481	6.89277	5.53096	5.25421	6.7966	6.70086	6.47768	6.65263	7.74692	8.20659
RPL10A__chr6	10.4378	10.3409	9.95572	10.088	10.3474	10.3954	10.153	10.2976	9.42884	9.54783	9.577	9.51752
APBA2__chr15	5.01986	4.85847	4.99314	4.43334	4.40698	3.96048	4.63433	4.4144	5.63139	5.54728	5.67654	5.60325
CSRP2__chr12	7.1242	7.46092	6.96968	7.11984	7.52671	7.84864	7.13683	7.05825	6.62755	6.38553	6.22908	5.94721
TFPI2__chr7	3.79104	4.40781	2.96495	3.89277	5.49661	5.36384	4.21929	4.40406	3.69151	3.08785	1.76964	2.48778
TCEA2__chr20	5.53924	5.53434	5.21686	5.38754	4.73628	4.96048	4.90022	4.87008	5.69885	5.88832	5.35461	5.71017
HIST1H2BK__chr6	7.57731	7.54531	6.75044	6.5208	7.39304	7.62467	6.98348	7.26668	6.27647	5.81758	5.76964	5.54667
ID2__chr2	5.30674	5.53434	5.45848	5.5208	2.92893	3.70673	3.19621	2.74455	4.32473	4.556	3.35461	4.36224
MCM4__chr8	6.90218	6.83631	6.5843	6.68127	5.88976	5.85178	5.85672	5.8813	5.04258	5.09982	5.67654	4.71017
COCH__chr14	3.3146	3.02448	3.54991	3.43334	2.581	2.59125	3.09999	2.53304	3.32473	3.18096	3.76964	3.22474
REPS2__chrX	0.598398	0.0858784	0.886943	1.43334	1.70654	0.591249	0.826974	0.455039	3.69151	3.53851	3.35461	3.22474
LRIG1__chr3	4.46347	4.56701	4.76141	4.34023	3.4435	3.09375	3.7966	3.43486	2.53623	3.08785	2.76964	1.90281
NKIRAS1__chr3	4.5724	4.6302	4.99314	4.9569	4.90293	4.98357	5.28641	5.118	5.83835	5.54728	5.67654	5.6577
BCL2L12__chr19	5.75683	5.72973	4.80448	4.9569	5.83582	5.76117	4.90022	4.97161	4.3622	4.01385	2.76964	4.07274
PLA2G12A__chr4	3.72178	3.50092	3.78311	4.13378	3.70654	3.76117	3.82697	3.85497	4.26663	4.60722	4.76964	4.99028
IP6K2__chr3	6.51556	6.6042	6.76687	6.64279	6.71403	6.63564	6.74186	6.68386	7.24171	7.50289	7.87817	7.24266
BANF1__chr11	9.18497	9.27981	9.03725	8.8596	8.75457	8.96048	8.75278	8.78844	8.38741	8.39892	8.49756	8.37042
ABHD6__chr3	2.11297	2.20136	2.30198	2.43334	1.12157	1.32821	2.32947	2.09247	2.88416	3.08785	3.35461	3.48778
MCM5__chr22	6.40207	6.64557	6.31321	5.5208	5.82201	5.43255	5.45146	5.53304	4.41665	4.35088	4.76964	4.07274
STMN1__chr1	10.3202	10.2352	10.4646	10.2929	10.0217	9.97063	10.3918	10.2865	11.0393	11.0231	10.8598	11.122
WNK2__chr9	4.68586	4.78632	4.94584	5.38754	4.47912	4.00629	4.9969	4.71974	6.36682	6.2999	6.76964	6.0321
AKR7A2__chr1	7.21731	7.20136	6.94584	6.98793	7.17142	6.74775	6.96311	6.86443	6.62755	6.41936	6.4135	6.42637
ATP8A1__chr4	3.07644	3.20136	3.67121	3.0183	2.92893	2.00629	3.28641	3.09247	4.53623	4.20333	4.76964	4.48778
FOPNL__chr16	6.64279	6.82284	6.62391	6.56262	6.69143	7.05068	7.1757	6.76893	5.97162	6.38553	6.4135	6.11227
MRPL24__chr1	7.80506	7.54258	7.54991	7.37585	7.76182	7.83601	8.0019	7.92717	7.22146	6.83559	6.85711	6.85701
PGM5P2__chr9	2.3146	3.3589	4.25618	5.0183	3.3695	4.96048	5.2307	5.40406	5.38058	7.2061	9.58982	8.01134
HES5__chr1	6.68889	6.60944	5.62991	5.71874	2.70654	2.00629	2.56394	2.09247	1.98369	1.76592	3.76964	2.48778
RPN1__chr3	6.33407	6.3589	6.13487	5.9569	6.65295	6.81364	6.81944	6.51873	6.06549	6.18658	5.76964	5.90281
RPL12__chr9	10.2314	10.2318	9.92342	9.72105	10.5442	10.4996	10.2871	10.3331	9.80727	9.70501	9.75264	9.63752
CCNG1__chr5	8.1186	8.09711	7.67557	7.55228	8.256	8.16868	7.95969	7.81161	7.81151	7.6808	7.38435	7.4574
HPRT1__chrX	7.14419	7.08963	6.45173	6.60326	7.14394	7.21574	6.98684	6.95577	6.33419	6.28948	6.01757	5.54667
THRA__chr17	5.60482	5.15913	5.98848	5.64279	5.3114	4.83918	6.225	6.27947	6.92229	6.78458	7.19591	7.54667
TGIF1__chr18	6.04371	5.98473	6.48189	6.24069	6.27132	6.21574	6.05579	6.58661	4.79105	5.09982	4.35461	4.8097
C22orf32__chr22	6.51556	6.54531	6.76687	6.73712	6.69143	6.40717	7.03317	6.92536	7.34124	7.45009	7.49756	7.39467
MSI1__chr12	8.66526	8.50934	8.54595	8.27254	7.97332	7.96629	8.25324	8.13686	7.80642	7.71039	7.83573	7.57524
DACT3__chr19	3.96097	4.2558	4.99314	4.13378	3.581	3.76117	4.6514	4.37258	5.53623	6.00114	5.76964	5.85701
CROT__chr7	5.21731	5.07077	5.44494	4.60326	4.64513	4.621	4.78117	4.30748	4.12119	3.8814	4.35461	4.07274
TSPAN6__chrX	7.62235	7.55076	7.09206	6.98793	7.00422	7.18121	6.67664	6.61603	6.46482	6.19777	6.35461	6.15074
CTNNA1__chr5	7.96971	8.00275	7.89568	7.76426	7.99502	8.38133	8.32947	8.34175	7.35293	7.41458	7.01757	7.34576
FZD3__chr8	7.72326	7.68827	8.00126	7.72796	6.87646	6.95465	7.35315	7.2738	7.78243	8.05901	7.99846	7.79763
LRR1__chr14	5.50529	5.34641	4.99314	5.38754	4.67616	4.52985	4.54579	4.87757	3.20608	3.64039	1.76964	2.90281
GRIK5__chr19	3.07644	2.82284	4.12641	3.75527	3.20904	3.25421	4.48994	3.67743	4.74923	4.81032	5.09157	5.22474
ARHGAP33__chr19	5.73941	5.59895	6.32435	6.16126	5.83582	5.86427	6.13683	6.15856	6.81827	6.93585	6.81404	7.0321
ISLR2__chr15	3.64902	3.96035	5.30947	5.0183	3.76543	3.17621	5.27543	4.8397	6.38514	6.36087	6.72384	6.78546
MRE11A__chr11	5.02945	4.82284	4.86676	4.82566	4.64513	4.93702	4.21929	4.43486	3.16426	3.76592	3.35461	3.71017
CAPN2__chr1	7.10619	7.24911	6.61184	6.75527	7.68382	7.90715	6.85672	7.04167	6.67299	6.37078	6.09157	5.76079
BASP1__chr5	7.40207	7.08212	8.11896	8.22775	7.65685	7.31917	8.1534	8.05825	8.99864	9.10429	9.09157	9.24266
TP53__chr17	6.25047	6.32109	5.5812	5.71874	6.37896	6.06157	6.25324	6.46004	4.88416	5.08785	4.577	4.90281
TNRC6C__chr17	4.4349	4.50092	4.63588	4.60326	3.97955	3.76117	4.04937	4.02658	5.0768	5.38063	4.93957	4.90281
AJUBA__chr14	5.0005	5.41978	4.52437	5.47773	5.49661	5.59125	5.38156	5.68172	3.93478	3.46636	3.35461	2.90281
RABGAP1L__chr1	4.72178	5.15913	5.30947	5.92519	5.09885	5.02865	5.0749	4.97161	6.72785	6.73171	6.47008	6.92518
RUVBL1__chr3	5.34563	5.65066	5.30947	5.13378	5.49661	5.63564	5.65986	5.76489	4.73501	4.60722	4.76964	4.48778
DEPDC1__chr1	4.83544	4.78632	4.6943	5.38754	4.16597	4.05068	4.3081	4.15548	3.12119	2.57328	1.76964	1.90281
CRHR1-IT1__chr17	5.20043	5.34641	5.30947	5.29132	4.73628	4.73421	5.1489	5.01303	5.81151	5.75081	5.93957	6.42637
CTGF__chr6	6.02466	6.2757	5.31693	5.56262	7.39304	7.621	7.25882	8.07953	5.89698	5.42889	5.67654	5.60325
WBP2__chr17	6.44568	6.4667	6.7858	6.54186	6.62937	6.44923	6.91797	6.80671	7.33419	7.28162	7.22908	7.34576
SNRPE__chr1	7.75683	7.76536	7.47191	7.62316	7.43899	7.77778	7.4539	7.46378	6.78761	7.04514	6.72384	7.15074
FLYWCH1__chr16	5.0005	4.94386	5.03895	4.68127	4.73628	5.31007	5.0102	5.00621	5.97767	5.86746	6.01757	6.15074
HMGB1__chr13	8.99561	9.06982	8.9797	9.3522	8.97332	9.18121	8.78117	8.80229	7.84664	8.20055	8.16196	8.26913
NDUFB11__chrX	7.83544	7.83631	7.99663	7.87628	7.79046	7.82007	7.97163	7.909	8.21635	8.02331	8.24538	8.28652
ISYNA1__chr19	6.74233	6.96852	5.83596	5.79089	5.77978	5.51408	5.11238	5.16163	5.5925	5.69666	4.577	4.90281
MRPL51__chr12	6.51214	6.67584	6.43126	6.75527	7.08736	7.03971	6.86406	6.96107	6.23667	6.05132	6.29321	6.26036
H1FX__chr3	10.0561	10.247	10.2354	10.048	9.60034	9.56471	9.81708	9.5271	9.96592	10.1264	9.96932	9.95266
EXOSC3__chr9	5.15736	5.0555	5.21686	4.75527	5.25086	5.70673	5.19621	5.02658	4.46912	4.46636	4.35461	4.22474
PIK3R3__chr1	5.89433	5.66079	5.93134	6.04805	5.794	5.96048	6.39176	6.25953	6.80812	7.08484	6.81404	7.41061
TIMELESS__chr12	5.8838	5.8047	5.7057	4.82566	4.84949	4.65014	4.41194	4.79291	4.18533	3.8814	3.76964	3.22474
CSRNP2__chr12	5.21731	5.30827	5.86676	6.34023	5.4435	5.44923	5.82697	5.59345	6.81489	6.52081	7.2615	7.0321
CAPN5__chr11	3.81341	3.71037	4.0208	3.60326	4.25086	4.00629	4.84192	4.28511	4.45184	4.44775	5.22908	4.48778
AXL__chr19	5.71586	5.68083	5.12641	5.38754	6.53943	6.80719	5.73386	5.61154	5.13208	4.31024	4.09157	4.22474
SRA1__chr5	5.99072	6.14477	5.71702	5.64279	6.85628	6.8007	6.70962	6.81063	6.21635	5.77342	5.85711	5.48778
SIVA1__chr14	5.64279	5.53434	5.20083	5.68127	5.62937	5.8007	5.4994	5.17386	4.43435	4.48474	3.76964	4.48778
KHDRBS3__chr8	4.14859	3.89323	4.27161	4.13378	4.51389	4.17621	4.26438	4.44499	4.81827	5.00114	4.93957	5.22474
HMP19__chr5	4.3609	4.0555	6.44834	6.13378	4.73628	3.96048	6.11238	5.78496	7.78588	7.63011	7.89893	8.43419
MLLT11__chr1	8.91904	8.69321	9.39253	9.15102	9.35519	9.4315	9.81944	9.39168	10.2316	10.3503	10.1662	10.5376
PHB__chr17	7.97468	7.8047	7.45511	7.3522	8.42763	8.26603	8.22785	8.045	7.44094	7.12347	7.19591	6.29513
ARF4__chr3	7.37224	7.51772	7.35364	7.44457	7.90948	8.05068	7.81944	7.88596	7.50725	7.43599	7.60253	7.47267
STAU2__chr8	4.68586	4.67084	4.97441	4.60326	4.794	4.52985	5.02337	4.93617	5.43435	5.64856	5.577	5.76079
MPST__chr22	6.77973	6.69074	6.34273	6.0183	6.41619	6.34614	6.17275	5.99936	6.13208	6.18096	5.76964	5.42637
LIX1__chr5	6.87053	6.56701	5.99779	6.26623	6.37896	6.00629	4.76557	5.23348	4.16426	4.08785	4.35461	3.48778
MYL12B__chr18	6.86251	6.84077	6.82031	6.75527	7.87646	8.08043	7.63647	7.69663	7.29112	7.1176	7.05505	7.48778
AFAP1__chr4	4.84633	4.8047	5.56877	5.5208	5.49661	4.91318	5.74186	5.72806	6.44749	6.56466	6.577	6.57524
HMGCR__chr5	7.51214	7.65826	7.68424	7.65251	7.81854	7.72053	7.81376	7.63716	8.09222	8.19219	8.17904	8.36224
ZAK__chr2	4.79104	4.71037	4.91669	4.60326	4.02846	4.17621	4.3081	4.76085	2.93478	3.08785	3.35461	2.48778
DNER__chr2	6.67979	6.6042	7.98263	7.98793	6.51389	6.13557	7.72985	7.40924	7.92072	7.98509	8.53783	8.8686
NME4__chr16	8.66909	8.76653	8.18869	7.98793	8.3766	8.44716	8.16236	8.32197	7.69151	7.49611	7.44207	7.24266
DLG2__chr11	4.4349	4.22884	4.41746	5.0183	4.64513	4.32821	4.0749	3.92897	5.95332	5.78087	6.22908	6.4574
CDK1__chr10	6.81341	6.72008	6.82031	7.07719	6.33103	6.42414	6.58186	6.46253	5.05408	5.32051	4.09157	5.15074
TRAM2__chr6	4.20043	3.92718	3.71702	3.24069	4.76543	4.81364	4.3081	4.2738	4.16426	3.8814	3.35461	2.90281
SRSF2__chr17	9.39652	9.29696	9.15944	8.94509	9.00116	8.89959	9.08672	8.87757	8.5586	8.48245	8.47008	8.53217
CPLX1__chr4	1.25047	1.08588	1.17645	2.0183	0.706535	0.591249	2.04937	1.80868	3.24673	3.60722	3.76964	3.48778
H2AFJ__chr12	5.94586	5.78632	5.5812	4.82566	5.82201	6.06157	5.42192	5.43993	4.87122	4.83917	4.577	3.71017
LDHA__chr11	7.13312	7.07834	6.26391	6.36408	7.25086	7.20596	6.63003	6.74249	6.25671	6.2999	6.01757	5.90281
CCL2__chr17	4.13089	3.74884	4.47191	4.60326	5.54784	6.03971	6.40188	7.10848	4.84498	4.01385	5.577	5.54667
MARK1__chr1	5.3835	5.54531	5.38944	5.56262	4.97955	4.76117	5.11238	5.03331	5.87122	5.53851	6.09157	6.07274
PAN2__chr12	4.46347	4.58838	4.09206	4.34023	3.3695	4.17621	3.45146	3.74455	3.0768	3.18096	2.76964	3.48778
IPO5__chr13	7.4204	7.56431	6.80977	6.92519	7.38836	7.31463	7.05579	6.95577	6.72066	6.75461	6.16196	6.48778
AES__chr19	7.62077	7.52051	7.5308	7.38754	7.67999	7.67871	7.64502	7.69026	8.19963	7.99954	8.22908	8.41061
TUBB2A__chr6	6.70991	6.51772	7.48851	7.13378	7.25086	7.10432	7.59516	7.51032	8.21635	8.11465	8.10949	8.51014
FAM96B__chr16	7.65058	7.75121	7.6448	7.75527	8.01639	8.09109	8.28641	8.35255	7.90335	7.86571	7.93957	8.07274
TJP1__chr15	4.93059	4.54531	4.15996	4.0183	4.51389	4.36384	3.96993	3.71138	3.46912	3.35088	1.76964	1.90281
MALAT1__chr11	6.38723	6.38356	6.82815	7.29132	7.67616	7.59125	8.19475	7.93437	8.35989	9.57435	8.85711	9.06772
MPP2__chr17	4.81341	5.14477	5.35364	5.47773	4.33103	4.32821	4.96993	4.97161	6.09361	6.21988	5.85711	6.18821
HELLS__chr10	5.22567	4.92718	5.03895	4.43334	4.76543	4.17621	4.37129	4.3512	2.66176	2.98831	3.35461	3.22474
RAB9B__chrX	3.76832	4.14477	4.76141	4.43334	4.02846	3.86427	4.26438	4.17993	5.85159	5.32051	5.47008	5.8097
DFNA5__chr7	4.61122	4.78632	4.94584	4.82566	3.70654	4.21574	4.5088	4.22763	4.67671	4.76592	4.93957	4.8097
SYT5__chr19	3.0005	3.45511	4.56251	5.07719	3.581	3.52985	4.32947	4.22763	6.21123	5.68875	6.52453	6.22474
TMEM14B__chr6	5.76259	5.77704	5.16823	5.38754	6.12157	6.30091	5.90022	5.88503	5.20608	5.39041	4.76964	5.36224
TM2D3__chr15	4.47754	4.3589	4.28687	4.0183	4.2915	4.46572	4.58186	4.21585	4.94717	5.18096	5.35461	5.22474
SLC35D2__chr9	4.26678	4.33381	3.49838	3.24069	4.47912	4.43255	3.37129	3.28511	3.3622	3.26842	1.76964	2.48778
DBI__chr2	8.77047	8.54531	8.32896	8.47773	8.6074	8.63746	8.17423	8.536	7.86144	7.6506	7.72384	7.99028
DCX__chrX	7.33407	7.3589	8.57965	8.64766	7.19839	6.76784	8.24483	8.06237	9.4513	9.70501	9.71216	9.77318
TNFRSF12A__chr16	4.75683	4.91031	4.34637	4.5208	6.87646	7.06157	5.75771	6.64267	5.99566	5.03894	5.09157	5.42637
MEIS2__chr15	5.44209	5.43165	6.43126	6.24069	5.581	4.78765	6.58186	6.26239	6.85488	6.72399	7.38435	7.82168
YWHAZ__chr8	9.67826	9.82115	9.60348	9.76426	10.2386	10.2707	10.0291	10.1279	10.2999	10.1428	10.0364	10.3886
CYCS__chr7	6.54259	6.57238	6.75868	6.68127	7.34074	7.3237	7.26438	7.30053	6.49887	6.6688	7.01757	6.7357
PRC1__chr15	7.18551	7.22202	7.17645	6.60326	6.77978	6.23511	6.83073	6.36992	5.74214	5.40978	4.76964	5.15074
TMEM151B__chr6	3.0005	3.20136	3.88694	4.24069	2.92893	2.81364	3.52741	3.1431	5.30562	5.57328	4.93957	5.48778
MAP4__chr3	6.64279	6.74884	7.06796	6.62316	7.22486	7.17621	7.38412	7.22028	7.45618	7.37572	7.47008	7.60325
EEF1B2__chr2	9.86217	9.85075	9.40614	9.63791	10.1446	10.2548	9.95196	9.82839	9.03897	9.20124	9.24538	9.11227
MAT2B__chr5	7.11522	6.73932	6.36807	6.9725	6.92247	6.80719	6.00356	6.48479	5.77724	6.0697	5.09157	5.99028
LIMCH1__chr4	6.57568	6.53434	6.10503	6.38754	6.75093	6.78107	6.8382	7.15702	5.05408	4.85338	5.67654	5.07274
TMEM248__chr7	6.20043	6.1944	5.78311	6.04805	5.97955	6.26367	5.88587	5.91447	5.55253	5.80301	5.09157	5.48778
PPT1__chr1	7.08106	7.22884	7.08552	7.09155	7.10457	7.17621	6.97672	7.03331	6.33419	6.30508	5.85711	6.57524
SLITRK5__chr13	4.44925	4.45511	4.36087	5.0183	3.3695	3.46572	3.48994	3.79291	4.09917	3.93585	3.76964	3.90281
CNST__chr1	3.03897	2.96035	3.30198	3.0183	2.70654	2.70673	3.32947	3.06647	3.80472	3.76592	5.09157	4.36224
PTPRZ1__chr7	6.98334	6.79554	7.88819	7.94904	6.26112	5.82647	6.95282	6.53778	5.63139	5.64039	6.01757	5.54667
SLC18B1__chr6	3.92033	4.22884	3.8463	3.43334	4.02846	4.13557	3.66828	3.89982	3.32473	3.26842	2.76964	2.90281
FAM195B__chr17	4.61122	4.45511	4.37523	4.43334	5.09885	4.76117	5.09999	5.24512	5.30562	4.90888	5.35461	5.42637
PVRL2__chr19	5.66756	5.65066	4.91669	5.13378	5.64513	5.69279	5.44168	5.42467	4.66176	4.48474	3.76964	4.60325
MRFAP1L1__chr4	5.85174	5.7677	6.12216	6.18823	5.90293	5.621	6.11238	5.954	6.26168	6.45708	6.62763	6.78546
MDK__chr11	11.2889	11.3326	10.0429	10.007	11.1223	11.0266	10.301	10.3089	9.55658	9.66276	9.3395	8.99557
UHRF1__chr19	6.06717	5.98473	5.75044	5.34023	5.59731	5.29169	5.27543	5.20398	4.22655	4.0636	2.76964	3.90281
ATP13A2__chr1	6.71288	6.75358	6.64775	6.60326	6.66073	6.3986	6.95626	6.68172	7.51559	7.66074	7.79201	7.27785
PRSS23__chr11	6.15736	6.37128	5.45848	5.64279	6.80807	6.94292	6.0168	6.27096	5.99566	5.33071	4.76964	4.60325
PREPL__chr2	6.06251	5.91031	6.25618	5.9569	6.69143	6.25421	6.60833	6.66449	7.05122	7.0636	6.85711	7.26036
GRAMD1A__chr19	4.64902	4.33381	5.00242	4.68127	4.67616	4.88893	5.11238	4.92174	5.73501	5.36087	5.67654	5.94721
GAR1__chr4	5.19192	4.85847	4.82554	4.24069	4.97955	5.38133	4.37129	4.70297	3.98369	3.73555	3.35461	3.22474
HSPA9__chr5	6.41675	6.42573	6.32435	6.31598	6.155	6.40717	6.55942	6.51634	5.71343	5.58184	5.85711	5.76079
WHSC1L1__chr8	5.79104	5.7677	5.75594	5.47773	5.12157	4.93702	5.68495	5.38315	6.29597	6.25777	6.62763	6.4574
LMBR1L__chr12	0.598398	1.82284	1.30198	0.433339	1.70654	2.17621	1.94245	2.04	3.16426	3.08785	3.76964	2.90281
ARHGAP23__chr17	4.83544	5.0555	5.18462	5.24069	5.2915	5.49814	5.32947	5.52829	6.11022	6.19219	6.62763	5.94721
AHCY__chr20	6.67369	6.70549	6.17645	6.18823	6.99194	6.6645	6.55942	6.60479	5.83169	5.57328	5.85711	5.29513
ADD2__chr2	4.3609	4.30827	4.45848	3.75527	4.40698	4.76117	4.9969	4.75272	5.35293	5.36087	5.93957	5.15074
KCNQ3__chr8	1.69793	2.74884	2.8463	2.43334	1.12157	1.32821	1.24201	1.67743	3.0768	2.8814	3.35461	3.22474
CYTH2__chr19	6.91516	6.73932	7.17029	7.0183	6.77262	6.47389	6.90379	6.87008	7.41888	7.20333	7.38435	7.22474
ZNRF1__chr16	5.69191	5.58838	5.71137	5.13378	5.05231	5.21574	5.59074	5.47987	6.61983	6.53851	6.76964	7.05256
RALGPS1__chr9	3.79104	3.74884	4.40352	4.60326	3.02846	3.70673	4.54579	4.0533	5.92229	5.8814	5.67654	6.0321
KDM6B__chr17	4.16608	3.85847	4.49838	4.13378	4.4435	4.49814	4.7966	4.29634	5.87122	5.64039	5.35461	5.99028
KIAA0020__chr9	2.83544	2.82284	2.36087	2.43334	3.3695	3.25421	3.52741	3.60704	2.0768	2.42889	1.76964	1.90281
ATP6V0C__chr16	8.81202	8.59499	8.91608	8.65734	9.15637	9.3032	9.27956	9.40081	9.57016	9.48074	9.38435	9.43029
SLC17A5__chr6	2.5984	2.20136	2.88694	3.0183	2.82201	2.59125	3.1489	3.32951	3.60036	3.22535	3.35461	4.07274
DHFR__chr5	7.47929	7.33381	7.14747	7.25352	6.96078	7.16616	7.00023	6.92355	5.77724	6.03271	6.4135	6.22474
TNRC6B__chr22	4.62393	4.8047	5.23272	5.38754	4.581	4.49814	4.91444	4.62496	5.53623	6.09982	6.29321	5.76079
ATP1A3__chr19	3.79104	3.67084	4.5372	4.89277	4.33103	3.96048	4.84192	4.8397	6.32947	6.52525	6.4135	6.0321
FAM131B__chr7	4.39096	4.67084	4.7057	4.5208	4.16597	4.32821	4.90022	4.48479	5.44312	5.22535	5.47008	5.60325
SELM__chr22	4.16608	4.30827	3.10934	3.0183	4.4435	4.91318	3.52741	3.5519	3.56865	3.31024	1.76964	2.48778
GDAP1L1__chr20	5.61122	5.71037	6.28687	5.8596	5.96706	5.34614	6.70554	6.42722	8.47981	8.70941	7.87817	8.38663
PALM__chr19	5.70991	5.9018	5.63588	5.79089	6.06409	5.6645	6.35054	5.80868	6.94717	6.86746	6.93957	7.1696
CDK4__chr12	7.87851	7.68083	7.23862	7.20152	7.78691	7.53767	7.66408	7.43105	6.95332	6.70059	6.16196	6.60325
MYCN__chr2	7.31852	7.01267	7.00934	7.0183	6.34074	5.8007	6.40692	6.18598	5.72066	6.02645	5.76964	5.42637
ODC1__chr2	7.34179	7.1944	7.16823	7.09155	8.01336	7.95465	7.96993	7.89522	6.85488	7.35339	7.2615	6.8097
PTBP1__chr19	9.19352	9.46742	8.85912	8.58309	8.8341	8.76284	8.50293	8.66124	7.89378	7.70844	7.79201	7.82168
SYT1__chr12	6.66141	6.54531	7.37344	7.46676	6.97955	6.86427	7.60833	7.39625	8.64761	8.79106	8.51111	8.57524
TACC2__chr10	3.85713	4.33381	4.14328	4.13378	3.4435	3.70673	4.09999	3.98555	4.56865	5.07578	4.76964	4.71017
GNAO1__chr16	5.53924	5.17334	6.15996	5.64279	4.87646	4.25421	5.61705	5.46004	6.34359	6.59459	6.9791	6.54667
MATR3__chr5	8.64825	8.66079	8.68568	8.92118	8.48352	8.40075	8.5774	8.5067	8.83336	8.87793	8.91939	9.15548
ATP6V1E1__chr22	5.87851	5.96035	5.91177	5.8596	7.03446	6.6645	6.94245	6.58661	6.57266	6.63629	6.577	6.83355
TMEM59L__chr19	3.14859	3.30827	4.44494	4.34023	3.64513	3.96048	4.48994	4.29634	5.72785	5.71234	5.47008	6.11227
NEGR1__chr1	4.21731	3.96035	4.99314	4.9569	4.581	4.56088	4.78117	5.10529	6.55253	6.44775	6.29321	6.15074
KIF4A__chrX	5.8838	6.07077	6.32064	6.36408	5.38836	5.02865	5.4994	5.58889	3.85816	4.22535	5.22908	4.22474
MYPOP__chr19	2.4349	2.30827	3.20887	3.0183	1.92893	1.59125	2.41194	2.57052	3.031	2.26842	3.76964	3.48778
KPNA2__chr17	3.62393	3.89323	3.71702	3.60326	3.82201	3.65014	3.88587	3.51393	2.24673	2.98831	2.76964	1.90281
POLA1__chrX	5.33794	5.08588	5.29445	5.38754	4.2915	4.43255	4.94245	4.71138	4.28625	4.22535	4.35461	4.07274
JUP__chr17	5.5984	5.2691	5.54991	5.13378	5.88976	5.65014	6.0168	5.78496	6.83835	7.0788	6.4135	6.6577
ZFHX4__chr8	4.64902	4.8047	5.55622	5.60326	4.2915	4.13557	5.35054	4.94333	5.74923	6.01385	6.35461	5.99028
ANKRD46__chr8	3.07644	2.40781	3.38944	3.0183	3.20904	2.32821	3.19621	2.74455	3.85816	3.57328	4.35461	3.48778
TPI1__chr12	7.48975	7.6532	7.06353	7.20152	7.71029	7.632	7.40943	7.51873	6.93478	6.86395	6.85711	6.54667
ERCC1__chr19	5.03897	5.15913	5.17645	4.68127	5.54784	5.72053	5.4994	5.56124	5.04258	5.12347	4.93957	4.71017
EBF1__chr5	4.11297	3.50092	6.37165	6.24069	3.4435	2.91318	5.02337	5.1431	7.04258	7.10577	7.49756	7.8097
RIMS3__chr1	3.03897	2.89323	3.03895	3.0183	3.02846	2.70673	2.63433	2.80868	4.16426	4.0636	3.35461	3.90281
AEN__chr15	5.50529	5.37128	4.76141	4.89277	6.61343	5.97207	5.90735	6.04667	5.38968	4.67281	4.577	5.22474
CALM3__chr19	8.27989	8.20482	8.31879	8.07719	8.4435	8.19364	8.48519	8.30262	8.71885	8.88053	8.76964	8.75456
TRMT112__chr11	9.35472	9.30424	9.14276	9.09867	9.29024	9.19364	9.19621	9.25773	8.57565	8.60092	8.83573	8.61017
MVB12B__chr9	4.40575	4.30827	5.0299	5.13378	4.581	4.09375	4.84192	4.74455	5.5925	5.68875	5.67654	6.54667
MLLT3__chr9	4.72178	4.45511	4.88694	4.68127	4.20904	3.96048	4.59956	4.48479	5.17483	5.37078	5.93957	5.15074
KIAA2026__chr9	5.24225	5.50092	6.05687	5.68127	4.92893	4.78765	5.59956	5.10529	6.26663	6.56898	6.35461	6.71017
VIMP__chr15	4.79104	4.84077	4.59966	4.82566	5.12157	5.44923	5.04937	5.118	4.50307	4.01385	4.09157	4.22474
SH3BGRL__chrX	6.54259	6.35266	6.59353	6.2147	6.155	6.31007	6.08121	5.8165	5.60818	5.33071	5.35461	5.54667
TENM4__chr11	4.05783	3.30827	3.86676	4.0183	2.82201	2.70673	3.24201	2.98555	4.41665	4.0636	4.35461	3.90281
RUFY2__chr10	4.94079	5.28228	5.10934	5.8596	5.00422	5.21574	5.21929	5.16163	6.1375	6.39528	5.93957	6.51752
SRXN1__chr20	2.96097	3.14477	3.36087	3.75527	4.16597	4.25421	4.85672	5.18598	3.12119	2.98831	4.09157	4.60325
FXYD7__chr19	1.49148	1.96035	3.71702	2.43334	2.4435	1.81364	3.48994	3.43486	5.031	4.98831	5.35461	4.99028
ARL4C__chr2	7.15079	7.05934	6.90437	7.24069	6.06409	6.12523	6.52278	6.58889	7.07115	6.92579	7.32423	7.41061
MCM2__chr3	7.12643	6.75358	6.63588	6.04805	5.99194	5.85178	6.24764	6.06319	5.45184	5.22535	5.22908	4.90281
ZNF84__chr12	5.46347	5.52328	5.66538	6.0183	5.4435	5.05068	5.6514	5.46999	6.25173	6.21988	6.22908	6.71017
TERF2__chr16	7.23606	7.18742	7.35364	7.22775	6.97955	6.97783	7.3	7.32129	7.74036	7.96886	7.83573	7.76079
ASAP1__chr8	6.49495	6.17334	6.45173	6.36408	6.2301	6.23511	6.225	5.99936	5.71343	5.81758	5.577	5.60325
PFKP__chr10	5.75104	5.84964	5.15165	4.75527	6.78691	7.05614	6.2078	6.64925	5.8647	5.21438	4.35461	4.48778
PPP1CC__chr12	7.49495	7.50373	7.21087	7.3037	7.05231	6.86427	6.88226	6.97511	7.04547	6.85692	6.47008	6.68417
TNIK__chr3	2.37601	2.40781	2.67121	3.0183	1.70654	1.00629	1.94245	2.192	3.39873	3.26842	3.35461	3.22474
POLE__chr12	5.81341	5.94386	5.62391	5.13378	4.581	4.78765	5.32947	4.42467	3.90969	3.98831	3.35461	3.71017
RCC2__chr1	6.41675	6.40178	6.42092	6.34023	6.11026	5.88893	6.03643	6.13374	6.01932	5.90206	6.09157	6.11227
SLC7A1__chr13	5.94586	6.12297	5.32435	5.13378	6.28144	6.52199	5.84192	6.04999	5.61596	5.71234	4.76964	4.60325
TK1__chr17	6.05783	6.41381	5.44494	5.79089	5.42535	5.23511	5.2307	5.42467	4.45184	4.37078	2.76964	3.48778
HNRNPC__chr14	10.2956	10.0406	10.1759	10.3641	10.2392	10.007	10.3148	10.5563	9.5439	9.46752	9.89377	9.99821
IQGAP3__chr1	6.54927	6.74409	6.18462	6.66216	6.18766	6.19611	5.0875	6.12432	5.12119	5.13515	4.577	4.22474
CD47__chr3	5.47052	5.64047	5.78311	5.89277	6.04044	5.9488	6.23636	6.20695	4.81827	4.8952	4.76964	5.60325
SORBS2__chr4	6.44568	6.51772	5.78311	6.13378	5.794	6.13557	5.44168	5.78894	5.95944	5.94251	5.35461	5.54667
FUCA2__chr6	4.61122	4.30827	4.31693	4.60326	5.20904	4.83918	5.16087	4.9786	4.09917	3.42889	2.76964	3.22474
XPO6__chr16	7.57731	7.4667	7.33357	7.34023	7.92893	8.05068	8.05579	8.07953	7.81995	7.72592	7.67654	7.91404
PITPNA-AS1__chr17	5.29089	5.2691	5.37523	5.75527	4.90293	4.88893	5.04937	5.10529	4.39873	4.72012	4.76964	4.60325
PAIP1__chr5	6.83544	6.71037	6.8463	6.84273	6.62937	6.57614	6.68909	6.64486	7.02809	7.12933	7.2615	7.50273
RIMKLA__chr1	3.51896	3.45511	5.15165	4.75527	3.51389	3.09375	5.12465	4.40406	5.5846	5.31024	6.01757	6.0321
CENPN__chr16	6.40575	6.51772	6.29822	6.10576	5.86304	6.10432	5.87864	5.75272	4.63139	4.6239	5.47008	4.22474
SEC31B__chr10	1.96097	2.08588	3.00242	2.0183	0.706535	1.00629	1.24201	1.28511	3.12119	2.42889	3.35461	2.48778
IFITM3__chr11	7.74087	7.82059	7.59046	7.61325	7.89636	8.09375	7.88406	7.74966	6.51974	6.36583	6.93957	6.92518
ATAT1__chr6	6.72768	6.77704	7.534	7.09155	6.53943	6.38999	7.31883	7.15239	8.14154	8.08333	8.16196	8.04236
C12orf5__chr12	5.61759	5.04007	5.3965	5.38754	6.01639	6.1862	6.21355	5.91447	5.35293	5.14674	5.22908	5.15074
DHRS7__chr14	5.69793	5.72973	5.67121	5.60326	6.33103	6.34614	6.3081	6.27947	5.75628	5.59035	6.01757	5.48778
C10orf35__chr10	4.11297	3.78632	3.03895	3.43334	3.76543	3.86427	3.73386	3.79291	5.19574	5.41936	4.76964	5.90281
ACTR10__chr14	5.51214	5.65066	5.61788	5.68127	5.64513	5.73421	6.04291	5.89614	6.0768	6.1117	6.67654	6.51752
KIF1A__chr2	7.34563	7.41381	7.5578	7.10576	7.81157	7.47389	8.18745	8.04334	9.13682	9.01622	8.68851	8.6577
MANF__chr3	6.13089	6.2691	5.59966	5.60326	6.49661	6.54545	6.14288	6.20398	5.71343	5.1117	5.22908	4.90281
BUB1__chr2	5.02945	5.22884	4.52437	4.60326	4.61343	4.88893	4.54579	4.36193	3.16426	3.18096	3.76964	2.48778
FGFRL1__chr4	5.93059	6.09337	5.51143	5.43334	6.07577	6.20596	5.40188	5.57973	5.19574	4.46636	3.35461	4.07274
RUNX1T1__chr8	4.55923	3.92718	5.79917	5.71874	3.87646	4.36384	5.74186	5.34581	6.84829	7.07274	7.05505	7.71017
ACOX1__chr17	4.37601	4.0555	4.93619	4.43334	3.82201	4.09375	4.96993	4.75272	5.04258	5.19219	5.76964	5.90281
TRIM36__chr5	4.40575	4.30827	4.59966	4.43334	4.64513	4.621	4.6514	4.5519	5.04258	5.43835	5.22908	4.99028
SMARCA4__chr19	8.24945	8.34797	8.52196	8.42769	8.16597	8.14839	8.39936	8.51933	9.04403	8.99233	8.80307	9.1696
TPTE2P1__chr13	1.69793	1.50092	3.00242	1.43334	1.4435	1.81364	2.41194	2.57052	3.0768	3.93585	5.22908	4.36224
HDGF__chr1	9.05372	8.96852	8.50492	8.37585	8.87479	8.82806	8.69219	8.59402	8.27402	8.35214	7.93957	8.04236
PSMC2__chr7	6.20043	6.22202	5.9838	6.36408	6.581	6.49814	6.6127	6.59118	5.84498	5.86044	5.67654	5.48778
LOC646626__chr1	2.79104	2.82284	2.47191	2.0183	3.82201	3.00629	3.04937	3.118	2.24673	1.8814	1.76964	1.90281
KNTC1__chr12	4.44925	4.08588	3.94584	4.24069	3.2915	3.76117	3.45146	3.37258	2.24673	2.57328	1.76964	0.902813
EEF1A1__chr6	11.5368	11.4486	11.5766	11.5155	11.9025	11.6937	12.0228	12.1158	11.6151	11.5395	11.7654	11.7452
SSH2__chr17	3.03897	3.40781	3.80448	4.0183	3.3695	3.00629	3.96993	3.85497	4.50307	4.35088	4.577	4.99028
IQGAP1__chr15	6.13089	6.21516	5.78848	5.98793	6.35039	6.6062	5.98348	6.01982	5.68413	5.31024	4.93957	4.60325
SRGAP3__chr3	5.86251	5.61986	6.14747	5.9569	5.05231	4.56088	5.87137	5.71557	6.40323	6.49384	6.81404	6.92518
GLO1__chr6	7.67521	8.23393	7.23862	7.45571	7.93214	8.97207	7.49704	7.44246	6.99864	7.48474	6.72384	6.48778
NKAIN2__chr6	-1.20896	0.0858784	0.524373	2.0183	-0.878427	-0.993713	0.563939	0.985554	2.24673	2.50289	2.76964	3.22474
DNAJC9__chr10	6.05314	6.16625	6.1968	6.13378	6.155	6.22546	6.0168	5.89982	5.50307	5.51188	5.577	5.6577
GAPDH__chr12	12.0287	11.8802	11.5047	11.9272	12.2758	12.2536	12.4798	12.4236	11.5816	11.4122	11.1938	11.2382
SMIM7__chr19	5.85713	5.69074	5.4918	5.38754	5.84949	5.92515	5.84934	6.04667	5.22655	5.23624	4.76964	4.90281
LOC100129550__chr3	3.34563	3.67084	3.96495	4.0183	3.20904	2.91318	3.28641	3.30748	4.18533	4.72012	4.35461	4.48778
ADAM9__chr8	4.92033	4.84077	5.5812	5.38754	5.87646	5.99497	6.02991	6.29354	4.70616	4.44775	4.09157	4.48778
SKA3__chr13	4.80227	4.54531	4.41746	3.89277	3.92893	4.17621	4.04937	3.58889	2.24673	2.76592	2.76964	2.90281
C1orf61__chr1	6.05783	5.54531	8.34455	8.06996	4.794	3.70673	6.92501	6.31302	4.39873	4.556	6.577	6.85701
CENPF__chr1	7.32047	7.48106	7.43641	7.26623	6.69143	7.04521	7.19038	6.84926	5.71343	6.2947	5.577	6.32908
EML3__chr11	3.18336	3.54531	3.14328	3.24069	2.92893	2.59125	2.24201	2.192	2.60036	2.18096	1.76964	1.90281
ANKRD50__chr4	4.88907	5.21516	5.16823	5.29132	5.18766	5.32821	5.62572	5.13686	5.96554	5.88832	6.22908	5.8097
SFRP2__chr4	5.2829	5.17334	5.52437	5.0183	3.76543	2.59125	3.76557	3.66015	1.66176	1.8814	3.35461	0.902813
YARS__chr1	5.59194	5.8138	5.17645	5.24069	6.04044	6.19611	5.95626	6.12746	5.50307	5.57328	5.35461	5.36224
BAZ2B__chr2	5.15736	5.20136	5.4105	5.71874	4.61343	4.49814	5.0875	4.68599	5.48619	5.63217	6.01757	5.60325
SBK1__chr16	7.32437	7.15197	8.05352	7.67174	7.62142	7.15603	7.95969	7.75679	9.10885	9.26709	8.82493	9.15548
PSMA1__chr11	7.05783	7.00871	6.75044	6.70013	7.25086	7.28706	7.1757	7.15856	6.78761	6.94251	6.52453	6.71017
SYT3__chr19	2.3146	1.82284	2.67121	2.75527	1.12157	2.59125	2.48994	2.32951	4.85816	5.12347	4.76964	4.36224
SPTSSA__chr14	5.22567	5.37128	5.38944	4.89277	5.56452	5.63564	5.53663	5.29074	4.98369	4.75081	4.35461	4.22474
PRPS2__chrX	6.08106	5.7583	4.41746	4.89277	5.99194	5.46572	4.82697	4.57973	4.05408	4.01385	3.76964	2.90281
NAP1L1__chr12	8.81063	8.86176	8.59737	8.63301	8.60135	8.57804	8.52972	8.39494	8.24798	8.48702	8.27744	8.26036
BSG__chr19	7.09025	7.08212	6.60271	6.47773	7.20904	7.17119	6.88947	7.0533	6.31997	6.52969	6.16196	6.29513
PSD__chr10	3.0005	3.71037	4.10934	3.89277	3.20904	2.81364	3.76557	3.76085	5.29597	5.33071	5.35461	4.99028
MKI67__chr10	7.34179	7.30505	7.14328	7.13378	6.88976	6.65734	6.80425	6.90166	5.63904	5.75081	6.16196	4.99028
MYH9__chr22	8.71214	8.85406	8.05798	8.0627	9.45025	9.87588	8.54693	8.82282	8.77811	8.39649	7.74692	7.71017
RAB15__chr14	5.04843	4.99277	5.33907	5.07719	4.64513	4.49814	4.88587	4.77697	5.85816	5.56466	5.47008	5.99028
TAC3__chr12	1.25047	0.822844	1.80448	0.433339	2.12157	1.00629	2.56394	2.64267	3.98369	3.31024	3.76964	3.48778
PACS2__chr14	4.85713	4.82284	5.26391	5.0183	5.3114	4.88893	5.27543	5.3884	5.96554	6.00114	5.76964	6.15074
CYB5B__chr16	7.98949	7.94593	7.63886	7.60326	7.94175	7.84549	7.86955	7.84258	7.44531	7.22535	7.09157	7.34576
SPAG5__chr17	4.95091	4.54531	4.63588	4.24069	4.20904	4.36384	4.47083	4.09247	2.72066	2.50289	3.76964	2.48778
NBEA__chr13	6.23399	5.79554	6.37523	6.66216	5.73628	5.72053	6.69322	6.24512	7.97616	7.71623	7.87817	7.44197
VAMP2__chr17	7.07644	7.13027	7.82685	7.71874	7.46587	7.21086	8.10155	7.75476	8.23793	8.37078	8.47008	8.51752
CEP55__chr10	5.3835	5.32109	4.81505	5.60326	5.16597	5.48202	4.84192	4.70297	3.72066	3.8814	3.76964	4.07274
IRF2BP2__chr1	6.25865	5.91031	6.80977	6.45571	6.24051	6.30091	6.48042	6.52591	7.27892	7.25242	7.32423	7.26036
PHF21B__chr22	5.44209	5.32109	6.40352	6.47773	5.76543	5.02865	6.66408	6.2509	7.47981	7.52081	7.49756	8.04236
STMN4__chr8	5.66756	5.8047	7.23075	7.04805	6.19839	5.82647	6.88226	6.63163	8.44967	8.51635	8.3395	8.56815
CACNB1__chr17	3.14859	3.08588	4.17645	4.24069	2.92893	2.70673	3.37129	3.64267	5.3622	5.09982	5.67654	4.8097
CENPV__chr17	6.84633	6.93971	6.65071	6.43334	6.30148	6.25421	6.36095	6.3404	5.84498	6.1176	5.85711	5.48778
ZNF428__chr19	6.51896	6.38356	6.92403	6.45571	6.41619	6.58372	7.32416	7.14775	7.17483	7.5797	7.95947	7.60325
DTX1__chr12	1.69793	1.50092	2.76141	1.43334	0.706535	2.00629	2.76557	2.1431	3.69151	3.79567	4.35461	4.48778
P4HA1__chr10	3.54593	3.6302	2.92647	3.43334	4.07577	3.96048	2.88587	3.09247	3.031	2.42889	1.76964	1.90281
CMC1__chr3	4.80227	4.71037	4.63588	4.5208	4.95446	4.81364	4.59956	4.87757	3.98369	4.22535	4.09157	3.71017
TMCC2__chr1	4.87851	4.69074	5.41746	5.18823	4.794	4.52985	5.63433	5.23348	6.31521	5.98186	6.09157	6.51752
HDAC2__chr6	9.05196	8.9807	8.89007	9.08797	9.07867	8.86115	8.96908	9.02489	9.30442	9.28818	9.3917	9.59281
ANKMY2__chr7	5.32242	5.08588	5.07457	5.0183	4.47912	4.29169	5.0102	4.60704	5.78416	5.75839	5.67654	5.6577
KLHDC5__chr12	4.72178	4.7677	4.86676	4.89277	4.794	4.67871	5.26438	4.82427	5.40772	5.47558	5.577	5.8097
BTBD10__chr11	6.48104	6.3589	6.73383	6.64279	7.04044	7.13041	6.87501	6.98555	7.24923	7.22535	7.29321	7.34576
EXOSC8__chr13	4.77973	4.60944	4.4852	4.43334	4.54784	4.21574	4.61705	4.47494	3.56865	3.60722	2.76964	3.22474
FEZ2__chr2	5.56583	5.52328	5.7057	5.82566	5.64513	5.51408	5.62572	5.76893	5.06549	5.22535	4.93957	5.07274
REEP4__chr8	5.49148	5.43165	4.89693	5.07719	5.27132	5.07238	4.74981	4.80081	4.09917	3.96232	4.35461	3.71017
MRPL47__chr3	8.74742	8.74171	8.47857	8.42769	8.84096	8.92961	8.87319	9.00108	8.41888	8.40978	8.14468	8.22474
RFC4__chr3	4.69793	4.96035	4.8463	4.24069	4.02846	4.621	4.37129	4.118	3.60036	3.85338	3.35461	2.48778
PPP2R3A__chr3	5.49148	5.59895	5.73383	5.34023	5.12157	4.83918	5.78891	5.21585	6.81151	6.73171	6.52453	7.0321
PRKDC__chr8	8.09938	8.13935	7.94824	7.72796	7.699	7.44923	7.75574	7.66666	7.29112	7.26577	7.19591	7.15074
GNG4__chr1	6.76259	6.93137	7.15165	6.75527	6.7289	6.69977	7.31079	7.11959	7.54032	7.83021	7.76964	7.93624
ERCC6L__chrX	3.4349	3.40781	3.17645	3.89277	2.2915	2.59125	2.32947	2.67743	1.66176	1.64039	1.76964	0.902813
DDX5__chr17	8.83748	8.7583	8.99081	8.93716	8.60539	8.63564	8.8185	8.79884	9.20866	9.09609	9.08253	9.37855
NISCH__chr3	6.09025	6.10083	6.32804	6.38754	5.83582	5.46572	6.11238	5.93975	6.53623	6.70452	6.62763	6.83355
EIF4EBP2__chr10	9.4546	9.42052	9.62391	9.19821	8.64317	8.66628	8.86863	8.7654	9.48035	9.26776	9.30103	9.02693
HSPA8__chr11	10.0202	10.0047	9.93012	10.0536	10.2163	10.2894	10.4967	10.5404	9.89258	9.83425	9.98881	10.0752
TBCB__chr19	8.61759	8.61726	8.43897	8.57289	9.09455	8.87047	9.03317	9.11246	8.89218	8.99474	8.99846	9.01134
ICA1L__chr2	4.83544	4.67084	5.16823	4.34023	3.82201	4.00629	4.28641	3.94333	4.66176	4.93585	5.47008	4.48778
TOMM6__chr6	9.37036	9.53571	9.24694	9.25352	9.50312	9.46674	9.46481	9.6699	8.60916	8.86132	8.89893	8.93624
HSP90AB1__chr6	10.8438	10.6796	10.4103	10.1664	11.1464	11.0767	11.0792	10.9718	10.3877	10.3779	10.105	10.293
NFASC__chr1	2.03897	2.82284	3.33173	1.43334	2.70654	2.46572	3.48994	2.8397	4.89698	5.08785	4.93957	5.22474
TNFRSF10D__chr8	3.64902	3.20136	3.24058	4.0183	5.16597	4.88893	4.7966	4.98555	3.46912	2.26842	2.76964	1.90281
HECTD4__chr12	5.21731	5.08588	5.16823	4.75527	4.70654	4.81364	5.3081	4.72806	6.39421	6.19219	5.85711	6.0321
CRABP1__chr15	2.49148	2.20136	3.76141	4.24069	1.70654	2.17621	3.48994	3.76085	5.20608	5.53851	5.47008	5.54667
BOLA3__chr2	6.41675	6.45511	6.30198	5.98793	7.02846	6.68577	6.81187	6.77697	6.26168	6.20333	5.76964	5.71017
P4HB__chr17	6.81895	7.01267	6.67121	6.36408	7.14394	7.49814	7.06219	6.97336	6.59644	6.49384	6.47008	6.36224
NCOA1__chr2	5.29089	5.08588	5.83076	5.82566	5.02846	4.78765	5.40188	5.20993	6.0368	5.92915	6.01757	6.11227
AKAP9__chr7	4.49148	4.17334	5.01164	5.13378	4.61343	4.3986	5.16087	4.8397	5.4605	5.65669	5.85711	5.71017
BIRC5__chr17	6.38723	6.39573	6.00242	5.5208	5.70654	5.85178	5.51814	5.77295	4.56865	4.53851	4.76964	3.48778
GPD2__chr2	3.74524	3.89323	3.71702	3.60326	3.64513	4.00629	3.32947	4.01303	2.83169	2.64039	1.76964	1.90281
LOC642236__chr9	0.112971	0.500916	2.41746	3.43334	1.4435	2.17621	3.56394	3.01303	3.031	5.42889	7.32423	5.90281
TIGD1__chr2	3.79104	3.30827	4.0208	3.75527	3.70654	3.96048	4.37129	4.118	4.50307	4.50289	4.76964	4.60325
XRCC6__chr22	7.95091	7.79783	7.56564	7.5208	7.88644	7.87973	7.79852	7.80377	7.34593	7.38063	7.05505	6.71017
MMAA__chr4	3.25047	3.30827	3.88694	3.75527	2.82201	2.46572	3.32947	3.30748	3.56865	4.1117	5.09157	5.07274
RBM41__chrX	3.5984	3.78632	3.9838	3.43334	2.82201	3.25421	3.09999	3.192	3.93478	3.96232	4.577	4.22474
TMEM167A__chr5	7.06251	7.0323	6.95781	6.84273	7.09312	7.28706	7.21355	7.08115	7.39195	7.51188	7.551	7.1696
FGFR2__chr10	4.95091	5.18742	5.61788	5.56262	3.92893	3.86427	4.92851	4.63384	2.72066	3.03894	4.577	2.90281
EIF1B__chr3	7.25865	7.22543	7.51792	7.18823	7.2196	7.54156	7.54351	7.50791	7.98819	8.05286	8.03643	7.7483
FEZ1__chr11	7.10619	7.00871	7.661	7.39912	6.88976	6.67871	7.37129	7.18598	8.09082	8.06054	7.93957	8.15074
RPS2__chr16	10.979	10.7318	10.2711	10.3462	11.2949	11.0741	10.8736	10.8347	10.717	10.3186	10.4099	10.122
SLC1A3__chr5	4.21731	3.85847	5.72824	5.47773	3.4435	2.00629	3.70144	3.26239	0.0768006	-0.234079	3.35461	1.90281
PRKAR1B__chr7	5.12196	5.10083	5.15996	5.13378	5.07577	4.25421	4.82697	4.99247	6.06549	6.24705	6.01757	5.94721
IER3IP1__chr18	5.75104	5.54531	5.36087	5.89277	5.76543	5.81364	5.74981	5.62941	4.97162	5.13515	4.76964	4.90281
MPC1__chr6	7.37601	7.27899	7.58275	7.59321	7.70654	7.85804	8.07332	7.95311	7.78588	7.85161	8.22908	7.83355
DCC__chr18	4.14859	4.11563	4.91669	4.60326	4.33103	4.21574	4.43184	4.29634	6.71343	6.81395	5.67654	6.60325
SYP__chrX	3.5984	3.54531	4.44494	4.24069	3.2915	3.32821	4.02337	4.22763	5.69885	5.80301	5.47008	5.36224
CCT8__chr21	7.8327	7.80241	7.575	7.79089	8.06115	7.97783	8.04776	7.909	7.69702	7.53631	7.44207	7.39467
UBE2H__chr7	7.40575	7.3805	7.3965	7.10576	7.53096	7.69628	7.4636	7.63274	8.28259	8.25644	7.91939	7.82168
SYN1__chrX	3.96097	4.0555	5.36087	5.29132	4.581	4.05068	5.4994	5.25666	7.0768	7.06665	6.72384	7.09264
CLTB__chr5	6.74814	6.80012	6.81505	6.29132	7.13838	7.45337	7.63647	7.21141	7.67299	7.6808	7.47008	7.56102
HMGA2__chr12	7.05079	7.19091	5.80977	6.31598	6.49661	6.4901	5.77339	5.57513	4.89698	4.59035	4.76964	4.71017
SEPT3__chr22	6.91258	7.14837	7.6314	7.22775	6.5562	6.49814	7.27818	7.3336	8.47768	8.60302	8.29321	8.41851
TANC2__chr17	4.97095	5.00871	5.43126	5.68127	4.76543	4.67871	4.98348	5.01303	5.75628	5.92915	5.76964	6.78546
LIN7B__chr19	3.2829	3.08588	3.10934	3.60326	3.12157	2.91318	3.59956	3.23931	3.95944	4.31024	4.76964	4.48778
SLITRK2__chrX	2.96097	2.89323	3.73939	3.60326	1.12157	1.32821	2.48994	2.80868	1.39873	1.64039	1.76964	2.48778
ANXA7__chr10	4.73356	4.60944	4.10934	4.5208	4.61343	5.05068	4.39176	4.82427	3.90969	3.93585	3.35461	4.22474
ARHGEF6__chrX	3.92033	3.92718	3.73939	4.24069	2.2915	2.17621	3.04937	2.60704	2.0768	1.76592	1.76964	0.902813
ANP32E__chr1	7.16608	6.86724	6.93134	7.00319	6.76543	6.74775	6.55942	6.60253	5.56062	5.75839	6.16196	5.22474
PTTG1__chr5	7.23813	7.07456	6.63886	6.87628	7.39304	7.00629	7.03967	6.98902	5.95332	5.82481	6.22908	5.29513
FAM57B__chr16	1.96097	1.96035	2.88694	2.75527	2.2915	2.70673	3.09999	2.53304	4.24673	4.50289	4.35461	3.71017
CSDE1__chr1	8.94649	8.99177	8.90684	8.95297	9.24569	9.03695	9.25952	9.15971	9.3002	9.3977	9.38435	9.41457
MRPL49__chr11	6.29884	6.24238	6.06131	6.24069	6.52245	6.52199	6.14288	6.23056	5.72785	5.54728	5.67654	5.8097
TAGLN3__chr3	6.73356	6.71037	7.42782	7.34023	6.77978	6.76784	7.6127	7.54603	8.13479	8.37202	8.22908	8.29513
GNG11__chr7	6.8327	6.98876	6.30947	6.0183	7.52671	7.26367	6.5774	7.01813	6.31521	6.20886	4.76964	5.36224
STAM2__chr2	5.29089	5.24238	5.79383	5.43334	4.90293	5.11481	5.36095	5.0533	6.13208	6.08183	6.35461	5.60325
KBTBD11__chr8	4.3609	3.89323	5.2484	4.5208	4.581	4.05068	4.81187	4.5425	5.75628	5.44775	5.85711	6.48778
SLC25A39__chr17	7.08796	7.1698	7.00473	6.92519	7.10457	6.80719	7.16087	6.94867	6.60818	6.48474	6.577	6.42637
DACT1__chr14	2.03897	1.96035	3.00242	1.43334	1.70654	1.00629	2.88587	2.09247	3.56865	3.90888	4.76964	4.90281
FZD2__chr17	7.38163	7.39573	6.74768	6.92519	6.66847	6.63564	6.3453	6.1462	6.08803	5.8952	6.22908	5.48778
ANXA6__chr5	6.17475	5.99277	5.87184	6.24069	6.155	6.27307	5.87864	5.75679	5.37142	5.38063	4.93957	5.36224
FERMT2__chr14	4.73356	4.94386	4.52437	5.0183	5.56452	5.36384	4.95626	5.26811	4.64666	4.44775	4.35461	4.36224
POLR2G__chr11	7.56418	7.51494	7.36087	7.26623	7.56866	7.54156	7.74584	7.4737	6.92855	6.94914	6.93957	7.05256
NAA50__chr3	6.80506	7.08588	6.40352	6.77319	6.96078	6.64291	6.52278	6.44246	6.0368	6.13515	5.47008	5.99028
OXA1L__chr14	5.87851	5.71037	6.11362	6.16126	5.2915	5.19611	5.55489	5.45504	5.6237	5.556	5.76964	5.48778
EIF4G2__chr11	10.197	10.1515	10.2947	10.5458	10.4592	10.4331	10.5597	10.5141	10.7459	10.661	10.6705	10.914
FBLL1__chr5	4.4349	4.74884	5.19275	5.18823	4.25086	4.32821	5.3081	4.9786	5.82499	6.1117	6.01757	5.94721
SCN3A__chr2	2.25047	2.08588	3.62391	4.13378	2.12157	2.91318	3.1489	3.28511	5.11022	5.2999	5.35461	5.29513
C12orf45__chr12	4.79104	4.99277	4.33173	4.9569	5.581	5.86427	5.55489	5.46004	4.69151	4.73555	4.09157	3.90281
DAP__chr5	5.90478	5.87596	5.79917	5.98793	6.16597	6.24469	5.71774	6.00963	5.37142	5.47558	4.76964	4.8097
CCDC23__chr1	5.34563	5.10083	5.21686	5.68127	5.02846	4.86427	5.26438	4.96459	6.31997	6.25242	6.67654	5.94721
APC2__chr19	5.91516	5.93554	6.48851	5.98793	5.54784	5.27307	6.32947	6.21289	8.09917	7.92074	7.49756	7.58931
HSDL1__chr16	4.93059	4.85847	5.45848	5.0183	4.73628	5.02865	5.60833	5.40406	6.19054	6.21438	6.09157	6.60325
C6orf62__chr6	5.49148	5.57773	5.81505	6.04805	5.91599	5.99497	6.28093	6.20695	5.98369	5.94251	6.16196	6.39467
JPH3__chr16	4.11297	4.02448	4.82554	5.18823	3.64513	4.00629	4.3081	4.48479	6.08803	6.18096	6.35461	5.6577
NDFIP1__chr5	6.82996	6.67584	7.16823	7.07719	6.93535	6.621	6.97333	6.89982	7.18271	7.17248	7.76964	7.57524
LINC00622__chr1	1.11297	0.822844	2.575	1.43334	2.12157	1.81364	2.24201	1.28511	4.20608	3.76592	3.76964	4.22474
ZNF627__chr19	4.29884	4.50092	4.62391	4.75527	5.02846	4.73421	5.19621	4.94333	5.22655	5.556	6.22908	5.71017
RAB35__chr12	3.18336	3.54531	3.41746	2.75527	4.07577	4.49814	4.24201	4.1431	3.63139	4.20333	4.35461	4.07274
GCA__chr2	4.4204	4.02448	4.6828	4.5208	3.20904	4.00629	4.0749	3.99936	2.98369	2.42889	2.76964	2.48778
NPDC1__chr9	4.16608	4.20136	4.59966	4.60326	4.20904	4.13557	4.54579	4.74455	5.17483	5.13515	5.22908	5.07274
FGFR1__chr8	8.61839	8.40178	8.83336	8.83422	8.2915	7.93998	8.2406	8.18145	7.68043	7.55382	7.09157	7.09264
EPB41L4B__chr9	0.791043	0.0858784	2.17645	0.433339	0.121573	0.00628651	1.41194	0.744546	1.66176	2.18096	4.577	2.48778
PCGF3__chr4	6.22983	6.15913	6.49838	6.26623	6.18766	6.23511	6.1549	6.33224	6.95944	6.70452	6.85711	6.7357
TAGLN2__chr1	5.64279	5.64047	5.08334	5.13378	7.48352	7.57234	5.87864	6.47987	5.72066	5.23624	5.09157	4.8097
IGF2BP1__chr17	7.52066	7.50092	6.56564	6.56262	7.16597	7.14071	6.2307	6.38051	6.32947	6.24165	5.93957	5.90281
SHC1__chr1	6.17906	6.38356	4.78311	5.13378	6.78691	7.16616	5.9355	6.33496	6.13208	5.67281	4.577	5.22474
PDHA1__chrX	6.75971	6.77238	6.35364	6.34023	6.77262	6.85804	6.36095	6.31302	6.47341	6.41458	5.67654	5.6577
DARC__chr1	0.960968	0.500916	2.24058	1.43334	0.121573	0.00628651	2.48994	2.53304	3.90969	3.42889	4.35461	4.07274
GANAB__chr11	5.70393	5.68083	5.52437	5.38754	5.62937	5.6062	5.80425	5.74044	5.11022	5.00114	4.577	4.71017
CA11__chr19	3.2829	2.96035	3.24058	2.75527	3.2915	2.32821	3.37129	3.192	4.74923	4.73555	4.35461	4.36224
ATP6V1G2__chr6	5.85713	5.73932	6.61486	6.43334	6.35998	6.4575	6.74186	6.53778	7.66176	7.89349	7.65229	7.34576
ACTR1A__chr10	7.73649	8.17864	7.70001	7.68127	7.84609	7.98928	8.10155	7.96195	8.75099	8.87008	8.49756	8.38663
CDKN3__chr14	5.66756	5.70059	5.5308	4.9569	4.87646	5.46572	5.61705	5.24512	3.77724	3.85338	4.09157	4.22474
CYFIP2__chr5	5.50529	5.4782	5.78311	5.82566	6.06409	5.8007	5.90022	5.98208	6.32947	6.33578	6.22908	6.32908
PGD__chr1	8.13534	7.9583	7.78982	7.66216	8.3695	8.41143	8.35575	8.54486	7.81995	7.78273	7.72384	7.57524
CALU__chr7	7.03897	7.11194	6.83855	6.87628	7.24051	7.27307	6.95282	6.99247	6.65045	6.17531	5.67654	5.48778
HTRA1__chr10	1.69793	2.20136	2.67121	2.43334	1.4435	1.59125	2.63433	2.28511	0.884156	0.988313	1.76964	0.902813
SFT2D1__chr6	3.51896	3.74884	3.20887	3.0183	4.54784	4.67871	3.59956	4.22763	2.77724	2.8814	1.76964	0.902813
SH2D3C__chr9	5.08566	4.74884	5.72824	6.07719	5.00422	4.29169	5.17275	5.01982	7.05979	7.2999	6.62763	7.1696
PRDX4__chrX	6.40943	6.38966	5.67702	5.75527	6.5562	6.63564	5.92149	6.1306	5.50307	5.2999	4.09157	5.29513
SPTBN1__chr2	6.48104	6.57238	6.64183	6.84273	6.4879	6.71365	6.71369	6.59345	7.19574	7.24435	7.01757	7.26036
RBFOX2__chr22	6.54259	6.28228	6.76687	6.58309	6.46142	6.38999	6.83447	6.48724	7.70616	7.86921	7.32423	7.91404
FBXO5__chr6	4.25047	4.56701	4.03895	5.0183	3.70654	3.91318	3.82697	3.92897	2.98369	2.93585	3.35461	3.22474
LOC441204__chr7	3.34563	2.74884	3.59966	3.89277	2.2915	2.17621	2.9969	2.92897	4.20608	4.75081	4.76964	4.22474
ZYX__chr7	8.04725	7.90818	8.20687	7.93318	8.71029	8.72739	8.52857	8.83682	8.11022	7.67281	7.70038	7.53217
GART__chr21	6.51896	6.44928	6.27926	5.71874	6.54784	6.56088	6.31347	6.60253	5.25671	5.25777	4.09157	4.90281
SEC11C__chr18	6.35329	6.43165	6.4852	6.54186	6.88976	7.06698	7.19621	7.3144	7.05122	7.32816	7.9791	7.39467
NASP__chr1	7.467	7.45511	7.27735	6.94113	6.80105	6.86427	6.93201	6.76489	6.32473	6.23081	5.577	6.15074
EFNB3__chr17	5.61122	5.38356	5.66538	5.29132	5.49661	5.19611	5.66828	5.41954	6.71343	7.02958	6.29321	6.7357
IFI6__chr1	4.50529	4.2558	3.73939	4.13378	3.97955	3.81364	3.45146	3.4144	3.53623	3.13515	2.76964	3.48778
BIVM__chr13	3.83544	3.96035	4.14328	4.24069	2.92893	3.65014	3.37129	3.28511	3.93478	4.48474	4.09157	4.07274
HNRNPM__chr19	8.65213	8.7128	8.53879	8.38171	8.59731	8.53181	8.87773	8.73838	7.89698	7.96559	7.551	7.79763
SEC22B__chr1	6.40207	5.97665	6.26776	6.13378	6.62142	6.29169	6.44658	6.56356	6.08243	5.80301	5.577	5.60325
PRPS1__chrX	6.31852	6.08588	6.3788	6.70013	6.17686	6.02865	6.69322	6.75068	5.5846	5.50289	5.93957	6.36224
TIMM10B__chr11	5.72768	6.07834	5.65953	5.75527	6.19839	6.25421	5.98348	6.04667	5.01932	5.59035	5.22908	5.54667
DNAJC6__chr1	3.25047	3.50092	3.96495	2.43334	3.20904	4.00629	3.9969	4.1431	5.56865	5.34083	5.67654	5.42637
GABRG2__chr5	0.791043	1.30827	2.03895	0.433339	0.121573	-0.993713	1.24201	0.744546	2.98369	3.79567	4.09157	2.90281
WWTR1__chr3	4.67369	5.02448	5.68856	5.79089	4.90293	4.96048	4.6514	5.20398	3.69151	3.39041	3.35461	4.22474
RPA3__chr7	5.11297	5.20136	5.10934	4.60326	5.18766	5.25421	4.87137	5.11166	4.38058	4.15824	4.35461	4.07274
KDELR2__chr7	6.5724	6.51214	6.09206	6.62316	6.86304	6.98928	6.52741	6.7322	6.40772	6.10577	5.93957	6.07274
SAC3D1__chr11	6.02466	5.92718	6.0299	5.64279	6.05231	6.09375	6.38156	5.99247	5.15362	5.24705	4.76964	4.07274
LMNB2__chr19	5.85713	5.8138	5.34637	5.43334	5.77978	5.48202	5.40188	5.35658	4.93478	4.94914	4.76964	4.07274
MID1__chrX	7.33601	7.28555	7.32064	6.82566	7.55203	7.44091	7.00688	7.23494	6.75628	6.73938	6.16196	6.15074
FAM155A__chr13	5.53251	4.65066	6.29822	6.70013	5.69143	5.15603	6.28093	5.89982	6.81151	7.08785	7.74692	7.8915
LOC254128__chr2	4.0005	3.92718	4.15996	4.0183	2.581	2.59125	3.1489	3.1431	3.031	3.22535	2.76964	3.22474
GSTA4__chr6	6.69191	6.70549	7.28307	7.44457	6.40698	6.13557	7.3	7.17233	7.77377	7.86395	8.1272	7.94721
PUM1__chr1	8.97282	8.97665	9.15321	8.96082	8.8798	8.75448	9.11546	8.94956	9.35815	9.28621	9.31654	9.39867
GRIA2__chr4	2.37601	2.67084	4.38944	4.82566	0.121573	1.32821	3.48994	3.62496	5.27647	5.31024	5.85711	6.0321
DDAH2__chr6	5.27486	4.99277	5.36087	5.18823	5.33103	5.05068	5.36095	5.39364	5.68413	5.72012	5.76964	6.11227
BTG3__chr21	7.13534	7.04007	7.38058	7.26623	7.42535	7.44091	7.41943	7.51273	6.54032	6.44305	6.47008	5.8097
PFDN2__chr1	8.14749	7.97462	8.17132	7.86797	8.43899	8.51408	8.65246	8.51634	8.43215	8.4836	8.87817	8.671
SNRPD1__chr18	6.97095	7.11563	6.68856	6.75527	7.19304	7.1862	7.14288	7.12274	6.45184	6.47558	6.577	6.54667
ACTB__chr7	12.4838	12.6344	12.5661	12.2439	12.4813	12.8342	12.6287	12.7489	12.0663	12.1319	11.8017	11.8779
KIF20A__chr5	6.33407	5.93554	5.89693	6.07719	6.02846	5.6645	5.35054	5.62496	4.43435	4.18096	4.93957	3.71017
PYGO2__chr1	5.76259	5.78632	5.30198	5.43334	5.38836	5.44923	5.18453	5.44499	5.08803	5.19219	4.577	5.07274
HADHB__chr2	6.76832	6.84077	6.55937	6.26623	6.80807	6.82007	6.89306	6.76691	5.95944	6.32562	5.67654	5.36224
SYNGR3__chr16	3.34563	3.85847	4.17645	4.34023	4.16597	3.81364	4.04937	3.64267	5.73501	5.50289	5.76964	5.15074
KIF3C__chr2	4.80227	4.89323	5.87689	5.34023	4.51389	4.621	5.24201	5.52352	6.66176	6.81032	6.47008	6.7357
DECR1__chr8	5.92033	5.88462	5.73383	5.68127	5.794	5.6062	5.9969	5.76085	5.04258	4.96232	4.35461	4.8097
NDUFS1__chr2	4.20043	3.96035	3.92647	4.0183	4.54784	4.3986	4.5088	4.44499	3.24673	3.60722	2.76964	2.48778
WASF2__chr1	6.3835	6.20136	5.97441	6.2147	6.42535	6.42414	6.32947	6.16163	5.82499	5.73555	5.577	5.15074
MYL9__chr20	8.42948	8.50092	7.98614	8.0258	8.88146	8.89959	8.76263	8.64212	8.25547	7.5861	7.01757	7.27785
RPL7__chr8	9.40022	9.32985	9.36268	9.40201	9.78691	9.72482	9.75327	9.66232	9.26539	9.33831	9.51784	9.44197
SLAIN1__chr13	4.54593	4.08588	4.61184	4.43334	4.25086	3.3986	4.3081	4.10529	4.85816	4.8952	5.85711	5.42637
GCSH__chr16	5.09482	4.89323	4.93619	4.89277	5.62937	5.44923	5.36095	5.17386	4.09917	4.15824	4.76964	3.90281
ABR__chr17	5.11297	5.15913	5.74492	5.47773	5.18766	4.52985	5.21929	5.12432	5.89698	5.98186	6.16196	5.99028
HS6ST3__chr13	0.112971	0.500916	2.8463	1.43334	-0.878427	0.00628651	0.563939	0.985554	1.66176	1.8814	4.35461	2.90281
DYNC1I1__chr7	3.07644	2.96035	4.30198	4.68127	2.2915	2.00629	4.39176	3.79291	4.55253	4.68875	5.35461	5.60325
TIPRL__chr1	6.05783	5.96035	6.40352	6.2147	6.32125	6.1862	6.43184	6.39625	6.5846	6.51188	6.81404	7.09264
PMAIP1__chr18	3.34563	3.30827	2.67121	3.60326	4.33103	5.09375	3.09999	4.15548	2.72066	2.35088	1.76964	2.48778
SASS6__chr1	3.96097	3.99277	3.47191	3.24069	3.76543	4.09375	2.88587	3.23931	2.39873	2.08785	1.76964	2.48778
CCDC82__chr11	5.83544	5.72973	6.25229	6.31598	5.97955	6.03971	6.02991	6.2188	6.56062	6.40013	6.62763	6.8097
MRPL35__chr2	4.09482	4.11563	3.88694	3.0183	4.54784	4.46572	4.28641	3.77697	3.80472	3.60722	2.76964	2.48778
SMIM14__chr4	4.20043	3.85847	4.76141	4.0183	4.73628	4.25421	4.52741	4.39364	5.27647	5.48474	5.47008	5.60325
IQCE__chr7	3.46347	3.54531	3.80448	3.89277	2.82201	2.00629	3.32947	3.3512	4.51974	3.8814	4.577	4.36224
PSMA4__chr15	6.65213	6.54531	6.57189	6.31598	6.87646	6.82007	6.88947	6.86254	6.33419	6.39041	6.577	6.22474
ADCY1__chr7	1.37601	1.30827	1.96495	1.43334	1.12157	2.17621	2.24201	1.92897	2.77724	3.18096	3.76964	2.48778
MTUS1__chr8	4.20043	3.74884	4.71702	4.24069	3.4435	2.70673	3.88587	3.95754	5.18533	5.32051	5.09157	5.36224
FOSL1__chr11	3.14859	3.20136	3.27161	2.43334	4.90293	4.76117	3.76557	4.49457	3.24673	3.26842	2.76964	2.48778
SEMA4D__chr9	5.51214	5.13027	5.62391	5.43334	4.64513	4.621	4.63433	4.65144	5.71343	5.58184	5.35461	5.22474
RRM1__chr11	5.85174	5.92718	5.73939	6.31598	5.86304	5.74775	5.47083	5.20398	4.60036	4.86746	4.35461	4.8097
ATF2__chr2	6.10846	5.98473	6.1179	6.10576	5.95446	5.43255	5.62572	5.46502	6.47768	6.0697	6.62763	6.57524
ENDOD1__chr11	3.0005	3.45511	3.44494	3.0183	3.64513	3.09375	3.1489	2.64267	1.98369	1.50289	1.76964	1.90281
LOC729013__chr11	5.03897	5.04007	4.7723	4.75527	4.82201	4.65014	4.6514	4.70297	4.5846	4.40978	4.35461	4.07274
NOTCH1__chr9	5.81895	5.8138	6.29822	6.07719	5.20904	5.34614	5.92149	5.79291	4.67671	4.556	4.35461	3.90281
TRAK1__chr3	5.70393	5.67084	5.89693	5.82566	5.38836	5.41568	5.52741	5.52829	6.24171	6.24705	5.93957	6.11227
PEG10__chr7	10.2173	10.2499	10.8542	10.7036	10.1796	9.985	10.3084	10.2927	11.9039	11.8019	11.2912	11.5422
PIF1__chr15	3.34563	3.02448	2.71702	3.24069	2.12157	2.17621	2.24201	1.53304	0.884156	1.18096	1.76964	0.902813
PSMB2__chr1	8.36185	8.34484	8.37344	7.85119	8.77262	8.65734	8.65034	8.5826	8.0768	8.11317	8.29321	7.82168
ATAD1__chr10	5.69191	5.74884	5.82031	5.56262	6.24051	6.621	6.39683	6.28793	6.21635	6.56466	6.47008	6.78546
EIF4H__chr7	9.00232	8.91137	8.90189	8.80838	9.03596	9.19735	8.82791	9.0194	8.60525	8.70256	8.48389	8.32067
MELK__chr9	5.69793	5.66079	5.40352	5.56262	4.95446	5.3986	4.81187	4.76893	3.85816	3.64039	4.09157	2.48778
ABCE1__chr4	4.72178	4.71037	4.43126	4.82566	4.54784	4.65014	5.11238	4.87757	3.60036	3.8814	3.35461	3.90281
L1CAM__chrX	3.5724	4.11563	5.37523	5.07719	5.16597	4.59125	4.91444	5.0989	7.24923	7.33324	6.9791	7.01134
COX4I1__chr16	9.36516	9.40856	9.36807	9.41348	9.84438	9.9064	9.68754	9.70797	9.79233	9.75129	9.90407	9.9608
SHFM1__chr7	7.5724	7.63534	7.52276	7.56262	7.52245	7.79419	7.71369	7.63716	7.15629	6.96232	6.62763	7.0321
SLC44A2__chr19	6.90998	6.91877	6.70286	6.70013	7.99194	7.65734	7.89306	7.7578	7.08523	7.18658	7.1272	6.36224
ALG5__chr13	7.00779	7.00871	6.91669	6.73712	7.16597	7.31917	7.02009	6.94154	6.67299	6.6808	6.35461	6.63073
MAP2__chr2	8.56912	8.55755	9.29445	9.27883	8.64709	8.44716	9.39239	8.95267	9.94253	10.1391	9.9791	10.1171
MPC2__chr1	5.69191	6.09337	5.78848	5.64279	5.794	6.10432	5.81187	5.64706	6.24171	6.38063	6.09157	5.85701
MN1__chr22	6.07644	5.94386	6.31321	6.07719	5.83582	5.43255	6.1489	5.62496	6.7098	6.62804	6.81404	7.27785
DAB2__chr5	2.64902	3.14477	3.07457	2.75527	3.20904	3.52985	2.88587	3.99936	1.88416	1.8814	1.76964	1.90281
GTF2A2__chr15	8.78256	8.74528	8.78781	8.6281	9.20904	9.22061	9.13607	9.09769	8.77464	8.86044	9.08253	8.8097
C16orf59__chr16	2.69793	2.74884	2.36087	2.43334	2.581	2.70673	2.1489	2.67743	1.77724	1.64039	1.76964	1.90281
KCTD7__chr7	3.69793	4.2558	4.14328	3.60326	4.2915	4.49814	4.02337	4.16776	4.53623	5.46636	5.22908	4.99028
HAUS6__chr9	5.09482	4.85847	4.7057	5.43334	4.51389	4.3986	4.28641	4.38315	3.72066	3.90888	4.09157	4.07274
CENPW__chr6	5.8838	6.10083	5.67702	5.5208	5.62937	5.74775	5.37129	5.60704	4.43435	4.28948	4.93957	3.90281
SMC2__chr9	5.22567	4.85847	5.20887	5.43334	5.00422	4.25421	4.92851	4.74455	3.88416	3.57328	2.76964	2.90281
RFK__chr9	4.54593	4.40781	5.09206	4.68127	5.07577	4.86427	5.24201	5.30748	5.25671	4.8952	5.67654	5.6577
ATXN7L3B__chr12	6.64279	6.51772	6.72545	6.5208	6.47912	6.44923	6.94245	6.909	7.33183	7.44775	7.32423	7.39467
SH3BP2__chr4	3.37601	3.40781	3.82554	3.24069	3.70654	3.3986	3.85672	3.95754	4.09917	4.50289	4.76964	4.60325
INPP5J__chr22	1.79104	2.08588	2.17645	2.0183	0.706535	1.32821	1.56394	1.98555	3.031	3.13515	2.76964	4.22474
SEPT9__chr17	7.66141	7.76066	7.68424	7.66216	7.7582	7.54932	7.61922	7.48969	7.06264	7.00751	6.35461	6.85701
FAM89B__chr11	7.79386	7.68331	7.99547	7.72796	7.6646	7.38999	8.03967	7.91811	8.68135	8.40375	8.58982	9.21115
GLRX3__chr10	5.64279	5.9018	5.47857	5.60326	5.90293	6.31007	5.96993	5.82815	5.37142	5.52081	5.47008	4.99028
AAMDC__chr11	4.25047	3.6302	3.59966	3.60326	4.25086	4.56088	4.24201	4.37258	2.88416	3.18096	1.76964	1.90281
LOC152217__chr3	8.71437	8.65953	8.98906	8.65734	8.84949	8.97063	9.08358	8.93885	8.37027	8.32179	8.1272	8.3122
UPP1__chr7	3.98087	4.17334	3.38944	3.75527	5.47912	5.36384	4.3081	5.03331	3.46912	3.26842	1.76964	3.90281
SORCS3__chr10	0.791043	0.822844	0.717018	0.433339	0.121573	-0.993713	1.24201	0.744546	2.39873	2.35088	4.09157	3.48778
PREX1__chr20	4.03897	4.14477	4.10934	3.43334	3.20904	3.25421	3.45146	2.89982	2.53623	2.57328	2.76964	0.902813
LIG4__chr13	3.37601	3.45511	3.64775	3.75527	4.20904	4.59125	3.88587	4.01303	4.94717	4.79567	5.09157	5.60325
TMEM132A__chr11	6.68283	6.65573	6.32435	6.2147	6.41619	6.1862	6.54579	6.52352	7.3506	7.24974	7.32423	7.11227
ORAI1__chr12	3.49148	3.40781	3.14328	3.75527	3.581	3.59125	3.24201	3.57052	2.32473	2.42889	2.76964	2.48778
PARP6__chr15	4.37601	4.28228	5.30198	5.38754	4.25086	4.21574	5.0749	5.118	6.06549	6.09385	5.76964	6.8097
SRSF4__chr1	5.96597	6.13027	6.3354	6.10576	5.53096	5.6062	5.76557	5.61603	5.70616	5.64039	5.577	5.76079
EPHA2__chr1	5.57895	5.72008	4.97441	4.82566	6.33103	6.27307	5.31883	5.55658	5.44312	5.08785	4.09157	4.8097
ATP6AP1__chrX	5.97592	5.68083	6.18462	5.8596	6.50528	6.02865	6.70144	6.42467	6.68043	6.8212	6.89893	6.51752
DRG1__chr22	5.3302	5.38356	5.04793	5.13378	5.70654	5.73421	5.57293	5.43486	5.15362	4.97537	4.93957	5.15074
ROBO1__chr3	4.23399	4.20136	5.75044	5.24069	3.76543	3.70673	4.76557	4.06647	5.92229	6.02016	6.4135	5.48778
TEAD1__chr11	6.69793	6.79554	6.50818	6.84273	6.82893	6.74775	6.73386	6.79093	6.49043	6.42413	6.22908	6.29513
B4GALNT4__chr11	6.35329	5.96852	6.29445	6.0183	5.40698	5.13557	5.66828	5.70297	6.3389	6.38553	6.29321	6.57524
VEZF1__chr17	6.63025	6.40781	6.83855	6.71874	6.02846	5.74775	6.225	6.1462	6.69519	6.61141	6.52453	6.57524
LYPLA1__chr8	5.17475	5.0555	5.03895	4.5208	5.75093	5.57614	5.37129	5.43486	5.19574	5.20333	4.93957	4.8097
SOD1__chr21	8.59679	8.51772	8.35545	8.45015	8.63924	8.66984	8.72583	8.62274	8.1116	8.08183	8.27744	8.22474
MLL3__chr7	3.51896	3.92718	3.64775	3.75527	3.82201	3.86427	3.96993	4.21585	4.3622	4.82481	4.35461	5.22474
DNAJC5__chr20	6.3302	6.30182	6.25618	6.07719	6.42535	6.54545	6.35054	6.21585	7.26909	6.98509	6.62763	6.68417
FGFR3__chr4	5.39096	5.37128	4.81505	4.82566	4.51389	3.91318	4.35054	5.02658	2.53623	2.42889	3.35461	3.22474
HAT1__chr2	5.97095	5.64047	6.39297	6.13378	5.3695	5.83918	6.45146	5.95754	4.85816	5.02645	5.47008	5.36224
TXN__chr9	8.724	8.74884	8.32527	8.36408	9.21565	9.39968	9.05579	9.26025	8.37715	8.51747	8.64001	8.49527
ADRM1__chr20	6.26272	6.02448	5.67702	5.68127	6.49661	6.31007	6.17275	6.25378	5.90335	5.66477	4.93957	5.48778
PSMD8__chr19	5.92033	5.99277	5.8463	5.71874	6.49661	6.48202	6.5088	6.50428	6.18533	6.36087	6.16196	6.51752
PRCP__chr11	5.36847	5.54531	5.82554	5.29132	4.82201	4.621	4.91444	5.03331	4.34359	3.82481	3.35461	3.90281
NUDT5__chr10	5.04843	5.02448	4.6943	4.89277	5.05231	5.56088	5.43184	5.32951	4.50307	4.53851	4.577	4.36224
UBE2L3__chr22	7.63182	7.63791	7.47691	7.39912	7.77262	7.95465	7.72583	7.80966	7.58261	7.43599	7.35461	7.37855
PPP1R3F__chrX	1.79104	0.822844	2.03895	1.43334	2.12157	1.32821	1.41194	1.53304	3.031	3.08785	3.76964	4.22474
WDR35__chr2	3.34563	3.45511	3.41746	3.24069	3.3695	3.00629	3.1489	2.95754	2.77724	2.35088	1.76964	1.90281
TEX30__chr13	5.10393	4.6302	4.87689	4.9569	4.51389	4.65014	5.0875	4.97161	3.60036	3.79567	3.35461	4.07274
RAE1__chr20	6.39096	6.45511	5.6943	6.07719	6.51389	6.40717	5.98348	6.11484	6.04258	5.94914	5.35461	5.85701
RAPGEF1__chr9	4.81341	4.52328	4.82554	4.75527	4.3695	4.36384	4.84192	4.94333	5.89058	5.60722	5.35461	5.85701
DPYSL2__chr8	9.44434	9.59763	9.93588	9.75075	9.39187	9.14328	9.74186	9.58432	10.2592	10.368	10.2413	10.2604
WBP5__chrX	6.85982	6.71037	6.5812	6.49943	7.16597	7.20596	6.82321	6.79884	6.39421	6.45242	6.52453	6.26036
LOC158696__chrX	4.05783	3.30827	3.82554	3.60326	2.92893	2.81364	2.88587	3.1431	4.20608	5.02645	4.76964	4.48778
KCNAB2__chr1	3.40575	3.20136	3.30198	3.43334	2.4435	3.00629	3.91444	3.71138	4.77724	4.98831	5.47008	4.71017
DBNDD1__chr16	5.90998	5.72008	6.16823	6.29132	6.26112	5.81364	6.37644	6.04334	7.12937	6.95904	6.76964	7.0321
C21orf58__chr21	4.23399	4.30827	4.5372	4.24069	3.70654	3.65014	3.37129	3.4144	3.3622	3.31024	3.35461	3.71017
TOP2B__chr3	7.34371	7.19788	7.92769	7.77319	7.3977	7.20596	7.9162	7.69238	8.0768	8.11907	8.22908	8.66436
RAB6B__chr3	4.5724	4.58838	5.74492	5.24069	4.20904	4.17621	5.26438	5.07302	6.70251	6.80667	6.577	6.32908
LHX2__chr9	5.09482	5.17334	5.62991	6.13378	4.12157	3.70673	5.41194	5.57513	2.46912	3.26842	4.09157	3.22474
TSPYL1__chr6	5.05783	5.17334	5.31693	5.18823	5.20904	4.93702	5.46118	5.20398	5.81151	5.38063	6.01757	5.71017
PPP1R18__chr6	6.92033	6.97259	7.01623	7.07719	7.5769	7.6645	7.36095	7.25953	8.0031	7.85515	7.551	8.0321
EMC8__chr16	5.59194	5.45511	5.4105	5.07719	5.47912	5.49814	5.42192	5.36193	5.06549	4.70452	4.577	4.8097
ARF6__chr14	6.67979	6.72492	6.70854	6.66216	6.32125	6.32821	6.37644	6.40924	6.04834	6.27372	5.76964	5.76079
TMEM2__chr9	6.15736	6.0323	6.0964	5.98793	5.47912	5.85178	5.89306	6.00963	5.24673	5.41936	5.22908	5.22474
TXNRD1__chr12	5.97095	5.84964	5.49838	5.9569	6.72149	6.6645	6.49468	6.84926	5.88416	4.98831	5.577	5.22474
DYNC1LI2__chr16	6.54593	6.4782	7.0208	6.71874	5.794	5.8007	6.0749	6.19501	6.95332	6.71623	6.81404	6.63073
FZD5__chr2	7.13534	7.02055	5.7723	5.89277	6.24051	5.65014	5.24201	4.9786	5.90335	5.63217	5.22908	4.36224
NFIA__chr1	4.14859	4.3589	5.95064	6.0183	3.87646	2.81364	5.17275	4.75272	3.24673	2.76592	4.35461	4.22474
PCBD1__chr10	7.30082	7.14116	7.01164	7.48862	7.37424	7.14071	7.44658	7.47987	6.4211	6.57328	6.47008	6.15074
MORF4L1__chr15	9.4254	9.43165	9.54595	9.34023	9.12579	9.11873	9.28845	9.14891	9.55203	9.44305	9.52453	9.64428
FAM84A__chr2	3.51896	4.2558	5.16823	4.82566	4.51389	3.76117	4.94245	4.70297	6.24673	6.12347	6.16196	6.6577
IGBP1__chrX	6.3146	5.98473	6.1641	5.8596	6.20904	5.52985	6.34004	6.08601	6.88093	6.73938	6.89893	6.8097
SHOC2__chr10	7.17906	7.05166	7.34455	7.27883	7.37896	7.34168	7.37644	7.34446	7.77897	7.84807	8.17904	7.61706
HNRNPAB__chr5	7.95469	7.93971	7.91177	7.68127	7.794	7.64653	7.7966	7.87944	7.35293	7.41218	7.32423	7.36224
FLNC__chr7	4.98087	5.08588	3.92647	3.43334	5.80807	6.31917	4.95626	4.87008	4.84498	4.08785	3.76964	3.48778
ZNF471__chr19	2.25047	3.14477	3.54991	3.0183	3.2915	3.3986	3.88587	4.17993	4.05408	5.25777	7.09157	5.85701
PROM1__chr4	4.34563	4.28228	4.62391	5.0183	3.92893	3.52985	3.7966	4.07953	2.46912	2.64039	3.76964	3.22474
LMTK3__chr19	3.0005	2.40781	3.47191	2.43334	3.2915	2.17621	3.04937	2.64267	4.92229	5.35088	4.577	4.22474
ITPRIPL2__chr16	3.64902	3.85847	3.27161	4.0183	3.87646	4.32821	2.9969	3.6945	3.12119	2.76592	1.76964	2.48778
GLI3__chr7	6.15299	6.08588	6.85657	6.89277	5.794	5.3986	5.9969	6.12746	4.83169	4.59035	3.76964	4.36224
LOC100288637__chr15	4.23399	5.11563	4.82554	5.0183	3.64513	4.13557	4.28641	3.88503	2.53623	2.93585	1.76964	0.902813
SHQ1__chr3	5.64279	5.61986	5.62991	5.64279	4.97955	5.29169	5.43184	5.50428	4.74923	4.65669	5.09157	4.60325
ATP6V0E1__chr5	6.42404	6.56701	6.5372	6.36408	7.37424	7.14071	6.82697	7.01133	6.63522	6.40013	6.47008	6.26036
METTL7A__chr12	5.69793	5.94386	6.85144	6.34023	5.12157	4.96048	6.02337	5.79291	4.18533	4.08785	4.577	5.54667
NPTXR__chr22	5.8838	6.01662	6.11362	5.43334	5.16597	5.52985	5.60833	5.50428	6.95638	6.94251	6.47008	7.07274
NCOR1__chr17	5.8838	6.14477	6.22084	5.92519	5.91599	5.83918	6.12465	5.85117	6.21635	6.22535	6.577	6.29513
ZNF207__chr17	6.76832	6.85847	6.79917	6.84273	6.97332	6.84549	6.7966	6.83778	6.51559	6.47098	6.01757	6.29513
UBE2T__chr1	6.71288	6.63534	6.65366	6.56262	6.28144	6.16616	6.43184	6.5067	5.71343	5.70452	5.09157	5.8097
NPM1__chr5	8.77404	8.62891	8.24547	8.53137	8.74911	8.67694	8.64715	8.55249	7.93167	8.06054	8.07343	7.71017
HNRNPK__chr9	9.33456	9.21774	9.35726	9.5208	9.18362	9.25065	9.35445	9.40081	8.95178	9.02174	8.83573	9.06268
S100A6__chr1	3.37601	2.89323	3.82554	4.60326	3.02846	3.25421	3.45146	4.15548	1.39873	1.18096	2.76964	1.90281
DIP2C__chr10	4.0005	4.28228	4.79383	4.34023	3.70654	4.52985	4.95626	4.36193	5.18533	5.58184	5.35461	5.42637
NAP1L3__chrX	5.80785	5.53434	6.3788	6.29132	6.00422	6.09375	6.09376	6.11484	7.18009	7.06054	6.89893	7.18821
SLC22A17__chr14	6.98087	6.6042	7.33724	7.14758	6.60539	6.12523	6.94245	6.61827	7.64666	7.31795	7.38435	7.48778
CYYR1__chr21	4.47754	4.60944	3.00242	3.60326	3.97955	3.59125	3.09999	2.60704	2.72066	3.03894	1.76964	0.902813
PNP__chr14	4.18336	4.08588	3.76141	3.89277	4.2915	4.36384	4.09999	3.79291	3.43435	2.70452	2.76964	3.22474
UNC79__chr14	2.18336	2.20136	3.78311	3.89277	2.581	2.00629	3.7966	3.45504	4.67671	5.09982	4.76964	5.90281
GLIPR1__chr12	2.3146	2.40781	1.52437	2.43334	5.14394	5.48202	3.85672	4.01303	4.34359	3.67281	3.35461	2.48778
TIMP2__chr17	7.20467	7.03619	7.41399	7.13378	7.59731	7.40289	7.66197	7.59118	7.72965	7.76027	7.67654	7.60325
SOX21__chr13	4.39096	4.33381	4.31693	4.60326	4.16597	3.70673	4.58186	4.26239	3.20608	2.42889	1.76964	1.90281
PALLD__chr4	7.06717	6.9807	6.78041	6.80838	7.40698	7.64291	6.98348	7.53896	6.43435	6.45242	6.52453	6.11227
MBNL3__chrX	3.72178	3.45511	3.54991	4.24069	3.2915	2.81364	3.48994	3.01303	0.0768006	1.35088	1.76964	1.90281
TMCO1__chr1	5.4349	5.4896	5.2484	5.64279	5.90293	5.96048	5.70144	5.76893	5.43435	5.0636	4.76964	5.22474
GATC__chr12	5.81895	5.4782	4.79383	5.13378	5.61343	5.38133	5.02337	5.42467	5.05408	4.92243	4.35461	4.36224
DTX4__chr11	6.33794	6.13027	5.99314	5.5208	4.87646	4.46572	4.74981	4.83201	5.23667	5.1117	5.577	5.36224
RCBTB2__chr13	4.86786	4.92718	4.88694	5.0183	4.16597	3.65014	4.26438	4.1306	4.0768	4.15824	3.76964	4.07274
APLP2__chr11	8.86719	8.68331	8.43641	9.00699	8.97332	8.9488	8.70554	9.06934	8.47126	8.46982	8.1272	8.22474
ABCF3__chr3	3.92033	3.96035	3.8463	4.13378	4.25086	4.00629	4.24201	4.15548	3.28625	3.67281	3.35461	3.48778
RAB2B__chr14	6.67979	6.52328	6.99081	7.04805	6.88312	6.99497	7.29186	7.11166	7.57665	7.70059	7.577	7.53217
FUBP1__chr1	6.17475	6.29533	6.26391	6.43334	6.68382	6.48202	6.65986	6.48233	6.0768	5.97537	5.76964	5.94721
SCAMP1__chr5	5.13089	5.21516	5.36807	5.47773	5.35039	5.00629	5.29729	5.16776	5.97162	6.14674	5.76964	6.29513
ACOT9__chrX	3.98087	3.85847	3.73939	3.24069	4.02846	4.46572	4.5088	3.94333	2.83169	2.26842	2.76964	2.90281
RPL19__chr17	9.15791	9.2633	8.95363	9.15444	9.47141	9.48809	9.34923	9.29913	8.90017	9.04669	8.95947	9.06772
SRPR__chr11	5.24225	5.00871	4.89693	4.9569	5.20904	5.11481	4.81187	5.24512	4.48619	4.26842	3.35461	4.36224
BLCAP__chr20	6.07181	5.99277	6.12641	5.79089	5.75093	5.9011	6.1062	5.74455	6.7979	7.02331	7.1272	6.11227
TMEM98__chr17	7.48453	7.55348	7.10503	7.0183	7.13838	6.91318	7.16682	7.00963	6.51974	6.32051	5.93957	6.42637
CCNF__chr16	4.96097	4.69074	4.19275	4.68127	4.87646	3.96048	3.88587	4.09247	3.80472	3.79567	3.35461	3.71017
LINC00617__chr14	2.03897	2.58838	2.41746	3.24069	2.2915	2.32821	2.9969	3.82427	3.12119	3.53851	4.09157	4.22474
RHOC__chr1	6.35329	6.23563	5.89693	5.89277	6.83582	6.88893	6.35575	6.63605	5.63139	5.70452	5.09157	4.22474
ORC3__chr6	5.55259	5.57773	5.4105	5.56262	5.38836	5.38133	5.52741	5.35658	4.93478	5.01385	4.93957	4.48778
ST6GAL2__chr2	3.46347	2.67084	4.8463	4.60326	3.70654	2.91318	4.3081	4.09247	4.84498	4.98831	5.577	5.94721
NDUFB5__chr3	5.52575	5.4896	5.3965	5.68127	5.61343	5.87665	5.80425	5.7322	5.22655	5.32051	5.09157	5.07274
MKRN1__chr7	7.13089	6.8716	7.02536	7.37585	7.14948	6.87665	7.16979	6.92174	7.85488	7.83201	7.551	8.06268
FOXG1__chr14	8.90087	8.88354	8.88444	8.64279	8.27892	8.00064	8.41818	8.27734	8.80982	8.87966	8.78087	8.63752
TRPS1__chr8	4.73356	4.50092	4.51143	5.0183	3.76543	3.52985	3.70144	3.85497	3.93478	4.0636	4.09157	3.71017
PLCL2__chr3	2.11297	2.30827	3.36087	3.0183	1.70654	2.91318	3.1489	2.95754	4.00754	4.13515	4.577	3.90281
USP24__chr1	3.40575	3.6302	3.17645	3.43334	2.82201	2.91318	2.88587	2.77697	3.90969	3.50289	3.76964	4.07274
GPC2__chr7	6.40943	6.33381	7.15373	6.71874	6.05231	5.67871	6.94591	7.05164	7.80812	7.81939	7.93957	7.90281
BEND5__chr1	4.26678	4.22884	4.79383	4.24069	3.87646	3.59125	4.45146	4.32951	5.53623	5.75839	5.577	5.07274
VCAM1__chr1	5.86251	5.28228	5.52437	5.13378	4.3695	4.17621	4.56394	4.07953	2.66176	3.39041	3.35461	0.902813
NUP93__chr16	5.47754	5.33381	5.58738	5.47773	5.40698	4.98357	5.5088	5.52352	5.99566	6.04514	5.93957	6.0321
SUCLG2__chr3	4.72178	4.60944	4.5372	4.5208	4.3695	4.17621	4.66828	4.49457	2.66176	2.57328	3.76964	1.90281
GMNN__chr6	6.56583	6.71037	5.99314	6.45571	5.96706	6.21574	5.81187	5.71974	4.83169	4.97537	3.35461	5.15074
KDELR1__chr19	7.41492	7.2757	6.7723	7.36408	7.41619	7.4575	6.90022	7.31578	7.16956	6.95904	6.52453	7.13163
RAB3D__chr19	3.69793	4.14477	4.33173	4.13378	4.07577	4.13557	4.32947	4.1306	4.99566	5.00114	4.93957	4.60325
MAN1A2__chr1	2.25047	1.82284	2.92647	2.75527	2.92893	2.91318	2.76557	2.87008	3.50307	3.93585	4.09157	4.07274
NLN__chr5	7.17475	7.16269	6.74216	6.89277	6.73628	6.78765	6.40692	6.55891	6.77724	6.72012	6.62763	6.68417
TCF19__chr6	6.54927	6.59367	6.73104	6.26623	5.33103	5.65014	6.05579	5.85497	5.09917	5.21438	5.09157	5.6577
ERC2__chr3	1.69793	2.40781	2.88694	3.0183	1.92893	1.81364	2.24201	2.89982	3.90969	4.1117	4.35461	3.71017
SIX5__chr19	6.34946	6.3147	5.55622	5.34023	5.66073	5.32821	5.38156	5.12432	4.60036	4.46636	2.76964	3.90281
PFAS__chr17	4.82447	4.74884	4.15996	4.34023	4.2915	4.3986	4.47083	4.5425	3.56865	3.57328	2.76964	2.48778
APH1B__chr15	5.20043	4.97665	5.38235	4.82566	4.47912	4.13557	4.17275	4.09247	4.3622	4.22535	4.93957	4.22474
GLS__chr2	4.63653	4.2558	4.51143	4.60326	4.82201	4.59125	4.84192	4.71138	4.97162	4.70452	4.76964	4.90281
DNM1__chr9	5.53251	5.14477	5.36087	4.89277	4.87646	4.73421	4.5088	4.61603	6.52388	6.37572	5.47008	6.57524
DOK5__chr20	7.16173	6.948	7.41919	7.82566	6.35039	5.97207	7.19038	7.8616	5.65423	5.72012	5.76964	6.51752
MYT1L__chr2	0.598398	0.500916	3.71702	3.43334	1.70654	0.591249	2.9969	2.32951	4.69151	4.76592	5.22908	5.60325
PDLIM3__chr4	3.34563	3.2558	3.30198	3.24069	2.70654	2.59125	2.70144	2.71138	2.32473	1.8814	1.76964	0.902813
BEX1__chrX	8.60001	8.54258	8.89319	8.94113	8.9592	8.92813	9.31883	9.16163	9.42829	9.37387	9.2615	9.72299
LIN7A__chr12	1.5984	1.82284	1.62391	0.433339	2.12157	3.09375	3.19621	2.32951	0.661763	1.50289	1.76964	0.902813
PRDM16__chr1	5.29884	5.21516	5.71137	5.38754	4.4435	4.621	4.68495	4.28511	4.12119	3.64039	2.76964	3.22474
BCL7A__chr12	6.66141	6.68579	6.97676	6.8596	6.35998	5.99497	6.88947	6.7322	7.02517	7.01701	7.35461	7.41061
VASH2__chr1	2.49148	2.67084	3.27161	4.0183	1.70654	2.91318	2.94245	2.89982	4.67671	4.85338	4.09157	5.48778
FANCG__chr9	5.13977	4.87596	4.85657	4.60326	4.2915	4.17621	4.35054	4.21585	4.60036	4.40978	4.76964	4.48778
PRR11__chr17	5.83544	6.32746	6.6329	6.24069	5.80807	5.70673	5.4994	5.57052	5.031	5.12347	4.577	4.36224
WBSCR22__chr7	3.83544	3.99277	4.20887	4.24069	4.20904	4.621	4.39176	4.76893	3.90969	4.13515	4.09157	4.36224
TMEM258__chr11	8.38537	8.32905	8.08661	8.1407	8.34799	8.15349	8.2616	8.37655	7.95791	7.89004	7.67654	7.88009
NPPB__chr1	1.37601	2.08588	1.30198	1.43334	6.09885	6.65734	3.52741	4.36193	4.39873	3.79567	3.76964	2.90281
FAM49A__chr2	3.89957	3.58838	4.91669	5.43334	4.2915	3.17621	4.71774	4.87757	6.00754	6.0697	6.62763	6.11227
LPIN1__chr2	5.18336	5.11563	5.62391	5.18823	5.2301	5.49814	5.31883	5.30748	5.90969	5.97537	6.01757	5.76079
ARAF__chrX	4.86786	4.56701	4.56251	4.34023	4.61343	4.46572	4.48994	4.58889	4.24673	3.85338	3.35461	3.48778
DYNLRB1__chr20	10.2889	10.2769	10.0013	9.99558	10.2183	10.2871	9.97672	10.2969	10.6218	10.6452	10.2774	10.5157
BRIX1__chr5	4.73356	4.89323	4.43126	4.89277	4.67616	5.07238	5.0875	5.10529	4.16426	4.08785	4.09157	3.90281
GRPEL1__chr4	5.29089	4.87596	4.82554	5.0183	5.90293	5.76117	5.36095	5.71557	4.5846	5.01385	4.35461	4.07274
ODF2L__chr1	3.11297	2.89323	3.38944	4.24069	2.92893	3.00629	4.02337	3.72806	4.12119	5.26842	6.35461	5.54667
HERPUD1__chr16	3.74524	3.67084	4.07457	3.89277	4.73628	4.73421	4.61705	5.03331	4.55253	4.53851	4.93957	4.36224
CCDC47__chr17	5.11297	5.30827	5.15996	5.24069	5.05231	5.02865	4.94245	5.16163	4.55253	4.52081	3.76964	4.48778
ZNF148__chr3	4.0005	3.99277	4.37523	4.13378	3.92893	3.76117	3.91444	3.92897	4.22655	4.42889	4.577	4.71017
KCNQ1OT1__chr11	6.27486	6.28882	7.21686	7.89277	6.62937	7.18121	7.8382	7.84162	7.79448	9.3012	11.3788	10.1364
MMP24__chr20	3.85713	3.58838	3.17645	2.0183	4.20904	4.05068	3.76557	3.89982	5.92229	5.31024	4.76964	5.54667
AK2__chr1	6.04371	6.07834	5.89693	6.29132	6.17686	6.17621	6.14288	6.32677	5.31521	5.45708	4.35461	5.29513
CAMKK2__chr12	6.08106	5.6302	6.12216	5.68127	6.11026	5.6062	6.0102	5.6945	6.73501	6.21988	6.76964	7.0321
CLEC16A__chr16	3.14859	2.82284	3.36087	3.75527	2.4435	3.00629	3.24201	3.32951	4.28625	3.73555	4.09157	4.90281
PSENEN__chr19	6.70692	6.91454	6.75044	6.66216	7.04044	7.03419	7.05258	7.12589	6.70251	6.71623	6.72384	6.51752
SH3BP4__chr2	7.89171	7.88462	7.73522	7.75527	7.83582	7.82965	7.88045	7.98988	7.44967	7.45242	7.09157	7.01134
ARMCX2__chrX	6.14859	6.13754	6.15996	5.98793	6.3695	6.35501	6.24764	6.24801	5.80472	5.59035	5.09157	5.60325
TMEM109__chr11	5.81895	5.79554	4.81505	4.82566	5.4435	5.9011	4.9969	5.0533	4.70616	4.40978	2.76964	3.90281
NAV3__chr12	2.25047	2.30827	3.575	3.24069	0.121573	1.59125	3.32947	2.77697	3.93478	4.03894	4.76964	4.99028
SLC9A6__chrX	4.63653	4.82284	4.96495	4.89277	4.67616	4.13557	4.91444	4.5425	5.45184	5.56466	5.47008	5.8097
HNRNPF__chr10	6.92547	6.82735	6.66538	6.73712	6.77262	6.43255	6.55035	6.59118	6.02517	6.16395	6.29321	6.15074
PPAP2B__chr1	4.09482	3.67084	4.5372	4.75527	3.20904	3.00629	3.45146	3.57052	1.0768	1.98831	2.76964	3.22474
CLSTN3__chr12	3.34563	3.14477	3.8463	3.75527	2.92893	3.17621	4.24201	4.09247	4.89698	5.32051	5.47008	4.71017
BMP4__chr14	4.5984	4.38356	2.67121	2.75527	3.92893	3.17621	1.41194	1.87008	3.72066	3.67281	1.76964	2.48778
ACTL6B__chr7	3.21731	3.20136	5.0208	4.89277	4.02846	3.91318	5.19621	5.01982	6.60818	6.61141	6.93957	6.07274
BEND7__chr10	2.5984	2.30827	2.52437	2.43334	1.70654	1.32821	1.82697	2.4144	3.12119	2.50289	2.76964	3.22474
SERPINB6__chr6	5.87851	5.7583	5.84114	5.75527	5.53096	5.82647	5.92149	5.93617	5.0768	4.22535	4.577	3.90281
EPB41L4A-AS1__chr5	6.10846	6.07077	6.03443	6.16126	5.62937	5.88893	6.14288	5.90717	6.60818	6.76592	6.47008	6.60325
NOP56__chr20	6.16173	6.2757	6.15165	6.26623	6.2915	6.31917	6.6808	6.67098	5.44312	5.54728	5.76964	6.15074
POLA2__chr11	2.92033	3.30827	2.92647	2.75527	2.581	2.32821	2.70144	2.60704	1.0768	0.988313	1.76964	1.90281
KLF12__chr13	5.09482	4.65066	5.61184	5.5208	5.02846	4.32821	5.3081	5.04667	5.98369	6.12933	6.01757	6.42637
HAUS8__chr19	3.03897	2.89323	3.88694	3.0183	3.20904	2.32821	3.19621	3.04	2.24673	1.35088	1.76964	0.902813
C11orf95__chr11	5.77973	5.84077	6.3788	5.89277	5.59731	5.48202	6.2307	6.04	6.98669	6.87793	6.72384	7.05256
TMSB10__chr2	10.5156	10.6449	10.7657	10.5919	10.8885	10.9488	10.7266	10.8884	11.2032	11.1277	11.477	11.5583
ST6GALNAC5__chr1	5.37601	5.40781	6.0299	5.98793	4.33103	4.46572	5.58186	5.3404	4.98369	4.72012	5.76964	5.42637
SGOL2__chr2	3.5984	3.14477	3.30198	3.89277	3.2915	3.25421	3.48994	3.04	2.24673	2.26842	1.76964	2.48778
SOS1__chr2	4.85713	4.40781	4.80448	4.60326	4.40698	3.65014	4.7966	4.46502	5.15362	4.85338	5.85711	5.71017
SAPCD2__chr9	4.47754	4.74884	4.575	4.13378	4.20904	4.25421	4.3081	4.22763	3.20608	3.57328	3.76964	3.71017
PLEKHG2__chr19	4.80227	4.72973	5.00242	5.07719	4.12157	3.76117	4.47083	4.92174	4.98369	5.35088	5.47008	5.60325
SERF2__chr15	10.3578	10.4257	10.1322	9.9783	10.523	10.4529	10.4603	10.2359	9.94909	9.90419	9.94457	9.90281
UNC13A__chr19	3.14859	3.02448	3.41746	3.89277	2.2915	3.00629	3.85672	3.72806	5.20608	5.13515	4.577	5.6577
ATF3__chr1	4.94079	4.50092	3.44494	3.75527	6.20904	6.50613	4.0749	4.61603	4.66176	4.44775	2.76964	3.71017
SLU7__chr5	4.58546	4.54531	4.65953	4.60326	4.97955	4.52985	4.66828	4.65144	5.06549	5.05132	5.22908	5.15074
RPAIN__chr17	5.75104	5.52328	5.78848	6.07719	5.82201	5.46572	6.32416	6.15239	6.41665	6.30508	6.76964	6.51752
DOK6__chr18	1.96097	2.20136	3.03895	3.89277	1.70654	1.59125	1.94245	2.8397	2.98369	3.42889	4.09157	3.90281
EMP3__chr19	3.83544	4.22884	3.36087	3.60326	4.794	4.49814	3.04937	3.58889	3.39873	3.18096	1.76964	1.90281
ZFHX3__chr16	5.52575	5.61986	6.68568	6.66216	5.62937	5.46572	6.3081	6.24222	8.09361	8.31282	7.577	7.85701
PPP2CA__chr5	7.47754	7.37436	7.39297	7.27883	7.60941	7.49413	7.32682	7.35389	7.37601	7.26044	7.19591	7.13163
NUP205__chr7	5.14859	4.87596	5.10072	5.43334	4.51389	4.56088	4.58186	4.68599	4.5846	4.13515	4.09157	4.07274
DHCR24__chr1	6.59194	6.86286	6.61486	6.77319	7.30645	7.17621	7.00356	7.32951	6.58063	6.49837	6.577	6.92518
CNTNAP1__chr17	1.37601	1.96035	1.80448	1.43334	2.2915	2.59125	2.94245	2.8397	3.24673	2.64039	3.35461	3.71017
BPTF__chr17	5.41309	5.59895	5.55622	5.8596	5.12157	5.15603	5.58186	5.1306	5.98369	6.0636	6.01757	6.07274
FAM101B__chr17	5.33794	4.82284	4.62391	4.82566	5.53096	5.09375	4.88587	5.22175	4.12119	3.57328	1.76964	3.48778
LOC100506421__chr2	6.77118	6.84077	7.20887	7.27883	6.49661	6.22546	7.0102	6.78496	6.0768	5.84629	5.76964	6.32908
GSK3A__chr19	7.58546	7.60158	7.85912	7.47773	7.40234	7.38133	7.60176	7.53304	7.97767	7.78087	8.10949	8.18821
SNRPC__chr6	7.02226	7.25246	7.14328	7.03325	7.35519	7.30549	7.35575	7.15394	6.58855	6.70059	6.67654	6.90281
USP34__chr2	5.46347	5.50092	5.54991	5.13378	4.794	4.76117	5.16087	4.88503	5.63904	5.77342	5.67654	5.94721
ARGLU1__chr13	6.09938	6.24911	6.32435	5.9569	5.2301	5.48202	5.44168	5.48479	5.77029	5.71234	5.85711	6.11227
IGFBP3__chr7	1.96097	2.20136	2.17645	2.0183	4.97955	5.00629	3.85672	4.22763	4.87122	3.42889	2.76964	3.22474
TMEM242__chr6	3.21731	3.40781	3.49838	3.60326	3.92893	4.25421	4.12465	3.99936	3.24673	3.60722	3.76964	3.90281
MAPK8IP2__chr22	4.13089	4.0555	4.36087	3.75527	4.02846	3.70673	4.61705	4.63384	5.28625	5.39041	5.67654	5.07274
JAM2__chr21	5.42767	5.53434	5.16823	5.13378	5.25086	5.07238	5.48042	5.21585	4.38058	4.33071	3.35461	3.22474
PGAM1__chr10	5.66141	5.38356	5.45173	5.18823	5.794	5.92515	5.64289	5.62496	4.88416	5.14674	4.09157	4.48778
CADM3__chr1	3.14859	3.54531	4.25618	3.60326	3.3695	2.17621	3.37129	3.192	5.42553	5.16964	4.76964	5.42637
PTMS__chr12	8.09368	8.08776	7.98029	7.98793	7.96078	8.22303	8.09688	7.97336	8.36451	8.34587	8.38435	8.28652
ZNF74__chr22	4.0005	3.85847	3.90684	3.89277	3.51389	3.59125	3.91444	3.97161	4.66176	4.75081	5.09157	4.36224
LINC00086__chrX	2.49148	2.20136	2.24058	1.43334	2.70654	2.17621	3.32947	2.37258	3.39873	3.79567	4.09157	3.71017
STX1A__chr7	2.11297	2.82284	2.8463	3.0183	2.581	2.59125	2.63433	2.53304	4.22655	4.24705	4.09157	3.48778
CHP1__chr15	6.93825	7.08212	6.88694	6.98793	6.86977	7.00629	6.83447	6.909	6.46482	6.56034	6.72384	6.42637
HNRNPH1__chr5	8.75683	8.81266	8.76959	8.60826	8.30148	8.37479	8.54693	8.48663	8.23667	8.2403	8.14468	8.33744
PCLO__chr7	2.54593	2.40781	2.71702	4.0183	1.92893	3.32821	3.59956	3.23931	4.66176	4.97537	5.47008	5.07274
PHF20__chr20	5.81341	5.54531	5.82031	5.82566	5.67616	5.73421	5.78117	5.71138	6.04258	6.36087	6.29321	6.22474
DESI2__chr1	3.89957	3.96035	4.14328	4.0183	3.97955	4.25421	4.45146	3.79291	3.53623	3.53851	3.76964	3.22474
RPS9__chr19	8.70019	8.75594	8.38679	8.42202	8.95604	8.91768	8.85211	8.85497	8.43655	8.56142	8.51111	8.36224
FABP5__chr8	7.32632	7.16625	7.22283	7.42202	7.32614	7.67162	7.44903	7.31578	6.48194	6.20333	6.35461	6.90281
ECT2__chr3	4.66141	4.65066	4.15996	4.0183	4.3695	4.05068	4.09999	4.04	3.3622	2.76592	3.35461	1.90281
EIF4E2__chr2	5.26678	5.0555	4.83596	4.5208	5.62937	5.6645	5.34004	5.23348	4.5846	4.13515	4.09157	4.60325
TKT__chr3	6.33407	5.87596	5.63588	5.38754	6.98576	6.65014	6.87137	7.11484	6.19054	6.02645	5.76964	6.0321
TMEM123__chr11	6.78822	6.6302	6.67991	6.87628	6.88976	6.8007	7.20491	7.09086	6.11572	6.12933	6.52453	5.90281
MAPRE1__chr20	9.18658	9.04781	8.81637	8.79089	9.60539	9.2035	9.18453	9.09769	9.30562	9.19568	9.01757	8.96351
PTGES3__chr12	8.3097	8.39422	7.99547	8.27254	8.39537	8.62834	8.3	8.30748	7.81489	7.85161	7.93957	7.6577
BRD8__chr5	6.45993	6.22202	6.6209	6.54186	5.83582	5.85178	5.9969	5.87008	6.06549	6.12347	5.93957	6.15074
RFPL1-AS1__chr22	-0.623995	0.822844	2.24058	0.433339	-0.878427	0.00628651	1.24201	0.870077	2.0768	3.03894	2.76964	2.90281
RRAS2__chr11	5.25047	5.2558	4.9838	5.13378	5.77978	5.70673	5.48994	5.51393	5.34359	5.24705	4.577	4.71017
RPL41__chr12	13.2584	13.1404	12.8663	13.1066	13.387	13.1393	13.0978	13.1991	12.5042	12.4945	12.7318	12.6248
KCNH2__chr7	3.34563	3.89323	3.52437	2.43334	3.02846	2.91318	3.28641	3.09247	4.87122	4.75081	4.577	4.8097
CEP170__chr1	5.49148	5.38356	6.13487	6.10576	5.96706	5.65014	5.96311	5.87383	6.90017	6.89863	6.577	7.27785
CCDC14__chr3	5.17475	4.87596	5.47857	5.5208	4.3695	4.29169	4.78117	4.598	4.39873	4.75081	4.76964	4.60325
EPS8__chr12	3.89957	3.96035	3.8463	3.43334	3.20904	3.3986	3.59956	3.57052	2.83169	2.50289	1.76964	1.90281
PLEKHM3__chr2	3.54593	3.08588	3.64775	3.24069	3.02846	3.25421	3.09999	3.06647	4.24673	4.48474	4.76964	3.71017
RNASEH2C__chr11	5.55923	5.69074	5.32435	5.38754	5.3695	4.93702	4.76557	5.0533	4.81827	4.35088	4.35461	4.90281
QARS__chr3	6.87319	7.2757	6.49838	6.8596	6.17686	6.11481	5.9902	6.15856	6.84829	6.92243	6.29321	6.42637
TMEM97__chr17	9.26068	9.69198	8.72404	8.63301	9.02846	9.3237	8.70451	8.47617	8.31521	8.43717	8.07343	8.20659
AP2B1__chr17	5.53251	5.08588	5.44494	5.43334	5.96706	5.9011	6.49468	6.20099	6.09917	6.1117	6.01757	6.0321
AUP1__chr2	7.70841	7.83854	7.92647	7.83422	7.72149	7.94292	7.86406	7.83586	7.52388	7.40737	7.2615	7.20659
MDC1__chr6	5.11297	4.91031	4.78311	4.82566	4.61343	4.67871	4.81187	4.58889	4.26663	4.22535	4.35461	3.71017
GEMIN8__chrX	3.94079	3.78632	4.03895	4.34023	3.2915	3.32821	3.24201	3.37258	3.77724	4.31024	4.09157	4.07274
PRIM1__chr12	3.64902	3.50092	3.575	3.24069	2.82201	3.25421	2.9969	3.06647	2.53623	2.18096	1.76964	2.48778
ARHGAP17__chr16	6.03422	6.11563	5.98848	5.56262	5.62937	5.46572	4.98348	5.2738	5.4605	5.1117	4.577	4.36224
THUMPD3__chr3	5.09482	4.89323	5.19275	5.07719	4.76543	4.78765	5.03643	4.95045	4.73501	4.556	4.577	4.60325
MT-CO3__chrM	14.8216	14.7929	14.6825	14.6748	14.3966	14.6013	14.0287	14.1899	14.5445	14.4679	14.2398	14.2222
UBE2L6__chr11	6.48801	6.41381	6.4918	6.07719	6.2301	5.81364	6.52741	6.23931	6.97162	6.83917	7.19591	6.76079
SEPT6__chrX	6.21311	6.26247	6.78311	6.71874	6.24051	5.91318	6.42192	6.08601	7.77724	7.80301	7.1272	7.6577
NT5C2__chr10	6.81341	6.70059	6.6683	6.56262	7.04639	6.9488	6.95969	7.12116	7.11297	6.96886	7.05505	6.92518
SMAP2__chr1	5.3146	5.08588	5.38944	4.9569	5.54784	5.00629	5.90022	5.40406	6.25173	6.13515	6.16196	6.57524
RNF146__chr6	4.79104	4.94386	5.4105	5.0183	4.61343	4.49814	4.85672	4.84736	5.57665	5.44775	5.67654	5.22474
TOX2__chr20	5.25865	5.0555	3.96495	3.0183	4.84949	4.56088	3.91444	3.37258	5.96554	5.67281	5.22908	4.99028
CLSPN__chr1	4.73356	4.69074	4.51143	4.24069	4.4435	3.70673	4.45146	4.21585	3.0768	3.22535	3.35461	3.48778
HECW1__chr7	0.112971	1.30827	1.41746	1.43334	-0.878427	0.591249	1.41194	1.80868	3.0768	2.82481	3.35461	3.22474
RIT1__chr1	6.10393	5.97665	6.17645	5.71874	6.67616	6.50613	6.69322	6.77496	5.83835	5.93585	5.35461	5.48778
DDA1__chr19	6.08106	5.87596	5.82031	5.29132	6.81506	7.02865	6.31347	6.63826	6.66926	6.56898	6.35461	6.51752
KIFC1__chr6	4.76832	4.38356	4.51143	4.34023	3.70654	4.21574	3.9969	4.30748	3.28625	2.57328	1.76964	2.90281
RAP1GAP2__chr17	3.79104	4.02448	3.76141	4.68127	4.2915	4.65014	3.19621	3.37258	5.916	5.91567	5.35461	5.90281
RPAP2__chr1	4.11297	4.3589	3.07457	3.24069	4.02846	4.17621	3.37129	3.72806	2.66176	3.70452	1.76964	2.48778
ARHGEF9__chrX	4.07644	3.6302	4.24058	4.0183	3.97955	3.86427	4.32947	4.06647	4.56865	5.13515	5.09157	5.54667
WEE1__chr11	6.74524	6.68083	6.7723	6.82566	7.14948	7.11481	6.49468	6.64047	6.22146	5.64039	5.47008	4.90281
TYRO3__chr15	5.16608	4.89323	4.63588	4.24069	4.581	4.3986	3.7966	4.29634	3.39873	3.85338	3.35461	2.48778
MSL1__chr17	7.08336	7.03619	7.11362	7.47773	6.57278	6.55318	6.70144	6.48969	6.98969	7.26044	7.29321	7.18821
SLC8A2__chr19	3.37601	3.02448	3.9838	2.0183	3.87646	2.70673	4.70144	3.89982	6.16956	6.08785	5.67654	6.22474
EBPL__chr13	5.01021	4.60944	4.28687	4.5208	4.67616	4.78765	4.5088	4.51393	4.3622	4.18096	3.76964	4.07274
RDH10__chr8	3.74524	3.3589	4.12641	3.75527	2.581	3.17621	2.9969	2.89982	2.46912	2.26842	2.76964	2.90281
MYH10__chr17	7.94206	8.10269	7.85144	7.94904	8.35998	8.19611	8.39176	8.71922	7.51559	7.77155	7.1272	7.64428
PRRT2__chr16	2.69793	2.74884	3.80448	2.75527	2.2915	2.91318	2.24201	2.57052	4.18533	4.35088	5.577	4.07274
RFX4__chr12	2.3146	2.30827	3.92647	4.75527	1.70654	2.00629	3.63433	3.5519	0.884156	1.35088	1.76964	2.90281
LOC100131257__chr7	5.07644	5.13027	5.85144	6.43334	4.90293	5.07238	5.96993	6.2188	6.15362	7.52525	9.68851	8.55386
SAE1__chr19	6.17475	6.00871	5.85657	5.60326	5.99194	6.06157	5.81187	6.15856	5.41665	5.46636	4.76964	5.07274
MTSS1L__chr16	4.97095	4.91031	4.99314	5.18823	4.3695	4.49814	4.41194	4.75272	5.26663	4.90888	5.22908	5.07274
TRIM28__chr19	9.54802	9.54736	8.86486	8.76426	9.29899	9.26485	8.98348	9.12156	8.83752	8.78736	8.36956	8.32908
TTC17__chr11	5.18336	5.0555	5.64183	5.29132	4.70654	4.52985	4.81187	4.8165	5.25671	5.03894	6.09157	5.60325
PLEKHA1__chr10	3.54593	3.30827	3.03895	3.24069	3.02846	2.91318	2.94245	2.89982	4.12119	3.98831	3.35461	3.48778
DPH5__chr1	6.5984	6.2757	6.15165	6.36408	6.20904	6.13557	6.05579	6.25378	5.93478	5.80301	5.09157	5.60325
CINP__chr14	5.21731	5.10083	5.36087	5.07719	5.56452	5.96048	5.52741	5.70297	4.90969	4.39041	4.09157	4.60325
ATP1B3__chr3	8.01866	7.96035	7.57033	7.70013	8.42078	8.43255	7.90557	7.92536	7.59053	7.52081	7.60253	7.29513
CAMK2N1__chr1	5.21731	5.59895	6.50492	6.94113	5.09885	5.32821	6.29729	5.8397	6.90017	7.00433	7.1272	7.50273
FAM220A__chr7	3.94079	4.17334	4.22481	4.34023	3.20904	3.65014	4.43184	3.99936	4.94717	4.90888	4.93957	5.60325
SPOCK1__chr5	4.92033	4.99277	5.33173	4.9569	5.53096	5.44923	5.68495	5.61603	6.01344	5.78087	6.577	5.54667
NCBP2__chr3	7.47929	7.27241	7.38767	7.43334	7.67616	7.60991	7.80043	7.51634	7.24673	7.26044	7.22908	7.27785
APLP1__chr19	9.04548	9.0622	9.22035	9.40201	9.22879	9.00205	9.51872	9.6734	10.84	10.6419	10.1272	10.2691
ARHGEF40__chr14	6.47052	6.4896	6.32435	6.18823	6.17686	5.9488	5.87864	5.92536	5.88416	5.39041	5.22908	4.60325
GPC3__chrX	8.06017	7.73932	6.30573	6.0183	6.77978	6.89503	4.63433	4.82427	5.98969	5.90206	5.22908	4.71017
TP53I11__chr11	7.52406	7.47246	7.70428	7.81704	7.40234	6.78107	7.58186	7.42211	8.10055	8.21025	8.17904	8.19743
AK3__chr9	6.53924	6.56161	6.43126	6.70013	6.71403	6.52985	6.45633	6.42722	6.13208	6.22535	6.01757	5.90281
ILF2__chr1	7.49148	7.56969	7.37701	7.55228	7.38367	7.32821	7.4994	7.49213	7.0339	7.02331	7.05505	7.3122
SNAP91__chr6	2.49148	1.30827	3.96495	1.43334	2.70654	2.17621	3.45146	3.16776	4.87122	5.42889	5.35461	5.71017
ANAPC7__chr12	5.37601	5.4667	5.29445	5.29132	5.53096	5.07238	5.25324	5.37787	4.79105	4.556	4.577	4.99028
FRAT1__chr10	0.598398	0.0858784	1.03895	0.433339	0.706535	-0.993713	1.41194	0.607042	1.88416	1.98831	3.35461	1.90281
C2orf68__chr2	7.54259	7.56969	7.6943	7.84273	6.7582	6.84549	7.2307	7.06483	7.0368	7.23895	6.89893	7.11227
SRSF3__chr6	9.85208	9.82566	9.70357	9.6281	9.50095	9.41991	9.65034	9.54397	9.15895	9.1746	9.37697	9.3122
RGS6__chr14	4.29884	4.38356	5.9838	5.47773	3.581	2.70673	3.48994	3.77697	3.24673	2.64039	2.76964	2.90281
CTTNBP2NL__chr1	5.8838	5.66079	5.78848	5.64279	5.96706	6.19611	5.6514	5.92897	6.46482	6.46173	6.22908	6.29513
ZWINT__chr10	6.17475	5.4782	5.40352	5.98793	5.54784	5.27307	4.7966	5.598	3.60036	4.01385	4.09157	2.90281
ADIPOR1__chr1	5.5984	5.5562	5.82554	5.68127	6.09885	6.19611	6.03643	6.118	5.77029	5.78829	5.93957	5.99028
FIS1__chr7	5.40575	5.32109	5.6828	5.43334	5.61343	5.41568	5.98348	5.87008	5.916	5.72012	6.577	6.54667
ZNF804A__chr2	0.376005	0.822844	1.30198	0.433339	-0.878427	-0.993713	0.826974	0.607042	1.39873	2.35088	2.76964	1.90281
BTRC__chr10	3.83544	3.74884	4.14328	3.24069	3.70654	3.70673	4.09999	3.91447	4.53623	4.31024	4.93957	4.48778
LRWD1__chr7	1.49148	1.30827	1.71702	2.43334	1.4435	0.591249	2.32947	2.32951	2.60036	2.42889	3.35461	3.22474
NCAN__chr19	4.92033	4.60944	6.72545	6.0183	4.40698	4.52985	6.61705	6.27947	7.32947	7.5797	7.52453	8.26913
GABRB2__chr5	1.37601	1.82284	2.52437	2.43334	1.12157	-0.993713	1.70144	2.09247	3.031	3.60722	4.577	4.60325
ZSWIM6__chr5	5.55923	5.4896	6.0208	5.75527	5.75093	5.46572	6.19621	6.28511	6.94099	6.90206	6.72384	6.68417
AXIN2__chr17	2.79104	2.82284	3.67121	3.89277	1.92893	1.81364	2.82697	3.30748	3.24673	3.46636	4.09157	3.71017
DPH2__chr1	3.72178	3.74884	3.82554	3.43334	3.97955	3.81364	3.41194	3.53304	2.24673	2.50289	1.76964	2.90281
GIT2__chr12	6.37601	5.96035	6.44153	6.07719	6.02846	6.23511	6.16087	6.15856	6.82834	6.71623	7.1272	6.60325
PHF2__chr9	5.49148	5.66079	5.75594	5.29132	5.35039	5.09375	5.39176	5.48479	6.39873	6.27899	6.01757	6.4574
DLAT__chr11	5.26678	5.14477	4.7723	5.0183	5.3114	5.05068	4.82697	4.9786	4.79105	4.50289	4.577	4.22474
CAMK2B__chr7	1.49148	0.500916	3.44494	1.43334	1.4435	1.81364	3.63433	2.67743	4.70616	4.50289	4.76964	4.22474
PTRF__chr17	2.79104	2.40781	1.71702	2.75527	4.61343	4.76117	3.1489	4.29634	3.74923	2.57328	2.76964	3.71017
BUB3__chr10	7.0971	6.94386	7.03895	7.11984	7.06409	6.85178	7.07806	6.72598	6.59644	6.58184	6.4135	6.15074
PHLDA3__chr1	4.62393	4.7677	4.4852	3.60326	5.67616	5.56088	5.40188	5.26239	4.66176	4.33071	3.76964	4.22474
FNBP1L__chr1	4.2829	4.20136	4.7723	5.18823	4.3695	4.29169	5.06219	4.8165	5.66176	5.51188	5.35461	6.18821
GPRIN1__chr5	4.77973	4.84077	5.06575	4.60326	4.33103	3.86427	5.17275	4.76893	5.89698	5.64039	5.93957	5.71017
RAB2A__chr8	7.1242	7.06697	7.3076	7.26623	7.2965	7.35501	7.28093	7.33087	7.78588	7.79751	8.29321	7.6577
RANBP1__chr22	6.8327	7.04007	6.4852	5.8596	6.80105	6.71365	6.62139	6.49457	5.95944	5.68875	5.35461	5.54667
CXCL14__chr5	7.54426	7.50092	7.86803	7.90094	6.69143	7.28706	6.0102	5.89982	6.01344	5.40013	4.35461	5.29513
FAM117B__chr2	3.85713	3.92718	4.24058	4.75527	4.07577	3.3986	4.48994	4.20398	5.13208	5.18096	5.09157	5.48778
SEL1L3__chr4	2.74524	2.67084	3.76141	3.75527	4.12157	4.05068	3.96993	4.0533	2.53623	2.08785	2.76964	2.90281
OTX2__chr14	6.60161	6.5562	5.90684	5.9569	6.18766	5.6645	5.5088	5.27947	5.15362	5.40013	3.35461	3.90281
LBR__chr1	6.90998	6.9018	6.96495	7.10576	6.85628	6.92515	6.6127	6.52829	6.41665	6.22535	6.35461	6.22474
KCNMB4__chr12	4.85713	4.84077	5.09206	5.13378	4.73628	4.78765	4.92851	4.70297	5.46912	5.59881	5.35461	5.29513
RNF114__chr20	6.24637	6.34641	5.98848	6.36408	6.4879	6.31917	6.04937	6.22763	5.90969	5.88832	5.35461	5.29513
SERPING1__chr11	4.4204	4.6302	3.33173	3.60326	3.3695	3.91318	2.32947	2.49457	3.43435	3.13515	1.76964	2.90281
TMEM212__chr3	1.87851	3.02448	3.24058	4.34023	2.581	3.17621	3.91444	3.89982	3.46912	5.25777	7.09157	6.29513
OPHN1__chrX	0.598398	1.30827	2.76141	3.0183	-0.878427	0.00628651	-0.757989	-0.129923	0.884156	1.18096	1.76964	2.48778
TMED2__chr12	6.90478	6.65573	6.62991	6.77319	7.2915	7.34168	6.98684	7.23494	6.72426	6.57756	6.76964	6.83355
ATG4C__chr1	5.35329	5.45511	4.90684	5.07719	4.92893	5.09375	5.2078	4.92897	4.43435	4.57328	4.577	4.22474
AGAP1__chr2	4.94079	5.18742	5.51143	5.18823	4.97955	4.78765	5.18453	4.99936	6.05979	6.16395	5.76964	5.76079
G6PC3__chr17	7.60161	7.44928	7.19882	6.73712	7.50528	7.44508	7.32947	7.41954	7.02517	6.77342	6.47008	6.29513
NCK2__chr2	4.98087	5.2558	5.35364	5.29132	5.42535	5.38133	5.77339	5.37787	5.85159	5.83201	6.35461	6.6577
SLC25A37__chr8	2.5984	2.82284	2.76141	3.0183	2.2915	2.81364	2.82697	2.4144	1.98369	1.64039	1.76964	1.90281
CALR__chr19	7.04371	6.99677	6.5812	5.79089	7.24569	7.28706	6.88226	6.84353	6.031	5.60722	5.22908	5.76079
CELF3__chr1	2.83544	3.50092	3.73939	3.89277	3.12157	2.59125	3.9969	3.88503	5.33419	5.36087	5.09157	5.07274
DOK4__chr16	2.03897	0.822844	2.03895	2.43334	2.2915	0.00628651	1.94245	2.28511	3.56865	4.03894	4.09157	4.22474
SPEG__chr2	2.54593	2.08588	3.17645	2.0183	2.2915	1.81364	1.70144	2.28511	3.46912	3.67281	4.09157	4.22474
APMAP__chr20	5.11297	5.30827	5.56877	5.34023	5.82201	5.73421	6.02337	5.8813	5.0768	5.22535	5.35461	5.6577
MTHFD1__chr14	5.55259	5.41978	5.20083	4.89277	5.16597	4.91318	5.13683	5.26239	4.50307	4.15824	4.35461	4.48778
MDFIC__chr7	3.54593	3.78632	3.86676	4.0183	2.92893	2.46572	3.52741	3.53304	2.32473	2.18096	2.76964	1.90281
SARS__chr1	7.10393	6.93137	6.81768	6.87628	7.35039	7.45337	7.5251	7.54956	7.32473	7.39285	7.22908	7.58931
TFAM__chr10	4.76832	4.56701	4.575	4.5208	4.95446	4.76117	4.54579	4.48479	3.83169	4.22535	4.09157	3.90281
TMEM35__chrX	3.92033	3.74884	5.05687	3.43334	3.76543	3.52985	5.25324	5.08601	5.69885	5.82481	6.577	7.13163
KIFAP3__chr1	5.3609	5.04007	5.78311	6.04805	5.84949	5.83918	5.78891	5.5425	7.0397	7.0788	6.577	7.22474
USP33__chr1	6.34179	6.10825	6.19275	6.36408	5.90293	5.63564	6.16087	6.07953	6.42553	6.4893	7.1272	7.09264
TTC9__chr14	3.98087	3.74884	4.44494	4.0183	4.16597	3.76117	4.21929	3.92897	5.15362	5.40013	5.09157	6.18821
TMEM178B__chr7	4.61122	4.22884	4.79383	4.75527	3.12157	3.46572	4.28641	4.40406	5.41665	5.46636	5.09157	6.36224
HSDL2__chr9	5.21731	4.94386	4.94584	5.13378	5.4435	5.41568	5.24201	5.10529	4.43435	3.85338	4.577	4.48778
STC1__chr8	4.44925	5.11563	5.59353	5.07719	4.12157	3.70673	4.63433	3.89982	4.00754	3.76592	4.35461	4.07274
CAP1__chr1	7.89957	7.75358	7.78041	8.01077	8.70841	8.90715	8.17865	8.51634	8.18271	8.00751	7.76964	8.02175
GLTP__chr12	5.92033	6.22884	6.11362	6.0183	5.99194	6.09375	5.83447	5.92897	5.67671	5.84629	5.35461	5.48778
EXOSC5__chr19	4.62393	3.92718	3.96495	4.0183	4.54784	4.43255	4.52741	4.23931	3.46912	3.42889	3.35461	3.71017
MIAT__chr22	7.53924	7.41381	7.3859	7.27883	6.73628	6.56853	7.04937	6.92174	8.5925	8.60617	7.60253	8.47267
ARIH1__chr15	4.93059	5.00871	4.85657	4.89277	4.61343	4.621	5.02337	4.73633	5.29597	5.26842	5.35461	5.22474
SYNGR1__chr22	3.98087	4.58838	4.61184	3.89277	4.33103	4.36384	4.3081	4.3512	5.00754	5.22535	5.22908	5.42637
PAPSS1__chr4	6.40575	6.2558	6.6448	6.84273	6.3695	6.30091	6.37644	6.56588	6.83502	6.98509	6.85711	7.05256
CBX4__chr17	6.7854	6.65066	7.5356	7.17481	6.66073	6.17621	7.17865	7.06975	7.61208	7.75461	7.93957	7.6577
SENP7__chr3	3.5984	3.89323	4.17645	4.13378	3.76543	3.00629	3.48994	3.09247	4.61596	4.70452	4.76964	4.36224
C2orf29__chr2	5.55259	5.33381	5.20887	5.47773	5.69143	5.54545	5.57293	5.45002	4.88416	5.08785	4.577	5.07274
CCDC71L__chr7	4.3609	3.78632	4.99314	5.18823	4.581	4.21574	4.95626	4.68599	5.34359	5.50289	5.67654	6.22474
SERTAD1__chr19	2.3146	2.40781	2.30198	2.0183	3.51389	3.25421	3.37129	2.77697	1.77724	2.18096	2.76964	1.90281
TRIP6__chr7	5.12196	5.2558	3.73939	4.34023	5.25086	5.23511	4.85672	5.39886	4.26663	3.79567	3.35461	3.48778
DUSP8__chr11	2.4349	2.50092	4.22481	3.89277	2.4435	0.591249	3.66828	3.28511	5.55253	5.52081	5.76964	5.36224
PBX1__chr1	8.87119	8.67584	9.20787	9.16466	8.39304	7.82965	9.11315	8.91447	9.67346	9.69172	9.68851	9.86571
NKAIN3__chr8	0.791043	0.500916	2.8463	1.43334	-0.878427	0.00628651	1.04937	0.985554	2.53623	2.98831	2.76964	3.71017
ANXA1__chr9	4.62393	4.74884	4.37523	4.9569	6.63727	6.77447	6.31347	6.68172	5.48619	4.85338	4.93957	3.71017
STK24__chr13	8.30378	8.17157	8.06464	7.79966	8.02244	7.95757	7.66197	7.56588	7.48831	7.46867	6.62763	7.26036
FAM126A__chr7	4.4349	4.38356	3.8463	4.24069	4.3695	4.59125	3.66828	3.92897	3.12119	3.50289	3.35461	3.22474
CDC20__chr1	6.34946	6.41978	6.00704	5.43334	6.3114	5.88893	6.13683	5.7322	4.61596	4.97537	4.76964	4.99028
FCHO1__chr19	2.79104	3.20136	2.36087	2.75527	2.12157	2.00629	1.94245	2.64267	4.34359	4.42889	2.76964	4.07274
SNX3__chr6	6.39467	6.5562	6.5308	6.0183	6.57278	6.67162	6.75376	6.67743	6.01932	6.12347	5.67654	5.76079
PPWD1__chr5	3.72178	3.78632	3.62391	3.89277	3.51389	2.91318	3.1489	3.01303	2.93478	2.64039	1.76964	1.90281
PAX6__chr11	3.98087	3.99277	6.4852	6.29132	3.12157	3.59125	5.64289	5.34581	3.0768	3.35088	4.93957	4.48778
NOTCH3__chr19	6.85713	6.8716	6.50492	6.58309	5.73628	6.01751	5.3081	5.78097	5.46912	4.72012	3.35461	5.22474
IKBKB__chr8	4.67369	4.60944	4.83596	5.38754	4.25086	4.43255	4.78117	4.78496	4.09917	4.13515	4.09157	4.48778
NUDCD3__chr7	5.64902	5.61986	5.72264	5.75527	5.62937	5.23511	5.57293	5.54721	6.16426	5.91567	5.85711	6.32908
BRK1__chr3	8.09824	8.31309	8.03895	8.06996	8.40698	8.35501	8.35184	8.19276	8.45401	8.69961	8.73543	8.44197
UGDH-AS1__chr4	2.64902	2.67084	3.10934	4.24069	3.12157	4.05068	4.56394	4.66882	4.3622	6.21438	8.64001	7.29513
PTPRS__chr19	7.56088	7.57506	7.98965	8.11282	7.03446	6.99497	7.72179	7.54838	8.11297	8.32689	8.1272	8.32067
SDC3__chr1	6.68889	6.55076	6.43812	6.36408	6.59731	6.34614	6.18453	6.32951	7.61402	7.64039	6.72384	6.90281
HNRNPA0__chr5	7.507	7.52051	7.39474	7.62316	7.16049	7.19116	6.72179	7.20993	7.35989	7.35088	6.93957	7.57524
STXBP1__chr9	4.62393	4.69074	5.16823	5.43334	4.82201	4.98357	5.4994	5.70718	6.90969	6.97862	6.22908	6.48778
CNKSR2__chrX	4.18336	4.08588	4.49838	4.24069	3.51389	2.91318	4.12465	4.01303	4.28625	4.79567	5.35461	5.22474
RP1-177G6.2__chrX	3.07644	2.08588	2.80448	2.43334	2.4435	2.32821	2.56394	2.8397	4.38058	4.18096	3.35461	4.36224
STOML1__chr15	1.11297	0.822844	0.0389457	0.433339	2.12157	2.59125	2.04937	1.37258	1.77724	2.50289	1.76964	0.902813
PABPC1__chr8	8.10506	7.95624	7.65953	8.01077	8.39537	8.23751	8.05739	8.08844	8.09778	7.82662	7.74692	7.77318
MSH2__chr2	6.79386	6.81833	6.58738	6.90907	6.32125	6.19611	6.62139	6.38578	6.08803	6.14674	6.09157	6.22474
PSMA2__chr7	6.54259	6.64047	6.54357	6.24069	6.72149	6.55318	6.6514	6.57052	6.23162	6.15824	6.16196	6.18821
ROGDI__chr16	2.5984	2.50092	3.575	2.43334	2.92893	3.00629	3.52741	3.39364	3.74923	3.8814	4.09157	3.71017
TFDP2__chr3	6.23399	6.09337	5.5812	5.47773	6.01639	5.93702	6.02337	5.88503	5.41665	5.32051	5.22908	4.71017
MCCC2__chr5	6.48801	6.51214	6.15165	6.56262	5.87646	6.09375	6.2078	6.06975	5.56865	5.52969	4.577	4.99028
DNALI1__chr1	5.99072	5.72973	5.8463	5.89277	5.75093	5.70673	6.18453	5.94333	5.29597	5.34083	5.47008	5.48778
TRIM2__chr4	6.24225	6.0555	6.44153	6.68127	5.73628	5.63564	6.43677	6.03331	6.98369	7.01068	6.76964	7.36224
CCDC90A__chr6	4.85713	4.82284	4.575	4.5208	5.12157	4.83918	4.95626	4.86254	3.98369	4.20333	2.76964	3.22474
ZKSCAN2__chr16	4.61122	4.58838	4.71702	4.43334	4.16597	4.3986	4.43184	4.66882	4.81827	5.14674	5.22908	5.07274
COPRS__chr17	7.92547	8.02055	7.72124	7.55228	7.91274	7.69628	7.67037	7.42467	7.60428	7.48245	7.05505	7.18821
ESPL1__chr12	5.10393	5.2558	4.76141	4.82566	4.02846	4.32821	3.96993	4.07953	2.88416	2.98831	4.09157	2.90281
WDR5__chr9	5.24225	5.38356	4.43126	4.75527	5.62937	5.76117	5.70144	5.75679	4.73501	5.07578	4.577	4.36224
SVIP__chr11	4.75683	4.85847	4.34637	4.89277	5.02846	4.65014	4.59956	4.66882	4.12119	3.57328	2.76964	2.48778
ANK3__chr10	4.13089	3.6302	4.65953	4.75527	4.02846	4.76117	4.56394	3.99936	6.27647	6.57756	5.76964	6.07274
TUBB3__chr16	10.6794	10.4757	10.9599	10.6954	10.9529	10.6734	11.3003	11.1441	12.1143	12.1278	11.5428	11.8142
DNAJC2__chr7	3.37601	3.20136	3.33173	2.43334	5.25086	5.17621	5.03643	4.70297	3.3622	4.8814	4.577	4.22474
CHURC1__chr14	6.42404	6.23563	6.27544	6.16126	6.64513	6.25421	6.57293	6.30192	6.26168	6.1117	6.22908	5.94721
TNRC6A__chr16	6.35329	6.32746	6.54991	6.58309	5.92893	5.97207	6.20201	6.04	6.4211	6.58184	6.35461	6.60325
C11orf57__chr11	4.3609	4.20136	4.52437	4.24069	4.07577	4.25421	4.76557	4.48479	4.67671	4.78087	5.67654	5.15074
PCNA__chr20	5.95091	6.00076	6.06575	5.89277	5.35039	5.29169	5.96311	5.71557	4.18533	4.35088	4.76964	2.90281
SIRT2__chr19	4.23399	4.14477	4.62391	4.34023	4.12157	4.32821	4.19621	4.3404	5.35293	5.24705	5.35461	4.71017
SURF4__chr9	6.44925	6.30182	5.90684	5.43334	6.86304	7.07775	6.73787	6.70507	6.17483	5.96232	5.22908	5.76079
SOCS7__chr17	3.96097	4.22884	4.59966	4.13378	3.76543	3.81364	3.85672	3.94333	4.83169	4.93585	4.577	5.29513
GPR162__chr12	3.49148	2.50092	2.88694	2.43334	2.92893	3.25421	2.56394	2.98555	4.45184	4.20333	4.35461	3.71017
AR__chrX	3.62393	3.96035	3.73939	3.60326	3.76543	3.32821	3.73386	3.8397	2.72066	2.08785	1.76964	2.90281
ANXA3__chr4	3.14859	2.82284	1.62391	3.0183	4.33103	4.56088	3.19621	3.21585	2.24673	1.8814	1.76964	1.90281
NRAS__chr1	6.49495	6.59895	6.33173	6.31598	6.71403	6.87665	6.53203	6.48969	6.12665	5.90206	6.22908	5.76079
TRIM3__chr11	2.4349	3.14477	2.67121	3.0183	3.20904	3.32821	3.19621	2.95754	3.63139	3.67281	3.76964	3.90281
MTRNR2L1__chr17	9.08106	9.1064	9.70286	9.61821	9.11026	8.96194	9.80234	9.22396	9.51974	9.63629	10.0734	9.97695
DAD1__chr14	7.04843	7.33381	7.04569	6.8596	7.53943	7.59874	7.42192	7.38709	6.85159	6.90547	7.16196	6.83355
ALG2__chr9	5.3609	5.68083	5.51792	5.18823	6.155	6.00629	5.47083	5.83586	4.89698	4.90888	4.35461	5.07274
CIRBP__chr19	8.30773	8.12845	8.27352	8.00319	8.39537	8.41143	8.70554	8.68279	8.66926	8.80667	8.79201	8.77933
E2F3__chr6	3.64902	3.40781	3.86676	3.60326	3.64513	3.17621	3.45146	3.77697	2.39873	2.57328	2.76964	3.22474
MAB21L3__chr1	3.92033	3.54531	4.86676	6.56262	4.16597	5.52985	6.30271	6.2738	6.01932	7.98024	10.1228	8.6577
LCMT1__chr16	6.44568	6.41381	6.44834	6.58309	6.24051	6.23511	6.5774	6.5067	6.89378	6.95245	6.76964	6.90281
RACGAP1__chr12	6.73649	6.53434	6.5812	6.45571	6.59731	6.13557	6.37129	6.1647	5.23667	5.03894	6.16196	5.07274
VAX1__chr10	4.51896	4.7677	4.28687	3.89277	4.07577	4.56088	4.17275	4.50428	3.3622	3.26842	2.76964	3.48778
CLIC4__chr1	5.89433	5.74884	6.08334	5.92519	6.46142	6.51408	6.65564	6.3404	6.29597	6.16395	6.01757	5.99028
GDPD1__chr17	3.72178	3.54531	4.75044	3.43334	3.76543	2.70673	4.24201	3.99936	5.45184	5.66477	5.47008	5.48778
ATXN2__chr12	6.13089	5.79554	6.04345	6.10576	5.54784	5.54545	5.60833	5.50428	6.09917	5.96886	6.09157	5.76079
DUSP4__chr8	6.38723	6.08588	6.6209	6.31598	6.794	6.52199	6.65564	6.64706	8.12392	7.87619	7.01757	7.7483
ERH__chr14	7.85848	7.98675	7.7463	7.64279	7.62937	7.87047	7.78891	7.62274	7.00458	7.21163	7.551	7.11227
EIF2S1__chr14	5.69793	5.53434	5.37523	5.68127	5.75093	5.8007	5.57293	5.75272	4.89698	5.24705	5.09157	4.71017
CCDC136__chr7	5.04843	5.08588	4.96495	4.89277	4.25086	3.70673	4.39176	4.29634	5.39873	4.57328	5.09157	4.99028
SMC4__chr3	6.62077	6.64047	6.5781	6.87628	6.3695	6.37261	6.41194	6.16776	5.34359	5.64039	5.76964	4.60325
C9orf16__chr9	6.02466	5.87596	6.05241	6.0183	5.86304	5.51408	6.28093	5.68599	6.30562	6.37078	6.72384	6.51752
SERPINH1__chr11	4.49148	4.17334	3.59966	3.60326	5.02846	5.05068	4.63433	4.75272	4.20608	3.85338	2.76964	3.90281
POFUT1__chr20	4.13089	3.89323	3.78311	3.60326	4.73628	4.21574	3.9969	4.02658	3.77724	3.18096	2.76964	1.90281
TMEM179B__chr11	6.54259	6.50092	6.04793	5.9569	6.69143	6.69279	6.48519	6.61154	5.81151	5.71234	6.01757	5.54667
TRA2B__chr3	8.96284	8.93763	8.96079	8.80403	9.05821	8.71019	9.07173	8.83394	8.52698	8.37078	8.577	8.61706
ZCCHC3__chr20	6.70393	6.59895	7.18666	7.07719	6.20904	6.22546	6.86772	6.85876	6.37601	6.59035	7.05505	7.05256
STX7__chr6	5.32242	4.89323	5.36087	5.82566	5.38836	5.67871	5.34004	5.36193	6.26168	6.34083	6.29321	6.48778
CSE1L__chr20	9.67598	9.64685	9.21337	9.23747	9.75366	9.39215	9.35771	9.11206	8.85488	8.84896	8.79201	8.85118
JAM3__chr11	5.60482	5.59895	5.22481	5.47773	5.49661	5.54545	5.51814	5.39886	5.05408	5.13515	4.35461	4.8097
EPS15__chr1	6.34563	5.97665	5.88694	6.10576	6.16597	5.86427	5.90022	5.96811	7.23415	6.70844	6.16196	7.15074
RAB14__chr9	5.5984	5.43165	5.86676	5.38754	5.4435	5.621	5.76557	5.64706	6.0368	6.0636	6.09157	6.15074
BEX2__chrX	7.95846	7.92298	7.97441	7.82566	8.11309	7.96629	8.16534	7.84736	8.92229	8.94251	8.4135	9.21115
IRAK1__chrX	3.18336	3.30827	3.10934	3.89277	3.2915	3.52985	3.56394	3.53304	2.32473	2.70452	1.76964	1.90281
CRIP2__chr14	7.27082	7.4405	7.12429	7.24069	7.51389	7.51011	7.56619	7.70086	8.37715	8.11465	7.74692	7.88009
SH3KBP1__chrX	3.21731	3.99277	4.64775	3.75527	4.12157	4.05068	4.45146	4.53304	5.031	5.13515	5.35461	5.94721
TSHZ2__chr20	3.72178	3.45511	4.30198	4.5208	1.70654	2.70673	4.87137	4.76085	5.64666	6.43362	6.81404	6.36224
MALT1__chr18	5.02945	4.78632	4.28687	4.34023	4.67616	5.13557	4.54579	4.73633	4.14289	4.1117	3.76964	3.22474
CELSR2__chr1	7.02226	6.86724	7.15996	7.09155	6.45249	6.26367	6.5774	6.62719	7.28625	7.36831	6.9791	7.13163
NCALD__chr8	5.53251	5.44343	5.14328	5.34023	4.70654	3.86427	4.52741	4.50428	5.69885	5.35088	5.09157	5.07274
INO80C__chr18	4.88907	5.10083	4.62391	4.82566	4.61343	4.88893	4.68495	4.75272	4.30562	4.37078	3.76964	3.48778
FJX1__chr11	5.42767	5.22884	5.14328	4.68127	5.3114	5.36384	5.26438	5.57513	4.46912	4.68875	4.35461	4.22474
MRPL37__chr1	6.08566	5.93554	5.43126	5.38754	6.17686	6.14584	6.04937	5.95754	5.52801	5.31024	5.47008	5.15074
SYT7__chr11	1.25047	1.82284	2.24058	2.0183	1.92893	1.32821	2.56394	2.67743	3.98369	4.39041	3.76964	3.48778
DBC1__chr9	2.18336	1.96035	2.24058	3.0183	1.12157	1.32821	0.826974	1.53304	2.88416	1.98831	1.76964	2.90281
SCO1__chr17	5.17475	5.10083	4.76141	5.24069	4.73628	5.05068	5.0749	5.0599	4.55253	4.28948	4.09157	4.22474
LYPD1__chr2	4.74524	4.92718	5.2484	5.24069	5.59731	5.72053	5.17275	5.50912	4.34359	4.33071	3.76964	4.71017
NELL1__chr11	1.37601	1.96035	4.24058	4.5208	0.121573	0.00628651	3.73386	3.67743	4.63139	4.50289	5.35461	5.90281
RPS6KL1__chr14	1.69793	1.67084	2.76141	0.433339	1.92893	1.59125	1.56394	2.192	3.90969	4.26842	4.09157	3.90281
NPC2__chr14	7.18551	7.06697	6.64183	6.68127	7.02846	6.97783	6.43184	6.32951	6.78416	6.47558	5.47008	5.8097
NAPB__chr20	2.25047	1.50092	3.30198	2.43334	1.92893	2.17621	3.37129	2.98555	4.24673	4.15824	4.09157	5.54667
MAGEH1__chrX	5.37601	5.72008	5.80448	6.0183	4.90293	5.57614	5.29729	5.57973	6.08243	6.38063	6.29321	5.99028
PSRC1__chr1	6.4349	6.30827	6.48189	6.5208	5.70654	5.85178	6.1062	6.31854	5.53623	5.49384	4.93957	5.07274
NRG3__chr10	0.598398	0.822844	0.717018	0.433339	0.121573	0.00628651	0.563939	-1.71489	2.0768	2.35088	1.76964	1.90281
TGIF2__chr20	5.99072	5.86724	5.43812	5.29132	5.54784	5.3986	5.34004	5.58432	4.77724	4.85338	3.35461	3.71017
BTF3__chr5	7.76975	8.02839	7.5781	7.45571	7.89306	8.40075	8.03643	7.89152	7.46266	7.78458	7.72384	7.39467
PANK2__chr20	5.77973	5.98473	6.3965	6.38754	5.67616	5.86427	6.35575	6.06647	5.53623	5.41936	5.67654	5.54667
RFX7__chr15	5.18336	5.28228	5.47857	5.0183	5.51389	5.09375	5.34004	4.92897	5.66176	5.90206	6.29321	5.8097
PTCD3__chr2	5.73356	5.67084	5.87184	5.68127	5.25086	5.49814	5.88587	5.51393	4.7633	5.26842	5.47008	4.90281
JMJD8__chr16	5.5724	5.79554	5.27926	5.82566	4.97955	5.48202	5.12465	5.24512	5.01932	5.00114	4.93957	5.07274
C14orf132__chr14	6.56583	6.40781	6.99779	6.49943	5.72149	5.74775	6.55035	6.13686	7.25422	7.41218	7.01757	7.39467
NOL10__chr2	3.98087	4.20136	3.82554	4.43334	3.97955	3.81364	3.96993	3.62496	3.32473	3.22535	2.76964	3.22474
MPP3__chr17	3.81341	4.02448	4.05687	4.60326	3.20904	3.00629	4.45146	4.0533	5.38058	4.93585	5.85711	5.07274
KHSRP__chr19	7.79245	7.65826	7.575	7.49943	7.38367	7.09904	7.32682	7.35792	7.20608	7.18658	7.19591	6.90281
STK32B__chr4	2.11297	2.08588	2.92647	2.0183	2.581	3.00629	2.9969	3.1431	3.69151	3.8814	3.76964	4.90281
CUX1__chr7	6.25047	6.16625	6.52759	6.04805	5.64513	5.13557	5.9355	5.83586	6.38514	6.37078	6.52453	6.36224
RNF181__chr2	8.38723	8.4168	8.1836	7.99558	8.93054	8.81364	8.95368	8.92897	8.37142	8.40617	8.70038	8.1696
SNRPD2__chr19	8.21731	8.17157	8.04905	8.0627	8.27386	8.33047	8.18159	8.45253	7.56062	7.63217	7.89893	7.84533
WRB__chr21	9.08394	9.00673	9.10557	9.17817	9.25472	9.15603	9.39746	9.12982	9.32473	9.43007	9.65229	9.54667
CELF4__chr18	2.49148	3.02448	3.9838	4.68127	3.02846	3.17621	3.66828	3.85497	5.90969	6.12347	5.577	5.42637
PLRG1__chr4	5.29089	5.34641	5.30198	5.13378	4.95446	5.19611	5.0749	4.94333	4.88416	4.96232	4.577	4.8097
NRSN1__chr6	0.960968	2.08588	3.14328	1.43334	1.92893	2.00629	3.1489	2.80868	4.7633	5.19219	4.09157	4.90281
ELAVL3__chr19	6.22983	6.04007	7.32804	6.75527	6.3977	6.43255	7.12159	7.02321	8.04834	8.28556	7.89893	7.92518
LINGO1__chr15	2.03897	1.08588	2.88694	2.75527	1.12157	2.17621	3.41194	2.64267	4.56865	4.52081	4.35461	4.8097
EBNA1BP2__chr1	5.23399	4.94386	4.87689	4.5208	5.794	5.82647	5.58186	5.8397	4.48619	4.76592	3.76964	4.8097
NARS__chr18	6.5887	6.57773	6.7057	6.54186	6.81506	6.88893	7.23636	6.70086	6.43874	6.17531	6.72384	5.99028
SHMT2__chr12	5.96597	6.07834	5.47191	5.71874	5.77978	5.85178	5.85672	6.08601	5.20608	5.24705	4.35461	5.15074
AMOTL2__chr3	6.76832	6.83631	6.61486	6.47773	7.1328	7.07775	6.70554	6.909	6.42995	6.59881	6.52453	6.32908
SDHB__chr1	6.3028	6.00871	6.20083	6.07719	6.62142	6.59874	6.36095	6.33768	6.19574	6.1176	6.09157	6.07274
ZNRD1__chr6	4.03897	3.78632	3.71702	3.75527	3.76543	4.17621	4.0749	4.20398	2.93478	3.39041	3.35461	2.90281
XPO1__chr2	5.99072	6.00076	5.90189	6.18823	5.84949	5.98357	5.45146	5.58889	5.47768	5.47558	5.35461	5.29513
SBNO1__chr12	4.99072	4.6302	5.10934	5.13378	4.73628	4.3986	4.81187	4.52352	5.39873	5.08785	5.09157	5.29513
ATL1__chr14	3.69793	4.08588	3.49838	3.75527	3.76543	3.91318	4.1489	3.92897	4.46912	4.52081	4.93957	4.60325
SLC7A5__chr16	5.53924	5.53434	4.44494	5.18823	6.3695	7.15603	6.25324	6.71974	5.72785	5.37078	5.35461	4.8097
CDK19__chr6	4.29884	4.69074	4.63588	5.29132	4.12157	4.36384	4.7966	4.8397	5.42553	5.34083	5.22908	5.6577
PLEKHG1__chr6	5.53251	5.4667	4.93619	4.9569	5.51389	5.38133	4.96993	5.10529	4.0768	4.57328	4.577	3.90281
DACT3-AS1__chr19	-1.20896	0.0858784	-2.28298	0.433339	-0.878427	1.32821	-1.75799	-1.71489	2.53623	3.08785	4.09157	4.22474
PPP2R5B__chr11	2.74524	2.96035	3.88694	3.60326	2.92893	3.52985	3.66828	3.30748	4.79105	4.72012	4.35461	5.22474
TUBB2B__chr6	9.56953	9.4832	10.1056	9.75527	9.62838	9.33496	10.1027	10.0931	10.7528	10.8142	10.477	10.8858
FAM228B__chr2	4.29884	3.54531	4.17645	4.24069	4.07577	3.96048	4.24201	3.95754	4.5846	4.70452	5.22908	4.99028
LRP10__chr14	5.07644	5.44343	5.25618	5.18823	5.75093	5.69279	5.85672	5.67743	4.97162	4.64039	4.09157	3.71017
RTF1__chr15	5.57895	5.4782	5.61788	5.82566	5.18766	5.32821	5.57293	5.44499	5.65423	5.88832	5.85711	6.22474
KIAA2022__chrX	3.11297	3.14477	3.41746	3.60326	2.4435	2.00629	3.70144	3.71138	4.18533	4.86746	4.577	5.29513
HN1__chr17	10.1753	10.1407	9.98058	9.98023	10.6059	10.4056	10.7724	10.8104	10.5182	10.5497	10.4735	10.4878
SNRPA1__chr15	6.17042	6.32109	5.99314	6.29132	6.3114	6.31917	6.1062	6.01982	5.56062	5.40978	5.67654	5.71017
RAB11B__chr19	8.15189	8.08776	8.47023	8.00319	7.7289	7.46981	8.08121	7.87102	8.68321	8.57005	8.45615	8.54667
EMG1__chr12	5.76259	5.84077	5.15996	5.29132	5.69143	6.10432	6.02991	6.11484	4.98369	4.52081	3.35461	4.36224
FSTL1__chr3	6.84361	6.78632	6.40001	6.73712	7.27132	7.62467	7.11853	7.55541	6.38058	6.0636	5.22908	4.71017
NES__chr1	9.22983	9.2407	7.88444	7.5208	9.20239	9.15222	8.30675	8.57628	7.89698	7.80849	7.44207	6.92518
C19orf24__chr19	3.54593	3.67084	3.17645	3.24069	4.3695	4.29169	3.45146	3.76085	3.3622	3.18096	1.76964	2.90281
DDX24__chr14	8.29188	8.12662	8.32804	8.23424	8.34557	8.10695	8.55829	8.33156	8.77811	8.5861	8.577	8.77933
KIF9__chr3	2.37601	3.08588	2.8463	2.75527	2.581	2.91318	2.9969	3.118	2.16426	2.08785	1.76964	1.90281
PPP1R13B__chr14	0.376005	1.50092	0.524373	0.433339	1.70654	2.00629	0.563939	1.45504	2.53623	2.82481	3.35461	2.48778
RNF165__chr18	4.96097	5.33381	5.88192	5.24069	5.12157	5.621	6.00356	5.57973	6.50307	6.93585	6.29321	6.42637
RTN3__chr11	7.3609	7.1944	7.37701	7.57289	7.67616	7.49413	7.66618	7.46875	7.77029	7.74891	7.91939	7.85701
POLB__chr8	4.21731	4.30827	4.15996	4.24069	4.84949	4.21574	4.58186	4.26239	5.13208	5.38063	5.93957	5.07274
WDHD1__chr14	4.55923	4.6302	4.03895	3.75527	3.51389	4.09375	3.82697	3.04	2.16426	2.64039	2.76964	2.90281
WBP11__chr12	6.07181	6.02448	5.92159	6.10576	6.24051	6.0831	6.19621	5.93975	5.81151	5.75839	5.577	5.42637
RFWD3__chr16	7.59356	7.24575	7.12853	6.60326	7.14394	6.90715	6.59074	6.77094	6.39421	6.1525	6.4135	6.11227
SPC25__chr2	5.89433	6.04781	5.38235	5.92519	5.2915	5.05068	5.37129	5.34581	4.22655	4.20333	4.577	3.22474
HRSP12__chr8	5.72768	5.44343	5.76687	5.68127	4.92893	4.83918	5.37129	5.37258	4.63139	4.60722	4.35461	5.15074
GPM6A__chr4	5.64902	5.70059	7.36268	7.32816	5.53096	5.11481	7.1757	6.74044	8.23793	8.49043	8.05505	8.87436
ABCA2__chr9	3.07644	3.08588	3.49838	2.43334	2.92893	3.59125	3.28641	2.32951	4.0768	3.93585	4.93957	3.22474
WDR41__chr5	5.18336	5.07077	4.81505	4.75527	5.07577	5.19611	4.7966	4.94333	4.56865	4.48474	3.35461	4.07274
PPIE__chr1	4.40575	4.4782	4.52437	3.89277	4.54784	4.91318	4.68495	4.43486	3.98369	3.90888	4.09157	2.90281
CLASP1__chr2	6.97344	6.96852	7.22679	6.71874	6.54784	6.91918	7.25882	7.1493	7.58855	7.70844	7.70038	7.76079
C3orf14__chr3	3.69793	3.58838	3.59966	3.75527	4.16597	4.17621	4.56394	4.06647	3.28625	3.70452	3.76964	3.48778
SSR3__chr3	6.42404	6.20136	5.91669	6.10576	7.08157	7.23511	6.78117	6.75882	6.16426	5.81032	6.35461	5.60325
SNHG15__chr7	6.40943	6.20828	6.3859	6.34023	7.4435	7.21574	6.94937	7.118	6.04834	6.26311	6.577	6.57524
NANS__chr9	4.03897	4.6302	4.0208	4.13378	4.54784	4.70673	4.45146	4.43486	4.00754	3.76592	3.76964	3.71017
NUCKS1__chr1	8.5147	8.5804	8.44579	8.61325	8.13	8.08577	8.32016	8.28511	7.95791	8.22672	8.16196	8.02175
KLF7__chr2	5.22567	4.72973	5.47857	5.60326	5.581	5.67871	5.69322	5.48479	6.38968	6.34083	6.29321	6.18821
CHGB__chr20	1.96097	2.30827	2.36087	2.75527	1.12157	2.17621	2.76557	2.67743	3.93478	4.08785	3.35461	4.22474
TMEM66__chr8	5.99072	5.93554	6.25618	6.54186	6.17686	6.06157	6.42192	6.24222	6.57266	6.40496	6.81404	6.7357
INPP5E__chr9	4.61122	5.00871	4.99314	4.9569	3.76543	4.49814	4.19621	4.68599	4.74923	5.09982	5.09157	4.90281
CLU__chr8	7.89433	7.67584	7.46521	7.3522	8.14671	8.04246	7.81187	7.88037	7.75628	7.37572	6.62763	6.7357
XKR6__chr8	3.2829	2.82284	4.73939	3.43334	3.4435	3.52985	3.73386	3.77697	4.61596	5.67281	5.67654	5.29513
IGF2R__chr6	4.50529	4.45511	4.38944	3.89277	5.20904	5.11481	4.68495	4.64267	4.85816	4.48474	4.09157	3.71017
GARS__chr7	6.2869	6.42573	6.23272	6.13378	6.69143	6.91918	6.78117	6.97161	6.70616	6.66074	6.81404	7.07274
LOC100289092__chr16	5.03897	5.00871	4.47191	4.13378	4.70654	4.25421	4.70144	4.64267	3.20608	3.53851	3.76964	2.90281
EXTL2__chr1	5.37601	5.4782	5.47191	5.47773	4.51389	4.56088	4.9969	4.66882	4.73501	4.57328	5.35461	4.48778
NOVA1__chr14	7.3571	7.31149	7.67557	7.79089	7.11593	7.10957	7.70144	7.42977	8.4211	8.67981	8.19591	8.25154
SUSD4__chr1	-0.623995	-0.499084	2.17645	1.43334	1.12157	1.00629	1.41194	1.45504	3.16426	3.31024	3.76964	3.22474
CCDC86__chr11	6.72768	6.37128	5.7723	5.82566	7.12157	6.74775	6.72179	6.99936	5.52801	5.48474	4.577	5.99028
C1orf198__chr1	6.58546	6.44928	6.32435	6.34023	6.18766	6.42414	6.38667	6.36992	5.73501	6.07578	5.35461	5.76079
SLC38A10__chr17	5.37601	5.41978	5.26391	5.13378	5.75093	5.27307	5.25324	5.20398	4.74923	4.83917	4.35461	4.8097
PID1__chr2	4.3146	4.30827	5.00242	5.24069	2.70654	2.70673	4.92851	4.47494	5.56062	5.34083	6.16196	5.71017
HSPE1__chr2	8.64201	8.84299	8.46605	8.59825	9.10884	9.07641	9.04291	9.04708	7.79619	8.00592	8.51111	8.23373
HEG1__chr3	5.84633	5.58838	6.08334	6.2147	4.95446	4.88893	5.1489	5.26811	4.61596	4.08785	5.09157	3.71017
BLOC1S2__chr10	7.9821	7.97259	8.02308	8.05539	8.5769	8.93406	8.61052	8.51694	8.39082	8.52969	8.65229	8.90281
CD151__chr11	7.23191	7.30505	7.05464	6.84273	7.49661	7.595	7.39936	7.50912	7.1402	6.80667	6.9791	6.76079
BTF3L4__chr1	8.58221	8.18566	8.68712	8.36408	8.62341	8.50414	8.99773	8.42786	9.07398	9.13806	9.21259	9.4574
KLC1__chr14	6.42767	6.35266	6.52115	6.92519	6.81506	6.30091	6.73787	6.73633	7.51559	7.5319	7.1272	7.41061
ELAVL1__chr19	7.15736	7.28882	7.26584	7.38754	7.2196	6.98357	7.3215	7.25378	6.7633	6.75839	6.4135	6.42637
MAPRE3__chr2	4.3146	3.74884	4.82554	4.75527	4.02846	4.21574	4.66828	4.57052	5.85159	5.91567	5.47008	5.60325
TNC__chr9	4.03897	3.99277	3.67121	3.43334	3.2915	3.65014	2.32947	3.192	4.64666	4.46636	4.09157	3.90281
RBBP4__chr1	7.00779	6.89752	6.7142	6.79089	6.09885	6.13557	6.21929	6.3404	6.64285	6.84984	7.05505	6.63073
PMF1__chr1	7.81341	7.77471	7.43298	7.26623	7.00422	7.10957	7.13379	7.14154	6.97162	6.9325	6.35461	6.71017
RNF187__chr1	6.57895	6.80012	6.83076	6.54186	6.59731	6.73421	6.83073	6.73633	7.22401	7.19219	7.1272	7.53217
PRKACB__chr1	5.16608	5.15913	5.51792	5.38754	5.25086	5.34614	5.52741	4.8165	6.66552	6.70452	6.09157	5.94721
NTN1__chr17	4.53251	4.7677	4.76141	4.24069	5.47912	4.70673	4.82697	4.74455	3.90969	3.76592	3.35461	3.90281
MCM8__chr20	4.23399	4.4782	4.56251	5.24069	3.70654	4.13557	3.88587	4.31854	3.63139	3.13515	3.76964	3.90281
FUBP3__chr9	5.29884	5.21516	5.30947	5.0183	5.59731	4.96048	5.3081	5.24512	4.95944	4.46636	4.09157	4.36224
LOC100129361__chr12	6.73356	6.4896	6.5781	6.26623	6.60539	6.38999	6.57293	6.42467	6.09361	6.23081	5.76964	5.71017
SEMA4C__chr2	2.83544	3.3589	3.71702	4.13378	3.4435	3.09375	3.59956	3.80868	4.26663	3.98831	4.76964	4.60325
FBLN1__chr22	7.82722	7.79554	6.52759	6.68127	7.42991	7.22546	6.44658	6.49943	6.93789	6.68478	6.22908	5.60325
ATXN7L3__chr17	6.26272	6.3589	6.29822	6.49943	6.26112	6.61362	6.5088	6.58432	7.31281	7.41697	6.62763	7.53217
COMMD6__chr13	6.06251	6.07834	6.06131	5.92519	5.97955	6.01751	6.08121	6.09247	6.37142	6.31538	6.29321	6.54667
TIMM50__chr19	6.81063	6.83183	6.43469	6.07719	6.88976	6.87047	6.84564	6.8813	6.32473	6.19219	5.85711	5.99028
MSN__chrX	5.39837	5.57773	5.51792	4.68127	5.4435	5.83918	5.78117	6.02658	4.74923	4.37078	4.09157	4.07274
RPL36__chr19	9.16064	9.06316	9.00761	9.02205	9.46587	9.41886	9.36484	9.31957	8.88496	8.8338	9.06427	9.10248
PSMG1__chr21	5.35329	5.4667	4.79383	4.68127	5.12157	4.88893	4.3081	4.50428	4.00754	3.98831	4.09157	4.07274
PINK1__chr1	4.49148	4.3589	4.62391	4.60326	3.51389	3.91318	4.43184	4.32951	5.44312	5.36087	4.93957	5.42637
C6orf48__chr6	6.58546	6.52882	6.78311	6.75527	7.18766	7.01751	7.1549	6.89059	6.98669	7.0636	7.38435	7.24266
SOX4__chr6	9.92354	9.7583	10.8078	10.6966	10.111	9.6411	10.9364	10.5792	11.619	11.7883	11.5279	11.6006
RUNDC3B__chr7	1.87851	1.50092	3.76141	3.89277	2.2915	2.59125	3.56394	3.09247	5.00754	5.16964	4.93957	5.29513
SH3GL2__chr9	3.5984	2.74884	3.30198	3.0183	2.70654	3.81364	3.56394	4.01303	4.64666	4.76592	5.09157	5.15074
RMDN1__chr8	4.93059	4.99277	4.45848	4.75527	5.51389	5.56088	5.56394	5.66882	4.28625	4.76592	4.577	3.71017
DCAF6__chr1	4.47754	4.33381	4.76141	4.43334	3.4435	3.96048	4.02337	4.09247	4.53623	4.48474	4.76964	5.15074
NME1__chr17	7.78256	7.95006	7.50492	7.56262	8.18227	8.06698	8.21212	8.3054	7.12665	7.02645	7.52453	7.42637
IMPG2__chr3	-0.208957	0.0858784	0.524373	0.433339	0.121573	-0.993713	0.242011	0.285114	2.16426	0.502887	1.76964	2.90281
RNF26__chr11	4.98087	4.82284	4.45848	4.24069	5.16597	4.36384	4.3081	4.15548	3.74923	4.0636	3.76964	3.22474
ELAVL4__chr1	1.49148	1.50092	3.54991	3.24069	0.706535	1.32821	3.41194	3.192	3.83169	4.98831	4.93957	4.48778
MAPK6__chr15	7.87452	7.67334	8.03217	8.0183	8.09599	8.10432	7.98348	7.96723	8.28747	8.3977	8.45615	8.60325
GBE1__chr3	4.54593	4.33381	4.12641	4.5208	5.2915	5.43255	5.2078	5.0599	4.39873	3.82481	4.577	3.90281
TEX2__chr17	3.81341	3.71037	4.12641	3.24069	3.82201	3.3986	3.9969	3.5519	4.43435	4.28948	4.76964	4.8097
ING4__chr12	4.49148	4.20136	4.61184	4.13378	3.70654	3.96048	4.32947	4.39364	4.89698	5.07578	5.35461	4.8097
TAC1__chr7	1.69793	1.30827	4.52437	3.75527	1.12157	1.59125	3.52741	3.28511	3.83169	4.0636	5.35461	4.48778
SEMA5B__chr3	5.07644	5.14477	6.19275	5.75527	4.3695	4.00629	5.35054	4.9786	3.28625	4.13515	3.35461	3.48778
GNAS__chr20	12.0876	12.1456	11.9626	11.9451	12.2338	12.1608	12.1491	11.9749	12.5212	12.4948	12.1555	12.3628
FAM105B__chr5	3.74524	3.54531	3.33173	3.60326	4.25086	4.00629	3.94245	3.79291	3.32473	3.08785	1.76964	2.48778
LIN28A__chr1	6.15736	5.77704	3.71702	4.24069	5.25086	4.93702	3.73386	3.79291	3.56865	3.57328	2.76964	3.22474
GSTO1__chr10	5.60482	5.64047	4.82554	5.64279	5.40698	5.77447	5.36095	5.34581	4.55253	3.79567	4.35461	3.71017
SLC38A2__chr12	7.00779	6.63534	6.77501	7.25352	7.07577	6.79419	6.50411	6.55891	7.82834	7.36335	7.19591	7.6577
PHYH__chr10	4.2829	4.67084	4.28687	4.24069	4.90293	4.88893	5.02337	5.00621	4.28625	4.60722	4.09157	4.48778
CHN2__chr7	3.25047	3.2558	3.96495	4.60326	3.20904	2.91318	3.82697	3.74455	5.48619	5.61559	4.577	5.71017
ATP6V0D1__chr16	6.2829	6.32746	6.44494	6.45571	6.06409	6.56088	6.70962	6.71138	6.84829	7.09982	7.01757	6.90281
ZNF793__chr19	4.09482	3.58838	3.96495	4.89277	3.64513	3.3986	3.76557	3.92897	4.34359	4.79567	5.09157	5.15074
NCOA4__chr10	6.30674	6.32746	6.22877	6.45571	6.3695	6.31917	6.63003	6.37258	6.72066	6.77342	6.72384	6.83355
BSN__chr3	4.5724	4.69074	5.16823	5.18823	4.64513	4.3986	4.96993	4.66015	6.21635	6.40496	5.47008	6.51752
C2orf80__chr2	1.79104	1.50092	2.41746	2.43334	1.70654	0.00628651	2.88587	2.09247	3.72066	4.15824	4.09157	4.22474
STON1__chr2	4.85713	5.02448	5.01164	5.07719	4.20904	4.05068	4.61705	4.02658	3.12119	2.64039	3.35461	4.22474
CD2AP__chr6	4.03897	4.17334	3.80448	3.89277	4.40698	4.43255	3.66828	3.76085	3.12119	3.50289	2.76964	3.48778
EFHD1__chr2	4.03897	4.40781	3.96495	4.0183	3.2915	3.59125	2.48994	2.64267	2.32473	2.08785	2.76964	0.902813
TOMM20__chr1	7.95721	7.93137	8.03217	7.66216	8.31633	8.07775	8.35965	8.43676	8.58756	8.50401	8.4135	8.43419
HEXA__chr15	4.16608	4.28228	4.45848	3.89277	5.00422	5.00629	4.71774	4.73633	4.55253	4.0636	4.09157	3.71017
CLIP3__chr19	7.02466	7.09337	7.46185	7.51015	6.5562	6.48202	7.37387	7.1037	8.42553	8.34335	7.76964	8.51014
GEN1__chr2	4.74524	4.6302	5.26391	5.13378	3.87646	3.91318	4.21929	4.28511	2.77724	3.70452	2.76964	1.90281
CAPNS1__chr19	9.50615	9.69506	9.15841	8.92519	9.96549	10.1407	9.68909	10.0002	9.74436	9.68974	9.20427	9.26036
RAD51AP1__chr12	4.40575	4.20136	4.0208	3.75527	2.581	3.46572	2.94245	3.37258	2.53623	2.98831	2.76964	1.90281
QRICH1__chr3	7.17042	7.10825	6.78848	6.80838	6.63727	6.3372	6.57293	6.46253	6.75276	6.59459	6.577	6.54667
SAT1__chrX	7.22983	7.08963	8.23272	7.53137	6.18766	6.68577	6.40188	6.57052	6.38968	6.21438	6.72384	6.51752
POMP__chr13	7.48453	7.24911	7.25424	7.57289	8.04044	7.87973	7.85304	7.92174	7.31759	7.26311	7.47008	7.8097
PDCD5__chr19	6.21731	6.04781	6.17234	6.18823	6.4435	6.58372	6.26438	6.26525	5.83835	5.92915	5.93957	5.54667
DAB2IP__chr9	5.59194	5.69074	5.40352	5.56262	4.40698	4.96048	5.16087	4.80868	5.77029	5.96232	5.47008	5.76079
MAP1LC3B__chr16	7.13534	6.91454	7.36268	7.17481	7.80807	7.97783	7.78117	7.8841	7.81827	7.6688	7.49756	8.0321
TSC22D3__chrX	3.34563	3.3589	4.27161	3.43334	3.82201	3.70673	4.28641	3.94333	4.64666	4.8814	4.577	4.99028
CBX5__chr12	9.19831	9.12114	9.08607	8.93318	8.7326	8.41991	8.85027	8.64212	8.75364	8.71331	8.79201	8.49527
SIAH1__chr16	4.66141	4.60944	4.76141	5.34023	4.67616	4.25421	4.98348	4.76893	5.28625	5.2999	5.35461	5.85701
LRP2__chr2	5.54593	5.41978	4.28687	4.75527	5.27132	4.98357	4.5088	4.47494	3.93478	3.60722	3.76964	3.90281
SEPT11__chr4	6.52236	6.53983	6.98146	7.09155	6.14394	6.17621	6.78504	6.51634	5.95944	5.81758	5.67654	5.6577
CREBZF__chr11	5.77404	6.07077	5.96495	5.82566	4.76543	5.27307	5.27543	5.20993	5.72066	5.53851	5.93957	5.36224
AKT1S1__chr19	6.64591	6.51214	6.4918	6.18823	6.80105	6.93702	6.67664	7.01982	6.41665	6.20886	6.09157	6.0321
ZFP36L2__chr2	4.50529	4.3589	4.63588	4.13378	4.97955	4.29169	4.66828	4.62496	3.28625	2.64039	1.76964	3.48778
FAM111A__chr11	2.25047	1.08588	3.03895	2.75527	1.92893	1.00629	1.94245	1.60704	0.398729	0.180958	1.76964	0.902813
SMIM18__chr8	1.79104	1.82284	2.76141	2.75527	0.121573	1.81364	3.04937	2.57052	4.41665	4.18096	4.09157	5.07274
VWA5A__chr11	3.64902	3.50092	3.88694	3.75527	3.97955	4.13557	3.73386	3.98555	5.3622	5.39041	4.577	4.48778
CORO7__chr16	2.87851	2.20136	2.92647	2.0183	2.12157	1.59125	2.76557	2.98555	3.80472	3.79567	4.09157	3.90281
FAM104B__chrX	6.18336	6.30827	6.23272	6.13378	6.24051	6.23511	6.39683	6.08278	6.42553	6.62804	6.93957	6.76079
FANCI__chr15	4.96097	5.04007	4.88694	5.13378	4.51389	4.21574	3.88587	4.28511	3.24673	3.73555	3.76964	2.48778
BDH2__chr4	5.66756	5.45511	5.19275	4.89277	5.00422	5.02865	4.81187	4.63384	4.30562	4.46636	2.76964	3.71017
LOC100129034__chr9	4.16608	3.99277	4.22481	4.34023	4.2915	4.09375	3.9969	4.50428	3.16426	2.82481	3.76964	3.71017
TXNL4A__chr18	6.89433	6.88893	6.89693	6.75527	7.39304	7.23511	7.3453	7.34581	6.73501	6.81758	6.22908	6.76079
PARP14__chr3	2.92033	2.67084	3.10934	2.43334	2.70654	2.70673	2.24201	2.60704	1.88416	1.8814	1.76964	0.902813
TULP4__chr6	5.79104	6.10825	6.20486	6.13378	5.86304	5.56088	5.92851	5.88503	6.88737	7.1176	6.4135	6.83355
SCD5__chr4	6.39096	6.2691	6.66538	6.04805	5.99194	5.76117	6.36613	6.118	6.81827	7.00114	6.81404	6.92518
DSEL__chr18	2.64902	3.3589	3.36087	3.89277	3.70654	3.46572	3.7966	3.6945	5.5925	5.57328	4.577	4.90281
RTCA__chr1	5.30674	5.33381	5.44494	5.18823	6.07577	6.05068	5.98348	5.95045	5.7979	5.61559	5.85711	5.07274
HSF2__chr6	4.93059	4.69074	4.86676	4.68127	4.54784	4.67871	5.1489	4.79291	5.5925	5.38063	5.47008	5.99028
MGAT3__chr22	3.4349	3.45511	3.17645	3.0183	2.2915	2.17621	2.63433	2.89982	4.18533	4.03894	3.35461	4.48778
FOSL2__chr2	3.25047	3.2558	2.36087	2.0183	4.90293	5.02865	4.63433	4.88503	4.05408	2.98831	1.76964	0.902813
SHISA2__chr13	5.97095	5.89323	4.88694	4.82566	4.67616	3.81364	3.52741	3.4144	3.83169	3.82481	3.76964	4.22474
RPS27A__chr2	10.6566	10.7312	10.4631	10.5208	10.7358	10.851	10.6596	10.7265	10.186	10.2558	10.4456	10.2865
EXO1__chr1	4.11297	4.14477	4.25618	3.24069	3.64513	3.17621	3.63433	3.23931	2.24673	2.18096	3.35461	0.902813
GPR98__chr5	5.85713	6.12297	5.35364	5.34023	5.12157	4.86427	4.9969	4.88503	5.00754	4.94914	4.35461	4.8097
PPIH__chr1	6.3302	6.37128	6.10072	6.04805	6.59731	6.52985	6.39176	6.22175	5.30562	5.38063	5.47008	5.90281
PTEN__chr10	4.73356	4.92718	5.14328	5.18823	4.61343	4.98357	4.85672	4.91447	4.83169	5.39041	5.47008	5.54667
SYT6__chr1	2.11297	2.30827	3.64775	3.24069	2.2915	1.00629	3.45146	2.64267	3.24673	3.13515	4.35461	4.48778
ASS1__chr9	4.90998	4.50092	3.76141	4.13378	3.70654	3.91318	3.09999	3.47494	3.50307	3.18096	3.35461	2.90281
RBMS2__chr12	5.39837	5.4896	5.08334	5.38754	5.794	5.93702	5.11238	4.98555	4.73501	4.60722	3.76964	2.90281
TEX10__chr9	4.16608	4.08588	3.47191	3.43334	4.54784	4.25421	3.85672	3.8397	3.43435	3.42889	2.76964	3.48778
MRPL19__chr2	5.5724	5.5562	5.52437	5.8596	5.77978	5.74775	5.91444	5.93617	5.24673	5.00114	4.35461	5.15074
ZCCHC12__chrX	2.69793	2.08588	4.6943	3.43334	3.2915	2.00629	4.47083	3.8397	5.51143	5.8814	5.67654	5.60325
CIB1__chr15	5.35329	5.14477	5.15165	4.34023	5.80807	5.51408	5.58186	5.3404	4.77724	4.6239	4.35461	2.90281
ZNF548__chr19	4.03897	3.54531	4.33173	3.60326	3.3695	3.59125	3.9969	3.67743	4.16426	4.35088	5.22908	4.90281
GPR153__chr1	4.92033	5.30827	6.77501	6.24069	4.84949	4.46572	6.45146	5.9786	6.94099	7.0544	7.09157	7.76079
CDKN2D__chr19	3.54593	3.08588	4.25618	4.24069	3.20904	3.70673	4.1489	3.74455	5.28625	5.35088	4.76964	5.71017
PRPF38A__chr1	5.17475	5.24238	5.0299	5.07719	5.25086	5.17621	5.29729	5.11166	4.30562	4.48474	3.35461	4.36224
KLHL7__chr7	6.69191	6.54531	7.10503	6.75527	6.64513	6.4901	7.0875	6.63826	7.33419	7.36335	7.29321	7.671
SERPINF1__chr17	7.19831	6.97259	5.5308	6.04805	6.12157	6.47389	5.35054	4.91447	6.21123	5.81032	4.76964	4.99028
ABCB7__chrX	3.96097	3.67084	3.36087	3.43334	3.97955	3.65014	3.28641	3.62496	2.83169	3.31024	2.76964	2.48778
TMEM14A__chr6	4.64902	4.85847	4.61184	4.68127	4.90293	4.621	4.58186	4.58889	5.20608	5.08785	5.09157	5.42637
SHC2__chr19	2.74524	3.20136	2.92647	3.0183	2.70654	2.00629	2.56394	2.80868	3.28625	3.60722	3.76964	3.90281
TMEM50B__chr21	5.55923	5.68083	5.54991	5.9569	5.82201	5.49814	5.63433	5.54721	5.21635	5.1117	4.76964	5.15074
CXADR__chr21	5.41309	5.59895	6.08334	5.43334	5.40698	5.48202	5.41194	5.55658	6.56464	6.57756	6.16196	6.32908
ACSL4__chrX	4.40575	4.2558	4.09206	3.75527	4.61343	4.56088	3.82697	3.95754	5.21635	4.98831	5.577	5.07274
NT5DC1__chr6	3.69793	4.17334	3.54991	2.0183	3.92893	4.00629	3.63433	3.6945	2.0768	2.18096	1.76964	1.90281
DGCR14__chr22	4.07644	3.74884	3.9838	3.60326	3.51389	3.32821	3.94245	3.64267	4.39873	4.08785	4.577	4.8097
MTHFD1L__chr6	4.77973	4.84077	3.575	4.24069	5.09885	5.29169	4.9969	5.11166	3.85816	4.31024	3.76964	3.22474
TCEAL2__chrX	2.5984	3.50092	4.47191	4.5208	2.581	2.17621	4.21929	3.79291	4.69151	4.76592	4.93957	5.8097
DIRAS1__chr19	4.20043	4.52328	4.56251	3.75527	4.16597	3.46572	4.43184	4.17993	5.18533	5.65669	5.47008	5.85701
CRIM1__chr2	4.94079	5.02448	5.04793	5.34023	5.97955	6.48202	5.47083	6.34581	5.09917	4.83917	4.09157	4.07274
CHST1__chr11	2.79104	2.58838	3.80448	2.0183	3.02846	3.00629	3.85672	3.3512	5.22655	5.20333	5.22908	3.48778
SEC62__chr3	6.95846	6.80012	7.20285	7.17481	6.99194	6.73421	6.90379	6.91629	7.19314	7.4893	7.49756	7.53217
MSRB2__chr10	7.74814	7.78632	7.5966	7.58309	7.63333	7.52592	7.80997	7.55073	7.0768	7.32816	7.2615	7.24266
TRIM69__chr15	-1.20896	-1.49908	-0.282982	0.433339	0.706535	-0.993713	0.242011	-0.392958	1.53623	2.50289	3.35461	1.90281
RRS1__chr8	4.07644	3.71037	4.05687	4.0183	4.20904	4.00629	3.52741	4.16776	2.93478	2.93585	3.35461	2.90281
KRT8__chr12	5.87851	5.67084	3.90684	3.89277	5.581	5.41568	3.70144	3.94333	3.66176	3.50289	3.35461	2.48778
CACYBP__chr1	7.53588	7.27241	6.85912	7.07719	7.35998	7.32821	7.19621	7.15702	6.88093	6.88486	6.76964	6.60325
EEF1E1__chr6	5.4204	4.92718	5.14328	5.0183	5.20904	5.52985	5.36095	5.3884	4.89698	4.60722	4.577	4.36224
CD164__chr6	5.34563	5.54531	5.08334	4.89277	5.83582	5.93702	5.35054	5.45002	5.12119	4.68875	4.09157	3.22474
PTK2__chr8	5.87319	5.71037	5.83596	5.56262	5.38836	5.21574	5.48042	5.192	5.71343	5.44775	6.09157	5.48778
E2F1__chr20	6.15736	6.17334	6.01164	5.98793	5.40698	5.02865	5.41194	5.42977	4.79105	4.53851	4.76964	3.22474
CALML4__chr15	3.07644	3.2558	2.30198	2.0183	1.4435	1.32821	1.41194	1.37258	1.66176	1.98831	1.76964	0.902813
PRMT5__chr14	5.75683	5.58838	5.65366	5.38754	6.11026	5.82647	5.98348	5.69026	5.00754	4.64039	3.76964	4.90281
CCNB1IP1__chr14	7.19192	7.18391	6.68568	6.70013	6.94175	7.26367	6.33477	6.3404	6.0768	6.34083	5.67654	6.29513
SLC1A5__chr19	6.27486	6.30182	4.91669	4.75527	6.4879	6.55318	6.19038	6.50186	5.20608	4.76592	3.76964	4.8097
PHF14__chr7	4.88907	4.89323	5.20083	5.29132	5.02846	4.46572	5.44168	5.04667	5.74923	5.98186	6.01757	5.71017
ZNF37BP__chr10	3.03897	2.89323	3.17645	3.43334	2.4435	2.00629	2.1489	2.77697	3.16426	3.79567	4.577	3.90281
MADD__chr11	3.98087	4.02448	3.9838	4.0183	3.3695	3.17621	3.91444	3.80868	4.5846	4.44775	4.93957	4.22474
UQCRC1__chr3	5.9357	5.8138	5.5308	5.92519	5.94175	5.88893	5.71774	5.85497	5.70616	5.47558	5.47008	5.48778
RNF175__chr4	3.83544	3.67084	2.8463	3.89277	1.4435	0.00628651	1.94245	2.37258	1.66176	0.765921	1.76964	1.90281
GADD45GIP1__chr19	6.42767	6.2757	6.06131	6.04805	6.51389	6.63564	6.53203	6.66232	6.05408	5.85338	6.09157	5.60325
DTD2__chr14	5.34563	5.21516	5.90684	5.98793	4.97955	4.59125	5.1489	5.3512	5.11022	4.75081	4.93957	5.07274
MYO10__chr5	7.90087	7.91031	8.31041	7.94113	7.33589	7.10957	7.96311	7.4811	7.02809	7.08484	6.62763	6.51752
GABBR2__chr9	2.03897	1.30827	1.80448	0.433339	2.2915	1.81364	1.70144	1.28511	3.16426	3.57328	2.76964	3.48778
KCTD8__chr4	2.11297	1.96035	3.14328	4.0183	0.706535	1.59125	2.76557	3.21585	0.398729	0.988313	1.76964	3.22474
RAD51__chr15	4.54593	4.14477	3.94584	3.75527	3.51389	3.81364	3.76557	3.94333	1.24673	2.64039	2.76964	0.902813
GATAD2A__chr19	6.03897	6.09337	5.73939	5.43334	5.86304	6.09375	5.92851	6.04	5.56062	5.40978	5.09157	4.99028
LIN7C__chr11	6.31068	6.09337	6.40702	6.47773	6.07577	6.29169	6.225	6.25666	6.89378	6.86746	6.577	7.3122
MYT1__chr20	4.61122	4.65066	5.3965	5.68127	4.2915	4.25421	5.84192	5.48969	6.83169	7.1176	6.47008	6.88009
IMMP2L__chr7	2.25047	2.67084	3.03895	2.43334	3.4435	2.91318	3.56394	3.99936	1.39873	2.08785	1.76964	2.48778
H3F3B__chr17	9.18121	9.20482	9.453	9.42769	9.48352	9.49111	9.58852	9.40211	9.64761	9.8053	9.70628	9.6776
SOGA1__chr20	5.93059	5.70059	5.64775	5.68127	5.38836	5.15603	5.66828	5.49457	6.73144	6.78087	6.09157	6.26036
PDE4A__chr19	0.598398	0.0858784	0.0389457	0.433339	1.92893	1.59125	0.826974	1.192	1.39873	2.35088	1.76964	2.48778
UGDH__chr4	7.78822	7.74171	7.36448	7.27883	7.64905	7.64291	7.35054	7.35255	7.12937	6.99153	7.19591	6.85701
SLC2A1__chr1	5.60482	4.94386	5.32435	5.38754	4.92893	4.43255	4.76557	4.65144	4.51974	4.20333	4.76964	3.71017
ZRANB2__chr1	6.61441	6.4896	6.40702	6.66216	6.61343	6.28241	6.69734	6.35926	6.29597	5.75081	6.01757	5.94721
UBE2A__chrX	5.4984	5.44343	5.54991	5.68127	6.09885	5.98357	5.74981	5.82815	4.88416	5.19219	5.22908	5.42637
CCDC64__chr12	0.598398	1.08588	1.88694	1.43334	1.70654	0.591249	1.56394	1.28511	2.46912	2.08785	2.76964	2.90281
SEMA6D__chr15	3.40575	3.67084	3.94584	4.34023	2.82201	3.00629	3.24201	2.8397	4.53623	4.44775	4.35461	3.90281
LOC642852__chr21	2.92033	3.2558	4.28687	4.34023	3.76543	3.32821	4.26438	4.22763	4.80472	5.09982	4.76964	5.8097
PILRB__chr7	5.15736	4.87596	5.06575	5.68127	4.25086	4.46572	4.32947	4.68599	4.45184	4.33071	3.76964	4.07274
MED8__chr1	4.55923	4.11563	3.9838	4.0183	5.00422	4.36384	4.43184	4.2738	4.031	3.76592	4.09157	3.71017
EMC7__chr15	5.39837	5.78632	5.71137	5.71874	6.3977	6.52199	6.25882	6.20695	6.04834	5.75081	5.577	5.76079
MRPS15__chr1	6.54927	6.32746	6.01164	6.41062	6.581	6.63564	6.38667	6.25666	5.98969	5.87445	5.93957	5.71017
AHCYL1__chr1	6.67369	7.06316	6.97911	6.9725	5.91599	6.03971	6.42689	6.37523	6.11572	6.42889	6.47008	5.85701
RARS__chr5	6.09938	6.28882	6.13065	6.34023	6.43446	6.621	6.29186	6.31025	6.05408	5.73555	5.577	5.90281
CDKN2B__chr9	1.37601	1.67084	1.17645	2.0183	3.64513	3.46572	3.19621	3.1431	3.32473	1.98831	1.76964	1.90281
N4BP1__chr16	4.84633	4.92718	4.5372	4.89277	4.92893	4.36384	4.39176	4.192	5.27647	5.57328	5.76964	5.60325
SUMO2__chr17	8.85579	8.72008	8.7057	8.73712	8.78513	8.83601	8.75278	8.68972	8.95408	8.91058	8.94955	8.9581
LOC100506710__chr9	5.44209	5.58838	5.6828	5.29132	5.09885	4.86427	5.37129	5.48969	5.85159	5.70452	6.29321	6.07274
DNM3__chr1	3.62393	3.58838	5.33907	5.24069	4.2915	3.09375	5.37129	5.58889	6.42553	6.66477	6.4135	6.9689
ST5__chr11	5.08566	4.85847	5.30198	5.47773	5.35039	5.41568	5.76557	5.61154	4.67671	4.6239	4.577	4.07274
EIF2C2__chr8	2.4349	2.30827	2.41746	2.43334	3.20904	3.17621	2.70144	2.53304	2.0768	2.42889	1.76964	1.90281
RPS11__chr19	10.7434	10.8166	10.8104	10.6391	10.745	10.6393	10.8482	10.7056	10.9301	11.0471	11.4332	11.1304
CAMK1__chr3	4.64902	4.58838	4.64775	4.9569	4.67616	4.52985	5.18453	5.08601	3.80472	3.93585	4.577	4.48778
CBX1__chr17	7.02226	6.66079	7.07457	6.82566	6.62142	6.56853	6.85672	6.78097	6.98068	7.18658	7.52453	7.50273
ANKRD13B__chr17	4.2829	3.67084	4.64775	4.60326	3.4435	3.25421	4.04937	3.89982	4.5846	4.83917	5.09157	4.48778
ASPM__chr1	5.14859	5.02448	5.17645	5.56262	4.61343	4.76117	4.37129	4.192	3.56865	3.53851	4.09157	2.48778
MORN4__chr10	5.14859	5.3589	5.38235	5.34023	5.18766	5.27307	5.44168	5.48479	6.05408	6.14096	5.577	6.18821
COX5A__chr15	7.60161	7.56161	7.41572	7.42202	7.91599	7.73421	7.71369	7.67098	7.62562	7.60092	7.577	7.6577
TSEN34__chr19	7.32047	7.14477	7.17645	7.26623	7.24569	7.19611	7.26715	7.29214	6.80812	6.77715	6.22908	6.88009
PNISR__chr6	8.45904	8.25747	8.52919	8.61821	7.84949	7.50214	7.66828	7.78097	7.84498	7.94914	7.22908	7.69723
C18orf54__chr18	4.81341	4.45511	4.7723	4.34023	3.581	4.13557	3.85672	3.88503	3.0768	3.13515	3.76964	3.71017
PPM1E__chr17	3.76832	3.85847	4.22481	4.24069	3.92893	3.70673	4.39176	3.79291	4.32473	4.6239	4.76964	4.60325
PTPRK__chr6	4.3609	4.08588	3.82554	3.0183	4.47912	4.49814	3.24201	3.21585	3.85816	3.08785	1.76964	1.90281
PKIG__chr20	6.27486	6.34012	6.23272	6.04805	6.45249	6.20596	6.19621	6.2509	6.90969	7.1264	6.67654	6.42637
PRMT3__chr11	2.4349	2.30827	2.30198	2.0183	2.2915	2.70673	2.41194	2.04	1.98369	1.76592	1.76964	0.902813
IMP4__chr2	5.64279	5.85847	5.61184	5.82566	6.45249	6.34614	6.39176	6.39364	5.37142	5.23624	6.01757	5.54667
YBX1__chr1	10.3141	10.2708	10.3029	10.2278	10.3015	10.483	10.4182	10.4425	10.0995	10.24	10.2167	10.2089
BMPR1A__chr10	5.33794	4.87596	5.10072	5.29132	4.84949	5.05068	4.52741	4.45504	4.50307	4.44775	4.09157	4.07274
ATRNL1__chr10	4.21731	4.11563	4.7723	4.24069	3.581	3.46572	4.21929	4.21585	4.73501	4.85338	5.67654	4.48778
RBM4B__chr11	5.57895	5.33381	5.76687	5.75527	5.35039	5.07238	5.68495	5.30192	5.85159	5.96232	6.01757	6.4574
HJURP__chr2	5.4984	5.2558	5.31693	4.9569	4.95446	4.3986	4.96993	4.63384	3.60036	4.20333	2.76964	1.90281
NUP155__chr5	2.54593	3.08588	2.575	2.0183	2.70654	3.70673	3.28641	3.118	2.16426	2.57328	1.76964	0.902813
CORO1B__chr11	6.2215	6.30182	6.1641	6.24069	6.41619	6.41568	6.29186	6.28793	6.1375	6.04514	6.16196	5.99028
TMPO-AS1__chr12	4.99072	5.38356	4.58738	4.43334	4.16597	3.86427	4.21929	3.94333	3.12119	3.39041	3.76964	1.90281
IGLON5__chr19	2.37601	1.67084	3.00242	2.75527	1.12157	-0.993713	1.82697	2.37258	3.60036	3.18096	3.35461	4.22474
PPP3CB__chr10	6.02466	5.4782	6.17234	6.13378	5.73628	5.59125	6.28641	6.03666	6.99566	7.0788	6.62763	6.92518
MARCKSL1__chr1	10.0622	10.1188	10.1425	10.079	9.76362	9.69104	10.1679	9.93863	10.3503	10.4292	10.3658	10.3354
ELAVL2__chr9	4.54593	4.38356	4.15996	4.0183	4.97955	4.81364	4.84192	4.45504	5.6237	5.52081	4.577	5.15074
MEGF9__chr9	2.64902	2.40781	2.96495	3.24069	2.92893	2.46572	2.32947	2.87008	3.43435	3.73555	3.35461	3.90281
NT5C__chr17	4.39096	4.67084	4.24058	4.75527	4.73628	4.09375	4.87137	4.56124	3.50307	3.64039	2.76964	2.90281
STMN3__chr20	11.1241	10.9159	10.7274	10.6895	11.2027	10.81	10.8398	10.7135	11.3648	11.4007	11.008	11.1171
LINC00461__chr5	6.65832	6.43165	8.01737	7.90907	5.794	5.6062	6.59074	6.46999	6.7668	6.70059	7.01757	7.26036
PHC3__chr3	4.01986	4.40781	4.37523	4.5208	4.4435	4.05068	4.73386	4.71974	5.05408	4.64039	5.22908	5.48778
MID1IP1__chrX	5.61122	5.38356	5.32435	5.13378	5.20904	5.21574	5.2078	5.12432	4.53623	4.48474	4.09157	2.90281
EPM2AIP1__chr3	8.12308	7.88246	8.32157	8.69073	8.11875	7.83918	8.20635	8.01133	8.57565	8.60197	8.84646	8.79763
APPL2__chr12	6.10393	5.83183	6.54357	6.2147	4.97955	5.21574	5.59074	5.57513	6.11572	5.88832	5.85711	6.07274
IER2__chr19	4.01986	3.99277	3.86676	3.0183	5.16597	5.17621	4.19621	4.04	4.05408	4.03894	4.09157	2.90281
KIAA0226__chr3	5.11297	5.30827	5.5372	5.38754	5.05231	5.13557	5.35054	4.90717	5.69885	5.90206	5.67654	5.48778
PARPBP__chr12	3.5724	3.3589	3.30198	2.43334	1.92893	2.81364	2.24201	2.4144	1.77724	2.26842	1.76964	0.902813
NAV1__chr1	6.58221	6.43165	7.37523	7.26623	6.62937	6.30091	7.37387	6.96107	7.66176	7.65872	7.93957	7.51752
C7orf50__chr7	6.75104	6.72492	6.18462	6.07719	7.256	7.11481	7.21929	7.1905	6.54032	6.70452	6.577	6.57524
TAF9__chr5	6.65832	6.4667	6.43469	6.58309	7.00422	6.95465	7.0168	6.83394	6.72785	6.73555	6.62763	6.90281
SSFA2__chr2	3.21731	3.45511	4.31693	4.43334	2.92893	2.32821	3.66828	3.118	1.39873	2.18096	1.76964	2.90281
EBF4__chr20	3.11297	3.08588	3.6943	3.60326	1.92893	1.00629	2.48994	2.77697	3.39873	3.08785	3.35461	3.22474
PIK3C2A__chr11	5.11297	5.20136	5.12641	5.13378	4.97955	5.25421	5.11238	4.99247	4.69151	4.60722	4.93957	4.71017
RHBDF1__chr16	5.84633	5.64047	5.4918	6.0183	6.43446	5.96048	5.11238	5.63384	5.29597	4.79567	3.35461	3.71017
PIANP__chr12	7.1242	7.31149	7.30198	7.07719	6.60539	6.65734	7.21929	6.83778	8.0669	7.79751	7.52453	7.8915
MTIF2__chr2	4.76832	4.4782	3.9838	4.0183	4.47912	4.70673	4.37129	4.30748	4.05408	3.82481	2.76964	2.48778
UBE2S__chr19	7.45993	7.69321	7.33173	7.09155	7.99502	7.98643	7.92501	8.03582	7.23162	7.14096	7.44207	7.36224
ZNF2__chr2	1.87851	1.50092	1.41746	1.43334	1.12157	0.00628651	0.563939	1.192	1.98369	1.98831	1.76964	1.90281
NRM__chr6	7.04607	6.99677	6.83596	6.36408	6.87646	6.84549	6.70144	6.3047	6.66552	6.46636	6.67654	5.85701
CHST11__chr12	4.5724	4.91031	4.80448	4.34023	4.07577	4.00629	5.02337	4.56124	5.30562	5.47558	5.76964	6.11227
EEF2__chr19	9.66679	9.61075	9.66319	9.49673	9.68572	9.60154	9.8166	9.93549	10.2811	10.2584	10.0317	10.0475
CYSTM1__chr5	4.5724	4.6302	3.82554	4.24069	5.87646	5.72053	5.02337	4.80868	4.55253	4.73555	4.09157	4.8097
ASB8__chr12	4.16608	3.82284	4.36087	3.89277	3.70654	3.91318	4.02337	3.98555	4.66176	5.03894	4.577	4.71017
CHMP5__chr9	6.13089	6.07834	6.1968	6.07719	6.50528	6.44091	6.33477	6.57052	6.44749	6.45242	6.67654	6.85701
PCDH18__chr4	3.79104	3.6302	3.64775	3.0183	3.12157	3.59125	2.56394	2.53304	2.60036	2.57328	2.76964	1.90281
MBNL2__chr13	4.40575	4.69074	4.33173	4.0183	5.3695	4.98357	4.19621	4.80868	3.95944	3.73555	1.76964	2.90281
WDR47__chr1	2.11297	1.82284	3.07457	3.60326	2.82201	2.46572	3.19621	3.04	3.80472	4.53851	4.35461	4.36224
ATP6V0B__chr1	7.08796	7.01267	7.25035	6.92519	7.75093	7.67517	7.59516	7.50307	7.82331	7.75081	7.49756	8.06268
KBTBD6__chr13	4.46347	4.67084	4.5372	4.9569	4.33103	3.59125	4.56394	4.40406	5.08803	5.15824	5.22908	5.42637
DDX17__chr22	8.97033	8.89323	9.02763	9.03697	8.3695	8.31463	8.72683	8.50731	8.94948	8.9541	8.74692	9.07274
C14orf169__chr14	4.01986	3.6302	3.9838	4.34023	3.581	3.70673	3.70144	3.82427	3.46912	2.98831	2.76964	2.90281
GCN1L1__chr12	4.39096	4.02448	4.33173	4.13378	4.25086	4.05068	4.63433	4.31854	3.95944	3.79567	4.09157	3.90281
COMMD4__chr15	5.23399	5.34641	4.89693	4.82566	5.14394	4.49814	4.96993	4.64267	4.22655	4.1117	4.09157	2.90281
MYL6__chr12	10.1034	10.1253	9.78142	10.1966	10.5624	10.5056	10.3225	10.5256	9.94253	9.82887	10.0961	9.92518
TBCC__chr6	4.25047	4.22884	4.37523	4.5208	4.40698	4.78765	4.39176	4.48479	4.64666	4.97537	4.93957	4.99028
XBP1__chr22	3.83544	3.96035	3.47191	3.43334	4.33103	4.49814	4.74981	4.37258	3.50307	3.13515	1.76964	2.48778
ANKRD40__chr17	5.76832	5.7677	5.66538	5.68127	6.04044	5.9488	5.43184	5.37787	5.24673	5.21438	5.22908	4.8097
ZNF441__chr19	0.791043	1.08588	1.41746	2.43334	1.70654	1.32821	2.24201	2.09247	2.46912	3.35088	4.93957	3.48778
ZC3H14__chr14	5.72768	5.6302	5.4105	5.64279	5.25086	5.44923	5.0875	5.0533	4.93478	5.39041	4.35461	4.60325
ALG3__chr3	6.77688	6.83183	6.23665	6.10576	6.78691	7.12523	6.97333	7.02321	6.38058	6.23081	5.85711	5.48778
EIF3D__chr22	6.56583	6.62504	6.23272	6.47773	6.96078	6.79419	6.52741	6.70086	6.24673	6.42413	6.16196	5.8097
RABEPK__chr9	4.88907	4.85847	5.04793	4.82566	5.69143	5.49814	5.51814	5.77697	5.38058	5.33071	5.47008	4.90281
FAM214B__chr9	4.4349	4.52328	4.24058	4.24069	4.92893	4.81364	4.74981	4.71138	5.00754	5.22535	5.47008	4.71017
AHNAK__chr11	7.08336	6.89752	6.87436	7.09155	7.59325	7.75112	6.63433	7.31991	6.48194	6.05748	6.01757	5.36224
GINS1__chr20	4.73356	5.0555	4.89693	4.82566	4.51389	4.21574	4.76557	5.01982	2.88416	3.08785	3.35461	4.48778
NRIP3__chr11	0.791043	1.08588	2.30198	0.433339	3.2915	2.81364	2.88587	2.71138	2.83169	2.42889	2.76964	2.90281
CDC45__chr22	4.77973	4.4782	4.22481	4.5208	4.16597	3.17621	3.9969	3.87008	2.66176	2.70452	2.76964	0.902813
MOSPD1__chrX	2.96097	2.67084	3.24058	2.75527	4.54784	4.59125	4.17275	3.62496	3.98369	3.50289	3.76964	4.07274
CDC23__chr5	5.2089	5.32109	4.99314	5.34023	5.3695	5.52985	4.85672	4.70297	4.67671	4.57328	3.35461	4.07274
MEA1__chr6	9.598	9.54326	9.35726	9.36998	9.54574	9.19981	9.56112	9.49274	9.00902	9.0636	8.76964	8.98496
PRR13__chr12	5.09482	4.97665	5.01164	4.89277	5.69143	5.76117	5.53663	5.6945	4.99566	4.75081	4.577	3.71017
CSPG5__chr3	3.89957	4.0555	4.12641	4.34023	3.12157	2.17621	3.37129	3.37258	3.53623	3.57328	3.76964	3.90281
TMEM106C__chr12	6.13534	6.14477	6.25618	6.04805	5.64513	5.70673	5.39176	5.63384	5.00754	5.23624	5.577	5.60325
WARS__chr14	5.9357	6.16625	5.72264	5.29132	6.43446	6.56088	6.50411	6.64925	5.98969	5.98186	5.577	5.60325
GYG1__chr3	3.87851	4.20136	3.54991	3.43334	3.97955	4.70673	4.12465	4.60704	3.24673	2.26842	2.76964	1.90281
NUDT19__chr19	5.09482	4.91031	5.18462	5.43334	5.09885	4.59125	5.09999	5.16163	4.87122	4.57328	4.93957	5.07274
RILPL2__chr12	4.76832	4.4782	4.07457	4.0183	4.07577	3.76117	4.28641	4.3404	2.83169	2.98831	1.76964	3.22474
STT3A__chr11	5.42767	5.68083	5.32435	5.34023	5.16597	5.6645	5.41194	5.61603	4.55253	5.01385	5.09157	4.48778
RAB33A__chrX	2.87851	3.2558	3.59966	2.75527	3.02846	2.70673	3.52741	3.23931	5.01932	5.54728	4.09157	5.15074
ATCAY__chr19	4.29884	4.22884	5.36807	5.38754	4.4435	3.91318	5.4994	5.3404	6.57665	6.68478	6.01757	6.83355
SLC39A4__chr8	2.83544	2.30827	3.07457	3.75527	3.4435	2.81364	3.41194	3.06647	1.24673	-0.234079	1.76964	2.48778
LIMA1__chr12	4.11297	4.11563	4.10934	5.0183	5.42535	5.59125	4.78117	5.192	4.3622	4.01385	3.35461	3.90281
ZNFX1-AS1__chr20	7.55923	7.64302	7.18666	7.44457	7.97955	7.82007	7.53893	7.60704	7.85323	7.93918	7.70038	7.63073
DDX6__chr11	6.21311	5.99277	5.79917	5.68127	5.53096	5.56088	5.94245	6.09569	6.55253	6.87793	6.76964	7.37855
BACH2__chr6	3.79104	3.6302	4.72824	4.89277	3.02846	3.86427	4.17275	4.3404	5.48619	5.68875	4.93957	6.07274
ZNF135__chr19	1.11297	0.822844	1.96495	2.0183	1.4435	0.591249	2.04937	1.53304	1.88416	2.26842	3.35461	2.48778
PRPF18__chr10	2.3146	2.82284	2.62391	1.43334	3.12157	3.59125	3.63433	3.118	3.0768	3.13515	3.35461	1.90281
MARK3__chr14	6.0005	5.4667	6.07016	6.38754	5.90293	5.621	5.9902	5.89614	6.28625	6.32562	6.62763	6.63073
ABHD10__chr3	5.55259	5.18742	5.59353	5.29132	4.95446	5.23511	5.63433	5.43486	5.74214	5.81032	6.22908	5.90281
CFL2__chr14	8.19192	8.25079	8.05798	8.23424	8.6353	8.72225	8.41068	8.45942	7.98369	7.92411	8.21259	8.00084
FAM65B__chr6	4.46347	4.38356	5.5372	4.9569	4.95446	4.83918	5.81944	5.54721	6.23667	6.40013	5.93957	7.09264
MT-RNR1__chrM	12.8125	12.7858	13.105	13.3438	12.9462	12.6756	13.3004	13.3049	13.2791	13.0829	13.5233	13.4769
MT-RNR2__chrM	15.3593	15.2892	15.6868	15.8923	15.4699	15.3437	15.7525	15.5727	15.7725	15.8167	15.9948	16.0788
RMI2__chr16	6.61759	6.1944	5.83076	5.07719	4.95446	4.70673	4.92851	4.99936	4.56865	4.01385	2.76964	4.07274
SMPD3__chr16	2.18336	1.96035	3.96495	3.75527	3.70654	3.32821	4.09999	3.97161	5.98369	6.17531	5.22908	5.42637
CTNNB1__chr3	6.61122	6.91454	6.68568	6.84273	6.4435	6.58372	6.42192	6.43232	6.42553	6.0697	5.85711	5.8097
EIF2S3__chrX	8.08451	8.20482	7.93619	7.9725	8.38367	8.36823	8.29458	8.20472	8.095	8.13806	8.17904	8.07274
NCAPH2__chr22	6.33794	6.0323	6.20083	5.98793	5.67616	5.3986	5.96311	5.57052	5.916	5.83917	5.93957	5.54667
MDH2__chr7	6.50872	6.2757	6.23665	6.0183	6.84267	6.84549	6.77339	6.72806	6.37601	6.52969	6.35461	6.57524
C4orf27__chr4	5.82447	6.09337	5.84114	6.04805	5.38836	5.31007	5.43184	5.55658	5.17483	5.42889	5.67654	5.76079
ABCC5__chr3	4.03897	3.74884	4.27161	4.5208	3.4435	3.81364	3.45146	3.4144	4.38058	4.26842	4.577	4.8097
TMEM69__chr1	5.34563	5.30827	5.26391	5.07719	5.53096	5.63564	5.57293	5.32951	4.94717	5.25777	5.09157	4.36224
KPNA3__chr13	4.84633	4.85847	4.59966	4.89277	4.4435	4.43255	4.63433	4.77697	4.88416	5.02645	4.93957	5.22474
STRAP__chr12	6.44568	6.55076	6.36807	6.31598	6.84949	6.69279	6.64715	6.58203	6.53213	6.53411	6.22908	6.42637
MRFAP1__chr4	8.32632	8.34327	8.47524	8.37585	8.60941	8.52985	8.66828	8.66178	8.3008	8.26178	7.9791	8.12198
BMPR2__chr2	4.4204	4.20136	4.87689	4.0183	4.64513	4.49814	4.59956	4.76085	5.18533	4.8814	5.67654	5.48778
CAMSAP1__chr9	5.23399	4.92718	5.43812	5.07719	5.75093	5.09375	5.59074	5.47494	6.04258	6.1117	6.22908	5.54667
ZNF519__chr18	3.64902	3.58838	3.17645	3.24069	3.97955	3.70673	3.28641	3.5519	2.93478	3.42889	2.76964	2.90281
WHSC1__chr4	7.51214	7.44343	7.39474	7.56262	7.05821	6.74775	7.17865	7.1021	6.99268	7.05748	6.93957	7.27785
TRAM1__chr8	6.65213	6.72008	6.43812	6.64279	7.01639	6.82647	6.66828	6.66015	5.89698	5.83201	6.35461	5.48778
TTK__chr6	4.03897	3.96035	3.80448	3.60326	3.581	3.91318	3.1489	3.04	1.0768	2.64039	2.76964	0.902813
EVI5L__chr19	3.87851	3.82284	4.4852	3.89277	3.82201	3.65014	3.9969	4.07953	5.20608	5.38063	4.577	5.22474
SETDB2__chr13	2.4349	2.50092	2.92647	2.75527	1.70654	2.17621	2.82697	2.49457	2.83169	2.76592	3.35461	2.90281
LRRN3__chr7	2.18336	2.30827	4.0208	3.89277	3.20904	2.46572	4.02337	4.40406	3.83169	4.03894	4.577	5.07274
PSD2__chr5	-0.623995	-1.49908	1.62391	1.43334	0.706535	-0.993713	1.24201	1.28511	3.0768	3.35088	2.76964	3.71017
KIF18B__chr17	3.83544	3.71037	3.41746	3.24069	3.3695	2.59125	3.28641	3.06647	1.77724	1.8814	2.76964	0.902813
ADAMTS10__chr19	2.83544	0.822844	2.47191	2.43334	2.70654	1.59125	2.32947	1.28511	4.09917	3.67281	3.76964	3.22474
SEMA3C__chr7	4.11297	4.3589	4.33173	4.5208	4.581	4.59125	3.66828	3.4144	5.8777	5.65669	4.93957	5.48778
S100A11__chr1	7.32437	7.33064	7.31134	7.29132	8.16323	8.51804	8.06379	8.17538	7.88093	7.20055	6.93957	6.71017
TOMM40__chr19	5.9357	5.89323	5.76141	5.71874	6.581	6.17621	6.5774	6.38051	5.83169	6.00114	5.577	5.90281
MRPL17__chr11	5.39837	4.97665	4.78311	5.18823	5.27132	5.3986	5.1489	4.99936	4.70616	4.48474	3.35461	3.48778
LUC7L3__chr17	7.62393	7.64302	7.73522	7.89277	7.19304	7.45337	7.35054	7.39494	7.65612	7.80484	8.07343	7.69723
STARD7__chr2	7.26678	7.18742	7.08771	6.87628	6.77262	6.65014	6.84934	6.83586	6.70616	6.57756	6.4135	6.63073
TUFM__chr16	7.7854	7.55891	7.25811	7.42202	7.26112	7.36384	7.5088	7.43105	7.11846	6.91567	6.62763	6.60325
WDR82__chr3	7.51385	7.3927	7.68712	7.62316	7.3695	7.17119	7.89486	7.68706	8.04403	7.89004	7.9791	8.26036
POLD2__chr7	5.4349	5.73932	5.35364	5.29132	5.86304	5.43255	5.78117	5.75272	5.06549	4.79567	4.09157	4.71017
SYNJ1__chr21	2.74524	2.40781	2.76141	3.60326	2.2915	1.81364	2.48994	2.32951	3.20608	3.50289	4.577	3.71017
SP1__chr12	6.57568	6.44928	6.5966	6.43334	6.16597	6.23511	6.05579	5.91811	5.95332	5.95575	5.09157	5.07274
SRPRB__chr3	4.58546	4.38356	3.92647	4.0183	4.92893	4.73421	4.52741	4.71138	4.00754	3.70452	4.09157	3.22474
GGPS1__chr1	6.06717	6.12297	6.12216	5.89277	6.00422	5.96048	6.225	6.13686	6.55658	6.53411	6.4135	6.8097
RAB21__chr12	4.4204	4.43165	4.88694	4.60326	5.00422	5.27307	5.02337	4.95754	4.34359	4.40978	4.76964	4.22474
C16orf45__chr16	7.29487	7.22202	7.78848	7.70013	7.1272	6.74775	7.75771	7.52471	8.32828	8.32944	8.03643	8.48778
PAK1__chr11	4.81341	4.96035	5.01164	4.68127	4.64513	4.05068	4.5088	4.29634	5.16426	5.49384	5.09157	5.15074
REEP3__chr10	4.95091	4.65066	4.91669	5.38754	5.00422	5.11481	4.73386	4.90717	4.43435	3.96232	3.35461	3.48778
FAM49B__chr8	5.9858	5.70059	5.96019	6.04805	6.06409	5.69279	5.88587	5.64706	6.32947	6.39528	6.52453	6.18821
YIPF3__chr6	5.82996	5.91031	5.80448	5.43334	5.91599	5.91318	6.08121	5.9786	6.49465	6.12933	6.52453	6.18821
LINC00478__chr21	4.29884	4.74884	4.24058	4.60326	4.40698	4.36384	4.56394	4.39364	3.85816	3.31024	3.76964	3.22474
BRI3__chr7	7.38163	7.15913	7.20083	7.20152	7.68763	7.90715	7.56394	7.59118	7.94408	7.92579	7.38435	7.8097
ZNF43__chr19	3.85713	4.08588	4.43126	4.34023	3.20904	3.76117	3.63433	3.80868	4.22655	4.03894	4.577	4.22474
SHISA7__chr19	2.87851	2.30827	3.78311	4.75527	2.70654	2.00629	2.82697	2.92897	5.42553	5.38063	4.35461	5.36224
INTS9__chr8	3.49148	3.2558	3.20887	3.24069	2.82201	2.81364	3.09999	2.74455	3.95944	3.42889	3.35461	3.48778
HGSNAT__chr8	6.52575	6.85406	6.6088	6.70013	6.01639	5.92515	5.94245	6.1021	6.61208	6.30508	6.577	6.18821
LYRM2__chr6	6.45638	6.2558	6.14328	5.98793	6.40698	6.34614	6.29186	6.34581	6.00754	5.84629	6.01757	5.48778
RAB13__chr1	5.70991	5.68083	5.71137	5.64279	5.91599	6.1862	5.80425	5.89244	5.67671	5.69666	5.35461	5.36224
SLC29A4__chr7	5.80227	5.68083	5.3965	5.34023	5.18766	5.34614	5.57293	5.192	6.28137	6.40978	5.85711	6.48778
C17orf100__chr17	3.96097	3.6302	4.05687	3.89277	4.07577	3.86427	3.41194	3.45504	4.67671	4.42889	4.577	4.99028
IARS__chr9	6.4984	6.50092	5.85657	6.07719	6.66847	6.36384	6.57293	6.55891	5.90335	5.7432	5.47008	5.94721
RNF41__chr12	5.77404	5.60944	6.11362	6.2147	5.92893	6.02865	6.38667	6.2364	6.658	6.61975	6.4135	6.83355
ELOVL5__chr6	4.94079	5.0555	4.71702	4.68127	4.84949	4.86427	4.66828	4.1431	4.30562	4.31024	3.35461	3.90281
TACO1__chr17	3.2829	3.6302	3.41746	3.60326	3.70654	3.91318	3.59956	3.28511	3.0768	3.22535	2.76964	2.90281
RSU1__chr10	8.50357	8.8047	8.45595	8.61325	9.15224	9.11742	8.8033	9.04833	8.72336	8.53851	8.05505	8.00084
NECAP1__chr12	4.18336	3.85847	4.86676	4.9569	4.54784	4.17621	4.74981	4.61603	5.43435	5.556	5.76964	5.22474
CDC7__chr1	3.40575	2.40781	2.52437	2.43334	2.12157	2.59125	2.48994	1.80868	1.66176	1.18096	1.76964	0.902813
NRARP__chr9	4.95091	4.91031	5.29445	5.5208	3.12157	3.96048	4.3081	4.65144	3.16426	3.18096	1.76964	3.71017
PARP8__chr5	1.5984	1.50092	1.41746	2.75527	-0.878427	1.00629	0.826974	0.744546	2.66176	2.98831	2.76964	2.48778
WDR1__chr4	7.44209	7.71766	7.30386	7.2147	7.87646	7.91618	7.69939	7.84353	7.49676	7.20886	7.22908	6.8097
TEAD2__chr19	6.53588	6.82284	6.39297	6.10576	5.86304	5.67871	5.82697	5.54721	5.08803	4.83917	2.76964	4.36224
RBM14__chr11	6.88644	6.52328	6.66538	6.64279	6.81506	6.89503	6.75771	7.20993	6.28625	6.20333	6.4135	6.4574
CHST14__chr15	5.16608	4.96035	4.78311	5.13378	4.92893	4.67871	4.73386	4.66015	3.74923	3.90888	1.76964	1.90281
MCM10__chr10	4.50529	4.82284	4.47191	4.24069	3.70654	4.05068	3.96993	3.6945	2.83169	2.93585	4.09157	2.90281
PKM__chr15	10.1392	10.1769	9.65513	9.46401	10.1543	10.2923	9.88767	9.97555	9.48513	9.27041	9.49074	9.21115
CLEC2D__chr12	2.37601	2.08588	2.10934	3.24069	1.12157	0.591249	1.56394	1.45504	1.39873	1.35088	1.76964	2.90281
HEBP1__chr12	3.85713	4.14477	3.49838	3.0183	3.97955	3.59125	3.59956	3.66015	3.031	2.82481	1.76964	0.902813
ARL3__chr10	8.74814	8.61205	8.72264	8.59321	8.56452	8.41568	8.78311	8.62719	8.86715	8.75933	8.98881	9.03724
ZBTB34__chr9	3.0005	3.02448	2.8463	3.24069	3.02846	2.59125	2.9969	2.74455	3.43435	3.31024	3.76964	3.90281
GAL3ST4__chr7	3.3146	3.40781	3.92647	3.60326	3.2915	3.17621	4.43184	3.91447	5.57665	5.38063	4.577	5.99028
C8orf58__chr8	4.69793	4.74884	4.83596	5.13378	4.64513	3.91318	4.74981	4.97161	4.09917	3.76592	4.09157	4.60325
DCTD__chr4	6.20043	6.02448	5.82031	5.64279	6.25086	6.41568	6.0875	6.22175	5.31521	5.14674	5.67654	4.48778
PCNT__chr21	5.24225	5.17334	5.3965	5.34023	4.4435	4.76117	5.02337	4.82427	4.84498	4.94914	5.35461	5.48778
SEC61G__chr7	9.45282	9.52051	9.25521	9.20813	10.083	10.1213	9.86635	9.96877	9.56665	9.14168	9.67051	9.39065
GUCY1A2__chr11	1.11297	1.30827	1.71702	1.43334	-0.878427	1.59125	1.41194	1.192	2.32473	2.50289	3.35461	3.71017
ADM__chr11	3.37601	3.6302	3.6943	4.43334	4.67616	5.23511	4.59956	5.43993	4.28625	3.46636	3.76964	4.07274
ALYREF__chr17	6.3302	6.30182	6.27544	5.64279	6.45249	6.23511	6.225	6.35658	5.60036	5.25777	5.76964	5.42637
C1orf43__chr1	8.15955	8.07646	8.13487	8.20813	8.3766	8.55703	8.34004	8.39168	8.35525	8.33451	8.2615	8.42637
PLD6__chr17	-2.20896	-1.49908	-1.28298	0.433339	0.706535	1.59125	2.1489	0.607042	0.398729	1.18096	1.76964	2.48778
RABEP1__chr17	5.17475	5.28228	4.90684	5.29132	5.33103	5.17621	4.98348	5.37787	6.49887	5.59035	5.47008	6.39467
MARCH1__chr4	2.54593	1.96035	2.17645	1.43334	2.4435	1.81364	2.88587	2.60704	3.56865	3.90888	3.35461	3.71017
RPS6KA2__chr6	7.64279	7.74884	7.78445	7.39912	7.11026	7.43255	7.32947	7.48356	8.39421	8.32434	7.89893	7.93624
APBB3__chr5	4.75683	4.71037	5.44494	4.68127	4.70654	4.78765	5.55489	5.01982	6.15895	6.47558	6.01757	5.54667
TSPAN3__chr15	8.44836	8.58173	8.64183	8.75977	8.27639	8.20841	8.53663	8.49335	8.18009	8.12347	7.95947	8.30369
PRDX5__chr11	9.04725	9.30182	9.21985	9.07358	9.1646	9.2327	9.31213	9.34547	9.49887	9.4893	9.88339	10.0061
POLR2L__chr11	8.20678	8.1804	7.75319	7.77319	8.19839	8.17871	8.09999	8.15394	7.36912	7.27372	7.72384	7.27785
ABHD4__chr14	6.13089	6.06316	5.83596	5.82566	6.1328	6.32821	6.02991	6.16163	5.51974	5.22535	3.76964	4.8097
TUT1__chr11	3.72178	4.08588	3.62391	3.89277	3.20904	3.96048	3.66828	3.53304	3.16426	3.53851	3.35461	3.22474
ISL1__chr5	3.87851	3.74884	3.44494	3.0183	3.51389	3.25421	2.70144	2.77697	4.63139	4.57328	3.35461	4.48778
SLC16A9__chr10	5.0005	5.24238	4.83596	4.68127	5.84949	5.25421	5.88587	5.66882	4.32473	4.90888	4.577	4.48778
JUND__chr19	8.0971	8.2203	8.43555	7.89277	7.75457	7.67871	8.05258	7.85212	8.43325	8.49724	8.35461	8.36224
C7orf60__chr7	4.34563	4.17334	4.27161	4.13378	4.02846	4.36384	4.35054	3.62496	4.90969	4.67281	4.93957	4.90281
BAHCC1__chr17	4.4349	4.17334	4.83596	4.82566	4.16597	4.17621	4.76557	4.07953	5.61596	5.40013	5.09157	5.76079
PTGR1__chr9	4.95091	4.89323	4.44494	4.34023	4.40698	4.59125	3.59956	4.26239	4.031	3.60722	3.35461	2.48778
RNF213__chr17	4.83544	4.72973	4.83596	4.75527	4.64513	4.96048	4.82697	4.74455	4.93478	5.18096	5.22908	5.22474
DEK__chr6	5.76832	5.69074	5.59966	5.56262	5.3114	5.07238	5.2307	5.09247	4.30562	4.64039	4.76964	5.15074
RPL24__chr3	8.70243	8.69198	8.4852	8.69073	8.90457	8.77612	8.71673	8.76135	8.43765	8.4836	8.52453	8.3122
SMARCD3__chr7	5.09482	5.3589	4.91669	3.89277	4.581	4.29169	4.68495	4.49457	5.83835	6.0697	5.85711	6.0321
CAPRIN1__chr11	7.5887	7.57506	7.5672	7.55228	7.53943	7.64653	7.80234	7.68065	7.69702	7.83738	7.91939	7.78546
DLG1__chr3	5.72178	5.7677	5.4918	5.5208	5.86304	5.69279	5.56394	5.35658	5.35293	5.38063	4.577	4.99028
RAVER1__chr19	6.08566	6.10825	5.89194	5.75527	5.27132	5.38133	5.53663	5.71557	5.12119	5.25777	4.76964	4.36224
ERF__chr19	2.79104	2.96035	3.10934	2.43334	3.97955	3.09375	3.48994	3.3512	2.24673	2.08785	1.76964	2.48778
NAPA__chr19	5.19192	4.7677	5.10934	4.75527	5.49661	5.19611	5.43184	5.31854	5.93478	5.60722	6.01757	5.07274
ZNF213__chr16	6.06717	6.22884	5.98848	5.82566	5.75093	6.35501	6.11853	6.13686	6.80131	6.8952	6.577	6.32908
RPS6KA6__chrX	3.69793	3.20136	3.07457	3.43334	2.70654	2.59125	2.94245	1.80868	3.85816	3.64039	4.577	4.07274
EEF1A2__chr20	4.54593	4.38356	4.78311	4.82566	4.794	4.621	5.2307	5.24512	5.89058	5.90888	5.47008	5.48778
ZNF436__chr1	5.67979	5.71037	5.99314	6.41062	5.3114	5.43255	5.69322	5.63826	5.40772	5.38063	5.76964	5.76079
BBC3__chr19	3.98087	4.08588	3.86676	3.60326	4.70654	4.83918	4.63433	4.91447	4.24673	4.78087	3.76964	3.90281
CAAP1__chr9	4.90998	4.94386	4.6828	5.0183	5.00422	4.86427	4.81187	4.64267	4.28625	3.64039	4.35461	3.48778
KLHDC8B__chr3	4.94079	4.78632	4.63588	4.43334	4.40698	4.78765	4.35054	4.3512	4.18533	4.37078	3.76964	3.22474
FTH1__chr11	9.96065	9.71463	9.41007	9.43052	10.2051	10.294	10.2275	10.448	10.1616	9.84452	9.87293	10.0702
GPR56__chr16	5.14859	5.32109	5.94584	5.79089	4.95446	4.83918	5.66828	5.61603	6.66926	6.86395	6.29321	6.4574
HNRNPU__chr1	8.74597	8.63406	8.59507	8.65734	8.42991	8.43255	8.53088	8.47494	8.21379	8.26178	7.70038	8.1602
FAM122B__chrX	4.63653	4.8047	3.94584	4.13378	4.40698	4.52985	4.17275	3.64267	3.3622	3.26842	3.76964	2.48778
DNAJC18__chr5	4.3609	4.50092	4.59966	4.34023	4.25086	4.05068	4.91444	4.5519	5.16426	5.33071	5.09157	5.42637
CECR1__chr22	4.85713	5.00871	4.00242	5.07719	4.67616	4.49814	4.0749	4.63384	4.20608	3.85338	3.76964	4.22474
CDCA7L__chr7	4.44925	4.4782	5.44494	5.18823	3.20904	3.25421	4.39176	4.20398	2.77724	2.82481	1.76964	3.48778
FGF13__chrX	5.77973	5.70059	5.76141	6.10576	5.47912	5.09375	5.32947	5.07302	5.85816	5.91567	6.01757	6.54667
PVRL3__chr3	5.45638	5.52328	5.61184	5.71874	5.2915	5.73421	5.34004	5.70297	4.26663	3.64039	4.93957	3.48778
ADSL__chr22	6.3609	6.38356	6.0299	6.07719	6.54784	6.44091	6.45633	6.41697	5.73501	5.68875	6.09157	5.29513
MTHFD2__chr2	5.09482	4.91031	4.22481	5.0183	5.76543	5.67871	4.84192	5.50912	5.031	4.37078	4.09157	3.71017
TUBB__chr6	12.4697	12.3967	12.304	12.2725	12.3269	12.0923	12.2166	12.3143	12.7901	12.7653	12.4198	12.5889
XPR1__chr1	6.32242	6.06316	6.44834	6.54186	6.37896	6.01751	6.42689	6.23931	7.40548	7.54071	6.81404	7.09264
NUTF2__chr16	7.24225	7.64557	7.30386	7.07719	7.62937	8.06968	7.63003	7.55774	6.81151	6.8952	7.29321	6.11227
DPP6__chr7	6.43129	6.08588	6.60271	6.31598	5.02846	4.91318	5.59074	5.5519	6.11022	6.0636	5.85711	6.94721
DPY19L4__chr8	3.94079	3.85847	3.67121	4.5208	3.4435	3.86427	3.24201	3.23931	2.39873	2.98831	2.76964	3.22474
LPPR1__chr9	1.49148	2.30827	4.45848	4.0183	2.4435	2.00629	4.32947	3.80868	4.93478	5.14674	5.22908	5.60325
PDE6D__chr2	7.19831	6.95624	7.31134	7.57289	7.05231	6.59874	7.4539	7.48724	7.49887	7.56466	7.67654	8.25154
DYNC1H1__chr14	6.48104	6.40178	6.55622	6.47773	6.63727	6.67871	7.02665	6.77897	7.23415	7.37818	6.89893	7.50273
C7orf41__chr7	5.67369	5.72973	6.81768	6.24069	5.07577	5.52985	6.78891	6.43232	7.0397	7.0697	7.52453	6.90281
WSB2__chr12	4.62393	4.99277	4.82554	5.34023	5.18766	5.29169	5.1489	5.16776	5.80472	5.52969	6.01757	5.76079
[truncated: 7,656 more rows]
