# Supplementary material for: Quantitative mapping of transcriptome and proteome dynamics during polarization of human iPSC-derived neurons
Source: bioRxiv preprint, doi:10.1101/2020.04.21.052498, version 1 (2020-04-21)
Supplement: Table 3 [file 052498_file09.xlsx]

## Sheet: Tukey_per_Timepoint_pair
Gene_ID	day3/day1_diff	day7/day1_diff	day7/day3_diff	day3/day1_p	day7/day1_p	day7/day3_p	BAdiff	BAp	day3/day1_padj	day7/day1_padj	day7/day3_padj
A1BG__chr19	0.00651496	-0.108344	-0.114859	0.998144	0.62294	0.590401	-0.0461246	0.632656	0.000806622	0.205554	0.228853
A1CF__chr10	0.00234608	-0.55482	-0.557166	0.999946	0.124641	0.123073	-0.0971406	0.633207	2.35123e-05	0.90434	0.909836
A2M-AS1__chr12	0.442779	-0.150365	-0.593144	0.429405	0.895038	0.25206	-0.130287	0.647894	0.367133	0.0481584	0.598495
A2M__chr12	0.000425468	0.749343	0.748917	0.999999	0.254578	0.254895	1.88934	0.00152839	2.44025e-07	0.594179	0.593639
AAAS__chr12	-0.137011	-0.582945	-0.445935	0.75115	0.0456758	0.115445	-0.239884	0.164394	0.124273	1.34031	0.937627
AACS__chr12	-0.436184	-0.513517	-0.0773333	0.378773	0.279716	0.96468	-0.0362885	0.887776	0.42162	0.553283	0.0156167
AADAT__chr4	-0.163799	-0.53804	-0.374241	0.900007	0.377016	0.599088	-0.420776	0.214525	0.0457543	0.42364	0.222509
AAED1__chr9	0.196887	-0.706524	-0.903411	0.813774	0.143476	0.065115	-0.226721	0.413866	0.0894964	0.84322	1.18632
AAGAB__chr15	0.168472	-0.367963	-0.536436	0.799985	0.391199	0.177682	-0.321158	0.180728	0.0969181	0.407602	0.750356
AAK1__chr2	0.108491	0.785146	0.676655	0.846334	0.016032	0.0303863	-0.000120453	0.999419	0.0724582	1.79501	1.51732
AAMDC__chr11	0.551101	-1.17832	-1.72942	0.13626	0.00674167	0.000931869	-0.472947	0.0540436	0.865631	2.17123	3.03065
AAMP__chr2	0.284985	-0.0717734	-0.356758	0.291125	0.908719	0.172559	-0.125398	0.403301	0.53592	0.0415703	0.763063
AAR2__chr20	-0.241997	-0.316936	-0.0749387	0.541358	0.373332	0.937296	-0.358506	0.0899941	0.266515	0.427905	0.0281232
AARD__chr8	-0.273036	-0.319066	-0.04603	0.555771	0.460313	0.981737	-0.389591	0.106408	0.255104	0.336947	0.00800502
AARS2__chr6	-0.0702837	-0.304412	-0.234128	0.97674	0.661873	0.777954	0.201971	0.493676	0.0102209	0.179225	0.109046
AARS__chr16	0.0830979	0.587695	0.504597	0.926835	0.0851503	0.137075	0.0884661	0.643399	0.0329974	1.06981	0.863042
AASDHPPT__chr11	-0.0452187	0.370822	0.41604	0.965515	0.175433	0.127083	0.279802	0.103586	0.015241	0.755888	0.895911
AASDH__chr4	-0.325708	0.403292	0.729001	0.375955	0.248632	0.0401167	0.109837	0.570791	0.424864	0.604443	1.39667
AASS__chr7	-0.492998	-0.618137	-0.125139	0.338354	0.209779	0.920096	0.67214	0.0420498	0.470628	0.678239	0.0361669
AATF__chr17	0.519872	0.0640754	-0.455797	0.188146	0.966596	0.256781	-0.406022	0.101539	0.725504	0.014755	0.590437
AATK__chr17	-0.0104288	-0.39171	-0.381281	0.999598	0.595511	0.610628	-0.723816	0.0614866	0.000174583	0.22511	0.214224
ABAT__chr16	-0.0198373	0.521755	0.541593	0.996081	0.145832	0.130936	-0.134634	0.50913	0.00170538	0.836147	0.88294
ABCA10__chr17	-0.370972	-1.06715	-0.696176	0.774141	0.191979	0.441794	-0.0463697	0.918544	0.11118	0.716747	0.35478
ABCA11P__chr4	-0.258573	-0.85067	-0.592097	0.781982	0.141453	0.330458	0.0259196	0.935976	0.106803	0.849388	0.480884
ABCA12__chr2	-0.267158	0.550215	0.817373	0.685513	0.259952	0.0880685	-0.114439	0.669472	0.163984	0.585107	1.05518
ABCA13__chr7	0.0524183	0.555996	0.503578	0.993079	0.499968	0.559826	0.0228867	0.954064	0.00301609	0.301058	0.251947
ABCA1__chr9	-0.31477	-0.413749	-0.0989788	0.878845	0.802785	0.987057	-0.0147036	0.978571	0.0560877	0.0954007	0.0056579
ABCA2__chr9	0.0119868	0.940132	0.928146	0.997882	0.00671635	0.00714729	-0.135005	0.425028	0.00092099	2.17287	2.14586
ABCA3__chr16	-0.218716	0.663884	0.8826	0.647162	0.0697836	0.0229048	0.0572406	0.777416	0.188987	1.15625	1.64007
ABCA4__chr1	-0.345596	-0.153979	0.191617	0.373867	0.79985	0.712502	-0.103752	0.611593	0.427283	0.0969913	0.147214
ABCA5__chr17	-0.476189	-0.11423	0.361959	0.336105	0.927716	0.507597	0.627091	0.0467565	0.473525	0.0325852	0.294481
ABCA7__chr19	-0.52007	-0.263747	0.256323	0.617048	0.876349	0.882656	-0.447369	0.34356	0.209681	0.057323	0.0542084
ABCA9__chr17	0.428518	1.61237	1.18386	0.609489	0.0229201	0.0759527	0.800567	0.0642319	0.215034	1.63978	1.11946
ABCB10__chr1	-0.0208058	-0.195216	-0.17441	0.999416	0.950299	0.960056	-0.119909	0.82591	0.000253675	0.0221399	0.0177032
ABCB1__chr7	-0.215319	-0.347917	-0.132598	0.797091	0.571924	0.915676	0.127635	0.651701	0.098492	0.242662	0.0382582
ABCB5__chr7	-0.235888	0.377773	0.613661	0.876095	0.7204	0.450755	0.173121	0.671699	0.057449	0.142426	0.346059
ABCB6__chr2	0.631382	-0.134557	-0.76594	0.219894	0.915165	0.131749	0.217439	0.454374	0.657787	0.0385004	0.880252
ABCB7__chrX	0.0267315	-0.681237	-0.707968	0.981357	0.00780692	0.006481	-0.369612	0.020229	0.00817277	2.10752	2.18836
ABCB8__chr7	-0.134474	-0.813781	-0.679307	0.985424	0.60974	0.702324	-0.857967	0.248848	0.00637695	0.214856	0.153463
ABCB9__chr12	-0.157562	0.869293	1.02685	0.963767	0.384412	0.282986	-0.206912	0.690877	0.0160281	0.415203	0.548236
ABCC10__chr6	-0.321102	0.0837992	0.404902	0.579397	0.960228	0.437865	-0.186099	0.486936	0.237024	0.0176257	0.35866
ABCC1__chr16	-0.431938	-0.241282	0.190656	0.142169	0.469232	0.6097	-0.381899	0.0514379	0.847194	0.328613	0.214884
ABCC4__chr13	-0.564142	-1.88931	-1.32517	0.48381	0.0150741	0.0637964	-0.995648	0.0383998	0.315325	1.82177	1.1952
ABCC5__chr3	-0.574688	0.345706	0.920394	0.0385438	0.199356	0.00459058	0.215887	0.181821	1.41405	0.70037	2.33813
ABCC6P1__chr16	-0.115828	-0.107628	0.00819984	0.885531	0.90009	0.999378	-0.0891889	0.670217	0.0527961	0.0457139	0.000270167
ABCC8__chr11	0.146347	0.0169579	-0.129389	0.945008	0.999234	0.95666	-0.436652	0.284078	0.0245647	0.000333008	0.0192422
ABCC9__chr12	-0.115716	-1.49877	-1.38305	0.916606	0.00490614	0.00727369	0.131874	0.596474	0.0378173	2.30926	2.13825
ABCD1__chrX	0.579681	0.412576	-0.167105	0.456965	0.655252	0.928968	-1.33265	0.0114579	0.340117	0.183592	0.0319992
ABCD2__chr12	0.344385	0.0225956	-0.32179	0.130189	0.987449	0.157946	0.0637725	0.619223	0.885424	0.00548529	0.801491
ABCD3__chr1	-0.320299	-0.643871	-0.323572	0.345559	0.0502687	0.339303	0.25331	0.190321	0.461478	1.2987	0.469412
ABCD4__chr14	-0.356025	-0.565583	-0.209558	0.0588735	0.0082265	0.27058	0.091411	0.391446	1.23008	2.08478	0.567705
ABCE1__chr4	0.120466	-0.934014	-1.05448	0.753967	0.0030832	0.00163986	0.065261	0.64381	0.122648	2.511	2.78519
ABCF1__chr6	-0.0668888	-0.525297	-0.458408	0.914894	0.0436777	0.072148	-0.239531	0.126218	0.0386294	1.35974	1.14178
ABCF2__chr7	0.143352	0.0529325	-0.0904193	0.879543	0.982321	0.949572	-0.281284	0.285464	0.0557429	0.00774639	0.022472
ABCF3__chr3	0.187223	-0.477715	-0.664938	0.239062	0.00821056	0.001541	0.0196749	0.821737	0.62149	2.08563	2.8122
ABCG1__chr21	-0.644487	0.496742	1.14123	0.509396	0.657624	0.174992	-0.0577455	0.90178	0.292944	0.182023	0.756982
ABCG4__chr11	-0.809165	-0.417267	0.391897	0.528902	0.83247	0.850161	0.498675	0.424065	0.276625	0.0796315	0.0704988
ABHD10__chr3	-0.0890507	0.504815	0.593865	0.748606	0.0132551	0.00614144	0.261557	0.036881	0.125747	1.87762	2.21173
ABHD11__chr7	0.318469	-0.346558	-0.665026	0.745943	0.70891	0.330662	-0.466436	0.228311	0.127295	0.149409	0.480616
ABHD12__chr20	0.104604	-0.00890625	-0.11351	0.523862	0.994773	0.473414	0.305426	0.00638038	0.280783	0.00227603	0.324758
ABHD13__chr13	0.0547524	-0.628305	-0.683057	0.967959	0.0700984	0.0517415	-0.015217	0.936583	0.0141431	1.15429	1.28616
ABHD14A__chr3	0.189216	0.5134	0.324184	0.694616	0.13576	0.38199	-0.154058	0.43483	0.158255	0.867228	0.417948
ABHD14B__chr3	-0.033954	-1.26609	-1.23214	0.993192	0.0141367	0.0159798	-0.367404	0.190392	0.00296673	1.84965	1.79643
ABHD15__chr17	-0.312051	-1.19326	-0.881204	0.775766	0.0840941	0.203221	-0.142368	0.711689	0.110269	1.07523	0.692032
ABHD16A__chr6	-0.111896	-0.553192	-0.441296	0.83801	0.0662328	0.137404	-0.189199	0.278828	0.0767505	1.17893	0.862002
ABHD1__chr2	0.339932	0.0335454	-0.306387	0.525473	0.993024	0.586843	-0.289006	0.279091	0.27945	0.00304041	0.231478
ABHD2__chr15	0.196892	0.329501	0.132609	0.164296	0.0276987	0.384197	0.0472796	0.554669	0.784373	1.55754	0.415446
ABHD3__chr18	-0.35512	-0.936443	-0.581324	0.750635	0.205555	0.490066	0.562167	0.201688	0.124571	0.687071	0.309746
ABHD4__chr14	0.196241	-1.10039	-1.29663	0.747625	0.0137816	0.00635193	-0.478689	0.0677177	0.126316	1.8607	2.19709
ABHD5__chr3	0.342521	0.35945	0.0169297	0.513613	0.483814	0.998174	-0.0629669	0.80186	0.289364	0.315322	0.000793702
ABHD6__chr3	-0.419585	0.81772	1.2373	0.0428251	0.00192628	0.000200067	0.440272	0.00631661	1.3683	2.71528	3.69882
ABHD8__chr19	-0.272234	0.371453	0.643686	0.493033	0.299858	0.0657173	0.263477	0.203244	0.307124	0.523085	1.18232
ABI1__chr10	0.0470074	0.346938	0.29993	0.939787	0.103348	0.158948	0.0140194	0.905936	0.0269705	0.9857	0.798745
ABI2__chr2	-0.155064	0.17236	0.327424	0.402213	0.336304	0.0586533	0.0544408	0.571357	0.395544	0.473268	1.23171
ABL1__chr9	-0.140682	-0.0101918	0.13049	0.688146	0.99791	0.723001	0.00910483	0.948446	0.16232	0.000908546	0.140861
ABL2__chr1	0.248998	0.407629	0.15863	0.327608	0.0934536	0.60355	-0.0784722	0.566849	0.484645	1.0294	0.219286
ABLIM1__chr10	0.590539	0.483855	-0.106684	0.160838	0.261452	0.921707	-0.101019	0.669125	0.793611	0.582609	0.0354072
ABLIM2__chr4	-0.0590012	0.92703	0.986032	0.987742	0.123211	0.101787	-0.34722	0.321973	0.00535641	0.909349	0.992308
ABLIM3__chr5	0.126522	1.38552	1.259	0.864202	0.00302975	0.00491338	0.136671	0.516387	0.0633849	2.51859	2.30862
ABRACL__chr6	0.281419	0.33676	0.0553409	0.470474	0.357666	0.967468	-0.272812	0.18861	0.327464	0.446522	0.0143632
ABR__chr17	-0.34851	0.621479	0.969988	0.0964911	0.00938607	0.000970837	0.300414	0.0362459	1.01551	2.02752	3.01285
ABT1__chr6	-0.0703837	-0.11121	-0.0408262	0.961015	0.906394	0.98665	-0.117621	0.601174	0.0172698	0.0426828	0.00583698
ABTB1__chr3	-0.374982	-0.697005	-0.322023	0.466219	0.125602	0.559243	-0.0191875	0.939748	0.33141	0.901005	0.2524
ABTB2__chr11	0.313592	-1.06154	-1.37513	0.576823	0.0280925	0.00883548	0.319894	0.238357	0.238957	1.55141	2.05377
ACAA1__chr3	-0.0951832	-0.246979	-0.151796	0.964631	0.791138	0.913269	0.0757266	0.811079	0.0156387	0.101748	0.0394011
ACAA2__chr18	-0.435183	-1.25046	-0.815276	0.020247	8.25e-05	0.00090303	-0.469341	0.00231066	1.69364	4.0837	3.0443
ACACA__chr17	0.1459	0.70669	0.560791	0.889272	0.139125	0.25043	-0.00228136	0.993168	0.0509654	0.856595	0.601313
ACACB__chr12	-0.790185	-1.27025	-0.480067	0.112474	0.018794	0.366895	-0.270276	0.349088	0.948947	1.72598	0.435458
ACAD10__chr12	0.100104	-0.359628	-0.459732	0.945085	0.518654	0.365014	-0.6789	0.0369534	0.0245293	0.285123	0.437691
ACAD8__chr11	0.0898233	0.0792266	-0.0105967	0.921368	0.938089	0.998845	-0.228636	0.27178	0.0355669	0.0277559	0.000501931
ACAD9__chr3	-0.0197875	-0.57912	-0.559333	0.998647	0.37625	0.398082	-0.350477	0.323568	0.0005882	0.424524	0.400027
ACADM__chr1	-0.44248	-0.319792	0.122689	0.0512783	0.149172	0.691188	-0.0636702	0.610508	1.29007	0.826314	0.160404
ACADSB__chr10	0.0855658	1.07918	0.993612	0.981533	0.127984	0.161866	0.652044	0.136445	0.00809517	0.892846	0.790845
ACADS__chr12	-0.190328	-0.0788661	0.111462	0.876304	0.977163	0.955077	0.141819	0.667342	0.0573453	0.0100329	0.0199614
ACADVL__chr17	-0.415909	-0.458016	-0.0421064	0.062757	0.0437551	0.954412	-0.171906	0.194458	1.20234	1.35897	0.0202639
ACAP1__chr17	0.455165	-0.149537	-0.604702	0.639818	0.949688	0.473555	-0.677926	0.138781	0.193944	0.0224189	0.32463
ACAP2__chr3	-0.120288	-0.927638	-0.80735	0.942455	0.0968369	0.147443	-0.513598	0.135603	0.0257395	1.01396	0.831375
ACAP3__chr1	0.0794553	0.459625	0.38017	0.802286	0.0228048	0.0491325	-0.124421	0.262803	0.0956709	1.64197	1.30863
ACAT1__chr11	-0.101176	-0.315239	-0.214063	0.866231	0.312214	0.551997	0.0479485	0.774363	0.0623661	0.505548	0.258064
ACAT2__chr6	-0.154691	-0.0447462	0.109945	0.80862	0.981788	0.896516	0.523135	0.0396657	0.0922556	0.00798223	0.0474419
ACBD3__chr1	0.233661	0.443093	0.209431	0.505691	0.142619	0.571389	0.1125	0.512527	0.296115	0.845824	0.243068
ACBD4__chr17	0.123916	0.624758	0.500842	0.903939	0.154197	0.26512	0.717978	0.0221197	0.0438608	0.811925	0.576558
ACBD5__chr10	0.0139448	-0.232817	-0.246761	0.999263	0.81987	0.800753	0.249263	0.45388	0.000320186	0.086255	0.0965017
ACBD6__chr1	-0.17884	-0.09982	0.0790201	0.544026	0.815815	0.87878	0.11224	0.427099	0.26438	0.0884082	0.05612
ACBD7__chr10	-0.188093	-0.827213	-0.639121	0.841866	0.102846	0.211515	-0.0998397	0.725026	0.0747569	0.987814	0.674658
ACD__chr16	0.060172	0.271606	0.211434	0.969685	0.564994	0.698322	-0.118876	0.587298	0.0133691	0.247956	0.155944
ACE2__chrX	0.504371	0.824266	0.319896	0.723087	0.450756	0.873905	0.738766	0.206864	0.140809	0.346059	0.0585356
ACER2__chr9	0.0996414	0.255015	0.155374	0.979337	0.874482	0.950743	-0.226735	0.606484	0.00906803	0.058249	0.0219368
ACER3__chr11	0.528415	0.230512	-0.297903	0.209953	0.692252	0.553912	-0.0301609	0.896934	0.677878	0.159736	0.256559
ACHE__chr7	0.224949	1.22948	1.00454	0.844294	0.0497202	0.100706	0.292659	0.40485	0.0735062	1.30347	0.996943
ACIN1__chr14	-0.13185	-0.0233042	0.108545	0.880603	0.995951	0.916882	-0.170758	0.470458	0.0552199	0.00176204	0.0376866
ACLY__chr17	0.0516872	-0.126924	-0.178612	0.909339	0.587909	0.378083	-0.0275408	0.793882	0.0412743	0.23069	0.422413
ACN9__chr7	-0.0399283	-0.348337	-0.308408	0.953666	0.0934256	0.13602	-0.202216	0.117483	0.0206038	1.02953	0.866397
ACO1__chr9	0.57515	0.10241	-0.47274	0.0241279	0.796647	0.0528733	-0.235041	0.115254	1.61748	0.0987339	1.27676
ACO2__chr22	-0.227026	-0.601986	-0.374961	0.888698	0.475388	0.732512	-0.0063016	0.987839	0.0512459	0.322952	0.135185
ACOT11__chr1	0.25288	0.28857	0.03569	0.893031	0.863747	0.997706	0.350085	0.467457	0.0491334	0.0636135	0.000997539
ACOT13__chr6	0.555877	0.257383	-0.298493	0.0785375	0.468384	0.375124	-0.449995	0.036369	1.10492	0.329398	0.425825
ACOT7__chr1	0.649256	0.849661	0.200405	0.0010112	0.000229112	0.15566	-0.123976	0.151367	2.99516	3.63995	0.807823
ACOT8__chr20	-0.0748937	-0.997978	-0.923084	0.987221	0.184018	0.22304	-0.281766	0.507499	0.00558582	0.735141	0.651617
ACOT9__chrX	0.498851	-0.910173	-1.40902	0.122818	0.0120987	0.0013579	-0.0574221	0.751174	0.910739	1.91726	2.86713
ACOX1__chr17	-0.0369615	0.993651	1.03061	0.967217	0.00138291	0.00113762	0.671228	0.00153691	0.014476	2.85921	2.944
ACOX2__chr3	-0.211211	-1.08624	-0.875025	0.841122	0.0597582	0.122709	-0.0694712	0.826429	0.0751412	1.2236	0.911122
ACOX3__chr4	0.214385	-0.114853	-0.329239	0.722224	0.907404	0.488442	-0.544541	0.0492383	0.141328	0.0421995	0.311187
ACP1__chr2	0.14902	-0.534604	-0.683623	0.143469	0.000494578	0.000124338	-0.170952	0.0201251	0.843241	3.30577	3.9054
ACP2__chr11	0.280755	0.390735	0.10998	0.729757	0.558607	0.950651	0.198337	0.526542	0.136822	0.252894	0.0219789
ACP6__chr1	0.245296	-0.488003	-0.733299	0.834862	0.518293	0.267634	-0.0601691	0.867148	0.0783854	0.285424	0.572459
ACPL2__chr3	-0.189299	0.510686	0.699985	0.906984	0.524283	0.327723	-0.416866	0.295998	0.0424002	0.280435	0.484493
ACRBP__chr12	-0.299481	0.187667	0.487148	0.685271	0.857023	0.40241	-0.133925	0.65593	0.164138	0.0670073	0.395331
ACRC__chrX	0.479075	-0.157856	-0.636931	0.645703	0.950481	0.480067	-0.340711	0.451092	0.189967	0.0220566	0.318698
ACSBG1__chr15	-1.73743	-3.04773	-1.3103	0.0155994	0.000936878	0.0502326	0.146614	0.689136	1.80689	3.02832	1.29901
ACSF2__chr17	-0.904597	-1.82372	-0.919126	0.00888583	0.000221416	0.00823643	-0.710299	0.00450054	2.0513	3.65479	2.08426
ACSF3__chr16	0.296956	0.299692	0.00273505	0.694357	0.689969	0.999967	-0.495229	0.137235	0.158417	0.161171	1.43143e-05
ACSL1__chr4	0.392422	1.20503	0.81261	0.271906	0.00442317	0.0273339	0.41351	0.0676981	0.565582	2.35427	1.5633
ACSL3__chr2	0.570232	0.1406	-0.429632	0.0202573	0.634778	0.0626914	-0.28567	0.0570462	1.69342	0.197378	1.20279
ACSL4__chrX	0.107602	1.04383	0.93623	0.863634	0.00550966	0.0093195	-0.275679	0.152399	0.0636704	2.25887	2.03061
ACSL6__chr5	-0.486405	-0.106832	0.379574	0.695777	0.981599	0.79756	0.341172	0.499162	0.15753	0.00806588	0.0982365
ACSS1__chr20	-0.802581	-1.0339	-0.231323	0.443638	0.287233	0.926072	1.38983	0.032652	0.352971	0.541765	0.0333552
ACSS2__chr20	-0.130112	-0.0421641	0.0879479	0.773698	0.97236	0.886892	-0.281643	0.113938	0.111429	0.0121731	0.0521292
ACSS3__chr12	-0.116538	-0.134422	-0.0178845	0.886508	0.85282	0.997109	-0.400924	0.0937053	0.0523172	0.0691427	0.00125736
ACTA1__chr1	1.37831	-0.220892	-1.59921	0.0316868	0.849236	0.0167846	-0.311495	0.377096	1.49912	0.0709717	1.77509
ACTA2__chr10	0.910954	0.45083	-0.460124	0.0119901	0.163507	0.154617	-0.675504	0.00789262	1.92118	0.786463	0.810743
ACTB__chr7	0.191223	-0.512477	-0.7037	0.224721	0.00568088	0.00110483	-0.127408	0.17617	0.648356	2.24558	2.95671
ACTC1__chr15	1.15213	-0.401237	-1.55336	0.0822475	0.643027	0.0264146	-1.01989	0.0275201	1.08488	0.19177	1.57816
ACTG1__chr17	0.209211	0.162039	-0.0471724	0.0105634	0.0323955	0.604839	0.00695667	0.862943	1.9762	1.48952	0.21836
ACTG2__chr2	1.49445	0.801844	-0.692602	0.0475302	0.291031	0.380432	-0.547018	0.212761	1.32303	0.536061	0.419723
ACTL6A__chr3	-0.140095	-0.264298	-0.124203	0.62179	0.240184	0.68403	-0.151474	0.24745	0.206356	0.619457	0.164925
ACTL6B__chr7	0.424707	2.39357	1.96887	0.544349	0.00190273	0.00516077	0.877501	0.0310755	0.264123	2.72062	2.28729
ACTN1__chr14	1.13211	-0.514608	-1.64671	0.00148772	0.0563059	0.000189632	-0.718762	0.00225595	2.82748	1.24945	3.72209
ACTN2__chr1	0.172846	-0.497014	-0.66986	0.885621	0.415093	0.236314	-0.253954	0.426134	0.0527522	0.381855	0.626511
ACTN4__chr19	0.202396	-0.591682	-0.794078	0.119356	0.0010737	0.000211657	-0.35676	0.00215184	0.923156	2.96912	3.67437
ACTR10__chr14	0.210234	0.718898	0.508663	0.150813	0.000709157	0.00436619	0.279492	0.0117487	0.821561	3.14926	2.3599
ACTR1A__chr10	0.149938	0.799483	0.649545	0.455106	0.00118362	0.00350472	-0.173237	0.120064	0.341887	2.92679	2.45535
ACTR1B__chr2	-0.468031	0.293937	0.761968	0.0783863	0.279831	0.0107373	0.104913	0.485281	1.10576	0.553103	1.96911
ACTR2__chr2	0.451476	0.171261	-0.280215	0.0799815	0.59163	0.290145	-0.135663	0.360058	1.09701	0.22795	0.537386
ACTR3BP5__chr10	-0.0791999	0.40135	0.48055	0.986073	0.711493	0.620946	0.598673	0.189787	0.00609107	0.147829	0.206946
ACTR3B__chr7	-0.245137	0.210508	0.455645	0.727627	0.788385	0.376176	0.191466	0.483458	0.138091	0.103262	0.424609
ACTR3__chr2	0.340657	0.101669	-0.238988	0.195834	0.828664	0.400931	-0.00555737	0.969601	0.708113	0.0816218	0.39693
ACTR5__chr20	0.189605	0.229587	0.039983	0.705709	0.607818	0.983717	-0.193322	0.345638	0.151375	0.216226	0.00712979
ACTR6__chr12	-0.171341	0.117738	0.289079	0.795302	0.895486	0.543391	0.29482	0.21524	0.0994678	0.047941	0.264888
ACTR8__chr3	0.0773282	-0.649555	-0.726883	0.954941	0.110365	0.0763336	0.0257359	0.909659	0.0200235	0.957167	1.11728
ACVR1B__chr12	0.180971	1.01478	0.83381	0.284317	0.000195061	0.000583123	0.264914	0.0232258	0.546197	3.70983	3.23424
ACVR1C__chr2	-0.172516	-0.518506	-0.34599	0.754792	0.14974	0.368929	0.0159787	0.936533	0.122173	0.824662	0.433057
ACVR1__chr2	0.363129	0.455839	0.0927102	0.0731433	0.0308318	0.769358	0.680861	0.000717949	1.13583	1.511	0.113871
ACVR2A__chr2	0.506784	0.661755	0.154971	0.0930563	0.0351038	0.724187	0.18729	0.288436	1.03125	1.45465	0.140149
ACVR2B-AS1__chr3	0.153654	-0.221384	-0.375038	0.975956	0.950946	0.867551	-0.0516677	0.933724	0.01057	0.0218442	0.061705
ACVR2B__chr3	-0.329935	0.100558	0.430494	0.206832	0.828989	0.0973068	-0.142214	0.344161	0.684383	0.081451	1.01186
ACYP1__chr14	-0.508039	-0.480039	0.0280007	0.0498725	0.0615119	0.984378	0.140709	0.33778	1.30214	1.21104	0.00683816
ACYP2__chr2	-0.20498	-0.297607	-0.0926275	0.919753	0.840621	0.982871	-0.223671	0.618851	0.036329	0.0753998	0.00750366
ADAL__chr15	-0.254699	-0.363919	-0.10922	0.290111	0.117817	0.763245	0.252191	0.089105	0.537436	0.928792	0.117336
ADAM10__chr15	-0.0684449	-0.0708566	-0.00241171	0.977053	0.975434	0.999971	0.455678	0.144654	0.010082	0.0108019	1.25674e-05
ADAM11__chr17	-0.148115	0.00370991	0.151825	0.886689	0.999923	0.881411	-0.2391	0.386826	0.0522288	3.34525e-05	0.0548214
ADAM12__chr10	0.951166	0.753135	-0.198031	0.197885	0.328279	0.91191	-0.434118	0.31078	0.703587	0.483757	0.040048
ADAM15__chr1	0.625172	-0.69235	-1.31752	0.304322	0.245742	0.0319651	-0.526266	0.143587	0.516667	0.60952	1.49532
ADAM17__chr2	-0.560186	-0.466556	0.0936293	0.0820067	0.14486	0.897657	0.259003	0.180977	1.08615	0.839051	0.0468895
ADAM19__chr5	1.00251	1.10568	0.103162	0.0244083	0.0159163	0.925426	-0.725776	0.0174191	1.61246	1.79816	0.0336584
ADAM1A__chr12	0.0263334	0.0463685	0.0200351	0.994865	0.984195	0.997024	-0.0170159	0.941504	0.00223566	0.00691883	0.0012946
ADAM20P1__chr14	-0.102473	-0.1839	-0.0814262	0.948166	0.845308	0.966843	-0.134857	0.63283	0.0231154	0.0729851	0.0146442
ADAM21__chr14	-0.429576	-0.573539	-0.143963	0.403156	0.231211	0.889376	-0.258469	0.345221	0.394527	0.635991	0.0509147
ADAM22__chr7	-0.326818	0.622273	0.94909	0.49355	0.133164	0.0298674	0.289196	0.239895	0.306669	0.875613	1.5248
ADAM23__chr2	0.388278	0.893772	0.505494	0.692723	0.208344	0.550133	0.0664509	0.865658	0.15944	0.681219	0.259532
ADAM28__chr8	-0.366158	-0.471084	-0.104926	0.289048	0.15877	0.883211	0.200451	0.304584	0.53903	0.799232	0.0539354
ADAM32__chr8	-0.211687	-0.418602	-0.206916	0.743829	0.36113	0.753239	0.183432	0.455451	0.128527	0.442337	0.123067
ADAM33__chr20	-0.286831	-0.456323	-0.169491	0.566818	0.281433	0.809793	0.0319838	0.88901	0.246556	0.550625	0.0916259
ADAM8__chr10	0.190891	-0.0420325	-0.232924	0.557597	0.9693	0.435056	-0.0179003	0.905082	0.253679	0.013542	0.361454
ADAM9__chr8	0.847949	-0.723201	-1.57115	0.0139208	0.0278689	0.000606064	0.178716	0.323411	1.85634	1.55488	3.21748
ADAMTS10__chr19	-0.1485	1.33062	1.47912	0.851333	0.00642928	0.00380132	-0.0614366	0.790639	0.0699008	2.19184	2.42007
ADAMTS12__chr5	-0.440294	-1.01986	-0.579561	0.61802	0.139308	0.454012	-0.35881	0.368476	0.208998	0.856023	0.342933
ADAMTS13__chr9	-0.565405	-0.0775934	0.487811	0.576642	0.988677	0.657483	-0.656836	0.18644	0.239094	0.00494547	0.182116
ADAMTS15__chr11	0.728497	-0.671991	-1.40049	0.215501	0.259069	0.0241824	-0.570806	0.116192	0.66655	0.586585	1.6165
ADAMTS16__chr5	1.1662	-0.293511	-1.45971	0.250116	0.895759	0.14162	-0.32263	0.565914	0.601859	0.0478089	0.848876
ADAMTS1__chr21	1.22957	-0.412774	-1.64234	0.0448993	0.570446	0.0132082	-0.646681	0.088305	1.34776	0.243786	1.87916
ADAMTS2__chr5	-0.0103268	-0.221305	-0.210978	0.999742	0.890376	0.899679	0.155989	0.702904	0.000112013	0.0504265	0.0459125
ADAMTS3__chr4	-1.94395	-2.62801	-0.684058	0.0855222	0.0274207	0.643677	0.58642	0.367172	1.06792	1.56192	0.191332
ADAMTS5__chr21	-0.13759	0.16214	0.299731	0.865197	0.819389	0.531962	0.495034	0.0622354	0.062885	0.0865097	0.274119
ADAMTS6__chr5	-0.657583	-1.05994	-0.402356	0.0905343	0.0137017	0.320718	-0.323398	0.169165	1.04319	1.86323	0.493877
ADAMTS7__chr15	-0.6554	0.55724	1.21264	0.00637238	0.0137067	0.000243318	-0.0173805	0.878335	2.1957	1.86307	3.61383
ADAMTS9__chr3	0.871597	0.00312977	-0.868467	0.136078	0.999963	0.137505	-0.165691	0.615397	0.866211	1.5975e-05	0.861683
ADAMTSL1__chr9	0.34272	0.324487	-0.0182333	0.858521	0.871874	0.999557	0.685048	0.239784	0.0662491	0.0595461	0.000192493
ADAMTSL4__chr1	0.104072	-0.220067	-0.324139	0.736986	0.310217	0.119082	-0.266084	0.0538766	0.132541	0.508334	0.924156
ADAMTSL5__chr19	0.332067	-0.00434713	-0.336415	0.346822	0.999781	0.338817	-0.356454	0.0924628	0.459894	9.49339e-05	0.470035
ADAP1__chr7	0.229776	0.831186	0.60141	0.885289	0.273856	0.473289	-0.222613	0.593392	0.0529151	0.562478	0.324873
ADARB1__chr21	-0.410898	0.0963384	0.507237	0.0366357	0.728356	0.0149325	-0.0873932	0.419857	1.4361	0.137656	1.82587
ADARB2__chr10	0.109887	1.53037	1.42048	0.98879	0.194571	0.232799	-0.861367	0.218522	0.00489591	0.710922	0.633019
ADAR__chr1	0.00255586	0.0727652	0.0702094	0.99987	0.901746	0.908099	0.0316284	0.82378	5.64089e-05	0.0449159	0.0418667
ADAT1__chr16	-0.362522	-0.338787	0.0237348	0.591436	0.628976	0.997538	-0.104097	0.731699	0.228092	0.201366	0.00107066
ADAT2__chr6	-0.0650037	-0.180946	-0.115943	0.992807	0.946038	0.977357	0.329668	0.503672	0.00313502	0.0240913	0.00994674
ADAT3__chr19	-0.94256	-0.27846	0.664101	0.283777	0.874441	0.500478	-0.07161	0.880258	0.547023	0.0582695	0.300615
ADA__chr20	-0.259515	-1.32351	-1.064	0.909938	0.164212	0.276646	-0.86276	0.140356	0.0409882	0.784596	0.558075
ADCK1__chr14	-0.033092	-0.699591	-0.666499	0.998547	0.556093	0.584335	-0.584237	0.30931	0.000631349	0.254853	0.233338
ADCK2__chr7	-0.0523525	1.05741	1.10976	0.983241	0.0282861	0.0230672	0.211556	0.418863	0.0073399	1.54843	1.637
ADCK3__chr1	-0.200404	-0.553586	-0.353182	0.916759	0.545628	0.7696	-0.411241	0.353538	0.0377449	0.263104	0.113735
ADCK4__chr19	-0.249831	0.234519	0.48435	0.531498	0.569098	0.150987	0.221737	0.26483	0.274498	0.244813	0.82106
ADCK5__chr8	0.542367	-0.384764	-0.927131	0.412094	0.619115	0.12479	-0.803348	0.0474202	0.385004	0.208229	0.903821
ADCY10P1__chr6	-0.617111	0.235088	0.8522	0.134241	0.676682	0.0449005	0.43065	0.0986101	0.872116	0.169615	1.34775
ADCY1__chr7	0.272556	1.26904	0.996488	0.377132	0.00126048	0.00441644	0.246823	0.159226	0.423506	2.89947	2.35493
ADCY2__chr5	0.689862	1.01313	0.323267	0.334552	0.13536	0.75742	0.7624	0.0804438	0.475536	0.868509	0.120663
ADCY3__chr2	-0.999626	-0.736731	0.262894	0.145817	0.302415	0.833426	0.385016	0.335227	0.836192	0.519396	0.0791332
ADCY5__chr3	-0.442231	0.969966	1.4122	0.70338	0.245817	0.0865344	0.0884599	0.846768	0.15281	0.609387	1.06281
ADCY6__chr12	-0.102563	-0.438019	-0.335456	0.984147	0.756898	0.846567	-0.280659	0.588501	0.0069399	0.120963	0.0723385
ADCY7__chr16	0.218729	-0.38653	-0.605259	0.890905	0.707109	0.45545	-0.8441	0.0715567	0.0501686	0.150514	0.34156
ADCY9__chr16	-0.0838339	0.946929	1.03076	0.962966	0.0568295	0.0411707	0.0900179	0.74174	0.016389	1.24543	1.38541
ADCYAP1R1__chr7	-1.49055	-1.26889	0.221658	0.00817935	0.0171965	0.775308	-0.131223	0.632521	2.08728	1.76456	0.110526
ADCYAP1__chr18	0.338283	-0.96868	-1.30696	0.663977	0.0949314	0.0315117	-1.21429	0.00775053	0.177847	1.02259	1.50153
ADC__chr1	-0.437012	0.20827	0.645282	0.548173	0.862616	0.306767	-0.0839498	0.804389	0.261082	0.0641823	0.513192
ADD1__chr4	0.0324749	0.404304	0.371829	0.960295	0.0339781	0.0472303	-0.111134	0.297686	0.0175953	1.4688	1.32578
ADD2__chr2	0.485934	1.18682	0.700884	0.0382345	0.000487988	0.0075953	0.0837251	0.513693	1.41755	3.31159	2.11945
ADD3__chr10	-0.699379	-0.967757	-0.268378	0.0998924	0.0303086	0.622669	0.875706	0.00836347	1.00047	1.51843	0.205743
ADH4__chr4	-0.44215	1.46549	1.90764	0.654111	0.0532483	0.0181493	1.05951	0.0369452	0.184348	1.27369	1.74114
ADH5__chr4	0.0964877	-0.583241	-0.679728	0.521839	0.00107543	0.000466366	-0.207601	0.02313	0.282463	2.96842	3.33127
ADHFE1__chr8	-0.726992	-1.03437	-0.30738	0.427613	0.218131	0.84275	0.290335	0.537359	0.368949	0.661283	0.074301
ADI1__chr2	-0.211346	-0.503124	-0.291778	0.49007	0.063049	0.290118	0.263861	0.113675	0.309742	1.20032	0.537425
ADIPOQ-AS1__chr3	-0.189463	1.06735	1.25681	0.936135	0.202878	0.130393	0.382701	0.422412	0.0286616	0.692765	0.884744
ADIPOR1__chr1	0.439498	0.20301	-0.236488	0.00193645	0.0637024	0.0356345	0.0953271	0.149555	2.71299	1.19584	1.44813
ADIPOR2__chr12	-0.102395	-0.394573	-0.292179	0.890885	0.253428	0.436051	0.121534	0.526527	0.0501782	0.596146	0.360463
ADK__chr10	-0.0224156	-0.817684	-0.795268	0.995429	0.0365135	0.0407628	0.13883	0.514959	0.0019897	1.43755	1.38974
ADM2__chr22	0.363503	0.021679	-0.341824	0.46155	0.996859	0.49986	-0.0990292	0.687229	0.335781	0.00136625	0.301151
ADM5__chr19	0.349667	-0.209547	-0.559214	0.380317	0.680569	0.130896	-0.0858435	0.679884	0.419854	0.167128	0.883074
ADM__chr11	1.14598	0.106559	-1.03942	0.00746294	0.899364	0.0118316	0.208942	0.328684	2.12709	0.0460643	1.92696
ADNP2__chr18	0.0403524	-0.257203	-0.297555	0.962323	0.284261	0.204817	-0.107008	0.422798	0.0166791	0.546283	0.688633
ADNP__chr20	-0.197325	0.0181615	0.215486	0.528578	0.993989	0.474312	0.100695	0.504085	0.276891	0.00261829	0.323936
ADORA1__chr1	0.543651	0.869268	0.325617	0.568653	0.280332	0.80635	0.136838	0.754332	0.245152	0.552327	0.0934765
ADORA2A__chr22	-0.13456	1.13896	1.27352	0.831396	0.0060109	0.00344109	0.337101	0.121254	0.0801922	2.22106	2.4633
ADORA2B__chr17	0.346622	0.319533	-0.0270886	0.69846	0.73513	0.997671	0.156895	0.66078	0.155859	0.133636	0.00101251
ADO__chr10	0.139117	-0.481644	-0.620761	0.952198	0.583253	0.428301	-0.386302	0.347971	0.0212727	0.234143	0.368251
ADPGK__chr15	0.270368	-0.456961	-0.727329	0.629822	0.311808	0.0940651	-0.0483007	0.841693	0.200782	0.506112	1.02657
ADPRHL1__chr13	-0.252448	-0.402819	-0.150371	0.89838	0.766845	0.962256	-0.253041	0.604599	0.04654	0.115292	0.0167092
ADPRHL2__chr1	-0.0190906	0.136206	0.155297	0.996722	0.849921	0.810849	0.0161074	0.939015	0.00142597	0.0706212	0.09106
ADPRH__chr3	-0.460711	-0.807699	-0.346988	0.238869	0.0421708	0.408631	-0.18542	0.40191	0.62184	1.37499	0.388668
ADPRM__chr17	-0.0367592	0.623172	0.659931	0.995179	0.320554	0.286452	-0.481162	0.183897	0.00209875	0.494099	0.542948
ADRA1D__chr20	0.287597	-0.603409	-0.891006	0.598035	0.166045	0.046448	0.329456	0.206346	0.223274	0.779774	1.33303
ADRA2A__chr10	-0.0652983	1.61827	1.68357	0.989136	0.0299959	0.0254302	0.941638	0.0472694	0.00474394	1.52294	1.59465
ADRA2C__chr4	0.135901	0.769259	0.633358	0.945775	0.245134	0.35997	-0.0984049	0.786424	0.0242121	0.610596	0.443734
ADRB2__chr5	0.734837	-0.755452	-1.49029	0.104466	0.0956033	0.00568818	-1.32533	0.00154023	0.981024	1.01953	2.24503
ADRBK1__chr11	-0.0344697	0.325462	0.359932	0.987116	0.3767	0.314723	0.019215	0.919931	0.00563199	0.424004	0.502071
ADRBK2__chr22	-0.695499	0.645561	1.34106	0.0750476	0.0963139	0.0044515	0.211364	0.346732	1.12466	1.01631	2.35149
ADRM1__chr20	0.390974	-0.40408	-0.795054	0.0322737	0.028174	0.00105346	-0.400675	0.0050653	1.49115	1.55015	2.97738
ADSL__chr22	0.249431	-0.501752	-0.751183	0.285741	0.0339816	0.00548763	-0.129559	0.32535	0.544027	1.46876	2.26062
ADSSL1__chr14	-0.795657	-1.6293	-0.833647	0.0979268	0.00490612	0.083987	-0.127107	0.637861	1.0091	2.30926	1.07579
ADSS__chr1	-0.184547	0.423387	0.607933	0.749856	0.280246	0.110146	-0.03456	0.870667	0.125022	0.552461	0.958031
AEBP1__chr7	-0.530093	-1.39704	-0.866944	0.466965	0.0372396	0.180172	-0.916453	0.037547	0.330716	1.42899	0.744312
AEBP2__chr12	-0.493219	-0.618607	-0.125388	0.235423	0.130198	0.888375	0.170924	0.464232	0.628151	0.885394	0.0514035
AEN__chr15	0.981466	-0.161399	-1.14286	0.00176242	0.580456	0.000779482	-0.344108	0.0346806	2.75389	0.236231	3.10819
AES__chr19	0.157765	0.691822	0.534057	0.252139	0.00056085	0.00224746	0.0323328	0.669709	0.598359	3.25115	2.64831
AFAP1L1__chr5	0.250688	0.580448	0.329761	0.85245	0.463402	0.762652	0.0239198	0.951237	0.069331	0.334042	0.117674
AFAP1L2__chr10	-1.337	-1.14177	0.195231	0.00158259	0.00358913	0.635185	-0.137833	0.44568	2.80063	2.44501	0.197099
AFAP1__chr4	0.277579	1.33107	1.0535	0.297518	0.000529655	0.00186808	0.428893	0.0205148	0.526487	3.27601	2.7286
AFF1__chr4	-0.190147	-1.27674	-1.08659	0.9222	0.0908593	0.148632	0.0597452	0.886794	0.0351746	1.04163	0.827889
AFF2__chrX	-0.642254	-0.0987881	0.543466	0.0275952	0.851278	0.0534261	-0.823068	0.00139159	1.55917	0.0699288	1.27225
AFF3__chr2	-0.123	1.15762	1.28062	0.938271	0.0416809	0.0277135	0.788433	0.0363652	0.0276718	1.38006	1.55731
AFF4__chr5	0.181507	0.261876	0.0803695	0.714546	0.51639	0.933308	-0.0964276	0.619707	0.14597	0.287023	0.0299749
AFG3L1P__chr16	-1.00788	-1.43994	-0.432056	0.401674	0.195292	0.826706	-0.239592	0.699086	0.396126	0.709317	0.0826487
AFG3L2__chr18	-0.108774	-0.227184	-0.11841	0.290362	0.0301053	0.242231	-0.113804	0.0761217	0.53706	1.52136	0.61577
AFMID__chr17	0.0492966	-0.763146	-0.812443	0.983508	0.0799503	0.0642412	0.150479	0.539632	0.00722217	1.09718	1.19219
AFP__chr4	0.607994	0.0651522	-0.542842	0.00536826	0.852363	0.00928813	-0.361717	0.00995991	2.27017	0.0693756	2.03207
AFTPH__chr2	-0.29568	0.275009	0.570689	0.48934	0.533747	0.125378	0.180446	0.399988	0.310389	0.272665	0.901779
AGAP1__chr2	-0.213127	0.716183	0.92931	0.421267	0.00937112	0.0025743	0.0463689	0.731263	0.375443	2.02821	2.58934
AGAP2__chr12	-0.491257	0.91479	1.40605	0.365362	0.0744422	0.0130692	0.486035	0.123855	0.437277	1.12818	1.88375
AGAP3__chr7	-0.184883	1.00155	1.18643	0.793732	0.0271254	0.0128967	-0.221619	0.369761	0.100326	1.56662	1.88952
AGA__chr4	-0.210022	-0.751661	-0.541639	0.830977	0.16841	0.347828	-0.145064	0.63613	0.0804107	0.773632	0.458635
AGBL3__chr7	0.0994265	-0.157274	-0.256701	0.816979	0.617715	0.319418	-0.238229	0.120585	0.087789	0.209212	0.49564
AGBL4__chr1	-0.246364	0.226092	0.472457	0.675495	0.716202	0.289208	0.36902	0.160503	0.170378	0.144964	0.538789
AGBL5__chr2	-0.174687	-0.133274	0.0414131	0.580381	0.719759	0.967134	-0.167103	0.268175	0.236287	0.142813	0.0145132
AGER__chr6	0.0989719	-0.812108	-0.91108	0.97093	0.217998	0.162645	-0.600523	0.135591	0.0128122	0.661548	0.788759
AGFG1__chr2	-0.190717	0.210575	0.401292	0.40679	0.344883	0.0610021	0.124589	0.311219	0.39063	0.462328	1.21465
AGFG2__chr7	-0.130642	-0.286954	-0.156312	0.968155	0.858194	0.954832	-0.590685	0.227117	0.0140551	0.0664143	0.0200731
AGGF1__chr5	-0.22403	-0.283154	-0.0591239	0.430817	0.286486	0.935031	0.245794	0.124069	0.365707	0.542896	0.0291741
AGK__chr7	0.0994139	0.0239674	-0.0754465	0.895233	0.993473	0.937768	-0.0119648	0.949008	0.0480638	0.00284415	0.0279047
AGL__chr1	-0.347453	-0.292921	0.0545317	0.550554	0.646412	0.983867	-0.123238	0.650871	0.2592	0.18949	0.00706357
AGMAT__chr1	0.493362	-0.016073	-0.509435	0.42613	0.99895	0.405904	-0.396193	0.235537	0.370458	0.000456392	0.391577
AGMO__chr7	0.261312	0.484954	0.223643	0.676253	0.309547	0.747101	-0.048841	0.848485	0.169891	0.509274	0.126621
AGPAT1__chr6	0.158511	0.459251	0.300741	0.561214	0.0470125	0.182954	-0.116746	0.369096	0.250872	1.32779	0.737658
AGPAT2__chr9	0.407252	-1.30041	-1.70766	0.21683	0.00216285	0.000499619	-1.16502	0.000544303	0.66388	2.66497	3.30136
AGPAT3__chr21	0.521299	-0.0971696	-0.618468	0.2399	0.938771	0.15623	0.028361	0.907131	0.619971	0.0274404	0.806236
AGPAT4-IT1__chr6	0.0810284	0.702051	0.621022	0.988773	0.474443	0.549482	0.112948	0.814952	0.00490361	0.323816	0.260047
AGPAT4__chr6	-0.255688	0.157789	0.413477	0.289837	0.585813	0.0788433	-0.00401219	0.975411	0.537846	0.232241	1.10324
AGPAT5__chr8	-0.159511	-0.24821	-0.0886993	0.65508	0.392402	0.871575	0.00856967	0.954267	0.183705	0.406268	0.0596953
AGPAT6__chr8	-0.0471658	0.394365	0.441531	0.952909	0.104257	0.0715533	0.0261046	0.84709	0.0209484	0.981894	1.14537
AGPAT9__chr4	0.548805	-1.40699	-1.95579	0.30546	0.0138131	0.00277867	-0.160131	0.58185	0.515045	1.85971	2.55616
AGPHD1__chr15	-0.317701	-0.851526	-0.533825	0.614371	0.0867195	0.298402	-0.832711	0.0198694	0.211569	1.06188	0.525198
AGPS__chr2	-0.0576743	-0.377858	-0.320184	0.946068	0.172725	0.257458	-0.0249881	0.871295	0.0240774	0.762645	0.589293
AGRN__chr1	-0.475327	-0.299661	0.175665	0.179405	0.446729	0.738935	-0.253551	0.22747	0.746166	0.349956	0.131394
AGTPBP1__chr9	-0.043938	0.0557199	0.0996579	0.956543	0.931346	0.801175	-0.129813	0.342241	0.0192956	0.0308888	0.0962725
AGTRAP__chr1	-0.519982	-2.13577	-1.61579	0.735736	0.0454068	0.11886	-1.01635	0.116338	0.133278	1.34288	0.924965
AGT__chr1	0.336081	-0.053617	-0.389698	0.479573	0.979038	0.386449	0.0619637	0.790373	0.319145	0.00920063	0.412908
AGXT2L2__chr5	0.0499247	-0.832744	-0.882669	0.995965	0.3858	0.349498	-0.612731	0.245317	0.00175572	0.413638	0.456556
AHCTF1__chr1	-0.26804	-0.711994	-0.443953	0.486803	0.04093	0.189262	-0.166081	0.391444	0.312647	1.38796	0.722935
AHCYL1__chr1	-0.724719	-0.696558	0.0281607	0.00685898	0.00830045	0.98072	0.138955	0.29869	2.16374	2.0809	0.00845517
AHCYL2__chr7	0.28034	0.796624	0.516285	0.617196	0.0722956	0.248787	-0.252347	0.323474	0.209577	1.14089	0.604172
AHCY__chr20	0.26623	-0.784467	-1.0507	0.203566	0.00286549	0.000604291	-0.289571	0.0402482	0.691294	2.5428	3.21875
AHDC1__chr1	-0.0958848	0.218232	0.314117	0.936781	0.723617	0.530134	-0.195318	0.42105	0.0283618	0.140491	0.275615
AHI1__chr6	-0.390438	-0.448241	-0.0578031	0.237514	0.168788	0.960435	0.127241	0.491725	0.624312	0.772659	0.017532
AHNAK2__chr14	1.26899	1.01812	-0.250864	0.0332352	0.0760518	0.786855	-0.698704	0.0614124	1.4784	1.11889	0.104105
AHNAK__chr11	0.33599	-0.994674	-1.33066	0.444823	0.0197705	0.00506548	-0.422674	0.0918372	0.351813	1.70398	2.29538
AHRR__chr5	0.565534	0.234807	-0.330727	0.412826	0.841271	0.716437	-0.117452	0.739608	0.384233	0.0750639	0.144822
AHR__chr7	0.568952	0.351571	-0.21738	0.518295	0.764428	0.89975	-0.241953	0.569111	0.285423	0.116664	0.0458781
AHSA1__chr14	0.423597	0.526479	0.102881	0.325252	0.203376	0.923453	0.229482	0.336117	0.48778	0.6917	0.0345852
AHSA2__chr2	-0.194005	-0.447209	-0.253205	0.738647	0.262189	0.607337	-0.301238	0.198031	0.131563	0.581385	0.21657
AHSG__chr3	0.448667	1.11822	0.66955	0.797705	0.305838	0.617912	-0.0744306	0.898807	0.0981578	0.514509	0.209074
AIDA__chr1	0.283988	-0.557736	-0.841724	0.283145	0.036754	0.00580695	-0.285123	0.0828036	0.547991	1.4347	2.23605
AIF1L__chr9	-1.08126	-2.27738	-1.19612	0.130629	0.00676114	0.0955687	-0.139179	0.728588	0.883962	2.16998	1.01968
AIFM1__chrX	0.0745311	-0.342462	-0.416993	0.936795	0.31968	0.20909	-0.657571	0.00962859	0.0283552	0.495285	0.679666
AIFM2__chr10	0.971547	0.27477	-0.696777	0.0757012	0.731496	0.202418	-0.0237715	0.937329	1.1209	0.135788	0.693751
AIG1__chr6	0.362752	-0.138121	-0.500873	0.422337	0.867794	0.229507	-0.371331	0.141909	0.374341	0.0615833	0.639203
AIM1L__chr1	0.461843	-0.370142	-0.831985	0.749153	0.827987	0.427753	-0.955134	0.109221	0.125429	0.0819764	0.368807
AIM1__chr6	0.0290437	0.0613707	0.032327	0.998998	0.995539	0.998759	-0.0824526	0.887009	0.000435175	0.00194188	0.000539105
AIM2__chr1	0.0288373	0.295454	0.266616	0.998994	0.901363	0.918657	0.118039	0.837435	0.000437318	0.0451001	0.0368465
AIMP1__chr4	0.104115	-0.198537	-0.302652	0.78848	0.456138	0.206	-0.0594468	0.655876	0.103209	0.340904	0.686132
AIMP2__chr7	-0.0298765	-0.515796	-0.485919	0.991929	0.171173	0.199565	0.124263	0.559266	0.00351962	0.766565	0.699915
AIPL1__chr17	-0.039389	-0.00266609	0.0367229	0.988027	0.999945	0.989582	0.00454861	0.983983	0.00523118	2.40156e-05	0.00454821
AIP__chr11	0.0323769	0.261308	0.228931	0.893686	0.0240793	0.0413474	-0.152707	0.0388712	0.0488151	1.61836	1.38355
AJUBA__chr14	0.420236	-1.60074	-2.02097	0.289248	0.00170199	0.000482432	-0.245116	0.277	0.53873	2.76904	3.31656
AK1__chr9	-0.0547762	1.00402	1.05879	0.976865	0.0213468	0.0169093	0.396275	0.117095	0.0101656	1.67067	1.77187
AK2__chr1	0.12624	-0.950023	-1.07626	0.765172	0.00413667	0.00218284	-0.150828	0.336963	0.116241	2.38335	2.66098
AK3__chr9	-0.0259119	-0.482469	-0.456557	0.952526	0.0034776	0.00459281	-0.126133	0.125694	0.0211234	2.45872	2.33792
AK4__chr1	-0.586005	-1.40943	-0.823428	0.00317425	2.4e-05	0.00051811	-0.68193	0.000195401	2.49836	4.61896	3.28558
AK5__chr1	-0.988814	-1.46126	-0.472449	0.188852	0.0557129	0.623881	-1.23302	0.0216515	0.723877	1.25404	0.204898
AK7__chr14	-0.184999	-0.667783	-0.482784	0.918354	0.385633	0.58494	0.319635	0.434224	0.0369898	0.413825	0.232888
AK8__chr9	-0.13799	-0.536097	-0.398107	0.914788	0.326052	0.511795	-0.428439	0.174456	0.0386798	0.486713	0.290904
AKAP10__chr17	-0.269711	-0.290661	-0.0209499	0.245531	0.206089	0.989213	0.0890107	0.492606	0.609894	0.685945	0.00471006
AKAP11__chr13	0.129856	0.81361	0.683754	0.852481	0.0327412	0.063768	0.0452279	0.823735	0.0693155	1.48491	1.1954
AKAP12__chr6	0.221181	-0.349168	-0.570349	0.471133	0.200467	0.0416639	-0.363896	0.0456479	0.326856	0.697957	1.38024
AKAP13__chr15	-0.506343	0.0783837	0.584726	0.0656897	0.900071	0.0381807	-0.167891	0.29133	1.1825	0.0457232	1.41816
AKAP14__chrX	0.508164	1.07937	0.571211	0.501867	0.0992142	0.428675	-0.653469	0.110638	0.299412	1.00343	0.367872
AKAP1__chr17	0.121936	-0.69676	-0.818695	0.973623	0.464438	0.363024	-0.528322	0.285936	0.0116092	0.333072	0.440065
AKAP3__chr12	-0.0372842	-0.541335	-0.504051	0.998327	0.716512	0.747401	-0.629166	0.298029	0.000727339	0.144777	0.126446
AKAP5__chr14	-0.103848	0.390472	0.49432	0.731803	0.0610563	0.0240613	0.0635189	0.583539	0.135606	1.21427	1.61868
AKAP6__chr14	-0.267258	1.63153	1.89879	0.475198	0.000676665	0.000292212	0.487811	0.0323744	0.323126	3.16963	3.5343
AKAP7__chr6	-0.0997797	-0.0922505	0.0075292	0.952184	0.958935	0.999719	0.731158	0.0362105	0.021279	0.018211	0.000122181
AKAP8L__chr19	0.222801	-0.398253	-0.621054	0.786336	0.492823	0.224569	-0.601834	0.0672437	0.104392	0.307309	0.648651
AKAP8__chr19	-0.406251	-0.334949	0.0713018	0.0193525	0.0430075	0.783529	0.0496775	0.583221	1.71326	1.36646	0.105945
AKAP9__chr7	0.0477808	0.940447	0.892666	0.938838	0.00131127	0.00172913	0.469861	0.00637862	0.0274092	2.88231	2.76217
AKD1__chr6	0.128876	0.798462	0.669586	0.98921	0.677081	0.756112	-0.638383	0.426999	0.00471161	0.16936	0.121414
AKIP1__chr11	0.553397	0.295975	-0.257423	0.0785494	0.377658	0.465516	-0.163642	0.364854	1.10486	0.422902	0.332066
AKIRIN1__chr1	-0.00667054	0.0384278	0.0450983	0.9986	0.954919	0.938619	-0.0354362	0.754067	0.00060832	0.0200337	0.0275108
AKIRIN2__chr6	0.0420608	0.0726851	0.0306243	0.83349	0.598466	0.906678	0.0682799	0.289802	0.0790994	0.22296	0.0425469
AKNA__chr9	0.0938366	-0.117104	-0.21094	0.791881	0.700647	0.35868	-0.207054	0.122987	0.10134	0.154501	0.445293
AKR1A1__chr1	-0.0690432	-0.372714	-0.303671	0.691121	0.00913933	0.0230515	0.011354	0.870427	0.160446	2.03909	1.6373
AKR1B10__chr7	0.107126	-0.153479	-0.260605	0.908958	0.824754	0.591983	-0.345198	0.14886	0.0414562	0.0836754	0.227691
AKR1B1__chr7	-0.0524207	-0.0997581	-0.0473374	0.819851	0.515205	0.849608	-0.25302	0.0112363	0.086265	0.28802	0.0707813
AKR1C1__chr10	0.828521	2.87614	2.04762	0.249002	0.00191291	0.0104053	0.501447	0.231448	0.603797	2.7183	1.98275
AKR1C2__chr10	0.189728	1.87091	1.68118	0.777934	0.00120631	0.00212379	0.356124	0.163951	0.109057	2.91854	2.67289
AKR1C3__chr10	0.238326	-0.11085	-0.349176	0.72008	0.928447	0.514509	-0.13864	0.592105	0.142619	0.0322428	0.288607
AKR1D1__chr7	0.230998	0.781576	0.550578	0.913875	0.408534	0.619874	0.408176	0.411973	0.039113	0.388772	0.207697
AKR7A2__chr1	-0.150235	-0.610818	-0.460583	0.188617	0.000433611	0.00199177	-0.129548	0.0770803	0.724418	3.3629	2.70076
AKR7L__chr1	-0.718221	-0.647336	0.0708853	0.139895	0.185616	0.97323	0.0507015	0.851982	0.854197	0.731384	0.0117844
AKT1S1__chr19	0.395131	-0.268876	-0.664007	0.0365039	0.137985	0.00336173	-0.168121	0.133682	1.43766	0.86017	2.47344
AKT1__chr14	-0.0793756	-0.0551609	0.0242147	0.919372	0.959924	0.992105	-0.153592	0.387247	0.0365089	0.017763	0.00344251
AKT2__chr19	-0.0760301	0.0146057	0.0906358	0.927379	0.997187	0.898914	-0.00410511	0.981162	0.0327428	0.00122353	0.0462817
AKT3__chr1	0.247513	0.153336	-0.0941771	0.53416	0.773543	0.905258	-0.123153	0.518119	0.272328	0.111516	0.0432276
AKTIP__chr16	-0.0620899	0.679521	0.741611	0.968884	0.0867833	0.064128	0.213833	0.350275	0.0137283	1.06156	1.19295
ALAD__chr9	-0.464387	0.122321	0.586708	0.0554091	0.724425	0.021665	-0.212396	0.145525	1.25642	0.140007	1.66424
ALAS1__chr3	-0.152547	0.241582	0.39413	0.467368	0.195933	0.0403857	-0.0348169	0.737672	0.330341	0.707893	1.39377
ALCAM__chr3	-0.0125695	-0.0132386	-0.000669156	0.997723	0.997474	0.999994	0.0984043	0.560073	0.000990203	0.00109839	2.80746e-06
ALDH16A1__chr19	-0.593304	-0.946891	-0.353587	0.0035179	0.00028561	0.0376018	-0.2885	0.0164101	2.45372	3.54423	1.42479
ALDH18A1__chr10	0.00751232	-0.198247	-0.205759	0.99907	0.556923	0.534715	-0.0601216	0.701131	0.000404079	0.254205	0.271878
ALDH1A2__chr15	1.08323	0.432119	-0.651115	0.00821641	0.229627	0.0694164	-0.523895	0.0326921	2.08532	0.638976	1.15854
ALDH1B1__chr9	0.119146	0.0370688	-0.0820773	0.899686	0.989652	0.950618	0.121077	0.602204	0.0459089	0.00451733	0.021994
ALDH1L2__chr12	0.437088	-0.123815	-0.560903	0.627489	0.960535	0.480817	-0.375409	0.352794	0.202394	0.0174869	0.31802
ALDH2__chr12	-0.244921	0.236663	0.481585	0.204067	0.221651	0.0199193	-0.0738376	0.497429	0.690226	0.654329	1.70073
ALDH3A2__chr17	-0.100933	-0.562682	-0.461749	0.882183	0.0804923	0.148719	-0.293225	0.137165	0.0544414	1.09425	0.827634
ALDH3B1__chr11	-0.13672	-0.184811	-0.0480912	0.941722	0.896911	0.992531	0.982074	0.0266888	0.0260774	0.0472506	0.00325581
ALDH4A1__chr1	0.190867	-1.19817	-1.38903	0.959215	0.269573	0.191211	-0.967261	0.137768	0.0180842	0.569324	0.718487
ALDH5A1__chr6	-0.1685	0.287011	0.455511	0.757566	0.475963	0.201662	0.4311	0.0630052	0.12058	0.322427	0.695376
ALDH6A1__chr14	-1.13404	-1.4683	-0.334255	0.255881	0.132313	0.863343	0.345176	0.532997	0.591962	0.878396	0.0638166
ALDH7A1__chr5	-0.492679	-0.9314	-0.438721	8.59e-05	1.97e-06	0.000166414	-0.300741	0.000180812	4.06608	5.70661	3.77881
ALDH8A1__chr6	0.870911	0.69941	-0.171501	0.204718	0.328019	0.922723	-0.148793	0.696976	0.688844	0.484101	0.0349286
ALDH9A1__chr1	-0.289613	-0.591533	-0.30192	0.100757	0.00519274	0.0879789	0.417235	0.00442709	0.996724	2.2846	1.05562
ALDOA__chr16	0.644001	-0.429242	-1.07324	0.00101058	0.00805844	5.76e-05	-0.0414707	0.599383	2.99543	2.09375	4.23931
ALDOC__chr17	-0.0522473	-1.38007	-1.32782	0.985481	0.0119607	0.0142708	-0.476808	0.118177	0.00635163	1.92224	1.84555
ALG10B__chr12	-0.0246292	-0.657774	-0.633145	0.998882	0.493721	0.517204	-0.394118	0.411222	0.000485932	0.306519	0.286338
ALG10__chr12	0.524106	0.893306	0.3692	0.556189	0.232808	0.736544	0.537725	0.221503	0.254777	0.633002	0.132801
ALG11__chr13	0.467687	-0.165845	-0.633532	0.0660723	0.598742	0.0197565	-0.35901	0.0368436	1.17998	0.22276	1.70429
ALG12__chr22	0.322282	-0.249492	-0.571774	0.0972473	0.201697	0.00972556	-0.247671	0.0541107	1.01212	0.6953	2.01209
ALG13__chrX	0.0945926	-0.273122	-0.367714	0.719511	0.132515	0.0486501	-0.0258271	0.799251	0.142963	0.877734	1.31292
ALG14__chr1	0.364615	-0.343512	-0.708127	0.280298	0.315558	0.0376831	-0.213774	0.268142	0.552379	0.500921	1.42385
ALG1L9P__chr11	-0.143568	-0.0584863	0.0850819	0.919613	0.986023	0.97073	-0.491749	0.150584	0.0363951	0.0061129	0.0129017
ALG1__chr16	0.429894	0.602918	0.173024	0.543694	0.333363	0.897862	-0.19505	0.56051	0.264645	0.477082	0.0467902
ALG2__chr9	0.421742	-0.610357	-1.0321	0.111936	0.0292345	0.00245971	-0.254997	0.122334	0.951029	1.5341	2.60912
ALG3__chr3	0.484454	-0.491901	-0.976355	0.0831719	0.0789775	0.0041474	-0.402491	0.0352046	1.08002	1.1025	2.38222
ALG5__chr13	0.192639	-0.329695	-0.522334	0.0937026	0.0109097	0.00106461	-0.207323	0.014786	1.02825	1.96219	2.97281
ALG6__chr1	-0.500377	0.0367387	0.537116	0.367791	0.993601	0.324131	0.313605	0.302099	0.434398	0.00278811	0.48928
ALG8__chr11	0.239668	-1.02265	-1.26232	0.0541655	3.41e-05	9.56e-06	-0.327563	0.00238622	1.26628	4.46675	5.01938
ALG9__chr11	-0.120882	-0.3126	-0.191718	0.859823	0.411712	0.693521	-0.33061	0.126049	0.0655908	0.385407	0.15894
ALKBH1__chr14	-0.292679	-0.734761	-0.442082	0.897909	0.537627	0.786533	-0.242272	0.666993	0.0467677	0.269519	0.104283
ALKBH2__chr12	-0.320676	-0.605568	-0.284892	0.632691	0.250706	0.692753	0.00281419	0.9922	0.198809	0.600835	0.159422
ALKBH3__chr11	0.217829	-0.940031	-1.15786	0.856121	0.128178	0.0647934	-0.375714	0.299121	0.067465	0.892187	1.18847
ALKBH4__chr7	0.327222	-0.323946	-0.651168	0.724766	0.729184	0.329932	-1.12072	0.0164957	0.139802	0.137163	0.481576
ALKBH5__chr17	-0.319193	-0.162101	0.157092	0.148045	0.536651	0.555388	0.229616	0.099622	0.829605	0.270308	0.255403
ALKBH6__chr19	0.290662	0.454868	0.164206	0.61717	0.344502	0.849719	0.0402757	0.873933	0.209595	0.462808	0.0707248
ALKBH7__chr19	0.0458008	0.452997	0.407197	0.935165	0.0308213	0.0470384	-0.107352	0.352913	0.0291119	1.51115	1.32755
ALKBH8__chr11	0.257651	0.381864	0.124212	0.914935	0.825439	0.979311	-0.225993	0.678985	0.0386097	0.083315	0.00907916
ALK__chr2	-0.830924	-0.0407067	0.790217	0.353819	0.997013	0.385166	0.127843	0.786399	0.451219	0.0012991	0.414352
ALMS1__chr2	-0.125477	-0.123455	0.0020219	0.742666	0.749422	0.999919	-0.198253	0.194973	0.129207	0.125273	3.53188e-05
ALOX12B__chr17	-0.0445999	0.778143	0.822743	0.995781	0.343842	0.309953	0.438376	0.332222	0.00183619	0.463641	0.508704
ALOX5AP__chr13	0.767015	0.406322	-0.360693	0.0272977	0.220953	0.287092	-0.867285	0.00258723	1.56387	0.6557	0.541978
ALOXE3__chr17	-0.0502324	0.956131	1.00636	0.994908	0.238011	0.211066	0.353806	0.438065	0.00221718	0.623403	0.675582
ALPK1__chr4	-0.796871	0.54926	1.34613	0.510733	0.712866	0.198552	0.795418	0.202395	0.291806	0.146992	0.702125
ALPK2__chr18	1.52799	0.232896	-1.29509	0.0149582	0.812302	0.0305409	-0.4115	0.224859	1.82512	0.0902824	1.51512
ALPK3__chr15	-0.281966	0.35992	0.641885	0.78408	0.679384	0.337539	-0.800348	0.0564291	0.10564	0.167885	0.471675
ALPL__chr1	-1.18056	-1.74035	-0.559792	0.185451	0.0547617	0.624152	-0.440358	0.389206	0.73177	1.26152	0.20471
ALS2CR12__chr2	0.472611	0.122199	-0.350412	0.115694	0.81446	0.253702	-0.226875	0.207619	0.936688	0.0891301	0.595676
ALS2CR8__chr2	0.485921	0.0830356	-0.402885	0.608357	0.984346	0.704323	-0.417103	0.337502	0.215842	0.00685218	0.152228
ALS2__chr2	-0.479015	0.257318	0.736333	0.101684	0.424084	0.0198638	0.260288	0.146809	0.992748	0.372548	1.70194
ALYREF__chr17	0.176976	-0.613288	-0.790264	0.540617	0.0195564	0.00601927	-0.0794752	0.562468	0.26711	1.70871	2.22046
AMBN__chr4	-0.128908	0.8456	0.974508	0.79687	0.012148	0.00618883	1.81057	2.93e-05	0.0986124	1.91549	2.20839
AMBRA1__chr11	-0.389077	0.283985	0.673063	0.593969	0.749009	0.260487	0.0494807	0.879332	0.226236	0.125513	0.584213
AMD1__chr6	0.252957	-0.339394	-0.592351	0.67729	0.512748	0.184321	-0.260393	0.314999	0.169225	0.290096	0.734424
AMDHD2__chr16	0.115378	0.343801	0.228422	0.964217	0.734434	0.869108	-0.289388	0.458407	0.0158252	0.134047	0.0609261
AMER1__chrX	0.103455	0.824718	0.721263	0.989652	0.550507	0.626825	-0.341024	0.59893	0.00451767	0.259237	0.202854
AMER2__chr13	-0.574584	0.59617	1.17075	0.350925	0.328281	0.0493602	0.594018	0.10425	0.454786	0.483754	1.30662
AMER3__chr2	0.860034	2.48549	1.62546	0.0217226	8.76e-05	0.00094001	-0.255595	0.219181	1.66309	4.05759	3.02687
AMFR__chr16	0.00655475	-0.863613	-0.870168	0.999863	0.175136	0.171668	-0.419947	0.262406	5.94771e-05	0.756625	0.765311
AMH__chr19	-0.485583	0.0533282	0.538911	0.0977976	0.958509	0.0687801	-0.194403	0.260473	1.00967	0.0184038	1.16254
AMIGO1__chr1	0.0799724	1.03119	0.951216	0.971016	0.0553661	0.0739559	0.251168	0.40739	0.0127736	1.25676	1.13103
AMIGO2__chr12	0.125934	0.0842129	-0.041721	0.904423	0.955663	0.988866	-0.475706	0.0934596	0.0436285	0.0196954	0.00486261
AMIGO3__chr3	-0.405153	-1.69373	-1.28858	0.663646	0.0225776	0.0662398	-0.594637	0.159356	0.178063	1.64632	1.17888
AMMECR1L__chr2	-0.0484133	-0.194707	-0.146294	0.917942	0.31722	0.495595	-0.106055	0.327799	0.0371847	0.498639	0.304873
AMMECR1__chrX	-0.644439	-1.32143	-0.676988	0.528757	0.126768	0.498596	-0.115515	0.811309	0.276744	0.896992	0.302251
AMN1__chr12	0.0974381	1.31141	1.21397	0.653425	4.41e-05	6.89e-05	0.298631	0.0141161	0.184804	4.35594	4.16176
AMOTL1__chr11	-0.152837	0.229471	0.382307	0.451801	0.210212	0.0415992	-0.249875	0.0419652	0.345053	0.677343	1.38091
AMOTL2__chr3	0.279491	-0.20162	-0.481111	0.0344373	0.1109	0.00275925	-0.2119	0.020214	1.46297	0.955069	2.55921
AMOT__chrX	0.28862	-0.851335	-1.13995	0.503689	0.029968	0.00812782	-1.00926	0.00228614	0.297837	1.52334	2.09003
AMPD2__chr1	-0.137553	-0.0242847	0.113268	0.844146	0.994582	0.890518	-0.239158	0.276152	0.0735823	0.00235927	0.0503575
AMPD3__chr11	0.24951	0.213059	-0.0364508	0.713456	0.778822	0.9924	-0.309073	0.267384	0.146633	0.108562	0.00331337
AMPH__chr7	-0.811168	-0.524314	0.286854	0.182604	0.435283	0.759876	-0.0822299	0.808179	0.738489	0.361228	0.119257
AMT__chr3	-0.351726	-1.23271	-0.880983	0.628057	0.0354327	0.116657	-0.502325	0.145407	0.202001	1.4506	0.93309
AMY2B__chr1	-0.134421	-0.317648	-0.183228	0.978242	0.88624	0.960078	-0.133564	0.815699	0.00955351	0.0524486	0.0176935
AMZ2P1__chr17	-0.0882197	0.423633	0.511853	0.966066	0.492722	0.373913	0.272901	0.378386	0.014993	0.307398	0.42723
AMZ2__chr17	0.0272051	-0.0976138	-0.124819	0.977139	0.752334	0.63641	-0.272871	0.0452288	0.0100436	0.123589	0.196263
ANAPC10__chr4	0.203558	-0.553768	-0.757327	0.782633	0.232112	0.0977994	-0.30663	0.25568	0.106442	0.634303	1.00966
ANAPC11__chr17	0.116153	-0.398936	-0.51509	0.560609	0.0235042	0.00733096	-0.00820311	0.928784	0.25134	1.62885	2.13484
ANAPC13__chr3	0.262383	0.0754381	-0.186945	0.290726	0.883115	0.50092	-0.180176	0.209939	0.536516	0.0539829	0.300232
ANAPC15__chr11	0.114988	-0.985782	-1.10077	0.785838	0.0028167	0.0015833	-0.326959	0.0569906	0.104667	2.55026	2.80044
ANAPC16__chr10	-0.0203261	-0.298307	-0.277981	0.986819	0.135277	0.164889	-0.146737	0.218798	0.00576244	0.868777	0.782809
ANAPC1__chr2	-0.14939	-0.371102	-0.221711	0.908323	0.577866	0.812416	-0.0981506	0.746275	0.0417598	0.238173	0.0902217
ANAPC2__chr9	-1.19933	-0.922574	0.276757	0.016549	0.0489943	0.645567	-0.277372	0.299333	1.78123	1.30985	0.190059
ANAPC4__chr4	0.257558	-0.152222	-0.40978	0.331753	0.647877	0.104691	0.184073	0.221374	0.479186	0.188507	0.980091
ANAPC5__chr12	-0.318172	-0.441795	-0.123623	0.15222	0.0519962	0.688575	0.139764	0.283947	0.817529	1.28403	0.162049
ANAPC7__chr12	-0.0471359	-0.609566	-0.56243	0.903305	0.00332437	0.00498422	-0.00195008	0.983197	0.0441657	2.47829	2.3024
ANGEL1__chr14	-0.677651	-1.04405	-0.366401	0.621863	0.359472	0.863263	-0.658632	0.293361	0.206305	0.444334	0.0638568
ANGEL2__chr1	-0.15965	0.00278291	0.162432	0.528539	0.999784	0.518029	0.259047	0.0646207	0.276923	9.40224e-05	0.285646
ANGPT1__chr8	-0.381913	0.171563	0.553476	0.640515	0.908887	0.419678	0.637052	0.104894	0.193471	0.04149	0.377084
ANGPT2__chr8	0.140689	0.768493	0.627803	0.956508	0.332392	0.458977	0.243993	0.567013	0.0193116	0.478349	0.338209
ANGPTL1__chr1	0.138358	-0.143418	-0.281775	0.824997	0.813662	0.483546	0.197795	0.333498	0.0835474	0.0895557	0.315562
ANGPTL2__chr9	0.0568074	-1.26976	-1.32657	0.985742	0.0260473	0.0216131	-0.216293	0.479641	0.00623691	1.58424	1.66528
ANGPTL4__chr19	-0.178428	-0.0957723	0.0826561	0.95604	0.987061	0.990341	0.0950815	0.857759	0.0195238	0.00565591	0.00421521
ANG__chr14	-0.307964	-1.65548	-1.34752	0.731836	0.0140946	0.0341392	-0.92268	0.0296912	0.135586	1.85095	1.46675
ANK1__chr8	0.350966	0.733688	0.382722	0.155605	0.00940067	0.121125	0.672684	0.00223687	0.807977	2.02684	0.916765
ANK2__chr4	-0.365387	0.693117	1.0585	0.304178	0.0483666	0.00771925	-0.171633	0.384105	0.516872	1.31545	2.11242
ANK3__chr10	0.0404414	1.82524	1.7848	0.992353	0.00428262	0.00479012	0.0591963	0.839363	0.00333396	2.36829	2.31965
ANKAR__chr2	0.351129	0.457687	0.106559	0.768621	0.647916	0.975063	-0.15189	0.720955	0.114288	0.188481	0.0109673
ANKDD1A__chr15	-0.57083	-0.954007	-0.383176	0.306787	0.0776915	0.553467	-0.335121	0.287069	0.513163	1.10963	0.256909
ANKEF1__chr20	0.193008	-0.750755	-0.943762	0.856573	0.172414	0.0869761	-0.504549	0.136342	0.0672356	0.763428	1.0606
ANKFN1__chr17	-0.00164028	-0.302854	-0.301214	0.999929	0.169962	0.172435	0.0209613	0.864559	3.09795e-05	0.769647	0.763376
ANKFY1__chr17	-0.339973	0.214555	0.554528	0.316397	0.598454	0.0890017	0.564514	0.0174358	0.499768	0.222969	1.0506
ANKHD1__chr5	-0.2958	-0.450249	-0.154448	0.335942	0.122572	0.711975	-0.134373	0.422119	0.473736	0.911608	0.147536
ANKH__chr5	-0.537803	-0.124946	0.412857	0.425704	0.948343	0.586998	-0.116731	0.733655	0.370892	0.0230345	0.231363
ANKIB1__chr7	0.01479	0.319598	0.304808	0.99805	0.452107	0.481784	-0.0389252	0.854191	0.000847891	0.344759	0.317147
ANKLE1__chr19	0.540518	0.645849	0.105331	0.709898	0.62017	0.986321	-0.0579286	0.91859	0.148804	0.207489	0.00598172
ANKLE2__chr12	-0.130847	-0.198594	-0.0677468	0.819117	0.64357	0.946635	-0.231619	0.232813	0.0866539	0.191404	0.0238173
ANKMY1__chr2	0.0438319	-0.579752	-0.623584	0.994225	0.418596	0.372758	-0.619151	0.126415	0.00251528	0.378204	0.428573
ANKMY2__chr7	-0.509852	0.580172	1.09002	0.0274014	0.0156468	0.000647227	0.0503494	0.681105	1.56223	1.80557	3.18894
ANKRA2__chr5	0.0141588	0.0215335	0.00737473	0.998137	0.995697	0.999494	-0.0995938	0.634132	0.000809929	0.00187259	0.000219781
ANKRD10__chr13	-0.145914	-0.213449	-0.0675345	0.890123	0.783764	0.97499	-0.39191	0.177692	0.0505499	0.105815	0.011
ANKRD11__chr16	0.128942	-0.0509452	-0.179887	0.815687	0.967775	0.680959	-0.185516	0.317485	0.0884764	0.0142255	0.166879
ANKRD12__chr18	0.146897	1.17342	1.02652	0.927373	0.0562295	0.0897643	0.144761	0.669028	0.0327456	1.25004	1.0469
ANKRD13A__chr12	-0.209711	-0.0237001	0.186011	0.261925	0.978627	0.332658	-0.209276	0.0756467	0.581823	0.00938276	0.478003
ANKRD13B__chr17	-0.601239	0.428874	1.03011	0.0444004	0.139056	0.00392306	0.423547	0.0341483	1.35261	0.856809	2.40637
ANKRD13C__chr1	0.0194977	0.281931	0.262434	0.992532	0.28449	0.327221	0.0690843	0.630683	0.0032556	0.545933	0.485159
ANKRD13D__chr11	-0.371669	-0.542734	-0.171066	0.921544	0.842363	0.982651	-0.775485	0.360094	0.0354842	0.0745005	0.00760062
ANKRD16__chr10	-0.120558	0.344469	0.465027	0.910449	0.501496	0.314411	0.231287	0.366251	0.0407444	0.299732	0.502502
ANKRD17__chr4	-0.0613769	0.1441	0.205477	0.954627	0.780967	0.617263	-0.0023279	0.98964	0.0201664	0.107367	0.20953
ANKRD18DP__chr3	0.227576	-0.0898744	-0.31745	0.299129	0.799289	0.132508	-0.45154	0.00712692	0.524142	0.0972964	0.87776
ANKRD1__chr10	1.62016	0.529515	-1.09065	0.0141693	0.418442	0.070315	-1.2162	0.00879866	1.84865	0.378365	1.15295
ANKRD20A12P__chr1	0.344801	1.28332	0.938519	0.585771	0.0200331	0.0690846	-0.176528	0.541607	0.232272	1.69825	1.16062
ANKRD20A9P__chr13	-0.0912809	1.23253	1.32381	0.969402	0.0418219	0.0314242	0.565257	0.12104	0.0134961	1.3786	1.50274
ANKRD23__chr2	0.108687	-0.173375	-0.282062	0.923345	0.81971	0.606938	-0.269653	0.288747	0.0346361	0.0863397	0.216856
ANKRD24__chr19	0.319735	0.184085	-0.135649	0.617492	0.844706	0.91133	-0.216975	0.448659	0.209369	0.0732946	0.0403241
ANKRD26__chr10	-0.153951	0.14246	0.296411	0.893115	0.907501	0.671157	-0.106197	0.712609	0.0490924	0.042153	0.173176
ANKRD27__chr19	-0.714173	-0.826337	-0.112164	0.732535	0.663917	0.991942	-0.307199	0.69839	0.135171	0.177886	0.00351365
ANKRD28__chr3	-0.0915097	-0.0975654	-0.00605567	0.949886	0.943298	0.999773	-0.345169	0.206258	0.0223287	0.0253513	9.86454e-05
ANKRD29__chr18	-0.274474	0.362318	0.636792	0.778582	0.654962	0.316956	0.36044	0.310563	0.108696	0.183784	0.499002
ANKRD30BL__chr2	-0.0888157	-0.276174	-0.187358	0.974359	0.785086	0.892386	0.0986894	0.777167	0.0112811	0.105083	0.0494472
ANKRD30BP2__chr21	0.144555	1.07736	0.9328	0.914417	0.0527076	0.0876814	0.598661	0.085168	0.0388558	1.27813	1.05709
ANKRD31__chr5	-0.106137	-0.142076	-0.035939	0.731128	0.583108	0.96304	-0.208864	0.111245	0.136007	0.234251	0.0163557
ANKRD32__chr5	-0.440772	-0.741338	-0.300566	0.730779	0.443682	0.860671	-0.873344	0.109057	0.136214	0.352929	0.0651628
ANKRD33B__chr5	1.45261	-0.928491	-2.3811	0.00949012	0.0621227	0.000753651	-1.23685	0.00325714	2.02273	1.20675	3.12283
ANKRD34A__chr1	0.355087	1.07059	0.715506	0.649605	0.0726275	0.232777	0.106644	0.747043	0.187351	1.1389	0.633061
ANKRD35__chr1	0.23167	0.0490738	-0.182596	0.780739	0.988499	0.855378	-0.0157404	0.956427	0.107494	0.00502396	0.0678421
ANKRD36BP1__chr1	0.427861	0.184533	-0.243327	0.396236	0.822173	0.717155	-0.126881	0.628003	0.402046	0.0850368	0.144387
ANKRD36B__chr2	-0.247129	0.865531	1.11266	0.771884	0.108185	0.0449429	0.36253	0.254766	0.112448	0.965834	1.34734
ANKRD36__chr2	0.126777	0.0697167	-0.05706	0.658234	0.875557	0.914216	-0.394424	0.013783	0.181619	0.0577156	0.0389512
ANKRD37__chr4	0.929046	0.688702	-0.240343	0.141084	0.292132	0.834857	-0.0914668	0.795567	0.850523	0.53442	0.0783879
ANKRD39__chr2	0.470754	0.0704824	-0.400272	0.26093	0.962764	0.357616	-0.111199	0.629197	0.583475	0.0164799	0.446583
ANKRD40__chr17	-0.0199869	-0.581724	-0.561738	0.985683	0.00783048	0.00924984	-0.292108	0.0273902	0.00626264	2.10621	2.03387
ANKRD42__chr11	-0.28059	-0.582989	-0.302399	0.712336	0.287577	0.676734	-0.338738	0.277434	0.147315	0.541245	0.169582
ANKRD44__chr2	-0.563316	-0.224712	0.338605	0.65822	0.931753	0.853766	-0.0786078	0.882398	0.181629	0.0306993	0.0686613
ANKRD45__chr1	-0.251392	0.267902	0.519293	0.615935	0.580079	0.188176	0.212388	0.350695	0.210465	0.236513	0.725437
ANKRD46__chr8	-0.0909796	0.769087	0.860067	0.730112	0.00146067	0.000800728	0.257669	0.0359435	0.136611	2.83545	3.09651
ANKRD49__chr11	-0.00922947	0.110258	0.119487	0.999305	0.907031	0.892018	0.100021	0.65404	0.000301937	0.042378	0.0496266
ANKRD50__chr4	0.174098	0.814588	0.64049	0.331311	0.000823915	0.00294038	0.128176	0.209165	0.479764	3.08412	2.5316
ANKRD52__chr12	0.124884	0.0790411	-0.0458429	0.703508	0.864161	0.951294	-0.172458	0.213177	0.152731	0.0634055	0.0216852
ANKRD53__chr2	-0.0474863	0.0576789	0.105165	0.988238	0.982712	0.944051	-0.479025	0.119988	0.00513839	0.00757366	0.0250044
ANKRD54__chr22	-0.148773	0.103109	0.251882	0.861382	0.929947	0.664415	0.0770765	0.749477	0.064804	0.0315419	0.177561
ANKRD55__chr5	-0.00228633	0.674323	0.676609	0.999962	0.109228	0.108078	0.053747	0.819162	1.64803e-05	0.961667	0.966262
ANKRD61__chr7	0.201669	-0.21404	-0.415708	0.560271	0.524624	0.145504	-0.309706	0.0889504	0.251602	0.280151	0.837124
ANKRD65__chr1	0.102876	-0.0533204	-0.156196	0.981194	0.994901	0.957355	-0.0062871	0.989351	0.00824517	0.00222022	0.0189268
ANKRD6__chr6	-0.620191	-1.21649	-0.596301	0.709078	0.317578	0.726745	-1.28511	0.0845253	0.149306	0.498149	0.138618
ANKRD9__chr14	-0.430086	-1.68191	-1.25183	0.133927	0.00026795	0.00135206	-0.303914	0.0950955	0.873131	3.57195	2.869
ANKS1A__chr6	0.28279	0.819453	0.536663	0.38898	0.0146672	0.0794073	-0.272073	0.14493	0.410073	1.83365	1.10014
ANKS1B__chr12	-0.72051	-0.0490106	0.671499	0.0159283	0.959411	0.0217129	0.744762	0.00217741	1.79783	0.0179953	1.66328
ANKS3__chr16	-0.0727839	-0.696012	-0.623228	0.991845	0.512974	0.578833	-0.427707	0.413848	0.00355631	0.289905	0.237446
ANKS6__chr9	-0.0922908	-0.157242	-0.0649516	0.974025	0.927049	0.98702	-0.181726	0.616391	0.0114297	0.0328974	0.00567397
ANKZF1__chr2	0.132065	-0.0288877	-0.160952	0.980701	0.999065	0.971515	-0.239393	0.690433	0.00846321	0.00040623	0.0125503
ANLN__chr7	0.0898422	-2.01055	-2.10039	0.991181	0.0664948	0.0567621	-0.883844	0.177269	0.00384721	1.17721	1.24594
ANO10__chr3	0.266013	-0.202572	-0.468584	0.128123	0.257683	0.0151487	-0.462313	0.00259804	0.892374	0.588915	1.81962
ANO1__chr11	-1.02241	-1.47726	-0.45485	0.0614619	0.0135391	0.449753	-0.970437	0.0149819	1.21139	1.86841	0.347025
ANO2__chr12	-0.108403	-0.153547	-0.0451436	0.838945	0.710153	0.969259	-0.279926	0.119919	0.0762665	0.148648	0.01356
ANO4__chr12	0.648631	-0.248761	-0.897392	0.231892	0.766406	0.0940698	-1.05228	0.0102996	0.634714	0.115541	1.02655
ANO5__chr11	-0.802385	-0.598269	0.204116	0.0162607	0.0542743	0.589997	0.287912	0.127251	1.78886	1.26541	0.22915
ANO6__chr12	-0.146945	-0.60041	-0.453465	0.74186	0.0489467	0.126739	-0.333578	0.0805243	0.129678	1.31028	0.897091
ANO7__chr2	-0.261329	-0.517706	-0.256377	0.702786	0.303488	0.711626	0.235442	0.397949	0.153177	0.517859	0.147748
ANO8__chr19	-0.108508	0.555259	0.663767	0.78704	0.0317738	0.0147254	0.203709	0.172819	0.104003	1.49793	1.83193
ANP32A-IT1__chr15	-0.366935	-0.00962233	0.357313	0.661999	0.999695	0.67536	-0.399071	0.277511	0.179143	0.000132314	0.170465
ANP32A__chr15	-0.187328	-0.428003	-0.240676	0.163118	0.00666809	0.0753068	0.0255098	0.734259	0.787499	2.176	1.12317
ANP32B__chr9	-0.250376	-0.948933	-0.698558	0.0124639	8.31e-06	5.23e-05	-0.325054	0.000500027	1.90435	5.0806	4.28139
ANP32E__chr1	-0.320365	-1.29817	-0.977809	0.262222	0.000951725	0.00418659	-0.0628023	0.688345	0.581331	3.02149	2.37814
ANTXR1__chr2	-0.171031	-0.909388	-0.738357	0.669663	0.00797668	0.0206883	-0.15323	0.370037	0.174144	2.09818	1.68427
ANTXR2__chr4	0.500666	-0.357417	-0.858083	0.196988	0.391439	0.0334565	-0.291073	0.207545	0.705561	0.407335	1.47552
ANXA11__chr10	0.235784	-0.552304	-0.788089	0.639688	0.151236	0.0464817	-0.867108	0.00559388	0.194032	0.820345	1.33272
ANXA1__chr9	1.88448	0.0735335	-1.81095	0.00374213	0.975267	0.0045712	-0.344566	0.266202	2.42688	0.0108767	2.33997
ANXA2P2__chr9	-0.102497	0.223109	0.325606	0.972789	0.879443	0.76558	0.0688861	0.859649	0.0119815	0.0557924	0.116009
ANXA2R__chr5	-0.062317	-0.151849	-0.0895317	0.982265	0.900621	0.963854	-0.549035	0.0994791	0.00777122	0.0454578	0.0159888
ANXA2__chr15	1.36525	-0.407211	-1.77246	0.000812432	0.153026	0.000190791	-0.500239	0.0167395	3.09021	0.815235	3.71944
ANXA3__chr4	1.04971	-0.599005	-1.64871	0.0239035	0.169284	0.00281159	-0.629768	0.0351833	1.62154	0.771383	2.55105
ANXA4__chr2	1.14785	-0.54872	-1.69657	0.115879	0.522824	0.0280647	-1.31129	0.0152535	0.935997	0.281645	1.55184
ANXA5__chr4	0.83381	-0.699781	-1.53359	0.0747941	0.131089	0.0056005	-0.563196	0.0635784	1.12613	0.882433	2.25177
ANXA6__chr5	-0.0532134	-0.790575	-0.737362	0.90006	0.00147202	0.0021247	-0.212071	0.0748493	0.0457286	2.83209	2.6727
ANXA7__chr10	0.217728	-0.602049	-0.819776	0.220412	0.00467132	0.000934345	-0.225582	0.053043	0.656764	2.33056	3.02949
AOAH__chr7	-0.124305	-0.387771	-0.263465	0.813155	0.206768	0.43498	0.0826837	0.62961	0.0898267	0.684517	0.36153
AOC2__chr17	0.774939	-0.0709078	-0.845847	0.0446935	0.955304	0.0315528	-0.53913	0.0359414	1.34976	0.0198584	1.50096
AP1AR__chr4	-0.0227156	0.387208	0.409924	0.993672	0.238696	0.208755	0.0989477	0.587603	0.00275699	0.622154	0.680364
AP1B1__chr22	0.402303	0.383832	-0.0184706	0.234797	0.260682	0.996061	-0.0707283	0.705162	0.629307	0.583889	0.00171389
AP1G1__chr16	0.256654	0.0632266	-0.193428	0.0568044	0.75559	0.14322	0.0660124	0.386336	1.24562	0.121714	0.843998
AP1G2__chr14	-0.96682	-0.397617	0.569203	0.560438	0.899112	0.807412	-0.237465	0.756789	0.251472	0.0461863	0.0929046
AP1M1__chr19	-0.00313745	0.212863	0.216	0.999037	0.0667087	0.0633081	-0.101331	0.149291	0.000418382	1.17582	1.19854
AP1M2__chr19	0.775702	0.0350395	-0.740663	0.356087	0.997478	0.384947	-1.07721	0.0435753	0.448444	0.00109652	0.4146
AP1S1__chr7	0.511071	0.720736	0.209664	0.0869587	0.0234253	0.560659	-0.03613	0.827682	1.06069	1.63031	0.251301
AP1S2__chrX	0.205022	-0.0865356	-0.291557	0.35785	0.809424	0.164715	-0.613785	0.00154539	0.446299	0.0918241	0.783267
AP1S3__chr2	0.756686	-0.000134193	-0.756821	0.222681	1	0.222588	0.512098	0.169046	0.652318	2.67832e-08	0.652499
AP2A1__chr19	0.0671843	0.469935	0.40275	0.990277	0.641857	0.717439	0.0830175	0.846866	0.0042432	0.192562	0.144215
AP2A2__chr11	0.292655	0.336922	0.0442677	0.582956	0.49867	0.986561	-0.0826847	0.732048	0.234364	0.302187	0.00587584
AP2B1__chr17	0.752732	0.677749	-0.074983	0.00291012	0.00494569	0.839017	0.151697	0.205593	2.53609	2.30577	0.0762294
AP2M1__chr3	0.353916	0.252752	-0.101165	0.106653	0.260016	0.769708	-0.156716	0.229634	0.972026	0.584999	0.113674
AP2S1__chr19	0.0599744	-0.146221	-0.206195	0.782547	0.293746	0.124897	-0.106537	0.188868	0.10649	0.532028	0.903448
AP3B1__chr5	0.00647875	-0.708543	-0.715022	0.999437	0.0298782	0.0287737	-0.268186	0.156324	0.000244506	1.52465	1.541
AP3B2__chr15	-0.328236	0.574787	0.903022	0.448736	0.137906	0.0277652	0.142678	0.516935	0.348009	0.860418	1.5565
AP3D1__chr19	0.115088	-0.0190667	-0.134154	0.910147	0.997378	0.880557	-0.297166	0.235755	0.0408884	0.00114008	0.0552427
AP3M1__chr10	-0.0757694	-0.247775	-0.172006	0.557625	0.0282945	0.107649	0.144985	0.0442101	0.253658	1.5483	0.96799
AP3M2__chr8	-0.113181	0.217479	0.33066	0.799322	0.470651	0.219201	0.358993	0.0450178	0.097278	0.327301	0.659157
AP3S1__chr5	0.224063	0.0533472	-0.170716	0.108156	0.833207	0.227085	-0.0744095	0.356648	0.96595	0.0792473	0.643811
AP4B1__chr1	0.286551	0.443392	0.156841	0.167372	0.0391664	0.518296	0.23179	0.0813035	0.776318	1.40709	0.285422
AP4E1__chr15	-0.058975	-0.749498	-0.690523	0.994515	0.460032	0.510965	-0.849604	0.12833	0.00238885	0.337212	0.291609
AP4M1__chr7	0.359486	0.460141	0.100655	0.540023	0.386297	0.948112	0.384146	0.194645	0.267588	0.413079	0.0231405
AP4S1__chr14	-0.00739317	-0.0959534	-0.0885603	0.99926	0.88505	0.90092	-0.203951	0.261928	0.000321484	0.0530323	0.0453137
AP5B1__chr11	-0.170468	0.504933	0.6754	0.882076	0.385967	0.215885	0.105093	0.728255	0.0544941	0.41345	0.665777
AP5M1__chr14	0.0333372	0.00966921	-0.023668	0.968364	0.997286	0.983884	0.457922	0.00654965	0.0139612	0.00118043	0.00705624
AP5S1__chr20	0.107625	0.330698	0.223073	0.938864	0.578416	0.769621	0.0205427	0.939215	0.0273973	0.23776	0.113723
AP5Z1__chr7	0.0377458	-0.114537	-0.152283	0.99261	0.934638	0.888299	0.0422096	0.878915	0.00322143	0.0293565	0.0514407
APAF1__chr12	0.451707	0.391752	-0.0599544	0.648319	0.717632	0.991815	0.102423	0.806767	0.188211	0.144098	0.00356938
APBA1__chr9	-0.295093	0.751511	1.0466	0.768111	0.247068	0.10079	0.308409	0.399926	0.114576	0.607184	0.996581
APBA2__chr15	-0.452964	0.766933	1.2199	0.0411195	0.00376981	0.000314106	0.0520825	0.665374	1.38595	2.42368	3.50292
APBA3__chr19	-0.288995	-0.169389	0.119606	0.0609967	0.278594	0.49361	-0.179484	0.0689673	1.21469	0.555028	0.306616
APBB1__chr11	-0.245066	0.689311	0.934377	0.0358974	0.000203001	3.54e-05	0.17844	0.0246617	1.44494	3.6925	4.45118
APBB2__chr4	-0.720952	-0.732332	-0.0113802	0.0425277	0.0399985	0.998594	0.0348622	0.855915	1.37133	1.39796	0.000610966
APBB3__chr5	0.115202	1.12495	1.00975	0.880706	0.00762692	0.0126754	0.105964	0.604309	0.0551691	2.11765	1.89704
APC2__chr19	-0.236248	1.68016	1.91641	0.700948	0.00257754	0.00129063	0.229938	0.361827	0.154314	2.58879	2.8892
APCDD1L-AS1__chr20	0.0442347	0.0700045	0.0257698	0.994621	0.986601	0.99817	-0.519347	0.204608	0.00234249	0.00585866	0.000795496
APCDD1__chr18	-0.85118	-0.317438	0.533742	0.311818	0.824883	0.597776	0.21796	0.631407	0.506098	0.0836075	0.223461
APC__chr5	-0.220361	0.865687	1.08605	0.711426	0.0436288	0.0169462	0.413218	0.112414	0.147871	1.36023	1.77093
APEH__chr3	0.0117419	-0.129648	-0.14139	0.997424	0.741705	0.703213	-0.0264751	0.85637	0.00112035	0.129769	0.152913
APEX1__chr14	-0.114723	-0.503266	-0.388543	0.800221	0.0661269	0.150623	-0.151294	0.335494	0.0967902	1.17962	0.82211
APEX2__chrX	0.0769089	-0.687298	-0.764207	0.928812	0.0380903	0.0246373	-0.48557	0.0292571	0.032072	1.41919	1.60841
APH1A__chr1	0.0602364	-0.140809	-0.201045	0.968153	0.841452	0.710542	-0.221657	0.31552	0.0140559	0.0749707	0.14841
APH1B__chr15	-0.842507	-0.63404	0.208468	0.00172508	0.00727922	0.326145	0.0422148	0.709874	2.76319	2.13791	0.486589
API5__chr11	0.1138	-0.177184	-0.290983	0.700405	0.449984	0.165887	-0.167445	0.18589	0.154651	0.346803	0.780187
APIP__chr11	0.0328361	0.113602	0.0807654	0.989166	0.880044	0.936797	0.320808	0.143261	0.00473087	0.0554956	0.0283545
APITD1-CORT__chr1	0.073617	0.114858	0.0412412	0.988507	0.972332	0.996374	0.246139	0.574508	0.0050201	0.0121856	0.00157765
APITD1__chr1	-0.160534	-0.989706	-0.829171	0.828427	0.0245976	0.0500577	-0.584569	0.0381053	0.081746	1.60911	1.30053
APLF__chr2	-0.826452	-1.29541	-0.468957	0.179292	0.041237	0.512148	0.133651	0.697695	0.74644	1.38471	0.290605
APLN__chrX	0.579849	-1.00479	-1.58464	0.443332	0.13867	0.0275444	-0.774835	0.0767422	0.353271	0.858016	1.55997
APLP1__chr19	0.172974	1.2856	1.11263	0.730114	0.00286347	0.00592009	0.0647905	0.733977	0.136609	2.54311	2.22767
APLP2__chr11	0.175368	-0.424083	-0.599451	0.216584	0.00866364	0.00150753	-0.140157	0.111028	0.664374	2.0623	2.82173
APMAP__chr20	0.521688	-0.00369374	-0.525382	0.00433633	0.999219	0.00418548	0.251945	0.0199586	2.36288	0.000339169	2.37825
APOA1BP__chr1	-0.147797	-0.501075	-0.353278	0.37075	0.00610126	0.0297585	-0.117619	0.203621	0.430919	2.21458	1.52639
APOBEC3C__chr22	0.063633	-0.975449	-1.03908	0.965933	0.0196975	0.014877	-0.699689	0.0147358	0.0150529	1.70559	1.82749
APOBEC3F__chr22	-0.0923453	-0.325623	-0.233277	0.955165	0.59169	0.75499	-0.0776994	0.775449	0.0199215	0.227905	0.122059
APOC1__chr19	-0.0309976	-1.01022	-0.979223	0.995115	0.0497322	0.0558768	-1.02762	0.00867911	0.00212655	1.30336	1.25277
APOE__chr19	0.0833343	0.351316	0.267982	0.988904	0.82514	0.892822	-1.16441	0.050689	0.00484573	0.0834724	0.0492353
APOL2__chr22	0.172179	-1.00067	-1.17285	0.970934	0.422629	0.323713	-1.06163	0.130485	0.0128101	0.374041	0.48984
APOL4__chr22	-0.584602	0.199009	0.783611	0.242524	0.815697	0.110769	0.222139	0.430134	0.615245	0.0884709	0.955581
APOL6__chr22	0.520631	1.27429	0.753663	0.640282	0.133826	0.420108	0.665857	0.193501	0.193629	0.873458	0.37664
APOLD1__chr12	-0.659426	-0.749895	-0.0904685	0.209194	0.149426	0.962108	0.106085	0.716041	0.679451	0.825573	0.0167762
APOM__chr6	-0.0271407	0.338995	0.366136	0.994267	0.457014	0.408464	0.824263	0.00896546	0.00249692	0.34007	0.388847
APOOL__chrX	-0.343693	-0.497046	-0.153353	0.434894	0.215667	0.830514	-0.13284	0.554565	0.361617	0.666216	0.0806531
APOO__chrX	0.0467046	-0.243048	-0.289752	0.870957	0.0858434	0.0456263	-0.0388527	0.624221	0.0600032	1.06629	1.34078
APOPT1__chr14	0.26731	0.494729	0.227419	0.139183	0.0137686	0.213321	-0.0285418	0.777821	0.856413	1.86111	0.670966
APPBP2__chr17	-0.155763	0.180069	0.335831	0.506145	0.415354	0.0966888	0.283481	0.039132	0.295725	0.381581	1.01462
APPL1__chr3	-0.133629	0.0768782	0.210507	0.734359	0.899559	0.489861	0.242249	0.138791	0.134091	0.0459705	0.309927
APPL2__chr12	-0.817641	-0.187498	0.630143	0.00505448	0.504654	0.0172498	0.280839	0.0732037	2.29632	0.297006	1.76322
APP__chr21	-0.133738	0.24748	0.381218	0.743486	0.402206	0.160696	0.323247	0.0675581	0.128727	0.395551	0.793995
APRT__chr16	0.420634	-0.244777	-0.665412	0.105544	0.381099	0.018442	-0.0418701	0.773148	0.976566	0.418963	1.73419
APTX__chr9	0.346624	-0.243263	-0.589887	0.5156	0.708248	0.198826	-0.20362	0.435452	0.287687	0.149815	0.701527
AQP11__chr11	0.0518944	1.12896	1.07706	0.993737	0.127848	0.14652	0.279084	0.508113	0.00272853	0.893308	0.834103
AQP3__chr9	0.153394	-0.349942	-0.503336	0.8689	0.513212	0.288085	-0.519414	0.0783639	0.0610304	0.289703	0.540479
AQP4__chr18	-0.0597001	0.565175	0.624875	0.987325	0.380227	0.318271	0.232337	0.495286	0.00553984	0.419957	0.497204
AQP5__chr12	0.0505222	0.231135	0.180613	0.994001	0.883888	0.926831	0.15145	0.714386	0.00261337	0.0536025	0.0329993
AQP7P3__chr9	0.110958	0.290713	0.179755	0.968855	0.810106	0.920978	-0.0780169	0.842962	0.0137414	0.0914581	0.0357506
AQP8__chr16	0.34531	-0.0397608	-0.385071	0.36602	0.984271	0.29954	0.00510892	0.979548	0.436495	0.00688512	0.523545
AQR__chr15	0.157686	-0.24915	-0.406836	0.574656	0.293304	0.077822	-0.0750958	0.562061	0.240592	0.532681	1.1089
ARAF__chrX	-0.0434913	-0.801076	-0.757584	0.94525	0.00251672	0.0033522	-0.280322	0.0443799	0.0244535	2.59916	2.47467
ARAP1__chr11	-0.293074	-0.244821	0.0482528	0.694784	0.771965	0.98956	0.0518529	0.861766	0.15815	0.112403	0.0045578
ARAP2__chr4	-0.743667	-0.544197	0.199471	0.278601	0.471378	0.893148	0.617491	0.133752	0.555017	0.326631	0.0490767
ARAP3__chr5	-0.181766	0.143373	0.325139	0.93654	0.959863	0.814812	0.0965885	0.828926	0.0284735	0.0177908	0.0889425
ARCN1__chr11	0.350378	0.0463529	-0.304025	0.0775678	0.932074	0.122502	-0.0203412	0.853219	1.11032	0.0305498	0.911855
ARC__chr8	0.628237	0.477957	-0.15028	0.485165	0.64401	0.954491	-0.368783	0.41418	0.31411	0.191107	0.0202283
ARF1__chr1	0.371845	0.0215953	-0.35025	0.0258472	0.976044	0.0331092	-0.300179	0.011676	1.58759	0.0105305	1.48005
ARF3__chr12	0.172774	0.0931188	-0.0796548	0.593532	0.850989	0.887863	-0.152383	0.31372	0.226556	0.0700761	0.0516539
ARF4__chr3	0.491917	0.0821003	-0.409817	0.000594683	0.448684	0.00159293	-0.0356182	0.517686	3.22571	0.34806	2.7978
ARF5__chr7	0.20626	0.73689	0.530631	0.608774	0.0283713	0.0959854	0.0305756	0.863198	0.215544	1.54712	1.01779
ARF6__chr14	-0.33146	-0.721413	-0.389953	0.0453308	0.00115895	0.0234168	-0.113053	0.236499	1.34361	2.93594	1.63047
ARFGAP1__chr20	0.499134	0.395286	-0.103848	0.126473	0.233784	0.880748	-0.507006	0.0272912	0.898001	0.631185	0.0551483
ARFGAP2__chr11	0.321436	0.0162212	-0.305215	0.460009	0.997739	0.492334	-0.527984	0.0431983	0.337234	0.000983208	0.30774
ARFGAP3__chr22	-0.0244652	-0.321263	-0.296798	0.98553	0.162026	0.199129	-0.0925951	0.479024	0.00633027	0.790416	0.700865
ARFGEF1__chr8	0.1034	0.268563	0.165163	0.704957	0.163261	0.440015	0.109327	0.328734	0.151837	0.787117	0.356533
ARFGEF2__chr20	0.229099	0.0338774	-0.195222	0.601129	0.987942	0.685149	-0.569425	0.0223137	0.221032	0.00526872	0.164215
ARFIP1__chr4	-0.0345898	-0.808402	-0.773813	0.989946	0.044309	0.0523298	-0.406053	0.0993099	0.0043887	1.35351	1.28125
ARFIP2__chr11	-0.125325	0.0637741	0.189099	0.77844	0.935243	0.581632	0.0688339	0.659473	0.108775	0.0290755	0.235352
ARFRP1__chr20	0.457292	0.195119	-0.262173	0.0924108	0.548288	0.364579	-0.438254	0.023212	1.03428	0.260991	0.438209
ARG2__chr14	-0.52928	0.96849	1.49777	0.0269554	0.00146753	0.000132002	-0.134599	0.307181	1.56935	2.83341	3.87942
ARGFX__chr3	0.0670544	-0.142877	-0.209931	0.952182	0.805628	0.638827	-0.0733708	0.702171	0.0212801	0.0938652	0.194617
ARGLU1__chr13	-0.73432	-0.289893	0.444427	0.00167351	0.0989341	0.0193591	0.103635	0.311348	2.77637	1.00465	1.71311
ARHGAP10__chr4	0.700642	0.109884	-0.590758	0.0463142	0.878125	0.0854769	-0.443179	0.0514919	1.33429	0.0564437	1.06815
ARHGAP11A__chr15	-0.223763	-2.08367	-1.8599	0.931161	0.0346681	0.0538634	-0.389944	0.46921	0.0309751	1.46007	1.26871
ARHGAP12__chr10	-0.351033	-0.19423	0.156803	0.247249	0.605226	0.713999	0.0615778	0.712055	0.606865	0.218083	0.146302
ARHGAP17__chr16	-0.575247	-1.02088	-0.445633	0.026673	0.00170281	0.0713832	-0.497417	0.00892978	1.57393	2.76883	1.1464
ARHGAP18__chr6	-0.0514761	-0.551503	-0.500027	0.988602	0.336668	0.397695	-0.679281	0.0584228	0.00497837	0.472799	0.40045
ARHGAP19-SLIT1__chr10	-1.20341	-1.27927	-0.0758559	0.218778	0.188183	0.992133	-0.220152	0.685163	0.659997	0.725419	0.00342993
ARHGAP19__chr10	-0.246671	-0.843229	-0.596558	0.635515	0.0413302	0.13501	0.131828	0.55971	0.196874	1.38373	0.869633
ARHGAP1__chr11	-0.103423	0.188253	0.291676	0.517467	0.168438	0.039329	-0.0508898	0.511493	0.286117	0.77356	1.40529
ARHGAP21__chr10	-0.276816	0.210803	0.487619	0.382104	0.551305	0.0980309	0.178833	0.298823	0.417819	0.258608	1.00864
ARHGAP22__chr10	-0.416223	-1.21633	-0.800105	0.480744	0.0267073	0.121754	-0.373649	0.225454	0.318086	1.57337	0.914518
ARHGAP23__chr17	0.324063	1.11746	0.793393	0.139052	0.000579149	0.00356107	0.142518	0.269616	0.856822	3.23721	2.44842
ARHGAP24__chr4	0.0664113	0.286468	0.220056	0.97793	0.677303	0.789665	-0.188207	0.510342	0.00969219	0.169217	0.102557
ARHGAP26__chr5	-0.268292	-0.334683	-0.0663905	0.575554	0.44047	0.963676	-0.0258668	0.905356	0.239914	0.356083	0.0160691
ARHGAP27__chr17	0.384512	0.780453	0.395941	0.853447	0.546618	0.845555	0.541365	0.384834	0.0688235	0.262316	0.0728583
ARHGAP28__chr18	-0.977879	-0.831248	0.146631	0.338548	0.440291	0.971112	-0.40644	0.462441	0.47038	0.35626	0.0127309
ARHGAP29__chr1	0.25012	-0.347296	-0.597416	0.789388	0.643993	0.317219	-0.237546	0.466386	0.102709	0.191119	0.498641
ARHGAP31__chr3	-0.515582	-0.181971	0.333612	0.691028	0.952495	0.851752	0.519379	0.33715	0.160505	0.0211373	0.069687
ARHGAP32__chr11	-0.569376	0.620703	1.19008	0.143328	0.110836	0.00818572	0.173623	0.436038	0.843669	0.955319	2.08694
ARHGAP33__chr19	0.0418473	0.932591	0.890744	0.940517	0.000725331	0.000930767	0.301061	0.0254739	0.0266335	3.13946	3.03116
ARHGAP35__chr19	-0.43886	0.0424228	0.481283	0.125836	0.97241	0.0943543	0.152585	0.358274	0.900194	0.0121507	1.02524
ARHGAP36__chrX	-1.68403	-2.11634	-0.432309	0.0155864	0.00529185	0.57936	-1.16266	0.0138589	1.80725	2.27639	0.237051
ARHGAP39__chr8	-0.0574643	-0.265169	-0.207705	0.988028	0.781691	0.857648	-0.164083	0.623376	0.00523077	0.106965	0.0666908
ARHGAP42__chr11	-0.667765	-0.660142	0.00762361	0.242113	0.248411	0.999762	-0.424029	0.206985	0.615983	0.604828	0.000103216
ARHGAP44__chr17	0.555111	1.45064	0.895527	0.510488	0.0505087	0.2218	0.0868337	0.829938	0.292015	1.29663	0.654038
ARHGAP4__chrX	0.159615	0.333044	0.17343	0.899645	0.647371	0.882981	-0.117768	0.703433	0.0459289	0.188846	0.0540485
ARHGAP5-AS1__chr14	0.306499	0.11864	-0.187859	0.857741	0.976761	0.943085	-0.154098	0.753203	0.0666441	0.0102116	0.0254494
ARHGAP5__chr14	-0.153583	-1.04558	-0.891993	0.8694	0.0307142	0.0570455	-0.132148	0.61034	0.0607801	1.51266	1.24378
ARHGAP6__chrX	0.014233	0.61576	0.601527	0.999828	0.737441	0.747274	0.690916	0.33473	7.44894e-05	0.132273	0.12652
ARHGAP9__chr12	0.625303	0.0451204	-0.580182	0.367776	0.993818	0.414832	-0.188188	0.60732	0.434416	0.00269315	0.382128
ARHGDIA__chr17	0.79009	0.276414	-0.513676	0.0167395	0.398898	0.0898265	-0.196817	0.268118	1.77626	0.399138	1.0466
ARHGDIB__chr12	1.725	0.472551	-1.25245	0.084883	0.758809	0.213239	-0.767787	0.199409	1.07118	0.119868	0.671134
ARHGDIG__chr16	0.493752	0.749171	0.255418	0.557892	0.300323	0.84542	-0.274675	0.48866	0.25345	0.522411	0.0729273
ARHGEF10L__chr1	-0.748862	0.0865635	0.835425	0.14549	0.964489	0.10482	0.00874373	0.975679	0.837168	0.0157026	0.979555
ARHGEF10__chr8	-0.525076	-1.53653	-1.01146	0.728983	0.135649	0.355852	-0.497619	0.401208	0.137282	0.867583	0.44873
ARHGEF11__chr1	0.135222	0.729899	0.594677	0.905494	0.130061	0.223722	-0.171173	0.531647	0.0431146	0.885854	0.650291
ARHGEF12__chr11	-0.0696159	0.759415	0.829031	0.95476	0.0439405	0.0309697	-0.0540342	0.791393	0.020106	1.35714	1.50906
ARHGEF16__chr1	0.461922	-0.156487	-0.618409	0.130423	0.726906	0.0486906	-0.465086	0.0293337	0.884645	0.138522	1.31255
ARHGEF17__chr11	-0.393333	-0.678439	-0.285106	0.572733	0.241618	0.736392	-0.270282	0.408642	0.242048	0.616871	0.132891
ARHGEF18__chr19	0.197435	0.565356	0.367921	0.682395	0.106843	0.314571	0.193739	0.340901	0.165964	0.971256	0.502281
ARHGEF19__chr1	0.486428	-0.163076	-0.649504	0.0607479	0.616975	0.0189957	-0.761591	0.00140354	1.21647	0.209732	1.72134
ARHGEF1__chr19	0.237858	-0.46873	-0.706588	0.948103	0.817329	0.644189	0.0245227	0.969821	0.0231443	0.0876031	0.190987
ARHGEF25__chr12	-0.0860301	0.43573	0.52176	0.978609	0.600741	0.493697	0.145939	0.694506	0.00939057	0.221313	0.306539
ARHGEF26-AS1__chr3	-0.15645	1.2104	1.36685	0.901021	0.0336755	0.0201987	0.954789	0.0168408	0.0452651	1.47269	1.69468
ARHGEF26__chr3	-1.15972	-1.57075	-0.411035	0.272865	0.126552	0.820098	0.702846	0.248545	0.564052	0.897732	0.0861342
ARHGEF28__chr5	0.70537	0.0502345	-0.655136	0.0153154	0.954867	0.0212207	-0.030175	0.837804	1.81487	0.020057	1.67324
ARHGEF2__chr1	0.234756	0.741261	0.506505	0.807928	0.192855	0.413707	0.249706	0.440764	0.0926271	0.714769	0.383307
ARHGEF33__chr2	-0.0888582	0.391752	0.48061	0.96726	0.555706	0.429619	0.403098	0.219998	0.0144569	0.255155	0.366917
ARHGEF37__chr5	0.249444	0.929114	0.67967	0.795132	0.10882	0.250189	0.734559	0.0553593	0.099561	0.963292	0.601732
ARHGEF39__chr9	-0.56551	-1.5682	-1.00269	0.475481	0.0320397	0.150275	-0.367883	0.361666	0.322867	1.49431	0.823114
ARHGEF3__chr3	-0.245258	-0.0891782	0.15608	0.650034	0.941081	0.833472	0.0804052	0.725224	0.187064	0.0263728	0.079109
ARHGEF40__chr14	-0.380475	-1.07029	-0.689812	0.146489	0.00191001	0.0163804	-0.360542	0.0421675	0.834195	2.71896	1.78568
ARHGEF4__chr2	0.0638168	0.234276	0.170459	0.997036	0.961026	0.979108	0.151482	0.838098	0.00128922	0.0172649	0.00916943
ARHGEF6__chrX	-1.28146	-2.00179	-0.720334	0.00585195	0.000566262	0.0686804	0.0471724	0.828986	2.2327	3.24698	1.16317
ARHGEF7__chr13	0.0966253	0.451718	0.355092	0.938934	0.320103	0.470426	-0.0712892	0.769121	0.0273648	0.49471	0.327509
ARHGEF9__chrX	0.0641276	1.04823	0.9841	0.937846	0.00331075	0.0045532	0.324305	0.0777708	0.0278683	2.48007	2.34168
ARID1A__chr1	-0.517084	-0.0685635	0.44852	0.231642	0.967404	0.312797	0.000961417	0.996768	0.635183	0.0143921	0.504737
ARID1B__chr6	-0.18456	0.651658	0.836219	0.602216	0.0283728	0.00934555	0.195419	0.241391	0.220247	1.5471	2.0294
ARID2__chr12	-0.282684	0.00104941	0.283734	0.296219	0.999979	0.294033	0.360611	0.0415578	0.528387	9.0246e-06	0.531603
ARID3A__chr19	0.25397	-0.0283001	-0.28227	0.913601	0.998861	0.894741	-1.06526	0.0809283	0.0392435	0.000494818	0.0483025
ARID3B__chr15	0.17381	-0.225455	-0.399265	0.756421	0.634152	0.288897	-1.20786	0.000808652	0.121236	0.197807	0.539257
ARID4A__chr14	-0.0479555	0.264514	0.312469	0.993069	0.815043	0.754576	0.0682373	0.851187	0.0030206	0.0888195	0.122297
ARID4B__chr1	-0.0307731	0.239654	0.270427	0.976436	0.307397	0.238332	0.25958	0.0748004	0.010356	0.5123	0.622817
ARID5A__chr2	-0.394173	0.663799	1.05797	0.468654	0.167962	0.0349889	0.453148	0.128233	0.329148	0.774789	1.45607
ARID5B__chr10	0.617685	-0.251186	-0.868871	0.164753	0.680428	0.0551641	0.215264	0.39943	0.783167	0.167218	1.25834
ARIH1__chr15	-0.167466	0.353455	0.520921	0.210896	0.0154518	0.0023341	0.0562654	0.457489	0.675932	1.81102	2.63188
ARIH2OS__chr3	-0.0171151	0.23602	0.253136	0.999311	0.879603	0.86322	0.0207274	0.959866	0.000299475	0.0557131	0.0638783
ARIH2__chr3	-0.27449	-0.0597532	0.214737	0.310338	0.93486	0.463288	0.0249907	0.863017	0.508166	0.0292532	0.334149
ARL10__chr5	0.4528	0.725726	0.272926	0.324448	0.0984264	0.631095	-0.0816965	0.739279	0.488855	1.00689	0.199905
ARL11__chr13	0.409883	-0.032828	-0.442711	0.375073	0.992566	0.32745	-0.0231859	0.923071	0.425885	0.0032406	0.484855
ARL13B__chr3	-0.560976	-0.430204	0.130773	0.109307	0.225436	0.840295	-0.044451	0.820238	0.961352	0.646976	0.0755684
ARL14EP__chr11	1.06	-0.251644	-1.31165	0.262756	0.910394	0.155863	-0.657019	0.231774	0.580447	0.0407705	0.807257
ARL15__chr5	0.508639	1.42186	0.913225	0.523394	0.0422982	0.179201	0.452104	0.258491	0.281171	1.37368	0.74666
ARL16__chr17	0.612109	0.820792	0.208683	0.366632	0.199	0.872957	-0.202786	0.57185	0.435769	0.701147	0.0590071
ARL1__chr12	0.35777	-0.0205221	-0.378292	0.283844	0.994843	0.252107	-0.0690093	0.703696	0.54692	0.00224555	0.598416
ARL2BP__chr16	0.091578	0.248497	0.156919	0.727584	0.166083	0.427329	0.0416455	0.678909	0.138117	0.779674	0.369238
ARL2__chr11	0.450711	0.228784	-0.221927	0.0734168	0.398163	0.417349	-0.18676	0.210844	1.1342	0.399939	0.379501
ARL3__chr10	-0.0711986	0.243575	0.314774	0.533324	0.0196203	0.00595618	0.130583	0.0444701	0.273009	1.70729	2.22503
ARL4A__chr7	-0.253538	-0.432398	-0.17886	0.746627	0.458396	0.86151	-0.307966	0.309211	0.126897	0.338759	0.0647396
ARL4C__chr2	-0.756039	0.0935338	0.849573	0.00169333	0.722684	0.000907525	0.263219	0.0346096	2.77126	0.141052	3.04214
ARL4D__chr17	-0.0131801	0.197836	0.211016	0.999269	0.851946	0.833918	0.87965	0.0247457	0.000317469	0.0695881	0.0788766
ARL5A__chr2	-0.124105	-0.13344	-0.00933569	0.827692	0.804478	0.998895	0.242718	0.203779	0.0821312	0.0944856	0.000480073
ARL5B__chr10	0.467064	-0.794985	-1.26205	0.593225	0.268925	0.074189	-0.735044	0.0973112	0.226781	0.57037	1.12966
ARL6IP1__chr16	-0.0313065	-0.612335	-0.581028	0.904376	0.000374573	0.000500982	-0.166442	0.0309867	0.0436509	3.42646	3.30018
ARL6IP4__chr12	0.312819	-0.151953	-0.464772	0.166726	0.588124	0.0456271	-0.225956	0.110473	0.777998	0.230531	1.34078
ARL6IP5__chr3	0.21454	0.417323	0.202783	0.183439	0.0173415	0.211194	0.024027	0.789017	0.736509	1.76091	0.675319
ARL6IP6__chr2	-0.331782	-0.754429	-0.422647	0.404215	0.0449416	0.25785	-0.122666	0.552942	0.393387	1.34735	0.588632
ARL6__chr3	1.16093	0.95441	-0.206518	0.017555	0.0398881	0.770153	0.352451	0.19159	1.7556	1.39916	0.113423
ARL8A__chr1	0.201279	0.697702	0.496423	0.474345	0.0120213	0.0504186	0.356803	0.0358142	0.323905	1.92005	1.29741
ARL8B__chr3	0.48585	0.067591	-0.418259	0.0238422	0.867929	0.043867	0.00550076	0.960873	1.62265	0.0615159	1.35786
ARL9__chr4	0.0475073	-0.980771	-1.02828	0.9973	0.378246	0.348804	-0.0757668	0.895645	0.00117434	0.422225	0.457419
ARMC10__chr7	0.772279	0.0497709	-0.722508	0.0266037	0.971003	0.0349874	-0.289416	0.150142	1.57506	0.0127795	1.45609
ARMC12__chr6	-0.0427219	-0.103263	-0.0605412	0.986561	0.924806	0.973258	0.098164	0.674415	0.00587586	0.0339492	0.0117722
ARMC1__chr8	-0.0429942	-0.139461	-0.0964666	0.979215	0.807542	0.901016	0.000882736	0.996236	0.00912174	0.0928348	0.0452675
ARMC2__chr6	-0.321646	-0.0312974	0.290348	0.57927	0.994338	0.636176	-0.498486	0.0949359	0.237119	0.00246611	0.196423
ARMC4__chr10	-0.402761	-0.517424	-0.114663	0.730881	0.606071	0.973651	-0.230879	0.606073	0.136153	0.217476	0.0115967
ARMC5__chr16	0.397429	-0.512854	-0.910283	0.838404	0.749857	0.438183	-0.639352	0.301197	0.0765469	0.125022	0.358344
ARMC6__chr19	0.173736	0.151581	-0.0221558	0.857937	0.889264	0.997446	-0.387029	0.195261	0.0665445	0.0509693	0.00111067
ARMC7__chr17	0.104043	0.706217	0.602174	0.92924	0.103105	0.164689	0.305584	0.234731	0.0318719	0.986721	0.783335
ARMC8__chr3	-0.201508	-0.289096	-0.0875878	0.705486	0.507751	0.933153	-0.0934819	0.657775	0.151512	0.294349	0.030047
ARMC9__chr2	0.178244	-0.364567	-0.542811	0.887969	0.626388	0.386036	-0.484084	0.169773	0.0516021	0.203157	0.413372
ARMCX1__chrX	0.37205	0.343907	-0.0281426	0.254599	0.299921	0.990095	0.144459	0.43026	0.594143	0.522994	0.00432327
ARMCX2__chrX	0.193897	-0.575241	-0.769137	0.317475	0.0076588	0.00176501	-0.174432	0.12918	0.49829	2.11584	2.75325
ARMCX3__chrX	0.25149	0.215459	-0.0360302	0.283657	0.377646	0.968384	-0.0454557	0.721252	0.547207	0.422915	0.0139523
ARMCX4__chrX	-0.0705078	-0.29731	-0.226802	0.938315	0.380552	0.548802	0.367402	0.071996	0.0276512	0.419586	0.260585
ARMCX5-GPRASP2__chrX	-0.0485043	-0.156605	-0.108101	0.956133	0.64606	0.805486	-0.254424	0.115449	0.0194817	0.189727	0.0939422
ARMCX5__chrX	0.0753867	0.234786	0.159399	0.866805	0.313894	0.553775	0.089755	0.48068	0.0620787	0.503218	0.256667
ARMCX6__chrX	0.0890136	-0.130904	-0.219917	0.458213	0.226271	0.0454087	-0.0300521	0.617326	0.338933	0.645372	1.34286
ARNT2__chr15	-0.274912	0.175458	0.45037	0.652011	0.83374	0.356522	0.504433	0.0857566	0.185745	0.0789693	0.447913
ARNTL2__chr12	0.163316	-0.666238	-0.829554	0.824417	0.108149	0.0507369	-0.479198	0.0738371	0.083853	0.965978	1.29468
ARNTL__chr11	0.0937563	-0.421866	-0.515622	0.992242	0.857471	0.797062	0.0273658	0.967466	0.00338245	0.0667807	0.098508
ARNT__chr1	0.197642	0.298427	0.100785	0.758236	0.550662	0.928178	-0.212445	0.37631	0.120195	0.259115	0.0323685
ARPC1A__chr7	0.114902	0.199957	0.0850548	0.396398	0.109504	0.581214	-0.021967	0.753364	0.401869	0.960572	0.235664
ARPC1B__chr7	0.105733	-0.462471	-0.568203	0.961206	0.507996	0.378933	-0.941279	0.0262583	0.0171837	0.29414	0.421438
ARPC2__chr2	0.279489	0.0881022	-0.191387	0.0340848	0.566463	0.128875	-0.00761853	0.913734	1.46744	0.246828	0.88983
ARPC3__chr12	0.232553	0.575906	0.343353	0.682123	0.163161	0.459398	0.452922	0.0857827	0.166138	0.787383	0.337811
ARPC4__chr3	0.28839	0.100018	-0.188372	0.0845586	0.649517	0.27011	-0.25384	0.0289996	1.07284	0.187409	0.56846
ARPC5L__chr9	0.193748	-0.0368343	-0.230582	0.44172	0.966698	0.332837	0.0230981	0.854891	0.354853	0.0147092	0.477769
ARPC5__chr1	0.306587	-0.031747	-0.338334	0.0446304	0.943202	0.0301165	-0.149404	0.108168	1.35037	0.0253953	1.5212
ARPP19__chr15	0.0464025	-0.0161161	-0.0625186	0.883984	0.984959	0.802413	-0.247922	0.0203819	0.0535557	0.00658169	0.095602
ARPP21__chr3	0.187103	2.33689	2.14979	0.826415	0.000728158	0.00114379	0.692104	0.0351847	0.082802	3.13777	2.94165
ARRB1__chr11	-0.192119	0.209348	0.401467	0.736809	0.698181	0.31709	-0.688258	0.015361	0.132645	0.156032	0.498818
ARRB2__chr17	0.00839959	-0.0977748	-0.106174	0.999705	0.961031	0.954264	-0.256897	0.41926	0.000128268	0.0172628	0.0203314
ARRDC1__chr9	0.210189	-0.213946	-0.424135	0.668495	0.659506	0.252129	-0.150744	0.466476	0.174902	0.180781	0.598377
ARRDC3-AS1__chr5	0.763041	1.88626	1.12322	0.639362	0.129315	0.408452	0.752729	0.301121	0.194253	0.88835	0.388859
ARRDC3__chr5	1.49181	0.941342	-0.550465	9.9e-06	0.000148803	0.00277312	-0.00771552	0.92387	5.00436	3.82739	2.55703
ARRDC4__chr15	0.0998358	0.275871	0.176035	0.976227	0.836212	0.928521	0.406931	0.336275	0.0104494	0.0776836	0.0322084
ARSA__chr22	-0.5923	-0.112325	0.479976	0.652413	0.983642	0.750233	-0.610325	0.292908	0.185477	0.00716274	0.124804
ARSB__chr5	-0.0431436	-0.76314	-0.719997	0.994798	0.272972	0.307076	0.335705	0.38956	0.00226492	0.563882	0.512754
ARSD__chrX	-0.345663	-0.334671	0.0109914	0.748279	0.761358	0.999692	0.138482	0.727718	0.125936	0.118411	0.000133873
ARSG__chr17	0.597278	-0.367151	-0.964429	0.187522	0.473342	0.0392853	-0.200411	0.437685	0.726947	0.324825	1.40577
ARSI__chr5	0.408799	0.0496687	-0.359131	0.64468	0.99304	0.708611	-0.402517	0.306388	0.190656	0.00303343	0.149592
ARSJ__chr4	1.08044	-0.464841	-1.54528	0.0112817	0.225233	0.00190572	-0.542338	0.0364496	1.94763	0.647369	2.71994
ARSK__chr5	-0.701973	-0.0162235	0.685749	0.366089	0.99936	0.380708	0.0780753	0.847443	0.436413	0.00027804	0.419408
ART5__chr11	-0.158266	-0.427129	-0.268863	0.746989	0.189764	0.4614	-0.431407	0.0471399	0.126686	0.721785	0.335923
ARTN__chr1	0.395106	-0.0420325	-0.437139	0.19677	0.975828	0.150534	0.118243	0.494395	0.706041	0.0106268	0.822366
ARV1__chr1	0.248425	0.0861762	-0.162249	0.338464	0.857616	0.599565	0.087349	0.531377	0.470488	0.0667069	0.222164
ARVCF__chr22	0.344598	-0.172422	-0.51702	0.889003	0.970538	0.772233	-0.428335	0.504108	0.0510968	0.0129872	0.112251
ARX__chrX	-0.426999	0.779377	1.20638	0.421727	0.106956	0.0206611	1.40769	0.00158851	0.374968	0.970794	1.68485
AR__chrX	-0.0597624	-1.20148	-1.14172	0.96087	0.00390414	0.0050399	0.0207226	0.912453	0.0173355	2.40847	2.29758
ASAH1__chr8	0.426556	0.254296	-0.17226	0.0811383	0.316629	0.557784	0.00586463	0.96546	1.09077	0.499449	0.253534
ASAP1__chr8	-0.196107	-0.682627	-0.48652	0.153102	0.000662724	0.00395548	-0.072655	0.360301	0.815018	3.17867	2.4028
ASAP2__chr2	-0.252626	0.283954	0.53658	0.355167	0.284625	0.0432101	0.457665	0.0158132	0.449567	0.545726	1.36442
ASAP3__chr1	-0.422004	-0.513289	-0.0912841	0.32251	0.212029	0.938086	-0.242322	0.308272	0.491456	0.673605	0.0277575
ASB11__chrX	-0.624412	0.417458	1.04187	0.199918	0.436531	0.0381502	0.215334	0.43682	0.699148	0.359985	1.4185
ASB12__chrX	-0.153488	-0.129916	0.0235725	0.953939	0.966706	0.99888	-0.614282	0.200113	0.0204796	0.0147058	0.000486881
ASB13__chr10	-1.20461	-1.14382	0.0607924	0.140987	0.162904	0.992944	-0.806229	0.115085	0.850822	0.788069	0.0030751
ASB15__chr7	0.242675	1.33692	1.09425	0.933723	0.204352	0.316067	0.744838	0.23073	0.0297818	0.68962	0.500221
ASB16-AS1__chr17	-0.45529	-0.576541	-0.12125	0.211661	0.110264	0.867952	-0.26374	0.220698	0.674359	0.957567	0.0615042
ASB1__chr2	0.684858	-0.0510507	-0.735908	0.0250549	0.96038	0.0183657	-0.236969	0.173346	1.60111	0.017557	1.73599
ASB3__chr2	0.039787	0.061803	0.022016	0.935189	0.852887	0.979531	0.0203922	0.833089	0.0291006	0.0691087	0.00898167
ASB4__chr7	0.282813	1.00938	0.726567	0.933928	0.46294	0.654333	0.0404201	0.952578	0.0296866	0.334475	0.184201
ASB6__chr9	0.0695382	0.0946343	0.0250961	0.927926	0.87192	0.990196	-0.326839	0.0767788	0.0324865	0.0595233	0.0042788
ASB7__chr15	0.0419172	-0.678553	-0.72047	0.99398	0.28181	0.247866	-0.288221	0.411838	0.00262228	0.550044	0.605782
ASB8__chr12	-0.144897	0.654615	0.799512	0.650033	0.0142599	0.00552768	0.0359377	0.789825	0.187065	1.84588	2.25746
ASCC1__chr10	-0.117955	-0.134451	-0.0164957	0.858237	0.821102	0.996937	-0.23165	0.246708	0.0663925	0.0856028	0.00133241
ASCC2__chr22	0.165747	-0.497608	-0.663355	0.942839	0.611379	0.438446	-0.228267	0.599656	0.0255624	0.21369	0.358084
ASCC3__chr6	0.562196	-0.360586	-0.922782	0.00341552	0.0272076	0.000236155	-0.0240399	0.78021	2.46654	1.56531	3.6268
ASCL1__chr12	0.090678	-0.794526	-0.885204	0.970599	0.182569	0.135681	0.371171	0.286613	0.0129603	0.738573	0.867481
ASF1A__chr6	0.283735	-0.186394	-0.470129	0.332248	0.590515	0.0921033	-0.00928431	0.952255	0.478537	0.228769	1.03572
ASF1B__chr19	-0.626612	-2.13894	-1.51233	0.0413107	8.25e-05	0.000580513	-0.424863	0.036653	1.38394	4.0835	3.23619
ASGR1__chr17	-0.225235	0.523389	0.748624	0.482153	0.0656845	0.0154109	0.192203	0.247411	0.316815	1.18254	1.81217
ASH1L-AS1__chr1	0.244982	-0.359825	-0.604808	0.937911	0.872349	0.690408	-0.269934	0.659895	0.0278383	0.05931	0.160894
ASH1L__chr1	-0.198855	0.474901	0.673755	0.516005	0.072368	0.0180613	0.113823	0.446982	0.287346	1.14045	1.74325
ASH2L__chr8	-0.139399	-0.00677838	0.13262	0.573003	0.998551	0.601492	0.206722	0.10386	0.241843	0.000629798	0.22077
ASIC1__chr12	0.370051	1.28624	0.916189	0.758215	0.0992068	0.248773	0.124869	0.774364	0.120208	1.00346	0.604197
ASIC2__chr17	-0.361851	0.21075	0.5726	0.810784	0.929736	0.606916	0.491395	0.33645	0.0910948	0.0316405	0.216872
ASIC3__chr7	-0.177398	0.539326	0.716724	0.941556	0.59789	0.425197	-0.502795	0.292688	0.0261537	0.223379	0.37141
ASL__chr7	0.397356	-0.513744	-0.9111	0.857303	0.776476	0.481139	-0.416601	0.517373	0.0668659	0.109872	0.317729
ASNA1__chr19	0.0978271	0.0201426	-0.0776846	0.806273	0.990585	0.871424	0.0792264	0.550997	0.093518	0.00410808	0.0597704
ASNSD1__chr2	-0.0635955	-0.300179	-0.236583	0.986584	0.75049	0.833948	-0.123756	0.721636	0.00586595	0.124655	0.0788611
ASNS__chr7	1.04187	1.30214	0.26027	0.000108967	2.99e-05	0.0877211	0.225929	0.031803	3.9627	4.52362	1.0569
ASPHD1__chr16	0.364197	1.13575	0.77155	0.434992	0.0146388	0.0698438	0.560593	0.0470754	0.361519	1.83449	1.15587
ASPHD2__chr22	-0.132502	0.611616	0.744118	0.92489	0.263885	0.164133	-0.173036	0.566745	0.0339097	0.578585	0.784804
ASPH__chr8	-0.134879	-0.656801	-0.521923	0.630135	0.00844623	0.0238931	-0.0310674	0.79713	0.200566	2.07334	1.62173
ASPM__chr1	-0.718159	-1.70605	-0.98789	0.126002	0.0034987	0.0419402	-0.111556	0.672455	0.899622	2.45609	1.37737
ASPRV1__chr2	0.375226	0.508088	0.132862	0.76545	0.623239	0.965716	-0.103663	0.817508	0.116083	0.205345	0.0151508
ASPSCR1__chr17	-0.409111	-1.13275	-0.723639	0.563555	0.0565791	0.219822	-0.0229194	0.943754	0.249064	1.24734	0.657929
ASRGL1__chr11	-0.243993	-0.258758	-0.0147654	0.308164	0.273695	0.994714	-0.00158016	0.990159	0.511218	0.562734	0.00230161
ASS1__chr9	-0.730246	-1.01708	-0.286832	0.0192978	0.00402844	0.346711	-0.464519	0.0234732	1.71449	2.39486	0.460032
ASTE1__chr3	-0.0914017	-0.826208	-0.734806	0.982267	0.30448	0.376368	0.384638	0.388306	0.0077704	0.516442	0.424387
ASTN1__chr1	-0.81997	0.513977	1.33395	0.00209389	0.0200119	0.000145258	0.190113	0.132497	2.67905	1.69871	3.83786
ASTN2__chr9	0.646119	1.95895	1.31283	0.628404	0.0617856	0.207606	0.239392	0.679682	0.201761	1.20911	0.682759
ASUN__chr12	-0.0112872	0.119617	0.130904	0.997718	0.78191	0.746563	0.314798	0.0701689	0.000992225	0.106843	0.126934
ASXL1__chr20	-0.637932	-0.322813	0.315119	0.0243444	0.230794	0.243832	-0.0486959	0.743211	1.6136	0.636775	0.61291
ASXL2__chr2	-0.485903	-0.764531	-0.278628	0.559421	0.280538	0.81547	0.708279	0.102215	0.252261	0.552008	0.0885918
ASXL3__chr18	1.12018	1.45215	0.331969	0.194758	0.091832	0.830124	-0.419369	0.396132	0.710504	1.03701	0.080857
ASZ1__chr7	-0.0355147	0.0729171	0.108432	0.976484	0.905722	0.806833	-0.25803	0.113402	0.0103349	0.0430052	0.0932164
ATAD1__chr10	0.670439	0.791693	0.121254	0.00353392	0.00148942	0.602793	0.039639	0.7024	2.45174	2.82698	0.219832
ATAD2B__chr2	0.026248	0.174005	0.147757	0.993651	0.765255	0.822548	0.0554592	0.790136	0.00276599	0.116194	0.0848388
ATAD2__chr8	-0.355383	-1.46576	-1.11038	0.589514	0.0130352	0.0424179	0.227519	0.452219	0.229506	1.88488	1.37245
ATAD3A__chr1	-0.0599917	-0.513835	-0.453844	0.975563	0.242224	0.313695	0.0946051	0.696035	0.0107449	0.615783	0.503493
ATAD3B__chr1	-0.230876	-0.489555	-0.258679	0.913176	0.678509	0.892639	0.276833	0.57	0.0394454	0.168445	0.0493241
ATAD3C__chr1	0.500176	-0.605912	-1.10609	0.463628	0.343335	0.0704827	-0.187092	0.583981	0.33383	0.464282	1.15192
ATAD5__chr17	-0.00152898	0.0487311	0.0502601	0.999971	0.970957	0.969145	-0.0400717	0.823178	1.26646e-05	0.0127998	0.0136112
ATAT1__chr6	-0.180735	1.06872	1.24946	0.580088	0.00203452	0.000884834	0.436735	0.0215562	0.236506	2.69154	3.05314
ATCAY__chr19	-0.0193931	1.66948	1.68887	0.998409	0.00854562	0.00808716	0.689622	0.0577533	0.000691691	2.06826	2.0922
ATE1__chr10	-0.435274	-1.1773	-0.742031	0.583725	0.06976	0.258628	0.0632067	0.859961	0.233791	1.15639	0.587324
ATF1__chr12	-0.403691	-0.506351	-0.10266	0.239351	0.132983	0.889801	0.00382687	0.983756	0.620965	0.876203	0.0507073
ATF2__chr2	-0.451638	0.353899	0.805538	0.0176575	0.0482759	0.000995075	0.080835	0.419602	1.75307	1.31627	3.00214
ATF3__chr1	1.15045	-0.241701	-1.39215	0.00679323	0.592457	0.0026098	-1.41424	0.000334974	2.16792	0.227344	2.58339
ATF4__chr22	0.409103	0.326625	-0.0824781	0.0399192	0.0902391	0.796174	-0.0323208	0.763625	1.39882	1.04461	0.0989922
ATF5__chr19	0.43214	0.35328	-0.0788594	0.135435	0.229233	0.910479	-0.0653188	0.687873	0.868269	0.639722	0.0407301
ATF6B__chr6	0.232981	0.0407425	-0.192238	0.752892	0.990939	0.821845	0.25715	0.358599	0.123267	0.003953	0.0852102
ATF6__chr1	-0.0214314	0.0464433	0.0678747	0.989807	0.953322	0.903785	0.109427	0.42629	0.00444931	0.0207603	0.043935
ATF7IP2__chr16	-0.372252	-0.954717	-0.582464	0.720394	0.184611	0.47424	-0.182949	0.649838	0.14243	0.733742	0.324001
ATF7IP__chr12	-0.0892378	0.177603	0.266841	0.703363	0.301477	0.107041	0.0247153	0.789341	0.15282	0.520746	0.970449
ATF7__chr12	-0.153138	-0.645676	-0.492538	0.860656	0.144382	0.280153	-0.540037	0.0625764	0.0651704	0.840488	0.552605
ATG10__chr5	0.00670472	-0.305956	-0.312661	0.999953	0.908316	0.904519	-0.821612	0.215353	2.03902e-05	0.0417633	0.0435822
ATG12__chr5	0.140071	-0.00342333	-0.143494	0.843063	0.999895	0.836184	0.0301563	0.886511	0.0741402	4.56069e-05	0.0776982
ATG13__chr11	0.0145283	0.276519	0.261991	0.989741	0.0892873	0.106275	-0.211	0.050833	0.00447827	1.04921	0.973568
ATG14__chr14	-0.217899	-0.154232	0.063667	0.468476	0.667424	0.929622	-0.027201	0.854396	0.329313	0.175598	0.0316937
ATG16L1__chr2	-0.155024	-0.0546138	0.10041	0.388838	0.873573	0.648062	0.233128	0.0396451	0.410231	0.0587007	0.188384
ATG16L2__chr11	-0.292274	0.984422	1.2767	0.860909	0.254497	0.130713	0.515258	0.29776	0.0650427	0.594318	0.883682
ATG2A__chr11	-0.281231	-0.201909	0.0793221	0.66156	0.802331	0.965513	0.126495	0.638697	0.17943	0.0956464	0.0152417
ATG2B__chr14	-0.0895997	0.518051	0.607651	0.942177	0.216029	0.142149	0.239214	0.321524	0.0258673	0.665488	0.847257
ATG3__chr3	-0.0350951	0.132783	0.167878	0.928768	0.401317	0.259499	0.391599	0.00236829	0.0320929	0.396512	0.585864
ATG4A__chrX	0.310947	0.311885	0.000937887	0.580616	0.578879	0.999995	-0.162869	0.529071	0.236111	0.237412	2.3609e-06
ATG4B__chr2	-0.331523	-0.270063	0.0614602	0.162794	0.267246	0.918472	-0.248796	0.0974922	0.788362	0.573088	0.0369339
ATG4C__chr1	-0.15411	-0.720224	-0.566114	0.471357	0.00271429	0.00895975	-0.14791	0.192975	0.32665	2.56634	2.0477
ATG4D__chr19	0.194599	0.646968	0.452369	0.931504	0.495404	0.694606	-0.0385616	0.933046	0.0308153	0.30504	0.158261
ATG5__chr6	0.031065	-0.163612	-0.194677	0.991634	0.798902	0.731237	-0.242564	0.28215	0.00364878	0.0975063	0.135942
ATG7__chr3	0.510948	-0.495223	-1.00617	0.396026	0.41573	0.0726577	-0.329484	0.309398	0.402277	0.381188	1.13872
ATG9A__chr2	0.354405	0.6115	0.257095	0.202786	0.0341361	0.388698	-0.046587	0.762967	0.692963	1.46679	0.410388
ATG9B__chr7	-0.332996	-0.299477	0.0335185	0.700896	0.747735	0.996181	-0.0928509	0.78687	0.154346	0.126252	0.00166194
ATHL1__chr11	-0.569144	-0.738179	-0.169035	0.0978533	0.0383644	0.74343	0.0138776	0.942157	1.00942	1.41607	0.12876
ATIC__chr2	0.0058256	-0.724369	-0.730195	0.999543	0.026971	0.0260789	-0.397484	0.0527635	0.000198698	1.5691	1.58371
ATL1__chr14	0.167482	0.827478	0.659996	0.536021	0.00349664	0.0105582	0.0687858	0.592685	0.270818	2.45635	1.97641
ATL2__chr2	-0.462633	-0.794632	-0.331999	0.764696	0.481961	0.868285	-0.620228	0.285539	0.116511	0.316988	0.0613377
ATL3__chr11	0.869071	-0.875702	-1.74477	0.287594	0.283163	0.0346945	-0.381499	0.401688	0.54122	0.547964	1.45974
ATMIN__chr16	0.0023124	0.17094	0.168627	0.99982	0.428152	0.436744	0.0504986	0.645973	7.81982e-05	0.368402	0.359773
ATM__chr11	-0.527022	-0.391934	0.135088	0.0227006	0.0720945	0.628082	0.312699	0.0350573	1.64396	1.1421	0.201984
ATN1__chr12	-0.370619	0.0109778	0.381597	0.202934	0.998144	0.188609	0.264227	0.137856	0.692646	0.000806743	0.724439
ATOH7__chr10	0.318895	-0.19161	-0.510506	0.495364	0.760764	0.213076	-0.207703	0.375382	0.305076	0.11875	0.671466
ATOH8__chr2	-0.645854	-1.10799	-0.462136	0.5619	0.234519	0.733987	0.451967	0.392376	0.250341	0.629821	0.134312
ATOX1__chr5	0.279511	0.209648	-0.0698634	0.337104	0.516765	0.922094	-0.0690619	0.656558	0.472237	0.286707	0.0352249
ATP10A__chr15	-0.400482	-1.27039	-0.869912	0.110887	0.00060471	0.00444668	-0.746193	0.00143697	0.955117	3.21845	2.35196
ATP10D__chr4	-0.647415	-1.41514	-0.767729	0.442744	0.0652954	0.336034	-0.133621	0.752637	0.353848	1.18512	0.473617
ATP11A__chr13	-0.116639	-0.861503	-0.744864	0.934008	0.088256	0.138579	-0.444151	0.14987	0.0296496	1.05426	0.858302
ATP11B__chr3	0.291289	-0.0773136	-0.368603	0.656069	0.96873	0.522818	-0.497818	0.106434	0.18305	0.0137972	0.281649
ATP11C__chrX	0.0825402	-0.00487508	-0.0874153	0.84176	0.999381	0.824867	-0.164304	0.215891	0.0748117	0.000268815	0.0836159
ATP13A1__chr19	0.165766	-0.177942	-0.343709	0.831502	0.809265	0.48577	-0.180762	0.4623	0.0801368	0.0919091	0.31357
ATP13A2__chr1	-0.0048758	0.875843	0.880719	0.99917	0.00105649	0.00102537	0.0423274	0.694233	0.000360546	2.97613	2.98912
ATP13A3__chr3	0.306467	-0.194266	-0.500733	0.201629	0.472161	0.0420015	-0.224677	0.128107	0.695446	0.32591	1.37674
ATP1A1OS__chr1	-0.147455	-0.204339	-0.0568841	0.908775	0.834428	0.985667	-0.401765	0.21062	0.0415438	0.0786113	0.0062696
ATP1A1__chr1	0.319492	-0.0549781	-0.37447	0.0904592	0.897705	0.051675	-0.0136505	0.896428	1.04355	0.0468663	1.28672
ATP1A2__chr1	-1.2677	-1.77415	-0.506452	0.0604244	0.015315	0.51377	0.401221	0.301579	1.21879	1.81488	0.289231
ATP1A3__chr19	0.255438	2.04058	1.78514	0.643681	0.000753953	0.0015474	0.465415	0.0836051	0.191329	3.12266	2.8104
ATP1B1__chr1	0.119632	0.556296	0.436663	0.779156	0.042733	0.100897	0.205114	0.198987	0.108376	1.36924	0.99612
ATP1B2__chr17	-0.819975	-0.315787	0.504189	0.176024	0.717728	0.457865	0.636775	0.0961836	0.754428	0.14404	0.339263
ATP1B3__chr3	0.357319	-0.308605	-0.665925	0.035081	0.0614523	0.00186946	-0.322776	0.00988394	1.45493	1.21146	2.72828
ATP2A1__chr16	-0.269089	-1.4137	-1.14461	0.671497	0.0085964	0.0224062	-0.803353	0.0182132	0.172956	2.06568	1.64963
ATP2A2__chr12	0.168934	0.094664	-0.0742703	0.275706	0.626052	0.743024	-0.167259	0.0830643	0.559553	0.20339	0.128997
ATP2B1__chr12	0.0148443	0.178226	0.163382	0.994201	0.478155	0.531647	0.152092	0.244709	0.00252581	0.320431	0.274377
ATP2B2__chr3	-0.553899	1.12362	1.67752	0.386701	0.0620382	0.0117885	1.28673	0.00665533	0.412625	1.20734	1.92854
ATP2B3__chrX	-0.0730322	1.09859	1.17162	0.983761	0.0903632	0.0726457	0.0499343	0.889832	0.00711028	1.04401	1.13879
ATP2B4__chr1	-0.505813	-0.676622	-0.170809	0.161324	0.0644082	0.75966	-0.0221628	0.912269	0.792301	1.19106	0.119381
ATP2C1__chr3	0.176936	0.454431	0.277495	0.601649	0.0925811	0.326067	0.0296767	0.843533	0.220657	1.03348	0.486694
ATP5A1__chr18	0.0399952	0.0401333	0.000138148	0.697132	0.695497	0.999995	-0.0744836	0.105641	0.156685	0.157704	1.98986e-06
ATP5B__chr12	0.387128	0.191929	-0.195198	0.0155995	0.189433	0.181386	0.0860843	0.310826	1.80689	0.722545	0.741397
ATP5C1__chr10	0.230243	0.133632	-0.0966118	0.14111	0.443549	0.635841	-0.0284456	0.745524	0.850442	0.353058	0.196652
ATP5D__chr19	0.310072	0.362965	0.0528931	0.391826	0.295211	0.968551	-0.170683	0.376883	0.406907	0.529867	0.0138773
ATP5EP2__chr13	0.248578	0.117093	-0.131485	0.0186706	0.2363	0.177908	-0.352603	0.000503446	1.72884	0.626537	0.749805
ATP5E__chr20	-0.0145298	0.279826	0.294356	0.995479	0.264562	0.236548	-0.278432	0.0773585	0.00196804	0.577472	0.626081
ATP5F1__chr1	0.301617	0.0241043	-0.277513	0.0127847	0.939142	0.0185888	0.0200884	0.740925	1.89331	0.0272685	1.73075
ATP5G1__chr17	0.29023	-0.122214	-0.412444	0.0938651	0.558942	0.0250238	0.0999218	0.320833	1.0275	0.252633	1.60165
ATP5G2__chr12	0.0988171	-0.248833	-0.34765	0.727199	0.201009	0.0744512	-0.156332	0.180809	0.138347	0.696784	1.12813
ATP5G3__chr2	0.270512	-0.106725	-0.377237	0.0281015	0.398876	0.00619523	-0.106239	0.138862	1.55127	0.399162	2.20794
ATP5H__chr17	0.191491	-0.0632805	-0.254771	0.207259	0.803387	0.0915735	0.097667	0.270414	0.683488	0.095075	1.03823
ATP5I__chr4	0.0549029	0.0370524	-0.0178505	0.942556	0.97327	0.993709	0.252888	0.112635	0.0256927	0.0117665	0.00274075
ATP5J2-PTCD1__chr7	0.374186	-0.332171	-0.706357	0.625	0.686265	0.243065	-0.203493	0.545477	0.20412	0.163508	0.614277
ATP5J2__chr7	0.0573246	-0.282606	-0.339931	0.836111	0.0653499	0.0322169	-0.0670775	0.438689	0.0777359	1.18476	1.49192
ATP5J__chr21	0.27416	0.158442	-0.115718	0.058718	0.280711	0.474874	0.056161	0.488809	1.23123	0.55174	0.323422
ATP5L2__chr22	0.130939	0.852006	0.721067	0.924029	0.104702	0.170234	-0.0356698	0.902964	0.0343145	0.980044	0.768955
ATP5L__chr11	0.219063	0.177552	-0.0415111	0.166927	0.275449	0.916506	0.0696993	0.441496	0.777474	0.559958	0.0378646
ATP5O__chr21	0.233825	0.255966	0.0221408	0.0244166	0.0164631	0.93637	-0.0228543	0.676004	1.61231	1.78349	0.0285527
ATP5SL__chr19	0.187666	-0.125714	-0.31338	0.31383	0.561622	0.0810955	-0.205501	0.0747579	0.503305	0.250556	1.091
ATP5S__chr14	-0.12728	-0.328073	-0.200793	0.929491	0.634678	0.836369	0.147931	0.620598	0.031755	0.197446	0.077602
ATP6AP1L__chr5	-0.385462	-0.599005	-0.213543	0.674522	0.417433	0.881099	-0.72698	0.0899285	0.171004	0.379414	0.0549751
ATP6AP1__chrX	0.48309	0.794146	0.311055	0.0136162	0.00113047	0.0795652	0.146998	0.169646	1.86594	2.94674	1.09928
ATP6AP2__chrX	0.278832	0.0359542	-0.242877	0.250123	0.971125	0.330829	-0.0445211	0.737942	0.601847	0.012725	0.480396
ATP6V0A1__chr17	0.841929	1.38427	0.542338	0.000790446	4.79e-05	0.0076355	0.0462304	0.638453	3.10213	4.31951	2.11716
ATP6V0A2__chr12	-0.0351536	-0.356885	-0.321732	0.951463	0.050334	0.0733097	0.218855	0.061068	0.0216081	1.29814	1.13484
ATP6V0B__chr1	0.558575	0.710409	0.151834	0.0165829	0.00534166	0.553994	-0.0442182	0.71097	1.78034	2.27232	0.256495
ATP6V0C__chr16	0.538821	0.719945	0.181125	0.00290801	0.000622045	0.209841	0.0250896	0.754057	2.5364	3.20618	0.67811
ATP6V0D1__chr16	0.132476	0.583616	0.45114	0.479901	0.00393348	0.0135827	0.174351	0.0946151	0.318848	2.40522	1.86701
ATP6V0E1__chr5	0.609722	-0.0312289	-0.640951	0.00300054	0.9542	0.00231848	-0.176984	0.0883914	2.5228	0.0203606	2.6348
ATP6V0E2-AS1__chr7	-0.294466	0.755971	1.05044	0.807815	0.305915	0.138533	0.0287254	0.942106	0.0926882	0.514399	0.858448
ATP6V0E2__chr7	0.289183	0.805774	0.516591	0.377416	0.0161022	0.091409	-0.13062	0.453641	0.42318	1.79311	1.03901
ATP6V1A__chr3	-0.0141786	0.660612	0.67479	0.968601	7.32e-05	6.48e-05	0.0857884	0.124087	0.0138551	4.13559	4.18873
ATP6V1B1__chr2	-0.763558	-0.254565	0.508994	0.48896	0.915092	0.712028	-0.627173	0.268313	0.310727	0.0385355	0.147503
ATP6V1B2__chr8	0.360687	0.716308	0.355621	0.099487	0.00584829	0.104075	0.0980872	0.433418	1.00223	2.23297	0.982652
ATP6V1C1__chr8	0.262873	0.536878	0.274005	0.521778	0.123959	0.496315	0.276536	0.189088	0.282514	0.906723	0.304243
ATP6V1D__chr14	0.457529	0.224407	-0.233122	0.125858	0.523826	0.500477	-0.0965844	0.568009	0.90012	0.280813	0.300616
ATP6V1E1__chr22	0.893454	0.742673	-0.150782	0.000756664	0.0020323	0.469367	-0.00584145	0.954587	3.1211	2.69201	0.328488
ATP6V1E2__chr2	0.521578	-0.284678	-0.806256	0.0514312	0.293229	0.00787363	-0.421492	0.0235758	1.28877	0.532794	2.10383
ATP6V1F__chr7	0.13951	0.745669	0.606159	0.302662	0.000304284	0.000951375	0.0260735	0.720948	0.519042	3.51672	3.02165
ATP6V1G1__chr9	0.134101	0.348362	0.214261	0.24642	0.00803716	0.06292	0.145492	0.0534656	0.608324	2.0949	1.20121
ATP6V1G2__chr6	0.358106	1.46378	1.10567	0.277649	0.00105061	0.00452462	0.222405	0.241771	0.556504	2.97856	2.34442
ATP6V1H__chr8	0.390215	0.549534	0.159319	0.0626316	0.0155688	0.50651	0.039843	0.730479	1.20321	1.80775	0.295412
ATP7A__chrX	-0.24147	-0.146938	0.0945315	0.679533	0.861497	0.93929	-0.361801	0.163289	0.16779	0.0647461	0.0272004
ATP7B__chr13	-0.30571	0.211081	0.516791	0.821282	0.908897	0.588135	0.311037	0.477489	0.0855075	0.0414852	0.230523
ATP8A1__chr4	-0.360323	1.17355	1.53388	0.173068	0.00121314	0.000279096	0.353232	0.0462491	0.761783	2.91609	3.55425
ATP8A2__chr13	-0.105421	0.410432	0.515853	0.9757	0.703063	0.583524	-0.392524	0.371667	0.0106838	0.153006	0.233941
ATP8B2__chr1	-0.347306	-1.35146	-1.00416	0.846688	0.155755	0.311648	-0.639818	0.255288	0.0722767	0.807559	0.506336
ATP9A__chr20	-0.113811	1.39339	1.5072	0.776921	0.000364175	0.000234671	0.145774	0.319651	0.109623	3.43869	3.62954
ATP9B__chr18	-0.208789	-1.15403	-0.94524	0.895138	0.101904	0.18141	-0.290848	0.46937	0.0481102	0.991808	0.741339
ATPAF1__chr1	-0.171688	-0.377016	-0.205329	0.285148	0.0234985	0.189219	0.253356	0.0226329	0.544929	1.62896	0.723034
ATPAF2__chr17	0.374404	-0.364507	-0.738911	0.473071	0.489763	0.108131	-0.243248	0.36052	0.325074	0.310014	0.96605
ATPBD4__chr15	-0.137835	-2.18399	-2.04615	0.973587	0.0297235	0.0386916	-0.832712	0.153355	0.0116251	1.5269	1.41238
ATPIF1__chr1	0.0935986	-0.127083	-0.220681	0.487132	0.297151	0.06417	0.15169	0.0523014	0.312353	0.527023	1.19267
ATRAID__chr2	-0.00503572	-0.888575	-0.883539	0.999678	0.0125518	0.0128835	-0.391414	0.0611274	0.000139722	1.90129	1.88997
ATRIP__chr3	0.144998	0.0691611	-0.075837	0.968245	0.992654	0.991176	-0.406113	0.437159	0.0140145	0.00320211	0.00384914
ATRNL1__chr10	-0.438719	0.579299	1.01802	0.128222	0.0501946	0.00405888	0.418838	0.0349125	0.892037	1.29934	2.39159
ATRN__chr20	-0.319727	0.0208301	0.340557	0.703705	0.998417	0.673269	0.74992	0.0559635	0.15261	0.000688175	0.171811
ATRX__chrX	-0.508084	0.546715	1.0548	0.00864783	0.00607084	0.000181694	0.237642	0.0383219	2.06309	2.21675	3.74066
ATR__chr3	-0.0526653	-1.21931	-1.16665	0.993337	0.0956813	0.1101	-0.455513	0.287445	0.00290322	1.01917	0.958212
ATXN10__chr22	-0.0154276	0.398047	0.413474	0.98722	0.0177949	0.0150157	0.355512	0.00500724	0.0055859	1.7497	1.82345
ATXN1L__chr16	0.289986	-0.205685	-0.49567	0.580749	0.751271	0.254244	-0.276977	0.269099	0.236012	0.124203	0.594749
ATXN1__chr6	-0.328681	0.95917	1.28785	0.785221	0.199551	0.0844123	0.784276	0.0955327	0.105008	0.699947	1.07359
ATXN2L__chr16	-0.0618999	-0.662417	-0.600517	0.996285	0.671618	0.718208	-0.525731	0.425411	0.00161632	0.172877	0.14375
ATXN2__chr12	-0.45916	-0.0382063	0.420954	0.00419046	0.898209	0.00644223	0.00433853	0.952623	2.37774	0.0466228	2.19096
ATXN3__chr14	-0.102856	0.19066	0.293517	0.899315	0.704996	0.463265	-0.310276	0.153	0.0460882	0.151813	0.33417
ATXN7L1__chr7	-0.236438	0.456488	0.692926	0.917294	0.733752	0.511879	0.439971	0.398612	0.0374915	0.13445	0.290833
ATXN7L2__chr1	-0.515363	0.0541638	0.569527	0.195154	0.976246	0.149639	0.146677	0.513633	0.709622	0.0104409	0.824956
ATXN7L3B__chr12	0.092488	0.766794	0.674306	0.731721	0.00165112	0.00322041	0.156469	0.160215	0.135655	2.78222	2.49209
ATXN7L3__chr17	0.135611	0.859965	0.724354	0.695091	0.00433893	0.00999156	-0.029242	0.832152	0.157959	2.36262	2.00037
ATXN7__chr3	-0.431429	-1.17429	-0.742863	0.769325	0.213325	0.487833	-0.480504	0.373056	0.11389	0.670959	0.311729
AUH__chr9	-0.0870454	0.0486087	0.135654	0.797524	0.930109	0.593424	-0.0772768	0.504206	0.0982562	0.0314661	0.226635
AUNIP__chr1	-0.750199	-1.40083	-0.650629	0.306217	0.0519989	0.393989	-0.206137	0.603948	0.513971	1.28401	0.404516
AUP1__chr2	0.0141115	-0.474574	-0.488685	0.98584	0.00395013	0.00340521	-0.0353722	0.638627	0.00619372	2.40339	2.46786
AURKAIP1__chr1	0.169867	-0.148045	-0.317912	0.404154	0.490531	0.0902052	-0.0738724	0.487717	0.393453	0.309334	1.04477
AURKA__chr20	-0.504669	-1.60013	-1.09546	0.0534778	0.000184657	0.00148381	-0.452292	0.0162444	1.27183	3.73364	2.82862
AURKB__chr17	-0.839649	-2.07261	-1.23297	0.0035287	2.33e-05	0.000455634	-0.309612	0.0464743	2.45239	4.63238	3.34138
AURKC__chr19	0.0834361	-0.136484	-0.21992	0.967082	0.915106	0.798537	-0.420034	0.178455	0.0145365	0.0385286	0.0977048
AUTS2__chr7	-0.756514	0.870397	1.62691	0.00422335	0.00205736	6.43e-05	0.510256	0.00449725	2.37434	2.68669	4.19152
AVEN__chr15	0.0430935	-0.941615	-0.984709	0.99262	0.0977107	0.0843282	0.16042	0.615923	0.00321698	1.01006	1.07403
AVIL__chr12	0.229444	-0.374723	-0.604168	0.814131	0.594952	0.302288	-0.0481655	0.878262	0.0893055	0.225518	0.519579
AVL9__chr7	0.148689	-0.0589279	-0.207617	0.955881	0.992892	0.916369	0.00408162	0.992609	0.0195962	0.00309807	0.0379298
AVPI1__chr10	-0.122091	-1.02363	-0.901535	0.972937	0.22581	0.297166	-0.58486	0.237518	0.0119154	0.646256	0.527002
AXIN1__chr16	-0.217348	-0.348873	-0.131526	0.667819	0.388591	0.856933	-0.371198	0.113214	0.175341	0.410507	0.067053
AXIN2__chr17	-0.715662	0.30161	1.01727	0.0114687	0.238158	0.00200521	0.799778	0.00100822	1.94049	0.623135	2.69784
AXL__chr19	0.683973	-1.00322	-1.6872	0.0363185	0.00657891	0.000430034	-0.652752	0.00804423	1.43987	2.18185	3.3665
AZI1__chr17	-0.552586	-0.218058	0.334528	0.427673	0.861092	0.71141	-0.103971	0.76843	0.368889	0.0649507	0.14788
AZI2__chr3	0.312579	0.267377	-0.0452026	0.472098	0.567075	0.982319	-0.00225871	0.991561	0.325968	0.24636	0.00774736
AZIN1__chr8	0.248238	0.036517	-0.211721	0.0262903	0.859863	0.0496608	-0.142824	0.0441068	1.5802	0.0655709	1.30399
AZU1__chr19	0.437498	0.679869	0.242372	0.441804	0.185402	0.759008	-0.187929	0.517282	0.35477	0.731885	0.119754
B2M__chr15	0.776011	-0.505405	-1.28142	0.00396592	0.0288636	0.000269455	-0.602895	0.00211745	2.40166	1.53965	3.56951
B3GALNT1__chr3	0.79383	1.17711	0.383276	0.119839	0.0289893	0.523484	0.96968	0.0120429	0.9214	1.53776	0.281096
B3GALNT2__chr1	-0.221314	-0.971913	-0.750599	0.65723	0.0172366	0.0499667	-0.395687	0.0948469	0.182283	1.76355	1.30132
B3GALT2__chr1	-0.344058	1.69167	2.03573	0.735451	0.0217144	0.00939467	0.202315	0.600811	0.133446	1.66325	2.02712
B3GALT4__chr6	-0.430299	-0.485099	-0.0548002	0.51659	0.441956	0.988077	-0.133248	0.675549	0.286854	0.354621	0.00520918
B3GALT6__chr1	0.0236108	0.277161	0.253551	0.962563	0.0481893	0.0668707	0.121624	0.146938	0.0165707	1.31705	1.17476
B3GALTL__chr13	-0.120253	-1.19426	-1.07401	0.911917	0.0150869	0.0240245	0.167487	0.508311	0.0400446	1.8214	1.61935
B3GAT1__chr11	-0.277507	0.338101	0.615607	0.558604	0.437083	0.116221	0.165712	0.459242	0.252896	0.359436	0.934717
B3GAT3__chr11	0.284944	-0.248785	-0.533729	0.0967644	0.146029	0.00745464	-0.0256684	0.78855	1.01428	0.835561	2.12757
B3GNT1__chr11	-0.207601	0.130722	0.338323	0.548723	0.77657	0.250389	0.165815	0.323552	0.260647	0.10982	0.601384
B3GNT2__chr2	0.533154	-0.0903016	-0.623455	0.507708	0.978434	0.409729	-0.572308	0.172954	0.294386	0.00946859	0.387504
B3GNT4__chr12	0.436422	0.133502	-0.30292	0.30624	0.875186	0.532895	-0.224908	0.344319	0.513939	0.0578998	0.273358
B3GNT5__chr3	-0.479121	-0.500481	-0.0213597	0.470695	0.443297	0.998294	-0.0906951	0.781966	0.32726	0.353305	0.000741653
B3GNT7__chr2	-0.2752	0.346265	0.621465	0.796193	0.70254	0.363458	0.37872	0.311413	0.0989814	0.153329	0.439546
B3GNTL1__chr17	0.490854	-0.415715	-0.906569	0.616472	0.701254	0.246484	-0.712128	0.133293	0.210086	0.154125	0.608211
B4GALNT1__chr12	0.345401	0.697255	0.351854	0.871811	0.592909	0.86742	-0.342099	0.562821	0.0595778	0.227012	0.0617705
B4GALNT4__chr11	-0.667978	0.236441	0.904419	0.00625541	0.264332	0.00132336	0.157255	0.204481	2.20374	0.577851	2.87832
B4GALT1__chr9	0.421464	-0.83889	-1.26035	0.627693	0.217494	0.0646165	-1.00409	0.0314842	0.202253	0.662553	1.18966
B4GALT2__chr1	-0.0133418	-0.0590174	-0.0456756	0.995348	0.91402	0.947259	0.0465027	0.708097	0.00202487	0.0390444	0.023531
B4GALT3__chr1	0.134559	0.309414	0.174855	0.778544	0.322283	0.662962	0.0811803	0.629076	0.108717	0.491763	0.178511
B4GALT4__chr3	0.0116619	-0.502536	-0.514198	0.999621	0.532481	0.518552	-0.35987	0.360144	0.000164476	0.273696	0.285208
B4GALT5__chr20	0.12497	0.192768	0.0677977	0.634099	0.372856	0.867966	-0.689242	0.0006928	0.197843	0.428459	0.0614975
B4GALT6__chr18	-0.697358	-1.50475	-0.807389	0.473822	0.0811446	0.381617	-0.803694	0.130045	0.324385	1.09074	0.418372
B4GALT7__chr5	0.0597396	-1.12261	-1.18235	0.995875	0.305613	0.275211	-0.67771	0.274093	0.00179537	0.514828	0.560334
B9D1__chr17	-0.101579	-0.110138	-0.00855855	0.948875	0.940262	0.999624	0.7805	0.0267543	0.0227909	0.0267512	0.000163246
B9D2__chr19	-0.103421	-0.27226	-0.16884	0.922472	0.595552	0.81033	0.44662	0.0877359	0.0350468	0.22508	0.091338
BAALC__chr8	-0.762053	-0.536165	0.225887	0.156998	0.346622	0.80398	1.36006	0.00323435	0.804105	0.460143	0.0947547
BAAT__chr9	0.104089	0.813286	0.709196	0.984998	0.447583	0.532394	-0.0830809	0.87657	0.00656445	0.349126	0.273767
BABAM1__chr19	0.257065	-0.176345	-0.433409	0.459702	0.67608	0.161095	-0.417619	0.0447867	0.337524	0.170002	0.792918
BACE1__chr11	-0.15316	0.171126	0.324286	0.597773	0.532875	0.161799	-7.42e-05	0.999541	0.223464	0.273375	0.791025
BACE2__chr21	-0.234057	-1.04346	-0.809404	0.923932	0.279967	0.436228	-0.486726	0.368869	0.03436	0.552893	0.360286
BACH1__chr21	-0.40676	0.255204	0.661963	0.212151	0.491534	0.04623	0.228001	0.234564	0.673355	0.308447	1.33508
BACH2__chr6	-0.38507	1.23955	1.62462	0.483806	0.0179855	0.00503906	0.57314	0.0673822	0.315329	1.74508	2.29765
BAD__chr11	0.229288	0.441132	0.211844	0.116691	0.00871986	0.14725	0.142347	0.118437	0.932963	2.05949	0.831946
BAG1__chr9	-0.0452567	-0.0660161	-0.0207593	0.859932	0.731814	0.968113	0.0934479	0.22865	0.0655358	0.135599	0.0140739
BAG2__chr6	-0.288139	-0.923471	-0.635333	0.634668	0.0525802	0.173744	-0.00996295	0.969389	0.197453	1.27918	0.76009
BAG3__chr10	0.382677	-1.73609	-2.11876	0.756992	0.0375973	0.0161848	-0.944197	0.0701361	0.120909	1.42484	1.79089
BAG4__chr8	-0.341741	-0.694293	-0.352552	0.573804	0.161553	0.555543	-0.0382876	0.889805	0.241236	0.791686	0.255282
BAG5__chr14	-0.123069	-0.109125	0.0139448	0.693293	0.746948	0.995006	3.34e-05	0.999786	0.159083	0.12671	0.00217428
BAG6__chr6	0.148146	0.427933	0.279787	0.588744	0.0568185	0.208492	-0.0423657	0.731538	0.230074	1.24551	0.680911
BAHCC1__chr17	-0.258594	0.871719	1.13031	0.527704	0.0200927	0.00601775	0.222248	0.275989	0.27761	1.69696	2.22057
BAHD1__chr15	0.0193609	0.160387	0.141026	0.994358	0.6943	0.751274	-0.205039	0.236669	0.00245709	0.158453	0.124201
BAI1__chr8	-0.202277	0.38391	0.586187	0.664026	0.28192	0.0913227	0.170358	0.392581	0.177815	0.549873	1.03942
BAI2__chr1	-0.30436	0.111617	0.415977	0.307483	0.827798	0.146328	0.336382	0.0704399	0.512179	0.0820754	0.834672
BAI3__chr6	-0.848729	-0.150988	0.697741	0.323314	0.957654	0.445628	0.835837	0.105225	0.490375	0.0187915	0.351027
BAIAP2-AS1__chr17	-0.520261	0.536809	1.05707	0.192022	0.177145	0.0154636	0.349483	0.150329	0.716648	0.751672	1.81069
BAIAP2L1__chr7	-0.607312	-0.618951	-0.0116395	0.568437	0.557283	0.999771	-0.808673	0.13365	0.245318	0.253924	9.94052e-05
BAIAP2L2__chr22	0.0842928	0.110692	0.0263996	0.982603	0.970253	0.998275	0.313732	0.446465	0.00762181	0.013115	0.000749638
BAIAP2__chr17	0.0461007	0.141214	0.0951129	0.973488	0.784362	0.893421	-0.110237	0.540951	0.0116696	0.105484	0.0489437
BAIAP3__chr16	-0.61382	0.165086	0.778907	0.475435	0.9412	0.326473	0.366989	0.39919	0.322909	0.0263181	0.486153
BAK1__chr6	0.853232	-0.643454	-1.49669	0.400814	0.574512	0.109182	-1.18061	0.0559576	0.397058	0.240701	0.961851
BAMBI__chr10	-0.0377535	-1.03429	-0.996541	0.99693	0.181981	0.199982	0.405071	0.364236	0.00133516	0.739974	0.699009
BANCR__chr9	0.381198	0.626301	0.245103	0.613409	0.310739	0.808935	0.0361583	0.912868	0.21225	0.507604	0.0920864
BANF1__chr11	-0.275796	-0.675265	-0.399469	0.0302539	0.000349061	0.0056135	-0.109819	0.140181	1.51922	3.4571	2.25077
BANP__chr16	0.570113	0.536368	-0.0337451	0.651748	0.682505	0.998386	-0.238798	0.655537	0.18592	0.165894	0.000701349
BAP1__chr3	-0.0720419	0.0198144	0.0918563	0.956405	0.99661	0.930417	0.0710255	0.742119	0.0193583	0.0014748	0.0313223
BARD1__chr2	-0.734591	-2.2657	-1.53111	0.256874	0.0037854	0.0237724	-0.37746	0.307768	0.590281	2.42189	1.62393
BASP1__chr5	0.088568	1.39691	1.30834	0.884641	0.000702574	0.00100253	0.552377	0.010837	0.053233	3.15331	2.9989
BATF3__chr1	1.26036	0.271655	-0.988707	0.0667399	0.819522	0.145056	-0.0988944	0.794352	1.17561	0.0864392	0.838465
BAX__chr19	0.952913	0.491689	-0.461224	0.00676524	0.101224	0.123404	-0.361888	0.0645919	2.16972	0.994717	0.908671
BAZ1A__chr14	0.2629	-0.274743	-0.537643	0.605494	0.580487	0.183974	0.206209	0.375431	0.21789	0.236208	0.735244
BAZ1B__chr7	-0.273968	-0.51212	-0.238152	0.141708	0.0135393	0.205563	-0.202532	0.0885684	0.848607	1.8684	0.687056
BAZ2A__chr12	-0.160812	0.117497	0.278309	0.906918	0.948792	0.753237	0.201405	0.539057	0.0424318	0.0228291	0.123068
BAZ2B__chr2	-0.631272	0.306026	0.937298	0.00562906	0.10946	0.000716207	0.314073	0.0218432	2.24956	0.960743	3.14496
BBC3__chr19	0.84616	0.275865	-0.570295	0.0054112	0.294826	0.0323879	-0.306683	0.0648119	2.26671	0.530434	1.48962
BBIP1__chr10	-0.0764782	-0.616831	-0.540353	0.976675	0.289714	0.370213	-0.345375	0.295173	0.01025	0.538031	0.431548
BBOX1__chr11	-0.665761	0.135415	0.801177	0.323885	0.945227	0.218703	0.966627	0.0308354	0.48961	0.0244638	0.660145
BBS10__chr12	0.176345	0.480286	0.303941	0.906568	0.517031	0.75409	0.182987	0.608253	0.0425996	0.286483	0.122577
BBS12__chr4	0.0201591	-0.0608741	-0.0810332	0.994259	0.949246	0.912406	0.204553	0.250897	0.00250064	0.0226211	0.0398119
BBS1__chr11	-0.352885	-0.133682	0.219203	0.378784	0.851573	0.661384	-0.225974	0.300372	0.421608	0.0697779	0.179546
BBS2__chr16	-1.08435	-1.15039	-0.0660399	0.313624	0.278729	0.994743	-0.092912	0.871685	0.503591	0.554818	0.00228911
BBS4__chr15	0.155053	0.0732558	-0.0817971	0.760105	0.938472	0.924074	0.0622714	0.734546	0.119127	0.0275786	0.0342931
BBS5__chr2	0.0507755	-0.820147	-0.870922	0.996764	0.475564	0.437835	-0.550591	0.34768	0.00140782	0.322791	0.358689
BBS7__chr4	0.00121605	-0.281902	-0.283118	0.999988	0.565181	0.562654	-0.00212055	0.992461	5.09233e-06	0.247813	0.249758
BBS9__chr7	0.0552313	0.129043	0.0738113	0.976449	0.880041	0.958459	-0.494114	0.0625636	0.0103504	0.0554972	0.0184265
BBX__chr3	0.0350919	-0.306705	-0.341797	0.923476	0.0357581	0.0228076	0.338411	0.00402195	0.0345745	1.44663	1.64192
BCAM__chr19	-0.145502	-0.384929	-0.239427	0.960581	0.76301	0.897951	-1.01411	0.0599834	0.0174661	0.11747	0.0467473
BCAN__chr1	-1.19338	-1.389	-0.195625	0.156712	0.0996698	0.933734	0.564642	0.256483	0.804897	1.00144	0.029777
BCAP29__chr7	0.134989	-0.918875	-1.05386	0.900894	0.0551863	0.0323686	-0.432587	0.135651	0.0453261	1.25817	1.48988
BCAP31__chrX	0.639811	0.302151	-0.33766	0.0102591	0.169472	0.123679	-0.126613	0.322034	1.98889	0.770901	0.907702
BCAR1__chr16	0.788608	-0.290838	-1.07945	0.135335	0.693785	0.0469498	-0.936515	0.0161099	0.86859	0.158775	1.32837
BCAR3__chr1	-0.28768	-1.47749	-1.18981	0.12121	4.67e-05	0.000161662	-0.157362	0.164142	0.916461	4.33105	3.79139
BCAS1__chr20	0.311071	0.416122	0.10505	0.724346	0.574564	0.962106	-0.0251005	0.940578	0.140054	0.240661	0.0167769
BCAS2__chr1	0.189989	0.260232	0.0702431	0.288203	0.132382	0.815079	0.0126716	0.895555	0.540301	0.878171	0.0888005
BCAS3__chr17	0.192262	0.449912	0.25765	0.924943	0.667793	0.870522	-0.380772	0.393719	0.0338852	0.175358	0.06022
BCAS4__chr20	0.325452	0.567236	0.241784	0.475752	0.157789	0.648558	-0.139177	0.540563	0.322619	0.801924	0.188052
BCAT1__chr12	0.552113	-0.69779	-1.2499	0.00761289	0.00235427	9.54e-05	-0.460243	0.0028808	2.11845	2.62814	4.02063
BCAT2__chr19	0.0203394	-0.73733	-0.75767	0.99751	0.110446	0.101371	-0.55732	0.0648028	0.00108268	0.956849	0.994086
BCCIP__chr10	0.273944	-0.43914	-0.713083	0.403928	0.144921	0.0259959	-0.0167057	0.920799	0.393696	0.83887	1.5851
BCDIN3D-AS1__chr12	-0.300091	0.736717	1.03681	0.878377	0.493338	0.281988	-0.0654071	0.90012	0.056319	0.306856	0.549769
BCDIN3D__chr12	-0.168184	-0.138949	0.0292351	0.858534	0.900353	0.995283	0.073585	0.784802	0.0662423	0.0455873	0.00205324
BCHE__chr3	-0.811841	-0.4488	0.363041	0.0099409	0.105017	0.191915	0.564823	0.00877011	2.00257	0.978739	0.71689
BCKDHA__chr19	-0.504734	-0.572042	-0.0673075	0.620637	0.549007	0.990842	-0.180877	0.685312	0.207162	0.260422	0.00399554
BCKDHB__chr6	-0.380027	-0.598735	-0.218708	0.149531	0.0308676	0.461721	0.233345	0.148993	0.825267	1.5105	0.33562
BCKDK__chr16	0.172144	0.233929	0.0617846	0.541872	0.350903	0.917122	0.0102928	0.93775	0.266104	0.454813	0.0375729
BCL10__chr1	0.0393407	0.530634	0.491293	0.993445	0.366337	0.414724	0.328161	0.306952	0.00285605	0.43612	0.382241
BCL11A__chr2	-0.369277	1.64447	2.01374	0.0720578	4.23e-05	1.26e-05	1.26592	2.4e-05	1.14232	4.37417	4.89986
BCL11B__chr14	-0.0143806	2.30239	2.31677	0.998642	0.000516523	0.000499084	1.51048	0.000693107	0.000590092	3.28691	3.30183
BCL2L11__chr2	0.0388987	-0.66635	-0.705248	0.975337	0.024815	0.0194348	-0.322556	0.0734599	0.0108453	1.60529	1.71142
BCL2L12__chr19	0.0538136	-1.43587	-1.48968	0.956758	0.000668648	0.000546409	-0.795666	0.00212124	0.0191977	3.1748	3.26248
BCL2L13__chr22	0.0188756	-0.427382	-0.446258	0.99618	0.222341	0.200271	-0.405506	0.070787	0.00166219	0.652981	0.698382
BCL2L14__chr12	-0.289404	-0.415305	-0.125901	0.866324	0.749622	0.972675	0.240042	0.618604	0.0623196	0.125157	0.0120322
BCL2L15__chr1	-0.651999	-0.0272533	0.624746	0.470292	0.998498	0.496867	0.102269	0.818308	0.327632	0.000652859	0.30376
BCL2L1__chr20	0.276549	0.728179	0.45163	0.21834	0.00583542	0.0477594	-0.176208	0.188343	0.660867	2.23393	1.32094
BCL2L2__chr14	0.372387	-1.16357	-1.53596	0.891828	0.381802	0.219299	-0.775654	0.284883	0.0497191	0.418162	0.658964
BCL2__chr18	-0.616327	-0.350712	0.265614	0.256994	0.599351	0.737517	-0.11741	0.693931	0.590077	0.222319	0.132228
BCL3__chr19	0.384357	-1.25345	-1.63781	0.83793	0.225669	0.108763	-0.96042	0.128938	0.076792	0.646529	0.96352
BCL6__chr3	0.294219	0.475043	0.180824	0.875846	0.716247	0.950484	0.0755138	0.881219	0.0575721	0.144937	0.022055
BCL7A__chr12	-0.298332	0.402823	0.701155	0.0691476	0.0211848	0.00141718	0.409234	0.00326828	1.16022	1.67398	2.84858
BCL7B__chr7	-0.395341	0.0433056	0.438647	0.0839221	0.95482	0.0582497	0.163033	0.228601	1.07612	0.0200786	1.23471
BCL7C__chr16	0.243716	-0.326573	-0.570289	0.397975	0.224927	0.0386555	-0.175335	0.263064	0.400145	0.647959	1.41279
BCL9L__chr11	-0.276151	-0.62074	-0.344589	0.9321	0.712401	0.896944	-0.746151	0.279369	0.0305374	0.147275	0.0472348
BCL9__chr1	-0.171211	0.319356	0.490568	0.493011	0.140983	0.0314508	-0.246091	0.0782148	0.307143	0.850834	1.50237
BCLAF1__chr6	-0.219384	0.136099	0.355483	0.0026591	0.0254884	0.000192819	-0.132151	0.00499608	2.57527	1.59366	3.71485
BCORL1__chrX	-0.313191	-0.537311	-0.22412	0.602442	0.27375	0.763043	-0.697041	0.0341468	0.220085	0.562646	0.117451
BCOR__chrX	0.193337	0.365601	0.172264	0.492872	0.135426	0.562719	-0.20125	0.175422	0.307266	0.868296	0.249709
BCR__chr22	0.114573	1.1115	0.996926	0.911492	0.0165667	0.0265376	0.347911	0.175214	0.0402473	1.78076	1.57614
BCS1L__chr2	-0.0656544	-1.31069	-1.24503	0.996881	0.354123	0.386202	-1.04967	0.190813	0.00135683	0.450846	0.413186
BCYRN1__chrX	1.90179	0.965443	-0.936342	0.00989578	0.135598	0.14801	0.327528	0.380534	2.00455	0.867747	0.829708
BDH1__chr3	-0.381523	0.491871	0.873394	0.820406	0.724689	0.400707	0.163563	0.75979	0.0859712	0.139848	0.397173
BDH2__chr4	-0.42042	-1.41627	-0.995848	0.28548	0.00311745	0.0169325	-0.617025	0.0231722	0.544424	2.5062	1.77128
BDNF-AS__chr11	-0.211229	-0.227572	-0.0163432	0.878325	0.860653	0.999206	-0.0709793	0.846677	0.0563449	0.065172	0.000344878
BDNF__chr11	1.417	0.675527	-0.741473	0.263587	0.697392	0.651137	0.469433	0.50439	0.579075	0.156523	0.186328
BDP1__chr5	-0.00154077	-0.312296	-0.310755	0.999997	0.897492	0.89843	-0.550663	0.371615	1.16479e-06	0.0469696	0.0465157
BEAN1__chr16	0.217188	0.369159	0.151971	0.858313	0.656211	0.926996	-0.254356	0.473233	0.0663544	0.182956	0.0329221
BECN1__chr17	0.286065	-0.0341702	-0.320235	0.214917	0.971723	0.160973	0.10058	0.441286	0.66773	0.0124574	0.793246
BEGAIN__chr14	-0.528051	-0.361635	0.166416	0.5734	0.760298	0.941558	-0.194027	0.652002	0.241542	0.119016	0.026153
BEND2__chrX	-0.285521	1.0265	1.31202	0.811386	0.139746	0.063093	0.705511	0.106577	0.0907724	0.85466	1.20002
BEND3P3__chr10	-0.195224	-0.0782249	0.116999	0.818595	0.967463	0.929151	0.00549835	0.983815	0.0869308	0.0143656	0.0319138
BEND3__chr6	-0.0403956	-0.653143	-0.612747	0.997702	0.578649	0.6147	-0.203124	0.704485	0.00099906	0.237585	0.211337
BEND4__chr4	-0.0481547	2.14026	2.18842	0.953848	3.05e-05	2.67e-05	0.830807	0.000803815	0.0205208	4.51589	4.573
BEND5__chr1	-0.302602	1.06751	1.37012	0.39496	0.00606704	0.00170018	0.187366	0.326655	0.403446	2.21702	2.7695
BEND6__chr6	-0.112904	-0.59242	-0.479516	0.980258	0.603713	0.711575	-0.0548371	0.913472	0.0086598	0.219169	0.147779
BEND7__chr10	-0.518708	0.381853	0.900561	0.0209221	0.0699144	0.00141472	0.218022	0.0980769	1.67939	1.15543	2.84933
BEST4__chr1	-0.60047	-0.745025	-0.144555	0.023406	0.00882961	0.664682	0.24158	0.117774	1.63067	2.05406	0.177386
BET1L__chr11	0.702864	0.776211	0.0733473	0.0149667	0.00946415	0.905501	-0.259904	0.112645	1.82487	2.02392	0.043111
BET1__chr7	0.320309	-0.780363	-1.10067	0.538023	0.0765899	0.0199104	-0.821125	0.0126157	0.2692	1.11583	1.70092
BEX1__chrX	0.346992	0.701131	0.354139	0.039335	0.00141914	0.0362733	0.244049	0.0306613	1.40522	2.84797	1.44041
BEX2__chrX	0.102252	0.949179	0.846926	0.8348	0.00402402	0.0070667	-0.0644667	0.669313	0.0784173	2.39534	2.15078
BEX4__chrX	0.196482	0.630532	0.434051	0.068097	0.000250996	0.00192126	-0.0930475	0.153058	1.16687	3.60033	2.71641
BEX5__chrX	0.571408	1.86657	1.29516	0.399885	0.00912568	0.0443087	0.251797	0.479355	0.398065	2.03973	1.35351
BFAR__chr16	0.132966	-0.0886596	-0.221626	0.403694	0.645221	0.129298	-0.181525	0.0592848	0.393948	0.190291	0.888408
BFSP1__chr20	-1.27143	-1.64275	-0.371324	0.0954439	0.0377773	0.747218	0.168741	0.692613	1.02025	1.42277	0.126553
BGN__chrX	0.468257	-0.0360836	-0.50434	0.442086	0.99443	0.395273	-0.0865029	0.777459	0.354493	0.00242558	0.403103
BHLHB9__chrX	-0.482004	-0.0137423	0.468261	0.00996585	0.991061	0.0114068	0.366341	0.00587951	2.00149	0.00389961	1.94284
BHLHE22__chr8	-0.308553	-0.551477	-0.242924	0.7894	0.498141	0.861721	0.669729	0.125908	0.102703	0.302647	0.0646332
BHLHE40__chr3	0.731269	0.800206	0.0689378	0.258912	0.210561	0.984904	-0.125765	0.722948	0.586847	0.676621	0.0066063
BHLHE41__chr12	0.838461	-0.309291	-1.14775	0.0631243	0.56878	0.0178396	0.148939	0.553969	1.1998	0.245056	1.74861
BHMT2__chr5	0.201268	0.26119	0.0599225	0.915338	0.86289	0.992081	-0.152224	0.721348	0.0384185	0.0640445	0.00345296
BICD1__chr12	-0.032793	0.303836	0.336629	0.988218	0.416972	0.352729	0.184726	0.350352	0.00514708	0.379894	0.452559
BICD2__chr9	0.125826	-0.723267	-0.849093	0.956369	0.300667	0.211533	-0.637234	0.126921	0.0193745	0.521914	0.674622
BID__chr22	-0.197813	-0.586585	-0.388772	0.818202	0.241668	0.49214	0.0336128	0.90253	0.0871394	0.616781	0.307912
BIK__chr22	0.55001	1.27676	0.726755	0.720143	0.23493	0.576218	0.31543	0.597273	0.142581	0.629061	0.239413
BIN1__chr2	0.0646483	0.433854	0.369205	0.963818	0.266556	0.363277	-0.791271	0.00809595	0.016005	0.574212	0.439762
BIN3__chr8	0.15049	-0.397705	-0.548195	0.883587	0.462241	0.265305	-0.696376	0.0349217	0.0537506	0.335131	0.576255
BIRC2__chr11	0.19961	0.0318174	-0.167793	0.385717	0.971936	0.494768	0.143149	0.256103	0.413732	0.0123625	0.305598
BIRC3__chr11	1.05376	0.115386	-0.938376	0.0161939	0.899953	0.0267707	-0.729769	0.0141799	1.79065	0.0457803	1.57234
BIRC5__chr17	-0.358737	-1.68343	-1.32469	0.343982	0.000907045	0.00320663	-0.382917	0.0927273	0.463464	3.04237	2.49395
BIRC6__chr2	-0.261543	0.182372	0.443915	0.421758	0.6367	0.133351	0.0123713	0.940226	0.374937	0.196065	0.875005
BIVM__chr13	-0.680758	0.0956809	0.776439	0.00285126	0.710226	0.00143293	0.0621834	0.54224	2.54496	0.148603	2.84378
BLCAP__chr20	-0.117816	0.760909	0.878725	0.702951	0.00430421	0.00205789	-0.0872933	0.482718	0.153075	2.36611	2.68658
BLMH__chr17	0.105563	0.732484	0.62692	0.919779	0.0770356	0.126872	0.262108	0.277948	0.0363165	1.11331	0.896634
BLM__chr15	-0.533744	-1.20439	-0.670649	0.282785	0.0205376	0.164449	-0.408282	0.163998	0.548544	1.68745	0.78397
BLOC1S1-RDH5__chr12	-0.0598716	-0.0472786	0.0125931	0.916099	0.94653	0.996075	0.186762	0.175767	0.0380576	0.0238657	0.00170812
BLOC1S1__chr12	-0.134763	-0.185263	-0.0505002	0.445447	0.251809	0.879898	0.127349	0.183193	0.351204	0.598929	0.0555678
BLOC1S2__chr10	0.649305	0.608712	-0.0405924	0.00522693	0.00716814	0.945584	0.0622808	0.569508	2.28175	2.14459	0.0243
BLOC1S3__chr19	0.528379	0.703144	0.174764	0.0356196	0.0102334	0.544475	-0.0959476	0.484741	1.44831	1.98998	0.264022
BLOC1S4__chr4	0.31717	0.22802	-0.0891496	0.344625	0.549725	0.905047	0.0314467	0.859052	0.462653	0.259855	0.0433288
BLOC1S6__chr15	0.208057	-0.0573061	-0.265363	0.113679	0.791062	0.0492278	-0.185762	0.0384658	0.944319	0.10179	1.30779
BLVRA__chr7	0.0412253	-0.518996	-0.560221	0.94533	0.0160159	0.0113019	0.0951785	0.399204	0.0244168	1.79545	1.94685
BLVRB__chr19	1.06344	0.434092	-0.62935	0.03738	0.421572	0.203653	-0.0634548	0.817074	1.42736	0.375129	0.69111
BLZF1__chr1	0.747791	0.284244	-0.463547	0.47721	0.887674	0.735836	-0.634264	0.246629	0.32129	0.0517466	0.133219
BMF__chr15	-0.392218	-0.697156	-0.304938	0.475009	0.148917	0.623686	0.0394974	0.883463	0.323299	0.827056	0.205034
BMP1__chr8	0.0703503	0.389908	0.319558	0.951497	0.28994	0.412307	-0.0191261	0.923283	0.0215925	0.537691	0.38478
BMP2K__chr4	-0.146668	0.668955	0.815622	0.914353	0.23221	0.138943	-0.188904	0.545446	0.038886	0.634119	0.857163
BMP2__chr20	-0.106064	0.0645047	0.170569	0.977947	0.991766	0.944287	0.160691	0.721341	0.00968473	0.00359069	0.0248961
BMP3__chr4	0.0176715	-0.432385	-0.450057	0.997118	0.256901	0.234908	0.392607	0.0964746	0.00125326	0.590235	0.629102
BMP4__chr14	-0.876135	-0.617739	0.258395	0.0016647	0.00961963	0.222122	-1.54525	8.74e-06	2.77866	2.01684	0.653408
BMP7__chr20	-0.0341791	-0.9394	-0.905221	0.989923	0.0227605	0.026636	-0.353309	0.136711	0.00439858	1.64282	1.57453
BMP8A__chr1	0.573754	0.562214	-0.0115407	0.670474	0.680551	0.999827	-0.234591	0.674359	0.173618	0.167139	7.52786e-05
BMP8B__chr1	-0.222183	0.247748	0.469931	0.772703	0.728098	0.364186	0.1432	0.600889	0.111988	0.13781	0.438676
BMPR1A__chr10	-0.41676	-0.839941	-0.423181	0.0805458	0.00395369	0.0764422	-0.243283	0.103158	1.09396	2.403	1.11667
BMPR1B__chr4	0.267039	-0.923142	-1.19018	0.792708	0.133553	0.0577604	-0.0894791	0.7949	0.100887	0.874348	1.23837
BMPR2__chr2	0.234855	0.896045	0.66119	0.42504	0.00521729	0.0214612	0.257445	0.121542	0.37157	2.28255	1.66835
BMS1P4__chr10	-0.7954	-0.410766	0.384634	0.345571	0.723966	0.751944	0.889832	0.0817898	0.461463	0.140282	0.123815
BMS1__chr10	-0.251385	1.65e-06	0.251386	0.700457	1	0.700454	-0.122478	0.638525	0.154618	7.09335e-12	0.15462
BNC2__chr9	-0.213933	0.162285	0.376218	0.802152	0.879074	0.530371	-0.474149	0.130791	0.0957431	0.0559747	0.275421
BNIP1__chr5	0.540588	0.643122	0.102534	0.505396	0.396515	0.972855	0.261182	0.510918	0.296368	0.401741	0.011952
BNIP2__chr15	0.425305	0.0254086	-0.399896	0.11451	0.988659	0.137617	-0.0641016	0.672029	0.941156	0.00495333	0.861327
BNIP3L__chr8	-0.218676	0.281445	0.500121	0.160529	0.0733407	0.00644895	0.103011	0.262101	0.794445	1.13465	2.19051
BNIP3__chr10	0.52213	0.290886	-0.231244	0.104559	0.406637	0.548941	-0.194037	0.301894	0.980638	0.390793	0.260474
BOC__chr3	-0.544542	-0.25853	0.286012	0.409013	0.797221	0.75954	0.812249	0.0455488	0.388262	0.0984214	0.119449
BOD1L1__chr4	0.280694	0.7603	0.479606	0.684005	0.1279	0.369907	0.231921	0.418774	0.164941	0.893131	0.431908
BOD1__chr5	-0.433046	-0.371872	0.0611736	0.0709296	0.116909	0.919201	-0.169202	0.230642	1.14917	0.932154	0.0365895
BOK__chr2	1.10843	-0.185097	-1.29353	0.129714	0.92214	0.0793555	-0.786761	0.0911454	0.887014	0.0352032	1.10042
BOLA1__chr1	-0.356075	0.15434	0.510415	0.19392	0.67977	0.064657	0.33635	0.0603337	0.712378	0.167638	1.18938
BOLA3-AS1__chr2	0.140076	0.133508	-0.00656812	0.961121	0.964596	0.999912	-0.587229	0.216308	0.0172221	0.0156546	3.81236e-05
BOLA3__chr2	0.529566	-0.299797	-0.829363	0.00779769	0.08221	0.000771663	-0.27811	0.0229799	2.10803	1.08508	3.11257
BOP1__chr8	0.0318836	-0.0236026	-0.0554862	0.990885	0.994991	0.972734	0.116757	0.583996	0.00397687	0.00218089	0.0120059
BORA__chr13	-0.408718	-0.793745	-0.385027	0.378898	0.0693332	0.416478	-0.448563	0.100194	0.421477	1.15906	0.380408
BPGM__chr7	0.497327	0.304071	-0.193256	0.0342267	0.177291	0.438763	-0.175803	0.193638	1.46563	0.751314	0.35777
BPHL__chr6	-0.294666	0.240234	0.534899	0.64315	0.740325	0.284349	0.446011	0.13559	0.191688	0.130578	0.546148
BPNT1__chr1	0.448369	0.223152	-0.225217	0.31909	0.721114	0.716983	-0.446164	0.100467	0.496087	0.141996	0.144491
BPTF__chr17	-0.351131	0.419809	0.770939	0.057819	0.0287372	0.00156199	0.143783	0.189394	1.23793	1.54155	2.80632
BRAF__chr7	0.283963	0.85162	0.567657	0.896979	0.424208	0.662212	0.168967	0.755015	0.0472175	0.372421	0.179003
BRAP__chr12	-0.118654	-0.243456	-0.124802	0.939589	0.775856	0.933458	-0.07819	0.794162	0.0270621	0.110219	0.0299053
BRAT1__chr7	-0.437204	-0.749474	-0.312269	0.189207	0.0313215	0.381097	-0.068477	0.712371	0.723062	1.50416	0.418965
BRCA1__chr17	-0.725622	-1.95957	-1.23395	0.0141449	7.41e-05	0.000985443	-0.125591	0.412585	1.8494	4.13016	3.00637
BRCA2__chr13	-0.529998	0.250528	0.780526	0.68276	0.914207	0.461816	0.908897	0.120926	0.165732	0.0389554	0.335531
BRCC3__chrX	0.0604697	-0.677866	-0.738335	0.997192	0.716241	0.675747	-0.334747	0.645314	0.00122136	0.144941	0.170216
BRD1__chr22	0.230151	0.732086	0.501934	0.77431	0.146855	0.347799	0.199203	0.488271	0.111085	0.833113	0.458671
BRD2__chr6	-0.0776986	-0.274305	-0.196606	0.942836	0.516573	0.699175	-0.204272	0.331016	0.0255638	0.286868	0.155414
BRD3__chr9	0.110769	0.219663	0.108895	0.95513	0.838188	0.956591	-0.228213	0.492323	0.0199375	0.0766588	0.0192736
BRD4__chr19	-0.281286	0.0704652	0.351751	0.730025	0.979437	0.619884	0.12663	0.683564	0.136662	0.00902369	0.207689
BRD7P3__chr6	0.182681	1.53533	1.35265	0.962458	0.145656	0.203669	0.951265	0.142834	0.0166182	0.836671	0.691075
BRD7__chr16	-0.00393058	0.00677058	0.0107012	0.999727	0.999189	0.997976	0.00691851	0.963272	0.000118717	0.000352217	0.00087969
BRD8__chr5	-0.564734	-0.386377	0.178357	0.00191221	0.012509	0.200603	0.0924434	0.257841	2.71847	1.90278	0.697663
BRD9__chr5	0.121845	-0.0926845	-0.21453	0.92251	0.954142	0.784186	-0.276321	0.325866	0.0350291	0.0203868	0.105581
BRDT__chr1	-0.163665	-0.0618555	0.101809	0.872337	0.980292	0.9478	0.137607	0.622606	0.0593158	0.0086447	0.0232835
BRE-AS1__chr2	0.394262	-0.214879	-0.609142	0.386909	0.729447	0.148994	-0.450099	0.0931667	0.412391	0.137006	0.826832
BREA2__chr8	0.47098	0.625165	0.154185	0.517531	0.340582	0.924854	0.206204	0.557612	0.286064	0.467778	0.0339269
BRE__chr2	0.261535	-0.247481	-0.509017	0.619075	0.648627	0.220927	-0.475753	0.0734606	0.208257	0.188005	0.655752
BRF1__chr14	-0.203189	-0.0110235	0.192166	0.849108	0.999505	0.863528	-0.201824	0.526584	0.0710373	0.000215046	0.0637238
BRF2__chr8	0.133354	-0.66952	-0.802875	0.897939	0.142392	0.0806886	-0.154433	0.550342	0.0467533	0.846514	1.09319
BRI3BP__chr12	0.252252	-1.45501	-1.70726	0.720845	0.00904978	0.0041421	-0.561492	0.0739836	0.142158	2.04336	2.38278
BRI3__chr7	0.44915	0.527345	0.0781953	0.0141414	0.00664558	0.759711	-0.207946	0.0566896	1.84951	2.17747	0.119352
BRICD5__chr16	-0.378662	0.100162	0.478824	0.551721	0.955247	0.406285	-0.507532	0.122723	0.258281	0.0198843	0.391169
BRIP1__chr17	-0.620623	-1.36762	-0.747001	0.139996	0.00609099	0.0780829	-0.200406	0.407325	0.853883	2.21531	1.10744
BRIX1__chr5	0.239284	-0.645525	-0.884808	0.275551	0.00859184	0.0017576	-0.0172831	0.884493	0.559798	2.06591	2.75508
BRK1__chr3	0.195925	0.451314	0.25539	0.0880113	0.00228234	0.0330157	-0.0823925	0.226423	1.05546	2.64162	1.48128
BRMS1L__chr14	0.172394	-0.398782	-0.571176	0.699723	0.213376	0.0743443	-0.18561	0.315715	0.155074	0.670855	1.12875
BRMS1__chr11	0.610756	-0.0773133	-0.688069	0.0529913	0.92354	0.0332985	-0.080814	0.641802	1.2758	0.0345443	1.47758
BROX__chr1	-0.22357	-0.245839	-0.0222694	0.75059	0.709286	0.997015	0.10008	0.699231	0.124597	0.149178	0.00129841
BRPF1__chr3	-0.104234	-0.0944945	0.00973982	0.880456	0.900291	0.998865	0.0212382	0.907458	0.0552924	0.045617	0.000493384
BRPF3__chr6	-0.554978	-0.508228	0.0467495	0.155106	0.195617	0.981769	0.224509	0.323205	0.809371	0.708593	0.00799068
BRSK1__chr19	0.487959	1.31829	0.830329	0.343977	0.0145247	0.0898568	0.458507	0.129152	0.46347	1.83789	1.04645
BRSK2__chr11	-0.136385	0.855069	0.991454	0.826872	0.0223986	0.0115611	0.158685	0.427625	0.0825617	1.64978	1.937
BRWD1__chr21	0.0242886	0.667056	0.642767	0.992361	0.0404863	0.0467485	0.260974	0.17142	0.00333021	1.39269	1.33023
BRWD3__chrX	-0.564019	0.393639	0.957658	0.110185	0.279082	0.0142933	0.513058	0.0347152	0.957876	0.554268	1.84487
BSDC1__chr1	-0.357121	0.496428	0.853549	0.704258	0.525424	0.201731	0.331696	0.385831	0.152268	0.27949	0.695227
BSG__chr19	0.265198	-0.481586	-0.746784	0.0816633	0.00675834	0.000692984	-0.317368	0.00778671	1.08797	2.17016	3.15928
BSN-AS2__chr3	0.305995	1.16556	0.859562	0.651457	0.0302201	0.0933397	0.0689914	0.808958	0.186114	1.5197	1.02993
BSN__chr3	-0.228488	1.22014	1.44863	0.69886	0.010384	0.00452022	0.166653	0.485647	0.15561	1.98363	2.34484
BST1__chr4	0.714818	0.591927	-0.122891	0.217421	0.324506	0.943136	-0.0640327	0.841361	0.662698	0.488777	0.0254255
BTAF1__chr10	0.252048	-0.255949	-0.507997	0.836981	0.832491	0.514807	-0.225944	0.549843	0.0772842	0.0796206	0.288355
BTBD10__chr11	0.449554	0.718168	0.268613	0.00797962	0.00071093	0.0693803	0.064409	0.441589	2.09802	3.14817	1.15876
BTBD11__chr12	-0.125164	-0.230475	-0.105311	0.857919	0.61262	0.89645	0.489628	0.0429377	0.0665538	0.212809	0.047474
BTBD17__chr17	-0.878666	-0.37245	0.506216	0.159605	0.653622	0.475788	-0.738575	0.0688576	0.796953	0.184673	0.322587
BTBD1__chr15	0.544929	0.529079	-0.0158502	0.378279	0.396819	0.999025	0.0208168	0.948258	0.422187	0.401407	0.000423527
BTBD2__chr19	-0.443016	-0.207451	0.235565	0.164885	0.60649	0.53249	-0.0280779	0.874456	0.782819	0.217176	0.273689
BTBD3__chr20	0.0307515	0.298258	0.267506	0.99169	0.498456	0.564144	0.356993	0.130609	0.00362404	0.302373	0.24861
BTBD6__chr14	-0.233993	0.648372	0.882366	0.719829	0.149429	0.0546802	0.375839	0.169119	0.142771	0.825566	1.26217
BTBD7__chr14	0.0080351	0.120084	0.112049	0.999811	0.958987	0.964163	-0.26433	0.484035	8.2015e-05	0.0181873	0.0158495
BTBD9__chr6	-0.0269544	0.744621	0.771575	0.988392	0.0162913	0.0138785	0.17601	0.288225	0.00507098	1.78804	1.85766
BTD__chr3	-0.578475	-0.230431	0.348044	0.641905	0.927752	0.845064	0.0626831	0.905617	0.192529	0.0325681	0.0731105
BTF3L4__chr1	0.18303	0.764025	0.580994	0.437377	0.00366742	0.0137407	0.172852	0.178645	0.359144	2.43564	1.86199
BTF3__chr5	0.345958	-0.116	-0.461957	0.0130852	0.391306	0.003213	-0.208904	0.020481	1.88322	0.407483	2.49309
BTG1__chr12	-0.502731	0.430904	0.933635	0.0772866	0.126681	0.00559614	0.28531	0.10764	1.1119	0.897287	2.25211
BTG2__chr1	0.550472	-1.26432	-1.81479	0.774198	0.316008	0.132367	-0.392983	0.564839	0.111148	0.500303	0.87822
BTG3__chr21	0.242505	-0.881148	-1.12365	0.367119	0.00420397	0.00118736	-0.0266792	0.84932	0.435193	2.37634	2.92542
BTN2A1__chr6	0.287086	0.626137	0.339051	0.590271	0.143588	0.490791	0.277473	0.271159	0.228948	0.842881	0.309104
BTN2A2__chr6	-0.446701	0.0156415	0.462343	0.747104	0.999624	0.732526	-0.111355	0.827452	0.126619	0.00016326	0.135177
BTN2A3P__chr6	-0.0170332	0.245396	0.262429	0.998873	0.798363	0.77402	-0.0267469	0.933511	0.000489765	0.0977994	0.111248
BTN3A1__chr6	-0.961099	-0.307919	0.653181	0.458757	0.913717	0.679945	-0.586102	0.378574	0.338417	0.0391884	0.167526
BTN3A2__chr6	-0.184935	-0.978981	-0.794045	0.677372	0.00877135	0.0226442	-0.530931	0.0223131	0.169173	2.05693	1.64504
BTN3A3__chr6	-0.45701	-0.244102	0.212909	0.24479	0.622228	0.692298	-0.220415	0.326173	0.611206	0.20605	0.159707
BTRC__chr10	0.105283	0.780217	0.674934	0.723111	0.00267793	0.00556573	0.157314	0.19907	0.140795	2.5722	2.25448
BUB1B__chr15	-0.604376	-1.82072	-1.21634	0.00140931	2.39e-06	2.75e-05	-0.310215	0.00599413	2.85099	5.6212	4.56059
BUB1__chr2	-0.235552	-1.58551	-1.34996	0.558243	0.000834784	0.00197005	-0.286067	0.158739	0.253177	3.07843	2.70552
BUB3__chr10	-0.118974	-0.608466	-0.489492	0.525077	0.00267067	0.00790212	-0.100123	0.283242	0.279777	2.57338	2.10226
BUD13__chr11	-0.291566	-0.504815	-0.213249	0.714978	0.402942	0.831727	0.00140707	0.996367	0.145708	0.394757	0.080019
BUD31__chr7	0.669126	0.038756	-0.63037	0.190462	0.992563	0.22048	-0.467544	0.136157	0.720191	0.00324203	0.656631
BVES__chr6	0.623389	-0.868423	-1.49181	0.157812	0.0539311	0.00500434	-0.574423	0.050748	0.801861	1.26816	2.30065
BYSL__chr6	-0.00531062	-1.19149	-1.18618	0.999973	0.332203	0.334934	-0.336023	0.609915	1.15419e-05	0.478597	0.47504
BZRAP1-AS1__chr17	-0.347585	1.17839	1.52598	0.849949	0.227999	0.113376	-0.0734463	0.891337	0.0706073	0.642067	0.945478
BZRAP1__chr17	-0.817314	0.221481	1.0388	0.18035	0.847133	0.0887674	-0.191276	0.577621	0.743883	0.0720486	1.05175
BZW1__chr2	0.354853	-0.225678	-0.580531	0.0505449	0.206595	0.00584688	-0.0976815	0.342094	1.29632	0.684879	2.23308
BZW2__chr7	0.0441021	0.759627	0.715525	0.970123	0.0158225	0.0206028	0.126915	0.438903	0.0131733	1.80072	1.68607
C10orf107__chr10	0.0963784	-0.211393	-0.307772	0.949624	0.786096	0.613504	-0.397743	0.171061	0.0224482	0.104525	0.212182
C10orf10__chr10	0.0180288	0.0628805	0.0448517	0.990835	0.895772	0.945048	-0.345501	0.0229368	0.00399847	0.0478023	0.0245462
C10orf111__chr10	-0.545114	-0.927724	-0.38261	0.546467	0.224908	0.731053	-0.506359	0.256027	0.262436	0.647996	0.136051
C10orf114__chr10	0.0290857	-1.1403	-1.16939	0.99875	0.227911	0.214743	0.0134918	0.97929	0.000543056	0.642235	0.668082
C10orf118__chr10	-0.281758	0.578136	0.859894	0.869294	0.57744	0.332489	0.555271	0.264257	0.0608331	0.238493	0.478223
C10orf11__chr10	0.391325	0.575459	0.184135	0.722345	0.515356	0.927556	0.273342	0.524328	0.141255	0.287893	0.0326599
C10orf12__chr10	0.0249818	0.78046	0.755478	0.999024	0.438173	0.458649	1.04272	0.0749449	0.000424079	0.358355	0.338519
C10orf137__chr10	-0.368696	-1.01884	-0.650141	0.555147	0.0540628	0.214038	-0.0536767	0.852655	0.255592	1.2671	0.669509
C10orf25__chr10	0.938745	0.667055	-0.27169	0.551795	0.729591	0.946756	0.123825	0.865579	0.258222	0.13692	0.0237621
C10orf2__chr10	1.17722	0.0506315	-1.12659	0.250586	0.996736	0.275419	-0.378382	0.507258	0.601043	0.00141965	0.560006
C10orf32__chr10	-0.329476	-0.0666801	0.262795	0.348211	0.949755	0.490004	0.244668	0.216722	0.458158	0.0223886	0.309801
C10orf35__chr10	0.178189	1.64716	1.46897	0.736484	0.000979379	0.00180336	-0.225106	0.281442	0.132837	3.00905	2.74392
C10orf67__chr10	0.492331	0.434515	-0.0578162	0.7114	0.764464	0.995036	0.154842	0.765763	0.147886	0.116643	0.00216137
C10orf76__chr10	-0.0887814	-0.285644	-0.196863	0.863101	0.285647	0.516011	-0.068178	0.640053	0.0639382	0.544171	0.287341
C10orf88__chr10	-0.101325	0.250965	0.35229	0.838287	0.388602	0.193743	0.275046	0.104808	0.0766075	0.410495	0.712775
C11orf1__chr11	0.0635881	0.189838	0.12625	0.97356	0.794086	0.901021	0.0919068	0.709199	0.0116372	0.100133	0.045265
C11orf24__chr11	0.281234	0.0535758	-0.227658	0.315748	0.95046	0.447476	-0.232306	0.156533	0.500659	0.022066	0.34923
C11orf30__chr11	-0.645737	0.286324	0.932061	0.114411	0.565302	0.0304321	0.417721	0.104733	0.941532	0.247719	1.51667
C11orf31__chr11	0.107051	-0.510789	-0.617839	0.346977	0.000850869	0.000297963	-0.230971	0.00697176	0.4597	3.07014	3.52584
C11orf45__chr11	0.511644	0.175351	-0.336293	0.1317	0.723256	0.350525	-0.274132	0.181913	0.880413	0.140708	0.455281
C11orf48__chr11	0.12576	-0.53513	-0.66089	0.824255	0.0943619	0.0444746	-0.0663675	0.710625	0.0839382	1.0252	1.35189
C11orf49__chr11	0.00282258	0.185184	0.182361	0.999873	0.606829	0.615339	0.295757	0.0998377	5.49626e-05	0.216933	0.210885
C11orf54__chr11	-0.417096	-0.0446537	0.372442	0.0540301	0.945041	0.0808382	0.358466	0.0194777	1.26736	0.0245495	1.09238
C11orf57__chr11	0.0610739	0.712939	0.651865	0.892221	0.00415468	0.00647295	0.400519	0.0102214	0.0495274	2.38146	2.1889
C11orf58__chr11	0.119263	0.01702	-0.102243	0.45608	0.981884	0.550697	0.0576168	0.478168	0.340959	0.00793988	0.259087
C11orf63__chr11	0.0246976	-0.128725	-0.153422	0.997691	0.939737	0.91585	0.12717	0.697132	0.00100395	0.0269935	0.0381756
C11orf68__chr11	0.226646	0.315262	0.0886162	0.677863	0.491221	0.939042	-0.236405	0.309677	0.168858	0.308723	0.027315
C11orf70__chr11	0.239532	-0.939386	-1.17892	0.711085	0.0437936	0.0169933	-0.0179496	0.94316	0.148078	1.35859	1.76972
C11orf71__chr11	0.223288	0.158597	-0.0646909	0.58959	0.756964	0.952935	-0.337459	0.106605	0.22945	0.120925	0.0209366
C11orf73__chr11	0.051097	-0.0908981	-0.141995	0.940409	0.826828	0.64148	0.0384079	0.767807	0.0266831	0.082585	0.192817
C11orf74__chr11	-0.0199916	-0.076601	-0.0566094	0.996659	0.952425	0.973632	-0.392534	0.110071	0.00145319	0.0211692	0.0116054
C11orf75__chr11	0.272271	-1.3917	-1.66397	0.860552	0.0789415	0.040971	-1.12933	0.0362508	0.0652229	1.10269	1.38752
C11orf80__chr11	-0.0318396	0.40831	0.44015	0.992404	0.351699	0.305989	-0.106865	0.645721	0.00331143	0.453829	0.514294
C11orf82__chr11	-0.267345	-1.25048	-0.983131	0.730429	0.0255702	0.0653908	0.385014	0.220326	0.136422	1.59227	1.18448
C11orf83__chr11	0.0460229	-1.37955	-1.42557	0.994747	0.059252	0.052485	-0.674731	0.129644	0.00228746	1.2273	1.27996
C11orf84__chr11	-0.0423604	-0.136471	-0.0941102	0.96167	0.682338	0.828604	-0.336719	0.0406191	0.0169739	0.166001	0.0816528
C11orf87__chr11	-0.926774	-0.722324	0.20445	0.164272	0.294793	0.887875	-0.47103	0.233709	0.784436	0.530483	0.0516482
C11orf91__chr11	0.140287	-0.116703	-0.256991	0.695346	0.774	0.341338	-0.448425	0.0168295	0.157799	0.111259	0.466816
C11orf95__chr11	-0.133016	0.926156	1.05917	0.7436	0.00467637	0.00236067	0.287475	0.0936358	0.128661	2.33009	2.62696
C11orf96__chr11	0.455578	1.6208	1.16522	0.673992	0.0472566	0.142452	1.40745	0.0161639	0.171345	1.32554	0.846332
C12orf10__chr12	-0.209061	-0.0524534	0.156608	0.520578	0.955344	0.681106	-0.313511	0.0787741	0.283514	0.0198404	0.166785
C12orf23__chr12	-0.0469458	-0.219039	-0.172093	0.940252	0.328199	0.479094	-0.132541	0.289359	0.0267557	0.483862	0.319579
C12orf29__chr12	-0.422201	-0.961691	-0.539491	0.385598	0.0397774	0.239815	0.0671917	0.789915	0.413865	1.40036	0.620123
C12orf36__chr12	0.390789	-0.014688	-0.405477	0.249387	0.997496	0.229372	-0.445985	0.0459951	0.603125	0.00108902	0.639459
C12orf39__chr12	-0.277301	-0.729628	-0.452326	0.717787	0.170028	0.444475	-0.794368	0.031163	0.144004	0.769479	0.352152
C12orf43__chr12	0.138422	0.073083	-0.0653386	0.509747	0.815511	0.848627	-0.0598782	0.557357	0.292645	0.0885702	0.0712834
C12orf44__chr12	0.181728	0.408519	0.226792	0.392349	0.0436757	0.258799	-0.204705	0.098954	0.406327	1.35976	0.587038
C12orf45__chr12	0.823369	-0.394726	-1.2181	0.0064045	0.122779	0.000843071	-0.377051	0.0330531	2.19351	0.910875	3.07414
C12orf49__chr12	0.620857	-0.0418137	-0.66267	0.269356	0.992536	0.233253	-0.0387909	0.898892	0.569673	0.00325388	0.632172
C12orf4__chr12	-0.362266	-0.415396	-0.0531306	0.206124	0.143482	0.956344	0.102764	0.523854	0.685872	0.843202	0.0193858
C12orf50__chr12	0.0375175	1.28144	1.24392	0.997586	0.138334	0.150527	0.523914	0.30061	0.00104957	0.859071	0.822387
C12orf52__chr12	0.474237	0.411952	-0.0622858	0.0642396	0.103397	0.925789	-0.067856	0.633347	1.1922	0.985492	0.0334882
C12orf57__chr12	-0.262001	0.135946	0.397947	0.104003	0.450414	0.0215786	0.219004	0.0438219	0.982953	0.346388	1.66598
C12orf5__chr12	0.708387	-0.13734	-0.845727	0.00221781	0.508369	0.000863798	-0.0113678	0.909071	2.65408	0.293821	3.06359
C12orf60__chr12	0.0478871	0.424787	0.3769	0.993886	0.6395	0.69942	0.302302	0.445736	0.00266358	0.194159	0.155262
C12orf61__chr12	0.149561	0.112518	-0.0370431	0.953043	0.973051	0.997031	0.014606	0.972853	0.0208874	0.0118643	0.00129131
C12orf65__chr12	0.245458	0.469008	0.22355	0.673239	0.288683	0.717594	-0.100531	0.675516	0.171831	0.539579	0.144121
C12orf66__chr12	0.140379	-0.655822	-0.796201	0.947259	0.367414	0.251968	0.0715328	0.85066	0.0235315	0.434844	0.598654
C12orf68__chr12	-0.0699719	1.01493	1.0849	0.970455	0.0337744	0.0256374	0.346294	0.206158	0.0130248	1.47141	1.59113
C12orf73__chr12	0.445105	0.813315	0.36821	0.158178	0.017882	0.25267	0.151481	0.403317	0.800853	1.74758	0.597447
C12orf75__chr12	0.623679	-0.740155	-1.36383	0.179891	0.110292	0.0098092	-0.130748	0.616614	0.74499	0.957456	2.00837
C12orf76__chr12	-0.251997	0.119603	0.3716	0.780825	0.944036	0.598364	0.215916	0.499665	0.107446	0.0250115	0.223035
C12orf77__chr12	0.128014	1.19515	1.06714	0.95606	0.0816672	0.117594	0.691148	0.1069	0.0195149	1.08795	0.929614
C14orf101__chr14	0.265421	0.496829	0.231408	0.817224	0.520228	0.856686	0.106256	0.772938	0.0876589	0.283807	0.0671781
C14orf119__chr14	0.177452	-0.451498	-0.628951	0.0348002	0.000341246	5.18e-05	-0.192858	0.00418658	1.45842	3.46693	4.28593
C14orf132__chr14	-0.571047	0.646536	1.21758	0.0744374	0.0473572	0.00263747	0.244368	0.199719	1.12821	1.32461	2.57881
C14orf142__chr14	-0.0122102	-0.0449586	-0.0327484	0.999629	0.99498	0.997332	0.0771976	0.847339	0.000161325	0.00218543	0.00116003
C14orf159__chr14	-0.62168	0.0857969	0.707477	0.0707348	0.922572	0.0438931	-0.0461904	0.808089	1.15037	0.0349995	1.3576
C14orf166__chr14	0.359641	0.043307	-0.316334	0.0203412	0.891565	0.0348329	-0.0571293	0.484706	1.69162	0.0498469	1.45801
C14orf169__chr14	-0.272358	-0.88152	-0.609161	0.309415	0.00468155	0.0258733	0.0253496	0.859789	0.509458	2.32961	1.58715
C14orf178__chr14	-0.31649	0.127981	0.44447	0.828211	0.968829	0.697132	0.671001	0.173742	0.081859	0.0137527	0.156685
C14orf182__chr14	0.108833	0.389056	0.280223	0.959847	0.615791	0.769875	0.0730978	0.829398	0.0177982	0.210567	0.11358
C14orf1__chr14	0.316747	0.138902	-0.177845	0.0676477	0.475563	0.321165	-0.0878842	0.374118	1.16975	0.322792	0.493271
C14orf23__chr14	-0.61221	-1.09898	-0.486775	0.00486776	0.000212054	0.0144974	-0.559491	0.00113716	2.31267	3.67355	1.83871
C14orf28__chr14	0.0250542	0.167778	0.142724	0.997963	0.913859	0.936635	-0.213828	0.548351	0.000885682	0.0391207	0.0284297
C14orf2__chr14	0.149383	0.00572309	-0.14366	0.273694	0.997613	0.296456	-0.0122402	0.868714	0.562735	0.00103802	0.52804
C14orf37__chr14	-0.257909	-0.12575	0.132159	0.909168	0.977339	0.97501	-0.00776792	0.988169	0.041356	0.0099547	0.0109908
C14orf79__chr14	-0.282717	-0.383482	-0.100765	0.683319	0.51359	0.950072	-0.203939	0.476689	0.165377	0.289384	0.0222434
C14orf80__chr14	-0.288605	-0.39213	-0.103525	0.68531	0.515058	0.949847	0.23713	0.422399	0.164113	0.288143	0.0223463
C14orf93__chr14	0.558146	0.959792	0.401646	0.437479	0.138027	0.633185	-0.254741	0.489602	0.359043	0.860036	0.198469
C15orf27__chr15	-0.260383	1.06116	1.32154	0.871166	0.178238	0.0935137	0.0242695	0.955801	0.0598989	0.749	1.02912
C15orf32__chr15	-0.294314	-0.0199916	0.274322	0.837183	0.999155	0.856417	-0.495702	0.279276	0.0771798	0.000367132	0.0673149
C15orf37__chr15	0.330122	-0.577038	-0.90716	0.742919	0.437314	0.176611	-0.151229	0.687295	0.129059	0.359207	0.752983
C15orf38__chr15	0.272914	-0.5492	-0.822114	0.93468	0.767673	0.569855	-0.482374	0.474859	0.0293368	0.114824	0.244236
C15orf39__chr15	-0.92562	-1.50401	-0.578391	0.0110274	0.00094049	0.0753649	-0.753082	0.00472862	1.95753	3.02665	1.12283
C15orf40__chr15	-0.0762657	-0.692178	-0.615912	0.950631	0.0732021	0.107695	-0.0649011	0.761827	0.0219882	1.13548	0.967805
C15orf41__chr15	-0.305939	-0.762074	-0.456135	0.877107	0.480775	0.752869	-0.304296	0.569939	0.0569474	0.318058	0.123281
C15orf52__chr15	0.393465	0.917938	0.524473	0.549241	0.0942935	0.370561	0.585243	0.0923246	0.260237	1.02552	0.43114
C15orf57__chr15	-0.413296	0.0554552	0.468751	0.542228	0.987842	0.464794	0.153156	0.631986	0.265818	0.00531249	0.33274
C15orf61__chr15	-0.084506	0.0841797	0.168686	0.854331	0.855341	0.558519	-0.202105	0.163694	0.0683736	0.0678605	0.252962
C16orf13__chr16	0.0135947	-0.499173	-0.512768	0.996587	0.0621931	0.0563841	-0.0406829	0.782524	0.00148478	1.20626	1.24884
C16orf45__chr16	-0.210557	0.790668	1.00122	0.57464	0.0176998	0.0058664	0.371947	0.0631674	0.240605	1.75203	2.23163
C16orf46__chr16	0.368977	-0.347564	-0.716542	0.818895	0.83698	0.500898	-0.494922	0.353185	0.086772	0.0772847	0.300251
C16orf52__chr16	-0.384199	0.312013	0.696212	0.579602	0.690124	0.221587	0.0946578	0.763651	0.23687	0.161073	0.654456
C16orf55__chr16	-0.393966	-0.751173	-0.357207	0.285943	0.0420966	0.344847	-0.523414	0.0338044	0.54372	1.37575	0.462373
C16orf58__chr16	-0.00753356	-0.0843371	-0.0768036	0.998387	0.822332	0.849473	-0.0652633	0.58674	0.000700926	0.0849525	0.0708504
C16orf59__chr16	-0.0260014	-0.643955	-0.617953	0.967476	0.00217704	0.00269586	-0.124631	0.199467	0.0143596	2.66213	2.5693
C16orf62__chr16	-0.227742	-0.305273	-0.0775314	0.554454	0.372551	0.927958	-0.147044	0.422346	0.256134	0.428814	0.0324719
C16orf70__chr16	-0.000308008	-0.836604	-0.836296	1	0.214327	0.214516	0.261837	0.490277	1.19202e-07	0.668924	0.66854
C16orf71__chr16	0.137864	0.851809	0.713945	0.931188	0.143062	0.2261	0.273293	0.413501	0.0309628	0.844477	0.645699
C16orf72__chr16	-0.0267531	-0.241915	-0.215162	0.98228	0.304483	0.376344	0.0477388	0.707086	0.00776483	0.516437	0.424415
C16orf74__chr16	-0.543315	-0.39286	0.150455	0.118653	0.272544	0.79411	-0.0256272	0.895052	0.92572	0.564563	0.10012
C16orf80__chr16	0.137062	-0.0329873	-0.170049	0.0936689	0.816056	0.0433126	0.0237805	0.60502	1.0284	0.0882802	1.36339
C16orf86__chr16	-0.242024	-0.795443	-0.553419	0.795801	0.158006	0.354995	-0.728329	0.0518986	0.0991956	0.801325	0.449778
C16orf87__chr16	0.145228	-0.0736817	-0.21891	0.971224	0.992485	0.936203	-0.123765	0.817728	0.0126805	0.00327621	0.02863
C16orf88__chr16	-0.208247	-0.84067	-0.632422	0.728611	0.0455576	0.121223	-0.3875	0.126255	0.137504	1.34144	0.916414
C16orf91__chr16	-0.0252719	-0.431121	-0.405849	0.988291	0.102613	0.123672	0.00722174	0.960824	0.00511503	0.9888	0.90773
C16orf93__chr16	-0.16839	-0.0891824	0.0792072	0.883265	0.965263	0.972462	0.641495	0.0665589	0.0539088	0.0153544	0.0121271
C16orf95__chr16	-0.197976	-0.0194937	0.178482	0.842742	0.998293	0.86952	0.105397	0.725066	0.0743053	0.000741769	0.0607203
C17orf100__chr17	-0.169858	0.744192	0.91405	0.645156	0.0157024	0.00597215	-0.0361594	0.817239	0.190335	1.80404	2.22387
C17orf103__chr17	-0.0224992	0.328898	0.351397	0.999043	0.820558	0.798754	0.152918	0.740498	0.000415815	0.0858905	0.097587
C17orf50__chr17	0.40185	0.604158	0.202308	0.704317	0.477172	0.911283	-0.170881	0.683547	0.152232	0.321325	0.0403468
C17orf51__chr17	0.286847	-0.242949	-0.529796	0.896921	0.92455	0.700785	-0.263295	0.632182	0.047246	0.0340697	0.154415
C17orf53__chr17	-0.42116	-0.544902	-0.123742	0.377701	0.226394	0.906615	-0.346723	0.19475	0.422851	0.645135	0.042577
C17orf58__chr17	0.0929846	0.177467	0.0844828	0.690688	0.310496	0.73435	-0.225065	0.0460408	0.160718	0.507943	0.134097
C17orf59__chr17	0.38346	0.830017	0.446557	0.435302	0.0648265	0.339907	-0.0493623	0.841922	0.361209	1.18825	0.46864
C17orf62__chr17	0.0915508	0.196479	0.104928	0.974781	0.890627	0.967048	0.0840181	0.8165	0.0110931	0.0503042	0.0145519
C17orf67__chr17	0.154998	-1.32876	-1.48376	0.938205	0.0591884	0.0389013	-0.884805	0.0539394	0.0277024	1.22776	1.41004
C17orf70__chr17	0.422186	0.192014	-0.230173	0.756564	0.941827	0.917833	-0.615222	0.241142	0.121154	0.0260288	0.0372362
C17orf72__chr17	-0.00637385	-0.131144	-0.12477	0.999557	0.833765	0.84786	-0.255649	0.213141	0.000192431	0.0789563	0.0716756
C17orf74__chr17	0.479417	0.1744	-0.305017	0.180112	0.746209	0.441919	0.00765771	0.969245	0.744456	0.127139	0.354658
C17orf75__chr17	-0.171452	-0.0254556	0.145996	0.503396	0.98314	0.598621	0.369752	0.0203565	0.29809	0.00738459	0.222848
C17orf76-AS1__chr17	0.167342	0.249049	0.081707	0.372974	0.155435	0.765712	-0.0889413	0.379112	0.428322	0.808452	0.115934
C17orf77__chr17	0.0694745	0.883279	0.813804	0.990911	0.302104	0.351892	0.366263	0.437486	0.00396542	0.519843	0.453591
C17orf80__chr17	-0.271258	0.0800672	0.351325	0.363451	0.901704	0.213948	0.151365	0.35059	0.439554	0.0449361	0.669693
C17orf82__chr17	-0.117731	-0.241118	-0.123387	0.875317	0.593336	0.864201	-0.00376748	0.985087	0.0578344	0.226699	0.0633852
C17orf85__chr17	-0.556353	-0.119157	0.437196	0.0216156	0.712091	0.0567929	0.146654	0.268866	1.66523	0.147464	1.24571
C17orf89__chr17	0.40267	-0.55371	-0.95638	0.22383	0.0913093	0.0100731	0.0118298	0.948218	0.650082	1.03948	1.99684
C17orf96__chr17	-0.818023	-0.481011	0.337012	0.106904	0.377122	0.595084	0.131799	0.644092	0.971006	0.423518	0.225422
C17orf97__chr17	-0.297632	-0.155177	0.142455	0.224432	0.614716	0.660182	0.0495657	0.714661	0.648915	0.211326	0.180336
C17orf98__chr17	0.59967	-0.263605	-0.863275	0.0531116	0.43227	0.0114714	-0.399967	0.0486927	1.27481	0.364245	1.94038
C18orf21__chr18	-0.0605107	-0.724257	-0.663747	0.940311	0.0163652	0.0239475	-0.2553	0.133316	0.0267287	1.78608	1.62074
C18orf25__chr18	0.644622	0.470836	-0.173786	0.0747308	0.191582	0.750141	0.207358	0.320887	1.1265	0.717645	0.124857
C18orf32__chr18	-0.0168993	-0.13382	-0.11692	0.998394	0.905627	0.92684	0.0877397	0.743	0.000698182	0.0430505	0.0329953
C18orf54__chr18	-0.693111	-1.1	-0.406885	0.0329041	0.00394273	0.191998	0.171673	0.340346	1.48275	2.4042	0.716704
C18orf56__chr18	-0.409155	-1.14328	-0.734122	0.368361	0.0148979	0.0858667	-0.00784741	0.973589	0.433726	1.82688	1.06618
C18orf8__chr18	0.131825	0.0263792	-0.105446	0.710877	0.985644	0.800207	-0.549318	0.00610916	0.148206	0.00628001	0.0967978
C19orf10__chr19	0.849249	-0.134496	-0.983744	0.0149019	0.799178	0.00750231	-0.100573	0.573337	1.82676	0.0973564	2.1248
C19orf12__chr19	-0.18309	0.561675	0.744764	0.699784	0.0962726	0.0344182	0.0256667	0.891356	0.155036	1.0165	1.46321
C19orf18__chr19	-0.126101	-0.0182935	0.107807	0.96302	0.999202	0.972788	-0.0330109	0.93572	0.0163645	0.000346591	0.0119816
C19orf21__chr19	0.354167	0.672286	0.318119	0.753385	0.401268	0.794086	-0.12106	0.768885	0.122983	0.396566	0.100133
C19orf24__chr19	0.521118	-0.526354	-1.04747	0.0464586	0.0447065	0.00182957	-0.615695	0.00399021	1.33293	1.34963	2.73765
C19orf25__chr19	-0.15149	0.41489	0.566379	0.75792	0.195662	0.0776875	-0.0692534	0.698401	0.120377	0.708493	1.10965
C19orf26__chr19	0.0310916	-0.237496	-0.268587	0.996334	0.81308	0.769412	-0.381176	0.26615	0.00159517	0.0898667	0.113841
C19orf40__chr19	-0.506461	-0.542499	-0.0360379	0.235978	0.200335	0.990616	0.0984014	0.67693	0.627129	0.698244	0.00409488
C19orf43__chr19	0.173844	0.449254	0.27541	0.36532	0.0206076	0.125371	-0.0467547	0.644006	0.437327	1.68597	0.901803
C19orf44__chr19	-0.928465	-0.791641	0.136824	0.180965	0.263971	0.951303	-0.0772639	0.841356	0.742406	0.578443	0.021681
C19orf45__chr19	0.307948	0.282323	-0.025625	0.436864	0.491294	0.993402	-0.146862	0.470737	0.359654	0.308659	0.00287511
C19orf47__chr19	-0.258538	-0.188274	0.0702635	0.269101	0.464058	0.88712	-0.0323429	0.799517	0.570085	0.333428	0.0520175
C19orf48__chr19	-0.0824562	-0.7578	-0.675344	0.94766	0.0629116	0.0934499	-0.0135545	0.951691	0.0233474	1.20127	1.02942
C19orf52__chr19	-0.0144461	-0.361614	-0.347167	0.999039	0.578127	0.601359	-0.162043	0.586935	0.000417671	0.237977	0.220866
C19orf53__chr19	0.120089	-0.183529	-0.303618	0.567432	0.305699	0.079941	-0.0695681	0.478493	0.246086	0.514706	1.09723
C19orf54__chr19	-0.27889	-0.532275	-0.253385	0.76047	0.408953	0.796253	-0.358571	0.299176	0.118918	0.388326	0.0989488
C19orf55__chr19	0.265286	-0.278663	-0.543948	0.126767	0.10911	0.00733076	-0.118424	0.249782	0.896995	0.962134	2.13485
C19orf57__chr19	0.505734	1.08535	0.579611	0.450363	0.0727029	0.364593	-0.348113	0.318663	0.346437	1.13845	0.438192
C19orf60__chr19	0.0927813	0.0967989	0.0040176	0.476871	0.450291	0.998422	-0.0948821	0.172486	0.321599	0.346507	0.000686024
C19orf66__chr19	0.33414	1.9746	1.64046	0.271004	0.00012708	0.000361235	0.0374959	0.820276	0.567024	3.89592	3.44221
C19orf6__chr19	0.296739	0.335513	0.0387736	0.407973	0.331462	0.982304	-0.0727921	0.69298	0.389368	0.479567	0.00775429
C19orf70__chr19	0.511818	0.067578	-0.44424	0.147195	0.954372	0.213124	-0.3904	0.0841722	0.832107	0.0202824	0.671367
C19orf73__chr19	-0.540333	-0.538487	0.00184594	0.660123	0.661869	0.999995	-0.199722	0.697909	0.180375	0.179228	2.26229e-06
C19orf77__chr19	-0.21896	0.527421	0.746382	0.911785	0.607007	0.395808	0.4521	0.337038	0.0401077	0.216806	0.402515
C19orf81__chr19	-0.362062	-0.715286	-0.353224	0.352266	0.0558578	0.367625	-0.407545	0.0829023	0.45313	1.25292	0.434595
C1D__chr2	0.181248	-0.11763	-0.298878	0.757602	0.886782	0.496175	-0.136449	0.527708	0.120559	0.052183	0.304365
C1GALT1C1__chrX	0.0873384	-0.750366	-0.837704	0.950125	0.0866673	0.0589907	-0.381572	0.152708	0.0222195	1.06214	1.22922
C1GALT1__chr7	0.427037	0.0291163	-0.397921	0.184798	0.98947	0.220032	-0.154389	0.402447	0.733302	0.0045975	0.657514
C1QBP__chr17	0.296228	-0.816585	-1.11281	0.732615	0.164208	0.0616756	-0.399906	0.249144	0.135124	0.784605	1.20989
C1QL1__chr17	1.13495	1.08186	-0.0530896	0.222925	0.24873	0.995726	0.226043	0.661845	0.65184	0.604272	0.00186026
C1QL2__chr2	-0.892291	-1.02797	-0.135677	0.092398	0.0564351	0.919865	0.393968	0.212691	1.03434	1.24845	0.036276
C1QTNF1__chr17	-1.06691	-0.87195	0.194959	0.32915	0.455377	0.956215	0.136846	0.813934	0.482606	0.341629	0.0194445
C1QTNF2__chr5	-0.414459	-0.128287	0.286172	0.795149	0.977498	0.894463	0.608032	0.282032	0.0995516	0.00988404	0.0484377
C1QTNF3__chr5	-0.759381	-0.906768	-0.147387	0.555548	0.446501	0.975872	-0.337454	0.575813	0.255278	0.350177	0.0106071
C1QTNF6__chr22	-0.163583	0.451358	0.61494	0.663264	0.106417	0.0350146	0.179454	0.274845	0.178313	0.972987	1.45575
C1QTNF9B-AS1__chr13	0.4177	-0.0836886	-0.501388	0.442433	0.963187	0.3283	-0.343605	0.236273	0.354153	0.0162895	0.48373
C1RL-AS1__chr12	0.225714	0.50871	0.282996	0.863892	0.507993	0.797074	-0.0476526	0.897111	0.0635404	0.294142	0.0985015
C1RL__chr12	-0.424414	0.582203	1.00662	0.7643	0.614518	0.281803	0.586026	0.272302	0.116736	0.211465	0.550054
C1R__chr12	-0.10019	-0.126158	-0.0259677	0.988577	0.98197	0.999227	0.327292	0.584221	0.00498937	0.00790176	0.000335786
C1S__chr12	-0.350299	-1.11886	-0.768558	0.86193	0.287156	0.519609	-0.704521	0.242851	0.064528	0.541881	0.284323
C1orf106__chr1	-0.642964	-1.51397	-0.87101	0.246351	0.0127337	0.109536	-0.0317378	0.916681	0.608446	1.89504	0.960443
C1orf109__chr1	-0.0032714	-1.21505	-1.21178	0.999986	0.229156	0.230592	-0.584646	0.314367	6.02367e-06	0.639868	0.637156
C1orf112__chr1	-0.173716	-1.26402	-1.0903	0.909675	0.0517853	0.0874062	-0.58942	0.133234	0.0411139	1.28579	1.05846
C1orf114__chr1	-0.151553	-0.475103	-0.32355	0.918499	0.474979	0.69152	0.0831635	0.799256	0.0369211	0.323326	0.160195
C1orf115__chr1	-0.114819	-0.241318	-0.126499	0.949041	0.799099	0.938602	-0.308935	0.347277	0.0227149	0.0973993	0.0275186
C1orf122__chr1	0.373145	0.0681924	-0.304952	0.00721965	0.673651	0.0183631	0.107958	0.140348	2.14148	0.171565	1.73605
C1orf123__chr1	0.0371674	-0.228797	-0.265965	0.98616	0.614755	0.527329	-0.150933	0.458676	0.00605275	0.211298	0.277918
C1orf131__chr1	-0.0826178	-0.451142	-0.368524	0.990268	0.757016	0.828065	-0.265766	0.61831	0.00424707	0.120895	0.0819355
C1orf140__chr1	0.278763	0.717493	0.43873	0.908437	0.557512	0.79269	0.0578052	0.918374	0.0417053	0.253745	0.100897
C1orf145__chr1	-0.47237	0.772847	1.24522	0.724957	0.452698	0.176542	0.135561	0.791785	0.139688	0.344191	0.753152
C1orf159__chr1	-0.297036	0.184737	0.481772	0.726054	0.879834	0.459729	0.664475	0.075488	0.139031	0.0555991	0.337498
C1orf162__chr1	0.804152	-0.360723	-1.16487	0.515053	0.864036	0.285701	-0.409573	0.495728	0.288148	0.0634683	0.544088
C1orf174__chr1	-0.0507478	-0.27438	-0.223632	0.982626	0.622903	0.724092	0.114378	0.639596	0.00761157	0.20558	0.140206
C1orf186__chr1	0.150755	-0.274729	-0.425484	0.790331	0.487714	0.223862	-0.00205443	0.991483	0.102191	0.311835	0.650019
C1orf192__chr1	0.189356	-0.244973	-0.43433	0.871274	0.796844	0.516041	0.396263	0.242384	0.0598454	0.0986268	0.287316
C1orf194__chr1	-0.676208	-0.775276	-0.0990679	0.674979	0.602588	0.991023	-0.25558	0.699941	0.17071	0.219979	0.00391617
C1orf198__chr1	-0.0817592	-0.682703	-0.600944	0.808765	0.00450036	0.00839576	-0.15088	0.203135	0.0921774	2.34675	2.07594
C1orf213__chr1	0.0379346	-0.933908	-0.971843	0.992499	0.0632407	0.0546769	0.0221968	0.935939	0.00327008	1.199	1.2622
C1orf216__chr1	-0.588458	-0.349102	0.239356	0.650851	0.853468	0.927225	0.154977	0.777586	0.186519	0.068813	0.0328147
C1orf21__chr1	-0.270841	-0.564235	-0.293394	0.417014	0.0670089	0.366759	-0.687048	0.00553385	0.37985	1.17387	0.43562
C1orf220__chr1	0.624199	-0.0370766	-0.661276	0.0563531	0.98302	0.0453397	-0.322534	0.109078	1.24908	0.00743749	1.34352
C1orf226__chr1	-0.299384	-0.187675	0.111709	0.797291	0.912899	0.967912	0.256109	0.519005	0.0983831	0.0395772	0.014164
C1orf228__chr1	0.20078	0.964307	0.763526	0.923972	0.238346	0.376575	0.21132	0.640529	0.0343411	0.622792	0.424148
C1orf229__chr1	0.130636	-0.0472394	-0.177876	0.900491	0.986174	0.825772	-0.240218	0.360015	0.0455205	0.00604627	0.08314
C1orf233__chr1	-0.0560584	0.358906	0.414964	0.992608	0.748524	0.683123	-0.529294	0.228042	0.00322233	0.125794	0.165501
C1orf27__chr1	0.130478	-0.311317	-0.441794	0.868516	0.484515	0.269015	-0.306403	0.191414	0.0612223	0.314693	0.570223
C1orf35__chr1	-0.565499	-0.140886	0.424614	0.206567	0.880935	0.371813	0.0311804	0.899751	0.684939	0.0550561	0.429676
C1orf43__chr1	0.270721	0.199002	-0.0717185	0.00566028	0.0234204	0.428718	-0.016099	0.726247	2.24716	1.63041	0.367829
C1orf50__chr1	0.57397	0.778259	0.204289	0.0449476	0.0123446	0.535941	0.0227962	0.883056	1.34729	1.90852	0.270883
C1orf51__chr1	1.10396	-0.60908	-1.71304	0.282815	0.640952	0.0870181	-0.872238	0.152678	0.548498	0.193174	1.06039
C1orf52__chr1	0.142877	0.303643	0.160766	0.895129	0.624964	0.869731	-0.0286664	0.915078	0.0481142	0.204145	0.0606148
C1orf53__chr1	-0.0074042	0.220189	0.227593	0.99975	0.807743	0.796477	0.0735583	0.804034	0.000108781	0.0927265	0.0988266
C1orf54__chr1	0.465674	-0.715832	-1.18151	0.742569	0.516844	0.215318	-0.550286	0.317095	0.129263	0.28664	0.666919
C1orf56__chr1	-0.530469	-0.847868	-0.317399	0.806421	0.593887	0.924168	-0.305311	0.669469	0.0934382	0.226296	0.0342489
C1orf61__chr1	-1.53834	-1.38412	0.154221	0.000983034	0.00172749	0.7678	2.29309	1.32e-05	3.00743	2.76258	0.114752
C1orf63__chr1	-0.361783	-0.227685	0.134098	0.205064	0.480938	0.759478	0.254232	0.144017	0.68811	0.317911	0.119485
C1orf74__chr1	0.667958	0.0521196	-0.615839	0.310191	0.991292	0.359872	-0.41847	0.26145	0.50837	0.00379839	0.443852
C1orf85__chr1	-0.0555739	-1.05659	-1.00102	0.995377	0.265569	0.296888	-0.31748	0.544815	0.0020122	0.575822	0.527408
C1orf86__chr1	0.519506	0.165342	-0.354164	0.0995101	0.715554	0.274024	-0.185341	0.313053	1.00213	0.145357	0.562212
C20orf111__chr20	-0.0313572	-0.414963	-0.383606	0.99575	0.514381	0.561589	-0.701879	0.0525452	0.00184975	0.288715	0.250581
C20orf112__chr20	0.0401005	1.09348	1.05338	0.951927	0.000439122	0.000539757	-0.200036	0.116332	0.0213962	3.35741	3.2678
C20orf166-AS1__chr20	-0.0989101	0.0770928	0.176003	0.932914	0.958502	0.806995	-0.39332	0.132728	0.0301586	0.0184069	0.0931294
C20orf194__chr20	-0.422771	0.514108	0.936879	0.660374	0.551801	0.194688	0.497756	0.242342	0.18021	0.258217	0.71066
C20orf195__chr20	0.0784186	0.311704	0.233286	0.996536	0.947102	0.969895	-0.81345	0.352269	0.00150703	0.0236031	0.0132751
C20orf196__chr20	0.888139	0.730969	-0.157171	0.0919515	0.164653	0.893239	-0.222911	0.457586	1.03644	0.783432	0.0490324
C20orf201__chr20	-0.25507	0.741477	0.996547	0.88073	0.393883	0.219944	0.93301	0.0726766	0.0551574	0.404633	0.657688
C20orf203__chr20	0.0523471	0.0957508	0.0434038	0.971973	0.910243	0.980617	-0.456278	0.0511622	0.0123459	0.0408427	0.00850066
C20orf27__chr20	0.251494	-0.452333	-0.703826	0.817863	0.545543	0.273478	-0.0831675	0.811766	0.0873193	0.263171	0.563077
C20orf96__chr20	-0.41337	-1.62556	-1.21219	0.627939	0.0219126	0.0693799	0.101796	0.782677	0.202083	1.65931	1.15877
C21orf119__chr21	0.35102	0.0676171	-0.283403	0.659451	0.983578	0.757282	-0.182917	0.586198	0.180818	0.00719106	0.120742
C21orf2__chr21	0.00966341	0.363568	0.353905	0.99963	0.617635	0.632257	-0.0153355	0.961471	0.000160725	0.209268	0.199107
C21orf33__chr21	-0.129837	-0.446811	-0.316974	0.845183	0.211103	0.413121	0.128058	0.523662	0.0730493	0.675505	0.383922
C21orf49__chr21	-0.196136	0.709588	0.905724	0.865995	0.226804	0.117691	0.034764	0.914266	0.0624846	0.64435	0.929257
C21orf58__chr21	-0.744812	-0.837657	-0.0928441	0.00332119	0.0018069	0.773101	0.0100224	0.929421	2.47871	2.74306	0.111764
C21orf59__chr21	0.237945	-0.0994075	-0.337353	0.0832608	0.542146	0.0216552	0.224672	0.0217592	1.07956	0.265884	1.66444
C21orf62__chr21	-0.7254	-0.97003	-0.244629	0.117278	0.0426815	0.713102	-0.0825378	0.750304	0.930783	1.36976	0.146849
C21orf67__chr21	-0.289599	-0.683131	-0.393532	0.73831	0.24888	0.584069	-0.397286	0.247971	0.131761	0.60401	0.233536
C21orf7__chr21	0.769893	0.399955	-0.369938	0.0844319	0.409362	0.458536	-0.850587	0.0115749	1.07349	0.387892	0.338626
C21orf88__chr21	0.561499	0.149255	-0.412244	0.613691	0.963377	0.760898	-0.444824	0.377574	0.21205	0.0162039	0.118673
C21orf91__chr21	-0.0131136	-0.0461891	-0.0330755	0.994572	0.935373	0.966136	0.144464	0.228408	0.00236361	0.0290151	0.0149616
C22orf23__chr22	0.0235128	0.0445004	0.0209876	0.998761	0.995572	0.999013	-0.26518	0.53671	0.000538417	0.00192753	0.000428999
C22orf28__chr22	-0.0576674	-0.61675	-0.559082	0.648966	0.000157041	0.000273209	-0.113347	0.0688354	0.187778	3.80399	3.5635
C22orf29__chr22	0.171147	0.210011	0.0388643	0.534792	0.407398	0.964863	-0.123212	0.359484	0.271815	0.389981	0.0155342
C22orf32__chr22	0.122041	0.773654	0.651613	0.47204	0.00053514	0.00135752	0.231829	0.027384	0.326021	3.27153	2.86725
C22orf39__chr22	-0.0681798	-0.376165	-0.307986	0.948745	0.275979	0.397798	0.0644995	0.731498	0.0228505	0.559124	0.400338
C22orf46__chr22	-0.0823678	0.0313615	0.113729	0.963064	0.994529	0.931149	0.23391	0.397095	0.0163448	0.00238265	0.0309807
C2CD2L__chr11	-0.180951	0.034648	0.2156	0.867304	0.99467	0.818652	-0.175715	0.563112	0.0618287	0.00232101	0.0869007
C2CD2__chr21	-0.296998	-1.78593	-1.48893	0.857678	0.0417628	0.0811453	-0.662529	0.19434	0.0666758	1.37921	1.09074
C2CD3__chr11	-0.107404	-0.382559	-0.275155	0.950882	0.558531	0.729266	-0.19373	0.527429	0.0218736	0.252953	0.137114
C2CD4C__chr19	-0.0894663	0.488638	0.578105	0.931099	0.198517	0.125274	0.0516663	0.806444	0.031004	0.702201	0.902138
C2CD5__chr12	-0.761165	-0.171785	0.58938	0.0934916	0.835534	0.195589	0.332743	0.218133	1.02923	0.0780359	0.708655
C2orf15__chr2	0.248219	0.507884	0.259665	0.845053	0.523021	0.832144	-0.557725	0.173794	0.0731163	0.28148	0.0798018
C2orf29__chr2	0.167851	-0.474052	-0.641903	0.33878	0.0114013	0.00256457	-0.119204	0.22864	0.470082	1.94305	2.59099
C2orf40__chr2	-0.547917	-0.722941	-0.175024	0.0755851	0.0260698	0.674603	0.216618	0.233326	1.12156	1.58386	0.170952
C2orf42__chr2	-0.106342	0.061711	0.168053	0.878473	0.956686	0.730935	0.382233	0.0742758	0.0562716	0.0192305	0.136121
C2orf43__chr2	0.00921341	0.0559867	0.0467733	0.999737	0.990336	0.993241	0.119929	0.739378	0.000114405	0.00421763	0.00294519
C2orf44__chr2	-0.182079	-1.51733	-1.33525	0.963935	0.157962	0.219109	-0.6838	0.27864	0.0159524	0.801447	0.659339
C2orf47__chr2	0.211827	-0.980555	-1.19238	0.970222	0.555516	0.434992	-0.696551	0.380904	0.013129	0.255303	0.361519
C2orf49__chr2	0.236922	-0.407129	-0.64405	0.844988	0.623891	0.345425	-0.138656	0.701633	0.0731497	0.204891	0.461646
C2orf54__chr2	0.264251	0.354882	0.0906312	0.748644	0.604713	0.965044	0.17588	0.566935	0.125724	0.218451	0.0154531
C2orf66__chr2	-0.0538773	0.42665	0.480528	0.987206	0.48947	0.414792	0.440921	0.176057	0.00559209	0.310274	0.382169
C2orf68__chr2	-0.683134	-0.586995	0.0961389	0.00286597	0.00613687	0.710094	0.141079	0.194891	2.54273	2.21205	0.148684
C2orf69__chr2	-0.2553	-0.215968	0.0393314	0.338308	0.443101	0.969515	0.450662	0.0157233	0.470687	0.353498	0.0134453
C2orf72__chr2	-0.902789	-1.24836	-0.34557	0.395651	0.206784	0.855902	0.627863	0.27605	0.402688	0.684482	0.0675759
C2orf74__chr2	-0.240196	-0.969075	-0.728879	0.934875	0.390474	0.566484	-0.633285	0.299635	0.0292464	0.408408	0.246812
C2orf76__chr2	-0.0375519	-0.15203	-0.114478	0.998531	0.976289	0.986462	-0.0808245	0.896178	0.000638292	0.0104216	0.00591962
C2orf80__chr2	-0.219376	1.77466	1.99403	0.781416	0.00356248	0.00195209	0.671577	0.0428085	0.107118	2.44825	2.7095
C2orf81__chr2	-0.712103	-1.15163	-0.439525	0.573094	0.278167	0.79872	-0.517557	0.38406	0.241774	0.555694	0.0976054
C2orf88__chr2	0.252703	0.876109	0.623406	0.891492	0.31664	0.528347	0.0991464	0.832046	0.0498823	0.499434	0.277081
C2orf91__chr2	-0.0481843	1.7551	1.80328	0.996973	0.079031	0.0719747	0.614077	0.290993	0.0013165	1.1022	1.14282
C3AR1__chr12	0.223921	0.0853552	-0.138565	0.536979	0.905764	0.775738	-0.0583769	0.73264	0.270043	0.0429848	0.110285
C3orf14__chr3	0.547721	-0.0900239	-0.637745	0.00875039	0.740941	0.00415498	0.097327	0.354981	2.05797	0.130216	2.38143
C3orf17__chr3	0.192825	-0.0962789	-0.289104	0.699086	0.910795	0.471913	-0.167364	0.410949	0.155469	0.0405794	0.326138
C3orf18__chr3	-0.424045	-0.0614796	0.362565	0.818878	0.995665	0.86294	0.212591	0.719797	0.086781	0.00188673	0.0640195
C3orf33__chr3	-0.321199	-0.294137	0.0270619	0.680506	0.72172	0.997085	0.594613	0.0978751	0.167168	0.141631	0.00126782
C3orf35__chr3	-0.43416	0.561199	0.99536	0.410998	0.255698	0.0453849	-0.0623192	0.817335	0.386161	0.592273	1.34309
C3orf37__chr3	-0.335648	-1.3673	-1.03165	0.852838	0.146081	0.288933	-0.741792	0.190785	0.0691337	0.835408	0.539203
C3orf38__chr3	-0.202072	-0.677402	-0.47533	0.579359	0.0297867	0.108212	0.290442	0.115916	0.237053	1.52598	0.965726
C3orf43__chr3	-0.0868884	0.104729	0.191617	0.839035	0.777534	0.463391	-0.129893	0.334685	0.0762198	0.109281	0.334052
C3orf52__chr3	0.584582	0.165134	-0.419448	0.132562	0.800106	0.29869	-0.854417	0.00629609	0.877581	0.0968526	0.524779
C3orf58__chr3	0.0212616	-0.560272	-0.581533	0.997456	0.250392	0.230153	-0.250426	0.364619	0.00110614	0.601379	0.637983
C3orf62__chr3	-0.187232	0.392751	0.579983	0.740033	0.319362	0.123701	0.302235	0.184418	0.130749	0.495717	0.907627
C3orf67__chr3	-0.00371145	0.137952	0.141664	0.999969	0.958633	0.956444	0.534185	0.235716	1.33771e-05	0.0183477	0.0193406
C3orf70__chr3	-0.155265	0.975706	1.13097	0.879766	0.0503447	0.0280017	1.02748	0.00753707	0.055633	1.29805	1.55282
C3orf72__chr3	-0.0608213	1.4871	1.54793	0.996829	0.23107	0.210152	1.06068	0.156034	0.00137929	0.636257	0.677467
C4orf19__chr4	-0.232128	0.618789	0.850917	0.804689	0.278311	0.124413	0.377673	0.249559	0.0943718	0.555469	0.905134
C4orf21__chr4	-0.0603433	-0.729741	-0.669397	0.985721	0.204047	0.249633	0.0300561	0.92463	0.00624618	0.690269	0.602697
C4orf26__chr4	-0.152956	0.775973	0.928929	0.982073	0.648413	0.54736	-0.346474	0.632688	0.00785616	0.188148	0.261727
C4orf27__chr4	-0.519916	-0.432994	0.0869213	0.0061016	0.0144615	0.699998	0.178423	0.0821082	2.21456	1.83979	0.154903
C4orf29__chr4	-0.215192	-0.16934	0.045852	0.877821	0.921843	0.993974	-0.502538	0.20928	0.0565939	0.035343	0.00262502
C4orf32__chr4	0.308849	-0.473561	-0.782409	0.721476	0.48838	0.191691	-0.653474	0.0861052	0.141778	0.311242	0.717398
C4orf33__chr4	0.295122	0.538235	0.243114	0.646585	0.285437	0.738699	-0.122973	0.654049	0.189374	0.54449	0.131532
C4orf3__chr4	0.184091	-0.359797	-0.543888	0.697014	0.304227	0.106545	-0.225177	0.257635	0.156758	0.516802	0.972466
C4orf46__chr4	-0.456565	-0.611271	-0.154705	0.0283805	0.00763607	0.495891	-0.106775	0.349911	1.54698	2.11713	0.304614
C4orf47__chr4	-0.118763	-0.308921	-0.190158	0.902334	0.530572	0.773717	-0.049306	0.832064	0.0446325	0.275256	0.111418
C4orf48__chr4	0.0035208	0.973419	0.969898	0.999878	0.0147756	0.0150191	0.407171	0.0797081	5.29824e-05	1.83046	1.82335
C4orf52__chr4	0.482075	-0.478397	-0.960472	0.176625	0.180195	0.0145944	-0.231074	0.269952	0.752948	0.744256	1.83581
C5AR1__chr19	0.448649	-0.122897	-0.571546	0.74668	0.977298	0.631059	-0.0798487	0.87608	0.126866	0.00997305	0.19993
C5__chr9	-0.994794	-1.20578	-0.210989	0.371197	0.256243	0.948787	0.166556	0.774373	0.430396	0.591348	0.0228311
C5orf15__chr5	0.0266701	-0.340853	-0.367523	0.991231	0.309766	0.265758	-0.283984	0.150135	0.00382491	0.508966	0.575513
C5orf22__chr5	0.153222	-0.360843	-0.514065	0.515955	0.07594	0.0188534	-0.106298	0.36216	0.287388	1.11953	1.72461
C5orf24__chr5	-0.0469785	0.174284	0.221263	0.900234	0.303166	0.175466	0.305529	0.0126816	0.0456445	0.518319	0.755808
C5orf28__chr5	-0.143394	-0.912114	-0.76872	0.959153	0.261643	0.363903	0.360153	0.42841	0.0181121	0.582291	0.439015
C5orf30__chr5	-0.745385	-0.943142	-0.197757	0.106071	0.0466248	0.796428	-0.589164	0.0539524	0.974405	1.33138	0.0988535
C5orf34__chr5	-0.0870461	-0.236748	-0.149702	0.982495	0.879702	0.949399	-0.221837	0.59609	0.00766963	0.0556645	0.0225512
C5orf38__chr5	0.164845	-0.246196	-0.411041	0.695012	0.468953	0.172089	-0.559737	0.0130409	0.158008	0.32887	0.764247
C5orf42__chr5	-0.0563844	-0.102961	-0.0465766	0.990373	0.968378	0.993417	0.054498	0.880442	0.00420134	0.0139553	0.00286837
C5orf44__chr5	0.281843	0.560742	0.2789	0.424657	0.0819729	0.431281	0.0599004	0.73853	0.371962	1.08633	0.36524
C5orf46__chr5	1.00794	0.60047	-0.407473	0.0708432	0.293595	0.533663	-0.760109	0.0420316	1.1497	0.532252	0.272733
C5orf49__chr5	-0.225458	-1.10562	-0.880161	0.864877	0.0960263	0.186149	-0.103571	0.779878	0.0630456	1.01761	0.73014
C5orf4__chr5	-0.452137	-1.2836	-0.831468	0.20418	0.00348727	0.0265545	-0.723691	0.00863235	0.689988	2.45751	1.57586
C5orf51__chr5	-0.348682	-0.42648	-0.0777984	0.18115	0.101132	0.89305	0.377594	0.0346973	0.741962	0.995111	0.0491243
C5orf54__chr5	-0.204966	-0.248164	-0.0431973	0.706487	0.608809	0.98379	0.299008	0.194149	0.150896	0.215519	0.00709771
C5orf55__chr5	0.0297331	-0.896628	-0.926361	0.998816	0.39946	0.378961	-0.174062	0.750881	0.000514576	0.398527	0.421405
C5orf56__chr5	-0.419068	-1.16268	-0.74361	0.712361	0.142082	0.383878	-0.193985	0.663136	0.1473	0.847461	0.415807
C5orf63__chr5	0.354958	0.50588	0.150922	0.831554	0.695444	0.966356	0.334896	0.522395	0.0801097	0.157738	0.0148628
C5orf64__chr5	-0.115828	0.778871	0.894699	0.95556	0.208503	0.144678	0.0333719	0.922292	0.0197423	0.680887	0.839599
C6__chr5	0.169565	0.399599	0.230034	0.886183	0.540342	0.803605	0.110843	0.717931	0.0524767	0.267331	0.0949573
C6orf106__chr6	-0.00894799	0.272116	0.281064	0.999225	0.526508	0.506739	-0.178319	0.395254	0.000336805	0.278595	0.295215
C6orf118__chr6	-0.497351	-0.897116	-0.399765	0.253432	0.0418489	0.384366	-0.289678	0.250799	0.596139	1.37832	0.415255
C6orf120__chr6	0.0691506	-1.26262	-1.33177	0.994572	0.243184	0.214859	-0.716552	0.253925	0.00236389	0.614065	0.667846
C6orf132__chr6	0.0306627	-0.213428	-0.244091	0.9909	0.661689	0.58905	-0.255027	0.237254	0.00397016	0.179346	0.229848
C6orf136__chr6	-0.308614	-0.0447581	0.263856	0.292316	0.968543	0.388224	-0.0858414	0.591201	0.534148	0.013881	0.410918
C6orf141__chr6	0.217903	-0.302854	-0.520757	0.768911	0.613827	0.284272	-0.0656993	0.802974	0.114124	0.211954	0.546266
C6orf147__chr6	0.246641	0.136404	-0.110237	0.803521	0.933639	0.955968	0.439966	0.210363	0.0950027	0.0298211	0.0195566
C6orf15__chr6	-0.450646	-0.505205	-0.0545598	0.25587	0.195733	0.974999	0.339011	0.153298	0.59198	0.708335	0.010996
C6orf163__chr6	-0.822744	-0.609212	0.213532	0.140857	0.292468	0.833746	0.350333	0.285554	0.85122	0.533922	0.0789664
C6orf164__chr6	-0.16571	-0.451638	-0.285927	0.712984	0.150007	0.402339	0.210356	0.256478	0.146921	0.823889	0.395407
C6orf165__chr6	-0.60201	-0.709305	-0.107295	0.436165	0.333587	0.970141	-0.0266915	0.945225	0.360349	0.47679	0.0131651
C6orf170__chr6	-0.309209	0.294317	0.603526	0.620189	0.646619	0.220496	-0.1327	0.628277	0.207476	0.189352	0.6566
C6orf1__chr6	0.0298763	1.14489	1.11502	0.997376	0.0847594	0.092522	0.378074	0.325647	0.0011413	1.07181	1.03375
C6orf203__chr6	-0.170732	0.293698	0.46443	0.388835	0.109345	0.0194109	0.421603	0.00509025	0.410235	0.9612	1.71196
C6orf211__chr6	0.0961599	-0.482296	-0.578456	0.958108	0.397482	0.286225	-0.438423	0.169437	0.0185856	0.400682	0.543292
C6orf226__chr6	0.15887	0.284102	0.125232	0.481533	0.150766	0.621871	0.321643	0.0227246	0.317374	0.821697	0.2063
C6orf47__chr6	0.061894	-0.355125	-0.417019	0.990416	0.739754	0.66497	-0.433172	0.300141	0.00418244	0.130913	0.177198
C6orf48__chr6	0.396087	0.502005	0.105918	0.0124435	0.00396047	0.52577	0.139042	0.116001	1.90506	2.40225	0.279204
C6orf52__chr6	0.365144	0.0500292	-0.315115	0.718684	0.993463	0.779191	-0.487309	0.240707	0.143462	0.0028483	0.108356
C6orf57__chr6	0.250285	-0.765715	-1.016	0.819229	0.226647	0.104238	-0.421996	0.253321	0.0865947	0.644651	0.981974
C6orf62__chr6	0.360464	0.381202	0.0207378	0.00208421	0.00155273	0.934404	0.328253	0.00047974	2.68106	2.8089	0.0294653
C6orf70__chr6	0.0745859	0.295215	0.220629	0.908127	0.29096	0.471473	0.162848	0.302668	0.0418535	0.536167	0.326543
C6orf89__chr6	-0.0292323	0.0699403	0.0991727	0.992058	0.955663	0.913497	0.086717	0.677251	0.00346277	0.0196952	0.0392928
C6orf99__chr6	0.236747	0.194285	-0.0424627	0.919746	0.94497	0.997275	0.013102	0.979647	0.0363319	0.0245821	0.00118517
C7orf10__chr7	-0.0707097	-1.09784	-1.02713	0.979373	0.052794	0.0672849	-0.167672	0.592117	0.0090518	1.27742	1.17208
C7orf13__chr7	0.380376	1.00909	0.628712	0.0364785	0.000288517	0.00365359	0.160862	0.135582	1.43796	3.53983	2.43728
C7orf25__chr7	0.423771	-0.897355	-1.32113	0.736492	0.308682	0.11832	-0.697671	0.173997	0.132832	0.510488	0.926943
C7orf26__chr7	0.105042	0.678685	0.573643	0.880061	0.0455225	0.0835114	0.033541	0.855317	0.0554873	1.34177	1.07825
C7orf29__chr7	0.175554	-0.0892052	-0.264759	0.424514	0.781681	0.186616	-0.403796	0.00912459	0.372108	0.106971	0.729051
C7orf31__chr7	0.721141	-0.299972	-1.02111	0.561127	0.897178	0.345521	-0.836768	0.176935	0.250939	0.0471214	0.461525
C7orf41__chr7	-0.154729	1.00745	1.16217	0.807881	0.0145703	0.00747199	0.753336	0.00919944	0.0926524	1.83653	2.12656
C7orf43__chr7	0.427252	1.17395	0.746702	0.788811	0.235883	0.510934	-0.0784172	0.8853	0.103027	0.627304	0.291636
C7orf49__chr7	0.295383	-0.396142	-0.691524	0.804281	0.68332	0.355697	-0.417633	0.309875	0.0945922	0.165376	0.44892
C7orf50__chr7	0.753569	0.162688	-0.590881	0.00513184	0.543173	0.016192	-0.208859	0.131679	2.28973	0.265062	1.7907
C7orf53__chr7	-0.343284	-1.61997	-1.27669	0.778905	0.0402343	0.0947779	-0.785548	0.102142	0.108516	1.3954	1.02329
C7orf55__chr7	-0.152416	-0.0756457	0.0767703	0.775081	0.937202	0.935404	0.180446	0.352525	0.110653	0.0281666	0.0290007
C7orf60__chr7	-0.130174	0.599269	0.729444	0.671327	0.0158108	0.00628847	-0.0410984	0.745238	0.173066	1.80105	2.20145
C7orf61__chr7	1.3778	0.23233	-1.14547	0.0533182	0.870022	0.101095	-0.856547	0.0613921	1.27312	0.0604697	0.99527
C7orf63__chr7	-0.773797	-0.319246	0.454551	0.223481	0.729712	0.545003	0.601098	0.123394	0.650759	0.136849	0.263601
C7orf73__chr7	0.0156275	-0.130688	-0.146316	0.991147	0.568573	0.500574	-0.0182569	0.861684	0.00386208	0.245213	0.300532
C8orf31__chr8	-0.0479104	-0.295189	-0.247279	0.98482	0.588077	0.682243	0.0292068	0.904966	0.00664312	0.230566	0.166061
C8orf33__chr8	-0.0544903	-0.263344	-0.208853	0.924756	0.237928	0.375069	-0.0596716	0.629181	0.0339727	0.623555	0.425889
C8orf34__chr8	-0.220768	-0.421716	-0.200948	0.872815	0.625957	0.893017	0.322498	0.403206	0.0590777	0.203455	0.0491401
C8orf37__chr8	-0.230773	-0.369368	-0.138594	0.405345	0.146483	0.698687	-0.253667	0.111493	0.392175	0.834212	0.155718
C8orf40__chr8	-0.243934	-0.450473	-0.206539	0.426334	0.105489	0.529828	-0.0805889	0.607273	0.37025	0.976792	0.275865
C8orf42__chr8	-0.564803	-0.413838	0.150965	0.745043	0.85071	0.978201	-0.707601	0.293922	0.127819	0.0702186	0.00957196
C8orf44__chr8	-0.187283	1.03879	1.22607	0.953094	0.299688	0.20796	0.504895	0.365528	0.0208644	0.523331	0.68202
C8orf46__chr8	1.07921	0.188002	-0.891205	0.00822267	0.709545	0.0197561	-0.571105	0.0232905	2.08499	0.14902	1.7043
C8orf47__chr8	-0.217623	-0.35841	-0.140787	0.802442	0.569874	0.910152	0.0199286	0.944773	0.0955862	0.244221	0.0408858
C8orf48__chr8	-0.382339	-1.10504	-0.722698	0.82059	0.260078	0.520768	-0.0368105	0.945071	0.085874	0.584897	0.283356
C8orf4__chr8	0.808487	0.365746	-0.442741	0.0331656	0.338703	0.228361	0.326353	0.1431	1.47931	0.470181	0.641379
C8orf58__chr8	-0.271752	-0.68236	-0.410608	0.174173	0.00472672	0.0455531	0.40061	0.00943115	0.75902	2.32544	1.34148
C8orf59__chr8	0.304834	-0.104037	-0.40887	0.0703141	0.629549	0.0222542	-0.0189168	0.838844	1.15296	0.200971	1.65259
C8orf76__chr8	0.0446473	-0.274555	-0.319202	0.962814	0.309419	0.224188	0.0202801	0.888456	0.0164577	0.509453	0.649387
C8orf82__chr8	-0.234025	-0.525091	-0.291066	0.787763	0.35271	0.696818	-0.299889	0.332528	0.103605	0.452583	0.15688
C8orf86__chr8	-0.281732	0.486256	0.767989	0.912474	0.767361	0.537602	0.609675	0.318015	0.0397796	0.115	0.26954
C9__chr5	-0.161454	0.99247	1.15392	0.95769	0.270781	0.190826	0.862223	0.115648	0.0187749	0.567381	0.719363
C9orf114__chr9	-0.336854	-0.849527	-0.512674	0.687555	0.160066	0.447339	-0.355365	0.313436	0.162693	0.795701	0.349364
C9orf116__chr9	-0.478098	-0.902721	-0.424624	0.254228	0.0351111	0.323499	-0.100667	0.66253	0.594777	1.45456	0.490127
C9orf123__chr9	0.283484	-0.440035	-0.723519	0.199162	0.0501718	0.00564919	-0.357158	0.0225893	0.700793	1.29954	2.24801
C9orf135__chr9	-0.0207584	0.30723	0.327988	0.998647	0.753871	0.72621	-0.205829	0.569274	0.000588055	0.122703	0.138938
C9orf142__chr9	-0.0106532	-0.0165136	-0.00586041	0.998593	0.996625	0.999574	0.037567	0.834467	0.00061131	0.00146838	0.000185025
C9orf152__chr9	0.919611	0.204103	-0.715508	0.0889142	0.835957	0.185868	-0.483114	0.144278	1.05103	0.077816	0.730794
C9orf156__chr9	0.0891521	0.198302	0.10915	0.960011	0.821554	0.94086	0.153118	0.586627	0.0177239	0.0853638	0.0264751
C9orf163__chr9	0.213164	-0.0171274	-0.230292	0.927285	0.999506	0.91583	0.161448	0.741517	0.0327868	0.000214415	0.0381852
C9orf169__chr9	0.402234	0.93801	0.535776	0.317442	0.0229309	0.164496	0.129271	0.553009	0.498336	1.63958	0.783846
C9orf16__chr9	-0.153825	0.480281	0.634106	0.405871	0.0117883	0.00303128	0.217724	0.0533596	0.391612	1.92855	2.51837
C9orf171__chr9	-0.581595	-0.798107	-0.216512	0.31212	0.147861	0.825586	0.00782483	0.979693	0.505678	0.830145	0.0832375
C9orf24__chr9	0.00736474	-0.179113	-0.186478	0.999912	0.949791	0.945733	0.530597	0.30793	3.81596e-05	0.0223719	0.0242316
C9orf37__chr9	0.172565	-0.198228	-0.370793	0.762173	0.702365	0.337661	0.0460681	0.82208	0.117946	0.153437	0.471519
C9orf3__chr9	0.714858	-0.4226	-1.13746	0.207955	0.523036	0.0488187	-0.701071	0.0585751	0.682032	0.281468	1.31141
C9orf40__chr9	0.0492148	-0.632042	-0.681257	0.977316	0.0870642	0.0672735	-0.597904	0.0227599	0.00996518	1.06016	1.17216
C9orf41__chr9	0.520786	0.646713	0.125927	0.401168	0.269537	0.939877	0.115595	0.717705	0.396674	0.569382	0.0269288
C9orf43__chr9	0.122524	-0.0169763	-0.1395	0.907809	0.998114	0.882695	-0.42029	0.126357	0.0420056	0.000819674	0.0541891
C9orf64__chr9	0.158682	0.144627	-0.014055	0.857453	0.879576	0.998762	-0.617911	0.043348	0.0667894	0.0557267	0.000537938
C9orf69__chr9	0.0735067	-0.0143761	-0.0878828	0.949971	0.998022	0.929519	-0.00218731	0.991451	0.0222898	0.000859844	0.0317419
C9orf72__chr9	0.0825807	0.212284	0.129703	0.706025	0.168909	0.452074	-0.146879	0.12471	0.15118	0.772348	0.34479
C9orf78__chr9	0.0268257	0.186216	0.15939	0.911163	0.0635944	0.107365	-0.0321771	0.565276	0.040404	1.19658	0.969135
C9orf85__chr9	-0.0239261	-0.50195	-0.478023	0.998806	0.616642	0.642945	-0.667885	0.162619	0.000518716	0.209967	0.191826
C9orf89__chr9	0.271447	0.212516	-0.0589308	0.496995	0.638949	0.963685	-0.200048	0.321495	0.303648	0.194534	0.0160647
C9orf91__chr9	-0.453147	-0.168498	0.284649	0.775565	0.964169	0.902173	0.0105634	0.984834	0.110382	0.015847	0.0447101
C9orf96__chr9	0.22253	0.589767	0.367236	0.905861	0.531163	0.769686	0.251807	0.57553	0.0429382	0.274772	0.113687
C9orf9__chr9	-0.0337007	0.0700667	0.103767	0.995385	0.980257	0.957376	0.470962	0.167858	0.00200874	0.00866017	0.0189174
CA10__chr17	-0.0445999	0.483563	0.528163	0.989746	0.362215	0.308266	-0.354257	0.231444	0.00447613	0.441034	0.511075
CA11__chr19	-0.00768259	1.38647	1.39415	0.999281	0.00151095	0.00146727	-0.02179	0.904234	0.000312446	2.82075	2.83349
CA12__chr15	-1.63279	-1.65509	-0.0223025	0.0174398	0.0164185	0.998386	0.272601	0.448664	1.75846	1.78467	0.000701469
CA13__chr8	0.778725	-0.368243	-1.14697	0.0426488	0.350365	0.00784967	-0.407051	0.0865468	1.37009	0.455479	2.10515
CA14__chr1	-0.554943	-1.21016	-0.655219	0.362212	0.0407534	0.262894	-0.790597	0.0412735	0.441038	1.38984	0.580219
CA2__chr8	-0.378452	-1.63418	-1.25572	0.353973	0.00154468	0.00594128	-0.108605	0.616152	0.45103	2.81116	2.22612
CA5BP1__chrX	0.434772	0.291179	-0.143593	0.486704	0.70822	0.91601	0.066799	0.826479	0.312735	0.149832	0.0380997
CA5B__chrX	-0.0810929	-0.130672	-0.0495791	0.987063	0.966871	0.995138	0.0802849	0.85816	0.00565496	0.0146314	0.00211675
CA8__chr8	0.545038	-0.205315	-0.750352	0.265839	0.795782	0.116072	0.228016	0.406273	0.575381	0.0992059	0.935273
CAAP1__chr9	-0.0560362	-0.900691	-0.844655	0.955193	0.00832393	0.0112647	-0.10376	0.535842	0.0199091	2.07967	1.94828
CAB39L__chr13	0.359502	1.03558	0.676079	0.437749	0.0212048	0.105458	0.303982	0.22193	0.358775	1.67357	0.976919
CAB39__chr2	0.108765	0.457316	0.348551	0.796221	0.0737087	0.169747	0.123949	0.395407	0.0989664	1.13248	0.770199
CABIN1__chr22	-0.179869	-0.367852	-0.187983	0.940054	0.778597	0.93477	-0.483662	0.310035	0.0268472	0.108687	0.0292954
CABLES1__chr18	-0.248525	0.0289917	0.277517	0.303162	0.980222	0.240159	-0.876918	0.000403162	0.518325	0.00867537	0.6195
CABLES2__chr20	-0.494906	0.157085	0.651992	0.0278741	0.533229	0.00808157	-0.258179	0.0636081	1.5548	0.273086	2.0925
CABP1__chr12	-0.36527	-0.00812532	0.357144	0.769346	0.999864	0.777898	0.113448	0.797423	0.113878	5.89597e-05	0.109077
CABP4__chr11	0.140839	0.971732	0.830893	0.959783	0.221739	0.310161	0.341918	0.446642	0.0178271	0.654158	0.508413
CABP5__chr19	-0.517652	-0.521079	-0.0034265	0.191827	0.188639	0.999903	0.236795	0.304318	0.71709	0.724369	4.21584e-05
CABYR__chr18	0.305578	-0.281312	-0.58689	0.863125	0.882302	0.600661	-0.154893	0.75631	0.0639261	0.0543827	0.221371
CACFD1__chr9	-0.0782756	1.11226	1.19053	0.806722	0.000253267	0.000172583	0.215162	0.0760956	0.0932759	3.59642	3.763
CACHD1__chr1	-0.322455	-0.42819	-0.105736	0.7774	0.650248	0.972251	0.768755	0.0903185	0.109356	0.186921	0.0122217
CACNA1A__chr19	-0.164913	1.3694	1.53431	0.855896	0.010056	0.00582268	1.21931	0.00277826	0.067579	1.99757	2.23488
CACNA1B__chr9	0.196849	0.948355	0.751506	0.956821	0.413035	0.556854	-0.160895	0.785722	0.0191694	0.384013	0.254259
CACNA1C__chr12	-0.364861	1.68947	2.05433	0.63661	0.0113309	0.00440495	0.268279	0.429177	0.196127	1.94574	2.35606
CACNA1E__chr1	-0.226691	0.191376	0.418067	0.894784	0.923425	0.696274	-0.596182	0.194505	0.048282	0.0345982	0.15722
CACNA1G__chr17	-0.464827	0.649416	1.11424	0.685076	0.497618	0.180779	0.531739	0.275702	0.164261	0.303104	0.742853
CACNA1H__chr16	-0.444437	0.934838	1.37928	0.390555	0.0555731	0.0108291	0.133927	0.619487	0.408318	1.25514	1.96541
CACNA1I__chr22	0.0995029	0.78651	0.687007	0.984482	0.429501	0.513922	0.444578	0.391667	0.0067922	0.367035	0.289103
CACNA2D1__chr7	0.0985444	0.432938	0.334393	0.956418	0.468086	0.621234	0.0023287	0.993678	0.0193523	0.329674	0.206745
CACNA2D2__chr3	-0.263098	1.25191	1.51501	0.73408	0.024643	0.0105142	-0.062141	0.831323	0.134256	1.60831	1.97822
CACNA2D3__chr3	0.0535613	1.63624	1.58268	0.99377	0.0398386	0.0453509	1.03835	0.0447195	0.00271433	1.3997	1.34341
CACNB1__chr17	-0.460248	1.49611	1.95636	0.272491	0.00333483	0.000809928	0.547564	0.0459068	0.564647	2.47693	3.09155
CACNB2__chr10	-0.0818651	0.562587	0.644452	0.976791	0.389188	0.305566	0.685416	0.0782256	0.0101984	0.409841	0.514895
CACNB3__chr12	-0.123424	1.44782	1.57125	0.597418	5.37e-05	3.33e-05	0.132996	0.230589	0.223722	4.27008	4.47727
CACNB4__chr2	-0.395876	0.814461	1.21034	0.746761	0.34098	0.134834	0.932548	0.0747614	0.126818	0.467271	0.870202
CACNG1__chr17	-0.125017	0.444181	0.569198	0.960261	0.622068	0.475472	-0.549624	0.193172	0.0176107	0.206162	0.322875
CACNG2__chr22	0.641262	1.74323	1.10197	0.630341	0.0911851	0.302465	0.52932	0.372877	0.200424	1.04008	0.519325
CACNG4__chr17	0.00700077	0.896439	0.889438	0.9997	0.0554101	0.0570364	0.241326	0.363017	0.000130121	1.25641	1.24385
CACNG6__chr19	-0.137893	-0.120488	0.0174044	0.762019	0.810785	0.995476	0.0310319	0.849498	0.118034	0.0910942	0.00196925
CACNG7__chr19	-0.0180062	1.04676	1.06477	0.999386	0.208108	0.199555	0.332165	0.479413	0.000266611	0.681712	0.699938
CACNG8__chr19	-0.210424	1.15962	1.37004	0.897405	0.10677	0.0606839	-0.187977	0.641978	0.0470117	0.97155	1.21693
CACTIN__chr19	-0.235398	-0.0557231	0.179675	0.458654	0.951588	0.619492	0.131824	0.416248	0.338515	0.0215511	0.207964
CACUL1__chr10	-0.0734776	-0.215136	-0.141658	0.692906	0.106674	0.307231	-0.271174	0.00890438	0.159326	0.97194	0.512534
CACYBP__chr1	0.0735818	-0.398429	-0.47201	0.716519	0.0116317	0.00515881	-0.264685	0.0124291	0.144772	1.93436	2.28745
CADM1__chr11	-0.332529	0.345197	0.677726	0.252464	0.232072	0.0252825	0.291416	0.103893	0.5978	0.634377	1.59718
CADM2__chr3	-0.325361	-0.165054	0.160307	0.469003	0.807095	0.816625	1.05068	0.00257393	0.328824	0.0930752	0.0879775
CADM3__chr1	-0.550054	1.48382	2.03388	0.269184	0.0081502	0.00165787	0.262099	0.350992	0.56995	2.08883	2.78045
CADM4__chr19	0.137823	0.782264	0.64444	0.718102	0.00948785	0.0227433	0.388207	0.033237	0.143814	2.02283	1.64315
CADPS2__chr7	-0.949518	0.577373	1.52689	0.0566596	0.246471	0.00737982	-0.614871	0.0568067	1.24673	0.608234	2.13195
CADPS__chr3	-0.173492	1.03198	1.20547	0.884982	0.0672448	0.0374465	0.184434	0.558411	0.0530657	1.17234	1.42659
CAD__chr2	-0.0827206	-1.55625	-1.47353	0.993139	0.169222	0.194957	-0.661591	0.315401	0.00299012	0.771543	0.710061
CAHM__chr6	-0.1692	-0.795942	-0.626742	0.705609	0.019683	0.0520264	-0.409354	0.0512563	0.151436	1.70591	1.28378
CALB1__chr8	0.446669	-0.247485	-0.694154	0.297553	0.651897	0.0940609	-0.393189	0.125566	0.526436	0.185821	1.02659
CALB2__chr16	0.554645	-0.524433	-1.07908	0.81562	0.832877	0.493412	-0.227892	0.766044	0.0885119	0.0794192	0.30679
CALCB__chr11	0.496104	-0.0676919	-0.563796	0.105394	0.939692	0.0687185	-0.467994	0.0288246	0.977183	0.0270145	1.16293
CALCOCO1__chr12	-0.385798	0.459692	0.84549	0.378263	0.272322	0.0441836	0.215709	0.360283	0.422207	0.564918	1.35474
CALCOCO2__chr17	-0.403057	-0.924413	-0.521356	0.227734	0.0122656	0.113596	-0.312343	0.126626	0.642572	1.91131	0.944635
CALCRL__chr2	0.232078	0.110821	-0.121257	0.434183	0.808798	0.777017	-0.482995	0.0149904	0.362327	0.09216	0.10957
CALCR__chr7	-0.323461	0.71369	1.03715	0.51774	0.095389	0.0232371	0.453451	0.0941298	0.285888	1.0205	1.63382
CALD1__chr7	0.818684	-0.640052	-1.45874	0.00433262	0.0140799	0.000193874	-0.614991	0.0027338	2.36325	1.8514	3.71248
CALM1__chr14	-0.0553891	-0.341481	-0.286092	0.904379	0.0838135	0.145087	0.227712	0.0732149	0.0436494	1.07669	0.838371
CALM2__chr2	0.201732	0.153537	-0.0481951	0.000228706	0.00103141	0.150078	-0.0286808	0.160282	3.64072	2.98657	0.823683
CALM3__chr19	0.135634	0.559164	0.423531	0.235452	0.000665646	0.00291391	-0.00220387	0.971961	0.628098	3.17676	2.53552
CALML4__chr15	-1.02987	-0.877578	0.152287	0.00572454	0.0122733	0.748455	-0.40545	0.0515963	2.24226	1.91104	0.125834
CALN1__chr7	-0.106072	0.0470844	0.153156	0.971873	0.994372	0.94255	0.00996401	0.97992	0.0123903	0.00245102	0.0256958
CALR__chr19	0.456594	-0.932981	-1.38958	0.195527	0.0155693	0.00222919	-0.514315	0.0335284	0.708792	1.80773	2.65185
CALU__chr7	0.147181	-0.956981	-1.10416	0.663688	0.00276171	0.00130365	-0.438778	0.0171997	0.178036	2.55882	2.88484
CALY__chr10	0.0875312	0.842309	0.754777	0.967579	0.122124	0.166949	0.295213	0.350244	0.0143134	0.9132	0.777415
CAMK1D__chr10	0.494529	-0.15087	-0.645399	0.149798	0.788026	0.063917	0.239269	0.240243	0.824493	0.10346	1.19438
CAMK1G__chr1	-0.743729	-0.0430631	0.700666	0.479557	0.997204	0.516408	-0.799297	0.156296	0.31916	0.00121584	0.287007
CAMK1__chr3	0.153672	-0.485215	-0.638887	0.464988	0.0171445	0.00466687	0.439767	0.00448931	0.332558	1.76588	2.33097
CAMK2A__chr5	0.369795	1.4124	1.04261	0.917543	0.347176	0.536377	-0.0740888	0.92538	0.0373733	0.45945	0.27053
CAMK2B__chr7	0.510261	2.44625	1.93599	0.424048	0.00160396	0.00532148	0.769313	0.0476142	0.372585	2.79481	2.27397
CAMK2D__chr4	0.552577	0.0393596	-0.513218	0.204445	0.989395	0.243242	0.0373944	0.876656	0.689422	0.00463018	0.613961
CAMK2G__chr10	-0.383112	-0.130221	0.252891	0.704208	0.958165	0.853849	0.149459	0.708042	0.152299	0.0185598	0.0686189
CAMK2N1__chr1	-0.418325	1.05458	1.47291	0.268827	0.0111836	0.00213678	0.831024	0.00557363	0.570528	1.95142	2.67024
CAMK2N2__chr3	-0.0298274	0.836434	0.866261	0.99345	0.0503045	0.0439999	0.396773	0.125426	0.00285406	1.29839	1.35655
CAMK4__chr5	-0.0447011	-0.34985	-0.305149	0.981094	0.37287	0.458927	-0.251098	0.247092	0.00828935	0.428442	0.338257
CAMKK1__chr17	-0.0605477	0.417505	0.478053	0.994457	0.776293	0.720562	-0.0498604	0.922599	0.00241403	0.109975	0.142329
CAMKK2__chr12	-0.0230189	0.800098	0.823117	0.985883	0.00336855	0.00291374	0.152811	0.238998	0.00617442	2.47256	2.53555
CAMKMT__chr2	-0.219639	-0.426104	-0.206465	0.86137	0.590986	0.87612	-0.409926	0.273707	0.0648101	0.228423	0.0574364
CAMKV__chr3	-0.0953293	0.3003	0.39563	0.993834	0.94101	0.900563	-0.266639	0.729033	0.00268608	0.0264057	0.0454857
CAMLG__chr5	-0.137921	0.579759	0.717681	0.760444	0.0521907	0.0220728	0.175965	0.302539	0.118933	1.28241	1.65614
CAMSAP1__chr9	0.301067	0.796531	0.495464	0.197615	0.00465428	0.039556	0.0313107	0.809205	0.70418	2.33215	1.40279
CAMSAP2__chr1	0.0579567	0.634472	0.576516	0.953633	0.0412489	0.0592643	0.220714	0.218474	0.0206189	1.38459	1.22721
CAMSAP3__chr19	0.182156	1.28694	1.10478	0.877553	0.030493	0.0553851	-0.00189102	0.995209	0.0567268	1.5158	1.25661
CAMTA1__chr1	-0.0458566	-0.146016	-0.10016	0.763173	0.134804	0.329196	-0.0657495	0.254947	0.117377	0.870298	0.482546
CAMTA2__chr17	0.376458	1.47805	1.1016	0.594103	0.0168851	0.0560869	0.202355	0.528156	0.226138	1.7725	1.25114
CAND1__chr12	-0.191043	-0.533834	-0.342791	0.751374	0.178315	0.433668	-0.0600811	0.785753	0.124144	0.748812	0.362842
CAND2__chr3	-0.309275	-0.0624429	0.246832	0.643031	0.980819	0.749122	-0.15905	0.579445	0.191768	0.00841128	0.125448
CANT1__chr17	-0.00998983	-0.102596	-0.0926066	0.992841	0.509364	0.570772	-0.0354856	0.636907	0.00312034	0.292972	0.243537
CANX__chr5	0.33886	-0.479734	-0.818595	0.0112134	0.00199659	0.000105073	-0.0915147	0.198651	1.95026	2.69971	3.97851
CAP1__chr1	0.714186	0.133786	-0.5804	0.00292689	0.561371	0.00819708	-0.196316	0.101306	2.53359	0.25075	2.08634
CAP2__chr6	-0.0740727	-0.810354	-0.736281	0.915601	0.0107428	0.0166372	-0.130431	0.418239	0.0382935	1.96888	1.77892
CAPG__chr2	0.700954	-0.350924	-1.05188	0.154018	0.553648	0.0391945	-0.686164	0.0400795	0.812427	0.256766	1.40678
CAPN10__chr2	0.401877	0.155125	-0.246753	0.722912	0.950572	0.881091	-0.450797	0.320019	0.140915	0.022015	0.054979
CAPN14__chr2	-0.238599	-0.264798	-0.0261993	0.748053	0.702149	0.996329	-0.0870759	0.750776	0.126068	0.15357	0.00159721
CAPN1__chr11	0.334116	0.647135	0.313019	0.603088	0.208558	0.638691	-0.280092	0.343841	0.219619	0.680772	0.194709
CAPN2__chr1	0.43885	-0.698838	-1.13769	0.0420451	0.00527155	0.00040092	-0.639638	0.00122636	1.37628	2.27806	3.39694
CAPN5__chr11	0.528308	0.823225	0.294917	0.00497091	0.00047851	0.0625735	0.28581	0.0140201	2.30356	3.32011	1.20361
CAPN6__chrX	-0.479924	-1.52423	-1.04431	0.73228	0.108405	0.28679	-2.83103	0.00140698	0.135323	0.964952	0.542436
CAPN7__chr3	0.000943171	-0.26807	-0.269013	0.999998	0.862959	0.862085	-0.161304	0.712877	8.12756e-07	0.0640098	0.0644497
CAPN9__chr1	-0.0320924	0.356333	0.388426	0.995288	0.587772	0.537133	0.220119	0.466202	0.00205143	0.230791	0.269919
CAPNS1__chr19	0.626846	0.153237	-0.473609	0.00393766	0.433488	0.0150794	-0.416733	0.00450862	2.40476	0.363023	1.82162
CAPRIN1__chr11	0.0959522	0.237858	0.141906	0.173986	0.00502828	0.0493589	0.0702036	0.111381	0.759486	2.29858	1.30663
CAPRIN2__chr12	0.0658296	-0.304968	-0.370798	0.996894	0.936085	0.907447	-0.582219	0.446789	0.0013511	0.0286848	0.0421785
CAPS2__chr12	-0.78043	-0.436705	0.343725	0.245764	0.597391	0.71915	-0.0808366	0.826344	0.609482	0.223741	0.14318
CAPS__chr19	0.113757	-0.249083	-0.36284	0.935156	0.734712	0.538243	-0.329232	0.260166	0.029116	0.133883	0.269021
CAPZA1__chr1	0.132903	-0.0208014	-0.153705	0.212674	0.951703	0.145257	-0.0965327	0.138054	0.672285	0.0214986	0.837864
CAPZA2__chr7	0.0844447	0.0520378	-0.0324069	0.389214	0.673781	0.852547	0.371083	0.000260855	0.409812	0.171481	0.0692815
CAPZB__chr1	0.229851	-0.218427	-0.448278	0.181835	0.206737	0.0168845	-0.109885	0.275903	0.740323	0.684582	1.77251
CARD10__chr22	1.50803	-0.0685338	-1.57657	0.0219802	0.984084	0.0181076	-1.74614	0.00177733	1.65797	0.00696769	1.74214
CARD14__chr17	0.463415	0.464631	0.00121544	0.461863	0.460219	0.999994	-0.0435516	0.88889	0.335487	0.337036	2.64118e-06
CARD8__chr19	-0.285563	-0.327466	-0.0419032	0.254848	0.183924	0.963432	0.0248116	0.856239	0.593718	0.735362	0.0161789
CARHSP1__chr16	-0.0616763	-0.227814	-0.166138	0.82759	0.14976	0.314395	-0.102182	0.272377	0.0821849	0.824603	0.502524
CARKD__chr13	-0.2953	0.10831	0.40361	0.290046	0.818634	0.134448	-0.0488243	0.74658	0.537534	0.0869103	0.871446
CARM1__chr19	-0.355012	-0.0638135	0.291198	0.470631	0.972734	0.589946	-0.151352	0.538556	0.327319	0.0120058	0.229188
CARS2__chr13	-0.0473671	0.0173037	0.0646708	0.991822	0.998903	0.984828	-0.00534852	0.987072	0.00356622	0.000476498	0.00663961
CARS__chr11	0.425261	0.59119	0.165929	0.0422814	0.0102167	0.46966	0.0930771	0.423217	1.37385	1.99069	0.328217
CASC1__chr12	-0.0524988	-0.0350944	0.0174044	0.967894	0.985479	0.996402	-0.053106	0.772661	0.014172	0.0063526	0.00156537
CASC2__chr10	-0.797909	-1.3495	-0.551591	0.344085	0.0917312	0.572271	-0.279085	0.537063	0.463334	1.03748	0.242398
CASC3__chr17	-0.116901	-0.0303493	0.0865512	0.462148	0.94277	0.638915	0.0606489	0.451932	0.335219	0.025594	0.194557
CASC4__chr15	7.09e-05	0.114333	0.114262	1	0.890159	0.890285	0.274442	0.221469	1.98436e-08	0.0505326	0.0504712
CASC5__chr15	0.313173	0.759825	0.446652	0.859163	0.45029	0.740162	0.222174	0.660417	0.0659245	0.346508	0.130673
CASD1__chr7	-0.41081	-0.0101681	0.400641	0.208925	0.998734	0.221853	-0.177557	0.344788	0.680009	0.000550152	0.653934
CASKIN2__chr17	-0.875134	-0.598988	0.276146	0.0364222	0.135452	0.575478	0.157366	0.491142	1.43863	0.868214	0.239971
CASK__chrX	-0.0786466	0.729903	0.80855	0.916541	0.0230449	0.0146871	0.0237814	0.886928	0.0378482	1.63743	1.83307
CASP10__chr2	-0.501526	-0.530627	-0.0291012	0.556452	0.522595	0.997818	0.161067	0.684426	0.254572	0.281835	0.000948783
CASP2__chr7	-0.164713	-0.414657	-0.249944	0.710895	0.183473	0.480275	0.0621195	0.721074	0.148194	0.736429	0.31851
CASP3__chr4	-0.0413107	-1.07987	-1.03856	0.998805	0.486469	0.510567	-0.935176	0.244138	0.000519228	0.312945	0.291947
CASP6__chr4	0.102887	-0.648358	-0.751245	0.837655	0.0255931	0.0133943	-0.379883	0.0405125	0.0769349	1.59188	1.87308
CASP7__chr10	-0.139619	-1.11895	-0.979332	0.878074	0.0179821	0.0317087	-0.564034	0.0511741	0.0564689	1.74516	1.49882
CASP8AP2__chr6	-0.413294	-0.918004	-0.50471	0.381579	0.0428093	0.261358	-0.173489	0.487499	0.418416	1.36846	0.582764
CASP8__chr2	0.25554	0.244881	-0.0106594	0.813072	0.826487	0.999627	-0.0552422	0.874266	0.0898709	0.0827639	0.000162049
CASP9__chr1	-0.316348	-0.0518067	0.264542	0.440826	0.975076	0.551073	0.343978	0.131834	0.355733	0.0109616	0.258791
CASQ1__chr1	-0.765818	-2.07048	-1.30466	0.617599	0.0859113	0.293718	-0.25563	0.704026	0.209293	1.06595	0.532069
CASQ2__chr1	-0.353738	-0.317015	0.0367229	0.510395	0.57591	0.991895	-0.270397	0.314935	0.292094	0.239645	0.00353451
CAST__chr5	0.588787	-0.73378	-1.32257	0.229944	0.128723	0.0137516	-0.531984	0.0852406	0.638378	0.890343	1.86165
CASZ1__chr1	-0.370066	-1.64515	-1.27509	0.689474	0.0216939	0.0599192	-0.444811	0.258357	0.161482	1.66366	1.22243
CATSPER2P1__chr15	0.326224	0.0193733	-0.306851	0.0965689	0.987526	0.117076	-0.24708	0.0563259	1.01516	0.00545161	0.931534
CATSPER2__chr15	-0.239542	-0.256643	-0.0171011	0.743833	0.713719	0.998414	0.252576	0.369211	0.128524	0.146473	0.000689236
CATSPERG__chr19	-0.215425	0.881257	1.09668	0.929388	0.35532	0.227979	-0.32567	0.522426	0.0318031	0.44938	0.642105
CAT__chr11	-0.584083	-1.33209	-0.748012	0.381907	0.0386721	0.235427	0.222073	0.528096	0.418042	1.4126	0.628143
CAV1__chr7	1.54545	0.0667736	-1.47867	0.0143234	0.982557	0.0174593	-1.07209	0.0125435	1.84395	0.00764212	1.75797
CAV2__chr7	1.27013	0.0713901	-1.19874	0.190792	0.993004	0.219887	-1.0066	0.0990695	0.719441	0.00304914	0.657801
CBFA2T2__chr20	-0.351167	0.251311	0.602479	0.234113	0.435305	0.0443219	0.0769055	0.638164	0.630575	0.361207	1.35338
CBFA2T3__chr16	-0.487338	1.32764	1.81497	0.622713	0.0864134	0.0265099	0.512871	0.259615	0.205712	1.06342	1.57659
CBFB__chr16	-0.0731512	-0.474083	-0.400932	0.78169	0.0105578	0.0224073	-0.187152	0.0762209	0.106965	1.97643	1.64961
CBLB__chr3	0.380234	0.622875	0.242641	0.706876	0.426707	0.863924	0.028811	0.942	0.150657	0.36987	0.0635244
CBLL1__chr7	-0.0557692	0.676979	0.732748	0.984991	0.189797	0.153769	0.209261	0.474879	0.00656779	0.72171	0.81313
CBLN1__chr16	0.301829	0.256793	-0.0450354	0.831961	0.874315	0.995784	-0.619976	0.190285	0.0798973	0.0583321	0.00183478
CBLN2__chr18	0.134283	2.10396	1.96968	0.971173	0.0258637	0.0339617	-0.724066	0.178115	0.0127033	1.58731	1.46901
CBLN3__chr14	0.300367	-0.0752806	-0.375647	0.482402	0.949763	0.342203	-0.00320247	0.987752	0.316591	0.0223848	0.465717
CBL__chr11	-0.0372542	0.155444	0.192698	0.930592	0.348664	0.224334	0.206308	0.0487799	0.0312407	0.457592	0.649105
CBR1__chr21	0.289519	0.125556	-0.163964	0.343956	0.792467	0.679625	0.379612	0.0495218	0.463497	0.101019	0.167731
CBR3__chr21	0.2578	0.173333	-0.084467	0.854869	0.930594	0.982904	0.568638	0.194504	0.0681002	0.0312398	0.00748869
CBR4__chr4	-0.18324	-1.12165	-0.938412	0.912019	0.0992981	0.167916	-0.665551	0.116573	0.0399959	1.00306	0.774907
CBS__chr21	-0.13509	-0.963389	-0.828298	0.905169	0.0506532	0.0866422	-0.267448	0.338576	0.0432705	1.29539	1.06227
CBWD1__chr9	0.148762	-0.513433	-0.662195	0.81313	0.159091	0.0719766	-0.0893962	0.662431	0.0898399	0.798355	1.14281
CBX1__chr17	-0.187264	0.399917	0.587182	0.280246	0.02552	0.00428335	0.252207	0.0310261	0.552461	1.59312	2.36822
CBX2__chr17	-0.69549	-1.62105	-0.925563	0.520045	0.0805018	0.341526	-0.712391	0.198254	0.283959	1.09419	0.466576
CBX3P2__chr18	0.0631253	0.146291	0.0831654	0.992199	0.959045	0.986511	-0.493266	0.297196	0.00340135	0.018161	0.00589793
CBX3__chr7	-0.116163	0.0645086	0.180672	0.618048	0.854695	0.349291	0.0580524	0.572839	0.208978	0.0681888	0.456812
CBX4__chr17	-0.262878	0.699871	0.962749	0.310142	0.0120437	0.00251298	0.482063	0.0109869	0.50844	1.91924	2.59981
CBX5__chr12	-0.422532	-0.395273	0.0272584	0.00568127	0.0078557	0.94404	-0.0233047	0.745379	2.24555	2.10481	0.0250094
CBX6__chr22	-0.45519	-0.5682	-0.11301	0.496039	0.356944	0.952724	-0.0303184	0.925284	0.304484	0.4474	0.0210327
CBX7__chr22	0.0224716	0.178823	0.156351	0.999656	0.978514	0.983519	-0.151513	0.84334	0.000149507	0.00943284	0.00721738
CBX8__chr17	-0.783205	-0.479652	0.303553	0.0351021	0.17944	0.444353	0.10374	0.605409	1.45467	0.746081	0.352272
CBY1__chr22	-0.136558	-0.394124	-0.257566	0.862419	0.349446	0.609191	-0.0698788	0.753412	0.0642817	0.45662	0.215247
CC2D1A__chr19	0.0906059	-0.239146	-0.329752	0.990126	0.93385	0.879171	-0.433141	0.461679	0.00430973	0.029723	0.0559268
CC2D1B__chr1	0.528519	-0.361667	-0.890187	0.499208	0.707597	0.190832	-0.857519	0.0555262	0.301718	0.150214	0.719348
CC2D2A__chr4	-0.331441	-0.411678	-0.0802376	0.600799	0.470964	0.96808	0.0612811	0.827565	0.221271	0.327012	0.0140887
CCAR1__chr10	-0.0823856	-0.386908	-0.304522	0.658576	0.0128864	0.0361124	0.102473	0.21833	0.181394	1.88987	1.44234
CCBE1__chr18	-0.271305	-0.00605312	0.265252	0.528474	0.999645	0.54207	0.473213	0.0512484	0.276976	0.000154061	0.265944
CCBL1__chr9	-0.286605	0.23686	0.523465	0.164355	0.261086	0.0190611	0.230083	0.0814988	0.784216	0.583216	1.71985
CCBL2__chr1	0.0149868	-0.352846	-0.367833	0.998568	0.495219	0.469314	-0.499395	0.0826526	0.000622236	0.305203	0.328536
CCDC101__chr16	-0.347243	0.409013	0.756256	0.0126865	0.00582377	0.00022023	-0.306868	0.00368067	1.89666	2.2348	3.65712
CCDC102A__chr16	-0.746456	-1.62117	-0.874715	0.387858	0.0485031	0.290873	-0.246048	0.586235	0.411327	1.31423	0.536296
CCDC102B__chr18	-0.616685	-1.01685	-0.400165	0.384942	0.122165	0.643845	-0.842361	0.0537618	0.414605	0.913055	0.191219
CCDC103__chr17	-0.0221585	0.153727	0.175886	0.998647	0.937577	0.919346	-0.291765	0.454631	0.000587958	0.0279932	0.036521
CCDC104__chr2	-0.410944	-0.0440723	0.366872	0.071866	0.952662	0.104826	0.309966	0.0426001	1.14348	0.0210611	0.97953
CCDC106__chr19	0.090311	0.596001	0.50569	0.91783	0.0874309	0.145077	-0.156614	0.431138	0.0372376	1.05833	0.838402
CCDC107__chr9	0.0126147	-0.21404	-0.226655	0.998645	0.693275	0.665102	-0.240055	0.291723	0.000588655	0.159094	0.177112
CCDC108__chr2	-0.532992	-0.662738	-0.129746	0.149739	0.0757476	0.857317	-0.0109588	0.957624	0.824664	1.12063	0.0668587
CCDC109B__chr4	0.102024	-1.19648	-1.2985	0.936015	0.0152409	0.0104683	-0.116878	0.64242	0.028717	1.81699	1.98012
CCDC111__chr4	-0.0234379	-0.367574	-0.344136	0.995716	0.405668	0.447223	-0.162025	0.483078	0.00186447	0.39183	0.349476
CCDC112__chr5	-0.0633983	1.23851	1.30191	0.861028	0.000119999	9.02e-05	0.663829	0.000508343	0.0649825	3.92082	4.04479
CCDC113__chr16	0.12556	-0.590377	-0.715938	0.973734	0.583704	0.467127	-0.604035	0.242093	0.0115596	0.233807	0.330565
CCDC115__chr2	-0.256046	0.108938	0.364984	0.351696	0.803434	0.159295	0.0225746	0.875904	0.453832	0.0950498	0.797798
CCDC117__chr22	-0.554193	-0.0410673	0.513126	0.0116903	0.945362	0.0165872	0.132125	0.253117	1.93217	0.0244018	1.78023
CCDC11__chr18	-0.161823	-0.0687449	0.0930779	0.932469	0.987338	0.976951	0.198402	0.609956	0.0303658	0.00553425	0.010127
CCDC120__chrX	0.152817	1.06752	0.914703	0.501463	0.000406469	0.000947898	-0.225479	0.0753839	0.299761	3.39097	3.02324
CCDC121__chr2	0.23324	-0.25905	-0.492291	0.85465	0.824844	0.525839	-0.433851	0.263858	0.0682115	0.083628	0.279147
CCDC122__chr13	-0.312138	-0.725497	-0.413359	0.461615	0.0582832	0.287805	-0.169457	0.431907	0.33572	1.23446	0.540901
CCDC124__chr19	0.246009	0.321588	0.0755789	0.837423	0.74307	0.982932	0.0278162	0.939014	0.077055	0.12897	0.00747658
CCDC125__chr5	0.0997302	0.283321	0.183591	0.989041	0.915972	0.963506	0.100161	0.867539	0.00478584	0.0381176	0.0161456
CCDC126__chr7	0.376869	-0.113609	-0.490478	0.667261	0.961587	0.519089	-0.444292	0.247486	0.175704	0.0170115	0.284758
CCDC127__chr5	-0.0486654	-0.128515	-0.0798493	0.966753	0.796107	0.913794	0.0660946	0.693869	0.0146847	0.0990283	0.0391517
CCDC12__chr3	-0.105319	-0.311219	-0.205899	0.958619	0.704776	0.853576	-0.375932	0.270091	0.0183537	0.151949	0.0687579
CCDC130__chr19	-0.254956	0.19937	0.454326	0.434535	0.584442	0.122562	0.00547817	0.973366	0.361975	0.233259	0.911645
CCDC132__chr7	-0.0408311	0.475694	0.516525	0.978651	0.130216	0.101117	0.12017	0.501781	0.00937213	0.885335	0.995174
CCDC134__chr22	-0.454057	-0.543122	-0.0890653	0.405913	0.295661	0.960458	-0.00801152	0.977113	0.391567	0.529206	0.0175215
CCDC135__chr16	0.508316	0.0853552	-0.422961	0.221662	0.946502	0.326525	-0.00747522	0.973955	0.654309	0.0238786	0.486084
CCDC136__chr7	-0.801328	0.0158336	0.817162	0.00536817	0.994438	0.00487195	0.0873086	0.522103	2.27017	0.00242232	2.3123
CCDC137__chr17	0.237343	-0.476106	-0.713449	0.728989	0.330912	0.125329	-0.413716	0.147719	0.137279	0.480288	0.90195
CCDC138__chr2	0.404699	-0.663528	-1.06823	0.696764	0.412526	0.148797	-0.245059	0.5584	0.156915	0.384549	0.827406
CCDC13__chr3	0.33063	0.394009	0.0633786	0.580187	0.474225	0.978331	0.063612	0.814255	0.236432	0.324015	0.00951398
CCDC141__chr2	0.0061016	0.427358	0.421256	0.999905	0.6495	0.656945	0.477192	0.255793	4.11727e-05	0.187421	0.182471
CCDC142__chr2	-0.397068	0.323723	0.720791	0.554938	0.66743	0.199203	-0.00060997	0.998433	0.255755	0.175594	0.700704
CCDC144B__chr17	0.505581	2.57301	2.06743	0.33076	0.000517517	0.00168747	1.08578	0.00630852	0.480488	3.28608	2.77276
CCDC146__chr7	-0.141038	1.06174	1.20277	0.981434	0.403051	0.325537	-0.403397	0.541644	0.00813904	0.39464	0.4874
CCDC147__chr10	0.0197702	-0.0859829	-0.105753	0.996854	0.94268	0.914995	-0.0132203	0.95263	0.0013684	0.0256356	0.038581
CCDC148__chr2	-0.144097	0.123175	0.267273	0.976832	0.983	0.923244	0.0866575	0.884037	0.0101799	0.00744646	0.0346835
CCDC149__chr4	-0.885392	-0.286932	0.59846	0.0501452	0.607078	0.176077	0.00513356	0.983336	1.29977	0.216755	0.754297
CCDC14__chr3	-0.72765	-0.612221	0.115429	0.00252373	0.00602954	0.638538	0.304326	0.0231533	2.59796	2.21972	0.194814
CCDC150__chr2	-1.27954	-2.17428	-0.894746	0.0142094	0.000994795	0.0615318	-0.67162	0.0371831	1.84742	3.00227	1.2109
CCDC151__chr19	-0.0266571	-0.130603	-0.103946	0.991859	0.826835	0.885255	-0.513987	0.0281508	0.00355005	0.0825813	0.0529319
CCDC152__chr5	0.380027	-0.872164	-1.25219	0.705254	0.223627	0.0789146	1.15067	0.0227491	0.151654	0.650476	1.10284
CCDC153__chr11	-0.168263	-0.313554	-0.14529	0.868264	0.628917	0.899457	-0.216052	0.451129	0.0613481	0.201407	0.0460195
CCDC157__chr22	-0.159007	0.203561	0.362567	0.91564	0.866687	0.649414	-0.139553	0.680121	0.0382755	0.0621378	0.187478
CCDC159__chr19	-0.360806	-0.702903	-0.342097	0.592554	0.196326	0.622199	-0.375022	0.241978	0.227272	0.707022	0.206071
CCDC15__chr11	-0.314817	-1.29178	-0.976968	0.725488	0.0416017	0.111007	-0.326117	0.358076	0.139369	1.38089	0.954648
CCDC160__chrX	-0.143654	-0.0203874	0.123267	0.651657	0.990768	0.725239	-0.0464822	0.729427	0.185981	0.00402816	0.139519
CCDC163P__chr1	-0.242479	-0.815531	-0.573053	0.90404	0.37604	0.592453	-0.40359	0.412915	0.0438123	0.424767	0.227346
CCDC164__chr2	0.0877132	-0.110383	-0.198096	0.916833	0.872544	0.658279	-0.0279274	0.881214	0.0377097	0.0592127	0.18159
CCDC167__chr6	0.11962	-0.181335	-0.300955	0.578582	0.322112	0.0866944	-0.224415	0.0532585	0.237635	0.491993	1.06201
CCDC168__chr13	-0.266178	0.78588	1.05206	0.780634	0.187773	0.0785689	0.938005	0.0254427	0.107553	0.726368	1.10475
CCDC170__chr6	-0.0895041	-0.0990266	-0.00952245	0.956845	0.947518	0.999497	0.412808	0.159854	0.0191586	0.0234126	0.00021849
CCDC171__chr9	-0.0777437	0.63778	0.715523	0.96647	0.18197	0.132465	0.500625	0.0967121	0.0148116	0.740001	0.8779
CCDC173__chr2	-0.301162	-0.566766	-0.265604	0.647096	0.267908	0.708939	-0.0807897	0.772012	0.189031	0.572014	0.149391
CCDC174__chr3	0.0253638	0.142402	0.117038	0.995073	0.859153	0.90176	0.211597	0.370645	0.00214522	0.0659297	0.0449091
CCDC176__chr14	-0.507258	0.527884	1.03514	0.404194	0.379136	0.0670893	-0.0189604	0.951412	0.39341	0.421206	1.17335
CCDC177__chr14	-0.818555	0.138929	0.957484	0.139357	0.923361	0.0855491	0.221166	0.483541	0.855873	0.0346285	1.06778
CCDC17__chr1	0.247068	-0.61151	-0.858577	0.706649	0.187166	0.0662396	-0.701275	0.0294541	0.150796	0.727773	1.17888
CCDC18__chr1	-0.137956	-0.789006	-0.65105	0.961108	0.339458	0.45993	-0.297693	0.503579	0.017228	0.469214	0.337308
CCDC22__chrX	-0.188393	-0.701357	-0.512964	0.924407	0.391807	0.583932	-0.244142	0.568364	0.0341368	0.406928	0.233637
CCDC23__chr1	-0.297681	0.945727	1.24341	0.289793	0.00435405	0.00104627	0.136612	0.383635	0.537913	2.36111	2.98036
CCDC24__chr1	-0.209252	-0.930789	-0.721537	0.932107	0.316661	0.475597	-0.866296	0.11835	0.0305341	0.499405	0.322761
CCDC25__chr8	0.151195	-0.302597	-0.453792	0.698762	0.292375	0.10256	-0.177245	0.277481	0.155671	0.53406	0.989024
CCDC28A__chr6	-0.459974	-0.631103	-0.17113	0.139922	0.0486176	0.695105	-0.186437	0.306176	0.854113	1.31321	0.15795
CCDC28B__chr1	-0.0392162	0.50772	0.546937	0.995449	0.506757	0.460472	-0.146863	0.69093	0.00198112	0.2952	0.336797
CCDC30__chr1	-0.812617	-0.753332	0.0592855	0.282995	0.328146	0.991651	-0.363946	0.389294	0.548222	0.483933	0.00364117
CCDC34__chr11	-0.102274	-0.951533	-0.84926	0.904565	0.0166868	0.027275	-0.273607	0.208317	0.0435602	1.77763	1.56424
CCDC3__chr10	0.328862	0.399697	0.0708351	0.717024	0.61942	0.983831	-0.690109	0.0856921	0.144466	0.208015	0.00707966
CCDC40__chr17	-0.767544	-1.19306	-0.425513	0.63307	0.366868	0.8622	-0.633534	0.375157	0.198548	0.43549	0.0643918
CCDC41__chr12	-0.188867	-0.803086	-0.614218	0.891991	0.204152	0.357353	-0.204294	0.564754	0.0496394	0.690045	0.446903
CCDC43__chr17	0.232087	-0.459191	-0.691278	0.816119	0.483932	0.235725	0.0548001	0.864081	0.0882464	0.315216	0.627594
CCDC47__chr17	-0.154767	-0.839735	-0.684967	0.518285	0.00185202	0.00524429	-0.128361	0.284732	0.285431	2.73235	2.28031
CCDC50__chr3	0.150064	0.104036	-0.0460276	0.60614	0.777764	0.950347	-0.126319	0.34444	0.217427	0.109152	0.022118
CCDC51__chr3	0.21692	-0.326056	-0.542976	0.932261	0.855437	0.660986	-0.649043	0.23653	0.0304627	0.0678118	0.179808
CCDC53__chr12	-0.0864451	0.338373	0.424818	0.835124	0.136428	0.0652988	0.133227	0.315135	0.0782492	0.865096	1.18509
CCDC57__chr17	-0.268204	-0.220337	0.047867	0.637144	0.732202	0.984635	-0.0816295	0.73795	0.195763	0.135369	0.00672465
CCDC58__chr3	-0.106092	-0.84422	-0.738129	0.952955	0.121682	0.177626	0.23696	0.447757	0.0209275	0.914773	0.750494
CCDC59__chr12	0.316588	0.0963043	-0.220284	0.232287	0.843721	0.450872	-0.333462	0.0540891	0.633975	0.0738014	0.345947
CCDC61__chr19	0.150069	0.268817	0.118749	0.95995	0.878821	0.974666	0.0258599	0.955886	0.0177515	0.0560994	0.0111442
CCDC64__chr12	0.0226148	1.01485	0.992237	0.992287	0.004313	0.00482697	0.40741	0.0397707	0.00336279	2.36522	2.31633
CCDC65__chr12	-0.974679	-0.819773	0.154905	0.405159	0.513454	0.97374	-0.123637	0.8367	0.392374	0.289498	0.0115572
CCDC66__chr3	-0.262466	-0.376084	-0.113619	0.838931	0.704799	0.966835	0.0612148	0.875358	0.0762736	0.151934	0.0146474
CCDC69__chr5	-0.549379	-0.474922	0.0744575	0.252057	0.337607	0.968382	-0.340827	0.223581	0.598501	0.471589	0.0139531
CCDC6__chr10	-0.0909233	-0.358741	-0.267818	0.779591	0.0782863	0.187553	-0.301713	0.0315567	0.108133	1.10631	0.726877
CCDC71L__chr7	0.0231674	1.06992	1.04675	0.992517	0.00403039	0.00449842	0.632528	0.00793309	0.00326213	2.39465	2.34694
CCDC71__chr3	0.664367	-0.0459466	-0.710313	0.475484	0.995963	0.433464	-0.852339	0.0994881	0.322865	0.00175697	0.363047
CCDC74A__chr2	-0.00384917	-0.258352	-0.254503	0.999571	0.226247	0.234247	-0.479136	0.00535229	0.000186478	0.645417	0.630326
CCDC74B-AS1__chr2	-0.303618	-0.313832	-0.0102147	0.638088	0.620247	0.99945	-0.0723532	0.79332	0.195119	0.207436	0.000238722
CCDC74B__chr2	-0.0763886	0.0472618	0.12365	0.983103	0.993486	0.95653	-0.569132	0.159257	0.00740119	0.00283824	0.0193014
CCDC75__chr2	0.109967	0.330642	0.220675	0.976839	0.8144	0.910975	-0.290501	0.528754	0.010177	0.0891622	0.0404935
CCDC77__chr12	-0.621422	-0.847843	-0.226422	0.1125	0.0373906	0.669572	0.0695718	0.750937	0.948846	1.42724	0.174203
CCDC80__chr3	0.367564	0.501615	0.134051	0.817571	0.694456	0.972772	0.387693	0.457175	0.0874743	0.158355	0.0119891
CCDC81__chr11	0.838988	0.400383	-0.438605	0.20409	0.641145	0.591047	-0.569173	0.155344	0.690179	0.193044	0.228378
CCDC82__chr11	0.03284	0.558838	0.525998	0.927275	0.0017536	0.00240697	0.280967	0.00795624	0.0327913	2.75607	2.61853
CCDC84__chr11	-0.377211	-0.700242	-0.323032	0.440088	0.111108	0.536137	-0.723447	0.0216851	0.35646	0.954254	0.270724
CCDC85A__chr2	-0.0922462	1.09462	1.18687	0.964255	0.0506028	0.0369692	-0.101668	0.73978	0.015808	1.29583	1.43216
CCDC85B__chr11	0.930117	-0.345514	-1.27563	0.328215	0.834206	0.159459	-0.716156	0.189738	0.483842	0.0787269	0.797351
CCDC85C__chr14	-0.0691708	-0.135603	-0.0664321	0.933085	0.772872	0.93806	-0.211448	0.230328	0.0300788	0.111893	0.0277696
CCDC86__chr11	0.714959	-0.763652	-1.47861	0.0700705	0.0552403	0.00282304	-0.342345	0.152043	1.15447	1.25774	2.54928
CCDC87__chr11	0.0050808	-0.244078	-0.249159	0.999845	0.713082	0.703588	-0.0566097	0.826423	6.747e-05	0.146861	0.152681
CCDC88A__chr2	-0.444576	0.452747	0.897324	0.175518	0.167223	0.0136113	0.552789	0.0195728	0.755677	0.776703	1.8661
CCDC88B__chr11	0.48245	0.0651522	-0.417298	0.171574	0.957236	0.244676	-0.455685	0.0517998	0.765549	0.0189811	0.611409
CCDC88C__chr14	-0.0150317	0.300516	0.315547	0.998792	0.639423	0.612989	0.451362	0.135811	0.000524983	0.194211	0.212548
CCDC8__chr19	-0.286346	-1.01859	-0.732242	0.749886	0.0859849	0.220376	-0.340197	0.32252	0.125005	1.06558	0.656836
CCDC90A__chr6	0.242206	-1.07637	-1.31858	0.565794	0.00757136	0.00275049	-0.452257	0.0503133	0.247342	2.12083	2.56059
CCDC90B__chr11	0.147165	0.424059	0.276893	0.428523	0.0198717	0.100515	0.474861	0.00187163	0.368025	1.70177	0.997768
CCDC91__chr12	-0.151967	0.017307	0.169274	0.801711	0.997028	0.762002	0.198267	0.342228	0.0959822	0.00129264	0.118044
CCDC92__chr12	-0.36352	0.547645	0.911165	0.189134	0.0519742	0.00558167	-0.106605	0.496302	0.72323	1.28421	2.25324
CCDC93__chr2	-0.403978	-0.124637	0.279341	0.736266	0.969896	0.860366	-0.0681294	0.879604	0.132965	0.0132748	0.0653169
CCDC94__chr19	0.0572382	-0.0190314	-0.0762696	0.952491	0.994593	0.917711	-0.350842	0.0663523	0.0211393	0.00235447	0.037294
CCDC96__chr4	-0.257124	0.13725	0.394373	0.750285	0.918712	0.529489	0.182235	0.544384	0.124774	0.0368207	0.276143
CCDC97__chr19	-0.379296	-0.279381	0.0999158	0.136843	0.28967	0.826288	0.0816878	0.571179	0.863776	0.538096	0.0828688
CCDC9__chr19	0.11489	0.289627	0.174737	0.970898	0.832944	0.934385	0.0933044	0.825144	0.0128265	0.0793842	0.0294743
CCHCR1__chr6	0.152348	-0.0149392	-0.167287	0.949172	0.999494	0.939147	-0.101266	0.809791	0.0226551	0.00021979	0.0272662
CCKBR__chr11	-0.985826	-0.235367	0.750459	0.0284632	0.691651	0.0800072	-0.222425	0.366233	1.54572	0.160113	1.09687
CCL25__chr19	-0.524449	-0.35429	0.170159	0.474745	0.695187	0.915786	0.159691	0.659938	0.32354	0.157898	0.0382059
CCL27__chr9	0.221824	0.182165	-0.0396596	0.695546	0.779019	0.987744	-0.0996618	0.661184	0.157674	0.108452	0.00535564
CCL28__chr5	0.122922	0.574537	0.451615	0.939428	0.322787	0.473232	0.0856446	0.782436	0.0271366	0.491084	0.324926
CCL2__chr17	1.97933	0.729673	-1.24966	0.000467774	0.0555236	0.00528167	0.870133	0.00478409	3.32996	1.25552	2.27723
CCM2L__chr20	0.412407	1.26968	0.857277	0.450891	0.0173603	0.0813583	0.359561	0.217979	0.345928	1.76044	1.0896
CCM2__chr7	-0.155537	-0.562762	-0.407225	0.866141	0.227071	0.419982	-0.367303	0.185535	0.0624112	0.643839	0.37677
CCNA1__chr13	-0.149555	-0.0440548	0.1055	0.8309	0.983587	0.910598	-0.503556	0.0512431	0.0804514	0.00718716	0.0406735
CCNA2__chr4	-0.526127	-1.92255	-1.39642	0.0587102	9.51e-05	0.000573501	-0.200762	0.218765	1.23129	4.02196	3.24147
CCNB1IP1__chr14	-0.218006	-0.833682	-0.615676	0.403073	0.00433624	0.0181842	-0.48942	0.00873833	0.394616	2.36289	1.74031
CCNB1__chr5	-0.515842	-1.39062	-0.874775	0.0197981	0.000115377	0.00149841	-0.219007	0.0921444	1.70338	3.93788	2.82437
CCNB2__chr15	-0.445769	-1.85327	-1.4075	0.0115502	4.22e-06	2.3e-05	-0.409958	0.00274232	1.93741	5.37511	4.63896
CCNB3__chrX	0.299749	0.111543	-0.188206	0.619126	0.931208	0.819961	-0.192856	0.472701	0.208221	0.0309531	0.0862067
CCNC__chr6	-0.0701088	-0.258511	-0.188402	0.928589	0.416733	0.608296	-0.262183	0.142039	0.0321766	0.380142	0.215885
CCND1__chr11	0.107396	-0.559571	-0.666967	0.878223	0.0949211	0.0512725	-1.0545	0.00105154	0.0563951	1.02264	1.29012
CCND2__chr12	0.25046	-0.624995	-0.875455	0.578847	0.089222	0.0249162	0.314884	0.158974	0.237436	1.04953	1.60352
CCND3__chr6	0.782757	0.139675	-0.643081	0.0324693	0.819585	0.0686271	-0.492486	0.0385897	1.48853	0.086406	1.1635
CCNDBP1__chr15	-0.10543	-0.546584	-0.441154	0.955422	0.356738	0.491209	-0.154259	0.623391	0.0198049	0.44765	0.308734
CCNE1__chr19	-0.55083	-1.16872	-0.617888	0.429045	0.0671917	0.35691	-0.430362	0.248943	0.367497	1.17268	0.447441
CCNE2__chr8	0.7345	-0.317385	-1.05188	0.0044876	0.134921	0.000679807	-0.465904	0.00634546	2.34799	0.86992	3.16761
CCNF__chr16	-0.407022	-0.91303	-0.506008	0.0592812	0.00144538	0.0251075	-0.343514	0.0231166	1.22708	2.84002	1.6002
CCNG1__chr5	0.187297	-0.276103	-0.4634	0.033007	0.0057163	0.000370778	-0.380279	0.000146804	1.48139	2.24289	3.43089
CCNG2__chr4	0.240639	0.945851	0.705212	0.46721	0.00626552	0.0240821	0.383179	0.0498865	0.330488	2.20304	1.61831
CCNH__chr5	-0.242829	0.0059643	0.248794	0.614331	0.99968	0.600822	0.0508935	0.809653	0.211597	0.000138909	0.221254
CCNI__chr4	-0.949455	0.501853	1.45131	0.00264508	0.0482949	0.000266227	0.414407	0.0202834	2.57756	1.3161	3.57475
[truncated: 12,552 more rows]
