# Supplementary material for: Quantitative mapping of transcriptome and proteome dynamics during polarization of human iPSC-derived neurons
Source: bioRxiv preprint, doi:10.1101/2020.04.21.052498, version 1 (2020-04-21)
Supplement: Table 5 [file 052498_file11.xlsx]

## Sheet: all_proteins
Accession	Description	gene name	Score	Coverage	# Proteins	# Unique Peptides	# Peptides	# PSMs	# AAs	MW [kDa]	calc. pI	1_T1/T0	1_log2(T1/T0)	1_T1/T0 Count	1_T1/T0 Variability [%]	2_T1/T0	2_log2(T1/T0)	2_T1/T0 Count	2_T1/T0 Variability [%]	log2(T1/T0)	T1/T0 Variability	1_T2/T1	1_log2(T2/T1)	1_T2/T1 Count	1_T2/T1 Variability [%]	2_T2/T1	2_log2(T2/T1)	2_T2/T1 Count	2_T2/T1 Variability [%]	log2(T2/T1)	T2/T1 Variability	1_T2/T0	1_log2(T2/T0)	1_T2/T0 Count	1_T2/T0 Variability [%]	2_T2/T0	2_log2(T2/T0)	2_T2/T0 Count	2_T2/T0 Variability [%]	log2(T2/T0)	T2/T0 Variability	Cluster	not quantified	contaminants	Spectral counts > 2	high variability	2_T0/1_T0	log2(2_T0/1_T0)	2_T0/1_T0 Count
Q16774	Guanylate kinase OS=Homo sapiens GN=GUK1 PE=1 SV=2 - [KGUA_HUMAN]	GUK1	258.22	61.42	1	8	8	12	197	21.7	6.55	0.989	-0.016	12	19.8	1.018	0.026	12	23.7	0.00504062	21.75	1.052	0.073	12	8	1.186	0.246	12	18.3	0.16221	13.15	1.169	0.225	12	16.7	1.282	0.358	12	11.8	0.29337	14.25	0	FALSE	FALSE	TRUE	FALSE	0.959	-0.06	12
Q6DHV7	Adenosine deaminase-like protein OS=Homo sapiens GN=ADAL PE=2 SV=2 - [ADAL_HUMAN]	ADAL	114.09	5.63	1	2	2	5	355	40.2	6.32	0.971	-0.042	5	8.3	0.978	-0.032	5	7.8	-0.0372659	8.05	1.135	0.183	5	7.6	1.334	0.416	5	18.6	0.303927	13.1	1.088	0.122	5	3.5	1.3	0.379	5	7.3	0.255803	5.4	1	FALSE	FALSE	TRUE	FALSE	0.966	-0.05	5
P49902	Cytosolic purine 5'-nucleotidase OS=Homo sapiens GN=NT5C2 PE=1 SV=1 - [5NTC_HUMAN]	NT5C2	564.49	18.89	1	10	10	21	561	64.9	6.14	1.412	0.498	21	37.6	1.347	0.43	21	34	0.464145	35.8	0.959	-0.06	21	28.8	1.052	0.073	21	15.5	0.00791308	22.15	1.124	0.169	21	26.6	1.298	0.376	21	21.9	0.276199	24.25	3	FALSE	FALSE	TRUE	FALSE	0.944	-0.083	21
P28288	ATP-binding cassette sub-family D member 3 OS=Homo sapiens GN=ABCD3 PE=1 SV=1 - [ABCD3_HUMAN]	ABCD3	270.75	19.73	3	12	13	18	659	75.4	9.36	1.101	0.139	17	14.8	1.07	0.098	17	22.9	0.11836	18.85	0.953	-0.069	17	17.8	0.891	-0.167	17	15.1	-0.117161	16.45	1.132	0.179	17	11	0.97	-0.044	17	15	0.0717627	13	0	FALSE	FALSE	TRUE	FALSE	1.057	0.08	17
P56589	Peroxisomal biogenesis factor 3 OS=Homo sapiens GN=PEX3 PE=1 SV=1 - [PEX3_HUMAN]	PEX3	116.25	9.38	1	2	2	3	373	42.1	8.15	0.958	-0.062	3	0.6	0.9	-0.152	3	0.9	-0.106249	0.75	1.02	0.029	3	1.1	0.993	-0.01	3	3.7	0.00934717	2.4	0.962	-0.056	3	1.7	0.867	-0.206	3	4.7	-0.128945	3.2	0	FALSE	FALSE	TRUE	FALSE	1.105	0.144	3
P40855	Peroxisomal biogenesis factor 19 OS=Homo sapiens GN=PEX19 PE=1 SV=1 - [PEX19_HUMAN]	PEX19	868.67	47.83	1	11	11	28	299	32.8	4.34	0.832	-0.265	28	19.5	0.85	-0.234	28	19	-0.249822	19.25	0.93	-0.105	28	9.8	0.999	-0.001	28	11.3	-0.0521469	10.55	0.793	-0.335	28	24.7	0.866	-0.208	28	22.4	-0.269686	23.55	0	FALSE	FALSE	TRUE	FALSE	0.992	-0.012	28
Q9UBJ2	ATP-binding cassette sub-family D member 2 OS=Homo sapiens GN=ABCD2 PE=1 SV=1 - [ABCD2_HUMAN]	ABCD2	0	0.81	1	1	1	1	740	83.2	8.92	0.979	-0.031	1	NA	1.469	0.555	1	NA	0.291604	NA	1.193	0.255	1	NA	0.855	-0.226	1	NA	0.0342157	NA	1.158	0.212	1	NA	1.25	0.322	1	NA	0.267835	NA		FALSE	FALSE	FALSE		0.989	-0.016	1
Q9NUT2	ATP-binding cassette sub-family B member 8, mitochondrial OS=Homo sapiens GN=ABCB8 PE=1 SV=3 - [ABCB8_HUMAN]	ABCB8	33	1.09	1	1	1	1	735	79.9	8.98	1.235	0.305	1	NA	1.186	0.246	1	NA	0.275603	NA	1.297	0.375	1	NA	1.02	0.029	1	NA	0.212258	NA	1.588	0.667	1	NA	1.204	0.268	1	NA	0.481299	NA		FALSE	FALSE	FALSE		1.187	0.247	1
Q5T3U5	Multidrug resistance-associated protein 7 OS=Homo sapiens GN=ABCC10 PE=1 SV=1 - [MRP7_HUMAN]	ABCC10	39.09	0.94	1	1	1	1	1492	161.5	7.08	1.025	0.036	1	NA	1.143	0.193	1	NA	0.116365	NA	1.266	0.34	1	NA	1.235	0.305	1	NA	0.322505	NA	1.287	0.364	1	NA	1.404	0.49	1	NA	0.428142	NA		FALSE	FALSE	FALSE		0.94	-0.089	1
Q8NE71	ATP-binding cassette sub-family F member 1 OS=Homo sapiens GN=ABCF1 PE=1 SV=2 - [ABCF1_HUMAN]	ABCF1	1205.32	35.27	2	23	24	54	845	95.9	6.8	0.963	-0.054	53	28.2	0.943	-0.085	53	23	-0.0694519	25.6	1.036	0.051	53	15.4	0.957	-0.063	53	23.4	-0.00505829	19.4	0.988	-0.017	53	24	0.936	-0.095	53	24.1	-0.0558912	24.05	0	FALSE	FALSE	TRUE	FALSE	1.048	0.068	53
P29966	Myristoylated alanine-rich C-kinase substrate OS=Homo sapiens GN=MARCKS PE=1 SV=4 - [MARCS_HUMAN]	MARCKS	3639.41	51.81	1	13	13	98	332	31.5	4.45	1.545	0.628	97	34.9	1.588	0.667	97	39.6	0.647545	37.25	0.953	-0.069	97	22.9	0.896	-0.158	97	28.3	-0.113255	25.6	1.369	0.453	97	19.3	1.259	0.332	97	25.8	0.393965	22.55	3	FALSE	FALSE	TRUE	FALSE	0.963	-0.054	97
P31751	RAC-beta serine/threonine-protein kinase OS=Homo sapiens GN=AKT2 PE=1 SV=2 - [AKT2_HUMAN]	AKT2	323.41	21.83	1	7	9	13	481	55.7	6.37	1.123	0.167	9	24.4	1.153	0.205	9	24.2	0.186501	24.3	1.004	0.006	9	12.3	0.981	-0.028	9	13.8	-0.010861	13.05	1.131	0.178	9	16.8	1.11	0.151	9	15.6	0.164143	16.2	0	FALSE	FALSE	TRUE	FALSE	0.937	-0.094	9
P04637	Cellular tumor antigen p53 OS=Homo sapiens GN=TP53 PE=1 SV=4 - [P53_HUMAN]	TP53	56.89	11.7	1	4	4	4	393	43.6	6.79	1.086	0.119	4	22.4	1.191	0.252	4	26.8	0.187134	24.6	0.747	-0.421	4	27.6	0.582	-0.781	4	8	-0.589659	17.8	0.668	-0.582	4	47.8	0.662	-0.595	4	21.1	-0.588574	34.45	5	FALSE	FALSE	TRUE	FALSE	0.999	-0.001	4
P31749	RAC-alpha serine/threonine-protein kinase OS=Homo sapiens GN=AKT1 PE=1 SV=2 - [AKT1_HUMAN]	AKT1	371.6	35.21	1	11	13	19	480	55.7	6.07	1.154	0.207	15	30.2	1.205	0.269	15	36	0.238175	33.1	1.221	0.288	15	20.5	1.186	0.246	15	20.8	0.267236	20.65	1.361	0.445	15	26.2	1.423	0.509	15	11.7	0.477159	18.95	1	FALSE	FALSE	TRUE	FALSE	0.987	-0.019	15
P10412	Histone H1.4 OS=Homo sapiens GN=HIST1H1E PE=1 SV=2 - [H14_HUMAN]	HIST1H1E	3325.52	47.49	2	3	17	135	219	21.9	11.03	0.967	-0.048	13	14.2	1.266	0.34	13	48.6	0.158983	31.4	1.407	0.493	13	16.5	1.08	0.111	13	28.3	0.314407	22.4	1.25	0.322	13	26.7	1.103	0.141	13	49	0.234501	37.85	1	FALSE	FALSE	TRUE	FALSE	1.044	0.062	13
P16402	Histone H1.3 OS=Homo sapiens GN=HIST1H1D PE=1 SV=2 - [H13_HUMAN]	HIST1H1D	3163.26	40.27	2	3	16	128	221	22.3	11.02	0.977	-0.034	12	21.4	1.414	0.5	12	26.5	0.257614	23.95	1.688	0.755	12	11.2	1.057	0.08	12	11.7	0.456806	11.45	1.667	0.737	12	33.2	1.459	0.545	12	24.9	0.644318	29.05		FALSE	FALSE	TRUE	TRUE	0.976	-0.035	12
Q02539	Histone H1.1 OS=Homo sapiens GN=HIST1H1A PE=1 SV=3 - [H11_HUMAN]	HIST1H1A	1169.27	22.33	2	1	5	58	215	21.8	10.99	1.175	0.233	1	NA	1.808	0.854	1	NA	0.576764	NA	1.711	0.775	1	NA	1.103	0.141	1	NA	0.492622	NA	1.993	0.995	1	NA	1.985	0.989	1	NA	0.992043	NA		FALSE	FALSE	FALSE		0.96	-0.059	1
P16401	Histone H1.5 OS=Homo sapiens GN=HIST1H1B PE=1 SV=3 - [H15_HUMAN]	HIST1H1B	2726.91	50	1	10	15	120	226	22.6	10.92	0.912	-0.133	80	38.6	1.215	0.281	80	68.7	0.08882	53.65	1.405	0.491	80	36	0.998	-0.003	80	39.2	0.264837	37.6	1.249	0.321	80	23.4	1.161	0.215	80	30	0.269033	26.7		FALSE	FALSE	TRUE	TRUE	1.028	0.04	80
P07305	Histone H1.0 OS=Homo sapiens GN=H1F0 PE=1 SV=3 - [H10_HUMAN]	H1F0	317.47	30.41	1	8	8	22	194	20.9	10.84	1.503	0.588	22	50.5	1.679	0.748	22	50.6	0.669934	50.55	2.146	1.102	22	21.8	1.402	0.487	22	22.5	0.827006	22.15	2.927	1.549	22	47.8	2.301	1.202	22	46.4	1.38626	47.1	2	FALSE	FALSE	TRUE	FALSE	1.121	0.165	22
P16403	Histone H1.2 OS=Homo sapiens GN=HIST1H1C PE=1 SV=2 - [H12_HUMAN]	HIST1H1C	3258.54	48.83	2	5	18	135	213	21.4	10.93	0.964	-0.053	25	25.6	1.402	0.487	25	36.9	0.24245	31.25	1.409	0.495	25	17.5	1.016	0.023	25	34.2	0.277985	25.85	1.377	0.462	25	30.7	1.247	0.318	25	35.1	0.391768	32.9		FALSE	FALSE	TRUE	TRUE	1.004	0.006	25
Q96IF1	LIM domain-containing protein ajuba OS=Homo sapiens GN=AJUBA PE=1 SV=1 - [AJUBA_HUMAN]	AJUBA	101.81	7.62	1	3	3	6	538	56.9	7.14	0.814	-0.297	6	18.7	0.704	-0.506	6	19.4	-0.397828	19.05	0.743	-0.429	6	15.8	0.826	-0.276	6	7.9	-0.350155	11.85	0.629	-0.669	6	39.2	0.6	-0.737	6	69.5	-0.702515	54.35	5	FALSE	FALSE	TRUE	FALSE	1.028	0.04	6
Q9ULM6	CCR4-NOT transcription complex subunit 6 OS=Homo sapiens GN=CNOT6 PE=1 SV=2 - [CNOT6_HUMAN]	CNOT6	54.23	3.95	1	1	2	2	557	63.3	7.27	1.375	0.459	1	NA	1.309	0.388	1	NA	0.424385	NA	0.772	-0.373	1	NA	0.707	-0.5	1	NA	-0.435378	NA	1.052	0.073	1	NA	0.92	-0.12	1	NA	-0.0203404	NA		FALSE	FALSE	FALSE		0.938	-0.092	1
Q92600	Cell differentiation protein RCD1 homolog OS=Homo sapiens GN=RQCD1 PE=1 SV=1 - [RCD1_HUMAN]	RQCD1	271.01	25.75	1	5	5	10	299	33.6	8.03	0.762	-0.392	10	19.2	0.834	-0.262	10	17.4	-0.325539	18.3	1.131	0.178	10	17.9	1.108	0.148	10	16.3	0.162855	17.1	0.945	-0.082	10	18	0.912	-0.133	10	7.6	-0.107026	12.8	4	FALSE	FALSE	TRUE	FALSE	0.983	-0.025	10
P35227	Polycomb group RING finger protein 2 OS=Homo sapiens GN=PCGF2 PE=1 SV=1 - [PCGF2_HUMAN]	PCGF2	59.04	9.3	1	2	3	3	344	37.8	7.96	1.001	0.001	2	24.5	0.935	-0.097	2	31.5	-0.046921	28	1.163	0.218	2	27.1	1.257	0.33	2	41.5	0.275007	34.3	1.153	0.205	2	2.5	1.169	0.225	2	9.1	0.215368	5.8		FALSE	FALSE	FALSE		1.035	0.05	2
Q8NEZ4	Histone-lysine N-methyltransferase 2C OS=Homo sapiens GN=KMT2C PE=1 SV=3 - [KMT2C_HUMAN]	KMT2C	48.39	0.18	1	1	1	3	4911	541	6.49	1.386	0.471	3	2.9	1.389	0.474	3	0.3	0.472488	1.6	0.875	-0.193	3	5.1	0.72	-0.474	3	1.5	-0.326444	3.3	1.179	0.238	3	2.2	0.996	-0.006	3	1.2	0.121015	1.7	6	FALSE	FALSE	TRUE	FALSE	1.081	0.112	3
P61964	WD repeat-containing protein 5 OS=Homo sapiens GN=WDR5 PE=1 SV=1 - [WDR5_HUMAN]	WDR5	571.34	28.44	1	7	7	18	334	36.6	8.27	0.922	-0.117	18	20.1	0.905	-0.144	18	14.3	-0.130523	17.2	1.002	0.003	18	11.8	0.961	-0.057	18	13.2	-0.0269398	12.5	0.86	-0.218	18	8.5	0.871	-0.199	18	10.7	-0.208394	9.6	0	FALSE	FALSE	TRUE	FALSE	0.991	-0.013	18
P50281	Matrix metalloproteinase-14 OS=Homo sapiens GN=MMP14 PE=1 SV=3 - [MMP14_HUMAN]	MMP14	221.79	7.04	1	3	3	8	582	65.9	7.77	1.089	0.123	8	29.8	1.179	0.238	8	15.6	0.181421	22.7	1.173	0.23	8	11	1.239	0.309	8	15.5	0.27023	13.25	1.202	0.265	8	31.6	1.343	0.425	8	37.6	0.347666	34.6	1	FALSE	FALSE	TRUE	FALSE	1.037	0.052	8
P51511	Matrix metalloproteinase-15 OS=Homo sapiens GN=MMP15 PE=1 SV=1 - [MMP15_HUMAN]	MMP15	171.99	6.58	1	3	3	4	669	75.8	7.46	1.213	0.279	4	18.4	1.298	0.376	4	19.2	0.328262	18.8	1.158	0.212	4	3.1	1.031	0.044	4	1.5	0.130272	2.3	1.429	0.515	4	13.8	1.423	0.509	4	10.1	0.511974	11.95	3	FALSE	FALSE	TRUE	FALSE	1.026	0.037	4
P07477	Trypsin-1 OS=Homo sapiens GN=PRSS1 PE=1 SV=1 - [TRY1_HUMAN]	PRSS1	452.73	7.29	2	2	2	58	247	26.5	6.51	1.554	0.636	37	30.5	0.899	-0.154	37	17.4	0.294547	23.95	1.128	0.174	37	17	0.976	-0.035	37	27.7	0.0731347	22.35	1.842	0.881	37	32.6	0.879	-0.186	37	32	0.444137	32.3		FALSE	FALSE	TRUE	TRUE	1.541	0.624	37
P60842	Eukaryotic initiation factor 4A-I OS=Homo sapiens GN=EIF4A1 PE=1 SV=1 - [IF4A1_HUMAN]	EIF4A1	5689.88	77.83	1	21	39	238	406	46.1	5.48	1.134	0.181	115	27.1	1.191	0.252	115	35.7	0.217231	31.4	0.838	-0.255	115	25.5	0.834	-0.262	115	28.3	-0.258425	26.9	0.927	-0.109	115	21.8	0.982	-0.026	115	22.8	-0.0671829	22.3	0	FALSE	FALSE	TRUE	FALSE	0.955	-0.066	115
Q14240	Eukaryotic initiation factor 4A-II OS=Homo sapiens GN=EIF4A2 PE=1 SV=2 - [IF4A2_HUMAN]	EIF4A2	2892.5	64.86	1	9	30	145	407	46.4	5.48	1.321	0.402	17	47	1.249	0.321	17	61	0.361768	54	1.006	0.009	17	15.8	1.188	0.249	17	25	0.133564	20.4	1.476	0.562	17	52.4	1.675	0.744	17	27.7	0.65581	40.05	3	FALSE	FALSE	TRUE	FALSE	0.983	-0.025	17
Q15056	Eukaryotic translation initiation factor 4H OS=Homo sapiens GN=EIF4H PE=1 SV=5 - [IF4H_HUMAN]	EIF4H	1635.57	57.66	1	22	22	82	248	27.4	7.23	0.957	-0.063	78	31	0.935	-0.097	78	31.1	-0.0800879	31.05	0.928	-0.108	78	21.3	0.941	-0.088	78	19.1	-0.0977334	20.2	0.888	-0.171	78	26.5	0.859	-0.219	78	25.8	-0.19512	26.15	0	FALSE	FALSE	TRUE	FALSE	1.003	0.004	78
O60733	85/88 kDa calcium-independent phospholipase A2 OS=Homo sapiens GN=PLA2G6 PE=1 SV=2 - [PLPL9_HUMAN]	PLA2G6	50.4	0.99	1	1	1	1	806	89.8	7.27	1.223	0.29	1	NA	1.121	0.165	1	NA	0.228973	NA	1.163	0.218	1	NA	1.334	0.416	1	NA	0.320196	NA	1.41	0.496	1	NA	1.488	0.573	1	NA	0.535058	NA		FALSE	FALSE	FALSE		0.94	-0.089	1
Q643R3	Lysophospholipid acyltransferase LPCAT4 OS=Homo sapiens GN=LPCAT4 PE=1 SV=1 - [LPCT4_HUMAN]	LPCAT4	39.44	2.29	1	1	1	1	524	57.2	8.97	0.919	-0.122	1	NA	0.974	-0.038	1	NA	-0.0793256	NA	1.057	0.08	1	NA	0.984	-0.023	1	NA	0.0292762	NA	0.963	-0.054	1	NA	0.954	-0.068	1	NA	-0.0611497	NA		FALSE	FALSE	FALSE		0.997	-0.004	1
Q8NF37	Lysophosphatidylcholine acyltransferase 1 OS=Homo sapiens GN=LPCAT1 PE=1 SV=2 - [PCAT1_HUMAN]	LPCAT1	398.24	13.48	2	5	6	13	534	59.1	6.02	0.986	-0.02	11	33.4	1.138	0.187	11	58.9	0.0867838	46.15	1.031	0.044	11	14.1	0.978	-0.032	11	18.8	0.00647756	16.45	1.113	0.154	11	16.6	1.133	0.18	11	27.6	0.167358	22.1	0	FALSE	FALSE	TRUE	FALSE	1.027	0.038	11
Q6ZWT7	Lysophospholipid acyltransferase 2 OS=Homo sapiens GN=MBOAT2 PE=2 SV=2 - [MBOA2_HUMAN]	MBOAT2	24.96	2.31	1	1	1	1	520	59.5	8.03	0.908	-0.139	1	NA	0.993	-0.01	1	NA	-0.0732415	NA	1.171	0.228	1	NA	0.95	-0.074	1	NA	0.0847446	NA	1.054	0.076	1	NA	0.939	-0.091	1	NA	-0.00505829	NA		FALSE	FALSE	FALSE		1.161	0.215	1
Q9NP80	Calcium-independent phospholipase A2-gamma OS=Homo sapiens GN=PNPLA8 PE=1 SV=1 - [PLPL8_HUMAN]	PNPLA8	113.65	3.2	1	3	3	6	782	88.4	9.23	1.248	0.32	6	7.3	1.132	0.179	6	3.4	0.250962	5.35	1.363	0.447	6	29	1.302	0.381	6	18.9	0.414136	23.95	1.492	0.577	6	5.2	1.497	0.582	6	13.2	0.579663	9.2	1	FALSE	FALSE	TRUE	FALSE	1.08	0.111	6
Q7L5N7	Lysophosphatidylcholine acyltransferase 2 OS=Homo sapiens GN=LPCAT2 PE=1 SV=1 - [PCAT2_HUMAN]	LPCAT2	116.89	9.74	1	5	5	6	544	60.2	6.55	1.007	0.01	6	17.5	0.954	-0.068	6	14.5	-0.0284105	16	0.98	-0.029	6	5.6	0.828	-0.272	6	15.4	-0.145605	10.5	0.983	-0.025	6	12.9	0.928	-0.108	6	17.9	-0.0656722	15.4	0	FALSE	FALSE	TRUE	FALSE	1.071	0.099	6
Q9H0X9	Oxysterol-binding protein-related protein 5 OS=Homo sapiens GN=OSBPL5 PE=1 SV=1 - [OSBL5_HUMAN]	OSBPL5	87.18	5.12	1	2	4	5	879	98.6	7.47	1.335	0.417	2	11.1	1.184	0.244	2	12.4	0.332851	11.75	1.218	0.285	2	12.1	1.146	0.197	2	1.1	0.24123	6.6	1.611	0.688	2	23.4	1.35	0.433	2	11.3	0.566084	17.35		FALSE	FALSE	FALSE		1.161	0.215	2
Q9BZF1	Oxysterol-binding protein-related protein 8 OS=Homo sapiens GN=OSBPL8 PE=1 SV=3 - [OSBL8_HUMAN]	OSBPL8	556.4	25.08	1	16	18	25	889	101.1	6.96	1.027	0.038	22	16.4	1.071	0.099	22	13.1	0.0690147	14.75	1.365	0.449	22	9.3	1.335	0.417	22	20.5	0.432959	14.9	1.478	0.564	22	18.6	1.4	0.485	22	17.8	0.525067	18.2	1	FALSE	FALSE	TRUE	FALSE	1.025	0.036	22
Q9BXB5	Oxysterol-binding protein-related protein 10 OS=Homo sapiens GN=OSBPL10 PE=1 SV=2 - [OSB10_HUMAN]	OSBPL10	249.83	5.63	1	2	4	7	764	83.9	8.31	0.886	-0.175	3	1.7	1.033	0.047	3	10	-0.0596453	5.85	0.732	-0.45	3	20.7	0.36	-1.474	3	39.4	-0.873027	30.05	0.643	-0.637	3	19	0.37	-1.434	3	62.4	-0.981366	40.7		FALSE	FALSE	TRUE	TRUE	1.338	0.42	3
O43747	AP-1 complex subunit gamma-1 OS=Homo sapiens GN=AP1G1 PE=1 SV=5 - [AP1G1_HUMAN]	AP1G1	825.17	19.1	1	17	17	39	822	91.3	6.8	1.085	0.118	37	23.8	1.129	0.175	37	32.9	0.146655	28.35	0.979	-0.031	37	10.7	1.079	0.11	37	12.4	0.041243	11.55	1.061	0.085	37	12.9	1.169	0.225	37	23.9	0.157044	18.4	0	FALSE	FALSE	TRUE	FALSE	0.928	-0.108	37
P56377	AP-1 complex subunit sigma-2 OS=Homo sapiens GN=AP1S2 PE=1 SV=1 - [AP1S2_HUMAN]	AP1S2	226.1	26.75	1	3	4	6	157	18.6	5.47	1.057	0.08	5	39.8	1.135	0.183	5	14.3	0.132248	27.05	0.883	-0.18	5	18.7	0.855	-0.226	5	3	-0.202572	10.85	0.816	-0.293	5	40	1.041	0.058	5	7.7	-0.107026	23.85	0	FALSE	FALSE	TRUE	FALSE	0.964	-0.053	5
P61966	AP-1 complex subunit sigma-1A OS=Homo sapiens GN=AP1S1 PE=1 SV=1 - [AP1S1_HUMAN]	AP1S1	80.72	20.89	1	1	2	3	158	18.7	5.73	0.911	-0.134	2	47.7	0.783	-0.353	2	7	-0.239566	27.35	1.221	0.288	2	34.2	1.49	0.575	2	12.1	0.438825	23.15	1.102	0.14	2	12	1.161	0.215	2	5.1	0.178237	8.55		FALSE	FALSE	FALSE		1.134	0.181	2
Q10567	AP-1 complex subunit beta-1 OS=Homo sapiens GN=AP1B1 PE=1 SV=2 - [AP1B1_HUMAN]	AP1B1	3437.47	38.99	1	19	36	128	949	104.6	5.06	0.991	-0.013	60	18.2	1.043	0.061	60	19.2	0.0243197	18.7	1.074	0.103	60	14	1.168	0.224	60	11	0.164786	12.5	1.037	0.052	60	13	1.206	0.27	60	19.2	0.16543	16.1	0	FALSE	FALSE	TRUE	FALSE	0.949	-0.076	60
Q9UIQ6	Leucyl-cystinyl aminopeptidase OS=Homo sapiens GN=LNPEP PE=1 SV=3 - [LCAP_HUMAN]	LNPEP	150.75	3.9	1	3	3	4	1025	117.3	5.73	0.89	-0.168	4	14.3	1.011	0.016	4	23	-0.0732415	18.65	1.01	0.014	4	14.3	0.983	-0.025	4	13.9	-0.00505829	14.1	0.85	-0.234	4	16.8	0.9	-0.152	4	25.4	-0.192645	21.1	0	FALSE	FALSE	TRUE	FALSE	1.011	0.016	4
Q15836	Vesicle-associated membrane protein 3 OS=Homo sapiens GN=VAMP3 PE=1 SV=3 - [VAMP3_HUMAN]	VAMP3	253.18	58	1	5	6	11	100	11.3	8.79	0.834	-0.262	4	8.3	0.896	-0.158	4	7.2	-0.209228	7.75	0.839	-0.253	4	3.3	0.805	-0.313	4	28.7	-0.28279	16	0.607	-0.72	4	18.6	0.629	-0.669	4	4.4	-0.694321	11.5	5	FALSE	FALSE	TRUE	FALSE	0.953	-0.069	4
Q14145	Kelch-like ECH-associated protein 1 OS=Homo sapiens GN=KEAP1 PE=1 SV=2 - [KEAP1_HUMAN]	KEAP1	58.26	5.29	1	3	3	3	624	69.6	6.44	0.996	-0.006	3	20.5	0.886	-0.175	3	13.5	-0.0877334	17	0.961	-0.057	3	12.6	0.966	-0.05	3	2.7	-0.0536434	7.65	0.88	-0.184	3	3.9	0.852	-0.231	3	2	-0.207561	2.95	0	FALSE	FALSE	TRUE	FALSE	0.999	-0.001	3
O00161	Synaptosomal-associated protein 23 OS=Homo sapiens GN=SNAP23 PE=1 SV=1 - [SNP23_HUMAN]	SNAP23	379.76	63.51	1	10	10	13	211	23.3	5.01	0.915	-0.128	13	22	1.053	0.075	13	24.4	-0.0232698	23.2	0.697	-0.521	13	23.4	0.758	-0.4	13	24.4	-0.458981	23.9	0.712	-0.49	13	20.1	0.79	-0.34	13	17.8	-0.413115	18.95	5	FALSE	FALSE	TRUE	FALSE	0.924	-0.114	13
O43488	Aflatoxin B1 aldehyde reductase member 2 OS=Homo sapiens GN=AKR7A2 PE=1 SV=3 - [ARK72_HUMAN]	AKR7A2	1243.47	35.1	3	12	12	47	359	39.6	7.17	0.924	-0.114	45	18.2	0.927	-0.109	45	18	-0.111695	18.1	1.021	0.03	45	13.3	1.127	0.172	45	10.3	0.102994	11.8	0.942	-0.086	45	14.3	1.034	0.048	45	20.2	-0.0174171	17.25	0	FALSE	FALSE	TRUE	FALSE	0.964	-0.053	45
Q9BY49	Peroxisomal trans-2-enoyl-CoA reductase OS=Homo sapiens GN=PECR PE=1 SV=2 - [PECR_HUMAN]	PECR	30.83	4.29	1	1	1	1	303	32.5	8.81	1.206	0.27	1	NA	0.914	-0.13	1	NA	0.0840643	NA	0.933	-0.1	1	NA	1.121	0.165	1	NA	0.0384362	NA	1.115	0.157	1	NA	1.02	0.029	1	NA	0.0942361	NA		FALSE	FALSE	FALSE		0.992	-0.012	1
Q9UJ83	2-hydroxyacyl-CoA lyase 1 OS=Homo sapiens GN=HACL1 PE=1 SV=2 - [HACL1_HUMAN]	HACL1	74.7	8.65	1	4	4	4	578	63.7	7.36	0.781	-0.357	4	0.9	0.862	-0.214	4	12.7	-0.283668	6.8	1.01	0.014	4	19.5	0.884	-0.178	4	15.5	-0.0785637	17.5	0.812	-0.3	4	15.7	0.749	-0.417	4	5.8	-0.357529	10.75	4	FALSE	FALSE	TRUE	FALSE	1.01	0.014	4
O14832	Phytanoyl-CoA dioxygenase, peroxisomal OS=Homo sapiens GN=PHYH PE=1 SV=1 - [PAHX_HUMAN]	PHYH	130.59	7.99	1	3	3	6	338	38.5	8.47	1.242	0.313	6	8.3	1.321	0.402	6	10.5	0.357833	9.4	0.723	-0.468	6	17.6	0.703	-0.508	6	11.5	-0.488026	14.55	0.89	-0.168	6	9.2	0.925	-0.112	6	16.5	-0.14003	12.85	6	FALSE	FALSE	TRUE	FALSE	0.976	-0.035	6
P02743	Serum amyloid P-component OS=Homo sapiens GN=APCS PE=1 SV=2 - [SAMP_HUMAN]	APCS	22.79	2.69	1	1	1	1	223	25.4	6.54	0.661	-0.597	1	NA	0.528	-0.921	1	NA	-0.750251	NA	0.564	-0.826	1	NA	0.837	-0.257	1	NA	-0.513543	NA	0.369	-1.438	1	NA	0.44	-1.184	1	NA	-1.30579	NA		FALSE	FALSE	FALSE		0.798	-0.326	1
P37840	Alpha-synuclein OS=Homo sapiens GN=SNCA PE=1 SV=1 - [SYUA_HUMAN]	SNCA	871.65	66.43	2	11	12	31	140	14.5	4.7	1.253	0.325	25	30.2	1.092	0.127	25	36.1	0.229588	33.15	2.006	1.004	25	29.3	2.188	1.13	25	40.3	1.06833	34.8	2.372	1.246	25	26.1	2.264	1.179	25	27.3	1.21288	26.7	2	FALSE	FALSE	TRUE	FALSE	1.119	0.162	25
Q9Y287	Integral membrane protein 2B OS=Homo sapiens GN=ITM2B PE=1 SV=1 - [ITM2B_HUMAN]	ITM2B	154.45	17.29	1	3	3	5	266	30.3	5.14	1.246	0.317	5	43	1.367	0.451	5	58.7	0.385707	50.85	1	0	5	32.5	0.706	-0.502	5	34.1	-0.229382	33.3	1.16	0.214	5	9.2	1.165	0.22	5	18.8	0.217231	14	3	FALSE	FALSE	TRUE	FALSE	0.973	-0.039	5
P56817	Beta-secretase 1 OS=Homo sapiens GN=BACE1 PE=1 SV=2 - [BACE1_HUMAN]	BACE1	21.33	1.4	1	1	1	1	501	55.7	5.43	1.079	0.11	1	NA	0.833	-0.264	1	NA	-0.0649175	NA	1.132	0.179	1	NA	1.125	0.17	1	NA	0.174406	NA	1.21	0.275	1	NA	0.932	-0.102	1	NA	0.0989585	NA		FALSE	FALSE	FALSE		1.156	0.209	1
P05937	Calbindin OS=Homo sapiens GN=CALB1 PE=1 SV=2 - [CALB1_HUMAN]	CALB1	850.51	38.31	1	10	11	30	261	30	4.83	0.675	-0.567	28	35.7	0.68	-0.556	28	34.7	-0.561707	35.2	0.605	-0.725	28	32.3	0.66	-0.599	28	32.2	-0.660863	32.25	0.463	-1.111	28	60.7	0.529	-0.919	28	47	-1.01159	53.85	5	FALSE	FALSE	TRUE	FALSE	0.951	-0.072	28
Q9UPN4	Centrosomal protein of 131 kDa OS=Homo sapiens GN=CEP131 PE=1 SV=3 - [CP131_HUMAN]	CEP131	245.79	11.54	1	11	11	13	1083	122.1	8.69	0.948	-0.077	13	32.4	0.839	-0.253	13	19.8	-0.16246	26.1	0.808	-0.308	13	19.5	0.751	-0.413	13	19.2	-0.359379	19.35	0.73	-0.454	13	34.2	0.708	-0.498	13	24.2	-0.475936	29.2	5	FALSE	FALSE	TRUE	FALSE	1.012	0.017	13
Q66GS9	Centrosomal protein of 135 kDa OS=Homo sapiens GN=CEP135 PE=1 SV=2 - [CP135_HUMAN]	CEP135	71.63	8.07	1	7	7	7	1140	133.4	6.21	1.09	0.124	7	30.1	1.176	0.234	7	20.3	0.180148	25.2	0.876	-0.191	7	13.4	0.887	-0.173	7	15.7	-0.181968	14.55	1.013	0.019	7	16.2	0.966	-0.05	7	6.8	-0.0152284	11.5	0	FALSE	FALSE	TRUE	FALSE	1.003	0.004	7
Q86SQ7	Serologically defined colon cancer antigen 8 OS=Homo sapiens GN=SDCCAG8 PE=1 SV=1 - [SDCG8_HUMAN]	SDCCAG8	74.85	2.38	1	1	1	1	713	82.6	5.81	0.952	-0.071	1	NA	0.821	-0.285	1	NA	-0.173807	NA	1.189	0.25	1	NA	1.268	0.343	1	NA	0.296898	NA	1.123	0.167	1	NA	1.036	0.051	1	NA	0.110363	NA		FALSE	FALSE	FALSE		1.101	0.139	1
Q5JTW2	Centrosomal protein of 78 kDa OS=Homo sapiens GN=CEP78 PE=1 SV=1 - [CEP78_HUMAN]	CEP78	170.93	5.08	1	4	4	9	689	76.3	8.18	0.992	-0.012	9	14.5	0.934	-0.099	9	21.8	-0.0543923	18.15	0.883	-0.18	9	12.2	0.782	-0.355	9	18	-0.264478	15.1	0.824	-0.279	9	21.2	0.745	-0.425	9	22.1	-0.350155	21.65	5	FALSE	FALSE	TRUE	FALSE	1.066	0.092	9
Q9BYV8	Centrosomal protein of 41 kDa OS=Homo sapiens GN=CEP41 PE=1 SV=1 - [CEP41_HUMAN]	CEP41	550.65	20.64	1	6	6	16	373	41.3	8.32	0.874	-0.194	16	30.4	0.847	-0.24	16	23.7	-0.216753	27.05	1.069	0.096	16	15.1	1.187	0.247	16	16.2	0.173767	15.65	1.051	0.072	16	23	1.039	0.055	16	19.7	0.0635029	21.35	0	FALSE	FALSE	TRUE	FALSE	1.029	0.041	16
Q8TAP6	Centrosomal protein of 76 kDa OS=Homo sapiens GN=CEP76 PE=1 SV=1 - [CEP76_HUMAN]	CEP76	42.02	2.58	1	1	1	1	659	74.4	6.74	1.01	0.014	1	NA	1.022	0.031	1	NA	0.0229004	NA	0.979	-0.031	1	NA	0.989	-0.016	1	NA	-0.0232698	NA	0.98	-0.029	1	NA	1.006	0.009	1	NA	-0.0101344	NA		FALSE	FALSE	FALSE		0.972	-0.041	1
Q9BV73	Centrosome-associated protein CEP250 OS=Homo sapiens GN=CEP250 PE=1 SV=2 - [CP250_HUMAN]	CEP250	777.3	12.98	1	24	24	31	2442	281	5.02	0.917	-0.125	31	24	0.864	-0.211	31	20.1	-0.167312	22.05	1.074	0.103	31	16.4	1.066	0.092	31	15.6	0.0976108	16	1.006	0.009	31	22.9	0.961	-0.057	31	19.7	-0.024003	21.3	0	FALSE	FALSE	TRUE	FALSE	1.041	0.058	31
O95613	Pericentrin OS=Homo sapiens GN=PCNT PE=1 SV=4 - [PCNT_HUMAN]	PCNT	83.86	2.22	1	7	7	7	3336	377.8	5.55	0.929	-0.106	7	9.1	0.903	-0.147	7	7.1	-0.12658	8.1	1.079	0.11	7	17	1.13	0.176	7	5.7	0.143393	11.35	0.929	-0.106	7	12.9	0.877	-0.189	7	8.9	-0.147202	10.9	0	FALSE	FALSE	TRUE	FALSE	0.993	-0.01	7
Q9P209	Centrosomal protein of 72 kDa OS=Homo sapiens GN=CEP72 PE=1 SV=2 - [CEP72_HUMAN]	CEP72	53.57	1.55	1	1	1	2	647	71.7	6.52	1.167	0.223	2	3.2	0.893	-0.163	2	1	0.0426443	2.1	1.018	0.026	2	3.5	0.921	-0.119	2	11.6	-0.0446872	7.55	1.177	0.235	2	0.3	0.818	-0.29	2	10.6	-0.00361125	5.45		FALSE	FALSE	FALSE		1.258	0.331	2
Q9NVX0	HAUS augmin-like complex subunit 2 OS=Homo sapiens GN=HAUS2 PE=1 SV=1 - [HAUS2_HUMAN]	HAUS2	71.07	24.26	1	5	5	6	235	26.9	7.88	0.858	-0.221	6	22.7	0.783	-0.353	6	28.5	-0.285425	25.6	0.853	-0.229	6	19.3	0.947	-0.079	6	24.4	-0.152003	21.85	0.759	-0.398	6	20.5	0.835	-0.26	6	2.9	-0.327348	11.7	4	FALSE	FALSE	TRUE	FALSE	0.956	-0.065	6
Q7Z4H7	HAUS augmin-like complex subunit 6 OS=Homo sapiens GN=HAUS6 PE=1 SV=2 - [HAUS6_HUMAN]	HAUS6	675.82	25.65	1	17	17	23	955	108.6	6.47	1.017	0.024	23	33.1	1.001	0.001	23	31.2	0.0129262	32.15	0.782	-0.355	23	12.7	0.843	-0.246	23	17.8	-0.29956	15.25	0.843	-0.246	23	18.2	0.856	-0.224	23	13.2	-0.235314	15.7	0	FALSE	FALSE	TRUE	FALSE	0.977	-0.034	23
Q9H6D7	HAUS augmin-like complex subunit 4 OS=Homo sapiens GN=HAUS4 PE=1 SV=1 - [HAUS4_HUMAN]	HAUS4	322.97	27	1	8	8	13	363	42.4	5.68	0.983	-0.025	13	14.5	1.067	0.094	13	23.7	0.0356239	19.1	0.774	-0.37	13	10.8	0.774	-0.37	13	19.4	-0.369595	15.1	0.711	-0.492	13	13.3	0.804	-0.315	13	14.8	-0.400682	14.05	5	FALSE	FALSE	TRUE	FALSE	0.887	-0.173	13
O94927	HAUS augmin-like complex subunit 5 OS=Homo sapiens GN=HAUS5 PE=1 SV=2 - [HAUS5_HUMAN]	HAUS5	149.06	10.27	1	4	5	8	633	71.6	8.51	1.074	0.103	6	11.2	0.974	-0.038	6	31.7	0.0342157	21.45	0.88	-0.184	6	6	0.905	-0.144	6	18.2	-0.164076	12.1	0.97	-0.044	6	11.2	0.936	-0.095	6	10.1	-0.0694519	10.65	0	FALSE	FALSE	TRUE	FALSE	0.981	-0.028	6
Q99871	HAUS augmin-like complex subunit 7 OS=Homo sapiens GN=HAUS7 PE=1 SV=3 - [HAUS7_HUMAN]	HAUS7	196.6	32.88	1	8	9	13	368	40.8	4.83	0.982	-0.026	12	21.2	0.853	-0.229	12	21.2	-0.12422	21.2	0.838	-0.255	12	15.8	0.835	-0.26	12	8.2	-0.257563	12	0.797	-0.327	12	25.5	0.715	-0.484	12	10.5	-0.403542	18	5	FALSE	FALSE	TRUE	FALSE	1.018	0.026	12
Q68CZ6	HAUS augmin-like complex subunit 3 OS=Homo sapiens GN=HAUS3 PE=1 SV=1 - [HAUS3_HUMAN]	HAUS3	397.23	25.37	1	11	12	16	603	69.6	5.55	0.943	-0.085	15	26.1	0.91	-0.136	15	28.6	-0.110137	27.35	0.818	-0.29	15	19.6	0.892	-0.165	15	24.6	-0.226004	22.1	0.794	-0.333	15	22.2	0.845	-0.243	15	12.2	-0.287184	17.2	0	FALSE	FALSE	TRUE	FALSE	0.96	-0.059	15
O43805	Sjoegren syndrome nuclear autoantigen 1 OS=Homo sapiens GN=SSNA1 PE=1 SV=2 - [SSNA1_HUMAN]	SSNA1	256.53	48.74	1	5	5	9	119	13.6	5.38	1.113	0.154	9	35.4	0.924	-0.114	9	36.3	0.026446	35.85	0.853	-0.229	9	14.9	0.97	-0.044	9	9.3	-0.133685	12.1	0.903	-0.147	9	12	0.87	-0.201	9	28.2	-0.173807	20.1	0	FALSE	FALSE	TRUE	FALSE	0.981	-0.028	9
Q86XR8	Centrosomal protein of 57 kDa OS=Homo sapiens GN=CEP57 PE=1 SV=2 - [CEP57_HUMAN]	CEP57	28.64	2.4	1	1	1	1	500	57.1	9.31	0.869	-0.203	1	NA	0.966	-0.05	1	NA	-0.12422	NA	1.267	0.341	1	NA	1.109	0.149	1	NA	0.248535	NA	1.091	0.126	1	NA	1.066	0.092	1	NA	0.109026	NA		FALSE	FALSE	FALSE		0.972	-0.041	1
Q8TEP8	Centrosomal protein of 192 kDa OS=Homo sapiens GN=CEP192 PE=1 SV=2 - [CE192_HUMAN]	CEP192	62.19	1.91	1	3	3	3	1941	213	6.51	0.928	-0.108	3	25	0.854	-0.228	3	39.3	-0.166503	32.15	1.045	0.064	3	3.3	0.814	-0.297	3	1.1	-0.105473	2.2	0.922	-0.117	3	31.5	0.713	-0.488	3	5.7	-0.290709	18.6	0	FALSE	FALSE	TRUE	FALSE	0.979	-0.031	3
P23258	Tubulin gamma-1 chain OS=Homo sapiens GN=TUBG1 PE=1 SV=2 - [TBG1_HUMAN]	TUBG1	265.02	28.16	2	8	8	12	451	51.1	6.14	1.063	0.088	12	20.6	1.172	0.229	12	25.6	0.160275	23.1	0.866	-0.208	12	14.8	0.843	-0.246	12	7.5	-0.226848	11.15	0.89	-0.168	12	15.6	0.965	-0.051	12	22.4	-0.108581	19	0	FALSE	FALSE	TRUE	FALSE	0.967	-0.048	12
Q15154	Pericentriolar material 1 protein OS=Homo sapiens GN=PCM1 PE=1 SV=4 - [PCM1_HUMAN]	PCM1	1092.22	22.48	1	39	40	57	2024	228.4	5.02	0.975	-0.037	53	22.7	0.913	-0.131	53	19.4	-0.0831412	21.05	0.759	-0.398	53	19.4	0.742	-0.431	53	26.7	-0.414076	23.05	0.722	-0.47	53	30	0.68	-0.556	53	22.7	-0.512514	26.35	5	FALSE	FALSE	TRUE	FALSE	0.982	-0.026	53
O94986	Centrosomal protein of 152 kDa OS=Homo sapiens GN=CEP152 PE=1 SV=4 - [CE152_HUMAN]	CEP152	31.12	0.53	1	1	1	1	1710	195.5	5.6	0.941	-0.088	1	NA	0.973	-0.039	1	NA	-0.0634092	NA	1.078	0.108	1	NA	1.086	0.119	1	NA	0.1137	NA	1.006	0.009	1	NA	1.051	0.072	1	NA	0.0405418	NA		FALSE	FALSE	FALSE		1.052	0.073	1
Q8NHV4	Protein NEDD1 OS=Homo sapiens GN=NEDD1 PE=1 SV=1 - [NEDD1_HUMAN]	NEDD1	938.82	27.12	1	13	13	22	660	71.9	7.97	0.873	-0.196	22	22.7	0.841	-0.25	22	30.8	-0.222633	26.75	0.855	-0.226	22	21.3	0.861	-0.216	22	29.9	-0.22095	25.6	0.743	-0.429	22	22.5	0.788	-0.344	22	23	-0.385526	22.75	5	FALSE	FALSE	TRUE	FALSE	1.004	0.006	22
Q96SN8	CDK5 regulatory subunit-associated protein 2 OS=Homo sapiens GN=CDK5RAP2 PE=1 SV=5 - [CK5P2_HUMAN]	CDK5RAP2	220.38	7.87	1	12	13	13	1893	214.9	5.58	0.833	-0.264	12	11.5	0.764	-0.388	12	13.3	-0.324636	12.4	0.888	-0.171	12	13.3	0.933	-0.1	12	17.8	-0.135269	15.55	0.691	-0.533	12	25	0.651	-0.619	12	29.5	-0.575615	27.25	5	FALSE	FALSE	TRUE	FALSE	0.993	-0.01	12
Q8TCU4	Alstrom syndrome protein 1 OS=Homo sapiens GN=ALMS1 PE=1 SV=3 - [ALMS1_HUMAN]	ALMS1	89.66	1.37	1	5	6	7	4167	460.7	6.28	0.982	-0.026	5	10.6	0.903	-0.147	5	14.8	-0.0854355	12.7	0.978	-0.032	5	4.8	0.99	-0.014	5	6.9	-0.0232698	5.85	0.951	-0.072	5	17.5	0.95	-0.074	5	18.4	-0.0732415	17.95	0	FALSE	FALSE	TRUE	FALSE	0.989	-0.016	5
Q96MT8	Centrosomal protein of 63 kDa OS=Homo sapiens GN=CEP63 PE=1 SV=1 - [CEP63_HUMAN]	CEP63	38.58	1.56	1	1	1	1	703	81.3	6.13	NA	NA	NA	NA	NA	NA	NA	NA	NA	NA	NA	NA	NA	NA	NA	NA	NA	NA	NA	NA	NA	NA	NA	NA	NA	NA	NA	NA	NA	NA		TRUE	FALSE			NA	NA	NA
Q96CS2	HAUS augmin-like complex subunit 1 OS=Homo sapiens GN=HAUS1 PE=1 SV=1 - [HAUS1_HUMAN]	HAUS1	451.58	55.76	1	12	12	17	278	31.8	5.53	0.885	-0.176	17	20.9	0.901	-0.15	17	27.1	-0.163268	24	0.828	-0.272	17	21.5	1.001	0.001	17	26.3	-0.128945	23.9	0.747	-0.421	17	25.7	0.799	-0.324	17	23.1	-0.37146	24.4	5	FALSE	FALSE	TRUE	FALSE	0.99	-0.014	17
Q9BT25	HAUS augmin-like complex subunit 8 OS=Homo sapiens GN=HAUS8 PE=1 SV=3 - [HAUS8_HUMAN]	HAUS8	226.79	28.05	1	8	8	9	410	44.8	7.06	1.113	0.154	9	17.4	0.958	-0.062	9	5.4	0.0503276	11.4	0.75	-0.415	9	12	0.732	-0.45	9	24.2	-0.432455	18.1	0.821	-0.285	9	21.4	0.689	-0.537	9	29.8	-0.405451	25.6	5	FALSE	FALSE	TRUE	FALSE	1.127	0.172	9
Q5BJF6	Outer dense fiber protein 2 OS=Homo sapiens GN=ODF2 PE=1 SV=1 - [ODFP2_HUMAN]	ODF2	134.45	8.69	1	6	6	6	829	95.3	7.62	1.123	0.167	6	6.9	0.965	-0.051	6	8.4	0.0621217	7.65	0.967	-0.048	6	8.9	0.934	-0.099	6	11.8	-0.0732415	10.35	0.971	-0.042	6	20.2	0.883	-0.18	6	9.2	-0.109359	14.7	0	FALSE	FALSE	TRUE	FALSE	1.047	0.066	6
Q96QF0	Rab-3A-interacting protein OS=Homo sapiens GN=RAB3IP PE=1 SV=1 - [RAB3I_HUMAN]	RAB3IP	107.74	10.29	1	3	3	4	476	53	5.97	1.141	0.19	4	6	0.977	-0.034	4	26.8	0.0827026	16.4	1.007	0.01	4	16.9	1.06	0.084	4	13.4	0.0475384	15.15	1.06	0.084	4	5.3	1.044	0.062	4	9.1	0.0731347	7.2	0	FALSE	FALSE	TRUE	FALSE	0.997	-0.004	4
Q9NZ08	Endoplasmic reticulum aminopeptidase 1 OS=Homo sapiens GN=ERAP1 PE=1 SV=3 - [ERAP1_HUMAN]	ERAP1	309.82	18.38	1	13	13	18	941	107.2	6.46	0.999	-0.001	18	15.3	1.2	0.263	18	18.5	0.136848	16.9	0.977	-0.034	18	12.1	0.845	-0.243	18	10.1	-0.134477	11.1	0.976	-0.035	18	16.4	0.974	-0.038	18	14.5	-0.0365259	15.45	0	FALSE	FALSE	TRUE	FALSE	0.951	-0.072	18
P51572	B-cell receptor-associated protein 31 OS=Homo sapiens GN=BCAP31 PE=1 SV=3 - [BAP31_HUMAN]	BCAP31	443.04	38.62	1	16	16	28	246	28	8.44	0.875	-0.193	28	18	0.961	-0.057	28	18.4	-0.123434	18.2	1.132	0.179	28	14.8	0.925	-0.112	28	21.2	0.0405418	18	0.961	-0.057	28	19.4	0.941	-0.088	28	23.8	-0.0724828	21.6	0	FALSE	FALSE	TRUE	FALSE	1.053	0.075	28
Q03518	Antigen peptide transporter 1 OS=Homo sapiens GN=TAP1 PE=1 SV=2 - [TAP1_HUMAN]	TAP1	66.81	4.46	1	2	2	2	808	87.2	8.02	1.231	0.3	2	17.9	1.384	0.469	2	12.3	0.386811	15.1	1.076	0.106	2	13.1	0.974	-0.038	2	15.2	0.0356239	14.15	1.313	0.393	2	4.7	1.341	0.423	2	2.9	0.408168	3.8		FALSE	FALSE	FALSE		1.067	0.094	2
O15533	Tapasin OS=Homo sapiens GN=TAPBP PE=1 SV=1 - [TPSN_HUMAN]	TAPBP	83.8	4.24	1	2	2	5	448	47.6	7.15	1.102	0.14	5	9.7	1.27	0.345	5	36.6	0.246104	23.15	1.128	0.174	5	15.2	0.77	-0.377	5	47.3	-0.07552	31.25	1.154	0.207	5	8	0.924	-0.114	5	7.7	0.0551957	7.85		FALSE	FALSE	TRUE	TRUE	1.126	0.171	5
Q04656	Copper-transporting ATPase 1 OS=Homo sapiens GN=ATP7A PE=1 SV=3 - [ATP7A_HUMAN]	ATP7A	143.53	3.73	1	4	4	4	1500	163.3	6.24	0.897	-0.157	4	15.1	0.93	-0.105	4	17	-0.130523	16.05	1.064	0.089	4	3.6	1.083	0.115	4	5.5	0.102322	4.55	0.944	-0.083	4	10.6	1.002	0.003	4	11.4	-0.0394883	11	0	FALSE	FALSE	TRUE	FALSE	1.001	0.001	4
P10909	Clusterin OS=Homo sapiens GN=CLU PE=1 SV=1 - [CLUS_HUMAN]	CLU	650.58	30.96	1	16	16	31	449	52.5	6.27	1.353	0.436	31	32	1.439	0.525	31	33.6	0.481299	32.8	0.903	-0.147	31	17.8	0.831	-0.267	31	28.5	-0.205896	23.15	1.077	0.107	31	18.2	1.222	0.289	31	18.9	0.201006	18.55	3	FALSE	FALSE	TRUE	FALSE	0.969	-0.045	31
P25054	Adenomatous polyposis coli protein OS=Homo sapiens GN=APC PE=1 SV=2 - [APC_HUMAN]	APC	296.22	4.33	1	10	11	12	2843	311.5	7.8	1.111	0.152	10	20	1.067	0.094	10	23	0.123004	21.5	1.069	0.096	10	23.8	1.118	0.161	10	18.1	0.128953	20.95	1.127	0.172	10	29.3	1.15	0.202	10	10.7	0.187134	20	0	FALSE	FALSE	TRUE	FALSE	1.021	0.03	10
P48729	Casein kinase I isoform alpha OS=Homo sapiens GN=CSNK1A1 PE=1 SV=2 - [KC1A_HUMAN]	CSNK1A1	186.93	34.42	1	9	10	11	337	38.9	9.57	1.064	0.089	10	20.4	1.049	0.069	10	17.8	0.0792928	19.1	1.113	0.154	10	14.8	1.113	0.154	10	9.3	0.154454	12.05	1.183	0.242	10	14.7	1.155	0.208	10	13.8	0.225275	14.25	0	FALSE	FALSE	TRUE	FALSE	1.043	0.061	10
O15169	Axin-1 OS=Homo sapiens GN=AXIN1 PE=1 SV=2 - [AXIN1_HUMAN]	AXIN1	27.65	1.62	1	1	1	1	862	95.6	6.96	1.004	0.006	1	NA	1.25	0.322	1	NA	0.172488	NA	0.7	-0.515	1	NA	0.653	-0.615	1	NA	-0.563838	NA	0.697	-0.521	1	NA	0.811	-0.302	1	NA	-0.407364	NA		FALSE	FALSE	FALSE		0.917	-0.125	1
Q969S2	Endonuclease 8-like 2 OS=Homo sapiens GN=NEIL2 PE=1 SV=3 - [NEIL2_HUMAN]	NEIL2	111.02	14.46	1	4	4	5	332	36.8	6.79	1.138	0.187	5	24	1.554	0.636	5	11.5	0.428678	17.75	0.83	-0.269	5	13.4	0.781	-0.357	5	16.5	-0.312044	14.95	0.939	-0.091	5	18.6	1.112	0.153	5	6.3	0.0363275	12.45	6	FALSE	FALSE	TRUE	FALSE	0.896	-0.158	5
Q96T60	Bifunctional polynucleotide phosphatase/kinase OS=Homo sapiens GN=PNKP PE=1 SV=1 - [PNKP_HUMAN]	PNKP	250.42	19	1	9	9	11	521	57	8.46	1.026	0.037	11	13.6	0.854	-0.228	11	20.3	-0.0892673	16.95	1.009	0.013	11	11.8	1.044	0.062	11	16.6	0.0377336	14.2	1.015	0.021	11	14.8	0.957	-0.063	11	17.7	-0.0203404	16.25	0	FALSE	FALSE	TRUE	FALSE	0.979	-0.031	11
P27348	14-3-3 protein theta OS=Homo sapiens GN=YWHAQ PE=1 SV=1 - [1433T_HUMAN]	YWHAQ	8310.15	78.78	1	19	26	279	245	27.7	4.78	1.01	0.014	203	62.1	1.114	0.156	203	52.7	0.0867838	57.4	0.91	-0.136	203	32.1	1.026	0.037	203	24.2	-0.046921	28.15	1.08	0.111	203	52.9	1.217	0.283	203	45.8	0.199751	49.35	0	FALSE	FALSE	TRUE	FALSE	0.957	-0.063	203
Q04917	14-3-3 protein eta OS=Homo sapiens GN=YWHAH PE=1 SV=4 - [1433F_HUMAN]	YWHAH	3237.54	79.67	1	17	27	162	246	28.2	4.84	1.052	0.073	89	25.3	1.068	0.095	89	28.6	0.0840643	26.95	1.074	0.103	89	17.8	1.2	0.263	89	23.9	0.185232	20.85	1.141	0.19	89	19.3	1.274	0.349	89	22	0.272023	20.65	0	FALSE	FALSE	TRUE	FALSE	0.971	-0.042	89
P31947	14-3-3 protein sigma OS=Homo sapiens GN=SFN PE=1 SV=1 - [1433S_HUMAN]	SFN	673.51	18.95	1	1	6	60	248	27.8	4.74	NA	NA	NA	NA	NA	NA	NA	NA	NA	NA	NA	NA	NA	NA	NA	NA	NA	NA	NA	NA	NA	NA	NA	NA	NA	NA	NA	NA	NA	NA		TRUE	FALSE			NA	NA	NA
P99999	Cytochrome c OS=Homo sapiens GN=CYCS PE=1 SV=2 - [CYC_HUMAN]	CYCS	340.95	48.57	1	6	6	12	105	11.7	9.57	1.053	0.075	12	34.9	1.315	0.395	12	42.6	0.243669	38.75	0.973	-0.039	12	12.4	0.68	-0.556	12	39.8	-0.274913	26.1	1.058	0.081	12	28	0.823	-0.281	12	30.8	-0.0885002	29.4	0	FALSE	FALSE	TRUE	FALSE	0.944	-0.083	12
P63098	Calcineurin subunit B type 1 OS=Homo sapiens GN=PPP3R1 PE=1 SV=2 - [CANB1_HUMAN]	PPP3R1	113.28	22.35	1	3	3	3	170	19.3	4.81	1.688	0.755	3	27.4	1.686	0.754	3	11.3	0.75446	19.35	0.86	-0.218	3	2.2	0.892	-0.165	3	7.7	-0.190997	4.95	1.438	0.524	3	4.8	1.387	0.472	3	2.5	0.498251	3.65	3	FALSE	FALSE	TRUE	FALSE	1.004	0.006	3
P98170	E3 ubiquitin-protein ligase XIAP OS=Homo sapiens GN=XIAP PE=1 SV=2 - [XIAP_HUMAN]	XIAP	158.99	10.06	1	4	4	5	497	56.6	6.65	1.105	0.144	5	13.6	1.104	0.143	5	10.5	0.143393	12.05	0.925	-0.112	5	9.5	0.986	-0.02	5	5.9	-0.0656722	7.7	0.967	-0.048	5	17.5	0.972	-0.041	5	27	-0.0446872	22.25	0	FALSE	FALSE	TRUE	FALSE	1.029	0.041	5
Q13158	FAS-associated death domain protein OS=Homo sapiens GN=FADD PE=1 SV=1 - [FADD_HUMAN]	FADD	203.98	34.62	1	5	5	7	208	23.3	5.69	0.828	-0.272	7	74.5	0.705	-0.504	7	63.3	-0.383642	68.9	0.822	-0.283	7	24	1.081	0.112	7	7.5	-0.0717244	15.75	0.758	-0.4	7	55	0.774	-0.37	7	43.3	-0.384584	49.15	4	FALSE	FALSE	TRUE	FALSE	1.092	0.127	7
Q07812	Apoptosis regulator BAX OS=Homo sapiens GN=BAX PE=1 SV=1 - [BAX_HUMAN]	BAX	1586.81	46.35	1	11	11	49	192	21.2	5.22	1.008	0.011	49	18.5	1.001	0.001	49	19.1	0.00647756	18.8	0.975	-0.037	49	14.1	1.094	0.13	49	11.9	0.0489336	13	0.967	-0.048	49	18.4	1.073	0.102	49	17	0.0285692	17.7	0	FALSE	FALSE	TRUE	FALSE	0.934	-0.099	49
Q9HAW4	Claspin OS=Homo sapiens GN=CLSPN PE=1 SV=3 - [CLSPN_HUMAN]	CLSPN	138.82	5.6	1	6	6	8	1339	151	4.82	0.698	-0.519	8	20.6	0.647	-0.628	8	20.9	-0.572394	20.75	0.787	-0.346	8	4.2	0.844	-0.245	8	22.5	-0.294243	13.35	0.588	-0.766	8	33.7	0.509	-0.974	8	15.1	-0.866436	24.4	5	FALSE	FALSE	TRUE	FALSE	1.019	0.027	8
Q16625	Occludin OS=Homo sapiens GN=OCLN PE=1 SV=1 - [OCLN_HUMAN]	OCLN	33.58	2.3	1	1	1	1	522	59.1	6.09	1.022	0.031	1	NA	1.301	0.38	1	NA	0.215989	NA	0.76	-0.396	1	NA	0.759	-0.398	1	NA	-0.396878	NA	0.769	-0.379	1	NA	0.982	-0.026	1	NA	-0.191821	NA		FALSE	FALSE	FALSE		0.932	-0.102	1
P35611	Alpha-adducin OS=Homo sapiens GN=ADD1 PE=1 SV=2 - [ADDA_HUMAN]	ADD1	1631.55	32.29	1	20	21	54	737	80.9	5.83	1.083	0.115	53	36.6	1.12	0.163	53	46	0.139469	41.3	1.087	0.12	53	18.8	1.188	0.249	53	25.3	0.185867	22.05	1.217	0.283	53	27.3	1.278	0.354	53	33.1	0.31904	30.2	1	FALSE	FALSE	TRUE	FALSE	0.971	-0.042	53
P15924	Desmoplakin OS=Homo sapiens GN=DSP PE=1 SV=3 - [DESP_HUMAN]	DSP	696.64	12.37	1	27	28	32	2871	331.6	6.81	0.852	-0.231	31	21.7	0.898	-0.155	31	27.7	-0.192645	24.7	0.802	-0.318	31	16.3	0.771	-0.375	31	15.3	-0.346481	15.8	0.696	-0.523	31	37.9	0.655	-0.61	31	28	-0.565972	32.95	5	FALSE	FALSE	TRUE	FALSE	1.03	0.043	31
P06396	Gelsolin OS=Homo sapiens GN=GSN PE=1 SV=1 - [GELS_HUMAN]	GSN	2756.68	29.54	1	21	21	81	782	85.6	6.28	0.97	-0.044	80	27.4	1.027	0.038	80	20.3	-0.00216567	23.85	1.103	0.141	80	13	1.196	0.258	80	13.8	0.201006	13.4	1.044	0.062	80	22.8	1.235	0.305	80	22.5	0.188401	22.65	0	FALSE	FALSE	TRUE	FALSE	0.997	-0.004	80
P08670	Vimentin OS=Homo sapiens GN=VIM PE=1 SV=4 - [VIME_HUMAN]	VIM	50109.4	99.79	9	86	99	2319	466	53.6	5.12	0.91	-0.136	1928	31.5	0.949	-0.076	1927	32.2	-0.105473	31.85	0.685	-0.546	1928	28.3	0.673	-0.571	1927	31.3	-0.558517	29.8	0.631	-0.664	1928	38.5	0.655	-0.61	1928	35	-0.637109	36.75	5	FALSE	FALSE	TRUE	FALSE	0.966	-0.05	1928
Q9UJU6	Drebrin-like protein OS=Homo sapiens GN=DBNL PE=1 SV=1 - [DBNL_HUMAN]	DBNL	2541.92	53.49	1	22	22	83	430	48.2	5.05	1.054	0.076	82	32.8	1.125	0.17	82	33.9	0.123666	33.35	1.078	0.108	82	11.9	1.191	0.252	82	11.6	0.182057	11.75	1.134	0.181	82	27.9	1.24	0.31	82	26.1	0.24732	27	0	FALSE	FALSE	TRUE	FALSE	0.967	-0.048	82
P55210	Caspase-7 OS=Homo sapiens GN=CASP7 PE=1 SV=1 - [CASP7_HUMAN]	CASP7	78.57	11.55	1	3	3	3	303	34.3	6.07	0.973	-0.039	3	25.7	0.998	-0.003	3	10.1	-0.0210722	17.9	0.92	-0.12	3	10	1.021	0.03	3	20.4	-0.0431999	15.2	0.887	-0.173	3	15.4	0.947	-0.079	3	10.2	-0.125006	12.8	0	FALSE	FALSE	TRUE	FALSE	1.032	0.045	3
P55212	Caspase-6 OS=Homo sapiens GN=CASP6 PE=1 SV=2 - [CASP6_HUMAN]	CASP6	273.13	28.33	1	8	8	20	293	33.3	6.93	1.136	0.184	20	49.2	1.103	0.141	20	44.7	0.162855	46.95	0.963	-0.054	20	14.1	0.977	-0.034	20	20	-0.0439433	17.05	1.097	0.134	20	31.9	1.017	0.024	20	21.5	0.0799754	26.7	0	FALSE	FALSE	TRUE	FALSE	0.982	-0.026	20
O00429	Dynamin-1-like protein OS=Homo sapiens GN=DNM1L PE=1 SV=2 - [DNM1L_HUMAN]	DNM1L	4686.72	67.66	1	49	50	161	736	81.8	6.81	1.016	0.023	160	31.7	1.026	0.037	160	25.5	0.0299829	28.6	1.012	0.017	160	18.3	1.06	0.084	160	16.4	0.051024	17.35	1.009	0.013	160	25.1	1.098	0.135	160	24.2	0.0751903	24.65	0	FALSE	FALSE	TRUE	FALSE	0.958	-0.062	160
P26583	High mobility group protein B2 OS=Homo sapiens GN=HMGB2 PE=1 SV=2 - [HMGB2_HUMAN]	HMGB2	560.54	43.54	1	8	13	40	209	24	7.81	1.114	0.156	20	10.3	1	0	20	11.7	0.0799754	11	1.156	0.209	20	21.4	1.097	0.134	20	23.2	0.171847	22.3	1.254	0.327	20	17.4	1.172	0.229	20	24.5	0.27858	20.95	0	FALSE	FALSE	TRUE	FALSE	0.962	-0.056	20
O00273	DNA fragmentation factor subunit alpha OS=Homo sapiens GN=DFFA PE=1 SV=1 - [DFFA_HUMAN]	DFFA	906.47	47.73	1	14	14	34	331	36.5	4.79	0.938	-0.092	30	23	1.001	0.001	30	27.5	-0.0446872	25.25	0.903	-0.147	30	21.2	0.974	-0.038	30	17	-0.0915713	19.1	0.909	-0.138	30	18.2	0.947	-0.079	30	17.2	-0.107803	17.7	0	FALSE	FALSE	TRUE	FALSE	0.969	-0.045	30
Q9P289	Serine/threonine-protein kinase 26 OS=Homo sapiens GN=STK26 PE=1 SV=2 - [STK26_HUMAN]	STK26	981.66	42.31	1	10	17	39	416	46.5	5.29	1.008	0.011	20	27.3	1.191	0.252	20	34.3	0.136848	30.8	0.745	-0.425	20	15.7	0.75	-0.415	20	20.6	-0.419855	18.15	0.736	-0.442	20	26.6	0.892	-0.165	20	25.1	-0.296899	25.85	6	FALSE	FALSE	TRUE	FALSE	0.928	-0.108	20
Q9Y6E0	Serine/threonine-protein kinase 24 OS=Homo sapiens GN=STK24 PE=1 SV=1 - [STK24_HUMAN]	STK24	801.48	43.12	1	8	18	36	443	49.3	5.69	0.996	-0.006	15	19.8	1.016	0.023	15	34.9	0.00863031	27.35	0.898	-0.155	15	12	0.997	-0.004	15	13.5	-0.0778022	12.75	0.875	-0.193	15	13.7	0.995	-0.007	15	12.2	-0.0969617	12.95	0	FALSE	FALSE	TRUE	FALSE	0.941	-0.088	15
Q9UKV3	Apoptotic chromatin condensation inducer in the nucleus OS=Homo sapiens GN=ACIN1 PE=1 SV=2 - [ACINU_HUMAN]	ACIN1	2860.18	29.9	1	40	40	122	1341	151.8	6.43	0.927	-0.109	121	27	0.924	-0.114	121	25.9	-0.111695	26.45	1.065	0.091	121	17.6	1.082	0.114	121	15.5	0.102322	16.55	0.989	-0.016	121	24.3	0.972	-0.041	121	26.2	-0.0284105	25.25	0	FALSE	FALSE	TRUE	FALSE	0.992	-0.012	121
P10636	Microtubule-associated protein tau OS=Homo sapiens GN=MAPT PE=1 SV=5 - [TAU_HUMAN]	MAPT	272.8	10.82	1	8	8	19	758	78.9	6.71	1.352	0.435	19	41.1	1.047	0.066	19	31	0.262433	36.05	3.616	1.854	19	28.8	3.948	1.981	19	29.1	1.91915	28.95	4.068	2.024	19	63.7	3.7	1.888	19	54.6	1.95754	59.15	2	FALSE	FALSE	TRUE	FALSE	1.149	0.2	19
Q14126	Desmoglein-2 OS=Homo sapiens GN=DSG2 PE=1 SV=2 - [DSG2_HUMAN]	DSG2	526.09	17.44	1	13	13	20	1118	122.2	5.24	1.166	0.222	20	21.3	1.142	0.192	20	29.3	0.206643	25.3	0.819	-0.288	20	26	0.832	-0.265	20	43.3	-0.27666	34.65	0.913	-0.131	20	25.9	0.976	-0.035	20	14.9	-0.0823773	20.4	0	FALSE	FALSE	TRUE	FALSE	1.036	0.051	20
Q9UDY2	Tight junction protein ZO-2 OS=Homo sapiens GN=TJP2 PE=1 SV=2 - [ZO2_HUMAN]	TJP2	423.91	18.74	1	18	18	24	1190	133.9	7.4	0.879	-0.186	24	28.8	0.848	-0.238	24	18.2	-0.211732	23.5	0.715	-0.484	24	17	0.742	-0.431	24	25.1	-0.456999	21.05	0.676	-0.565	24	32.4	0.648	-0.626	24	26.5	-0.595097	29.45	5	FALSE	FALSE	TRUE	FALSE	0.983	-0.025	24
Q7L804	Rab11 family-interacting protein 2 OS=Homo sapiens GN=RAB11FIP2 PE=1 SV=1 - [RFIP2_HUMAN]	RAB11FIP2	275.41	8.98	1	2	4	10	512	58.2	9.32	0.945	-0.082	3	3.8	0.886	-0.175	3	8.9	-0.127368	6.35	1.096	0.132	3	0.1	1.117	0.16	3	4.6	0.146003	2.35	0.894	-0.162	3	11.9	0.955	-0.066	3	3.7	-0.113255	7.8	0	FALSE	FALSE	TRUE	FALSE	0.988	-0.017	3
O43924	Retinal rod rhodopsin-sensitive cGMP 3',5'-cyclic phosphodiesterase subunit delta OS=Homo sapiens GN=PDE6D PE=1 SV=1 - [PDE6D_HUMAN]	PDE6D	175.43	35.33	1	4	4	6	150	17.4	5.67	0.81	-0.304	6	6.5	0.825	-0.278	6	5.6	-0.290709	6.05	0.881	-0.183	6	6	1.076	0.106	6	6.2	-0.0313562	6.1	0.721	-0.472	6	15.3	0.875	-0.193	6	8.8	-0.325539	12.05	4	FALSE	FALSE	TRUE	FALSE	0.923	-0.116	6
Q13438	Protein OS-9 OS=Homo sapiens GN=OS9 PE=1 SV=1 - [OS9_HUMAN]	OS9	350.79	17.39	1	7	7	13	667	75.5	4.87	1.004	0.006	12	13.3	1.026	0.037	12	25	0.0214797	19.15	1.196	0.258	12	6.7	0.957	-0.063	12	17.8	0.106348	12.25	1.091	0.126	12	12.9	1.001	0.001	12	17.8	0.0648829	15.35	0	FALSE	FALSE	TRUE	FALSE	1.114	0.156	12
Q9UBV2	Protein sel-1 homolog 1 OS=Homo sapiens GN=SEL1L PE=1 SV=3 - [SE1L1_HUMAN]	SEL1L	169.13	8.94	1	5	5	5	794	88.7	5.39	1.051	0.072	5	22.9	1.19	0.251	5	26.9	0.164143	24.9	1.13	0.176	5	10.1	0.821	-0.285	5	22.8	-0.0357862	16.45	1.172	0.229	5	23.6	0.972	-0.041	5	34.1	0.100305	28.85	0	FALSE	FALSE	TRUE	FALSE	1.205	0.269	5
Q13813	Spectrin alpha chain, non-erythrocytic 1 OS=Homo sapiens GN=SPTAN1 PE=1 SV=3 - [SPTN1_HUMAN]	SPTAN1	8417.85	55.58	2	130	131	337	2472	284.4	5.35	1.002	0.003	335	37.2	0.984	-0.023	335	34.7	-0.0101344	35.95	0.908	-0.139	335	26.3	0.986	-0.02	335	25.1	-0.0785637	25.7	0.978	-0.032	335	31	1.02	0.029	335	31.7	-0.00144342	31.35	0	FALSE	FALSE	TRUE	FALSE	0.967	-0.048	335
P55072	Transitional endoplasmic reticulum ATPase OS=Homo sapiens GN=VCP PE=1 SV=4 - [TERA_HUMAN]	VCP	10530.7	80.27	4	78	78	411	806	89.3	5.26	0.927	-0.109	404	33.1	0.925	-0.112	404	31.1	-0.110916	32.1	0.975	-0.037	404	15.2	1.063	0.088	404	15.3	0.0271541	15.25	0.93	-0.105	404	29	0.981	-0.028	404	30.8	-0.0656722	29.9	0	FALSE	FALSE	TRUE	FALSE	0.972	-0.041	404
Q9NZ32	Actin-related protein 10 OS=Homo sapiens GN=ACTR10 PE=1 SV=1 - [ARP10_HUMAN]	ACTR10	505.17	35.49	1	9	10	24	417	46.3	7.37	1.124	0.169	22	10.3	1.009	0.013	22	21	0.092884	15.65	1.343	0.425	22	12.6	1.479	0.565	22	16.5	0.496718	14.55	1.448	0.534	22	20	1.432	0.518	22	22.1	0.526069	21.05	1	FALSE	FALSE	TRUE	FALSE	1.025	0.036	22
Q14203	Dynactin subunit 1 OS=Homo sapiens GN=DCTN1 PE=1 SV=3 - [DCTN1_HUMAN]	DCTN1	4783.9	52.35	1	58	59	193	1278	141.6	5.81	0.991	-0.013	186	27.9	1.05	0.07	186	32	0.0292762	29.95	1.183	0.242	186	21.9	1.319	0.399	186	26.7	0.323082	24.3	1.251	0.323	186	23.9	1.395	0.48	186	23.2	0.403813	23.55	1	FALSE	FALSE	TRUE	FALSE	0.961	-0.057	186
P01308	Insulin OS=Homo sapiens GN=INS PE=1 SV=1 - [INS_HUMAN]	INS	1359.39	25.45	2	2	2	33	110	12	5.3	1.165	0.22	33	46	1.139	0.188	33	29.8	0.204141	37.9	0.923	-0.116	33	16.5	1.077	0.107	33	21.6	0	19.05	1.187	0.247	33	26.4	1.317	0.397	33	29.3	0.324235	27.85	3	FALSE	FALSE	TRUE	FALSE	0.999	-0.001	33
Q01082	Spectrin beta chain, non-erythrocytic 1 OS=Homo sapiens GN=SPTBN1 PE=1 SV=2 - [SPTB2_HUMAN]	SPTBN1	8215.74	53.98	4	110	126	330	2364	274.4	5.57	1.152	0.204	281	29.7	1.159	0.213	281	32.3	0.208517	31	0.877	-0.189	281	22.8	0.962	-0.056	281	23.5	-0.121079	23.15	1.024	0.034	281	26.3	1.115	0.157	281	27.8	0.0969365	27.05	0	FALSE	FALSE	TRUE	FALSE	0.971	-0.042	281
O15020	Spectrin beta chain, non-erythrocytic 2 OS=Homo sapiens GN=SPTBN2 PE=1 SV=3 - [SPTN2_HUMAN]	SPTBN2	2151.47	25.52	1	43	55	102	2390	271.2	6.11	1.091	0.126	66	16.1	1.022	0.031	66	25	0.0792928	20.55	1.29	0.367	66	20	1.342	0.424	66	21	0.396159	20.5	1.361	0.445	66	25.8	1.369	0.453	66	29.6	0.448901	27.7	1	FALSE	FALSE	TRUE	FALSE	1.016	0.023	66
P16278	Beta-galactosidase OS=Homo sapiens GN=GLB1 PE=1 SV=2 - [BGAL_HUMAN]	GLB1	669.69	17.43	1	9	9	26	677	76	6.57	1.236	0.306	26	16.1	1.177	0.235	26	16.3	0.270828	16.2	1.09	0.124	26	11.1	1.235	0.305	26	12.6	0.217231	11.85	1.301	0.38	26	16.9	1.455	0.541	26	21.3	0.462576	19.1	3	FALSE	FALSE	TRUE	FALSE	0.976	-0.035	26
P30101	Protein disulfide-isomerase A3 OS=Homo sapiens GN=PDIA3 PE=1 SV=4 - [PDIA3_HUMAN]	PDIA3	8139.54	78.42	1	58	59	341	505	56.7	6.35	0.982	-0.026	332	27.7	1.017	0.024	332	33.7	-0.000721528	30.7	1.062	0.087	332	16	0.922	-0.117	332	15.8	-0.011588	15.9	1.013	0.019	332	23	0.976	-0.035	332	26.7	-0.00795672	24.85	0	FALSE	FALSE	TRUE	FALSE	1.059	0.083	332
P54727	UV excision repair protein RAD23 homolog B OS=Homo sapiens GN=RAD23B PE=1 SV=1 - [RD23B_HUMAN]	RAD23B	1164.57	34.96	1	10	13	64	409	43.1	4.84	0.818	-0.29	51	16.3	0.838	-0.255	51	15.5	-0.272297	15.9	0.988	-0.017	51	13.3	1.065	0.091	51	15.3	0.0377336	14.3	0.781	-0.357	51	11.4	0.88	-0.184	51	14.7	-0.267948	13.05	0	FALSE	FALSE	TRUE	FALSE	0.958	-0.062	51
Q99942	E3 ubiquitin-protein ligase RNF5 OS=Homo sapiens GN=RNF5 PE=1 SV=1 - [RNF5_HUMAN]	RNF5	78.21	9.44	1	1	1	2	180	19.9	6.65	1.075	0.104	2	4.9	0.866	-0.208	2	0.6	-0.0431999	2.75	1.519	0.603	2	11.7	1.189	0.25	2	13.6	0.437228	12.65	1.619	0.695	2	6.7	1.024	0.034	2	13	0.402176	9.85		FALSE	FALSE	FALSE		1.343	0.425	2
Q96GF1	E3 ubiquitin-protein ligase RNF185 OS=Homo sapiens GN=RNF185 PE=1 SV=1 - [RN185_HUMAN]	RNF185	25.85	5.73	1	1	1	2	192	20.4	6.52	1.584	0.664	2	7.7	1.454	0.54	2	7.1	0.603122	7.4	1.506	0.591	2	0.2	0.458	-1.127	2	19	-0.0262051	9.6	2.364	1.241	2	7.9	0.663	-0.593	2	11.7	0.597889	9.8		FALSE	FALSE	FALSE		1.685	0.753	2
P14314	Glucosidase 2 subunit beta OS=Homo sapiens GN=PRKCSH PE=1 SV=2 - [GLU2B_HUMAN]	PRKCSH	1698.95	29.17	1	22	22	67	528	59.4	4.41	1.054	0.076	66	35	1.109	0.149	66	40.2	0.113034	37.6	1.106	0.145	66	19.2	0.941	-0.088	66	17.7	0.0335111	18.45	1.126	0.171	66	23.7	1.073	0.102	66	21.8	0.136848	22.75	0	FALSE	FALSE	TRUE	FALSE	1.066	0.092	66
Q9UKM7	Endoplasmic reticulum mannosyl-oligosaccharide 1,2-alpha-mannosidase OS=Homo sapiens GN=MAN1B1 PE=1 SV=2 - [MA1B1_HUMAN]	MAN1B1	48.71	5.29	1	2	2	2	699	79.5	7.72	1.36	0.444	2	39.5	1.586	0.665	2	39.5	0.558757	39.5	1	0	2	0.2	0.706	-0.502	2	7.3	-0.229382	3.75	1.347	0.43	2	39.3	1.114	0.156	2	47.8	0.299245	43.55		FALSE	FALSE	FALSE		1.07	0.098	2
O60762	Dolichol-phosphate mannosyltransferase subunit 1 OS=Homo sapiens GN=DPM1 PE=1 SV=1 - [DPM1_HUMAN]	DPM1	181.93	36.92	1	7	7	9	260	29.6	9.57	1.158	0.212	9	23.1	1.456	0.542	9	25.6	0.386259	24.35	1.053	0.075	9	8.3	0.924	-0.114	9	17.8	-0.0166871	13.05	1.061	0.085	9	24.6	1.199	0.262	9	23.7	0.176323	24.15	3	FALSE	FALSE	TRUE	FALSE	0.95	-0.074	9
Q9P2X0	Dolichol-phosphate mannosyltransferase subunit 3 OS=Homo sapiens GN=DPM3 PE=1 SV=2 - [DPM3_HUMAN]	DPM3	55.42	10.87	1	1	1	2	92	10.1	5.94	1.123	0.167	2	1.6	1.245	0.316	2	5.5	0.243669	3.55	1.028	0.04	2	6	0.89	-0.168	2	12.2	-0.0603973	9.1	1.144	0.194	2	4.4	1.103	0.141	2	6.7	0.168	5.55		FALSE	FALSE	FALSE		1.095	0.131	2
Q86SQ9	Dehydrodolichyl diphosphate synthase complex subunit DHDDS OS=Homo sapiens GN=DHDDS PE=1 SV=3 - [DHDDS_HUMAN]	DHDDS	44.07	3.3	1	1	1	1	333	38.6	8.28	1.562	0.643	1	NA	1.217	0.283	1	NA	0.474566	NA	0.77	-0.377	1	NA	1.091	0.126	1	NA	-0.103922	NA	1.192	0.253	1	NA	1.321	0.402	1	NA	0.329411	NA		FALSE	FALSE	FALSE		1.03	0.043	1
Q9Y223	Bifunctional UDP-N-acetylglucosamine 2-epimerase/N-acetylmannosamine kinase OS=Homo sapiens GN=GNE PE=1 SV=1 - [GLCNE_HUMAN]	GNE	263.74	14.54	1	8	8	15	722	79.2	6.8	1.103	0.141	15	23.2	0.989	-0.016	15	38	0.0648829	30.6	0.861	-0.216	15	15.2	0.92	-0.12	15	21	-0.167312	18.1	0.947	-0.079	15	10.7	0.906	-0.142	15	11.9	-0.110137	11.3	0	FALSE	FALSE	TRUE	FALSE	1.007	0.01	15
P39656	Dolichyl-diphosphooligosaccharide--protein glycosyltransferase 48 kDa subunit OS=Homo sapiens GN=DDOST PE=1 SV=4 - [OST48_HUMAN]	DDOST	335.16	18.86	1	7	7	23	456	50.8	6.55	1.032	0.045	23	16.8	1.163	0.218	23	19.5	0.134221	18.15	1.018	0.026	23	21.2	0.804	-0.315	23	29.4	-0.134477	25.3	1.083	0.115	23	15.5	0.961	-0.057	23	10.2	0.0313952	12.85	0	FALSE	FALSE	TRUE	FALSE	1.13	0.176	23
Q9UK41	Vacuolar protein sorting-associated protein 28 homolog OS=Homo sapiens GN=VPS28 PE=1 SV=1 - [VPS28_HUMAN]	VPS28	288.78	42.99	1	8	8	20	221	25.4	5.54	0.982	-0.026	20	32.6	1.02	0.029	20	28.7	0.00144197	30.65	1.086	0.119	20	17	1.173	0.23	20	15.7	0.175684	16.35	1.074	0.103	20	15.3	1.19	0.251	20	26.4	0.178874	20.85	0	FALSE	FALSE	TRUE	FALSE	0.966	-0.05	20
Q9H9H4	Vacuolar protein sorting-associated protein 37B OS=Homo sapiens GN=VPS37B PE=1 SV=1 - [VP37B_HUMAN]	VPS37B	325.11	26.32	1	6	6	11	285	31.3	7.34	0.954	-0.068	11	9.5	0.994	-0.009	11	5.1	-0.0380063	7.3	1.02	0.029	11	7.4	1.04	0.057	11	10.5	0.0426443	8.95	0.98	-0.029	11	9.3	1.019	0.027	11	9.3	-0.000721528	9.3	0	FALSE	FALSE	TRUE	FALSE	1.004	0.006	11
Q9NZ09	Ubiquitin-associated protein 1 OS=Homo sapiens GN=UBAP1 PE=1 SV=1 - [UBAP1_HUMAN]	UBAP1	651.94	28.49	1	10	10	19	502	55	5.11	1.03	0.043	18	12.5	1.027	0.038	18	23.6	0.0405418	18.05	0.943	-0.085	18	11.4	1.017	0.024	18	16.6	-0.0291463	14	0.976	-0.035	18	10	1.001	0.001	18	18.8	-0.0166871	14.4	0	FALSE	FALSE	TRUE	FALSE	1.037	0.052	18
A5D8V6	Vacuolar protein sorting-associated protein 37C OS=Homo sapiens GN=VPS37C PE=1 SV=2 - [VP37C_HUMAN]	VPS37C	23.58	4.79	1	1	1	1	355	38.6	5.21	0.737	-0.44	1	NA	0.569	-0.813	1	NA	-0.614845	NA	1.26	0.333	1	NA	1.517	0.601	1	NA	0.473527	NA	0.92	-0.12	1	NA	0.859	-0.219	1	NA	-0.168933	NA		FALSE	FALSE	FALSE		1.115	0.157	1
Q99816	Tumor susceptibility gene 101 protein OS=Homo sapiens GN=TSG101 PE=1 SV=2 - [TS101_HUMAN]	TSG101	505.5	45.9	1	18	18	24	390	43.9	6.46	1.209	0.274	24	29.7	1.129	0.175	24	34.9	0.225275	32.3	1.025	0.036	24	16.9	1.023	0.033	24	17.3	0.0342157	17.1	1.217	0.283	24	26.5	1.232	0.301	24	19.3	0.292193	22.9	0	FALSE	FALSE	TRUE	FALSE	1.001	0.001	24
Q8NEZ2	Vacuolar protein sorting-associated protein 37A OS=Homo sapiens GN=VPS37A PE=1 SV=1 - [VP37A_HUMAN]	VPS37A	130.94	9.07	1	3	3	4	397	44.3	5.57	0.757	-0.402	4	7.7	0.847	-0.24	4	25.2	-0.318326	16.45	1.021	0.03	4	16.1	1.048	0.068	4	3.6	0.0489336	9.85	0.811	-0.302	4	8.7	0.869	-0.203	4	8.9	-0.251539	8.8	4	FALSE	FALSE	TRUE	FALSE	0.931	-0.103	4
Q96EY5	Multivesicular body subunit 12A OS=Homo sapiens GN=MVB12A PE=1 SV=1 - [MB12A_HUMAN]	MVB12A	252.56	21.61	1	4	4	7	273	28.8	8.91	1.006	0.009	7	17.3	0.969	-0.045	7	4.6	-0.0181473	10.95	0.864	-0.211	7	15.7	0.797	-0.327	7	3.2	-0.267948	9.45	0.958	-0.062	7	13.9	0.855	-0.226	7	17.8	-0.141621	15.85	0	FALSE	FALSE	TRUE	FALSE	0.992	-0.012	7
Q9H7P6	Multivesicular body subunit 12B OS=Homo sapiens GN=MVB12B PE=1 SV=2 - [MB12B_HUMAN]	MVB12B	72.87	16.61	1	3	3	4	319	35.6	8.15	1.117	0.16	4	29	1.035	0.05	4	13.6	0.105678	21.3	1.525	0.609	4	10.9	1.741	0.8	4	6.4	0.707525	8.65	1.657	0.729	4	14.9	1.731	0.792	4	8.4	0.760434	11.65	2	FALSE	FALSE	TRUE	FALSE	0.946	-0.08	4
P27797	Calreticulin OS=Homo sapiens GN=CALR PE=1 SV=1 - [CALR_HUMAN]	CALR	6488.09	46.52	1	21	21	220	417	48.1	4.44	1.174	0.231	215	30.3	1.223	0.29	215	35.7	0.26123	33	0.927	-0.109	215	14.9	0.8	-0.322	215	17.8	-0.211732	16.35	1.099	0.136	215	26.9	1.008	0.011	215	24.9	0.0751903	25.9	0	FALSE	FALSE	TRUE	FALSE	1.074	0.103	215
P27824	Calnexin OS=Homo sapiens GN=CANX PE=1 SV=2 - [CALX_HUMAN]	CANX	2470.82	37.67	1	26	27	107	592	67.5	4.6	1.092	0.127	106	29.1	1.409	0.495	106	29.2	0.322505	29.15	1.144	0.194	106	19	0.685	-0.546	106	25.8	-0.128945	22.4	1.231	0.3	106	16.5	0.923	-0.116	106	16.4	0.107018	16.45		FALSE	FALSE	TRUE	TRUE	1.205	0.269	106
P18850	Cyclic AMP-dependent transcription factor ATF-6 alpha OS=Homo sapiens GN=ATF6 PE=1 SV=3 - [ATF6A_HUMAN]	ATF6	41.47	2.24	4	1	2	4	670	74.5	8.22	1.106	0.145	2	5	0.973	-0.039	2	3.2	0.0558898	4.1	0.967	-0.048	2	6.4	0.785	-0.349	2	1.1	-0.190997	3.75	1.06	0.084	2	11.5	0.76	-0.396	2	2.1	-0.136062	6.8		FALSE	FALSE	FALSE		1.259	0.332	2
Q96S52	GPI transamidase component PIG-S OS=Homo sapiens GN=PIGS PE=1 SV=3 - [PIGS_HUMAN]	PIGS	114.95	7.39	1	3	3	4	555	61.6	6.49	0.971	-0.042	4	25.2	1.175	0.233	4	34.2	0.10165	29.7	1.258	0.331	4	4.5	0.908	-0.139	4	24.1	0.115033	14.3	1.233	0.302	4	20.2	1.035	0.05	4	18.1	0.181421	19.15	0	FALSE	FALSE	TRUE	FALSE	1.061	0.085	4
O43292	Glycosylphosphatidylinositol anchor attachment 1 protein OS=Homo sapiens GN=GPAA1 PE=1 SV=3 - [GPAA1_HUMAN]	GPAA1	35.06	1.61	1	1	1	1	621	67.6	8.06	1.458	0.544	1	NA	2.026	1.019	1	NA	0.800745	NA	1.649	0.722	1	NA	0.884	-0.178	1	NA	0.340847	NA	2.383	1.253	1	NA	1.782	0.833	1	NA	1.05832	NA		FALSE	FALSE	FALSE		1.257	0.33	1
Q969N2	GPI transamidase component PIG-T OS=Homo sapiens GN=PIGT PE=1 SV=1 - [PIGT_HUMAN]	PIGT	181.78	7.44	1	5	5	9	578	65.7	8.38	0.917	-0.125	9	26.6	1.031	0.044	9	21.4	-0.0380063	24	1.231	0.3	9	8.6	0.945	-0.082	9	16.3	0.121679	12.45	1.118	0.161	9	13.1	1.052	0.073	9	16.8	0.117695	14.95	0	FALSE	FALSE	TRUE	FALSE	1.069	0.096	9
Q92643	GPI-anchor transamidase OS=Homo sapiens GN=PIGK PE=1 SV=2 - [GPI8_HUMAN]	PIGK	65.16	3.04	1	1	1	4	395	45.2	6.16	0.918	-0.123	4	14.9	0.941	-0.088	4	29	-0.105473	21.95	1.11	0.151	4	14.9	0.913	-0.131	4	21.3	0.0164963	18.1	1.055	0.077	4	37.2	0.778	-0.362	4	26.7	-0.125793	31.95	0	FALSE	FALSE	TRUE	FALSE	1.116	0.158	4
Q75T13	GPI inositol-deacylase OS=Homo sapiens GN=PGAP1 PE=1 SV=1 - [PGAP1_HUMAN]	PGAP1	25.05	0.87	1	1	1	1	922	105.3	9.01	1.523	0.607	1	NA	0.997	-0.004	1	NA	0.333424	NA	2.408	1.268	1	NA	1.704	0.769	1	NA	1.03984	NA	3.636	1.862	1	NA	1.691	0.758	1	NA	1.41332	NA		FALSE	FALSE	FALSE		1.433	0.519	1
Q03405	Urokinase plasminogen activator surface receptor OS=Homo sapiens GN=PLAUR PE=1 SV=1 - [UPAR_HUMAN]	PLAUR	68	6.27	1	1	1	1	335	37	6.65	0.95	-0.074	1	NA	0.853	-0.229	1	NA	-0.149601	NA	0.958	-0.062	1	NA	1.287	0.364	1	NA	0.166715	NA	0.902	-0.149	1	NA	1.092	0.127	1	NA	-0.00433459	NA		FALSE	FALSE	FALSE		1.014	0.02	1
O75475	PC4 and SFRS1-interacting protein OS=Homo sapiens GN=PSIP1 PE=1 SV=1 - [PSIP1_HUMAN]	PSIP1	1334.1	43.77	1	25	26	68	530	60.1	9.13	1.028	0.04	60	25.8	1.214	0.28	60	17.1	0.164786	21.45	0.996	-0.006	60	22.5	0.871	-0.199	60	23.3	-0.0992781	22.9	1.106	0.145	60	40	0.971	-0.042	60	26.8	0.0545012	33.4	0	FALSE	FALSE	TRUE	FALSE	0.991	-0.013	60
Q15172	Serine/threonine-protein phosphatase 2A 56 kDa regulatory subunit alpha isoform OS=Homo sapiens GN=PPP2R5A PE=1 SV=1 - [2A5A_HUMAN]	PPP2R5A	69.27	5.97	3	2	3	5	486	56.2	6.71	1.304	0.383	2	62.1	1.034	0.048	2	23.5	0.225275	42.8	1.014	0.02	2	7	0.9	-0.152	2	0.5	-0.0634092	3.75	1.31	0.39	2	71.2	0.927	-0.109	2	24	0.161565	47.6		FALSE	FALSE	FALSE		1.142	0.192	2
Q16537	Serine/threonine-protein phosphatase 2A 56 kDa regulatory subunit epsilon isoform OS=Homo sapiens GN=PPP2R5E PE=1 SV=1 - [2A5E_HUMAN]	PPP2R5E	492.36	28.91	1	13	15	30	467	54.7	6.95	1.044	0.062	27	22.2	1.151	0.203	27	19.7	0.134221	20.95	1.241	0.312	27	13.8	1.317	0.397	27	19.6	0.355016	16.7	1.29	0.367	27	15.6	1.377	0.462	27	20.2	0.415218	17.9	1	FALSE	FALSE	TRUE	FALSE	0.947	-0.079	27
Q15173	Serine/threonine-protein phosphatase 2A 56 kDa regulatory subunit beta isoform OS=Homo sapiens GN=PPP2R5B PE=1 SV=1 - [2A5B_HUMAN]	PPP2R5B	52.9	6.64	1	1	3	4	497	57.4	6.71	1.03	0.043	1	NA	0.885	-0.176	1	NA	-0.0626556	NA	1.298	0.376	1	NA	1.806	0.853	1	NA	0.634129	NA	1.325	0.406	1	NA	1.589	0.668	1	NA	0.543001	NA		FALSE	FALSE	FALSE		1.015	0.021	1
Q13362	Serine/threonine-protein phosphatase 2A 56 kDa regulatory subunit gamma isoform OS=Homo sapiens GN=PPP2R5C PE=1 SV=3 - [2A5G_HUMAN]	PPP2R5C	305.86	23.47	1	4	11	18	524	61	6.87	1.395	0.48	8	21	1.252	0.324	8	24.3	0.404358	22.65	1.059	0.083	8	29.5	1.071	0.099	8	32.1	0.0908534	30.8	1.248	0.32	8	16.3	1.309	0.388	8	22.7	0.354452	19.5	3	FALSE	FALSE	TRUE	FALSE	0.941	-0.088	8
P49841	Glycogen synthase kinase-3 beta OS=Homo sapiens GN=GSK3B PE=1 SV=2 - [GSK3B_HUMAN]	GSK3B	486.74	49.05	1	10	15	32	420	46.7	8.78	1.053	0.075	23	11.8	1.064	0.089	23	22	0.0820213	16.9	1.403	0.489	23	23.2	1.485	0.57	23	17.8	0.530071	20.5	1.416	0.502	23	27.6	1.533	0.616	23	23.2	0.560226	25.4	1	FALSE	FALSE	TRUE	FALSE	0.99	-0.014	23
P32004	Neural cell adhesion molecule L1 OS=Homo sapiens GN=L1CAM PE=1 SV=2 - [L1CAM_HUMAN]	L1CAM	263.16	11.46	4	14	15	18	1257	139.9	6.24	1.114	0.156	16	24.9	1.115	0.157	16	35.8	0.156397	30.35	1.51	0.595	16	25.7	1.579	0.659	16	24.5	0.62714	25.1	1.55	0.632	16	59	1.68	0.748	16	45.2	0.691534	52.1	1	FALSE	FALSE	TRUE	FALSE	1.091	0.126	16
P62937	Peptidyl-prolyl cis-trans isomerase A OS=Homo sapiens GN=PPIA PE=1 SV=2 - [PPIA_HUMAN]	PPIA	6462.9	91.52	6	22	23	289	165	18	7.81	0.797	-0.327	272	62.9	0.848	-0.238	272	51.2	-0.281912	57.05	1.017	0.024	272	26.9	1.159	0.213	272	23.4	0.121679	25.15	0.926	-0.111	272	41.7	1.05	0.07	272	37.7	-0.0174171	39.7	0	FALSE	FALSE	TRUE	FALSE	0.961	-0.057	272
Q13356	Peptidyl-prolyl cis-trans isomerase-like 2 OS=Homo sapiens GN=PPIL2 PE=1 SV=1 - [PPIL2_HUMAN]	PPIL2	148.61	14.42	1	6	6	7	520	58.8	8.78	0.915	-0.128	7	6.9	0.969	-0.045	7	11.2	-0.086201	9.05	1.212	0.277	7	12.6	1.093	0.128	7	14.7	0.204767	13.65	1.098	0.135	7	10.8	1.048	0.068	7	23.2	0.10165	17	0	FALSE	FALSE	TRUE	FALSE	1.043	0.061	7
Q03135	Caveolin-1 OS=Homo sapiens GN=CAV1 PE=1 SV=4 - [CAV1_HUMAN]	CAV1	112.71	15.17	2	3	3	5	178	20.5	6.02	0.886	-0.175	5	8.5	0.972	-0.041	5	11.4	-0.106249	9.95	1.119	0.162	5	5.4	0.822	-0.283	5	22.6	-0.0431999	14	0.963	-0.054	5	8	0.804	-0.315	5	8	-0.178698	8		FALSE	FALSE	TRUE	TRUE	1.185	0.245	5
Q8NFJ9	Bardet-Biedl syndrome 1 protein OS=Homo sapiens GN=BBS1 PE=1 SV=1 - [BBS1_HUMAN]	BBS1	54.61	3.37	1	1	1	1	593	65	7.93	1.005	0.007	1	NA	1.099	0.136	1	NA	0.0731347	NA	0.955	-0.066	1	NA	1.094	0.13	1	NA	0.03492	NA	0.951	-0.072	1	NA	1.196	0.258	1	NA	0.102322	NA		FALSE	FALSE	FALSE		1.001	0.001	1
Q9H0F7	ADP-ribosylation factor-like protein 6 OS=Homo sapiens GN=ARL6 PE=1 SV=1 - [ARL6_HUMAN]	ARL6	41.35	5.91	1	1	1	1	186	21.1	8.54	1.178	0.236	1	NA	1.02	0.029	1	NA	0.136191	NA	1.297	0.375	1	NA	1.476	0.562	1	NA	0.471448	NA	1.515	0.599	1	NA	1.499	0.584	1	NA	0.591679	NA		FALSE	FALSE	FALSE		1.045	0.064	1
Q9BXC9	Bardet-Biedl syndrome 2 protein OS=Homo sapiens GN=BBS2 PE=1 SV=1 - [BBS2_HUMAN]	BBS2	79.84	4.58	1	4	4	7	721	79.8	6.15	0.993	-0.01	7	10	1.046	0.065	7	16.2	0.0278618	13.1	1.245	0.316	7	12.5	1.202	0.265	7	10	0.291014	11.25	1.225	0.293	7	5.7	1.337	0.419	7	24.8	0.35727	15.25	1	FALSE	FALSE	TRUE	FALSE	0.957	-0.063	7
Q9NQ48	Leucine zipper transcription factor-like protein 1 OS=Homo sapiens GN=LZTFL1 PE=1 SV=1 - [LZTL1_HUMAN]	LZTFL1	832.71	43.48	1	11	11	23	299	34.6	5.36	0.802	-0.318	21	18.2	0.757	-0.402	21	12.5	-0.359379	15.35	1.104	0.143	21	20.8	1.152	0.204	21	19.9	0.173767	20.35	0.771	-0.375	21	29.1	0.828	-0.272	21	22.2	-0.32283	25.65	4	FALSE	FALSE	TRUE	FALSE	0.992	-0.012	21
Q3SYG4	Protein PTHB1 OS=Homo sapiens GN=BBS9 PE=1 SV=1 - [PTHB1_HUMAN]	BBS9	22.72	1.13	1	1	1	1	887	99.2	5.55	1.177	0.235	1	NA	0.97	-0.044	1	NA	0.102322	NA	1.228	0.296	1	NA	1.437	0.523	1	NA	0.414136	NA	1.432	0.518	1	NA	1.387	0.472	1	NA	0.495183	NA		FALSE	FALSE	FALSE		1.113	0.154	1
Q96RK4	Bardet-Biedl syndrome 4 protein OS=Homo sapiens GN=BBS4 PE=1 SV=2 - [BBS4_HUMAN]	BBS4	39.09	1.35	1	1	1	1	519	58.2	7.31	0.998	-0.003	1	NA	1.124	0.169	1	NA	0.0854247	NA	1.026	0.037	1	NA	1.054	0.076	1	NA	0.0565835	NA	1.015	0.021	1	NA	1.179	0.238	1	NA	0.133564	NA		FALSE	FALSE	FALSE		0.885	-0.176	1
P09960	Leukotriene A-4 hydrolase OS=Homo sapiens GN=LTA4H PE=1 SV=2 - [LKHA4_HUMAN]	LTA4H	2487.46	63.34	1	34	34	96	611	69.2	6.18	0.982	-0.026	96	22.7	1.044	0.062	96	24.1	0.0186342	23.4	0.972	-0.041	96	16.5	0.985	-0.022	96	18.6	-0.0313562	17.55	0.948	-0.077	96	18.8	1.063	0.088	96	19.3	0.00791308	19.05	0	FALSE	FALSE	TRUE	FALSE	0.916	-0.127	96
Q14914	Prostaglandin reductase 1 OS=Homo sapiens GN=PTGR1 PE=1 SV=2 - [PTGR1_HUMAN]	PTGR1	1188.16	50.15	1	14	14	47	329	35.8	8.29	1.03	0.043	47	20.2	1.117	0.16	47	21.9	0.102322	21.05	1.03	0.043	47	10	1.056	0.079	47	10.8	0.0607392	10.4	1.09	0.124	47	12.6	1.182	0.241	47	20.7	0.183963	16.65	0	FALSE	FALSE	TRUE	FALSE	0.911	-0.134	47
Q9UK39	Nocturnin OS=Homo sapiens GN=NOCT PE=2 SV=2 - [NOCT_HUMAN]	NOCT	69.64	4.41	1	1	1	1	431	48.2	7.23	1.123	0.167	1	NA	1.088	0.122	1	NA	0.144699	NA	0.923	-0.116	1	NA	1.017	0.024	1	NA	-0.0439433	NA	1.027	0.038	1	NA	1.101	0.139	1	NA	0.0894982	NA		FALSE	FALSE	FALSE		1.011	0.016	1
P11182	Lipoamide acyltransferase component of branched-chain alpha-keto acid dehydrogenase complex, mitochondrial OS=Homo sapiens GN=DBT PE=1 SV=3 - [ODB2_HUMAN]	DBT	458.38	24.9	1	9	9	15	482	53.5	8.51	0.967	-0.048	15	18.9	1.072	0.1	15	24.8	0.0278618	21.85	1.119	0.162	15	12	1.044	0.062	15	22.7	0.113034	17.35	1.107	0.147	15	20.5	1.083	0.115	15	16.8	0.130931	18.65	0	FALSE	FALSE	TRUE	FALSE	1.015	0.021	15
P12694	2-oxoisovalerate dehydrogenase subunit alpha, mitochondrial OS=Homo sapiens GN=BCKDHA PE=1 SV=2 - [ODBA_HUMAN]	BCKDHA	319.29	21.8	1	7	7	11	445	50.4	8.27	1.011	0.016	11	19.1	0.944	-0.083	11	14.1	-0.0328314	16.6	1.114	0.156	11	13.6	1.05	0.07	11	11.9	0.1137	12.75	1.08	0.111	11	17.8	0.999	-0.001	11	23.1	0.0558898	20.45	0	FALSE	FALSE	TRUE	FALSE	1.064	0.089	11
P21953	2-oxoisovalerate dehydrogenase subunit beta, mitochondrial OS=Homo sapiens GN=BCKDHB PE=1 SV=2 - [ODBB_HUMAN]	BCKDHB	194.18	20.92	1	6	6	8	392	43.1	6.29	1.12	0.163	8	27	1.013	0.019	8	15.3	0.092884	21.15	0.964	-0.053	8	12.7	1.005	0.007	8	14.8	-0.0225369	13.75	1.022	0.031	8	18.6	0.897	-0.157	8	13.2	-0.0596453	15.9	0	FALSE	FALSE	TRUE	FALSE	1.035	0.05	8
Q9UKU7	Isobutyryl-CoA dehydrogenase, mitochondrial OS=Homo sapiens GN=ACAD8 PE=1 SV=1 - [ACAD8_HUMAN]	ACAD8	196.41	17.11	1	7	7	8	415	45	7.85	1.014	0.02	8	20.6	0.969	-0.045	8	13	-0.0123153	16.8	1.098	0.135	8	9.9	1.203	0.267	8	11.7	0.202261	10.8	1.219	0.286	8	10.9	1.175	0.233	8	17.7	0.259423	14.3	0	FALSE	FALSE	TRUE	FALSE	1.045	0.064	8
P54687	Branched-chain-amino-acid aminotransferase, cytosolic OS=Homo sapiens GN=BCAT1 PE=1 SV=3 - [BCAT1_HUMAN]	BCAT1	2142.01	46.63	1	22	22	81	386	42.9	5.3	0.963	-0.054	80	17.7	1.05	0.07	80	23.3	0.00934717	20.5	0.773	-0.371	80	22.8	0.783	-0.353	80	26.1	-0.362158	24.45	0.719	-0.476	80	25.9	0.856	-0.224	80	26.5	-0.344648	26.2	5	FALSE	FALSE	TRUE	FALSE	0.897	-0.157	80
P45954	Short/branched chain specific acyl-CoA dehydrogenase, mitochondrial OS=Homo sapiens GN=ACADSB PE=1 SV=1 - [ACDSB_HUMAN]	ACADSB	428.63	28.24	1	10	10	16	432	47.5	6.99	0.88	-0.184	16	15.5	0.982	-0.026	16	18.1	-0.103147	16.8	1.06	0.084	16	9.6	1.021	0.03	16	10.6	0.057277	10.1	0.944	-0.083	16	16.3	0.991	-0.013	16	16.1	-0.0476664	16.2	0	FALSE	FALSE	TRUE	FALSE	1.007	0.01	16
O15382	Branched-chain-amino-acid aminotransferase, mitochondrial OS=Homo sapiens GN=BCAT2 PE=1 SV=2 - [BCAT2_HUMAN]	BCAT2	159.05	14.8	1	5	5	6	392	44.3	8.65	1.05	0.07	6	9.5	1.029	0.041	6	11.1	0.0558898	10.3	1.006	0.009	6	10	1.058	0.081	6	12.6	0.045443	11.3	1.071	0.099	6	19.4	1.145	0.195	6	11.4	0.147958	15.4	0	FALSE	FALSE	TRUE	FALSE	0.991	-0.013	6
Q13825	Methylglutaconyl-CoA hydratase, mitochondrial OS=Homo sapiens GN=AUH PE=1 SV=1 - [AUHM_HUMAN]	AUH	0	3.83	1	1	2	2	339	35.6	9.48	1.004	0.006	1	NA	0.9	-0.152	1	NA	-0.0709665	NA	1.069	0.096	1	NA	1.3	0.379	1	NA	0.244278	NA	1.064	0.089	1	NA	1.165	0.22	1	NA	0.156397	NA		FALSE	FALSE	FALSE		0.962	-0.056	1
P31937	3-hydroxyisobutyrate dehydrogenase, mitochondrial OS=Homo sapiens GN=HIBADH PE=1 SV=2 - [3HIDH_HUMAN]	HIBADH	748.44	36.01	1	10	10	23	336	35.3	8.13	1.011	0.016	23	17.2	0.957	-0.063	23	19.4	-0.0232698	18.3	1.054	0.076	23	7.5	1.139	0.188	23	16.2	0.132906	11.85	1.006	0.009	23	20.7	1.107	0.147	23	16.2	0.0792928	18.45	0	FALSE	FALSE	TRUE	FALSE	0.996	-0.006	23
Q6NVY1	3-hydroxyisobutyryl-CoA hydrolase, mitochondrial OS=Homo sapiens GN=HIBCH PE=1 SV=2 - [HIBCH_HUMAN]	HIBCH	676.98	46.11	1	20	20	39	386	43.5	8.19	1.06	0.084	39	30.7	1.121	0.165	39	29.4	0.12499	30.05	1.023	0.033	39	12.5	0.965	-0.051	39	17	-0.00868224	14.75	1.097	0.134	39	20.8	1.078	0.108	39	17.5	0.121015	19.15	0	FALSE	FALSE	TRUE	FALSE	0.981	-0.028	39
O14874	[3-methyl-2-oxobutanoate dehydrogenase [lipoamide]] kinase, mitochondrial OS=Homo sapiens GN=BCKDK PE=1 SV=2 - [BCKD_HUMAN]	BCKDK	137.76	12.86	1	4	4	6	412	46.3	8.82	1.008	0.011	6	16	1.039	0.055	6	14	0.0335111	15	0.975	-0.037	6	8.7	1.105	0.144	6	27.6	0.0565835	18.15	1.137	0.185	6	24.3	1.104	0.143	6	13.7	0.164143	19	0	FALSE	FALSE	TRUE	FALSE	1.033	0.047	6
Q02252	Methylmalonate-semialdehyde dehydrogenase [acylating], mitochondrial OS=Homo sapiens GN=ALDH6A1 PE=1 SV=2 - [MMSA_HUMAN]	ALDH6A1	460.54	29.35	2	16	16	28	535	57.8	8.5	1.043	0.061	28	11.2	1.021	0.03	28	18.2	0.045443	14.7	1.031	0.044	28	12.2	0.943	-0.085	28	27.1	-0.018878	19.65	1.066	0.092	28	16.1	1.024	0.034	28	15.1	0.0635029	15.6	0	FALSE	FALSE	TRUE	FALSE	0.995	-0.007	28
P26440	Isovaleryl-CoA dehydrogenase, mitochondrial OS=Homo sapiens GN=IVD PE=1 SV=1 - [IVD_HUMAN]	IVD	596.16	33.1	1	13	13	27	423	46.3	8.19	0.952	-0.071	27	13.8	0.898	-0.155	27	17.7	-0.112475	15.75	0.988	-0.017	27	13.9	1.01	0.014	27	7	-0.00144342	10.45	0.937	-0.094	27	8.3	0.902	-0.149	27	10.9	-0.121079	9.6	0	FALSE	FALSE	TRUE	FALSE	1.043	0.061	27
Q9GZS1	DNA-directed RNA polymerase I subunit RPA49 OS=Homo sapiens GN=POLR1E PE=1 SV=2 - [RPA49_HUMAN]	POLR1E	97.2	6.03	1	3	3	3	481	53.9	8.56	0.801	-0.32	3	2	1.034	0.048	3	17.5	-0.12422	9.75	0.796	-0.329	3	3.3	0.663	-0.593	3	16.6	-0.45502	9.95	0.637	-0.651	3	1.2	0.601	-0.735	3	2.4	-0.691989	1.8	5	FALSE	FALSE	TRUE	FALSE	1.059	0.083	3
Q9H9Y6	DNA-directed RNA polymerase I subunit RPA2 OS=Homo sapiens GN=POLR1B PE=1 SV=2 - [RPA2_HUMAN]	POLR1B	147.57	6.7	1	7	7	9	1135	128.1	7.83	1.028	0.04	9	19.8	1.018	0.026	9	27.6	0.0328061	23.7	0.787	-0.346	9	22.4	0.746	-0.423	9	12.7	-0.383642	17.55	0.899	-0.154	9	8.5	0.789	-0.342	9	23.3	-0.244685	15.9	6	FALSE	FALSE	TRUE	FALSE	0.943	-0.085	9
Q3B726	DNA-directed RNA polymerase I subunit RPA43 OS=Homo sapiens GN=TWISTNB PE=1 SV=1 - [RPA43_HUMAN]	TWISTNB	49.58	9.17	1	3	3	4	338	37.4	6.98	0.904	-0.146	4	8.6	0.965	-0.051	4	16.3	-0.0977334	12.45	0.656	-0.608	4	5.3	0.646	-0.63	4	2.1	-0.619271	3.7	0.562	-0.831	4	1.6	0.622	-0.685	4	18.4	-0.756331	10	5	FALSE	FALSE	TRUE	FALSE	0.981	-0.028	4
O95602	DNA-directed RNA polymerase I subunit RPA1 OS=Homo sapiens GN=POLR1A PE=1 SV=2 - [RPA1_HUMAN]	POLR1A	205.08	8.72	1	11	11	12	1720	194.7	7.03	0.964	-0.053	12	10.2	1.009	0.013	12	16.2	-0.019609	13.2	0.908	-0.139	12	18	0.873	-0.196	12	23.3	-0.167312	20.65	0.827	-0.274	12	17.6	0.865	-0.209	12	8.8	-0.24127	13.2	0	FALSE	FALSE	TRUE	FALSE	1.04	0.057	12
O15446	DNA-directed RNA polymerase I subunit RPA34 OS=Homo sapiens GN=CD3EAP PE=1 SV=1 - [RPA34_HUMAN]	CD3EAP	38.97	6.08	1	2	2	2	510	55	8.51	0.874	-0.194	2	35.3	0.944	-0.083	2	30.7	-0.137648	33	0.828	-0.272	2	6.9	0.802	-0.318	2	14.5	-0.295128	10.7	0.717	-0.48	2	43	0.754	-0.407	2	46.7	-0.443203	44.85		FALSE	FALSE	FALSE		0.967	-0.048	2
Q9UGI6	Small conductance calcium-activated potassium channel protein 3 OS=Homo sapiens GN=KCNN3 PE=2 SV=1 - [KCNN3_HUMAN]	KCNN3	21.77	2.85	1	1	1	1	736	82	8.95	0.996	-0.006	1	NA	1.297	0.375	1	NA	0.197236	NA	0.997	-0.004	1	NA	1.007	0.01	1	NA	0.00288251	NA	0.984	-0.023	1	NA	1.299	0.377	1	NA	0.190931	NA		FALSE	FALSE	FALSE		0.811	-0.302	1
Q13541	Eukaryotic translation initiation factor 4E-binding protein 1 OS=Homo sapiens GN=EIF4EBP1 PE=1 SV=3 - [4EBP1_HUMAN]	EIF4EBP1	470.05	51.69	1	6	6	14	118	12.6	5.48	1.257	0.33	5	25.8	1.127	0.172	5	50.7	0.253384	38.25	0.942	-0.086	5	25.7	0.887	-0.173	5	63.5	-0.128945	44.6	1.098	0.135	5	8.9	0.995	-0.007	5	10.4	0.0655723	9.65	0	FALSE	FALSE	TRUE	FALSE	1.162	0.217	5
O60841	Eukaryotic translation initiation factor 5B OS=Homo sapiens GN=EIF5B PE=1 SV=4 - [IF2P_HUMAN]	EIF5B	2054.59	39.75	1	48	48	94	1220	138.7	5.49	1.054	0.076	94	37	1.034	0.048	94	28.2	0.0621217	32.6	0.869	-0.203	94	17.4	0.882	-0.181	94	19.9	-0.191821	18.65	0.912	-0.133	94	22.8	0.931	-0.103	94	16.9	-0.117944	19.85	0	FALSE	FALSE	TRUE	FALSE	0.982	-0.026	94
P55010	Eukaryotic translation initiation factor 5 OS=Homo sapiens GN=EIF5 PE=1 SV=2 - [IF5_HUMAN]	EIF5	1785.72	48.49	1	23	23	75	431	49.2	5.58	1.026	0.037	75	36.3	1.006	0.009	75	34.1	0.0229004	35.2	0.932	-0.102	75	17.8	1.016	0.023	75	24.6	-0.0380063	21.2	1.017	0.024	75	34.3	1.039	0.055	75	29.4	0.0398403	31.85	0	FALSE	FALSE	TRUE	FALSE	0.98	-0.029	75
Q9UI10	Translation initiation factor eIF-2B subunit delta OS=Homo sapiens GN=EIF2B4 PE=1 SV=2 - [EI2BD_HUMAN]	EIF2B4	447.53	16.63	1	7	7	10	523	57.5	9.38	0.883	-0.18	10	7.7	0.87	-0.201	10	20.9	-0.190174	14.3	1.078	0.108	10	13.7	1.189	0.25	10	17.2	0.180784	15.45	1.003	0.004	10	12.8	0.978	-0.032	10	16.9	-0.0137711	14.85	0	FALSE	FALSE	TRUE	FALSE	1.048	0.068	10
P49770	Translation initiation factor eIF-2B subunit beta OS=Homo sapiens GN=EIF2B2 PE=1 SV=3 - [EI2BB_HUMAN]	EIF2B2	632.42	43.02	1	16	16	30	351	39	6.16	0.898	-0.155	30	22.7	0.928	-0.108	30	24.6	-0.131313	23.65	0.943	-0.085	30	18.8	0.981	-0.028	30	15.5	-0.0558912	17.15	0.892	-0.165	30	15.1	0.98	-0.029	30	15.3	-0.0954196	15.2	0	FALSE	FALSE	TRUE	FALSE	0.952	-0.071	30
Q9NR50	Translation initiation factor eIF-2B subunit gamma OS=Homo sapiens GN=EIF2B3 PE=1 SV=1 - [EI2BG_HUMAN]	EIF2B3	455.59	30.97	1	12	12	21	452	50.2	6.47	0.967	-0.048	19	29.2	1.072	0.1	19	18.5	0.0278618	23.85	0.957	-0.063	19	22.2	1.004	0.006	19	31.3	-0.0284105	26.75	0.954	-0.068	19	12.1	0.982	-0.026	19	16.8	-0.046921	14.45	0	FALSE	FALSE	TRUE	FALSE	0.977	-0.034	19
Q14232	Translation initiation factor eIF-2B subunit alpha OS=Homo sapiens GN=EIF2B1 PE=1 SV=1 - [EI2BA_HUMAN]	EIF2B1	753.22	49.84	1	16	16	34	305	33.7	7.33	0.919	-0.122	34	26.1	0.949	-0.076	34	22.6	-0.0985055	24.35	1.029	0.041	34	19.6	1.105	0.144	34	11.9	0.0935602	15.75	1.001	0.001	34	13.5	1.019	0.027	34	20.2	0.0143553	16.85	0	FALSE	FALSE	TRUE	FALSE	0.972	-0.041	34
Q13144	Translation initiation factor eIF-2B subunit epsilon OS=Homo sapiens GN=EIF2B5 PE=1 SV=3 - [EI2BE_HUMAN]	EIF2B5	169.15	9.99	1	5	5	9	721	80.3	5.08	1.015	0.021	9	19.5	1.045	0.064	9	20.2	0.0426443	19.85	0.999	-0.001	9	5.8	1.114	0.156	9	13.1	0.0792928	9.45	1.065	0.091	9	10.7	1.089	0.123	9	14.5	0.107018	12.6	0	FALSE	FALSE	TRUE	FALSE	0.942	-0.086	9
Q04637	Eukaryotic translation initiation factor 4 gamma 1 OS=Homo sapiens GN=EIF4G1 PE=1 SV=4 - [IF4G1_HUMAN]	EIF4G1	3539.4	37.59	1	52	60	178	1599	175.4	5.33	1.028	0.04	140	25.7	0.991	-0.013	140	28.7	0.0136409	27.2	0.806	-0.311	140	23.6	0.798	-0.326	140	24.6	-0.318326	24.1	0.803	-0.317	140	27.2	0.835	-0.26	140	23.3	-0.288065	25.25	5	FALSE	FALSE	TRUE	FALSE	0.977	-0.034	140
P06730	Eukaryotic translation initiation factor 4E OS=Homo sapiens GN=EIF4E PE=1 SV=2 - [IF4E_HUMAN]	EIF4E	499.66	45.62	2	9	10	27	217	25.1	6.15	1.1	0.138	26	14.9	1.092	0.127	26	23.5	0.132248	19.2	0.968	-0.047	26	11.7	1.078	0.108	26	14.6	0.0328061	13.15	1.053	0.075	26	10.3	1.083	0.115	26	16.3	0.0949116	13.3	0	FALSE	FALSE	TRUE	FALSE	0.977	-0.034	26
P83731	60S ribosomal protein L24 OS=Homo sapiens GN=RPL24 PE=1 SV=1 - [RL24_HUMAN]	RPL24	1127.89	50.96	1	14	14	55	157	17.8	11.25	0.81	-0.304	55	21.5	0.839	-0.253	55	20.7	-0.278409	21.1	0.922	-0.117	55	22.3	0.828	-0.272	55	27.6	-0.192645	24.95	0.717	-0.48	55	26.3	0.714	-0.486	55	24.5	-0.482976	25.4	5	FALSE	FALSE	TRUE	FALSE	1.023	0.033	55
P05386	60S acidic ribosomal protein P1 OS=Homo sapiens GN=RPLP1 PE=1 SV=1 - [RLA1_HUMAN]	RPLP1	2219.21	79.82	1	4	4	57	114	11.5	4.32	0.876	-0.191	57	18.3	0.891	-0.167	57	17.6	-0.178698	17.95	0.809	-0.306	57	15.7	0.826	-0.276	57	16.9	-0.290709	16.3	0.71	-0.494	57	18.1	0.766	-0.385	57	17.2	-0.438307	17.65	5	FALSE	FALSE	TRUE	FALSE	0.98	-0.029	57
P84098	60S ribosomal protein L19 OS=Homo sapiens GN=RPL19 PE=1 SV=1 - [RL19_HUMAN]	RPL19	869.17	51.53	4	18	19	52	196	23.5	11.47	0.868	-0.204	51	18.9	0.878	-0.188	51	25.2	-0.195946	22.05	0.95	-0.074	51	20.8	0.911	-0.134	51	25.9	-0.103922	23.35	0.754	-0.407	51	18.5	0.808	-0.308	51	17.1	-0.356606	17.8	4	FALSE	FALSE	TRUE	FALSE	0.984	-0.023	51
P61927	60S ribosomal protein L37 OS=Homo sapiens GN=RPL37 PE=1 SV=2 - [RL37_HUMAN]	RPL37	58.65	31.96	1	4	4	12	97	11.1	11.74	0.982	-0.026	11	14.8	0.896	-0.158	11	8.6	-0.0908029	11.7	0.985	-0.022	11	17.1	0.724	-0.466	11	12.5	-0.226848	14.8	0.963	-0.054	11	21.6	0.608	-0.718	11	11	-0.348317	16.3	5	FALSE	FALSE	TRUE	FALSE	1.169	0.225	11
P62899	60S ribosomal protein L31 OS=Homo sapiens GN=RPL31 PE=1 SV=1 - [RL31_HUMAN]	RPL31	979.6	59.2	1	13	13	52	125	14.5	10.54	0.883	-0.18	52	48.6	0.949	-0.076	52	50.5	-0.12658	49.55	0.86	-0.218	52	20.6	0.802	-0.318	52	23	-0.26708	21.8	0.751	-0.413	52	37.5	0.728	-0.458	52	31.6	-0.435378	34.55	5	FALSE	FALSE	TRUE	FALSE	0.982	-0.026	52
P05387	60S acidic ribosomal protein P2 OS=Homo sapiens GN=RPLP2 PE=1 SV=1 - [RLA2_HUMAN]	RPLP2	3024.04	79.13	1	8	8	93	115	11.7	4.54	0.881	-0.183	93	20.2	0.848	-0.238	93	26.3	-0.210062	23.25	0.825	-0.278	93	19.6	0.893	-0.163	93	22.9	-0.21927	21.25	0.726	-0.462	93	20.7	0.757	-0.402	93	23	-0.431481	21.85	5	FALSE	FALSE	TRUE	FALSE	0.986	-0.02	93
P63173	60S ribosomal protein L38 OS=Homo sapiens GN=RPL38 PE=1 SV=2 - [RL38_HUMAN]	RPL38	577.56	54.29	3	7	8	33	70	8.2	10.1	0.852	-0.231	30	48.3	0.877	-0.189	30	27.5	-0.210062	37.9	0.901	-0.15	30	28.4	0.859	-0.219	30	34.9	-0.184425	31.65	0.713	-0.488	30	22.2	0.731	-0.452	30	19.5	-0.469929	20.85	5	FALSE	FALSE	TRUE	FALSE	1.001	0.001	30
P62917	60S ribosomal protein L8 OS=Homo sapiens GN=RPL8 PE=1 SV=2 - [RL8_HUMAN]	RPL8	1322.66	50.97	1	20	20	69	257	28	11.03	0.933	-0.1	69	23.5	0.961	-0.057	69	27.8	-0.0785637	25.65	0.847	-0.24	69	16.5	0.825	-0.278	69	26.3	-0.258425	21.4	0.757	-0.402	69	20.7	0.828	-0.272	69	23.7	-0.335517	22.2	5	FALSE	FALSE	TRUE	FALSE	0.988	-0.017	69
P47914	60S ribosomal protein L29 OS=Homo sapiens GN=RPL29 PE=1 SV=2 - [RL29_HUMAN]	RPL29	448.91	28.93	1	6	6	23	159	17.7	11.66	0.871	-0.199	23	24.8	0.805	-0.313	23	26.8	-0.254978	25.8	0.903	-0.147	23	24.7	0.882	-0.181	23	17.8	-0.164076	21.25	0.699	-0.517	23	32.9	0.712	-0.49	23	33.1	-0.503282	33	5	FALSE	FALSE	TRUE	FALSE	1.018	0.026	23
P46779	60S ribosomal protein L28 OS=Homo sapiens GN=RPL28 PE=1 SV=3 - [RL28_HUMAN]	RPL28	1334.06	48.18	1	11	12	77	137	15.7	12.02	0.987	-0.019	73	64.6	1.017	0.024	73	59	0.00288251	61.8	0.928	-0.108	73	39.9	0.852	-0.231	73	39.5	-0.168123	39.7	0.826	-0.276	73	29.7	0.784	-0.351	73	20.1	-0.312939	24.9	5	FALSE	FALSE	TRUE	FALSE	1.025	0.036	73
P18077	60S ribosomal protein L35a OS=Homo sapiens GN=RPL35A PE=1 SV=2 - [RL35A_HUMAN]	RPL35A	452.37	61.82	1	12	12	53	110	12.5	11.06	1.052	0.073	53	19.2	1.202	0.265	53	35.2	0.172488	27.2	0.859	-0.219	53	32	0.731	-0.452	53	35	-0.330973	33.5	0.836	-0.258	53	36.8	0.731	-0.452	53	27.2	-0.351995	32	6	FALSE	FALSE	TRUE	FALSE	1.033	0.047	53
P62910	60S ribosomal protein L32 OS=Homo sapiens GN=RPL32 PE=1 SV=2 - [RL32_HUMAN]	RPL32	877.53	56.3	1	12	12	78	135	15.8	11.33	0.964	-0.053	69	19.8	0.928	-0.108	69	20.5	-0.0800879	20.15	0.855	-0.226	69	18.7	0.829	-0.271	69	18	-0.248108	18.35	0.799	-0.324	69	17	0.832	-0.265	69	18.7	-0.294243	17.85	0	FALSE	FALSE	TRUE	FALSE	0.983	-0.025	69
P50914	60S ribosomal protein L14 OS=Homo sapiens GN=RPL14 PE=1 SV=4 - [RL14_HUMAN]	RPL14	872.42	40.93	1	13	13	44	215	23.4	10.93	0.932	-0.102	44	23.4	0.932	-0.102	44	17.5	-0.101598	20.45	0.988	-0.017	44	19.1	0.892	-0.165	44	16.4	-0.0892673	17.75	0.879	-0.186	44	17.7	0.812	-0.3	44	18.8	-0.242123	18.25	0	FALSE	FALSE	TRUE	FALSE	1.085	0.118	44
Q02543	60S ribosomal protein L18a OS=Homo sapiens GN=RPL18A PE=1 SV=2 - [RL18A_HUMAN]	RPL18A	1353.44	57.95	1	17	17	67	176	20.7	10.71	1.096	0.132	67	43.1	0.982	-0.026	67	29	0.0551957	36.05	0.892	-0.165	67	18.7	0.957	-0.063	67	16.7	-0.113255	17.7	0.923	-0.116	67	30.7	0.907	-0.141	67	21.1	-0.128156	25.9	0	FALSE	FALSE	TRUE	FALSE	1.031	0.044	67
P49207	60S ribosomal protein L34 OS=Homo sapiens GN=RPL34 PE=1 SV=3 - [RL34_HUMAN]	RPL34	715.01	43.59	1	9	9	60	117	13.3	11.47	0.863	-0.213	59	13.6	0.815	-0.295	59	17.7	-0.253257	15.65	0.883	-0.18	59	21	0.883	-0.18	59	19.8	-0.179515	20.4	0.698	-0.519	59	25.3	0.745	-0.425	59	21.8	-0.470929	23.55	5	FALSE	FALSE	TRUE	FALSE	0.999	-0.001	59
P46778	60S ribosomal protein L21 OS=Homo sapiens GN=RPL21 PE=1 SV=2 - [RL21_HUMAN]	RPL21	1312.77	55	1	14	14	81	160	18.6	10.49	0.912	-0.133	80	28.5	0.955	-0.066	80	18.4	-0.0992781	23.45	0.913	-0.131	80	17	0.839	-0.253	80	25.3	-0.190997	21.15	0.801	-0.32	80	30.8	0.799	-0.324	80	20.3	-0.321928	25.55	5	FALSE	FALSE	TRUE	FALSE	1.004	0.006	80
P46776	60S ribosomal protein L27a OS=Homo sapiens GN=RPL27A PE=1 SV=2 - [RL27A_HUMAN]	RPL27A	815.84	50.68	1	12	12	45	148	16.6	11	0.958	-0.062	44	38	0.937	-0.094	44	43.7	-0.0778022	40.85	0.851	-0.233	44	22.9	0.814	-0.297	44	17.2	-0.264478	20.05	0.809	-0.306	44	30.3	0.773	-0.371	44	37.5	-0.33825	33.9	5	FALSE	FALSE	TRUE	FALSE	1.013	0.019	44
P83881	60S ribosomal protein L36a OS=Homo sapiens GN=RPL36A PE=1 SV=2 - [RL36A_HUMAN]	RPL36A	261.08	63.21	1	2	10	18	106	12.4	10.58	1.142	0.192	5	35.2	1.183	0.242	5	15.9	0.217231	25.55	0.758	-0.4	5	20.2	0.599	-0.739	5	9.6	-0.559579	14.9	0.943	-0.085	5	0.4	0.839	-0.253	5	27.6	-0.166503	14	6	FALSE	FALSE	TRUE	FALSE	0.963	-0.054	5
P62891	60S ribosomal protein L39 OS=Homo sapiens GN=RPL39 PE=1 SV=2 - [RL39_HUMAN]	RPL39	38.04	19.61	2	1	1	2	51	6.4	12.56	0.75	-0.415	2	26	0.756	-0.404	2	18.2	-0.409278	22.1	0.977	-0.034	2	11.3	0.967	-0.048	2	13.8	-0.0409718	12.55	0.727	-0.46	2	14.4	0.727	-0.46	2	32.7	-0.459973	23.55		FALSE	FALSE	FALSE		1.056	0.079	2
Q9UNX3	60S ribosomal protein L26-like 1 OS=Homo sapiens GN=RPL26L1 PE=1 SV=1 - [RL26L_HUMAN]	RPL26L1	325	47.59	1	3	13	35	145	17.2	10.55	1.408	0.494	3	13.1	1.347	0.43	3	61.6	0.462052	37.35	0.873	-0.196	3	7	0.804	-0.315	3	47	-0.254117	27	1.218	0.285	3	6.1	1.078	0.108	3	12.1	0.199123	9.1	3	FALSE	FALSE	TRUE	FALSE	0.945	-0.082	3
Q9Y3U8	60S ribosomal protein L36 OS=Homo sapiens GN=RPL36 PE=1 SV=3 - [RL36_HUMAN]	RPL36	266.41	46.67	1	9	10	26	105	12.2	11.59	0.801	-0.32	21	14.6	0.868	-0.204	21	17	-0.261016	15.8	0.836	-0.258	21	15.3	0.878	-0.188	21	16.5	-0.222633	15.9	0.704	-0.506	21	19.1	0.74	-0.434	21	20.8	-0.469929	19.95	5	FALSE	FALSE	TRUE	FALSE	1.006	0.009	21
P30050	60S ribosomal protein L12 OS=Homo sapiens GN=RPL12 PE=1 SV=1 - [RL12_HUMAN]	RPL12	1905.42	78.18	1	16	16	102	165	17.8	9.42	0.917	-0.125	102	16.9	0.919	-0.122	102	20.1	-0.123434	18.5	0.877	-0.189	102	18.3	0.853	-0.229	102	17.6	-0.209228	17.95	0.756	-0.404	102	21	0.766	-0.385	102	19.7	-0.394032	20.35	5	FALSE	FALSE	TRUE	FALSE	0.987	-0.019	102
P42766	60S ribosomal protein L35 OS=Homo sapiens GN=RPL35 PE=1 SV=2 - [RL35_HUMAN]	RPL35	286.24	43.9	3	7	9	20	123	14.5	11.05	0.866	-0.208	18	25.1	0.91	-0.136	18	26.7	-0.171368	25.9	0.948	-0.077	18	22.6	0.732	-0.45	18	40.6	-0.251539	31.6	0.764	-0.388	18	33	0.702	-0.51	18	20.4	-0.448115	26.7	5	FALSE	FALSE	TRUE	FALSE	1.018	0.026	18
P61254	60S ribosomal protein L26 OS=Homo sapiens GN=RPL26 PE=1 SV=1 - [RL26_HUMAN]	RPL26	374.93	47.59	1	5	15	40	145	17.2	10.55	1.28	0.356	8	41.4	1.111	0.152	8	38.4	0.257614	39.9	0.907	-0.141	8	63.1	0.619	-0.692	8	17.1	-0.390245	40.1	0.787	-0.346	8	33.3	0.724	-0.466	8	29.1	-0.404496	31.2	6	FALSE	FALSE	TRUE	FALSE	1.007	0.01	8
P62829	60S ribosomal protein L23 OS=Homo sapiens GN=RPL23 PE=1 SV=1 - [RL23_HUMAN]	RPL23	892.03	77.86	1	12	12	52	140	14.9	10.51	0.794	-0.333	52	11.2	0.871	-0.199	52	14.7	-0.264478	12.95	0.943	-0.085	52	17.5	0.857	-0.223	52	23.7	-0.152003	20.6	0.775	-0.368	52	20.2	0.754	-0.407	52	14.5	-0.387412	17.35	4	FALSE	FALSE	TRUE	FALSE	1.031	0.044	52
P62913	60S ribosomal protein L11 OS=Homo sapiens GN=RPL11 PE=1 SV=2 - [RL11_HUMAN]	RPL11	613.42	56.18	1	11	11	35	178	20.2	9.6	0.954	-0.068	35	27.1	0.95	-0.074	35	28.2	-0.0709665	27.65	0.779	-0.36	35	27	0.707	-0.5	35	37.1	-0.428566	32.05	0.741	-0.432	35	27.8	0.746	-0.423	35	26.6	-0.427595	27.2	5	FALSE	FALSE	TRUE	FALSE	1	0	35
P35268	60S ribosomal protein L22 OS=Homo sapiens GN=RPL22 PE=1 SV=2 - [RL22_HUMAN]	RPL22	1921.86	65.63	1	9	10	51	128	14.8	9.19	0.899	-0.154	50	27.6	0.971	-0.042	50	16.6	-0.0969617	22.1	0.922	-0.117	50	27.5	0.876	-0.191	50	23.6	-0.153607	25.55	0.817	-0.292	50	21.2	0.82	-0.286	50	22.9	-0.288946	22.05	0	FALSE	FALSE	TRUE	FALSE	1.003	0.004	50
P62906	60S ribosomal protein L10a OS=Homo sapiens GN=RPL10A PE=1 SV=2 - [RL10A_HUMAN]	RPL10A	2141.92	55.76	1	18	18	91	217	24.8	9.94	0.883	-0.18	91	14.2	0.859	-0.219	91	14.4	-0.199255	14.3	0.912	-0.133	91	17.4	0.912	-0.133	91	21	-0.132894	19.2	0.786	-0.347	91	16.3	0.813	-0.299	91	22.3	-0.32283	19.3	4	FALSE	FALSE	TRUE	FALSE	1.022	0.031	91
P18621	60S ribosomal protein L17 OS=Homo sapiens GN=RPL17 PE=1 SV=3 - [RL17_HUMAN]	RPL17	1729.05	64.13	1	13	15	114	184	21.4	10.17	0.927	-0.109	107	26.4	0.941	-0.088	107	38.6	-0.0985055	32.5	0.871	-0.199	107	17.4	0.818	-0.29	107	29	-0.243831	23.2	0.769	-0.379	107	26	0.778	-0.362	107	19.3	-0.370527	22.65	5	FALSE	FALSE	TRUE	FALSE	1.009	0.013	107
P61513	60S ribosomal protein L37a OS=Homo sapiens GN=RPL37A PE=1 SV=2 - [RL37A_HUMAN]	RPL37A	415.6	63.04	2	7	7	28	92	10.3	10.43	0.893	-0.163	21	9	0.917	-0.125	21	17.7	-0.14401	13.35	0.854	-0.228	21	17.6	0.799	-0.324	21	44	-0.274913	30.8	0.712	-0.49	21	15.9	0.755	-0.405	21	16.1	-0.447131	16	5	FALSE	FALSE	TRUE	FALSE	1.044	0.062	21
P61353	60S ribosomal protein L27 OS=Homo sapiens GN=RPL27 PE=1 SV=2 - [RL27_HUMAN]	RPL27	310.41	55.88	1	9	9	35	136	15.8	10.56	0.904	-0.146	35	35.2	1.044	0.062	35	34	-0.0380063	34.6	0.811	-0.302	35	18.6	0.817	-0.292	35	31.5	-0.296899	25.05	0.821	-0.285	35	29.9	0.837	-0.257	35	20.8	-0.270556	25.35	0	FALSE	FALSE	TRUE	FALSE	1.019	0.027	35
P32969	60S ribosomal protein L9 OS=Homo sapiens GN=RPL9 PE=1 SV=1 - [RL9_HUMAN]	RPL9	1401.38	56.77	1	10	10	47	192	21.8	9.95	0.868	-0.204	47	20.7	0.939	-0.091	47	15.8	-0.146403	18.25	0.854	-0.228	47	16.2	0.783	-0.353	47	16.7	-0.288946	16.45	0.754	-0.407	47	9	0.747	-0.421	47	20.2	-0.414076	14.6	5	FALSE	FALSE	TRUE	FALSE	1.007	0.01	47
P62888	60S ribosomal protein L30 OS=Homo sapiens GN=RPL30 PE=1 SV=2 - [RL30_HUMAN]	RPL30	1572.94	81.74	1	12	13	77	115	12.8	9.63	0.942	-0.086	73	16.7	0.935	-0.097	73	21.5	-0.0915713	19.1	0.842	-0.248	73	26.2	0.882	-0.181	73	24.6	-0.21424	25.4	0.774	-0.37	73	24.6	0.785	-0.349	73	21.7	-0.359379	23.15	5	FALSE	FALSE	TRUE	FALSE	0.988	-0.017	73
P61313	60S ribosomal protein L15 OS=Homo sapiens GN=RPL15 PE=1 SV=2 - [RL15_HUMAN]	RPL15	686.24	48.53	1	13	13	38	204	24.1	11.62	0.978	-0.032	38	23.1	1.091	0.126	38	35.1	0.0489336	29.1	0.835	-0.26	38	15.7	0.858	-0.221	38	13.8	-0.240418	14.75	0.797	-0.327	38	28.2	0.932	-0.102	38	23.8	-0.210062	26	0	FALSE	FALSE	TRUE	FALSE	0.979	-0.031	38
Q969Q0	60S ribosomal protein L36a-like OS=Homo sapiens GN=RPL36AL PE=1 SV=3 - [RL36L_HUMAN]	RPL36AL	263.17	64.15	1	3	11	18	106	12.5	10.65	1.469	0.555	5	14.4	1.304	0.383	5	21.3	0.471448	17.85	0.796	-0.329	5	16.5	0.833	-0.264	5	23.7	-0.296013	20.1	1.156	0.209	5	1.7	1.024	0.034	5	6.6	0.124328	4.15	6	FALSE	FALSE	TRUE	FALSE	1.092	0.127	5
Q96L21	60S ribosomal protein L10-like OS=Homo sapiens GN=RPL10L PE=1 SV=3 - [RL10L_HUMAN]	RPL10L	446.08	32.24	1	1	10	35	214	24.5	10.01	0.953	-0.069	1	NA	0.897	-0.157	1	NA	-0.112475	NA	0.871	-0.199	1	NA	0.857	-0.223	1	NA	-0.210897	NA	0.823	-0.281	1	NA	0.765	-0.386	1	NA	-0.332789	NA		FALSE	FALSE	FALSE		1.024	0.034	1
P27635	60S ribosomal protein L10 OS=Homo sapiens GN=RPL10 PE=1 SV=4 - [RL10_HUMAN]	RPL10	2487.43	58.88	1	11	20	89	214	24.6	10.08	1.007	0.01	55	16.8	1.085	0.118	55	25.4	0.0648829	21.1	0.807	-0.309	55	20.5	0.797	-0.327	55	28.4	-0.318326	24.45	0.789	-0.342	55	22.3	0.832	-0.265	55	23.3	-0.303116	22.8	6	FALSE	FALSE	TRUE	FALSE	0.945	-0.082	55
P18124	60S ribosomal protein L7 OS=Homo sapiens GN=RPL7 PE=1 SV=1 - [RL7_HUMAN]	RPL7	1938.3	64.52	2	25	26	130	248	29.2	10.65	0.89	-0.168	123	22.4	0.927	-0.109	123	19.6	-0.138442	21	0.915	-0.128	123	12.2	0.876	-0.191	123	14.7	-0.159235	13.45	0.813	-0.299	123	16.6	0.807	-0.309	123	16.6	-0.304006	16.6	5	FALSE	FALSE	TRUE	FALSE	1.007	0.01	123
P62750	60S ribosomal protein L23a OS=Homo sapiens GN=RPL23A PE=1 SV=1 - [RL23A_HUMAN]	RPL23A	1462.79	59.62	1	16	16	70	156	17.7	10.45	0.873	-0.196	70	23.7	0.859	-0.219	70	20.2	-0.207561	21.95	0.835	-0.26	70	20.7	0.801	-0.32	70	26.2	-0.289827	23.45	0.734	-0.446	70	21.2	0.745	-0.425	70	24.6	-0.435378	22.9	5	FALSE	FALSE	TRUE	FALSE	1.028	0.04	70
P39023	60S ribosomal protein L3 OS=Homo sapiens GN=RPL3 PE=1 SV=2 - [RL3_HUMAN]	RPL3	3506.88	59.06	2	34	34	159	403	46.1	10.18	0.973	-0.039	159	22.7	0.964	-0.053	159	25.2	-0.046176	23.95	0.868	-0.204	159	20	0.862	-0.214	159	20.8	-0.209228	20.4	0.82	-0.286	159	24.9	0.865	-0.209	159	19.5	-0.247251	22.2	0	FALSE	FALSE	TRUE	FALSE	1.002	0.003	159
P40429	60S ribosomal protein L13a OS=Homo sapiens GN=RPL13A PE=1 SV=2 - [RL13A_HUMAN]	RPL13A	1653.08	65.02	2	22	22	119	203	23.6	10.93	0.914	-0.13	113	29.9	0.951	-0.072	113	34.4	-0.100824	32.15	0.916	-0.127	113	25.6	0.904	-0.146	113	24.4	-0.136062	25	0.818	-0.29	113	17	0.819	-0.288	113	16.1	-0.288946	16.55	0	FALSE	FALSE	TRUE	FALSE	1	0	113
P62424	60S ribosomal protein L7a OS=Homo sapiens GN=RPL7A PE=1 SV=2 - [RL7A_HUMAN]	RPL7A	2909.54	58.65	1	28	29	155	266	30	10.61	0.995	-0.007	143	25.1	0.993	-0.01	143	24.6	-0.00868224	24.85	0.846	-0.241	143	20	0.855	-0.226	143	26.9	-0.233617	23.45	0.77	-0.377	143	22.9	0.781	-0.357	143	24.9	-0.366801	23.9	5	FALSE	FALSE	TRUE	FALSE	0.992	-0.012	143
P36578	60S ribosomal protein L4 OS=Homo sapiens GN=RPL4 PE=1 SV=5 - [RL4_HUMAN]	RPL4	4132.28	63.23	1	35	35	180	427	47.7	11.06	0.907	-0.141	180	21.2	0.939	-0.091	180	24	-0.115597	22.6	0.903	-0.147	180	19.5	0.877	-0.189	180	21.4	-0.168123	20.45	0.799	-0.324	180	18.8	0.841	-0.25	180	22.5	-0.286304	20.65	0	FALSE	FALSE	TRUE	FALSE	1.005	0.007	180
P26373	60S ribosomal protein L13 OS=Homo sapiens GN=RPL13 PE=1 SV=4 - [RL13_HUMAN]	RPL13	1495.67	54.03	1	20	20	92	211	24.2	11.65	0.866	-0.208	90	33.1	0.859	-0.219	90	25.8	-0.213404	29.45	0.936	-0.095	90	21.9	0.883	-0.18	90	23.9	-0.136854	22.9	0.753	-0.409	90	34.8	0.717	-0.48	90	31.5	-0.444184	33.15	5	FALSE	FALSE	TRUE	FALSE	1.026	0.037	90
Q07020	60S ribosomal protein L18 OS=Homo sapiens GN=RPL18 PE=1 SV=2 - [RL18_HUMAN]	RPL18	2251.15	51.06	1	11	11	92	188	21.6	11.72	0.866	-0.208	84	16.3	0.906	-0.142	84	24.6	-0.174621	20.45	0.891	-0.167	84	13.5	0.856	-0.224	84	17.9	-0.19512	15.7	0.766	-0.385	84	18.6	0.799	-0.324	84	21	-0.353837	19.8	5	FALSE	FALSE	TRUE	FALSE	1.002	0.003	84
P46777	60S ribosomal protein L5 OS=Homo sapiens GN=RPL5 PE=1 SV=3 - [RL5_HUMAN]	RPL5	4124.53	70.37	1	27	27	169	297	34.3	9.72	0.844	-0.245	165	14.5	0.908	-0.139	164	14.5	-0.190997	14.5	0.842	-0.248	165	14.8	0.876	-0.191	164	22.5	-0.21927	18.65	0.677	-0.563	165	17.3	0.75	-0.415	165	23.2	-0.487015	20.25	5	FALSE	FALSE	TRUE	FALSE	0.971	-0.042	165
Q02878	60S ribosomal protein L6 OS=Homo sapiens GN=RPL6 PE=1 SV=3 - [RL6_HUMAN]	RPL6	1223.31	47.22	1	18	18	82	288	32.7	10.58	1.01	0.014	82	34	1.042	0.059	82	34.6	0.0370307	34.3	0.825	-0.278	82	27	0.838	-0.255	82	26.3	-0.266212	26.65	0.781	-0.357	82	18.3	0.831	-0.267	82	20.3	-0.311148	19.3	5	FALSE	FALSE	TRUE	FALSE	0.982	-0.026	82
Q6P5R6	60S ribosomal protein L22-like 1 OS=Homo sapiens GN=RPL22L1 PE=1 SV=2 - [RL22L_HUMAN]	RPL22L1	72.18	27.87	1	2	3	3	122	14.6	9.38	0.97	-0.044	2	9.1	0.872	-0.198	2	15.8	-0.118727	12.45	0.74	-0.434	2	33.3	0.902	-0.149	2	71.4	-0.284546	52.35	0.711	-0.492	2	43.4	0.783	-0.353	2	51.5	-0.42082	47.45		FALSE	FALSE	FALSE		0.97	-0.044	2
P11940	Polyadenylate-binding protein 1 OS=Homo sapiens GN=PABPC1 PE=1 SV=2 - [PABP1_HUMAN]	PABPC1	2445.73	61.64	4	28	40	117	636	70.6	9.5	1.049	0.069	91	16	0.965	-0.051	91	19.3	0.0100637	17.65	0.756	-0.404	91	24.7	0.805	-0.313	91	24.3	-0.357529	24.5	0.787	-0.346	91	22.2	0.795	-0.331	91	20.9	-0.33825	21.55	5	FALSE	FALSE	TRUE	FALSE	0.99	-0.014	91
Q8NG68	Tubulin--tyrosine ligase OS=Homo sapiens GN=TTL PE=1 SV=2 - [TTL_HUMAN]	TTL	154.5	23.61	1	6	6	8	377	43.2	6.74	0.864	-0.211	8	15.7	0.968	-0.047	8	17.1	-0.12658	16.4	1.093	0.128	8	11.1	0.973	-0.039	8	12.7	0.0468403	11.9	0.937	-0.094	8	13.5	0.923	-0.116	8	11.2	-0.104697	12.35	0	FALSE	FALSE	TRUE	FALSE	1.013	0.019	8
Q6ZTW0	Tubulin polyglutamylase complex subunit 1 OS=Homo sapiens GN=TPGS1 PE=1 SV=2 - [TPGS1_HUMAN]	TPGS1	42.11	2.76	1	1	1	1	290	31.3	9.06	0.836	-0.258	1	NA	1.092	0.127	1	NA	-0.0528949	NA	0.867	-0.206	1	NA	0.74	-0.434	1	NA	-0.31563	NA	0.718	-0.478	1	NA	0.805	-0.313	1	NA	-0.393084	NA		FALSE	FALSE	FALSE		0.956	-0.065	1
Q8IUZ0	Leucine-rich repeat-containing protein 49 OS=Homo sapiens GN=LRRC49 PE=2 SV=2 - [LRC49_HUMAN]	LRRC49	48.92	1.31	1	1	1	1	686	78.8	7.87	1.248	0.32	1	NA	0.782	-0.355	1	NA	0.0214797	NA	0.922	-0.117	1	NA	1.085	0.118	1	NA	0.00504062	NA	1.141	0.19	1	NA	0.844	-0.245	1	NA	-0.010861	NA		FALSE	FALSE	FALSE		1.356	0.439	1
Q68CL5	Tubulin polyglutamylase complex subunit 2 OS=Homo sapiens GN=TPGS2 PE=2 SV=2 - [TPGS2_HUMAN]	TPGS2	112.58	5	1	1	1	1	300	33.3	6.73	1.202	0.265	1	NA	1.278	0.354	1	NA	0.31034	NA	0.981	-0.028	1	NA	0.977	-0.034	1	NA	-0.0306192	NA	1.169	0.225	1	NA	1.242	0.313	1	NA	0.269632	NA		FALSE	FALSE	FALSE		0.914	-0.13	1
Q14679	Tubulin polyglutamylase TTLL4 OS=Homo sapiens GN=TTLL4 PE=1 SV=2 - [TTLL4_HUMAN]	TTLL4	38.46	1.33	1	1	1	1	1199	133.3	8.85	0.732	-0.45	1	NA	0.68	-0.556	1	NA	-0.50226	NA	0.717	-0.48	1	NA	0.816	-0.293	1	NA	-0.383642	NA	0.52	-0.943	1	NA	0.552	-0.857	1	NA	-0.899695	NA		FALSE	FALSE	FALSE		1.078	0.108	1
Q14166	Tubulin--tyrosine ligase-like protein 12 OS=Homo sapiens GN=TTLL12 PE=1 SV=2 - [TTL12_HUMAN]	TTLL12	1007.31	43.48	1	19	19	34	644	74.4	5.53	0.957	-0.063	31	16.5	1.013	0.019	31	27.5	-0.0218044	22	0.972	-0.041	31	19.4	1.031	0.044	31	14.6	0.00216242	17	0.986	-0.02	31	17.5	1.042	0.059	31	16.4	0.0200577	16.95	0	FALSE	FALSE	TRUE	FALSE	0.923	-0.116	31
Q9BSH3	Nicolin-1 OS=Homo sapiens GN=NICN1 PE=2 SV=1 - [NICN1_HUMAN]	NICN1	53.2	5.16	1	1	1	1	213	24.2	7.06	0.946	-0.08	1	NA	0.868	-0.204	1	NA	-0.140826	NA	1.164	0.219	1	NA	1.316	0.396	1	NA	0.31034	NA	1.092	0.127	1	NA	1.136	0.184	1	NA	0.155749	NA		FALSE	FALSE	FALSE		1.01	0.014	1
Q9UPW5	Cytosolic carboxypeptidase 1 OS=Homo sapiens GN=AGTPBP1 PE=1 SV=3 - [CBPC1_HUMAN]	AGTPBP1	155.79	4.98	1	6	6	9	1226	138.4	6.15	1.166	0.222	9	21	1.069	0.096	9	24.1	0.160275	22.55	1.205	0.269	9	18.1	1.321	0.402	9	9.9	0.336855	14	1.361	0.445	9	24.5	1.468	0.554	9	17.4	0.500292	20.95	1	FALSE	FALSE	TRUE	FALSE	0.97	-0.044	9
P13637	Sodium/potassium-transporting ATPase subunit alpha-3 OS=Homo sapiens GN=ATP1A3 PE=1 SV=3 - [AT1A3_HUMAN]	ATP1A3	3351.11	41.16	1	20	37	110	1013	111.7	5.38	1.214	0.28	34	39.7	1.094	0.13	34	25.4	0.206643	32.55	2.191	1.132	34	43.6	2.406	1.267	34	54.7	1.20069	49.15	3.119	1.641	34	69.7	2.658	1.41	34	62.3	1.53032	66	2	FALSE	FALSE	TRUE	FALSE	1.113	0.154	34
P05023	Sodium/potassium-transporting ATPase subunit alpha-1 OS=Homo sapiens GN=ATP1A1 PE=1 SV=1 - [AT1A1_HUMAN]	ATP1A1	5333.87	45.75	1	32	49	185	1023	112.8	5.49	0.981	-0.028	110	19.9	1.063	0.088	110	24.6	0.0313952	22.25	0.97	-0.044	110	14.6	0.942	-0.086	110	24.6	-0.0649175	19.6	0.942	-0.086	110	20	1.009	0.013	110	22.4	-0.0357862	21.2	0	FALSE	FALSE	TRUE	FALSE	0.974	-0.038	110
Q9H0Q3	FXYD domain-containing ion transport regulator 6 OS=Homo sapiens GN=FXYD6 PE=1 SV=1 - [FXYD6_HUMAN]	FXYD6	58.98	26.32	1	1	1	1	95	10.5	5.1	1.059	0.083	1	NA	1.197	0.259	1	NA	0.173767	NA	1.65	0.722	1	NA	1.453	0.539	1	NA	0.633664	NA	1.732	0.792	1	NA	1.73	0.791	1	NA	0.791606	NA		FALSE	FALSE	FALSE		0.965	-0.051	1
Q12797	Aspartyl/asparaginyl beta-hydroxylase OS=Homo sapiens GN=ASPH PE=1 SV=3 - [ASPH_HUMAN]	ASPH	1045.06	19.92	2	14	14	25	758	85.8	5.01	0.96	-0.059	25	33.6	1.37	0.454	25	13.9	0.22033	23.75	1.145	0.195	25	20	0.699	-0.517	25	22.2	-0.117161	21.1	1.057	0.08	25	25.6	1.015	0.021	25	23.9	0.051024	24.75		FALSE	FALSE	TRUE	TRUE	1.083	0.115	25
P68106	Peptidyl-prolyl cis-trans isomerase FKBP1B OS=Homo sapiens GN=FKBP1B PE=1 SV=2 - [FKB1B_HUMAN]	FKBP1B	54.53	12.04	1	1	1	1	108	11.8	8.47	1.619	0.695	1	NA	1.561	0.642	1	NA	0.669027	NA	1.093	0.128	1	NA	1.164	0.219	1	NA	0.174406	NA	1.754	0.811	1	NA	1.808	0.854	1	NA	0.832688	NA		FALSE	FALSE	FALSE		1.007	0.01	1
P54289	Voltage-dependent calcium channel subunit alpha-2/delta-1 OS=Homo sapiens GN=CACNA2D1 PE=1 SV=3 - [CA2D1_HUMAN]	CACNA2D1	85.89	5.53	1	4	4	6	1103	124.5	5.27	1.053	0.075	6	7.4	0.971	-0.042	6	18	0.0172093	12.7	1.07	0.098	6	7	1.133	0.18	6	10.8	0.139469	8.9	1.066	0.092	6	6.5	1.212	0.277	6	17.1	0.187768	11.8	0	FALSE	FALSE	TRUE	FALSE	0.978	-0.032	6
P49189	4-trimethylaminobutyraldehyde dehydrogenase OS=Homo sapiens GN=ALDH9A1 PE=1 SV=3 - [AL9A1_HUMAN]	ALDH9A1	1395.27	36.64	1	21	21	59	494	53.8	5.87	0.957	-0.063	56	18.8	1.02	0.029	56	19.7	-0.0166871	19.25	1.029	0.041	56	13.1	1.073	0.102	56	17.3	0.0717627	15.2	1.003	0.004	56	18.6	1.047	0.066	56	19	0.0356239	18.8	0	FALSE	FALSE	TRUE	FALSE	0.971	-0.042	56
Q9NVH6	Trimethyllysine dioxygenase, mitochondrial OS=Homo sapiens GN=TMLHE PE=1 SV=1 - [TMLH_HUMAN]	TMLHE	30.83	1.9	1	1	1	1	421	49.5	7.72	1.245	0.316	1	NA	1.133	0.18	1	NA	0.249749	NA	0.945	-0.082	1	NA	0.977	-0.034	1	NA	-0.0573917	NA	1.166	0.222	1	NA	1.102	0.14	1	NA	0.181421	NA		FALSE	FALSE	FALSE		0.964	-0.053	1
P34896	Serine hydroxymethyltransferase, cytosolic OS=Homo sapiens GN=SHMT1 PE=1 SV=1 - [GLYC_HUMAN]	SHMT1	775.2	28.99	1	12	13	30	483	53	7.71	1.124	0.169	26	30.6	1.114	0.156	26	33.6	0.16221	32.1	0.806	-0.311	26	16.6	0.908	-0.139	26	20	-0.222633	18.3	0.891	-0.167	26	25.9	0.902	-0.149	26	21.6	-0.157625	23.75	0	FALSE	FALSE	TRUE	FALSE	0.946	-0.08	26
P07101	Tyrosine 3-monooxygenase OS=Homo sapiens GN=TH PE=1 SV=5 - [TY3H_HUMAN]	TH	117.63	10.8	1	5	5	7	528	58.6	6.3	1.871	0.904	7	41.5	1.797	0.846	7	48.4	0.874994	44.95	0.971	-0.042	7	11.1	1.015	0.021	7	14.4	-0.0101344	12.75	1.78	0.832	7	43.2	1.478	0.564	7	68.8	0.703987	56	3	FALSE	FALSE	TRUE	FALSE	1.115	0.157	7
O75914	Serine/threonine-protein kinase PAK 3 OS=Homo sapiens GN=PAK3 PE=1 SV=2 - [PAK3_HUMAN]	PAK3	1297.61	35.24	1	6	20	52	559	62.3	5.45	1.214	0.28	8	28.2	1.144	0.194	8	23.6	0.237564	25.9	2.208	1.143	8	16.3	2.54	1.345	8	11.1	1.24732	13.7	2.509	1.327	8	31.5	2.729	1.448	8	34.5	1.38902	33	2	FALSE	FALSE	TRUE	FALSE	1.044	0.062	8
P07947	Tyrosine-protein kinase Yes OS=Homo sapiens GN=YES1 PE=1 SV=3 - [YES_HUMAN]	YES1	470.64	20.63	9	5	10	20	543	60.8	6.74	1.297	0.375	7	12.8	1.276	0.352	7	24.1	0.363451	18.45	0.988	-0.017	7	11.5	1.008	0.011	7	9.4	-0.00288828	10.45	1.365	0.449	7	27.2	1.409	0.495	7	21.1	0.471968	24.15	3	FALSE	FALSE	TRUE	FALSE	1.003	0.004	7
P42345	Serine/threonine-protein kinase mTOR OS=Homo sapiens GN=MTOR PE=1 SV=1 - [MTOR_HUMAN]	MTOR	775.68	12.51	2	23	24	30	2549	288.7	7.17	1.025	0.036	29	24.3	0.974	-0.038	29	20.6	-0.000721528	22.45	1.099	0.136	29	12.3	1.139	0.188	29	10.2	0.16221	11.25	1.098	0.135	29	13.8	1.1	0.138	29	20	0.136191	16.9	0	FALSE	FALSE	TRUE	FALSE	1	0	29
Q9BVC4	Target of rapamycin complex subunit LST8 OS=Homo sapiens GN=MLST8 PE=1 SV=1 - [LST8_HUMAN]	MLST8	188.46	11.66	1	2	2	5	326	35.9	5.86	0.796	-0.329	5	6.9	0.819	-0.288	5	9.7	-0.308466	8.3	1.163	0.218	5	4.2	1.242	0.313	5	8.6	0.266037	6.4	0.908	-0.139	5	21.8	1.07	0.098	5	17	-0.0159576	19.4	4	FALSE	FALSE	TRUE	FALSE	0.935	-0.097	5
Q6R327	Rapamycin-insensitive companion of mTOR OS=Homo sapiens GN=RICTOR PE=1 SV=1 - [RICTR_HUMAN]	RICTOR	54.64	1.87	1	4	4	5	1708	192.1	7.47	1.222	0.289	5	36.5	1.128	0.174	5	53.5	0.232661	45	1.063	0.088	5	31.6	1.035	0.05	5	5.5	0.0690147	18.55	1.465	0.551	5	2.4	1.172	0.229	5	24.1	0.398898	13.25	3	FALSE	FALSE	TRUE	FALSE	1.01	0.014	5
Q9BPZ7	Target of rapamycin complex 2 subunit MAPKAP1 OS=Homo sapiens GN=MAPKAP1 PE=1 SV=2 - [SIN1_HUMAN]	MAPKAP1	112.17	4.79	1	2	2	3	522	59.1	7.55	0.976	-0.035	1	NA	1.002	0.003	1	NA	-0.0159576	NA	1.028	0.04	1	NA	1.056	0.079	1	NA	0.0593553	NA	0.994	-0.009	1	NA	1.053	0.075	1	NA	0.0335111	NA		FALSE	FALSE	FALSE		1.079	0.11	1
Q5T1C6	Acyl-coenzyme A thioesterase THEM4 OS=Homo sapiens GN=THEM4 PE=1 SV=1 - [THEM4_HUMAN]	THEM4	52.47	9.58	1	2	2	2	240	27.1	8.28	0.927	-0.109	2	29.3	1.023	0.033	2	32.5	-0.0365259	30.9	1.116	0.158	2	16.9	1.117	0.16	2	3	0.158983	9.95	1.025	0.036	2	12	1.137	0.185	2	35.8	0.112367	23.9		FALSE	FALSE	FALSE		0.961	-0.057	2
Q13309	S-phase kinase-associated protein 2 OS=Homo sapiens GN=SKP2 PE=1 SV=2 - [SKP2_HUMAN]	SKP2	97.75	12.5	1	5	5	7	424	47.7	7.11	0.824	-0.279	7	12.6	0.785	-0.349	7	13.7	-0.313836	13.15	0.748	-0.419	7	8.7	0.837	-0.257	7	10.6	-0.335517	9.65	0.665	-0.589	7	16.1	0.721	-0.472	7	29.8	-0.529073	22.95	5	FALSE	FALSE	TRUE	FALSE	0.948	-0.077	7
O14965	Aurora kinase A OS=Homo sapiens GN=AURKA PE=1 SV=2 - [AURKA_HUMAN]	AURKA	105.74	8.19	1	5	5	6	403	45.8	9.39	0.923	-0.116	6	26.6	0.802	-0.318	6	19.5	-0.213404	23.05	0.799	-0.324	6	18.6	0.762	-0.392	6	8.7	-0.357529	13.65	0.694	-0.527	6	22.8	0.601	-0.735	6	13.5	-0.627048	18.15	5	FALSE	FALSE	TRUE	FALSE	1.036	0.051	6
O60566	Mitotic checkpoint serine/threonine-protein kinase BUB1 beta OS=Homo sapiens GN=BUB1B PE=1 SV=3 - [BUB1B_HUMAN]	BUB1B	375.63	22	1	16	16	18	1050	119.5	5.27	0.879	-0.186	18	24	0.878	-0.188	18	17.2	-0.186886	20.6	0.753	-0.409	18	12.8	0.803	-0.317	18	17	-0.362158	14.9	0.655	-0.61	18	34.6	0.682	-0.552	18	27.3	-0.581001	30.95	5	FALSE	FALSE	TRUE	FALSE	0.955	-0.066	18
O43684	Mitotic checkpoint protein BUB3 OS=Homo sapiens GN=BUB3 PE=1 SV=1 - [BUB3_HUMAN]	BUB3	1699.38	55.49	1	18	18	57	328	37.1	6.84	0.879	-0.186	57	12.1	0.853	-0.229	57	17	-0.207561	14.55	0.893	-0.163	57	15.6	0.955	-0.066	57	19.6	-0.114035	17.6	0.791	-0.338	57	17.4	0.792	-0.336	57	16.4	-0.337339	16.9	4	FALSE	FALSE	TRUE	FALSE	0.982	-0.026	57
Q13257	Mitotic spindle assembly checkpoint protein MAD2A OS=Homo sapiens GN=MAD2L1 PE=1 SV=1 - [MD2L1_HUMAN]	MAD2L1	248.37	32.68	1	7	7	15	205	23.5	5.08	0.822	-0.283	15	44.1	0.785	-0.349	15	30.2	-0.31563	37.15	0.804	-0.315	15	20.4	0.938	-0.092	15	22.4	-0.199255	21.4	0.655	-0.61	15	47.6	0.698	-0.519	15	22.1	-0.563838	34.85	5	FALSE	FALSE	TRUE	FALSE	0.938	-0.092	15
Q96DE5	Anaphase-promoting complex subunit 16 OS=Homo sapiens GN=ANAPC16 PE=1 SV=1 - [APC16_HUMAN]	ANAPC16	142.6	52.73	1	3	3	4	110	11.7	4.97	1.123	0.167	4	10.2	1.062	0.087	4	5.8	0.127633	8	0.834	-0.262	4	6.8	0.998	-0.003	4	7.5	-0.12658	7.15	0.92	-0.12	4	18.4	1.089	0.123	4	6	0.00647756	12.2	0	FALSE	FALSE	TRUE	FALSE	0.905	-0.144	4
Q96GD4	Aurora kinase B OS=Homo sapiens GN=AURKB PE=1 SV=3 - [AURKB_HUMAN]	AURKB	184.77	13.66	1	4	4	7	344	39.3	9.29	0.842	-0.248	7	7.2	0.827	-0.274	7	14.8	-0.261016	11	0.763	-0.39	7	9.9	0.635	-0.655	7	20.5	-0.516636	15.2	0.616	-0.699	7	16.6	0.53	-0.916	7	33.9	-0.803393	25.25	5	FALSE	FALSE	TRUE	FALSE	0.948	-0.077	7
P55735	Protein SEC13 homolog OS=Homo sapiens GN=SEC13 PE=1 SV=3 - [SEC13_HUMAN]	SEC13	1411.28	47.83	1	11	11	35	322	35.5	5.48	0.912	-0.133	32	22.4	0.872	-0.198	32	17.7	-0.164884	20.05	0.803	-0.317	32	20	0.938	-0.092	32	11	-0.200084	15.5	0.74	-0.434	32	26	0.834	-0.262	32	18.1	-0.345564	22.05	5	FALSE	FALSE	TRUE	FALSE	0.994	-0.009	32
Q9Y6G9	Cytoplasmic dynein 1 light intermediate chain 1 OS=Homo sapiens GN=DYNC1LI1 PE=1 SV=3 - [DC1L1_HUMAN]	DYNC1LI1	1821.5	56.98	1	29	30	72	523	56.5	6.42	1.015	0.021	70	17.4	1.059	0.083	70	22.4	0.0524159	19.9	1.117	0.16	70	14.9	1.159	0.213	70	16.6	0.186501	15.75	1.107	0.147	70	13.3	1.151	0.203	70	15.4	0.175045	14.35	0	FALSE	FALSE	TRUE	FALSE	0.945	-0.082	70
O43237	Cytoplasmic dynein 1 light intermediate chain 2 OS=Homo sapiens GN=DYNC1LI2 PE=1 SV=1 - [DC1L2_HUMAN]	DYNC1LI2	1917.81	57.11	1	28	29	74	492	54.1	6.38	1.032	0.045	72	16.6	1.029	0.041	72	19.9	0.0433445	18.25	1.238	0.308	72	15.7	1.307	0.386	72	13.3	0.347666	14.5	1.253	0.325	72	15.8	1.332	0.414	72	20.2	0.370164	18	1	FALSE	FALSE	TRUE	FALSE	0.989	-0.016	72
P62820	Ras-related protein Rab-1A OS=Homo sapiens GN=RAB1A PE=1 SV=3 - [RAB1A_HUMAN]	RAB1A	3312.25	89.76	3	11	22	126	205	22.7	6.21	0.928	-0.108	57	19.9	0.932	-0.102	57	29.3	-0.104697	24.6	1.076	0.106	57	15.3	1.137	0.185	57	19.5	0.146003	17.4	0.992	-0.012	57	18.1	1.028	0.04	57	21.8	0.0143553	19.95	0	FALSE	FALSE	TRUE	FALSE	1.026	0.037	57
Q9H0U4	Ras-related protein Rab-1B OS=Homo sapiens GN=RAB1B PE=1 SV=1 - [RAB1B_HUMAN]	RAB1B	2815.98	84.08	4	7	18	99	201	22.2	5.73	0.967	-0.048	30	17.9	1.036	0.051	30	32.8	0.00216242	25.35	1.103	0.141	30	15.4	1.056	0.079	30	20.3	0.110363	17.85	1.037	0.052	30	15.6	1.091	0.126	30	19.7	0.0894982	17.65	0	FALSE	FALSE	TRUE	FALSE	0.98	-0.029	30
Q13416	Origin recognition complex subunit 2 OS=Homo sapiens GN=ORC2 PE=1 SV=2 - [ORC2_HUMAN]	ORC2	106.61	18.2	1	8	8	10	577	65.9	6.51	1.134	0.181	10	30.2	1.215	0.281	10	35.3	0.232047	32.75	0.875	-0.193	10	19.1	0.843	-0.246	10	15	-0.21927	17.05	0.86	-0.218	10	15.6	0.876	-0.191	10	18	-0.204233	16.8	0	FALSE	FALSE	TRUE	FALSE	0.98	-0.029	10
Q9UBD5	Origin recognition complex subunit 3 OS=Homo sapiens GN=ORC3 PE=1 SV=1 - [ORC3_HUMAN]	ORC3	276.74	13.08	1	7	7	15	711	82.2	7.61	1.012	0.017	15	9.1	1.092	0.127	15	9.4	0.0731347	9.25	0.935	-0.097	15	19.8	0.866	-0.208	15	18.8	-0.151202	19.3	0.873	-0.196	15	13	0.955	-0.066	15	19.6	-0.129734	16.3	0	FALSE	FALSE	TRUE	FALSE	0.916	-0.127	15
O43913	Origin recognition complex subunit 5 OS=Homo sapiens GN=ORC5 PE=1 SV=1 - [ORC5_HUMAN]	ORC5	81.86	9.43	1	5	5	5	435	50.3	7.74	1.099	0.136	5	21.7	1.163	0.218	5	14.4	0.177599	18.05	0.849	-0.236	5	1.4	0.78	-0.358	5	17.9	-0.296013	9.65	0.939	-0.091	5	19.4	0.924	-0.114	5	31.8	-0.102372	25.6	0	FALSE	FALSE	TRUE	FALSE	0.926	-0.111	5
O43929	Origin recognition complex subunit 4 OS=Homo sapiens GN=ORC4 PE=1 SV=2 - [ORC4_HUMAN]	ORC4	216.49	14.91	1	5	5	8	436	50.3	8	1.174	0.231	8	14.5	1.177	0.235	8	15.8	0.233275	15.15	0.793	-0.335	8	6.1	0.793	-0.335	8	9.2	-0.334607	7.65	0.908	-0.139	8	8.8	0.923	-0.116	8	2.4	-0.127368	5.6	6	FALSE	FALSE	TRUE	FALSE	0.96	-0.059	8
Q9Y5N6	Origin recognition complex subunit 6 OS=Homo sapiens GN=ORC6 PE=1 SV=1 - [ORC6_HUMAN]	ORC6	104.95	19.44	1	3	3	5	252	28.1	8.66	0.743	-0.429	5	18.4	0.746	-0.423	5	6.6	-0.425656	12.5	0.791	-0.338	5	35.5	0.693	-0.529	5	36.3	-0.430509	35.9	0.547	-0.87	5	18.8	0.514	-0.96	5	27.5	-0.914575	23.15	5	FALSE	FALSE	TRUE	FALSE	1.042	0.059	5
Q13627	Dual specificity tyrosine-phosphorylation-regulated kinase 1A OS=Homo sapiens GN=DYRK1A PE=1 SV=2 - [DYR1A_HUMAN]	DYRK1A	169.17	8.52	3	6	6	9	763	85.5	8.75	1.09	0.124	9	20.7	1.058	0.081	9	27.1	0.102994	23.9	1.096	0.132	9	17.9	1.131	0.178	9	18.5	0.155102	18.2	1.176	0.234	9	8.5	1.274	0.349	9	5.2	0.292782	6.85	0	FALSE	FALSE	TRUE	FALSE	0.964	-0.053	9
P49918	Cyclin-dependent kinase inhibitor 1C OS=Homo sapiens GN=CDKN1C PE=1 SV=1 - [CDN1C_HUMAN]	CDKN1C	152.11	12.66	1	3	3	6	316	32.2	5.52	1.194	0.256	6	11.4	1.207	0.271	6	27.5	0.263635	19.45	0.621	-0.687	6	22	0.696	-0.523	6	5.9	-0.602745	13.95	0.707	-0.5	6	14	0.687	-0.542	6	27.2	-0.520769	20.6	6	FALSE	FALSE	TRUE	FALSE	0.938	-0.092	6
P56211	cAMP-regulated phosphoprotein 19 OS=Homo sapiens GN=ARPP19 PE=1 SV=2 - [ARP19_HUMAN]	ARPP19	493.91	36.61	1	4	5	14	112	12.3	9.09	1.005	0.007	8	47.9	1.05	0.07	8	57.8	0.0391384	52.85	0.945	-0.082	8	31.8	1.095	0.131	8	42.6	0.0285692	37.2	1.126	0.171	8	9.9	1.31	0.39	8	9.1	0.284514	9.5	0	FALSE	FALSE	TRUE	FALSE	0.946	-0.08	8
O43768	Alpha-endosulfine OS=Homo sapiens GN=ENSA PE=1 SV=1 - [ENSA_HUMAN]	ENSA	1056.32	86.78	1	9	10	48	121	13.4	7.24	0.889	-0.17	42	37.1	0.869	-0.203	42	39.2	-0.186065	38.15	1.138	0.187	42	23.5	1.223	0.29	42	28.9	0.239398	26.2	1.024	0.034	42	18.5	1.109	0.149	42	16.5	0.092884	17.5	0	FALSE	FALSE	TRUE	FALSE	0.958	-0.062	42
Q96GX5	Serine/threonine-protein kinase greatwall OS=Homo sapiens GN=MASTL PE=1 SV=1 - [GWL_HUMAN]	MASTL	392.97	11.04	3	6	7	16	879	97.3	5.99	0.94	-0.089	11	32.4	0.927	-0.109	11	27.3	-0.0992781	29.85	0.848	-0.238	11	6.8	0.89	-0.168	11	10.1	-0.202572	8.45	0.793	-0.335	11	26.2	0.807	-0.309	11	27.4	-0.321928	26.8	5	FALSE	FALSE	TRUE	FALSE	1.055	0.077	11
Q66LE6	Serine/threonine-protein phosphatase 2A 55 kDa regulatory subunit B delta isoform OS=Homo sapiens GN=PPP2R2D PE=2 SV=1 - [2ABD_HUMAN]	PPP2R2D	195.83	26.93	1	4	8	10	453	52	6.39	0.866	-0.208	5	3.6	0.823	-0.281	5	12.3	-0.243831	7.95	1.168	0.224	5	6.1	1.298	0.376	5	9.5	0.302173	7.8	0.963	-0.054	5	10.2	0.982	-0.026	5	13.6	-0.0402298	11.9	4	FALSE	FALSE	TRUE	FALSE	0.969	-0.045	5
Q9BPX3	Condensin complex subunit 3 OS=Homo sapiens GN=NCAPG PE=1 SV=1 - [CND3_HUMAN]	NCAPG	858.39	33	1	28	29	39	1015	114.3	5.59	1.134	0.181	38	28.6	1.006	0.009	38	22.9	0.0976108	25.75	0.714	-0.486	38	19.5	0.731	-0.452	38	25	-0.468931	22.25	0.826	-0.276	38	22.6	0.816	-0.293	38	18.7	-0.284546	20.65	6	FALSE	FALSE	TRUE	FALSE	0.954	-0.068	38
Q15003	Condensin complex subunit 2 OS=Homo sapiens GN=NCAPH PE=1 SV=3 - [CND2_HUMAN]	NCAPH	1210.42	39.27	1	26	26	43	741	82.5	5.06	0.956	-0.065	43	35.2	1.009	0.013	43	38.4	-0.0254707	36.8	0.766	-0.385	43	27.4	0.776	-0.366	43	19.9	-0.375197	23.65	0.742	-0.431	43	43.2	0.748	-0.419	43	30.9	-0.424688	37.05	5	FALSE	FALSE	TRUE	FALSE	0.978	-0.032	43
Q15021	Condensin complex subunit 1 OS=Homo sapiens GN=NCAPD2 PE=1 SV=3 - [CND1_HUMAN]	NCAPD2	2016.91	33.33	1	36	36	71	1401	157.1	6.61	1.048	0.068	71	32.4	1.05	0.07	71	32.1	0.0690147	32.25	0.755	-0.405	71	18.9	0.797	-0.327	71	21.3	-0.365871	20.1	0.771	-0.375	71	25.6	0.828	-0.272	71	31.6	-0.32283	28.6	6	FALSE	FALSE	TRUE	FALSE	0.939	-0.091	71
Q9NTJ3	Structural maintenance of chromosomes protein 4 OS=Homo sapiens GN=SMC4 PE=1 SV=2 - [SMC4_HUMAN]	SMC4	1879.14	42.39	1	55	55	105	1288	147.1	6.79	0.868	-0.204	105	22.9	0.857	-0.223	105	27.7	-0.213404	25.3	0.772	-0.373	105	20.5	0.717	-0.48	105	23.8	-0.425656	22.15	0.67	-0.578	105	28	0.631	-0.664	105	25.3	-0.620379	26.65	5	FALSE	FALSE	TRUE	FALSE	0.951	-0.072	105
O95347	Structural maintenance of chromosomes protein 2 OS=Homo sapiens GN=SMC2 PE=1 SV=2 - [SMC2_HUMAN]	SMC2	2401.65	48.87	1	57	57	103	1197	135.6	8.43	0.904	-0.146	100	19.6	0.973	-0.039	100	20.7	-0.0915713	20.15	0.778	-0.362	100	12.7	0.737	-0.44	100	16.6	-0.400682	14.65	0.727	-0.46	100	23.8	0.722	-0.47	100	23.8	-0.464942	23.8	5	FALSE	FALSE	TRUE	FALSE	0.958	-0.062	100
Q14980	Nuclear mitotic apparatus protein 1 OS=Homo sapiens GN=NUMA1 PE=1 SV=2 - [NUMA1_HUMAN]	NUMA1	5146.12	57.26	1	104	105	201	2115	238.1	5.78	1.112	0.153	200	26.9	1.192	0.253	200	25.1	0.204141	26	1.032	0.045	200	15.6	0.98	-0.029	200	15.2	0.00863031	15.4	1.166	0.222	200	20.5	1.119	0.162	200	22.8	0.192194	21.65	0	FALSE	FALSE	TRUE	FALSE	0.99	-0.014	200
Q6IBW4	Condensin-2 complex subunit H2 OS=Homo sapiens GN=NCAPH2 PE=1 SV=1 - [CNDH2_HUMAN]	NCAPH2	104.39	15.37	1	6	6	6	605	68.2	4.74	0.899	-0.154	6	17.4	0.809	-0.306	6	21.7	-0.227692	19.55	0.916	-0.127	6	17.5	0.928	-0.108	6	35.4	-0.117161	26.45	0.838	-0.255	6	16.6	0.735	-0.444	6	5.9	-0.346481	11.25	4	FALSE	FALSE	TRUE	FALSE	1.043	0.061	6
P42695	Condensin-2 complex subunit D3 OS=Homo sapiens GN=NCAPD3 PE=1 SV=2 - [CNDD3_HUMAN]	NCAPD3	53.32	1	1	1	1	1	1498	168.8	7.5	0.627	-0.673	1	NA	1.085	0.118	1	NA	-0.224317	NA	1.074	0.103	1	NA	0.917	-0.125	1	NA	-0.00650678	NA	0.667	-0.584	1	NA	0.99	-0.014	1	NA	-0.271426	NA		FALSE	FALSE	FALSE		0.877	-0.189	1
Q86XI2	Condensin-2 complex subunit G2 OS=Homo sapiens GN=NCAPG2 PE=1 SV=1 - [CNDG2_HUMAN]	NCAPG2	152.97	9.89	1	7	7	7	1143	130.9	6.87	1.036	0.051	7	22.6	1.037	0.052	7	23	0.0517201	22.8	0.918	-0.123	7	7.2	0.818	-0.29	7	32	-0.204233	19.6	0.934	-0.099	7	32.8	0.987	-0.019	7	23.5	-0.0581425	28.15	0	FALSE	FALSE	TRUE	FALSE	1.051	0.072	7
Q86XL3	Ankyrin repeat and LEM domain-containing protein 2 OS=Homo sapiens GN=ANKLE2 PE=1 SV=4 - [ANKL2_HUMAN]	ANKLE2	486.45	16.74	1	11	11	14	938	104	7.09	1	0	14	11.2	0.968	-0.047	14	19.5	-0.0232698	15.35	1.027	0.038	14	12.1	1.048	0.068	14	13.8	0.0531113	12.95	0.984	-0.023	14	16.1	0.928	-0.108	14	11.4	-0.0649175	13.75	0	FALSE	FALSE	TRUE	FALSE	1.096	0.132	14
Q8TD19	Serine/threonine-protein kinase Nek9 OS=Homo sapiens GN=NEK9 PE=1 SV=2 - [NEK9_HUMAN]	NEK9	221.97	7.46	1	7	7	9	979	107.1	5.74	1.253	0.325	9	11.1	1.079	0.11	9	11.7	0.221568	11.4	0.944	-0.083	9	12.9	0.924	-0.114	9	20.7	-0.0985055	16.8	1.113	0.154	9	11.7	1.053	0.075	9	17.9	0.115033	14.8	0	FALSE	FALSE	TRUE	FALSE	1.057	0.08	9
Q8TDX7	Serine/threonine-protein kinase Nek7 OS=Homo sapiens GN=NEK7 PE=1 SV=1 - [NEK7_HUMAN]	NEK7	144.29	15.23	1	4	5	7	302	34.5	8.25	0.977	-0.034	5	11.1	0.96	-0.059	5	16.4	-0.046176	13.75	1.173	0.23	5	3.8	1.185	0.245	5	4.5	0.237564	4.15	1.132	0.179	5	4.3	1.2	0.263	5	9.9	0.221568	7.1	0	FALSE	FALSE	TRUE	FALSE	0.979	-0.031	5
Q9HC98	Serine/threonine-protein kinase Nek6 OS=Homo sapiens GN=NEK6 PE=1 SV=2 - [NEK6_HUMAN]	NEK6	68.74	11.18	1	2	3	4	313	35.7	8.03	0.957	-0.063	2	6.8	0.91	-0.136	2	10.8	-0.0992781	8.8	0.79	-0.34	2	19.8	0.806	-0.311	2	4.2	-0.325539	12	0.75	-0.415	2	26.8	0.73	-0.454	2	15	-0.434403	20.9		FALSE	FALSE	FALSE		1.028	0.04	2
P48730	Casein kinase I isoform delta OS=Homo sapiens GN=CSNK1D PE=1 SV=2 - [KC1D_HUMAN]	CSNK1D	55	7.71	1	1	3	3	415	47.3	9.74	0.719	-0.476	1	NA	0.679	-0.559	1	NA	-0.516636	NA	1.164	0.219	1	NA	1.317	0.397	1	NA	0.310922	NA	0.83	-0.269	1	NA	0.89	-0.168	1	NA	-0.217591	NA		FALSE	FALSE	FALSE		0.97	-0.044	1
O75935	Dynactin subunit 3 OS=Homo sapiens GN=DCTN3 PE=1 SV=1 - [DCTN3_HUMAN]	DCTN3	660.03	69.35	1	14	14	30	186	21.1	5.47	1.016	0.023	29	21.9	1.077	0.107	29	17.2	0.0655723	19.55	1.243	0.314	29	12.4	1.258	0.331	29	20.9	0.322505	16.65	1.257	0.33	29	15.5	1.248	0.32	29	16.8	0.324811	16.15	1	FALSE	FALSE	TRUE	FALSE	0.979	-0.031	29
Q13561	Dynactin subunit 2 OS=Homo sapiens GN=DCTN2 PE=1 SV=4 - [DCTN2_HUMAN]	DCTN2	3527.6	75.31	1	31	31	114	401	44.2	5.21	0.975	-0.037	114	23.9	0.941	-0.088	114	23.4	-0.0619024	23.65	1.318	0.398	114	17.8	1.43	0.516	114	16.4	0.458382	17.1	1.227	0.295	114	24.3	1.293	0.371	114	21.7	0.333424	23	1	FALSE	FALSE	TRUE	FALSE	0.969	-0.045	114
P61163	Alpha-centractin OS=Homo sapiens GN=ACTR1A PE=1 SV=1 - [ACTZ_HUMAN]	ACTR1A	1862.85	55.59	1	15	27	81	376	42.6	6.64	1.137	0.185	40	30	1.012	0.017	40	38.8	0.103665	34.4	1.291	0.368	40	23.1	1.347	0.43	40	23.4	0.399445	23.25	1.443	0.529	40	30	1.521	0.605	40	37.4	0.567545	33.7	1	FALSE	FALSE	TRUE	FALSE	1.056	0.079	40
P41208	Centrin-2 OS=Homo sapiens GN=CETN2 PE=1 SV=1 - [CETN2_HUMAN]	CETN2	950.09	63.95	2	8	8	27	172	19.7	5	0.895	-0.16	27	25.2	0.899	-0.154	27	18.9	-0.15682	22.05	0.928	-0.108	27	11.1	0.961	-0.057	27	19	-0.0823773	15.05	0.866	-0.208	27	19.7	0.958	-0.062	27	32.4	-0.132894	26.05	0	FALSE	FALSE	TRUE	FALSE	0.932	-0.102	27
Q15691	Microtubule-associated protein RP/EB family member 1 OS=Homo sapiens GN=MAPRE1 PE=1 SV=3 - [MARE1_HUMAN]	MAPRE1	2380.49	75	1	24	27	97	268	30	5.14	1.23	0.299	91	47.3	1.111	0.152	91	37.1	0.227125	42.2	1.012	0.017	91	22.6	1.125	0.17	91	33.9	0.0955869	28.25	1.201	0.264	91	24.6	1.261	0.335	91	25.5	0.299831	25.05	0	FALSE	FALSE	TRUE	FALSE	0.997	-0.004	91
Q9NXR1	Nuclear distribution protein nudE homolog 1 OS=Homo sapiens GN=NDE1 PE=1 SV=2 - [NDE1_HUMAN]	NDE1	156.47	16.18	1	2	4	7	346	38.8	5.27	0.852	-0.231	3	0.3	0.827	-0.274	3	14.4	-0.252398	7.35	1.019	0.027	3	0.1	1	0	3	13	0.0136409	6.55	0.773	-0.371	3	6.4	0.793	-0.335	3	5.5	-0.352916	5.95	4	FALSE	FALSE	TRUE	FALSE	0.952	-0.071	3
Q14008	Cytoskeleton-associated protein 5 OS=Homo sapiens GN=CKAP5 PE=1 SV=3 - [CKAP5_HUMAN]	CKAP5	4116.78	42.57	1	86	86	194	2032	225.4	7.8	1.039	0.055	194	27	1.036	0.051	194	27.8	0.0531113	27.4	1.097	0.134	194	17	1.102	0.14	194	17.3	0.136848	17.15	1.152	0.204	194	19.3	1.145	0.195	194	22.2	0.199751	20.75	0	FALSE	FALSE	TRUE	FALSE	1.013	0.019	194
Q9HC77	Centromere protein J OS=Homo sapiens GN=CENPJ PE=1 SV=2 - [CENPJ_HUMAN]	CENPJ	47.53	1.79	1	1	1	1	1338	152.9	6.61	0.854	-0.228	1	NA	0.855	-0.226	1	NA	-0.226848	NA	0.95	-0.074	1	NA	0.989	-0.016	1	NA	-0.0446872	NA	0.804	-0.315	1	NA	0.842	-0.248	1	NA	-0.281036	NA		FALSE	FALSE	FALSE		0.987	-0.019	1
O43303	Centriolar coiled-coil protein of 110 kDa OS=Homo sapiens GN=CCP110 PE=1 SV=3 - [CP110_HUMAN]	CCP110	96.43	5.53	1	3	3	3	1012	113.4	8.65	1.247	0.318	3	20	1.031	0.044	3	5.2	0.187768	12.6	0.819	-0.288	3	2.2	1.008	0.011	3	17.3	-0.130523	9.75	0.916	-0.127	3	5.2	1.035	0.05	3	8	-0.0357862	6.6	0	FALSE	FALSE	TRUE	FALSE	1.023	0.033	3
P43034	Platelet-activating factor acetylhydrolase IB subunit alpha OS=Homo sapiens GN=PAFAH1B1 PE=1 SV=2 - [LIS1_HUMAN]	PAFAH1B1	1416.56	60.24	1	24	25	56	410	46.6	7.37	1.283	0.36	54	32	1.196	0.258	54	28.5	0.309758	30.25	1.098	0.135	54	21	1.271	0.346	54	15.3	0.244278	18.15	1.318	0.398	54	17.2	1.546	0.629	54	26.4	0.518031	21.8	3	FALSE	FALSE	TRUE	FALSE	0.949	-0.076	54
Q7Z460	CLIP-associating protein 1 OS=Homo sapiens GN=CLASP1 PE=1 SV=1 - [CLAP1_HUMAN]	CLASP1	2470.91	39.66	1	52	57	112	1538	169.3	9.03	1.095	0.131	97	29.7	1.067	0.094	98	25.5	0.112367	27.6	1.143	0.193	98	17.7	1.186	0.246	98	16.2	0.219711	16.95	1.283	0.36	97	24.1	1.313	0.393	98	25.8	0.37629	24.95	1	FALSE	FALSE	TRUE	FALSE	0.991	-0.013	97
O95684	FGFR1 oncogene partner OS=Homo sapiens GN=FGFR1OP PE=1 SV=1 - [FR1OP_HUMAN]	FGFR1OP	221.64	15.29	1	4	4	8	399	43	4.81	0.963	-0.054	8	18.4	0.946	-0.08	8	19.8	-0.0671829	19.1	0.904	-0.146	8	23	0.95	-0.074	8	24.8	-0.109359	23.9	0.838	-0.255	8	24	0.993	-0.01	8	18	-0.127368	21	0	FALSE	FALSE	TRUE	FALSE	0.964	-0.053	8
P07437	Tubulin beta chain OS=Homo sapiens GN=TUBB PE=1 SV=2 - [TBB5_HUMAN]	TUBB	38792.6	78.6	2	8	41	1600	444	49.6	4.89	1.101	0.139	211	16	1.168	0.224	211	26.1	0.182057	21.05	1.221	0.288	211	18.6	1.345	0.428	211	21.9	0.359521	20.25	1.411	0.497	211	17.8	1.684	0.752	211	24.6	0.629939	21.2	1	FALSE	FALSE	TRUE	FALSE	0.927	-0.109	211
O15078	Centrosomal protein of 290 kDa OS=Homo sapiens GN=CEP290 PE=1 SV=2 - [CE290_HUMAN]	CEP290	155.98	3.27	7	5	9	19	2479	290.2	5.95	0.896	-0.158	6	17.6	0.979	-0.031	6	30.6	-0.0931094	24.1	0.947	-0.079	6	9.7	1.08	0.111	6	17.8	0.0193461	13.75	0.915	-0.128	6	14.8	0.869	-0.203	6	13.5	-0.164884	14.15	0	FALSE	FALSE	TRUE	FALSE	0.991	-0.013	6
P49674	Casein kinase I isoform epsilon OS=Homo sapiens GN=CSNK1E PE=1 SV=1 - [KC1E_HUMAN]	CSNK1E	159.76	14.18	1	3	5	7	416	47.3	9.66	1.064	0.089	5	6.6	0.964	-0.053	5	12.1	0.0200577	9.35	1.402	0.487	5	19.1	1.361	0.445	5	8.6	0.466236	13.85	1.399	0.484	5	17.5	1.343	0.425	5	29.7	0.455229	23.6	1	FALSE	FALSE	TRUE	FALSE	1.094	0.13	5
O75665	Oral-facial-digital syndrome 1 protein OS=Homo sapiens GN=OFD1 PE=1 SV=1 - [OFD1_HUMAN]	OFD1	159.84	7.21	1	7	7	10	1012	116.6	6.1	0.839	-0.253	10	21.3	0.823	-0.281	10	22.9	-0.26708	22.1	0.955	-0.066	10	7.5	0.915	-0.128	10	13.8	-0.0969617	10.65	0.77	-0.377	10	33.8	0.792	-0.336	10	23.7	-0.356606	28.75	4	FALSE	FALSE	TRUE	FALSE	1.012	0.017	10
P61006	Ras-related protein Rab-8A OS=Homo sapiens GN=RAB8A PE=1 SV=1 - [RAB8A_HUMAN]	RAB8A	965.66	59.9	3	7	15	56	207	23.7	9.07	0.848	-0.238	14	26.8	0.87	-0.201	14	26.5	-0.21927	26.65	1.101	0.139	14	20.8	0.912	-0.133	14	24.7	0.00934717	22.75	0.974	-0.038	14	36.1	0.8	-0.322	14	17.7	-0.172994	26.9	0	FALSE	FALSE	TRUE	FALSE	1.085	0.118	14
Q9Y6X3	MAU2 chromatid cohesion factor homolog OS=Homo sapiens GN=MAU2 PE=1 SV=2 - [SCC4_HUMAN]	MAU2	53.74	3.26	1	2	2	2	613	69	7.25	0.886	-0.175	2	10	0.817	-0.292	2	18.1	-0.231922	14.05	1.088	0.122	2	9.7	1.096	0.132	2	3.6	0.126973	6.65	0.955	-0.066	2	0.3	0.891	-0.167	2	21.8	-0.115597	11.05		FALSE	FALSE	FALSE		1.088	0.122	2
Q6KC79	Nipped-B-like protein OS=Homo sapiens GN=NIPBL PE=1 SV=2 - [NIPBL_HUMAN]	NIPBL	243.04	4.14	1	11	11	13	2804	315.9	7.91	1.131	0.178	13	7.4	1.206	0.27	13	8.9	0.224658	8.15	1.025	0.036	13	7.7	0.899	-0.154	13	16.3	-0.0558912	12	1.127	0.172	13	9	1.035	0.05	13	10	0.112367	9.5	0	FALSE	FALSE	TRUE	FALSE	1.026	0.037	13
O43264	Centromere/kinetochore protein zw10 homolog OS=Homo sapiens GN=ZW10 PE=1 SV=3 - [ZW10_HUMAN]	ZW10	779.9	28.63	1	19	19	32	779	88.8	6.27	0.904	-0.146	32	17.4	0.899	-0.154	32	24.8	-0.149601	21.1	1.02	0.029	32	18.2	1.059	0.083	32	20.1	0.0558898	19.15	0.901	-0.15	32	22.8	0.984	-0.023	32	28.4	-0.0854355	25.6	0	FALSE	FALSE	TRUE	FALSE	0.954	-0.068	32
P20700	Lamin-B1 OS=Homo sapiens GN=LMNB1 PE=1 SV=2 - [LMNB1_HUMAN]	LMNB1	6675.04	84.13	1	75	81	341	586	66.4	5.16	0.963	-0.054	296	27.6	1.006	0.009	296	30.4	-0.0225369	29	1.129	0.175	296	20.1	1.134	0.181	296	19.8	0.178237	19.95	1.06	0.084	296	25.6	1.102	0.14	296	25.8	0.112367	25.7	0	FALSE	FALSE	TRUE	FALSE	0.937	-0.094	296
O95476	CTD nuclear envelope phosphatase 1 OS=Homo sapiens GN=CTDNEP1 PE=1 SV=2 - [CNEP1_HUMAN]	CTDNEP1	23.27	4.1	1	1	1	1	244	28.4	9.76	0.973	-0.039	1	NA	1.107	0.147	1	NA	0.0565835	NA	1.177	0.235	1	NA	0.825	-0.278	1	NA	0.00144197	NA	1.134	0.181	1	NA	0.909	-0.138	1	NA	0.0306892	NA		FALSE	FALSE	FALSE		1.083	0.115	1
Q7L2Z9	Centromere protein Q OS=Homo sapiens GN=CENPQ PE=1 SV=1 - [CENPQ_HUMAN]	CENPQ	23.43	5.22	1	1	1	1	268	30.6	9.42	0.857	-0.223	1	NA	0.911	-0.134	1	NA	-0.177882	NA	0.922	-0.117	1	NA	0.815	-0.295	1	NA	-0.203402	NA	0.783	-0.353	1	NA	0.739	-0.436	1	NA	-0.394032	NA		FALSE	FALSE	FALSE		1.091	0.126	1
Q8NG31	Protein CASC5 OS=Homo sapiens GN=CASC5 PE=1 SV=3 - [CASC5_HUMAN]	CASC5	139.22	1.92	1	4	4	4	2342	265.2	5.47	0.834	-0.262	4	15.3	0.79	-0.34	4	19.1	-0.300448	17.2	0.768	-0.381	4	5.1	0.858	-0.221	4	16	-0.298673	10.55	0.651	-0.619	4	24.2	0.688	-0.54	4	18.9	-0.578844	21.55	5	FALSE	FALSE	TRUE	FALSE	0.983	-0.025	4
Q8N2Z9	Centromere protein S OS=Homo sapiens GN=APITD1 PE=1 SV=1 - [CENPS_HUMAN]	APITD1	26.03	10.87	1	1	1	1	138	15.9	6.05	0.887	-0.173	1	NA	1.013	0.019	1	NA	-0.0740006	NA	0.481	-1.056	1	NA	0.64	-0.644	1	NA	-0.835214	NA	0.423	-1.241	1	NA	0.646	-0.63	1	NA	-0.903738	NA		FALSE	FALSE	FALSE		0.764	-0.388	1
Q9NSP4	Centromere protein M OS=Homo sapiens GN=CENPM PE=1 SV=1 - [CENPM_HUMAN]	CENPM	23.06	4.44	1	1	1	1	180	19.7	7.2	1.11	0.151	1	NA	0.918	-0.123	1	NA	0.0200577	NA	0.762	-0.392	1	NA	0.969	-0.045	1	NA	-0.208394	NA	0.839	-0.253	1	NA	0.885	-0.176	1	NA	-0.21424	NA		FALSE	FALSE	FALSE		1.019	0.027	1
Q9BS16	Centromere protein K OS=Homo sapiens GN=CENPK PE=1 SV=1 - [CENPK_HUMAN]	CENPK	143.61	15.99	1	2	2	4	269	31.6	4.89	0.827	-0.274	4	17.3	0.885	-0.176	4	26.4	-0.224317	21.85	0.699	-0.517	4	16.5	0.79	-0.34	4	16.1	-0.425656	16.3	0.587	-0.769	4	24.3	0.694	-0.527	4	26.2	-0.64273	25.25	5	FALSE	FALSE	TRUE	FALSE	0.92	-0.12	4
Q71F23	Centromere protein U OS=Homo sapiens GN=CENPU PE=1 SV=1 - [CENPU_HUMAN]	CENPU	59.94	10.29	1	4	4	4	418	47.5	9.13	0.866	-0.208	4	4.5	0.774	-0.37	4	8.5	-0.286304	6.5	0.839	-0.253	4	7	0.89	-0.168	4	3.4	-0.210062	5.2	0.703	-0.508	4	9.2	0.697	-0.521	4	6.9	-0.514573	8.05	5	FALSE	FALSE	TRUE	FALSE	1.026	0.037	4
Q9H3R5	Centromere protein H OS=Homo sapiens GN=CENPH PE=1 SV=1 - [CENPH_HUMAN]	CENPH	145.46	24.29	1	5	5	6	247	28.5	5.29	0.886	-0.175	6	16.2	0.887	-0.173	6	18.5	-0.173807	17.35	0.688	-0.54	6	18	0.833	-0.264	6	31.5	-0.39498	24.75	0.604	-0.727	6	21.3	0.648	-0.626	6	38.3	-0.675765	29.8	5	FALSE	FALSE	TRUE	FALSE	0.966	-0.05	6
Q03188	Centromere protein C OS=Homo sapiens GN=CENPC PE=1 SV=2 - [CENPC_HUMAN]	CENPC	121.1	6.57	1	5	5	5	943	106.8	9.39	0.852	-0.231	5	24.6	0.977	-0.034	5	23.7	-0.128945	24.15	1.059	0.083	5	6.5	0.953	-0.069	5	10.9	0.00863031	8.7	0.946	-0.08	5	7.1	0.926	-0.111	5	17.1	-0.0954196	12.1	0	FALSE	FALSE	TRUE	FALSE	1.01	0.014	5
Q92674	Centromere protein I OS=Homo sapiens GN=CENPI PE=1 SV=2 - [CENPI_HUMAN]	CENPI	23.1	1.46	1	1	1	1	756	86.7	8.76	0.978	-0.032	1	NA	0.99	-0.014	1	NA	-0.0232698	NA	0.839	-0.253	1	NA	0.96	-0.059	1	NA	-0.152805	NA	0.813	-0.299	1	NA	0.946	-0.08	1	NA	-0.185245	NA		FALSE	FALSE	FALSE		0.961	-0.057	1
O75122	CLIP-associating protein 2 OS=Homo sapiens GN=CLASP2 PE=1 SV=2 - [CLAP2_HUMAN]	CLASP2	1519.6	40.03	1	33	38	61	1294	141	8.47	1.117	0.16	47	20.9	1.045	0.064	47	20.4	0.112367	20.65	1.337	0.419	47	18.2	1.424	0.51	47	17.4	0.465191	17.8	1.548	0.63	47	23.6	1.513	0.597	47	25.9	0.614003	24.75	1	FALSE	FALSE	TRUE	FALSE	1.033	0.047	47
Q9NYZ3	G2 and S phase-expressed protein 1 OS=Homo sapiens GN=GTSE1 PE=1 SV=3 - [GTSE1_HUMAN]	GTSE1	51.12	5.14	1	3	3	3	720	76.6	9.39	0.847	-0.24	3	12.8	0.84	-0.252	3	1.2	-0.24554	7	0.799	-0.324	3	8.7	0.787	-0.346	3	9.8	-0.334607	9.25	0.648	-0.626	3	9.3	0.658	-0.604	3	8.6	-0.614845	8.95	5	FALSE	FALSE	TRUE	FALSE	1.005	0.007	3
P30307	M-phase inducer phosphatase 3 OS=Homo sapiens GN=CDC25C PE=1 SV=2 - [MPIP3_HUMAN]	CDC25C	73.12	5.07	1	2	2	3	473	53.3	6.79	1.008	0.011	3	2.1	0.97	-0.044	3	1.2	-0.0159576	1.65	0.748	-0.419	3	53.5	0.772	-0.373	3	54.5	-0.395929	54	0.775	-0.368	3	47	0.752	-0.411	3	55.2	-0.3893	51.1	5	FALSE	FALSE	TRUE	FALSE	1.003	0.004	3
P49454	Centromere protein F OS=Homo sapiens GN=CENPF PE=1 SV=2 - [CENPF_HUMAN]	CENPF	1927.52	28.29	2	75	76	107	3210	367.5	5.07	0.838	-0.255	101	16.9	0.812	-0.3	101	19.3	-0.277534	18.1	0.711	-0.492	101	23.4	0.693	-0.529	101	29.8	-0.510457	26.6	0.59	-0.761	101	29	0.572	-0.806	101	31	-0.78339	30	5	FALSE	FALSE	TRUE	FALSE	0.969	-0.045	101
P18858	DNA ligase 1 OS=Homo sapiens GN=LIG1 PE=1 SV=1 - [DNLI1_HUMAN]	LIG1	405.01	15.13	1	13	13	20	919	101.7	5.62	1.014	0.02	20	39.5	0.993	-0.01	20	40.4	0.00504062	39.95	0.715	-0.484	20	19.8	0.701	-0.513	20	18.9	-0.498179	19.35	0.798	-0.326	20	24.5	0.758	-0.4	20	22.4	-0.362158	23.45	5	FALSE	FALSE	TRUE	FALSE	0.968	-0.047	20
Q9H8Y8	Golgi reassembly-stacking protein 2 OS=Homo sapiens GN=GORASP2 PE=1 SV=3 - [GORS2_HUMAN]	GORASP2	509.66	23.45	1	8	8	17	452	47.1	4.82	0.93	-0.105	17	14	0.899	-0.154	17	15.1	-0.128945	14.55	1.032	0.045	17	14.9	1.06	0.084	17	9.8	0.0648829	12.35	0.99	-0.014	17	17.2	1.069	0.096	17	17.3	0.0419438	17.25	0	FALSE	FALSE	TRUE	FALSE	0.98	-0.029	17
P61019	Ras-related protein Rab-2A OS=Homo sapiens GN=RAB2A PE=1 SV=1 - [RAB2A_HUMAN]	RAB2A	917.25	58.02	1	6	11	31	212	23.5	6.54	0.979	-0.031	17	29.2	1.034	0.048	17	46.6	0.00934717	37.9	1.273	0.348	17	15.2	1.27	0.345	17	32.7	0.346531	23.95	1.242	0.313	17	15.7	1.151	0.203	17	28	0.25882	21.85	1	FALSE	FALSE	TRUE	FALSE	1.082	0.114	17
Q02224	Centromere-associated protein E OS=Homo sapiens GN=CENPE PE=1 SV=2 - [CENPE_HUMAN]	CENPE	259.97	5.37	1	13	13	14	2701	316.2	5.64	0.903	-0.147	14	23.2	0.805	-0.313	14	29.7	-0.227692	26.45	0.882	-0.181	14	14.7	0.878	-0.188	14	17.9	-0.184425	16.3	0.777	-0.364	14	15.1	0.68	-0.556	14	26.9	-0.456999	21	5	FALSE	FALSE	TRUE	FALSE	1.054	0.076	14
Q99661	Kinesin-like protein KIF2C OS=Homo sapiens GN=KIF2C PE=1 SV=2 - [KIF2C_HUMAN]	KIF2C	382.21	23.72	1	10	13	22	725	81.3	7.83	0.976	-0.035	17	16.3	1.002	0.003	17	14.9	-0.0159576	15.6	0.737	-0.44	17	17	0.71	-0.494	17	26.9	-0.466935	21.95	0.697	-0.521	17	33.9	0.674	-0.569	17	20.3	-0.544771	27.1	5	FALSE	FALSE	TRUE	FALSE	0.989	-0.016	17
O00139	Kinesin-like protein KIF2A OS=Homo sapiens GN=KIF2A PE=1 SV=3 - [KIF2A_HUMAN]	KIF2A	470.47	32.44	1	21	24	34	706	79.9	6.68	1.172	0.229	29	12.4	1.077	0.107	29	16.3	0.169284	14.35	1.053	0.075	29	9.7	1.054	0.076	29	11.8	0.0751903	10.75	1.196	0.258	29	10.9	1.192	0.253	29	18.4	0.255803	14.65	0	FALSE	FALSE	TRUE	FALSE	1.028	0.04	29
P30291	Wee1-like protein kinase OS=Homo sapiens GN=WEE1 PE=1 SV=2 - [WEE1_HUMAN]	WEE1	201.17	8.05	1	5	5	6	646	71.6	6.77	1.19	0.251	6	9.8	1.109	0.149	6	16	0.201006	12.9	0.698	-0.519	6	8.9	0.668	-0.582	6	13.5	-0.550043	11.2	0.791	-0.338	6	20	0.712	-0.49	6	18.6	-0.412155	19.3	6	FALSE	FALSE	TRUE	FALSE	1.067	0.094	6
P39748	Flap endonuclease 1 OS=Homo sapiens GN=FEN1 PE=1 SV=1 - [FEN1_HUMAN]	FEN1	1303.3	45.79	1	17	17	44	380	42.6	8.62	1.102	0.14	44	40	1.053	0.075	44	37.4	0.107688	38.7	0.825	-0.278	44	19.4	0.773	-0.371	44	32.9	-0.323733	26.15	0.847	-0.24	44	33.2	0.846	-0.241	44	33.1	-0.240418	33.15	6	FALSE	FALSE	TRUE	FALSE	0.997	-0.004	44
P06400	Retinoblastoma-associated protein OS=Homo sapiens GN=RB1 PE=1 SV=2 - [RB_HUMAN]	RB1	423.3	14.01	1	10	10	16	928	106.1	7.94	1.027	0.038	16	9.4	1.032	0.045	16	14.1	0.0419438	11.75	0.752	-0.411	16	13.4	0.796	-0.329	16	13.1	-0.369595	13.25	0.766	-0.385	16	17.5	0.815	-0.295	16	13.9	-0.339163	15.7	5	FALSE	FALSE	TRUE	FALSE	0.92	-0.12	16
O75531	Barrier-to-autointegration factor OS=Homo sapiens GN=BANF1 PE=1 SV=1 - [BAF_HUMAN]	BANF1	422.46	67.42	1	8	8	30	89	10.1	6.09	0.708	-0.498	30	31.5	0.77	-0.377	30	19.8	-0.436354	25.65	0.888	-0.171	30	15.7	1.059	0.083	30	25.8	-0.0387471	20.75	0.643	-0.637	30	41	0.773	-0.371	30	35.8	-0.498179	38.4	4	FALSE	FALSE	TRUE	FALSE	0.934	-0.099	30
P46060	Ran GTPase-activating protein 1 OS=Homo sapiens GN=RANGAP1 PE=1 SV=1 - [RAGP1_HUMAN]	RANGAP1	3817.52	64.57	1	34	34	118	587	63.5	4.68	0.979	-0.031	118	25	0.995	-0.007	118	28.7	-0.018878	26.85	0.818	-0.29	118	19.7	0.855	-0.226	118	21.7	-0.257563	20.7	0.823	-0.281	118	27.6	0.873	-0.196	118	23.9	-0.237864	25.75	0	FALSE	FALSE	TRUE	FALSE	0.976	-0.035	118
O15392	Baculoviral IAP repeat-containing protein 5 OS=Homo sapiens GN=BIRC5 PE=1 SV=3 - [BIRC5_HUMAN]	BIRC5	161.8	23.94	1	4	4	7	142	16.4	5.9	0.766	-0.385	7	8.2	0.764	-0.388	7	6.1	-0.386468	7.15	0.673	-0.571	7	19.5	0.774	-0.37	7	12.2	-0.466935	15.85	0.572	-0.806	7	17	0.579	-0.788	7	13.2	-0.797112	15.1	5	FALSE	FALSE	TRUE	FALSE	0.964	-0.053	7
P09884	DNA polymerase alpha catalytic subunit OS=Homo sapiens GN=POLA1 PE=1 SV=2 - [DPOLA_HUMAN]	POLA1	454.07	13.06	1	17	18	24	1462	165.8	5.85	1.037	0.052	23	19.3	0.985	-0.022	23	20.5	0.015783	19.9	0.805	-0.313	23	30.7	0.893	-0.163	23	26.3	-0.236164	28.5	0.809	-0.306	23	16.5	0.754	-0.407	23	25.8	-0.355682	21.15	5	FALSE	FALSE	TRUE	FALSE	0.984	-0.023	23
P49643	DNA primase large subunit OS=Homo sapiens GN=PRIM2 PE=1 SV=2 - [PRI2_HUMAN]	PRIM2	711.32	23.77	1	11	11	25	509	58.8	7.91	0.932	-0.102	25	13.1	0.934	-0.099	25	17.3	-0.100051	15.2	0.682	-0.552	25	10.9	0.645	-0.633	25	20.4	-0.591832	15.65	0.619	-0.692	25	24.6	0.615	-0.701	25	39.1	-0.696658	31.85	5	FALSE	FALSE	TRUE	FALSE	0.939	-0.091	25
Q14181	DNA polymerase alpha subunit B OS=Homo sapiens GN=POLA2 PE=1 SV=2 - [DPOA2_HUMAN]	POLA2	290.03	18.39	1	9	9	11	598	65.9	5.24	0.94	-0.089	11	22.2	0.889	-0.17	11	24.8	-0.128945	23.5	0.741	-0.432	11	16.2	0.752	-0.411	11	17.9	-0.421786	17.05	0.656	-0.608	11	22	0.694	-0.527	11	18.7	-0.567041	20.35	5	FALSE	FALSE	TRUE	FALSE	1.004	0.006	11
P49642	DNA primase small subunit OS=Homo sapiens GN=PRIM1 PE=1 SV=1 - [PRI1_HUMAN]	PRIM1	693.42	30	1	9	10	32	420	49.9	8.21	1.058	0.081	30	15.6	1.174	0.231	30	33.1	0.158337	24.35	0.728	-0.458	30	16.1	0.692	-0.531	30	21.7	-0.494109	18.9	0.723	-0.468	30	13.4	0.803	-0.317	30	14.7	-0.390245	14.05	6	FALSE	FALSE	TRUE	FALSE	0.944	-0.083	30
P36873	Serine/threonine-protein phosphatase PP1-gamma catalytic subunit OS=Homo sapiens GN=PPP1CC PE=1 SV=1 - [PP1G_HUMAN]	PPP1CC	2204.26	67.18	1	4	21	92	323	37	6.54	0.967	-0.048	8	49.5	0.86	-0.218	8	70.5	-0.130523	60	1.087	0.12	8	26.6	0.93	-0.105	8	7.8	0.0122111	17.2	1.034	0.048	8	11.8	0.812	-0.3	8	41.5	-0.115597	26.65	0	FALSE	FALSE	TRUE	FALSE	0.982	-0.026	8
Q01105	Protein SET OS=Homo sapiens GN=SET PE=1 SV=3 - [SET_HUMAN]	SET	1200.42	43.79	2	13	13	63	290	33.5	4.32	1.014	0.02	63	22.4	1.016	0.023	63	30.2	0.0214797	26.3	0.995	-0.007	63	11.4	1.092	0.127	63	22.3	0.0614306	16.85	1.004	0.006	63	19.5	1.135	0.183	63	20	0.0969365	19.75	0	FALSE	FALSE	TRUE	FALSE	0.93	-0.105	63
Q9Y570	Protein phosphatase methylesterase 1 OS=Homo sapiens GN=PPME1 PE=1 SV=3 - [PPME1_HUMAN]	PPME1	1533.54	49.74	2	17	17	53	386	42.3	5.97	1.038	0.054	52	13.4	1.042	0.059	52	16.7	0.0565835	15.05	1.111	0.152	52	15	1.161	0.215	52	14.4	0.183963	14.7	1.145	0.195	52	11.9	1.206	0.27	52	16.1	0.233275	14	0	FALSE	FALSE	TRUE	FALSE	1.001	0.001	52
Q9UIC8	Leucine carboxyl methyltransferase 1 OS=Homo sapiens GN=LCMT1 PE=1 SV=2 - [LCMT1_HUMAN]	LCMT1	336.8	38.92	1	15	15	21	334	38.4	6.04	0.965	-0.051	21	18.5	0.949	-0.076	21	24.8	-0.0634092	21.65	1.157	0.21	21	12.6	1.341	0.423	21	23	0.320773	17.8	1.118	0.161	21	19.6	1.204	0.268	21	16.9	0.215368	18.25	1	FALSE	FALSE	TRUE	FALSE	0.946	-0.08	21
Q8WV24	Pleckstrin homology-like domain family A member 1 OS=Homo sapiens GN=PHLDA1 PE=1 SV=4 - [PHLA1_HUMAN]	PHLDA1	38.94	5.99	1	2	2	2	401	45	9.89	0.986	-0.02	2	20.6	0.858	-0.221	2	6.7	-0.117161	13.65	1.204	0.268	2	4.1	1.172	0.229	2	11.8	0.248535	7.95	1.177	0.235	2	24.9	1.001	0.001	2	18.6	0.123004	21.75		FALSE	FALSE	FALSE		1.11	0.151	2
Q9UIM3	FK506-binding protein-like OS=Homo sapiens GN=FKBPL PE=1 SV=1 - [FKBPL_HUMAN]	FKBPL	52.89	3.15	1	1	1	1	349	38.2	5.5	0.94	-0.089	1	NA	0.881	-0.183	1	NA	-0.135269	NA	1.121	0.165	1	NA	1.116	0.158	1	NA	0.161565	NA	1.044	0.062	1	NA	0.978	-0.032	1	NA	0.015783	NA		FALSE	FALSE	FALSE		1.057	0.08	1
Q9H410	Kinetochore-associated protein DSN1 homolog OS=Homo sapiens GN=DSN1 PE=1 SV=2 - [DSN1_HUMAN]	DSN1	137.82	18.26	1	6	7	9	356	40	7.05	0.94	-0.089	7	21.2	0.843	-0.246	7	19.9	-0.165693	20.55	1.052	0.073	7	12.9	0.92	-0.12	7	21.6	-0.0203404	17.25	0.915	-0.128	7	46.4	0.753	-0.409	7	22	-0.261881	34.2	0	FALSE	FALSE	TRUE	FALSE	1.055	0.077	7
P11802	Cyclin-dependent kinase 4 OS=Homo sapiens GN=CDK4 PE=1 SV=2 - [CDK4_HUMAN]	CDK4	247	36.3	6	7	8	12	303	33.7	7.01	1.138	0.187	9	12.8	1.003	0.004	9	29.7	0.0982848	21.25	0.915	-0.128	9	17.2	1.004	0.006	9	13.5	-0.0596453	15.35	1.016	0.023	9	26.1	0.946	-0.08	9	17.8	-0.027675	21.95	0	FALSE	FALSE	TRUE	FALSE	1.053	0.075	9
P42772	Cyclin-dependent kinase 4 inhibitor B OS=Homo sapiens GN=CDKN2B PE=1 SV=1 - [CDN2B_HUMAN]	CDKN2B	110.32	21.74	2	2	2	2	138	14.7	6.54	1.01	0.014	2	11.9	0.883	-0.18	2	21.4	-0.0793256	16.65	0.827	-0.274	2	16.6	1.117	0.16	2	18.3	-0.0409718	17.45	0.827	-0.274	2	28.9	0.981	-0.028	2	40.9	-0.145605	34.9		FALSE	FALSE	FALSE		1.047	0.066	2
O00716	Transcription factor E2F3 OS=Homo sapiens GN=E2F3 PE=1 SV=1 - [E2F3_HUMAN]	E2F3	120.58	11.4	2	4	4	5	465	49.1	5.44	0.968	-0.047	5	10.7	0.959	-0.06	5	21.6	-0.0536434	16.15	0.896	-0.158	5	18.9	0.961	-0.057	5	11.6	-0.107026	15.25	0.908	-0.139	5	5.4	0.918	-0.123	5	2.3	-0.131313	3.85	0	FALSE	FALSE	TRUE	FALSE	0.988	-0.017	5
Q9NQS7	Inner centromere protein OS=Homo sapiens GN=INCENP PE=1 SV=3 - [INCE_HUMAN]	INCENP	168.08	6.64	1	5	5	8	918	105.4	9.44	1.051	0.072	8	18.4	1.176	0.234	8	16.9	0.155102	17.65	0.832	-0.265	8	8.9	0.688	-0.54	8	20.6	-0.395929	14.75	0.896	-0.158	8	13	0.883	-0.18	8	17.1	-0.168933	15.05	6	FALSE	FALSE	TRUE	FALSE	1.052	0.073	8
Q53HL2	Borealin OS=Homo sapiens GN=CDCA8 PE=1 SV=2 - [BOREA_HUMAN]	CDCA8	175.09	22.86	1	3	3	3	280	31.3	9.86	0.763	-0.39	3	21.6	0.981	-0.028	3	7.3	-0.1976	14.45	0.872	-0.198	3	12.8	0.564	-0.826	3	6.1	-0.477944	9.45	0.495	-1.014	3	1.6	0.556	-0.847	3	50.9	-0.928237	26.25	5	FALSE	FALSE	TRUE	FALSE	0.965	-0.051	3
P21127	Cyclin-dependent kinase 11B OS=Homo sapiens GN=CDK11B PE=1 SV=3 - [CD11B_HUMAN]	CDK11B	406.38	18.62	2	17	17	34	795	92.7	5.57	1.031	0.044	34	19.3	1.017	0.024	34	19.9	0.0342157	19.6	1.024	0.034	34	14.5	1.051	0.072	34	10	0.0531113	12.25	1.045	0.064	34	15.9	1.068	0.095	34	16.6	0.0792928	16.25	0	FALSE	FALSE	TRUE	FALSE	0.978	-0.032	34
P62140	Serine/threonine-protein phosphatase PP1-beta catalytic subunit OS=Homo sapiens GN=PPP1CB PE=1 SV=3 - [PP1B_HUMAN]	PPP1CB	2235.61	70.95	1	8	21	91	327	37.2	6.19	1.204	0.268	20	17.5	1.13	0.176	20	31.5	0.222805	24.5	0.929	-0.106	20	12.9	0.972	-0.041	20	16.6	-0.0732415	14.75	1.152	0.204	20	15.6	1.27	0.345	20	33	0.276199	24.3	0	FALSE	FALSE	TRUE	FALSE	0.984	-0.023	20
Q56NI9	N-acetyltransferase ESCO2 OS=Homo sapiens GN=ESCO2 PE=1 SV=1 - [ESCO2_HUMAN]	ESCO2	53.14	2.5	1	1	1	1	601	68.3	9.39	0.706	-0.502	1	NA	2.019	1.014	1	NA	0.446256	NA	0.979	-0.031	1	NA	0.51	-0.971	1	NA	-0.425656	NA	0.685	-0.546	1	NA	1.024	0.034	1	NA	-0.226848	NA		FALSE	FALSE	FALSE		0.666	-0.586	1
P33993	DNA replication licensing factor MCM7 OS=Homo sapiens GN=MCM7 PE=1 SV=4 - [MCM7_HUMAN]	MCM7	1756.06	66.34	1	41	41	83	719	81.3	6.46	0.973	-0.039	82	20.3	0.996	-0.006	82	24.4	-0.0225369	22.35	0.755	-0.405	82	26	0.752	-0.411	82	25	-0.408321	25.5	0.735	-0.444	82	25.4	0.766	-0.385	82	27.1	-0.414076	26.25	5	FALSE	FALSE	TRUE	FALSE	0.945	-0.082	82
P49736	DNA replication licensing factor MCM2 OS=Homo sapiens GN=MCM2 PE=1 SV=4 - [MCM2_HUMAN]	MCM2	2409.36	47.23	1	47	47	100	904	101.8	5.52	1.006	0.009	99	31.5	0.923	-0.116	99	36.9	-0.0521469	34.2	0.761	-0.394	99	28.3	0.794	-0.333	99	33.5	-0.363085	30.9	0.804	-0.315	99	34.1	0.757	-0.402	99	24.1	-0.357529	29.1	5	FALSE	FALSE	TRUE	FALSE	0.974	-0.038	99
P25205	DNA replication licensing factor MCM3 OS=Homo sapiens GN=MCM3 PE=1 SV=3 - [MCM3_HUMAN]	MCM3	2827.92	60.89	1	46	46	112	808	90.9	5.77	0.911	-0.134	111	28.4	0.889	-0.17	111	29.2	-0.152003	28.8	0.709	-0.496	111	14.7	0.726	-0.462	111	21.5	-0.478949	18.1	0.665	-0.589	111	30.2	0.668	-0.582	111	29	-0.585323	29.6	5	FALSE	FALSE	TRUE	FALSE	0.941	-0.088	111
P33992	DNA replication licensing factor MCM5 OS=Homo sapiens GN=MCM5 PE=1 SV=5 - [MCM5_HUMAN]	MCM5	1317.81	43.46	1	29	29	65	734	82.2	8.37	0.95	-0.074	65	20.3	0.978	-0.032	65	21.9	-0.0528949	21.1	0.795	-0.331	65	21.2	0.748	-0.419	65	27	-0.374262	24.1	0.752	-0.411	65	19	0.726	-0.462	65	20	-0.436354	19.5	5	FALSE	FALSE	TRUE	FALSE	0.977	-0.034	65
Q14566	DNA replication licensing factor MCM6 OS=Homo sapiens GN=MCM6 PE=1 SV=1 - [MCM6_HUMAN]	MCM6	1856.3	56.88	1	47	47	92	821	92.8	5.41	0.924	-0.114	92	28.9	0.966	-0.05	92	28.3	-0.0816138	28.6	0.718	-0.478	92	30.1	0.717	-0.48	92	37.9	-0.478949	34	0.664	-0.591	92	27.6	0.675	-0.567	92	25.1	-0.578844	26.35	5	FALSE	FALSE	TRUE	FALSE	0.91	-0.136	92
P33991	DNA replication licensing factor MCM4 OS=Homo sapiens GN=MCM4 PE=1 SV=5 - [MCM4_HUMAN]	MCM4	4105.45	54.92	2	42	43	137	863	96.5	6.74	0.819	-0.288	135	21.6	0.84	-0.252	135	18.1	-0.269686	19.85	0.724	-0.466	135	23.2	0.688	-0.54	135	30.3	-0.50226	26.75	0.583	-0.778	135	32.3	0.602	-0.732	135	30.3	-0.755113	31.3	5	FALSE	FALSE	TRUE	FALSE	0.931	-0.103	135
Q15329	Transcription factor E2F5 OS=Homo sapiens GN=E2F5 PE=1 SV=1 - [E2F5_HUMAN]	E2F5	181.61	7.51	1	1	2	6	346	37.6	5.1	0.891	-0.167	3	16.8	0.917	-0.125	3	30.7	-0.145605	23.75	0.671	-0.576	3	4.3	0.662	-0.595	3	0.7	-0.585323	2.5	0.593	-0.754	3	28	0.601	-0.735	3	27.3	-0.744197	27.65	5	FALSE	FALSE	TRUE	FALSE	0.975	-0.037	3
Q16254	Transcription factor E2F4 OS=Homo sapiens GN=E2F4 PE=1 SV=2 - [E2F4_HUMAN]	E2F4	187.17	17.19	1	4	5	7	413	43.9	4.75	0.888	-0.171	4	1.3	0.944	-0.083	4	3.9	-0.12658	2.6	1.047	0.066	4	4.7	1.021	0.03	4	3.5	0.0482362	4.1	0.928	-0.108	4	5.8	0.962	-0.056	4	6.1	-0.0816138	5.95	0	FALSE	FALSE	TRUE	FALSE	1.044	0.062	4
O60216	Double-strand-break repair protein rad21 homolog OS=Homo sapiens GN=RAD21 PE=1 SV=2 - [RAD21_HUMAN]	RAD21	699.61	36.93	2	15	15	23	631	71.6	4.65	1.035	0.05	23	13.9	1.137	0.185	23	19.7	0.119024	16.8	0.915	-0.128	23	10.7	0.884	-0.178	23	13.7	-0.152805	12.2	0.954	-0.068	23	12.9	0.955	-0.066	23	14.4	-0.0671829	13.65	0	FALSE	FALSE	TRUE	FALSE	0.96	-0.059	23
Q9UQE7	Structural maintenance of chromosomes protein 3 OS=Homo sapiens GN=SMC3 PE=1 SV=2 - [SMC3_HUMAN]	SMC3	3037.73	55.71	1	73	73	151	1217	141.5	7.18	0.988	-0.017	151	25.7	0.983	-0.025	151	27.8	-0.0210722	26.75	0.937	-0.094	151	14.4	0.917	-0.125	151	23.9	-0.109359	19.15	0.926	-0.111	151	19	0.949	-0.076	151	18	-0.0931094	18.5	0	FALSE	FALSE	TRUE	FALSE	0.958	-0.062	151
Q8N3U4	Cohesin subunit SA-2 OS=Homo sapiens GN=STAG2 PE=1 SV=3 - [STAG2_HUMAN]	STAG2	328.12	7.96	1	4	8	11	1231	141.2	5.43	0.975	-0.037	4	56.6	0.897	-0.157	4	19.8	-0.0954196	38.2	0.957	-0.063	4	17.6	1.071	0.099	4	13.8	0.0200577	15.7	0.925	-0.112	4	28.9	0.956	-0.065	4	5.9	-0.0885002	17.4	0	FALSE	FALSE	TRUE	FALSE	0.927	-0.109	4
Q8WVM7	Cohesin subunit SA-1 OS=Homo sapiens GN=STAG1 PE=1 SV=3 - [STAG1_HUMAN]	STAG1	445.13	12.48	1	8	12	18	1258	144.3	5.59	1.1	0.138	11	23.6	1.071	0.099	11	18.9	0.11836	21.25	1.206	0.27	11	10.3	1.181	0.24	11	12.4	0.255199	11.35	1.294	0.372	11	38.1	1.229	0.297	11	17.5	0.33514	27.8	1	FALSE	FALSE	TRUE	FALSE	0.96	-0.059	11
Q14683	Structural maintenance of chromosomes protein 1A OS=Homo sapiens GN=SMC1A PE=1 SV=2 - [SMC1A_HUMAN]	SMC1A	2487.65	51.18	1	63	63	113	1233	143.1	7.64	0.974	-0.038	113	18.5	0.949	-0.076	113	18.7	-0.0566412	18.6	0.917	-0.125	113	14.6	0.896	-0.158	113	18.7	-0.141621	16.65	0.881	-0.183	113	20	0.846	-0.241	113	17.9	-0.211732	18.95	0	FALSE	FALSE	TRUE	FALSE	0.984	-0.023	113
Q14691	DNA replication complex GINS protein PSF1 OS=Homo sapiens GN=GINS1 PE=1 SV=1 - [PSF1_HUMAN]	GINS1	154.31	34.18	1	4	4	5	196	23	7.39	0.745	-0.425	5	1.7	0.796	-0.329	5	18.6	-0.376133	10.15	0.944	-0.083	5	23.6	1.025	0.036	5	12.5	-0.0225369	18.05	0.714	-0.486	5	56.5	0.728	-0.458	5	37.6	-0.471929	47.05	4	FALSE	FALSE	TRUE	FALSE	0.985	-0.022	5
Q9BRT9	DNA replication complex GINS protein SLD5 OS=Homo sapiens GN=GINS4 PE=1 SV=1 - [SLD5_HUMAN]	GINS4	334.75	32.74	1	5	5	12	223	26	4.98	0.837	-0.257	12	13.4	0.897	-0.157	12	20	-0.205896	16.7	0.777	-0.364	12	32.6	0.819	-0.288	12	35	-0.325539	33.8	0.823	-0.281	12	25.6	0.81	-0.304	12	28.3	-0.292475	26.95	5	FALSE	FALSE	TRUE	FALSE	0.98	-0.029	12
Q9Y248	DNA replication complex GINS protein PSF2 OS=Homo sapiens GN=GINS2 PE=1 SV=1 - [PSF2_HUMAN]	GINS2	286.78	37.3	1	5	5	10	185	21.4	5.44	0.784	-0.351	10	14.8	0.763	-0.39	10	16.6	-0.370527	15.7	0.716	-0.482	10	15.7	0.695	-0.525	10	22.5	-0.503282	19.1	0.564	-0.826	10	27.1	0.616	-0.699	10	32.2	-0.761213	29.65	5	FALSE	FALSE	TRUE	FALSE	0.974	-0.038	10
Q9BRX5	DNA replication complex GINS protein PSF3 OS=Homo sapiens GN=GINS3 PE=1 SV=1 - [PSF3_HUMAN]	GINS3	575.44	50.46	1	10	10	19	216	24.5	5.34	0.833	-0.264	19	17.1	0.846	-0.241	19	19.5	-0.252398	18.3	0.766	-0.385	19	10.8	0.802	-0.318	19	11.2	-0.351074	11	0.659	-0.602	19	7.4	0.675	-0.567	19	15.5	-0.584241	11.45	5	FALSE	FALSE	TRUE	FALSE	0.965	-0.051	19
Q9NYP9	Protein Mis18-alpha OS=Homo sapiens GN=MIS18A PE=1 SV=1 - [MS18A_HUMAN]	MIS18A	69.59	16.74	1	4	4	5	233	25.8	5.2	0.81	-0.304	5	27.5	0.697	-0.521	5	6.6	-0.408321	17.05	0.857	-0.223	5	15.1	0.789	-0.342	5	37.4	-0.281036	26.25	0.61	-0.713	5	5.4	0.545	-0.876	5	34.8	-0.792107	20.1	5	FALSE	FALSE	TRUE	FALSE	1.108	0.148	5
Q8NCD3	Holliday junction recognition protein OS=Homo sapiens GN=HJURP PE=1 SV=2 - [HJURP_HUMAN]	HJURP	42.18	3.07	1	2	2	2	748	83.5	9.31	0.841	-0.25	2	22.1	0.848	-0.238	2	23.2	-0.243831	22.65	0.98	-0.029	2	1.5	0.935	-0.097	2	6	-0.0626556	3.75	0.817	-0.292	2	23.7	0.789	-0.342	2	29.4	-0.316528	26.55		FALSE	FALSE	FALSE		1.029	0.041	2
Q96T23	Remodeling and spacing factor 1 OS=Homo sapiens GN=RSF1 PE=1 SV=2 - [RSF1_HUMAN]	RSF1	1291.55	25.75	1	30	30	49	1441	163.7	5.01	1.027	0.038	49	23.3	1.008	0.011	49	24	0.0250288	23.65	1.12	0.163	49	13.7	1.159	0.213	49	16.1	0.188401	14.9	1.145	0.195	49	22.2	1.182	0.241	49	23.9	0.218471	23.05	0	FALSE	FALSE	TRUE	FALSE	0.985	-0.022	49
Q9UH99	SUN domain-containing protein 2 OS=Homo sapiens GN=SUN2 PE=1 SV=3 - [SUN2_HUMAN]	SUN2	296.65	18.13	1	7	7	10	717	80.3	6.73	1.122	0.166	10	19.4	1.501	0.586	10	23.3	0.391218	21.35	1.501	0.586	10	11.7	0.896	-0.158	10	10.5	0.26123	11.1	1.533	0.616	10	19.3	1.346	0.429	10	15	0.525568	17.15		FALSE	FALSE	TRUE	TRUE	1.083	0.115	10
O94901	SUN domain-containing protein 1 OS=Homo sapiens GN=SUN1 PE=1 SV=3 - [SUN1_HUMAN]	SUN1	64.98	2.22	1	1	1	1	812	90	7.08	0.683	-0.55	1	NA	0.69	-0.535	1	NA	-0.542668	NA	1.134	0.181	1	NA	1.034	0.048	1	NA	0.116365	NA	0.768	-0.381	1	NA	0.71	-0.494	1	NA	-0.436354	NA		FALSE	FALSE	FALSE		1.234	0.303	1
Q8WXH0	Nesprin-2 OS=Homo sapiens GN=SYNE2 PE=1 SV=3 - [SYNE2_HUMAN]	SYNE2	1581.28	12.77	2	67	70	93	6885	795.9	5.36	1.023	0.033	88	21.2	1.19	0.251	88	28.4	0.146003	24.8	1.24	0.31	88	12.9	0.934	-0.099	88	14.6	0.120352	13.75	1.265	0.339	88	18.8	1.19	0.251	88	19.3	0.295723	19.05	0	FALSE	FALSE	TRUE	FALSE	1.006	0.009	88
Q8NF91	Nesprin-1 OS=Homo sapiens GN=SYNE1 PE=1 SV=4 - [SYNE1_HUMAN]	SYNE1	450.51	3.72	2	21	24	30	8797	1010.5	5.53	1.023	0.033	26	19	1.113	0.154	26	19.2	0.0949116	19.1	1.081	0.112	26	9	1.026	0.037	26	14.9	0.0751903	11.95	1.095	0.131	26	17.8	1.106	0.145	26	9.9	0.138159	13.85	0	FALSE	FALSE	TRUE	FALSE	0.98	-0.029	26
Q9P2W1	Homologous-pairing protein 2 homolog OS=Homo sapiens GN=PSMC3IP PE=1 SV=1 - [HOP2_HUMAN]	PSMC3IP	203.56	34.1	1	7	7	8	217	24.9	7.81	0.894	-0.162	8	14.3	0.786	-0.347	8	9.6	-0.251539	11.95	0.915	-0.128	8	8	0.911	-0.134	8	25.5	-0.131313	16.75	0.798	-0.326	8	12.8	0.765	-0.386	8	10.1	-0.355682	11.45	4	FALSE	FALSE	TRUE	FALSE	1.006	0.009	8
Q9BWT6	Meiotic nuclear division protein 1 homolog OS=Homo sapiens GN=MND1 PE=1 SV=1 - [MND1_HUMAN]	MND1	148.16	22.93	1	5	5	6	205	23.7	8.19	0.813	-0.299	6	23.5	0.755	-0.405	6	23.7	-0.351074	23.6	0.816	-0.293	6	18.1	0.839	-0.253	6	3.7	-0.273169	10.9	0.642	-0.639	6	21.5	0.588	-0.766	6	28.6	-0.701342	25.05	5	FALSE	FALSE	TRUE	FALSE	0.939	-0.091	6
Q15149	Plectin OS=Homo sapiens GN=PLEC PE=1 SV=3 - [PLEC_HUMAN]	PLEC	11652.9	54.4	1	262	267	556	4684	531.5	5.96	0.995	-0.007	544	28.4	0.984	-0.023	544	27.6	-0.0152284	28	0.942	-0.086	544	16	0.987	-0.019	544	17.7	-0.0521469	16.85	0.923	-0.116	544	26.1	0.965	-0.051	544	23.2	-0.0831412	24.65	0	FALSE	FALSE	TRUE	FALSE	0.988	-0.017	544
P50552	Vasodilator-stimulated phosphoprotein OS=Homo sapiens GN=VASP PE=1 SV=3 - [VASP_HUMAN]	VASP	1336.26	51.32	1	24	24	52	380	39.8	8.94	0.983	-0.025	51	17.6	1.123	0.167	51	24.1	0.0745054	20.85	0.901	-0.15	51	17.6	0.85	-0.234	51	29.9	-0.191821	23.75	0.899	-0.154	51	16.3	0.958	-0.062	51	22.3	-0.107026	19.3	0	FALSE	FALSE	TRUE	FALSE	0.95	-0.074	51
P55290	Cadherin-13 OS=Homo sapiens GN=CDH13 PE=1 SV=1 - [CAD13_HUMAN]	CDH13	27.95	1.26	1	1	1	1	713	78.2	4.98	1.516	0.6	1	NA	1.123	0.167	1	NA	0.399991	NA	0.958	-0.062	1	NA	0.847	-0.24	1	NA	-0.148001	NA	1.439	0.525	1	NA	0.947	-0.079	1	NA	0.254594	NA		FALSE	FALSE	FALSE		1.284	0.361	1
P55285	Cadherin-6 OS=Homo sapiens GN=CDH6 PE=1 SV=1 - [CADH6_HUMAN]	CDH6	618.79	15.19	1	8	9	19	790	88.3	4.93	0.922	-0.117	18	10.6	0.973	-0.039	18	12.5	-0.0778022	11.55	0.906	-0.142	18	17.7	0.88	-0.184	18	14.3	-0.163268	16	0.813	-0.299	18	23.6	0.807	-0.309	18	21.8	-0.304006	22.7	5	FALSE	FALSE	TRUE	FALSE	1.008	0.011	18
Q7Z5N4	Protein sidekick-1 OS=Homo sapiens GN=SDK1 PE=2 SV=3 - [SDK1_HUMAN]	SDK1	43.87	0.45	1	1	1	1	2213	242	6.39	0.976	-0.035	1	NA	1.047	0.066	1	NA	0.0164963	NA	1.143	0.193	1	NA	1.047	0.066	1	NA	0.130931	NA	1.107	0.147	1	NA	1.091	0.126	1	NA	0.136191	NA		FALSE	FALSE	FALSE		0.924	-0.114	1
Q58EX2	Protein sidekick-2 OS=Homo sapiens GN=SDK2 PE=1 SV=3 - [SDK2_HUMAN]	SDK2	225	4.56	1	8	8	11	2172	239.2	7.06	0.89	-0.168	11	10.5	1.01	0.014	11	16.6	-0.0740006	13.55	0.773	-0.371	11	11.8	0.807	-0.309	11	10.8	-0.340075	11.3	0.805	-0.313	11	23	0.801	-0.32	11	22.2	-0.316528	22.6	5	FALSE	FALSE	TRUE	FALSE	0.937	-0.094	11
Q8NI35	InaD-like protein OS=Homo sapiens GN=PATJ PE=1 SV=3 - [INADL_HUMAN]	PATJ	75.79	3.83	1	4	4	4	1801	196.2	4.94	0.963	-0.054	4	21.7	0.818	-0.29	4	11.6	-0.167312	16.65	0.927	-0.109	4	4.1	1.027	0.038	4	9.6	-0.0335695	6.85	0.883	-0.18	4	11.1	0.872	-0.198	4	24.7	-0.188529	17.9	0	FALSE	FALSE	TRUE	FALSE	1.087	0.12	4
Q8N3R9	MAGUK p55 subfamily member 5 OS=Homo sapiens GN=MPP5 PE=1 SV=3 - [MPP5_HUMAN]	MPP5	425.58	20.89	2	9	9	15	675	77.2	6.14	0.978	-0.032	15	20.7	1	0	15	17.3	-0.0159576	19	0.801	-0.32	15	5.3	0.769	-0.379	15	11.8	-0.349235	8.55	0.891	-0.167	15	24.4	0.775	-0.368	15	21.5	-0.263612	22.95	5	FALSE	FALSE	TRUE	FALSE	0.995	-0.007	15
Q9BYG4	Partitioning defective 6 homolog gamma OS=Homo sapiens GN=PARD6G PE=1 SV=1 - [PAR6G_HUMAN]	PARD6G	119.21	16.22	2	4	7	7	376	40.9	8.22	0.892	-0.165	4	11.3	0.895	-0.16	4	10.9	-0.16246	11.1	0.902	-0.149	4	18.6	0.976	-0.035	4	11.1	-0.0908029	14.85	0.802	-0.318	4	23.4	0.836	-0.258	4	5.3	-0.288065	14.35	0	FALSE	FALSE	TRUE	FALSE	0.974	-0.038	4
Q9BYG5	Partitioning defective 6 homolog beta OS=Homo sapiens GN=PARD6B PE=1 SV=1 - [PAR6B_HUMAN]	PARD6B	279.74	36.02	2	6	9	12	372	41.2	5.58	0.911	-0.134	8	23.5	0.936	-0.095	8	10.4	-0.114816	16.95	0.954	-0.068	8	21	1.051	0.072	8	14.2	0.00360224	17.6	0.937	-0.094	8	13.3	1.003	0.004	8	5.6	-0.0439433	9.45	0	FALSE	FALSE	TRUE	FALSE	0.978	-0.032	8
P56747	Claudin-6 OS=Homo sapiens GN=CLDN6 PE=1 SV=2 - [CLD6_HUMAN]	CLDN6	36.35	8.18	1	1	1	2	220	23.3	8	1.155	0.208	2	1.3	1.592	0.671	2	6.7	0.457857	4	0.927	-0.109	2	9.7	0.732	-0.45	2	1.1	-0.269686	5.4	1.061	0.085	2	11	1.16	0.214	2	7.8	0.151209	9.4		FALSE	FALSE	FALSE		0.997	-0.004	2
Q8TEW0	Partitioning defective 3 homolog OS=Homo sapiens GN=PARD3 PE=1 SV=2 - [PARD3_HUMAN]	PARD3	399.72	14.38	2	16	16	20	1356	151.3	7.68	1.026	0.037	20	20.8	0.921	-0.119	20	17	-0.0387471	18.9	0.963	-0.054	20	22.5	0.979	-0.031	20	16.6	-0.0424568	19.55	1.107	0.147	20	24.9	0.934	-0.099	20	18.5	0.0292762	21.7	0	FALSE	FALSE	TRUE	FALSE	1.037	0.052	20
P55283	Cadherin-4 OS=Homo sapiens GN=CDH4 PE=2 SV=2 - [CADH4_HUMAN]	CDH4	28.61	1.31	1	1	1	1	916	100.2	4.82	0.817	-0.292	1	NA	1.023	0.033	1	NA	-0.120294	NA	1.64	0.714	1	NA	1.493	0.578	1	NA	0.647545	NA	1.328	0.409	1	NA	1.521	0.605	1	NA	0.510456	NA		FALSE	FALSE	FALSE		0.876	-0.191	1
P13647	Keratin, type II cytoskeletal 5 OS=Homo sapiens GN=KRT5 PE=1 SV=3 - [K2C5_HUMAN]	KRT5	148.11	6.44	11	1	5	27	590	62.3	7.74	0.973	-0.039	1	NA	0.782	-0.355	1	NA	-0.188529	NA	0.933	-0.1	1	NA	0.784	-0.351	1	NA	-0.22011	NA	0.9	-0.152	1	NA	0.61	-0.713	1	NA	-0.405451	NA		FALSE	TRUE	FALSE		1.323	0.404	1
P19022	Cadherin-2 OS=Homo sapiens GN=CDH2 PE=1 SV=4 - [CADH2_HUMAN]	CDH2	1555.08	27.7	1	16	16	59	906	99.7	4.81	0.926	-0.111	59	28.9	1.002	0.003	59	15.5	-0.0528949	22.2	1.077	0.107	59	13.4	1.087	0.12	59	14.1	0.1137	13.75	1.005	0.007	59	23.1	1.087	0.12	59	19.7	0.0648829	21.4	0	FALSE	FALSE	TRUE	FALSE	0.971	-0.042	59
P23229	Integrin alpha-6 OS=Homo sapiens GN=ITGA6 PE=1 SV=5 - [ITA6_HUMAN]	ITGA6	276.16	9.56	1	9	9	12	1130	126.5	6.61	0.788	-0.344	12	10	0.86	-0.218	12	3	-0.279284	6.5	0.898	-0.155	12	14.3	0.824	-0.279	12	13	-0.215915	13.65	0.734	-0.446	12	15.7	0.759	-0.398	12	30.5	-0.421786	23.1	5	FALSE	FALSE	TRUE	FALSE	0.927	-0.109	12
P12814	Alpha-actinin-1 OS=Homo sapiens GN=ACTN1 PE=1 SV=2 - [ACTN1_HUMAN]	ACTN1	9984.96	69.06	2	41	64	409	892	103	5.41	0.897	-0.157	257	25.5	0.964	-0.053	257	37.3	-0.103922	31.4	0.642	-0.639	257	29.4	0.722	-0.47	257	27.2	-0.552156	28.3	0.622	-0.685	257	31.1	0.741	-0.432	257	22.6	-0.553214	26.85	5	FALSE	FALSE	TRUE	FALSE	0.943	-0.085	257
Q08722	Leukocyte surface antigen CD47 OS=Homo sapiens GN=CD47 PE=1 SV=1 - [CD47_HUMAN]	CD47	226.8	8.67	1	4	4	11	323	35.2	7.21	1.697	0.763	11	74.8	1.425	0.511	11	84.4	0.642471	79.6	0.781	-0.357	11	14.5	0.817	-0.292	11	18.3	-0.323733	16.4	1.414	0.5	11	44.5	1.471	0.557	11	41.2	0.528571	42.85	3	FALSE	FALSE	TRUE	FALSE	1.053	0.075	11
O14936	Peripheral plasma membrane protein CASK OS=Homo sapiens GN=CASK PE=1 SV=3 - [CSKP_HUMAN]	CASK	514.32	24.3	1	21	21	32	926	105.1	6.43	1.245	0.316	32	25.7	1.228	0.296	32	21.6	0.306262	23.65	1.184	0.244	32	14.7	1.226	0.294	32	17.4	0.269033	16.05	1.39	0.475	32	22.5	1.48	0.566	32	23.2	0.521051	22.85	3	FALSE	FALSE	TRUE	FALSE	0.995	-0.007	32
Q03001	Dystonin OS=Homo sapiens GN=DST PE=1 SV=4 - [DYST_HUMAN]	DST	2743.26	16.12	1	92	98	139	7570	860.1	5.25	0.968	-0.047	130	22.1	0.927	-0.109	130	20.1	-0.0778022	21.1	1.209	0.274	130	22	1.29	0.367	130	22.5	0.321351	22.25	1.175	0.233	130	35	1.206	0.27	130	27.2	0.251568	31.1	1	FALSE	FALSE	TRUE	FALSE	1.003	0.004	130
P48509	CD151 antigen OS=Homo sapiens GN=CD151 PE=1 SV=3 - [CD151_HUMAN]	CD151	97.29	9.49	1	3	3	6	253	28.3	7.47	1.075	0.104	6	6.4	1.097	0.134	6	15.1	0.119024	10.75	0.912	-0.133	6	5.7	0.871	-0.199	6	6.1	-0.165693	5.9	0.954	-0.068	6	14.4	0.938	-0.092	6	11.4	-0.0800879	12.9	0	FALSE	FALSE	TRUE	FALSE	1.013	0.019	6
Q14315	Filamin-C OS=Homo sapiens GN=FLNC PE=1 SV=3 - [FLNC_HUMAN]	FLNC	5972.58	33.1	1	73	91	270	2725	290.8	5.97	1.08	0.111	212	30.1	1.105	0.144	212	33.7	0.127633	31.9	0.748	-0.419	212	28.6	0.771	-0.375	212	31.7	-0.396878	30.15	0.864	-0.211	212	26.9	0.896	-0.158	212	25.4	-0.184425	26.15	6	FALSE	FALSE	TRUE	FALSE	0.988	-0.017	212
Q8WUP2	Filamin-binding LIM protein 1 OS=Homo sapiens GN=FBLIM1 PE=1 SV=2 - [FBLI1_HUMAN]	FBLIM1	361.93	27.88	1	11	11	15	373	40.6	6.02	1.047	0.066	15	19.9	0.881	-0.183	15	19.3	-0.0528949	19.6	1.015	0.021	15	18.3	1.15	0.202	15	37.4	0.114367	27.85	1.064	0.089	15	16.3	1.023	0.033	15	14.3	0.0614306	15.3	0	FALSE	FALSE	TRUE	FALSE	1.069	0.096	15
Q96AC1	Fermitin family homolog 2 OS=Homo sapiens GN=FERMT2 PE=1 SV=1 - [FERM2_HUMAN]	FERMT2	949.96	43.24	2	25	25	46	680	77.8	6.7	1.145	0.195	46	21.6	1.189	0.25	46	28	0.222805	24.8	0.971	-0.042	46	17.2	0.953	-0.069	46	16	-0.0558912	16.6	1.095	0.131	46	17	1.116	0.158	46	23.8	0.144699	20.4	0	FALSE	FALSE	TRUE	FALSE	1.002	0.003	46
Q13418	Integrin-linked protein kinase OS=Homo sapiens GN=ILK PE=1 SV=2 - [ILK_HUMAN]	ILK	939.5	43.36	1	22	22	55	452	51.4	8.07	0.992	-0.012	54	24	1.059	0.083	54	27.6	0.0363275	25.8	0.846	-0.241	54	15	0.818	-0.29	54	20.1	-0.265345	17.55	0.817	-0.292	54	19	0.853	-0.229	54	25	-0.260152	22	0	FALSE	FALSE	TRUE	FALSE	0.978	-0.032	54
Q15404	Ras suppressor protein 1 OS=Homo sapiens GN=RSU1 PE=1 SV=3 - [RSU1_HUMAN]	RSU1	2035.09	54.15	1	14	14	64	277	31.5	8.65	1.132	0.179	64	21.4	1.086	0.119	64	25.9	0.149259	23.65	0.789	-0.342	64	14.1	0.808	-0.308	64	24.5	-0.324636	19.3	0.899	-0.154	64	18	0.904	-0.146	64	23	-0.149601	20.5	6	FALSE	FALSE	TRUE	FALSE	0.991	-0.013	64
P48059	LIM and senescent cell antigen-like-containing domain protein 1 OS=Homo sapiens GN=LIMS1 PE=1 SV=4 - [LIMS1_HUMAN]	LIMS1	347	27.38	2	8	8	13	325	37.2	8.05	1.146	0.197	13	39.1	1.067	0.094	13	33.2	0.146003	36.15	0.702	-0.51	13	12.9	0.869	-0.203	13	16.6	-0.348317	14.75	0.795	-0.331	13	22.4	0.83	-0.269	13	34.6	-0.29956	28.5	6	FALSE	FALSE	TRUE	FALSE	1.013	0.019	13
Q9NVD7	Alpha-parvin OS=Homo sapiens GN=PARVA PE=1 SV=1 - [PARVA_HUMAN]	PARVA	689.17	37.1	2	10	11	25	372	42.2	5.95	0.994	-0.009	24	24.6	1.038	0.054	24	34.5	0.0229004	29.55	0.777	-0.364	24	30.4	0.715	-0.484	24	31.7	-0.422752	31.05	0.707	-0.5	24	21.7	0.741	-0.432	24	20.6	-0.465938	21.15	5	FALSE	FALSE	TRUE	FALSE	0.94	-0.089	24
Q9UGQ3	Solute carrier family 2, facilitated glucose transporter member 6 OS=Homo sapiens GN=SLC2A6 PE=1 SV=2 - [GTR6_HUMAN]	SLC2A6	55.37	3.35	1	2	2	2	507	54.5	8.63	1.269	0.344	2	3	1.328	0.409	2	5.6	0.376846	4.3	1.089	0.123	2	8.7	1.136	0.184	2	2.8	0.153805	5.75	1.37	0.454	2	5.7	1.502	0.587	2	8.4	0.522056	7.05		FALSE	FALSE	FALSE		1.016	0.023	2
Q15185	Prostaglandin E synthase 3 OS=Homo sapiens GN=PTGES3 PE=1 SV=1 - [TEBP_HUMAN]	PTGES3	1150.81	45	1	10	10	62	160	18.7	4.54	0.898	-0.155	62	14.5	0.894	-0.162	62	29.7	-0.158429	22.1	0.915	-0.128	62	18.5	0.999	-0.001	62	22.8	-0.0634092	20.65	0.835	-0.26	62	24.3	0.845	-0.243	62	32.3	-0.251539	28.3	0	FALSE	FALSE	TRUE	FALSE	0.965	-0.051	62
Q8N122	Regulatory-associated protein of mTOR OS=Homo sapiens GN=RPTOR PE=1 SV=1 - [RPTOR_HUMAN]	RPTOR	235.13	10.79	1	10	10	11	1335	148.9	6.89	0.916	-0.127	11	20.7	0.941	-0.088	11	23.2	-0.107026	21.95	1.148	0.199	11	12.9	1.307	0.386	11	16.6	0.295723	14.75	1.001	0.001	11	7.7	1.139	0.188	11	10.7	0.0976108	9.2	0	FALSE	FALSE	TRUE	FALSE	0.998	-0.003	11
Q8WUX9	Charged multivesicular body protein 7 OS=Homo sapiens GN=CHMP7 PE=1 SV=1 - [CHMP7_HUMAN]	CHMP7	261.9	15.89	1	5	5	6	453	50.9	5.35	1.078	0.108	6	9	0.899	-0.154	6	25.9	-0.0166871	17.45	1.222	0.289	6	18.1	1.264	0.338	6	7.9	0.313826	13	1.212	0.277	6	21.8	1.007	0.01	6	31	0.14991	26.4	1	FALSE	FALSE	TRUE	FALSE	1.125	0.17	6
Q9UQN3	Charged multivesicular body protein 2b OS=Homo sapiens GN=CHMP2B PE=1 SV=1 - [CHM2B_HUMAN]	CHMP2B	423.03	38.97	1	10	10	20	213	23.9	8.76	1.036	0.051	20	27.4	0.951	-0.072	20	10.3	-0.00940813	18.85	1.486	0.571	20	14.4	1.508	0.593	20	10.4	0.582074	12.4	1.465	0.551	20	20.6	1.386	0.471	20	12.4	0.511468	16.5	1	FALSE	FALSE	TRUE	FALSE	1.068	0.095	20
Q96FZ7	Charged multivesicular body protein 6 OS=Homo sapiens GN=CHMP6 PE=1 SV=3 - [CHMP6_HUMAN]	CHMP6	133.72	13.93	1	3	3	5	201	23.5	5.31	0.827	-0.274	5	5.5	0.72	-0.474	5	7.4	-0.370527	6.45	1.142	0.192	5	22.9	1.423	0.509	5	1.1	0.358959	12	0.898	-0.155	5	23.7	1.063	0.088	5	12.6	-0.0284105	18.15		FALSE	FALSE	TRUE	TRUE	1.051	0.072	5
Q9Y3E7	Charged multivesicular body protein 3 OS=Homo sapiens GN=CHMP3 PE=1 SV=3 - [CHMP3_HUMAN]	CHMP3	45.64	9.91	1	3	3	7	222	25.1	5.12	0.899	-0.154	7	42.1	0.851	-0.233	7	47.6	-0.192645	44.85	0.92	-0.12	7	15.2	0.909	-0.138	7	23.3	-0.128945	19.25	0.74	-0.434	7	15.8	0.652	-0.617	7	18.3	-0.522841	17.05	5	FALSE	FALSE	TRUE	FALSE	1.076	0.106	7
Q9BY43	Charged multivesicular body protein 4a OS=Homo sapiens GN=CHMP4A PE=1 SV=3 - [CHM4A_HUMAN]	CHMP4A	288.21	40.99	1	11	11	16	222	25.1	4.7	1.146	0.197	16	6.3	1.058	0.081	16	14.3	0.140124	10.3	0.985	-0.022	16	21.9	1.025	0.036	16	7.8	0.0071955	14.85	1.035	0.05	16	23.5	1.068	0.095	16	13.8	0.0724489	18.65	0	FALSE	FALSE	TRUE	FALSE	0.979	-0.031	16
Q9H444	Charged multivesicular body protein 4b OS=Homo sapiens GN=CHMP4B PE=1 SV=1 - [CHM4B_HUMAN]	CHMP4B	1359.17	58.48	3	16	16	69	224	24.9	4.82	0.98	-0.029	69	39.1	1.017	0.024	69	39.4	-0.00216567	39.25	0.948	-0.077	69	19.6	0.95	-0.074	69	19.4	-0.07552	19.5	0.998	-0.003	69	34.8	1	0	69	25	-0.00144342	29.9	0	FALSE	FALSE	TRUE	FALSE	0.966	-0.05	69
O43633	Charged multivesicular body protein 2a OS=Homo sapiens GN=CHMP2A PE=1 SV=1 - [CHM2A_HUMAN]	CHMP2A	448.07	38.29	2	12	12	23	222	25.1	5.97	1.113	0.154	18	9.4	1.067	0.094	18	20.8	0.124328	15.1	0.967	-0.048	18	6.4	0.956	-0.065	18	10.5	-0.0566412	8.45	1.091	0.126	18	10.8	1.01	0.014	18	14.1	0.0710762	12.45	0	FALSE	FALSE	TRUE	FALSE	1.008	0.011	18
Q676U5	Autophagy-related protein 16-1 OS=Homo sapiens GN=ATG16L1 PE=1 SV=2 - [A16L1_HUMAN]	ATG16L1	198.54	17.46	1	8	9	13	607	68.2	6.64	0.994	-0.009	12	14.1	0.986	-0.02	12	15.2	-0.0144996	14.65	0.943	-0.085	12	13.7	1.033	0.047	12	24.6	-0.0174171	19.15	0.951	-0.072	12	15.9	1.036	0.051	12	22.5	-0.00940813	19.2	0	FALSE	FALSE	TRUE	FALSE	0.965	-0.051	12
Q9P2Y5	UV radiation resistance-associated gene protein OS=Homo sapiens GN=UVRAG PE=1 SV=1 - [UVRAG_HUMAN]	UVRAG	64.36	3	1	1	1	1	699	78.1	8.29	1.199	0.262	1	NA	1.077	0.107	1	NA	0.186501	NA	1.118	0.161	1	NA	1.157	0.21	1	NA	0.185867	NA	1.329	0.41	1	NA	1.239	0.309	1	NA	0.360645	NA		FALSE	FALSE	FALSE		1.046	0.065	1
Q8WYN0	Cysteine protease ATG4A OS=Homo sapiens GN=ATG4A PE=1 SV=1 - [ATG4A_HUMAN]	ATG4A	27.29	2.26	1	1	1	1	398	45.3	5.05	1.018	0.026	1	NA	1.165	0.22	1	NA	0.126312	NA	0.752	-0.411	1	NA	0.722	-0.47	1	NA	-0.440263	NA	0.759	-0.398	1	NA	0.836	-0.258	1	NA	-0.326444	NA		FALSE	FALSE	FALSE		0.908	-0.139	1
Q9Y4P1	Cysteine protease ATG4B OS=Homo sapiens GN=ATG4B PE=1 SV=2 - [ATG4B_HUMAN]	ATG4B	228.38	18.83	1	5	5	6	393	44.3	5.07	1.09	0.124	6	30.5	1.195	0.257	6	11.4	0.192194	20.95	1.032	0.045	6	31.2	1.128	0.174	6	17.9	0.111031	24.55	1.045	0.064	6	16	1.224	0.292	6	18.7	0.182057	17.35	0	FALSE	FALSE	TRUE	FALSE	0.899	-0.154	6
Q9NT62	Ubiquitin-like-conjugating enzyme ATG3 OS=Homo sapiens GN=ATG3 PE=1 SV=1 - [ATG3_HUMAN]	ATG3	436.77	26.11	1	9	9	20	314	35.8	4.74	0.925	-0.112	20	12.1	0.968	-0.047	20	8.3	-0.0793256	10.2	1.013	0.019	20	10.3	1.069	0.096	20	8.5	0.0579701	9.4	0.915	-0.128	20	9.1	1.072	0.1	20	10.8	-0.00940813	9.95	0	FALSE	FALSE	TRUE	FALSE	0.951	-0.072	20
Q9Y484	WD repeat domain phosphoinositide-interacting protein 4 OS=Homo sapiens GN=WDR45 PE=2 SV=1 - [WIPI4_HUMAN]	WDR45	93.19	8.33	1	3	3	4	360	39.8	7.14	0.782	-0.355	4	5.1	0.78	-0.358	4	12.6	-0.356606	8.85	1.123	0.167	4	11	1.182	0.241	4	4.8	0.204767	7.9	0.929	-0.106	4	1.3	0.894	-0.162	4	3.9	-0.133685	2.6	4	FALSE	FALSE	TRUE	FALSE	0.989	-0.016	4
Q9BSB4	Autophagy-related protein 101 OS=Homo sapiens GN=ATG101 PE=1 SV=1 - [ATGA1_HUMAN]	ATG101	117.48	33.49	1	5	5	6	218	25	6.15	0.865	-0.209	5	24.2	0.925	-0.112	5	3.4	-0.16004	13.8	0.92	-0.12	5	9.5	0.756	-0.404	5	7.4	-0.254978	8.45	0.788	-0.344	5	11.4	0.752	-0.411	5	19	-0.37707	15.2	5	FALSE	FALSE	TRUE	FALSE	0.953	-0.069	5
Q7Z3C6	Autophagy-related protein 9A OS=Homo sapiens GN=ATG9A PE=1 SV=3 - [ATG9A_HUMAN]	ATG9A	142.78	5.84	1	3	3	5	839	94.4	6.67	1.189	0.25	5	12.2	0.969	-0.045	5	19.3	0.109695	15.75	0.916	-0.127	5	5.5	0.979	-0.031	5	13	-0.0778022	9.25	1.044	0.062	5	5.5	0.981	-0.028	5	10.4	0.0179219	7.95	0	FALSE	FALSE	TRUE	FALSE	0.983	-0.025	5
Q5MNZ6	WD repeat domain phosphoinositide-interacting protein 3 OS=Homo sapiens GN=WDR45B PE=2 SV=2 - [WIPI3_HUMAN]	WDR45B	89.12	15.12	1	4	4	5	344	38.1	7.59	1.001	0.001	5	11.7	0.982	-0.026	5	11.8	-0.0123153	11.75	1.029	0.041	5	14.3	1.07	0.098	5	0.9	0.0697022	7.6	1.007	0.01	5	6.6	1.079	0.11	5	5.6	0.0607392	6.1	0	FALSE	FALSE	TRUE	FALSE	0.987	-0.019	5
Q8TDY2	RB1-inducible coiled-coil protein 1 OS=Homo sapiens GN=RB1CC1 PE=1 SV=3 - [RBCC1_HUMAN]	RB1CC1	376.62	11.98	1	13	14	14	1594	183	5.41	1.108	0.148	13	14.4	1.132	0.179	13	18.8	0.163499	16.6	1.052	0.073	13	9.1	1.1	0.138	13	11	0.105678	10.05	1.138	0.187	13	10.7	1.112	0.153	13	12	0.169925	11.35	0	FALSE	FALSE	TRUE	FALSE	1.019	0.027	13
O75143	Autophagy-related protein 13 OS=Homo sapiens GN=ATG13 PE=1 SV=1 - [ATG13_HUMAN]	ATG13	38.19	4.64	1	2	2	2	517	56.5	5.12	0.968	-0.047	2	25.3	1.087	0.12	2	37.8	0.0391384	31.55	1.013	0.019	2	6.8	0.903	-0.147	2	10.1	-0.0619024	8.45	0.971	-0.042	2	18.2	0.977	-0.034	2	26.9	-0.0380063	22.55		FALSE	FALSE	FALSE		0.97	-0.044	2
Q9Y4P8	WD repeat domain phosphoinositide-interacting protein 2 OS=Homo sapiens GN=WIPI2 PE=1 SV=1 - [WIPI2_HUMAN]	WIPI2	212.51	17.84	1	5	5	6	454	49.4	6.46	1.02	0.029	6	28.3	1.038	0.054	6	4.6	0.041243	16.45	1.123	0.167	6	12.3	1.134	0.181	6	22.9	0.174406	17.6	1.161	0.215	6	21.1	1.266	0.34	6	13	0.279174	17.05	0	FALSE	FALSE	TRUE	FALSE	1.014	0.02	6
Q14457	Beclin-1 OS=Homo sapiens GN=BECN1 PE=1 SV=2 - [BECN1_HUMAN]	BECN1	184.4	18.67	1	7	7	9	450	51.9	4.89	1.018	0.026	9	19.4	1.03	0.043	9	15.7	0.0342157	17.55	1.168	0.224	9	9	1.063	0.088	9	7.6	0.157691	8.3	1.189	0.25	9	9.6	1.067	0.094	9	12.5	0.173767	11.05	0	FALSE	FALSE	TRUE	FALSE	1.043	0.061	9
Q96EB6	NAD-dependent protein deacetylase sirtuin-1 OS=Homo sapiens GN=SIRT1 PE=1 SV=2 - [SIR1_HUMAN]	SIRT1	242.81	10.44	1	6	6	7	747	81.6	4.67	0.831	-0.267	7	21.2	0.866	-0.208	7	17.6	-0.237013	19.4	1.011	0.016	7	15.7	1.068	0.095	7	7.2	0.0558898	11.45	0.802	-0.318	7	22.2	0.906	-0.142	7	13.9	-0.227692	18.05	0	FALSE	FALSE	TRUE	FALSE	0.905	-0.144	7
P54198	Protein HIRA OS=Homo sapiens GN=HIRA PE=1 SV=2 - [HIRA_HUMAN]	HIRA	77.61	5.01	1	3	3	5	1017	111.8	8.07	0.995	-0.007	5	14.5	0.958	-0.062	5	10.1	-0.0343081	12.3	1.178	0.236	5	12.8	1.14	0.189	5	5	0.212881	8.9	1.136	0.184	5	25.9	1.05	0.07	5	2	0.128293	13.95	0	FALSE	FALSE	TRUE	FALSE	1.076	0.106	5
Q9Y294	Histone chaperone ASF1A OS=Homo sapiens GN=ASF1A PE=1 SV=1 - [ASF1A_HUMAN]	ASF1A	193.76	13.73	1	1	2	8	204	23	4.41	0.886	-0.175	2	8.2	1.08	0.111	2	31.2	-0.0247367	19.7	1.081	0.112	2	0.5	1.093	0.128	2	8.4	0.120352	4.45	0.949	-0.076	2	7.8	1.175	0.233	2	40.4	0.0867838	24.1		FALSE	FALSE	FALSE		0.918	-0.123	2
P52926	High mobility group protein HMGI-C OS=Homo sapiens GN=HMGA2 PE=1 SV=1 - [HMGA2_HUMAN]	HMGA2	1581.4	64.22	1	9	9	61	109	11.8	10.62	0.943	-0.085	60	70.7	0.97	-0.044	60	52.6	-0.0641631	61.65	1.039	0.055	60	27.1	0.942	-0.086	60	29.7	-0.0137711	28.4	0.857	-0.223	60	42.5	0.88	-0.184	60	30.1	-0.203402	36.3	0	FALSE	FALSE	TRUE	FALSE	0.975	-0.037	60
Q9NPG3	Ubinuclein-1 OS=Homo sapiens GN=UBN1 PE=1 SV=2 - [UBN1_HUMAN]	UBN1	42.71	1.06	1	1	1	1	1134	121.4	9.33	0.566	-0.821	1	NA	0.612	-0.708	1	NA	-0.76366	NA	0.82	-0.286	1	NA	0.829	-0.271	1	NA	-0.278409	NA	0.46	-1.12	1	NA	0.505	-0.986	1	NA	-1.0514	NA		FALSE	FALSE	FALSE		1.056	0.079	1
Q9Y6J0	Calcineurin-binding protein cabin-1 OS=Homo sapiens GN=CABIN1 PE=1 SV=1 - [CABIN_HUMAN]	CABIN1	58.54	0.77	1	1	2	2	2220	246.2	6.02	0.856	-0.224	1	NA	0.851	-0.233	1	NA	-0.228537	NA	1.074	0.103	1	NA	1.289	0.366	1	NA	0.24062	NA	0.911	-0.134	1	NA	1.092	0.127	1	NA	0.00216242	NA		FALSE	FALSE	FALSE		0.948	-0.077	1
O75506	Heat shock factor-binding protein 1 OS=Homo sapiens GN=HSBP1 PE=1 SV=1 - [HSBP1_HUMAN]	HSBP1	854.08	90.79	1	7	7	24	76	8.5	4.36	1.048	0.068	24	40.9	0.978	-0.032	24	29.2	0.0186342	35.05	0.961	-0.057	24	15.4	0.949	-0.076	24	22.1	-0.0664274	18.75	0.973	-0.039	24	30.6	0.992	-0.012	24	22.2	-0.0254707	26.4	0	FALSE	FALSE	TRUE	FALSE	1.002	0.003	24
Q9UJY1	Heat shock protein beta-8 OS=Homo sapiens GN=HSPB8 PE=1 SV=1 - [HSPB8_HUMAN]	HSPB8	91.3	23.47	1	4	4	6	196	21.6	5.12	1.12	0.163	6	50.8	1.764	0.819	6	136.2	0.528071	93.5	0.751	-0.413	6	17.9	0.477	-1.068	6	85.2	-0.703689	51.55	0.989	-0.016	6	15.3	0.862	-0.214	6	20	-0.111695	17.65		FALSE	FALSE	TRUE	TRUE	1.078	0.108	6
Q8WW22	DnaJ homolog subfamily A member 4 OS=Homo sapiens GN=DNAJA4 PE=1 SV=1 - [DNJA4_HUMAN]	DNAJA4	75.1	6.3	1	1	3	3	397	44.8	7.59	0.999	-0.001	1	NA	0.818	-0.29	1	NA	-0.138442	NA	0.927	-0.109	1	NA	1.191	0.252	1	NA	0.0827026	NA	0.918	-0.123	1	NA	0.969	-0.045	1	NA	-0.0839056	NA		FALSE	FALSE	FALSE		0.954	-0.068	1
O60884	DnaJ homolog subfamily A member 2 OS=Homo sapiens GN=DNAJA2 PE=1 SV=1 - [DNJA2_HUMAN]	DNAJA2	1176.99	41.5	1	18	18	48	412	45.7	6.48	0.988	-0.017	48	16.3	0.972	-0.041	48	14.5	-0.0291463	15.4	0.87	-0.201	48	20.5	0.956	-0.065	48	19.7	-0.131313	20.1	0.821	-0.285	48	18.3	0.902	-0.149	48	18.5	-0.215077	18.4	0	FALSE	FALSE	TRUE	FALSE	0.948	-0.077	48
P31948	Stress-induced-phosphoprotein 1 OS=Homo sapiens GN=STIP1 PE=1 SV=1 - [STIP1_HUMAN]	STIP1	5652.68	72.93	1	62	62	290	543	62.6	6.8	1.028	0.04	290	38.7	1.013	0.019	290	37.7	0.0292762	38.2	0.913	-0.131	290	27.8	0.928	-0.108	290	30.7	-0.11951	29.25	0.917	-0.125	290	29.3	0.964	-0.053	290	25.4	-0.0885002	27.35	0	FALSE	FALSE	TRUE	FALSE	0.96	-0.059	290
P31689	DnaJ homolog subfamily A member 1 OS=Homo sapiens GN=DNAJA1 PE=1 SV=2 - [DNJA1_HUMAN]	DNAJA1	2225.44	59.95	3	29	31	91	397	44.8	7.08	0.925	-0.112	80	31.2	0.901	-0.15	80	38.1	-0.131313	34.65	0.831	-0.267	80	25.8	0.931	-0.103	80	29.5	-0.182786	27.65	0.778	-0.362	80	29.5	0.865	-0.209	80	32	-0.283668	30.75	0	FALSE	FALSE	TRUE	FALSE	0.952	-0.071	80
P41134	DNA-binding protein inhibitor ID-1 OS=Homo sapiens GN=ID1 PE=1 SV=3 - [ID1_HUMAN]	ID1	39.99	6.45	1	1	1	1	155	16.1	6.99	0.649	-0.624	1	NA	0.522	-0.938	1	NA	-0.772259	NA	1.089	0.123	1	NA	0.812	-0.3	1	NA	-0.0732415	NA	0.7	-0.515	1	NA	0.422	-1.245	1	NA	-0.833927	NA		FALSE	FALSE	FALSE		1.104	0.143	1
P50502	Hsc70-interacting protein OS=Homo sapiens GN=ST13 PE=1 SV=2 - [F10A1_HUMAN]	ST13	1805.76	38.21	3	18	18	74	369	41.3	5.27	0.975	-0.037	74	28.7	0.978	-0.032	74	29.8	-0.0343081	29.25	0.883	-0.18	74	23.6	0.98	-0.029	74	21.7	-0.102372	22.65	0.894	-0.162	74	27.9	0.992	-0.012	74	27.4	-0.0846703	27.65	0	FALSE	FALSE	TRUE	FALSE	0.97	-0.044	74
Q0VDF9	Heat shock 70 kDa protein 14 OS=Homo sapiens GN=HSPA14 PE=1 SV=1 - [HSP7E_HUMAN]	HSPA14	229.81	26.72	1	10	10	14	509	54.8	5.59	0.96	-0.059	14	17.7	0.981	-0.028	14	21.8	-0.0431999	19.75	0.84	-0.252	14	21.7	0.866	-0.208	14	24.6	-0.229382	23.15	0.825	-0.278	14	8.7	0.824	-0.279	14	12	-0.278409	10.35	0	FALSE	FALSE	TRUE	FALSE	0.979	-0.031	14
O95816	BAG family molecular chaperone regulator 2 OS=Homo sapiens GN=BAG2 PE=1 SV=1 - [BAG2_HUMAN]	BAG2	578.58	52.61	1	14	14	31	211	23.8	6.7	0.97	-0.044	31	24.4	0.899	-0.154	31	23.4	-0.0977334	23.9	0.716	-0.482	31	18.9	0.809	-0.306	31	19.6	-0.391191	19.25	0.713	-0.488	31	35.7	0.67	-0.578	31	21	-0.532199	28.35	5	FALSE	FALSE	TRUE	FALSE	0.992	-0.012	31
O43301	Heat shock 70 kDa protein 12A OS=Homo sapiens GN=HSPA12A PE=1 SV=2 - [HS12A_HUMAN]	HSPA12A	700.27	20.3	1	12	12	25	675	74.9	6.77	1.376	0.46	25	15.9	1.278	0.354	25	25.1	0.408168	20.5	1.384	0.469	25	16.8	1.56	0.642	25	16.1	0.557778	16.45	1.767	0.821	25	28.3	1.976	0.983	25	19.5	0.904195	23.9	2	FALSE	FALSE	TRUE	FALSE	1.022	0.031	25
Q8N163	Cell cycle and apoptosis regulator protein 2 OS=Homo sapiens GN=CCAR2 PE=1 SV=2 - [CCAR2_HUMAN]	CCAR2	2772.85	41.93	1	36	37	106	923	102.8	5.22	0.954	-0.068	105	26.4	0.973	-0.039	105	25.1	-0.0536434	25.75	1.024	0.034	105	13.9	1.125	0.17	105	13.2	0.103665	13.55	0.969	-0.045	105	19.7	1.108	0.148	105	19.2	0.0545012	19.45	0	FALSE	FALSE	TRUE	FALSE	0.944	-0.083	105
Q99615	DnaJ homolog subfamily C member 7 OS=Homo sapiens GN=DNAJC7 PE=1 SV=2 - [DNJC7_HUMAN]	DNAJC7	1640.2	64.78	1	33	33	74	494	56.4	6.96	0.852	-0.231	74	25.7	0.906	-0.142	74	23.3	-0.186065	24.5	0.822	-0.283	74	13.8	0.839	-0.253	74	22.5	-0.267948	18.15	0.724	-0.466	74	24.9	0.705	-0.504	74	25.8	-0.484994	25.35	5	FALSE	FALSE	TRUE	FALSE	0.96	-0.059	74
Q99933	BAG family molecular chaperone regulator 1 OS=Homo sapiens GN=BAG1 PE=1 SV=4 - [BAG1_HUMAN]	BAG1	46.98	7.25	1	2	2	2	345	38.8	7.81	1.029	0.041	2	20.5	1.048	0.068	2	2.6	0.0545012	11.55	0.886	-0.175	2	0.9	0.932	-0.102	2	0.2	-0.137648	0.55	0.903	-0.147	2	19.6	0.972	-0.041	2	2.8	-0.0931094	11.2		FALSE	FALSE	FALSE		1.027	0.038	2
O95757	Heat shock 70 kDa protein 4L OS=Homo sapiens GN=HSPA4L PE=1 SV=3 - [HS74L_HUMAN]	HSPA4L	4039.77	73.42	1	45	56	170	839	94.5	5.88	1.151	0.203	118	30.9	1.091	0.126	118	34	0.164786	32.45	0.914	-0.13	118	12.9	0.925	-0.112	118	18.3	-0.121079	15.6	1.01	0.014	118	23.8	1.056	0.079	118	21	0.0468403	22.4	0	FALSE	FALSE	TRUE	FALSE	0.99	-0.014	118
P48723	Heat shock 70 kDa protein 13 OS=Homo sapiens GN=HSPA13 PE=1 SV=1 - [HSP13_HUMAN]	HSPA13	635.22	16.35	1	7	7	24	471	51.9	5.76	1.154	0.207	24	18.8	1.284	0.361	24	20.5	0.285698	19.65	1.197	0.259	24	16.4	0.943	-0.085	24	14.4	0.0976108	15.4	1.346	0.429	24	15.3	1.154	0.207	24	15.8	0.321928	15.55	3	FALSE	FALSE	TRUE	FALSE	1.026	0.037	24
P34932	Heat shock 70 kDa protein 4 OS=Homo sapiens GN=HSPA4 PE=1 SV=4 - [HSP74_HUMAN]	HSPA4	10370.5	78.57	1	64	71	387	840	94.3	5.19	0.948	-0.077	343	33.1	0.944	-0.083	343	23.2	-0.0800879	28.15	0.969	-0.045	343	17.2	0.986	-0.02	342	18.4	-0.0328314	17.8	0.904	-0.146	343	26.6	0.965	-0.051	342	24.1	-0.0977334	25.35	0	FALSE	FALSE	TRUE	FALSE	0.97	-0.044	343
Q9UL15	BAG family molecular chaperone regulator 5 OS=Homo sapiens GN=BAG5 PE=1 SV=1 - [BAG5_HUMAN]	BAG5	614.63	32.66	1	11	11	23	447	51.2	6.05	1.002	0.003	23	30.6	1.033	0.047	23	24.2	0.0250288	27.4	0.955	-0.066	23	18.6	0.95	-0.074	23	16.8	-0.070209	17.7	0.966	-0.05	23	10.8	0.999	-0.001	23	14.2	-0.0254707	12.5	0	FALSE	FALSE	TRUE	FALSE	0.945	-0.082	23
Q99543	DnaJ homolog subfamily C member 2 OS=Homo sapiens GN=DNAJC2 PE=1 SV=4 - [DNJC2_HUMAN]	DNAJC2	394.51	28.02	1	16	16	22	621	72	8.7	0.912	-0.133	22	22.2	0.933	-0.1	22	20.2	-0.116379	21.2	0.937	-0.094	22	13.4	0.899	-0.154	22	13.1	-0.123434	13.25	0.824	-0.279	22	20.8	0.812	-0.3	22	17.8	-0.289827	19.3	0	FALSE	FALSE	TRUE	FALSE	1.048	0.068	22
Q53FT3	Protein Hikeshi OS=Homo sapiens GN=HIKESHI PE=1 SV=2 - [HIKES_HUMAN]	HIKESHI	34.47	5.08	1	1	1	2	197	21.6	5.45	1.026	0.037	2	10.9	1.067	0.094	2	4.8	0.0655723	7.85	1.001	0.001	2	1.8	1.088	0.122	2	0.5	0.0628125	1.15	1.018	0.026	2	9.1	1.154	0.207	2	4.4	0.119024	6.75		FALSE	FALSE	FALSE		0.95	-0.074	2
O75190	DnaJ homolog subfamily B member 6 OS=Homo sapiens GN=DNAJB6 PE=1 SV=2 - [DNJB6_HUMAN]	DNAJB6	217.08	13.8	3	4	4	8	326	36.1	9.16	1.264	0.338	8	20	1.133	0.18	8	18	0.26123	19	0.913	-0.131	8	20.8	0.963	-0.054	8	8.8	-0.0923402	14.8	1.037	0.052	8	13.6	1.094	0.13	8	8.1	0.0915306	10.85	0	FALSE	FALSE	TRUE	FALSE	0.982	-0.026	8
O95817	BAG family molecular chaperone regulator 3 OS=Homo sapiens GN=BAG3 PE=1 SV=3 - [BAG3_HUMAN]	BAG3	1002.45	46.61	1	21	21	42	575	61.6	6.95	1.165	0.22	42	36.4	1.136	0.184	42	36	0.202261	36.2	0.761	-0.394	42	25.9	0.764	-0.388	42	24.9	-0.391191	25.4	0.939	-0.091	42	31.1	0.959	-0.06	42	26	-0.07552	28.55	6	FALSE	FALSE	TRUE	FALSE	1.005	0.007	42
Q00613	Heat shock factor protein 1 OS=Homo sapiens GN=HSF1 PE=1 SV=1 - [HSF1_HUMAN]	HSF1	120.58	6.99	1	2	2	2	529	57.2	5.19	1.103	0.141	2	62.8	1.227	0.295	2	52.3	0.22033	57.55	0.786	-0.347	2	8.8	0.826	-0.276	2	25.8	-0.311148	17.3	0.859	-0.219	2	51.9	1.008	0.011	2	24.1	-0.0992781	38		FALSE	FALSE	FALSE		0.911	-0.134	2
P34931	Heat shock 70 kDa protein 1-like OS=Homo sapiens GN=HSPA1L PE=1 SV=2 - [HS71L_HUMAN]	HSPA1L	4385.37	35.88	1	1	24	161	641	70.3	6.02	0.754	-0.407	2	4.8	0.737	-0.44	2	21	-0.42372	12.9	1.034	0.048	2	3.8	1.106	0.145	2	1.1	0.0976108	2.45	0.773	-0.371	2	8.6	0.811	-0.302	2	22.1	-0.336428	15.35		FALSE	FALSE	FALSE		0.966	-0.05	2
Q9Y241	HIG1 domain family member 1A, mitochondrial OS=Homo sapiens GN=HIGD1A PE=1 SV=1 - [HIG1A_HUMAN]	HIGD1A	195.88	19.35	1	1	1	4	93	10.1	9.79	1.153	0.205	4	6.8	1.176	0.234	4	2.8	0.219711	4.8	0.793	-0.335	4	8.5	0.762	-0.392	4	9	-0.363085	8.75	0.909	-0.138	4	15.8	0.928	-0.108	4	3.9	-0.122648	9.85	6	FALSE	FALSE	TRUE	FALSE	1.035	0.05	4
Q9NWT6	Hypoxia-inducible factor 1-alpha inhibitor OS=Homo sapiens GN=HIF1AN PE=1 SV=2 - [HIF1N_HUMAN]	HIF1AN	319.65	21.2	1	5	5	12	349	40.3	5.57	0.955	-0.066	11	10.2	0.91	-0.136	11	14.2	-0.100824	12.2	0.983	-0.025	11	8	1.03	0.043	11	9.3	0.00934717	8.65	0.937	-0.094	11	3.4	1.02	0.029	11	11.7	-0.0313562	7.55	0	FALSE	FALSE	TRUE	FALSE	0.955	-0.066	11
P51812	Ribosomal protein S6 kinase alpha-3 OS=Homo sapiens GN=RPS6KA3 PE=1 SV=1 - [KS6A3_HUMAN]	RPS6KA3	771.41	34.73	4	17	25	48	740	83.7	6.89	1.078	0.108	27	24.9	1.13	0.176	27	26	0.14274	25.45	0.888	-0.171	27	14	0.859	-0.219	27	17	-0.19512	15.5	0.962	-0.056	27	14.1	0.965	-0.051	27	16.5	-0.0536434	15.3	0	FALSE	FALSE	TRUE	FALSE	0.963	-0.054	27
Q15349	Ribosomal protein S6 kinase alpha-2 OS=Homo sapiens GN=RPS6KA2 PE=1 SV=2 - [KS6A2_HUMAN]	RPS6KA2	292.89	13.92	3	3	9	22	733	83.2	8.68	1.044	0.062	3	5.5	0.892	-0.165	3	1.2	-0.046921	3.35	1.377	0.462	3	15	1.423	0.509	3	5.5	0.485427	10.25	1.288	0.365	3	19.2	1.377	0.462	3	13.2	0.414136	16.2	1	FALSE	FALSE	TRUE	FALSE	1.05	0.07	3
Q15418	Ribosomal protein S6 kinase alpha-1 OS=Homo sapiens GN=RPS6KA1 PE=1 SV=2 - [KS6A1_HUMAN]	RPS6KA1	512.66	29.66	3	12	19	29	735	82.7	7.83	1.068	0.095	15	9.9	1.04	0.057	15	17.9	0.0758749	13.9	1.09	0.124	15	8.6	1.14	0.189	15	14.6	0.157044	11.6	1.137	0.185	15	8.1	1.154	0.207	15	19.6	0.195977	13.85	0	FALSE	FALSE	TRUE	FALSE	0.97	-0.044	15
P49137	MAP kinase-activated protein kinase 2 OS=Homo sapiens GN=MAPKAPK2 PE=1 SV=1 - [MAPK2_HUMAN]	MAPKAPK2	123.94	31.5	2	9	11	14	400	45.5	8.68	0.956	-0.065	11	10.5	1.133	0.18	11	16.8	0.0628125	13.65	0.891	-0.167	11	10.7	0.939	-0.091	11	16.2	-0.128156	13.45	0.935	-0.097	11	14.1	1.019	0.027	11	12	-0.0335695	13.05	0	FALSE	FALSE	TRUE	FALSE	0.946	-0.08	11
Q16644	MAP kinase-activated protein kinase 3 OS=Homo sapiens GN=MAPKAPK3 PE=1 SV=1 - [MAPK3_HUMAN]	MAPKAPK3	103.23	15.18	2	3	5	6	382	43	7.28	1.004	0.006	3	5.6	0.965	-0.051	3	2.7	-0.0225369	4.15	0.881	-0.183	3	3.5	0.901	-0.15	3	9.5	-0.166503	6.5	0.889	-0.17	3	2.1	0.827	-0.274	3	6.2	-0.22095	4.15	0	FALSE	FALSE	TRUE	FALSE	0.937	-0.094	3
Q13164	Mitogen-activated protein kinase 7 OS=Homo sapiens GN=MAPK7 PE=1 SV=2 - [MK07_HUMAN]	MAPK7	258.04	13.11	3	10	11	13	816	88.3	5.88	0.957	-0.063	12	21.5	0.993	-0.01	12	21.7	-0.0365259	21.6	1.225	0.293	12	14.2	1.237	0.307	12	20.9	0.299831	17.55	1.216	0.282	12	14.2	1.147	0.198	12	7.8	0.24062	11	0	FALSE	FALSE	TRUE	FALSE	1.03	0.043	12
P51965	Ubiquitin-conjugating enzyme E2 E1 OS=Homo sapiens GN=UBE2E1 PE=1 SV=1 - [UB2E1_HUMAN]	UBE2E1	192.35	31.09	1	2	4	7	193	21.4	8.53	1.276	0.352	5	4	1.225	0.293	5	50.6	0.322505	27.3	0.815	-0.295	5	30.5	0.691	-0.533	5	14.4	-0.409278	22.45	1.007	0.01	5	7.1	0.932	-0.102	5	26.5	-0.0446872	16.8	6	FALSE	FALSE	TRUE	FALSE	0.985	-0.022	5
O00762	Ubiquitin-conjugating enzyme E2 C OS=Homo sapiens GN=UBE2C PE=1 SV=1 - [UBE2C_HUMAN]	UBE2C	991.77	75.42	1	15	15	38	179	19.6	7.37	0.787	-0.346	34	11.4	0.764	-0.388	34	26.3	-0.366801	18.85	0.695	-0.525	34	41.5	0.741	-0.432	34	63.3	-0.477944	52.4	0.511	-0.969	34	63.7	0.485	-1.044	34	62.6	-1.00578	63.15	5	FALSE	FALSE	TRUE	FALSE	0.981	-0.028	34
Q13042	Cell division cycle protein 16 homolog OS=Homo sapiens GN=CDC16 PE=1 SV=2 - [CDC16_HUMAN]	CDC16	408.13	24.84	1	14	14	22	620	71.6	5.85	1.066	0.092	22	45	1.047	0.066	22	38.5	0.0792928	41.75	0.931	-0.103	22	30.1	0.951	-0.072	22	15.8	-0.0877334	22.95	0.885	-0.176	22	17.7	0.971	-0.042	22	25.7	-0.107803	21.7	0	FALSE	FALSE	TRUE	FALSE	0.968	-0.047	22
Q9UJX2	Cell division cycle protein 23 homolog OS=Homo sapiens GN=CDC23 PE=1 SV=3 - [CDC23_HUMAN]	CDC23	349.8	23.12	1	12	12	14	597	68.8	7.02	1.091	0.126	14	9.4	1.086	0.119	14	11.4	0.122341	10.4	0.848	-0.238	14	10.3	0.926	-0.111	14	16.8	-0.172994	13.55	0.954	-0.068	14	9.6	1.021	0.03	14	9.1	-0.0181473	9.35	0	FALSE	FALSE	TRUE	FALSE	0.931	-0.103	14
Q9UJX6	Anaphase-promoting complex subunit 2 OS=Homo sapiens GN=ANAPC2 PE=1 SV=1 - [ANC2_HUMAN]	ANAPC2	70.2	5.23	1	4	4	4	822	93.8	5.22	0.992	-0.012	4	14.5	0.873	-0.196	4	15.9	-0.100824	15.2	0.935	-0.097	4	11.7	1.028	0.04	4	3.9	-0.0269398	7.8	0.854	-0.228	4	12.8	0.871	-0.199	4	12.1	-0.213404	12.45	0	FALSE	FALSE	TRUE	FALSE	0.974	-0.038	4
Q8NHZ8	Anaphase-promoting complex subunit CDC26 OS=Homo sapiens GN=CDC26 PE=1 SV=1 - [CDC26_HUMAN]	CDC26	175.27	38.82	1	2	2	6	85	9.8	6.81	1.083	0.115	6	13.3	1.007	0.01	6	9.6	0.0635029	11.45	0.939	-0.091	6	7.8	0.98	-0.029	6	11.2	-0.0596453	9.5	0.959	-0.06	6	6.8	0.96	-0.059	6	18	-0.0596453	12.4	0	FALSE	FALSE	TRUE	FALSE	0.999	-0.001	6
Q9H1A4	Anaphase-promoting complex subunit 1 OS=Homo sapiens GN=ANAPC1 PE=1 SV=1 - [APC1_HUMAN]	ANAPC1	470.04	9.83	1	15	15	21	1944	216.4	6.3	0.904	-0.146	21	13.2	0.948	-0.077	21	21.3	-0.110916	17.25	0.986	-0.02	21	14.2	1.052	0.073	21	13	0.0271541	13.6	0.822	-0.283	21	14.9	0.949	-0.076	21	15	-0.175436	14.95	0	FALSE	FALSE	TRUE	FALSE	0.905	-0.144	21
P30260	Cell division cycle protein 27 homolog OS=Homo sapiens GN=CDC27 PE=1 SV=2 - [CDC27_HUMAN]	CDC27	226.24	12.26	1	10	10	11	824	91.8	7.02	0.997	-0.004	11	29.7	1.018	0.026	11	32	0.0107798	30.85	0.923	-0.116	11	9.1	0.9	-0.152	11	13.9	-0.133685	11.5	0.916	-0.127	11	33.6	0.89	-0.168	11	35.6	-0.147202	34.6	0	FALSE	FALSE	TRUE	FALSE	0.977	-0.034	11
Q9UJX3	Anaphase-promoting complex subunit 7 OS=Homo sapiens GN=ANAPC7 PE=1 SV=4 - [APC7_HUMAN]	ANAPC7	477.9	28.71	1	12	12	19	599	66.8	5.64	1.033	0.047	19	13	0.962	-0.056	19	22.5	-0.00361125	17.75	0.93	-0.105	19	18.4	0.91	-0.136	19	27.8	-0.120294	23.1	0.94	-0.089	19	18.4	0.846	-0.241	19	15.2	-0.163268	16.8	0	FALSE	FALSE	TRUE	FALSE	0.985	-0.022	19
Q9UJX4	Anaphase-promoting complex subunit 5 OS=Homo sapiens GN=ANAPC5 PE=1 SV=2 - [APC5_HUMAN]	ANAPC5	113.56	8.87	1	5	6	7	755	85	6.87	0.999	-0.001	5	7.5	0.981	-0.028	5	16.2	-0.0144996	11.85	1.015	0.021	5	11.7	1.018	0.026	5	13.9	0.0236102	12.8	0.916	-0.127	5	8.5	0.993	-0.01	5	14.1	-0.0671829	11.3	0	FALSE	FALSE	TRUE	FALSE	0.983	-0.025	5
Q9UJX5	Anaphase-promoting complex subunit 4 OS=Homo sapiens GN=ANAPC4 PE=1 SV=2 - [APC4_HUMAN]	ANAPC4	269.99	10.02	1	6	6	9	808	92.1	5.53	1.095	0.131	8	18.5	1.181	0.24	8	24.1	0.186501	21.3	0.889	-0.17	8	15.6	0.879	-0.186	8	15.1	-0.177882	15.35	0.914	-0.13	8	11.3	0.921	-0.119	8	8.4	-0.12422	9.85	0	FALSE	FALSE	TRUE	FALSE	0.977	-0.034	8
Q9Y5B8	Nucleoside diphosphate kinase 7 OS=Homo sapiens GN=NME7 PE=1 SV=1 - [NDK7_HUMAN]	NME7	184.31	29.26	1	8	8	11	376	42.5	6.47	1.063	0.088	10	15	1.125	0.17	10	7.8	0.129613	11.4	0.929	-0.106	10	7.9	1.097	0.134	10	18.2	0.0186342	13.05	1.016	0.023	10	27.7	1.14	0.189	10	14.7	0.108357	21.2	0	FALSE	FALSE	TRUE	FALSE	0.962	-0.056	10
Q08AG7	Mitotic-spindle organizing protein 1 OS=Homo sapiens GN=MZT1 PE=1 SV=2 - [MZT1_HUMAN]	MZT1	135.23	19.51	1	1	1	4	82	8.5	4.78	0.878	-0.188	4	10	0.851	-0.233	4	10.2	-0.210062	10.1	1.172	0.229	4	6.5	1.131	0.178	4	6.1	0.203514	6.3	0.993	-0.01	4	13.1	0.968	-0.047	4	9.7	-0.0284105	11.4	0	FALSE	FALSE	TRUE	FALSE	1.037	0.052	4
Q6NZ67	Mitotic-spindle organizing protein 2B OS=Homo sapiens GN=MZT2B PE=1 SV=1 - [MZT2B_HUMAN]	MZT2B	472.65	65.82	2	6	6	9	158	16.2	10.15	0.88	-0.184	8	21.1	0.925	-0.112	8	7.3	-0.148001	14.2	1.052	0.073	8	10.6	1.009	0.013	8	15.4	0.0433445	13	0.94	-0.089	8	19.9	1.022	0.031	8	12.4	-0.027675	16.15	0	FALSE	FALSE	TRUE	FALSE	0.987	-0.019	8
Q96CW5	Gamma-tubulin complex component 3 OS=Homo sapiens GN=TUBGCP3 PE=1 SV=2 - [GCP3_HUMAN]	TUBGCP3	240.77	13.23	1	9	9	14	907	103.5	8.12	0.957	-0.063	14	8.9	0.97	-0.044	14	18	-0.0536434	13.45	1.145	0.195	14	8.6	1.153	0.205	14	16.9	0.200379	12.75	1.064	0.089	14	17.2	1.07	0.098	14	12	0.0935602	14.6	0	FALSE	FALSE	TRUE	FALSE	0.97	-0.044	14
Q96RT8	Gamma-tubulin complex component 5 OS=Homo sapiens GN=TUBGCP5 PE=1 SV=1 - [GCP5_HUMAN]	TUBGCP5	121.04	4.3	1	3	3	4	1024	118.2	5.9	0.93	-0.105	4	8	0.966	-0.05	4	8	-0.077041	8	0.971	-0.042	4	4.5	0.874	-0.194	4	6.6	-0.116379	5.55	0.923	-0.116	4	14	0.931	-0.103	4	24	-0.109359	19	0	FALSE	FALSE	TRUE	FALSE	0.946	-0.08	4
Q96RT7	Gamma-tubulin complex component 6 OS=Homo sapiens GN=TUBGCP6 PE=1 SV=3 - [GCP6_HUMAN]	TUBGCP6	45	1.1	1	1	2	2	1819	200.4	6.32	0.936	-0.095	1	NA	1.077	0.107	1	NA	0.00934717	NA	1.145	0.195	1	NA	1.257	0.33	1	NA	0.264236	NA	1.062	0.087	1	NA	1.347	0.43	1	NA	0.268434	NA		FALSE	FALSE	FALSE		0.924	-0.114	1
Q9UGJ1	Gamma-tubulin complex component 4 OS=Homo sapiens GN=TUBGCP4 PE=1 SV=1 - [GCP4_HUMAN]	TUBGCP4	54.42	2.85	1	2	2	2	667	76	6.65	1.088	0.122	2	38.6	0.987	-0.019	2	71.6	0.0531113	55.1	0.93	-0.105	2	40.3	0.921	-0.119	2	54.5	-0.111695	47.4	1.003	0.004	2	1.5	0.904	-0.146	2	13.3	-0.0686952	7.4		FALSE	FALSE	FALSE		1.061	0.085	2
Q9BSJ2	Gamma-tubulin complex component 2 OS=Homo sapiens GN=TUBGCP2 PE=1 SV=2 - [GCP2_HUMAN]	TUBGCP2	436.24	18.74	1	15	15	24	902	102.5	6.84	0.951	-0.072	24	17	0.943	-0.085	24	16.5	-0.0785637	16.75	1.078	0.108	24	11.2	1.066	0.092	24	22.6	0.100305	16.9	1.07	0.098	24	22.1	1.012	0.017	24	16.8	0.0579701	19.45	0	FALSE	FALSE	TRUE	FALSE	1.016	0.023	24
O76074	cGMP-specific 3',5'-cyclic phosphodiesterase OS=Homo sapiens GN=PDE5A PE=1 SV=2 - [PDE5A_HUMAN]	PDE5A	233.11	15.77	1	11	11	15	875	99.9	6.09	1.026	0.037	15	11.1	1.02	0.029	15	25.4	0.0328061	18.25	1.921	0.942	15	25.1	2.175	1.121	15	11.4	1.03422	18.25	1.859	0.895	15	16.2	1.986	0.99	15	17.2	0.942984	16.7	2	FALSE	FALSE	TRUE	FALSE	0.975	-0.037	15
Q9H1H9	Kinesin-like protein KIF13A OS=Homo sapiens GN=KIF13A PE=1 SV=2 - [KI13A_HUMAN]	KIF13A	169.74	5.04	1	6	7	9	1805	202.2	5.6	0.914	-0.13	7	16.7	0.887	-0.173	7	15.7	-0.151202	16.2	1.044	0.062	7	20.2	1.087	0.12	7	13.8	0.0915306	17	0.91	-0.136	7	10.6	0.92	-0.12	7	7	-0.128156	8.8	0	FALSE	FALSE	TRUE	FALSE	1.051	0.072	7
O95302	Peptidyl-prolyl cis-trans isomerase FKBP9 OS=Homo sapiens GN=FKBP9 PE=1 SV=2 - [FKBP9_HUMAN]	FKBP9	592.73	17.89	2	12	12	30	570	63	5.08	1.022	0.031	30	26.1	1.023	0.033	30	18.5	0.0321008	22.3	1.06	0.084	30	9.8	0.958	-0.062	30	17.4	0.0129262	13.6	1.047	0.066	30	20.6	0.99	-0.014	30	17.7	0.026446	19.15	0	FALSE	FALSE	TRUE	FALSE	1.048	0.068	30
Q9Y6D5	Brefeldin A-inhibited guanine nucleotide-exchange protein 2 OS=Homo sapiens GN=ARFGEF2 PE=1 SV=3 - [BIG2_HUMAN]	ARFGEF2	711.65	9.8	1	6	16	33	1785	201.9	6.33	1.087	0.12	10	21.2	1.112	0.153	10	29	0.136848	25.1	1.075	0.104	10	8.1	1.017	0.024	10	20	0.0648829	14.05	1.148	0.199	10	16.4	1.171	0.228	10	24.5	0.213503	20.45	0	FALSE	FALSE	TRUE	FALSE	0.969	-0.045	10
Q9Y2T2	AP-3 complex subunit mu-1 OS=Homo sapiens GN=AP3M1 PE=1 SV=1 - [AP3M1_HUMAN]	AP3M1	608.48	30.86	1	8	9	23	418	46.9	6.93	1.149	0.2	18	22.3	1.174	0.231	18	25.3	0.215989	23.8	0.983	-0.025	18	13.5	1.013	0.019	18	13.3	-0.00288828	13.4	1.089	0.123	18	11.2	1.165	0.22	18	23	0.172488	17.1	0	FALSE	FALSE	TRUE	FALSE	0.973	-0.039	18
Q13371	Phosducin-like protein OS=Homo sapiens GN=PDCL PE=1 SV=3 - [PHLP_HUMAN]	PDCL	302.3	27.57	1	7	7	17	301	34.3	4.73	1.076	0.106	17	10.1	1.011	0.016	17	7.3	0.0614306	8.7	1	0	17	10.2	1.069	0.096	17	7.8	0.0489336	9	1.061	0.085	17	8.5	1.051	0.072	17	9.2	0.0786098	8.85	0	FALSE	FALSE	TRUE	FALSE	1.016	0.023	17
P61962	DDB1- and CUL4-associated factor 7 OS=Homo sapiens GN=DCAF7 PE=1 SV=1 - [DCAF7_HUMAN]	DCAF7	709.01	35.96	1	12	12	24	342	38.9	5.52	1.072	0.1	24	24.3	0.963	-0.054	24	23.5	0.0250288	23.9	1.028	0.04	24	23.6	1.2	0.263	24	15.5	0.155749	19.55	1.11	0.151	24	21	1.219	0.286	24	18.2	0.219711	19.6	0	FALSE	FALSE	TRUE	FALSE	1.002	0.003	24
Q86WA8	Lon protease homolog 2, peroxisomal OS=Homo sapiens GN=LONP2 PE=1 SV=1 - [LONP2_HUMAN]	LONP2	267.75	10.68	2	8	9	12	852	94.6	7.3	1.229	0.297	11	4.5	1.235	0.305	11	11.7	0.301002	8.1	0.919	-0.122	11	17.9	0.9	-0.152	11	8.7	-0.136854	13.3	1.12	0.163	11	16.7	1.085	0.118	11	13.8	0.140779	15.25	3	FALSE	FALSE	TRUE	FALSE	1.011	0.016	11
P51784	Ubiquitin carboxyl-terminal hydrolase 11 OS=Homo sapiens GN=USP11 PE=1 SV=3 - [UBP11_HUMAN]	USP11	1317.62	28.45	1	25	27	65	963	109.7	5.45	1.25	0.322	62	35.7	1.317	0.397	62	35.8	0.360083	35.75	0.956	-0.065	62	18.3	0.98	-0.029	62	25.7	-0.046921	22	1.227	0.295	62	23.3	1.27	0.345	62	28	0.320196	25.65	3	FALSE	FALSE	TRUE	FALSE	1.023	0.033	62
Q15392	Delta(24)-sterol reductase OS=Homo sapiens GN=DHCR24 PE=1 SV=2 - [DHC24_HUMAN]	DHCR24	370.62	19.38	1	12	12	19	516	60.1	8.16	0.984	-0.023	19	24.5	1.151	0.203	19	15.9	0.0942361	20.2	0.999	-0.001	19	18.2	0.983	-0.025	19	28.3	-0.013043	23.25	1.043	0.061	19	12.4	1.055	0.077	19	19.6	0.0690147	16	0	FALSE	FALSE	TRUE	FALSE	0.998	-0.003	19
Q15738	Sterol-4-alpha-carboxylate 3-dehydrogenase, decarboxylating OS=Homo sapiens GN=NSDHL PE=1 SV=2 - [NSDHL_HUMAN]	NSDHL	933.49	50.94	1	18	18	39	373	41.9	8.06	0.923	-0.116	36	30.2	1.05	0.07	36	32.5	-0.019609	31.35	0.936	-0.095	36	13.6	0.744	-0.427	36	27.4	-0.251539	20.5	0.82	-0.286	36	15.4	0.9	-0.152	36	32.5	-0.217591	23.95	0	FALSE	FALSE	TRUE	FALSE	0.937	-0.094	36
P56937	3-keto-steroid reductase OS=Homo sapiens GN=HSD17B7 PE=1 SV=1 - [DHB7_HUMAN]	HSD17B7	89.74	8.21	4	2	3	5	341	38.2	8.1	1.274	0.349	2	12.9	1.49	0.575	2	4.8	0.466758	8.85	0.866	-0.208	2	7.7	0.762	-0.392	2	14.2	-0.296899	10.95	1.094	0.13	2	20.7	1.13	0.176	2	9.4	0.153157	15.05		FALSE	FALSE	FALSE		0.898	-0.155	2
Q14739	Lamin-B receptor OS=Homo sapiens GN=LBR PE=1 SV=2 - [LBR_HUMAN]	LBR	269.34	13.82	1	9	9	11	615	70.7	9.36	1.1	0.138	11	25.4	1.879	0.91	11	41.7	0.574828	33.55	1.122	0.166	11	16.1	0.698	-0.519	11	31.4	-0.136062	23.75	1.196	0.258	11	11.7	0.993	-0.01	11	12.1	0.130272	11.9		FALSE	FALSE	TRUE	TRUE	1.056	0.079	11
Q9BWD1	Acetyl-CoA acetyltransferase, cytosolic OS=Homo sapiens GN=ACAT2 PE=1 SV=2 - [THIC_HUMAN]	ACAT2	6258.81	75.57	1	25	25	158	397	41.3	6.92	0.802	-0.318	144	21.9	0.824	-0.279	144	25.9	-0.298673	23.9	0.886	-0.175	144	19.3	0.921	-0.119	144	19	-0.146403	19.15	0.687	-0.542	144	21.4	0.808	-0.308	144	22.5	-0.419855	21.95	4	FALSE	FALSE	TRUE	FALSE	0.936	-0.095	144
Q8IY26	Phospholipid phosphatase 6 OS=Homo sapiens GN=PLPP6 PE=1 SV=3 - [PLPP6_HUMAN]	PLPP6	86.57	3.39	1	1	1	3	295	32.2	9.99	0.901	-0.15	3	3.8	0.984	-0.023	3	9.7	-0.0854355	6.75	1.352	0.435	3	17.3	1.191	0.252	3	3.8	0.346531	10.55	1.278	0.354	3	5	1.213	0.279	3	0.8	0.316725	2.9	1	FALSE	FALSE	TRUE	FALSE	1.037	0.052	3
P49419	Alpha-aminoadipic semialdehyde dehydrogenase OS=Homo sapiens GN=ALDH7A1 PE=1 SV=5 - [AL7A1_HUMAN]	ALDH7A1	4023.38	58.07	1	35	35	145	539	58.5	7.99	0.973	-0.039	145	20.2	0.969	-0.045	145	20.5	-0.0424568	20.35	1.122	0.166	145	13.4	1.169	0.225	145	13.3	0.195977	13.35	1.071	0.099	145	17.4	1.09	0.124	145	17.5	0.111699	17.45	0	FALSE	FALSE	TRUE	FALSE	0.981	-0.028	145
Q9UL12	Sarcosine dehydrogenase, mitochondrial OS=Homo sapiens GN=SARDH PE=1 SV=1 - [SARDH_HUMAN]	SARDH	23.45	1.53	1	1	2	2	918	101	7.25	1.067	0.094	1	NA	0.988	-0.017	1	NA	0.0391384	NA	1.04	0.057	1	NA	1.013	0.019	1	NA	0.0377336	NA	1.1	0.138	1	NA	0.996	-0.006	1	NA	0.0676387	NA		FALSE	FALSE	FALSE		1.03	0.043	1
Q96L91	E1A-binding protein p400 OS=Homo sapiens GN=EP400 PE=1 SV=4 - [EP400_HUMAN]	EP400	112.99	2.06	1	5	5	6	3159	343.3	9.19	0.978	-0.032	6	21.5	1.044	0.062	6	26.1	0.015783	23.8	0.999	-0.001	6	8.3	0.932	-0.102	6	10.3	-0.0506518	9.3	1.228	0.296	6	23.2	0.952	-0.071	6	23.3	0.124328	23.25	0	FALSE	FALSE	TRUE	FALSE	1.082	0.114	6
Q9ULM3	YEATS domain-containing protein 2 OS=Homo sapiens GN=YEATS2 PE=1 SV=2 - [YETS2_HUMAN]	YEATS2	68.65	3.23	1	3	4	6	1422	150.7	8.98	0.918	-0.123	3	2.3	0.83	-0.269	3	0.1	-0.194295	1.2	0.965	-0.051	3	13.8	1.137	0.185	3	5.3	0.0717627	9.55	0.889	-0.17	3	1.8	0.939	-0.091	3	0.1	-0.129734	0.95	0	FALSE	FALSE	TRUE	FALSE	0.964	-0.053	3
Q6IA86	Elongator complex protein 2 OS=Homo sapiens GN=ELP2 PE=1 SV=2 - [ELP2_HUMAN]	ELP2	273.89	19.98	1	12	12	14	826	92.4	5.96	1.04	0.057	14	21.4	0.983	-0.025	14	12.5	0.0164963	16.95	0.954	-0.068	14	13.3	1.017	0.024	14	19	-0.0210722	16.15	0.99	-0.014	14	12.2	1.065	0.091	14	12.2	0.0391384	12.2	0	FALSE	FALSE	TRUE	FALSE	1.014	0.02	14
Q92613	Protein Jade-3 OS=Homo sapiens GN=JADE3 PE=1 SV=1 - [JADE3_HUMAN]	JADE3	75.83	4.01	1	3	3	3	823	93.7	7.18	0.904	-0.146	3	8	0.827	-0.274	3	3.4	-0.208394	5.7	0.957	-0.063	3	3.1	0.95	-0.074	3	8.6	-0.0686952	5.85	0.876	-0.191	3	11.1	0.838	-0.255	3	10.3	-0.222633	10.7	0	FALSE	FALSE	TRUE	FALSE	0.987	-0.019	3
Q9H7Z6	Histone acetyltransferase KAT8 OS=Homo sapiens GN=KAT8 PE=1 SV=2 - [KAT8_HUMAN]	KAT8	79.77	6.33	1	4	4	4	458	52.4	8.27	1.007	0.01	4	10.4	0.831	-0.267	4	11.8	-0.121863	11.1	1.105	0.144	4	35.3	1.173	0.23	4	49.9	0.187768	42.6	0.965	-0.051	4	5.1	0.989	-0.016	4	25.8	-0.0335695	15.45	0	FALSE	FALSE	TRUE	FALSE	1.033	0.047	4
O95251	Histone acetyltransferase KAT7 OS=Homo sapiens GN=KAT7 PE=1 SV=1 - [KAT7_HUMAN]	KAT7	129.21	10.8	1	7	7	8	611	70.6	8.85	1.155	0.208	8	7	1.007	0.01	8	22	0.112367	14.5	1.122	0.166	8	22	1.057	0.08	8	17.3	0.123666	19.65	1.094	0.13	8	25.2	0.96	-0.059	8	10.2	0.0384362	17.7	0	FALSE	FALSE	TRUE	FALSE	0.985	-0.022	8
Q9H9L4	KAT8 regulatory NSL complex subunit 2 OS=Homo sapiens GN=KANSL2 PE=1 SV=3 - [KANL2_HUMAN]	KANSL2	54.62	7.52	1	2	2	2	492	55	6.62	0.785	-0.349	2	1.6	0.86	-0.218	2	1.5	-0.281912	1.55	0.987	-0.019	2	15.7	0.856	-0.224	2	1.5	-0.117944	8.6	0.767	-0.383	2	14.1	0.732	-0.45	2	3	-0.416	8.55		FALSE	FALSE	FALSE		0.985	-0.022	2
Q9UBU8	Mortality factor 4-like protein 1 OS=Homo sapiens GN=MORF4L1 PE=1 SV=2 - [MO4L1_HUMAN]	MORF4L1	104.55	17.4	1	4	5	7	362	41.4	9.28	0.793	-0.335	5	3.3	0.89	-0.168	5	16	-0.248965	9.65	1.048	0.068	5	13.7	1.004	0.006	5	7.4	0.0370307	10.55	0.838	-0.255	5	14.7	0.799	-0.324	5	30.5	-0.288946	22.6	0	FALSE	FALSE	TRUE	FALSE	1.003	0.004	5
Q6IE81	Protein Jade-1 OS=Homo sapiens GN=JADE1 PE=1 SV=1 - [JADE1_HUMAN]	JADE1	99.14	3.56	1	2	2	4	842	95.5	7.91	0.87	-0.201	4	2.6	0.885	-0.176	4	2.8	-0.188529	2.7	0.769	-0.379	4	24.5	0.752	-0.411	4	19.7	-0.39498	22.1	0.711	-0.492	4	27.6	0.638	-0.648	4	28.4	-0.56811	28	5	FALSE	FALSE	TRUE	FALSE	1.028	0.04	4
Q9UNL4	Inhibitor of growth protein 4 OS=Homo sapiens GN=ING4 PE=1 SV=1 - [ING4_HUMAN]	ING4	113.34	16.87	1	3	4	4	249	28.5	7.62	0.828	-0.272	3	1.1	0.955	-0.066	3	3.5	-0.165693	2.3	1.134	0.181	3	8.3	1.123	0.167	3	2.3	0.174406	5.3	1.121	0.165	3	17.7	1.093	0.128	3	5.8	0.146655	11.75	0	FALSE	FALSE	TRUE	FALSE	0.936	-0.095	3
Q9P2N6	KAT8 regulatory NSL complex subunit 3 OS=Homo sapiens GN=KANSL3 PE=1 SV=2 - [KANL3_HUMAN]	KANSL3	93.16	2.32	1	2	2	3	904	95.9	9.39	0.963	-0.054	3	12.5	0.995	-0.007	3	0.5	-0.0306192	6.5	1.136	0.184	3	3.1	0.959	-0.06	3	4.2	0.0669502	3.65	1.084	0.116	3	3.8	0.89	-0.168	3	2.7	-0.018878	3.25	0	FALSE	FALSE	TRUE	FALSE	1.059	0.083	3
Q15014	Mortality factor 4-like protein 2 OS=Homo sapiens GN=MORF4L2 PE=1 SV=1 - [MO4L2_HUMAN]	MORF4L2	196.62	28.13	1	8	9	11	288	32.3	9.72	0.995	-0.007	10	33.3	1.17	0.227	10	15.5	0.114367	24.4	0.896	-0.158	10	13.6	0.91	-0.136	10	20.2	-0.147202	16.9	0.901	-0.15	10	18.1	0.962	-0.056	10	26.7	-0.102372	22.4	0	FALSE	FALSE	TRUE	FALSE	1.041	0.058	10
Q9Y6J9	TAF6-like RNA polymerase II p300/CBP-associated factor-associated factor 65 kDa subunit 6L OS=Homo sapiens GN=TAF6L PE=1 SV=1 - [TAF6L_HUMAN]	TAF6L	75.77	7.07	1	4	4	5	622	67.8	8.97	1.057	0.08	5	60.3	0.855	-0.226	5	22.3	-0.0649175	41.3	1.308	0.387	5	12.9	1.028	0.04	5	21.9	0.22404	17.4	1.583	0.663	5	92.2	0.874	-0.194	5	10.6	0.296898	51.4	0	FALSE	FALSE	TRUE	FALSE	1.224	0.292	5
O14929	Histone acetyltransferase type B catalytic subunit OS=Homo sapiens GN=HAT1 PE=1 SV=1 - [HAT1_HUMAN]	HAT1	1483.74	47.97	1	17	17	57	419	49.5	5.69	0.986	-0.02	57	21.2	0.969	-0.045	57	18.9	-0.0328314	20.05	0.847	-0.24	57	16.6	0.867	-0.206	57	20.2	-0.222633	18.4	0.883	-0.18	57	19.1	0.883	-0.18	57	19.7	-0.179515	19.4	0	FALSE	FALSE	TRUE	FALSE	0.936	-0.095	57
O95163	Elongator complex protein 1 OS=Homo sapiens GN=IKBKAP PE=1 SV=3 - [ELP1_HUMAN]	IKBKAP	684.1	17.12	1	17	17	29	1332	150.2	5.94	0.955	-0.066	29	17	0.971	-0.042	29	14.2	-0.0543923	15.6	1.001	0.001	29	15	1.108	0.148	29	12.5	0.0765591	13.75	0.939	-0.091	29	9.4	1.036	0.051	29	15	-0.0181473	12.2	0	FALSE	FALSE	TRUE	FALSE	0.987	-0.019	29
Q96EB1	Elongator complex protein 4 OS=Homo sapiens GN=ELP4 PE=1 SV=2 - [ELP4_HUMAN]	ELP4	104.49	9.67	1	4	4	4	424	46.6	8.51	0.97	-0.044	4	12	0.933	-0.1	4	12.1	-0.0717244	12.05	1.075	0.104	4	1.8	1.158	0.212	4	2.3	0.158983	2.05	1.035	0.05	4	9.9	1.08	0.111	4	4.1	0.0806577	7	0	FALSE	FALSE	TRUE	FALSE	1.011	0.016	4
Q68DK7	Male-specific lethal 1 homolog OS=Homo sapiens GN=MSL1 PE=1 SV=3 - [MSL1_HUMAN]	MSL1	60.51	3.09	4	1	2	8	614	67.1	8.92	1.321	0.402	2	9.5	1.256	0.329	2	40.4	0.365693	24.95	0.893	-0.163	2	0.3	0.671	-0.576	2	37.9	-0.354759	19.1	1.169	0.225	2	9.8	0.839	-0.253	2	2.3	0.00575927	6.05		FALSE	FALSE	FALSE		1.013	0.019	2
Q9H8E8	Cysteine-rich protein 2-binding protein OS=Homo sapiens GN=KAT14 PE=1 SV=3 - [CSR2B_HUMAN]	KAT14	23.74	2.05	1	1	1	1	782	88.8	6.57	0.96	-0.059	1	NA	0.851	-0.233	1	NA	-0.143213	NA	1.222	0.289	1	NA	1.465	0.551	1	NA	0.425996	NA	1.162	0.217	1	NA	1.24	0.31	1	NA	0.264236	NA		FALSE	FALSE	FALSE		1.025	0.036	1
Q01658	Protein Dr1 OS=Homo sapiens GN=DR1 PE=1 SV=1 - [NC2B_HUMAN]	DR1	315.97	46.02	1	8	8	15	176	19.4	4.75	0.936	-0.095	14	9.3	0.974	-0.038	14	15.9	-0.0664274	12.6	1.006	0.009	14	15.9	1.106	0.145	14	11.1	0.0786098	13.5	1.002	0.003	14	13.6	1.043	0.061	14	16.9	0.0321008	15.25	0	FALSE	FALSE	TRUE	FALSE	0.949	-0.076	14
Q9NS73	MAP3K12-binding inhibitory protein 1 OS=Homo sapiens GN=MBIP PE=1 SV=2 - [MBIP1_HUMAN]	MBIP	79.93	8.72	1	2	2	2	344	39.3	7.24	0.881	-0.183	2	11.5	0.894	-0.162	2	17.4	-0.172181	14.45	0.805	-0.313	2	3.6	0.951	-0.072	2	4.8	-0.187707	4.2	0.704	-0.506	2	15.2	0.847	-0.24	2	22.3	-0.366801	18.75		FALSE	FALSE	FALSE		0.887	-0.173	2
Q8TE02	Elongator complex protein 5 OS=Homo sapiens GN=ELP5 PE=1 SV=2 - [ELP5_HUMAN]	ELP5	61.12	8.86	1	2	2	3	316	34.8	4.97	1.167	0.223	3	1.7	1.204	0.268	3	23.1	0.245496	12.4	1.033	0.047	3	21	1.146	0.197	3	3.4	0.123666	12.2	1.209	0.274	3	8	1.406	0.492	3	0.4	0.386811	4.2	3	FALSE	FALSE	TRUE	FALSE	0.9	-0.152	3
Q9H9T3	Elongator complex protein 3 OS=Homo sapiens GN=ELP3 PE=1 SV=2 - [ELP3_HUMAN]	ELP3	91.11	12.8	1	4	4	7	547	62.2	8.88	0.96	-0.059	7	6.2	0.908	-0.139	7	19.9	-0.0985055	13.05	1.224	0.292	7	8.9	1.214	0.28	7	7.3	0.285698	8.1	1.186	0.246	7	12.3	1.05	0.07	7	14	0.16092	13.15	0	FALSE	FALSE	TRUE	FALSE	1.052	0.073	7
Q9NV56	MRG/MORF4L-binding protein OS=Homo sapiens GN=MRGBP PE=1 SV=1 - [MRGBP_HUMAN]	MRGBP	123.72	15.2	1	3	3	4	204	22.4	5.83	1.083	0.115	4	25.6	1.241	0.312	4	3.3	0.21661	14.45	0.883	-0.18	4	7.7	0.992	-0.012	4	4.3	-0.0931094	6	0.999	-0.001	4	20.6	1.153	0.205	4	13.8	0.105678	17.2	0	FALSE	FALSE	TRUE	FALSE	0.844	-0.245	4
Q15906	Vacuolar protein sorting-associated protein 72 homolog OS=Homo sapiens GN=VPS72 PE=1 SV=1 - [VPS72_HUMAN]	VPS72	69.66	9.62	1	4	4	4	364	40.6	6.48	1.006	0.009	3	80.5	0.879	-0.186	3	126.7	-0.0854355	103.6	1.074	0.103	3	18.4	1.031	0.044	3	31.3	0.0738202	24.85	1.209	0.274	3	18	0.902	-0.149	3	50	0.0779266	34		FALSE	FALSE	TRUE	TRUE	1.099	0.136	3
Q9NPF5	DNA methyltransferase 1-associated protein 1 OS=Homo sapiens GN=DMAP1 PE=1 SV=1 - [DMAP1_HUMAN]	DMAP1	76.44	6.42	1	2	2	2	467	53	9.5	0.975	-0.037	2	22.9	0.914	-0.13	2	32.2	-0.0823773	27.55	1.058	0.081	2	12	1.158	0.212	2	35.9	0.147958	23.95	1.022	0.031	2	10.7	1.053	0.075	2	3.3	0.0531113	7		FALSE	FALSE	FALSE		1.094	0.13	2
Q96ES7	SAGA-associated factor 29 OS=Homo sapiens GN=SGF29 PE=1 SV=1 - [SGF29_HUMAN]	SGF29	62.54	9.9	1	2	2	2	293	33.2	8.1	0.89	-0.168	2	3.9	0.841	-0.25	2	0.7	-0.208394	2.3	0.999	-0.001	2	11.8	1.075	0.104	2	3.3	0.0524159	7.55	0.881	-0.183	2	15.8	0.9	-0.152	2	4	-0.167312	9.9		FALSE	FALSE	FALSE		0.972	-0.041	2
Q8NEM7	Transcription factor SPT20 homolog OS=Homo sapiens GN=SUPT20H PE=1 SV=2 - [SP20H_HUMAN]	SUPT20H	54.39	2.18	1	1	1	1	779	85.7	8.48	1.259	0.332	1	NA	1.39	0.475	1	NA	0.405448	NA	0.77	-0.377	1	NA	0.752	-0.411	1	NA	-0.394032	NA	0.961	-0.057	1	NA	1.041	0.058	1	NA	0.00144197	NA		FALSE	FALSE	FALSE		0.981	-0.028	1
Q9NPA8	Transcription and mRNA export factor ENY2 OS=Homo sapiens GN=ENY2 PE=1 SV=1 - [ENY2_HUMAN]	ENY2	208.16	36.63	1	4	4	10	101	11.5	9.33	0.933	-0.1	10	10.4	1.157	0.21	10	31.2	0.0635029	20.8	0.889	-0.17	10	12.2	0.874	-0.194	10	22.2	-0.181968	17.2	0.739	-0.436	10	12.2	1.035	0.05	10	11.1	-0.172994	11.65	0	FALSE	FALSE	TRUE	FALSE	0.875	-0.193	10
Q96BN2	Transcriptional adapter 1 OS=Homo sapiens GN=TADA1 PE=1 SV=1 - [TADA1_HUMAN]	TADA1	37.27	4.18	1	1	1	1	335	37.4	7.39	0.926	-0.111	1	NA	0.741	-0.432	1	NA	-0.262746	NA	1.173	0.23	1	NA	1.235	0.305	1	NA	0.267835	NA	1.077	0.107	1	NA	0.911	-0.134	1	NA	-0.00868224	NA		FALSE	FALSE	FALSE		1.119	0.162	1
Q9H0E9	Bromodomain-containing protein 8 OS=Homo sapiens GN=BRD8 PE=1 SV=2 - [BRD8_HUMAN]	BRD8	191.9	4.94	1	4	4	7	1235	135.3	4.6	0.835	-0.26	7	16.8	0.866	-0.208	7	19.6	-0.233617	18.2	0.993	-0.01	7	11.7	1.009	0.013	7	10.1	0.00144197	10.9	0.862	-0.214	7	15	0.801	-0.32	7	9.4	-0.266212	12.2	0	FALSE	FALSE	TRUE	FALSE	0.925	-0.112	7
Q9H2F5	Enhancer of polycomb homolog 1 OS=Homo sapiens GN=EPC1 PE=1 SV=1 - [EPC1_HUMAN]	EPC1	96.46	4.43	1	3	3	3	836	93.4	8.59	0.757	-0.402	3	53.3	0.704	-0.506	3	36.5	-0.453044	44.9	1.252	0.324	3	12.8	1.304	0.383	3	1.7	0.353888	7.25	1.024	0.034	3	47.8	0.904	-0.146	3	34.6	-0.0528949	41.2	4	FALSE	FALSE	TRUE	FALSE	0.99	-0.014	3
Q9NVM4	Protein arginine N-methyltransferase 7 OS=Homo sapiens GN=PRMT7 PE=1 SV=1 - [ANM7_HUMAN]	PRMT7	153.25	7.23	1	4	4	5	692	78.4	5.57	0.822	-0.283	5	13.9	0.885	-0.176	5	6.5	-0.228537	10.2	1.108	0.148	5	18.1	1.023	0.033	5	10.9	0.0915306	14.5	0.912	-0.133	5	11	0.929	-0.106	5	1.9	-0.11951	6.45	0	FALSE	FALSE	TRUE	FALSE	1.098	0.135	5
Q9NQ92	Coordinator of PRMT5 and differentiation stimulator OS=Homo sapiens GN=COPRS PE=1 SV=3 - [COPRS_HUMAN]	COPRS	70.77	14.13	1	1	1	2	184	20.1	4.18	NA	NA	NA	NA	NA	NA	NA	NA	NA	NA	NA	NA	NA	NA	NA	NA	NA	NA	NA	NA	NA	NA	NA	NA	NA	NA	NA	NA	NA	NA		TRUE	FALSE			NA	NA	NA
Q9H0E3	Histone deacetylase complex subunit SAP130 OS=Homo sapiens GN=SAP130 PE=1 SV=1 - [SP130_HUMAN]	SAP130	158.37	7.54	1	7	7	8	1048	110.3	9.83	1.074	0.103	8	24	0.984	-0.023	8	8.7	0.041243	16.35	1.067	0.094	8	12.3	1.08	0.111	8	16.6	0.102322	14.45	1.058	0.081	8	27.3	1.024	0.034	8	23.7	0.0579701	25.5	0	FALSE	FALSE	TRUE	FALSE	1.029	0.041	8
Q9Y230	RuvB-like 2 OS=Homo sapiens GN=RUVBL2 PE=1 SV=3 - [RUVB2_HUMAN]	RUVBL2	3282.29	71.06	1	43	43	136	463	51.1	5.64	0.961	-0.057	136	31.3	0.898	-0.155	136	29.5	-0.105473	30.4	0.96	-0.059	136	21.6	1.034	0.048	136	21.4	-0.00433459	21.5	0.892	-0.165	136	28.4	0.9	-0.152	136	23.6	-0.158429	26	0	FALSE	FALSE	TRUE	FALSE	0.988	-0.017	136
Q9HCU9	Breast cancer metastasis-suppressor 1 OS=Homo sapiens GN=BRMS1 PE=1 SV=1 - [BRMS1_HUMAN]	BRMS1	51.1	5.69	1	1	1	2	246	28.4	4.74	0.925	-0.112	2	27	0.923	-0.116	2	22.2	-0.114035	24.6	1.093	0.128	2	6.5	1.11	0.151	2	21.4	0.139469	13.95	1.001	0.001	2	33.9	1.019	0.027	2	45.3	0.0143553	39.6		FALSE	FALSE	FALSE		1.054	0.076	2
P29374	AT-rich interactive domain-containing protein 4A OS=Homo sapiens GN=ARID4A PE=1 SV=3 - [ARI4A_HUMAN]	ARID4A	78.73	2.94	1	2	3	3	1257	142.7	5.1	1.03	0.043	2	14.1	1.099	0.136	2	5	0.0901759	9.55	0.846	-0.241	2	16.9	0.943	-0.085	2	4.6	-0.160847	10.75	0.864	-0.211	2	31.5	1.032	0.045	2	0.3	-0.077041	15.9		FALSE	FALSE	FALSE		0.883	-0.18	2
Q4LE39	AT-rich interactive domain-containing protein 4B OS=Homo sapiens GN=ARID4B PE=1 SV=2 - [ARI4B_HUMAN]	ARID4B	479.33	9.83	1	8	9	12	1312	147.7	5.12	1.044	0.062	11	25.1	0.968	-0.047	11	15.4	0.00863031	20.25	1.086	0.119	11	9.3	1.205	0.269	11	8.5	0.195977	8.9	1.096	0.132	11	16.4	1.199	0.262	11	14.8	0.198494	15.6	0	FALSE	FALSE	TRUE	FALSE	1.004	0.006	11
O75446	Histone deacetylase complex subunit SAP30 OS=Homo sapiens GN=SAP30 PE=1 SV=1 - [SAP30_HUMAN]	SAP30	133.98	10.45	1	3	3	6	220	23.3	9.17	0.989	-0.016	6	38.9	1.147	0.198	6	12.2	0.0949116	25.55	0.829	-0.271	6	12.7	0.698	-0.519	6	17.5	-0.3893	15.1	0.807	-0.309	6	27.2	0.713	-0.488	6	28.4	-0.395929	27.8	5	FALSE	FALSE	TRUE	FALSE	0.97	-0.044	6
O00422	Histone deacetylase complex subunit SAP18 OS=Homo sapiens GN=SAP18 PE=1 SV=1 - [SAP18_HUMAN]	SAP18	884.29	70.59	1	12	12	47	153	17.5	9.35	0.964	-0.053	46	26.4	0.959	-0.06	46	25.6	-0.0566412	26	1.042	0.059	46	22.9	1.072	0.1	46	21.6	0.0799754	22.25	0.996	-0.006	46	15	0.957	-0.063	46	18.8	-0.0343081	16.9	0	FALSE	FALSE	TRUE	FALSE	0.96	-0.059	46
Q9HAJ7	Histone deacetylase complex subunit SAP30L OS=Homo sapiens GN=SAP30L PE=1 SV=1 - [SP30L_HUMAN]	SAP30L	37.79	6.01	1	1	1	1	183	20.9	9.36	0.951	-0.072	1	NA	1.049	0.069	1	NA	0	NA	0.994	-0.009	1	NA	0.969	-0.045	1	NA	-0.0269398	NA	0.937	-0.094	1	NA	1.011	0.016	1	NA	-0.0380063	NA		FALSE	FALSE	FALSE		0.95	-0.074	1
Q96BD5	PHD finger protein 21A OS=Homo sapiens GN=PHF21A PE=1 SV=1 - [PF21A_HUMAN]	PHF21A	108.41	5.59	1	3	3	3	680	74.8	9.45	1.151	0.203	3	1.1	1.081	0.112	3	6.6	0.158337	3.85	1.136	0.184	3	9.2	1.217	0.283	3	8.1	0.234501	8.65	1.157	0.21	3	9.4	1.124	0.169	3	3.2	0.189666	6.3	0	FALSE	FALSE	TRUE	FALSE	0.974	-0.038	3
Q9P0W2	SWI/SNF-related matrix-associated actin-dependent regulator of chromatin subfamily E member 1-related OS=Homo sapiens GN=HMG20B PE=1 SV=1 - [HM20B_HUMAN]	HMG20B	48.21	2.84	1	1	1	1	317	35.8	9.35	1.168	0.224	1	NA	1.179	0.238	1	NA	0.230818	NA	0.578	-0.791	1	NA	0.588	-0.766	1	NA	-0.778432	NA	0.67	-0.578	1	NA	0.689	-0.537	1	NA	-0.557455	NA		FALSE	FALSE	FALSE		0.874	-0.194	1
Q13227	G protein pathway suppressor 2 OS=Homo sapiens GN=GPS2 PE=1 SV=3 - [GPS2_HUMAN]	GPS2	39.18	2.45	1	1	1	1	327	36.7	9.52	0.812	-0.3	1	NA	0.773	-0.371	1	NA	-0.335517	NA	1.037	0.052	1	NA	1.068	0.095	1	NA	0.0738202	NA	0.834	-0.262	1	NA	0.822	-0.283	1	NA	-0.272297	NA		FALSE	FALSE	FALSE		0.975	-0.037	1
Q7LBC6	Lysine-specific demethylase 3B OS=Homo sapiens GN=KDM3B PE=1 SV=2 - [KDM3B_HUMAN]	KDM3B	1117.15	24.65	1	30	32	51	1761	191.5	7.18	0.935	-0.097	49	18.8	0.951	-0.072	49	24.2	-0.0846703	21.5	0.916	-0.127	49	14.7	0.964	-0.053	49	26.5	-0.0892673	20.6	0.878	-0.188	49	18.8	0.886	-0.175	49	21.3	-0.181149	20.05	0	FALSE	FALSE	TRUE	FALSE	0.96	-0.059	49
Q9Y4C1	Lysine-specific demethylase 3A OS=Homo sapiens GN=KDM3A PE=1 SV=4 - [KDM3A_HUMAN]	KDM3A	181.16	5.75	1	4	5	6	1321	147.2	8.07	1.096	0.132	5	11.1	0.959	-0.06	5	22.4	0.0391384	16.75	1.027	0.038	5	7.4	1.036	0.051	5	19.6	0.0447438	13.5	1.215	0.281	5	19	0.892	-0.165	5	69.5	0.0751903	44.25	0	FALSE	FALSE	TRUE	FALSE	1.129	0.175	5
O75151	Lysine-specific demethylase PHF2 OS=Homo sapiens GN=PHF2 PE=1 SV=4 - [PHF2_HUMAN]	PHF2	75.43	3.19	1	3	3	3	1096	120.7	9.17	1.558	0.64	3	9.5	1.478	0.564	3	43.3	0.602172	26.4	1.192	0.253	3	14.4	1.034	0.048	3	5.7	0.154454	10.05	1.962	0.972	3	6.4	1.58	0.66	3	22	0.824564	14.2	3	FALSE	FALSE	TRUE	FALSE	1.165	0.22	3
Q9Y2K7	Lysine-specific demethylase 2A OS=Homo sapiens GN=KDM2A PE=1 SV=3 - [KDM2A_HUMAN]	KDM2A	138.33	2.07	1	2	2	5	1162	132.7	7.58	0.997	-0.004	5	2.8	0.995	-0.007	5	3.2	-0.00578235	3	1.033	0.047	5	2.4	1.014	0.02	5	0.8	0.0335111	1.6	1.019	0.027	5	4.4	1.007	0.01	5	4.8	0.0186342	4.6	0	FALSE	FALSE	TRUE	FALSE	0.92	-0.12	5
P41229	Lysine-specific demethylase 5C OS=Homo sapiens GN=KDM5C PE=1 SV=2 - [KDM5C_HUMAN]	KDM5C	80.26	3.21	2	4	4	4	1560	175.6	5.58	0.938	-0.092	4	21.2	0.901	-0.15	4	6.6	-0.121079	13.9	0.883	-0.18	4	11.8	1.006	0.009	4	3.6	-0.0823773	7.7	0.845	-0.243	4	10.1	0.924	-0.114	4	25.8	-0.177066	17.95	0	FALSE	FALSE	TRUE	FALSE	0.942	-0.086	4
Q6NYC1	Bifunctional arginine demethylase and lysyl-hydroxylase JMJD6 OS=Homo sapiens GN=JMJD6 PE=1 SV=1 - [JMJD6_HUMAN]	JMJD6	199.21	13.9	1	5	5	8	403	46.4	8.69	1.065	0.091	8	9.7	1.084	0.116	8	4.6	0.103665	7.15	1.158	0.212	8	15.1	1.218	0.285	8	17.4	0.248535	16.25	1.174	0.231	8	22.6	1.317	0.397	8	13.9	0.316725	18.25	1	FALSE	FALSE	TRUE	FALSE	1.003	0.004	8
Q8NHM5	Lysine-specific demethylase 2B OS=Homo sapiens GN=KDM2B PE=1 SV=1 - [KDM2B_HUMAN]	KDM2B	31.94	1.57	1	2	2	2	1336	152.5	8.56	1.155	0.208	2	39.5	0.921	-0.119	2	72.4	0.0538064	55.95	1.347	0.43	2	15.5	0.721	-0.472	2	105.6	0.0482362	60.55	1.542	0.625	2	57.5	0.661	-0.597	2	21.9	0.139469	39.7		FALSE	FALSE	FALSE		1.48	0.566	2
P29375	Lysine-specific demethylase 5A OS=Homo sapiens GN=KDM5A PE=1 SV=3 - [KDM5A_HUMAN]	KDM5A	66.28	3.2	1	3	3	3	1690	192	6.49	0.925	-0.112	3	2.1	1.091	0.126	3	6.9	0.0114956	4.5	1.101	0.139	3	3.7	0.96	-0.059	3	11.9	0.0433445	7.8	1.021	0.03	3	1.7	1.129	0.175	3	9.1	0.104337	5.4	0	FALSE	FALSE	TRUE	FALSE	1.037	0.052	3
Q6B0I6	Lysine-specific demethylase 4D OS=Homo sapiens GN=KDM4D PE=1 SV=3 - [KDM4D_HUMAN]	KDM4D	47.2	2.29	1	1	1	1	523	58.6	9.16	1.109	0.149	1	NA	1.041	0.058	1	NA	0.104337	NA	1.255	0.328	1	NA	0.839	-0.253	1	NA	0.0662614	NA	1.38	0.465	1	NA	0.869	-0.203	1	NA	0.169284	NA		FALSE	FALSE	FALSE		1.24	0.31	1
Q8NB78	Lysine-specific histone demethylase 1B OS=Homo sapiens GN=KDM1B PE=1 SV=3 - [KDM1B_HUMAN]	KDM1B	110.16	2.92	1	2	2	3	822	92	7.87	1.106	0.145	3	13.9	1.251	0.323	3	6.2	0.236952	10.05	1.017	0.024	3	29.8	1.007	0.01	3	13.1	0.0172093	21.45	1.114	0.156	3	12.7	1.142	0.192	3	15	0.173767	13.85	0	FALSE	FALSE	TRUE	FALSE	0.916	-0.127	3
Q9UGL1	Lysine-specific demethylase 5B OS=Homo sapiens GN=KDM5B PE=1 SV=3 - [KDM5B_HUMAN]	KDM5B	162.26	5.63	1	7	7	7	1544	175.5	6.7	1.201	0.264	7	12	1.343	0.425	7	12.8	0.347099	12.4	0.892	-0.165	7	13.2	0.839	-0.253	7	12.1	-0.208394	12.65	1.134	0.181	7	25.3	1.079	0.11	7	7.1	0.146003	16.2	6	FALSE	FALSE	TRUE	FALSE	1.085	0.118	7
Q9BQA1	Methylosome protein 50 OS=Homo sapiens GN=WDR77 PE=1 SV=1 - [MEP50_HUMAN]	WDR77	495.32	30.99	2	8	8	16	342	36.7	5.17	0.959	-0.06	16	27.1	0.912	-0.133	16	28.3	-0.0961904	27.7	0.879	-0.186	16	12.8	1.019	0.027	16	21.9	-0.07552	17.35	0.823	-0.281	16	23.5	0.92	-0.12	16	25.9	-0.198427	24.7	0	FALSE	FALSE	TRUE	FALSE	0.966	-0.05	16
Q96L73	Histone-lysine N-methyltransferase, H3 lysine-36 and H4 lysine-20 specific OS=Homo sapiens GN=NSD1 PE=1 SV=1 - [NSD1_HUMAN]	NSD1	34.75	0.78	1	1	2	2	2696	296.5	8.03	1.114	0.156	1	NA	0.997	-0.004	1	NA	0.0779266	NA	0.926	-0.111	1	NA	0.889	-0.17	1	NA	-0.14003	NA	1.023	0.033	1	NA	0.882	-0.181	1	NA	-0.070209	NA		FALSE	FALSE	FALSE		1.128	0.174	1
Q9H5I1	Histone-lysine N-methyltransferase SUV39H2 OS=Homo sapiens GN=SUV39H2 PE=1 SV=2 - [SUV92_HUMAN]	SUV39H2	54.25	4.39	1	2	2	2	410	46.7	8.19	1.186	0.246	1	NA	0.982	-0.026	1	NA	0.116365	NA	0.64	-0.644	1	NA	1.025	0.036	1	NA	-0.264478	NA	0.752	-0.411	1	NA	1.002	0.003	1	NA	-0.189351	NA		FALSE	FALSE	FALSE		0.947	-0.079	1
Q8TEK3	Histone-lysine N-methyltransferase, H3 lysine-79 specific OS=Homo sapiens GN=DOT1L PE=1 SV=2 - [DOT1L_HUMAN]	DOT1L	24.17	0.69	1	1	1	1	1739	184.7	9.33	0.736	-0.442	1	NA	0.885	-0.176	1	NA	-0.303116	NA	1.449	0.535	1	NA	1.037	0.052	1	NA	0.313826	NA	1.057	0.08	1	NA	0.913	-0.131	1	NA	-0.0218044	NA		FALSE	FALSE	FALSE		0.964	-0.053	1
Q4FZB7	Histone-lysine N-methyltransferase KMT5B OS=Homo sapiens GN=KMT5B PE=1 SV=4 - [KMT5B_HUMAN]	KMT5B	78.99	2.15	1	1	1	1	885	99.1	8.78	0.967	-0.048	1	NA	1.31	0.39	1	NA	0.187134	NA	1.189	0.25	1	NA	1.017	0.024	1	NA	0.141433	NA	1.139	0.188	1	NA	1.325	0.406	1	NA	0.301002	NA		FALSE	FALSE	FALSE		0.943	-0.085	1
Q86TU7	Histone-lysine N-methyltransferase setd3 OS=Homo sapiens GN=SETD3 PE=1 SV=1 - [SETD3_HUMAN]	SETD3	479.56	23.91	1	13	13	20	594	67.2	5.96	1.008	0.011	20	39.8	1.041	0.058	20	32.3	0.03492	36.05	0.924	-0.114	20	19.3	0.881	-0.183	20	20.6	-0.148001	19.95	0.944	-0.083	20	27	0.954	-0.068	20	16.7	-0.07552	21.85	0	FALSE	FALSE	TRUE	FALSE	1.022	0.031	20
Q8WTS6	Histone-lysine N-methyltransferase SETD7 OS=Homo sapiens GN=SETD7 PE=1 SV=1 - [SETD7_HUMAN]	SETD7	42.53	2.19	1	1	1	1	366	40.7	4.63	1.146	0.197	1	NA	1.066	0.092	1	NA	0.145351	NA	0.957	-0.063	1	NA	0.897	-0.157	1	NA	-0.109359	NA	1.087	0.12	1	NA	0.952	-0.071	1	NA	0.0278618	NA		FALSE	FALSE	FALSE		1.094	0.13	1
Q9BYW2	Histone-lysine N-methyltransferase SETD2 OS=Homo sapiens GN=SETD2 PE=1 SV=3 - [SETD2_HUMAN]	SETD2	75.6	2.11	1	5	5	5	2564	287.4	6.14	1.029	0.041	5	7.9	0.884	-0.178	5	5.4	-0.0641631	6.65	1.047	0.066	5	3.6	1.193	0.255	5	2.1	0.163499	2.85	0.982	-0.026	5	15.7	1.017	0.024	5	3.9	-0.000721528	9.8	0	FALSE	FALSE	TRUE	FALSE	1.087	0.12	5
Q15047	Histone-lysine N-methyltransferase SETDB1 OS=Homo sapiens GN=SETDB1 PE=1 SV=1 - [SETB1_HUMAN]	SETDB1	259.15	12.39	1	12	12	12	1291	143.1	6.02	0.908	-0.139	12	18.8	0.909	-0.138	12	29.7	-0.138442	24.25	0.991	-0.013	12	18.3	1.196	0.258	12	17	0.128953	17.65	0.948	-0.077	12	18	1	0	12	16.7	-0.0380063	17.35	0	FALSE	FALSE	TRUE	FALSE	1.002	0.003	12
Q9H7B4	Histone-lysine N-methyltransferase SMYD3 OS=Homo sapiens GN=SMYD3 PE=1 SV=4 - [SMYD3_HUMAN]	SMYD3	195.79	19.63	3	7	8	11	428	49.1	7.25	1.325	0.406	8	20	1.41	0.496	8	13	0.451541	16.5	1.129	0.175	8	14.3	1.12	0.163	8	14.4	0.169284	14.35	1.454	0.54	8	13.8	1.454	0.54	8	22.9	0.540027	18.35	3	FALSE	FALSE	TRUE	FALSE	1.066	0.092	8
Q9HAZ2	PR domain zinc finger protein 16 OS=Homo sapiens GN=PRDM16 PE=1 SV=3 - [PRD16_HUMAN]	PRDM16	60.96	3.45	1	3	3	3	1276	140.2	6.21	1.152	0.204	3	22.6	0.843	-0.246	3	3.3	-0.00361125	12.95	0.825	-0.278	3	27	0.848	-0.238	3	65.4	-0.257563	46.2	0.788	-0.344	3	15.7	0.711	-0.492	3	9.7	-0.416	12.7	5	FALSE	FALSE	TRUE	FALSE	1.043	0.061	3
Q6VMQ6	Activating transcription factor 7-interacting protein 1 OS=Homo sapiens GN=ATF7IP PE=1 SV=3 - [MCAF1_HUMAN]	ATF7IP	611.71	17.48	1	13	13	23	1270	136.3	4.7	0.898	-0.155	23	11.6	0.862	-0.214	23	17.1	-0.184425	14.35	1.013	0.019	23	8.6	1.093	0.128	23	8.4	0.0745054	8.5	0.884	-0.178	23	20.5	1.012	0.017	23	21.4	-0.077041	20.95	0	FALSE	FALSE	TRUE	FALSE	0.95	-0.074	23
Q6ZN18	Zinc finger protein AEBP2 OS=Homo sapiens GN=AEBP2 PE=1 SV=2 - [AEBP2_HUMAN]	AEBP2	23.04	2.32	1	1	1	2	517	54.4	5.21	0.954	-0.068	2	13.3	0.883	-0.18	2	12.7	-0.122648	13	1.048	0.068	2	6.6	1.14	0.189	2	3.3	0.129613	4.95	0.991	-0.013	2	6.7	1.002	0.003	2	9.4	-0.00505829	8.05		FALSE	FALSE	FALSE		0.991	-0.013	2
O43463	Histone-lysine N-methyltransferase SUV39H1 OS=Homo sapiens GN=SUV39H1 PE=1 SV=1 - [SUV91_HUMAN]	SUV39H1	52.49	3.88	1	1	2	2	412	47.9	8.03	0.677	-0.563	1	NA	0.57	-0.811	1	NA	-0.681539	NA	0.792	-0.336	1	NA	1.005	0.007	1	NA	-0.15441	NA	0.532	-0.911	1	NA	0.57	-0.811	1	NA	-0.859876	NA		FALSE	FALSE	FALSE		0.972	-0.041	1
Q9UPT9	Ubiquitin carboxyl-terminal hydrolase 22 OS=Homo sapiens GN=USP22 PE=1 SV=2 - [UBP22_HUMAN]	USP22	61.02	7.43	3	4	4	5	525	59.9	8.05	1.078	0.108	4	6.9	0.976	-0.035	4	8.9	0.0384362	7.9	1.178	0.236	4	5.4	1.169	0.225	4	9.8	0.230818	7.6	1.213	0.279	4	12.3	1.134	0.181	4	18.9	0.230818	15.6	0	FALSE	FALSE	TRUE	FALSE	0.967	-0.048	4
O75528	Transcriptional adapter 3 OS=Homo sapiens GN=TADA3 PE=1 SV=1 - [TADA3_HUMAN]	TADA3	150.34	13.43	1	5	5	7	432	48.9	6.27	0.89	-0.168	7	13.2	0.853	-0.229	7	13.1	-0.198427	13.15	0.935	-0.097	7	11	0.921	-0.119	7	3.7	-0.107803	7.35	0.863	-0.213	7	6.5	0.794	-0.333	7	15.3	-0.271426	10.9	0	FALSE	FALSE	TRUE	FALSE	1.053	0.075	7
O15294	UDP-N-acetylglucosamine--peptide N-acetylglucosaminyltransferase 110 kDa subunit OS=Homo sapiens GN=OGT PE=1 SV=3 - [OGT1_HUMAN]	OGT	799.85	24.19	1	23	23	35	1046	116.8	6.7	0.9	-0.152	35	22.3	0.899	-0.154	35	17.5	-0.152805	19.9	1.185	0.245	35	10.4	1.299	0.377	35	10	0.312665	10.2	1.064	0.089	35	13.7	1.183	0.242	35	16.6	0.168	15.15	1	FALSE	FALSE	TRUE	FALSE	0.975	-0.037	35
O60678	Protein arginine N-methyltransferase 3 OS=Homo sapiens GN=PRMT3 PE=1 SV=3 - [ANM3_HUMAN]	PRMT3	318.92	16.57	1	7	7	14	531	59.8	5.35	1.107	0.147	14	32.1	1.144	0.194	14	20.8	0.170566	26.45	0.826	-0.276	14	13.4	0.825	-0.278	14	18.2	-0.27666	15.8	0.995	-0.007	14	31.3	1.027	0.038	14	40.6	0.015783	35.95	0	FALSE	FALSE	TRUE	FALSE	0.948	-0.077	14
O15047	Histone-lysine N-methyltransferase SETD1A OS=Homo sapiens GN=SETD1A PE=1 SV=3 - [SET1A_HUMAN]	SETD1A	325.77	5.33	1	8	8	15	1707	185.9	5.14	0.966	-0.05	15	14.9	0.901	-0.15	15	23.4	-0.0992781	19.15	1.078	0.108	15	9.8	1.215	0.281	15	13.4	0.197236	11.6	1.083	0.115	15	15.3	1.067	0.094	15	13.7	0.104337	14.5	0	FALSE	FALSE	TRUE	FALSE	1.028	0.04	15
Q9UPS6	Histone-lysine N-methyltransferase SETD1B OS=Homo sapiens GN=SETD1B PE=1 SV=3 - [SET1B_HUMAN]	SETD1B	37.08	1.17	1	2	2	2	1966	212.7	4.96	0.903	-0.147	2	8.5	0.939	-0.091	2	17	-0.118727	12.75	1.059	0.083	2	14.9	0.998	-0.003	2	3.5	0.0405418	9.2	0.948	-0.077	2	6.3	0.932	-0.102	2	13.5	-0.0892673	9.9		FALSE	FALSE	FALSE		0.983	-0.025	2
Q9C005	Protein dpy-30 homolog OS=Homo sapiens GN=DPY30 PE=1 SV=1 - [DPY30_HUMAN]	DPY30	104.02	27.27	1	2	2	6	99	11.2	4.88	0.849	-0.236	6	10.8	0.961	-0.057	6	13.5	-0.14401	12.15	0.939	-0.091	6	6.6	0.956	-0.065	6	4.9	-0.0778022	5.75	0.848	-0.238	6	22.6	0.886	-0.175	6	22.5	-0.205896	22.55	0	FALSE	FALSE	TRUE	FALSE	0.956	-0.065	6
Q9UMN6	Histone-lysine N-methyltransferase 2B OS=Homo sapiens GN=KMT2B PE=1 SV=1 - [KMT2B_HUMAN]	KMT2B	34.97	0.41	1	1	1	1	2715	293.3	8.22	1.127	0.172	1	NA	1.046	0.065	1	NA	0.119688	NA	1.093	0.128	1	NA	0.996	-0.006	1	NA	0.0628125	NA	1.22	0.287	1	NA	1.037	0.052	1	NA	0.174406	NA		FALSE	FALSE	FALSE		0.996	-0.006	1
Q92925	SWI/SNF-related matrix-associated actin-dependent regulator of chromatin subfamily D member 2 OS=Homo sapiens GN=SMARCD2 PE=1 SV=3 - [SMRD2_HUMAN]	SMARCD2	355.02	8.29	1	2	4	10	531	58.9	9.64	0.724	-0.466	2	27.6	0.67	-0.578	2	9.1	-0.520769	18.35	1.17	0.227	2	11.2	1.194	0.256	2	1.9	0.24123	6.55	0.839	-0.253	2	16.1	0.795	-0.331	2	11.1	-0.291592	13.6		FALSE	FALSE	FALSE		1.128	0.174	2
Q8TAQ2	SWI/SNF complex subunit SMARCC2 OS=Homo sapiens GN=SMARCC2 PE=1 SV=1 - [SMRC2_HUMAN]	SMARCC2	2688.46	30.4	1	32	37	103	1214	132.8	5.69	1.08	0.111	81	26.2	1.008	0.011	81	30.3	0.0621217	28.25	1.151	0.203	81	16.8	1.24	0.31	81	21.7	0.257614	19.25	1.247	0.318	81	28.3	1.231	0.3	81	23.9	0.309176	26.1	1	FALSE	FALSE	TRUE	FALSE	1.007	0.01	81
P51531	Probable global transcription activator SNF2L2 OS=Homo sapiens GN=SMARCA2 PE=1 SV=2 - [SMCA2_HUMAN]	SMARCA2	499.34	11.32	1	3	19	29	1590	181.2	7.2	1.206	0.27	3	7	1.254	0.327	3	12.1	0.298658	9.55	0.917	-0.125	3	1.9	0.886	-0.175	3	7.8	-0.149601	4.85	1.097	0.134	3	5.1	1.105	0.144	3	7.7	0.138814	6.4	0	FALSE	FALSE	TRUE	FALSE	0.955	-0.066	3
O14497	AT-rich interactive domain-containing protein 1A OS=Homo sapiens GN=ARID1A PE=1 SV=3 - [ARI1A_HUMAN]	ARID1A	1331.42	17.64	1	30	32	59	2285	241.9	6.7	1.065	0.091	55	20.6	1	0	55	20	0.0461418	20.3	1.049	0.069	55	16.6	1.138	0.187	55	16.6	0.128953	16.6	1.096	0.132	55	12.4	1.152	0.204	55	18.6	0.168642	15.5	0	FALSE	FALSE	TRUE	FALSE	0.964	-0.053	55
Q92922	SWI/SNF complex subunit SMARCC1 OS=Homo sapiens GN=SMARCC1 PE=1 SV=3 - [SMRC1_HUMAN]	SMARCC1	1429.4	30.05	1	28	33	78	1105	122.8	5.76	1.03	0.043	56	24.2	1.035	0.05	56	26.3	0.0461418	25.25	0.858	-0.221	56	18.4	0.88	-0.184	56	22.3	-0.202572	20.35	0.891	-0.167	56	19.8	0.948	-0.077	56	18.8	-0.121079	19.3	0	FALSE	FALSE	TRUE	FALSE	0.951	-0.072	56
Q12824	SWI/SNF-related matrix-associated actin-dependent regulator of chromatin subfamily B member 1 OS=Homo sapiens GN=SMARCB1 PE=1 SV=2 - [SNF5_HUMAN]	SMARCB1	803.22	41.56	1	14	14	29	385	44.1	6.23	1.008	0.011	29	17.2	1.004	0.006	29	12.7	0.00863031	14.95	1.057	0.08	29	14.6	1.086	0.119	29	17.1	0.0996319	15.85	1.061	0.085	29	18.7	1.083	0.115	29	20.1	0.100305	19.4	0	FALSE	FALSE	TRUE	FALSE	0.95	-0.074	29
Q969G3	SWI/SNF-related matrix-associated actin-dependent regulator of chromatin subfamily E member 1 OS=Homo sapiens GN=SMARCE1 PE=1 SV=2 - [SMCE1_HUMAN]	SMARCE1	930.94	59.85	1	19	20	39	411	46.6	4.88	1.014	0.02	36	17.2	0.961	-0.057	36	26.9	-0.0181473	22.05	1.017	0.024	36	13.8	1.157	0.21	36	20	0.120352	16.9	1.052	0.073	36	15.3	1.08	0.111	36	18.2	0.0922074	16.75	0	FALSE	FALSE	TRUE	FALSE	1.003	0.004	36
Q86U86	Protein polybromo-1 OS=Homo sapiens GN=PBRM1 PE=1 SV=1 - [PB1_HUMAN]	PBRM1	589.43	18.12	1	25	25	31	1689	192.8	6.89	1.06	0.084	31	18.5	1.152	0.204	31	15	0.145351	16.75	1.077	0.107	31	11	0.987	-0.019	31	13.2	0.045443	12.1	1.101	0.139	31	15.3	1.072	0.1	31	16.1	0.119688	15.7	0	FALSE	FALSE	TRUE	FALSE	0.991	-0.013	31
Q8NFD5	AT-rich interactive domain-containing protein 1B OS=Homo sapiens GN=ARID1B PE=1 SV=2 - [ARI1B_HUMAN]	ARID1B	778.46	10.6	1	13	15	23	2236	236	6.73	0.954	-0.068	19	20.2	0.955	-0.066	19	22	-0.0671829	21.1	1.146	0.197	19	13.1	1.208	0.273	19	18.6	0.235114	15.85	1.081	0.112	19	21.2	1.15	0.202	19	15.6	0.157691	18.4	0	FALSE	FALSE	TRUE	FALSE	0.989	-0.016	19
Q68CP9	AT-rich interactive domain-containing protein 2 OS=Homo sapiens GN=ARID2 PE=1 SV=2 - [ARID2_HUMAN]	ARID2	247.81	5.4	1	8	8	10	1835	197.3	7.42	0.927	-0.109	10	19.6	0.932	-0.102	10	30.1	-0.105473	24.85	1.193	0.255	10	14.6	1.174	0.231	10	15.1	0.24306	14.85	1.04	0.057	10	20.1	1.07	0.098	10	24.4	0.077243	22.25	0	FALSE	FALSE	TRUE	FALSE	0.95	-0.074	10
Q96GM5	SWI/SNF-related matrix-associated actin-dependent regulator of chromatin subfamily D member 1 OS=Homo sapiens GN=SMARCD1 PE=1 SV=2 - [SMRD1_HUMAN]	SMARCD1	882.44	35.73	1	15	17	30	515	58.2	9.25	1.069	0.096	22	27.9	0.954	-0.068	22	25.8	0.0164963	26.85	1.094	0.13	22	18.5	1.236	0.306	22	22.6	0.22033	20.55	1.1	0.138	22	20.9	1.096	0.132	22	27.1	0.134878	24	0	FALSE	FALSE	TRUE	FALSE	1.018	0.026	22
O94805	Actin-like protein 6B OS=Homo sapiens GN=ACTL6B PE=1 SV=1 - [ACL6B_HUMAN]	ACTL6B	239.54	5.63	1	1	3	11	426	46.8	5.71	0.939	-0.091	1	NA	0.788	-0.344	1	NA	-0.211732	NA	1.936	0.953	1	NA	2.121	1.085	1	NA	1.02041	NA	1.802	0.85	1	NA	1.662	0.733	1	NA	0.792439	NA		FALSE	FALSE	FALSE		1.055	0.077	1
Q96LA8	Protein arginine N-methyltransferase 6 OS=Homo sapiens GN=PRMT6 PE=1 SV=1 - [ANM6_HUMAN]	PRMT6	111.85	10.13	1	3	3	3	375	41.9	5.44	0.951	-0.072	3	29.4	0.876	-0.191	3	35.8	-0.130523	32.6	1.067	0.094	3	2	1.205	0.269	3	8.4	0.183963	5.2	0.935	-0.097	3	18	1.05	0.07	3	25.5	-0.010861	21.75	0	FALSE	FALSE	TRUE	FALSE	0.964	-0.053	3
O95619	YEATS domain-containing protein 4 OS=Homo sapiens GN=YEATS4 PE=1 SV=1 - [YETS4_HUMAN]	YEATS4	120.66	8.81	1	2	2	7	227	26.5	8.41	0.883	-0.18	7	24.2	0.832	-0.265	7	30.1	-0.221791	27.15	0.98	-0.029	7	10.5	1.057	0.08	7	8.8	0.026446	9.65	0.819	-0.288	7	23.8	0.794	-0.333	7	5.8	-0.310254	14.8	4	FALSE	FALSE	TRUE	FALSE	0.916	-0.127	7
Q4AC94	C2 domain-containing protein 3 OS=Homo sapiens GN=C2CD3 PE=1 SV=4 - [C2CD3_HUMAN]	C2CD3	60.95	1.06	1	2	2	2	2353	260.2	7.12	0.878	-0.188	2	7.1	0.797	-0.327	2	9	-0.255839	8.05	0.84	-0.252	2	0.2	0.87	-0.201	2	11.2	-0.226004	5.7	0.732	-0.45	2	7.3	0.69	-0.535	2	2.2	-0.492079	4.75		FALSE	FALSE	FALSE		1.085	0.118	2
Q96NL6	Sodium channel and clathrin linker 1 OS=Homo sapiens GN=SCLT1 PE=1 SV=2 - [SCLT1_HUMAN]	SCLT1	46.37	7.56	1	3	4	5	688	80.9	6.07	0.924	-0.114	3	11.2	0.923	-0.116	3	15.7	-0.114816	13.45	1.015	0.021	3	9.7	1.134	0.181	3	5.1	0.103665	7.4	0.904	-0.146	3	10.7	0.97	-0.044	3	0.3	-0.093879	5.5	0	FALSE	FALSE	TRUE	FALSE	0.97	-0.044	3
Q8IW35	Centrosomal protein of 97 kDa OS=Homo sapiens GN=CEP97 PE=1 SV=1 - [CEP97_HUMAN]	CEP97	316.89	12.95	1	8	8	15	865	96.9	5.02	1.13	0.176	15	18	1.116	0.158	15	19.5	0.167358	18.75	1.051	0.072	15	16	1.102	0.14	15	18.8	0.106348	17.4	1.222	0.289	15	12.2	1.262	0.336	15	5	0.312665	8.6	3	FALSE	FALSE	TRUE	FALSE	0.986	-0.02	15
Q5HYA8	Meckelin OS=Homo sapiens GN=TMEM67 PE=1 SV=2 - [MKS3_HUMAN]	TMEM67	46.34	1.41	1	1	1	1	995	111.7	6.77	1.009	0.013	1	NA	0.831	-0.267	1	NA	-0.120294	NA	0.843	-0.246	1	NA	1.071	0.099	1	NA	-0.0634092	NA	0.844	-0.245	1	NA	0.885	-0.176	1	NA	-0.210062	NA		FALSE	FALSE	FALSE		1.085	0.118	1
Q15019	Septin-2 OS=Homo sapiens GN=SEPT2 PE=1 SV=1 - [SEPT2_HUMAN]	37500	4359.05	72.58	1	35	35	164	361	41.5	6.6	0.984	-0.023	163	22.9	0.966	-0.05	163	27.5	-0.0365259	25.2	0.936	-0.095	163	17.8	1.02	0.029	163	24.5	-0.0320936	21.15	0.917	-0.125	163	17.7	0.994	-0.009	163	20.1	-0.0656722	18.9	0	FALSE	FALSE	TRUE	FALSE	0.979	-0.031	163
Q9Y592	Centrosomal protein of 83 kDa OS=Homo sapiens GN=CEP83 PE=1 SV=2 - [CEP83_HUMAN]	CEP83	68.03	2.6	1	2	2	3	693	82	6.28	1.202	0.265	3	2.9	1.023	0.033	3	0.4	0.153805	1.65	0.932	-0.102	3	1.2	0.946	-0.08	3	1.8	-0.0908029	1.5	1.101	0.139	3	8.4	0.972	-0.041	3	9	0.0517201	8.7	0	FALSE	FALSE	TRUE	FALSE	1.061	0.085	3
Q5TB80	Centrosomal protein of 162 kDa OS=Homo sapiens GN=CEP162 PE=1 SV=2 - [CE162_HUMAN]	CEP162	0	0.57	1	1	1	1	1403	161.8	5.47	1.414	0.5	1	NA	1.097	0.134	1	NA	0.328262	NA	1.504	0.589	1	NA	0.767	-0.383	1	NA	0.183328	NA	2.108	1.076	1	NA	0.837	-0.257	1	NA	0.558268	NA		FALSE	FALSE	FALSE		1.325	0.406	1
Q15051	IQ calmodulin-binding motif-containing protein 1 OS=Homo sapiens GN=IQCB1 PE=1 SV=1 - [IQCB1_HUMAN]	IQCB1	32.46	3.34	1	2	2	3	598	68.9	9.1	1.046	0.065	3	0.6	0.917	-0.125	3	2.9	-0.0269398	1.75	0.838	-0.255	3	10.7	0.844	-0.245	3	13	-0.249822	11.85	0.808	-0.308	3	7.9	0.77	-0.377	3	15.9	-0.341903	11.9	5	FALSE	FALSE	TRUE	FALSE	1.045	0.064	3
Q96ST8	Centrosomal protein of 89 kDa OS=Homo sapiens GN=CEP89 PE=1 SV=3 - [CEP89_HUMAN]	CEP89	0	0.89	1	1	1	1	783	89.5	6.8	0.743	-0.429	1	NA	0.698	-0.519	1	NA	-0.47293	NA	1.005	0.007	1	NA	1.015	0.021	1	NA	0.0143553	NA	0.741	-0.432	1	NA	0.706	-0.502	1	NA	-0.466935	NA		FALSE	FALSE	FALSE		1.036	0.051	1
Q7Z494	Nephrocystin-3 OS=Homo sapiens GN=NPHP3 PE=1 SV=1 - [NPHP3_HUMAN]	NPHP3	36.1	1.5	1	2	2	3	1330	150.8	6.76	0.985	-0.022	1	NA	0.998	-0.003	1	NA	-0.0123153	NA	0.764	-0.388	1	NA	0.913	-0.131	1	NA	-0.254117	NA	0.746	-0.423	1	NA	0.907	-0.141	1	NA	-0.274913	NA		FALSE	FALSE	FALSE		0.864	-0.211	1
A6NIH7	Protein unc-119 homolog B OS=Homo sapiens GN=UNC119B PE=1 SV=1 - [U119B_HUMAN]	UNC119B	391.91	40.64	1	9	10	16	251	28.1	5.68	0.826	-0.276	14	18.3	0.789	-0.342	14	17	-0.308466	17.65	0.88	-0.184	14	19.9	0.944	-0.083	14	19.9	-0.132894	19.9	0.793	-0.335	14	22.9	0.849	-0.236	14	31.3	-0.284546	27.1	4	FALSE	FALSE	TRUE	FALSE	0.988	-0.017	14
P36405	ADP-ribosylation factor-like protein 3 OS=Homo sapiens GN=ARL3 PE=1 SV=2 - [ARL3_HUMAN]	ARL3	1482.48	86.81	1	16	16	53	182	20.4	7.24	0.948	-0.077	53	12.8	0.958	-0.062	53	13.3	-0.0694519	13.05	1.18	0.239	53	14.1	1.358	0.441	53	13.7	0.343692	13.9	1.148	0.199	53	15.1	1.352	0.435	53	17.5	0.321928	16.3	1	FALSE	FALSE	TRUE	FALSE	0.952	-0.071	53
O75695	Protein XRP2 OS=Homo sapiens GN=RP2 PE=1 SV=4 - [XRP2_HUMAN]	RP2	239.57	16.29	1	7	7	16	350	39.6	5.12	1.226	0.294	16	42.5	1.171	0.228	16	35.1	0.26123	38.8	1.059	0.083	16	33.8	1.027	0.038	16	25.4	0.0607392	29.6	1.275	0.35	16	9.3	1.291	0.368	16	12.2	0.359521	10.75	3	FALSE	FALSE	TRUE	FALSE	0.991	-0.013	16
Q9ULH1	Arf-GAP with SH3 domain, ANK repeat and PH domain-containing protein 1 OS=Homo sapiens GN=ASAP1 PE=1 SV=4 - [ASAP1_HUMAN]	ASAP1	409.06	15.32	1	13	14	19	1129	125.4	7.31	0.97	-0.044	17	11.2	1.017	0.024	17	17.7	-0.00940813	14.45	1.113	0.154	17	16.4	1.124	0.169	17	12	0.161565	14.2	1.102	0.14	17	15.5	1.167	0.223	17	9.4	0.182057	12.45	0	FALSE	FALSE	TRUE	FALSE	0.988	-0.017	17
Q13563	Polycystin-2 OS=Homo sapiens GN=PKD2 PE=1 SV=3 - [PKD2_HUMAN]	PKD2	55.27	1.34	1	1	1	1	968	109.6	5.69	1.038	0.054	1	NA	1.055	0.077	1	NA	0.0655723	NA	1.019	0.027	1	NA	1.008	0.011	1	NA	0.0193461	NA	1.048	0.068	1	NA	1.059	0.083	1	NA	0.0751903	NA		FALSE	FALSE	FALSE		0.997	-0.004	1
Q9UBN7	Histone deacetylase 6 OS=Homo sapiens GN=HDAC6 PE=1 SV=2 - [HDAC6_HUMAN]	HDAC6	635.27	8.23	1	12	12	31	1215	131.3	5.3	1.101	0.139	28	18.8	1.122	0.166	28	28	0.152508	23.4	1.138	0.187	28	15.6	1.185	0.245	28	18.7	0.215989	17.15	1.237	0.307	28	33.2	1.34	0.422	28	24.3	0.365693	28.75	1	FALSE	FALSE	TRUE	FALSE	1.001	0.001	28
Q96EX3	WD repeat-containing protein 34 OS=Homo sapiens GN=WDR34 PE=1 SV=2 - [WDR34_HUMAN]	WDR34	261.39	5.6	1	2	2	7	536	57.8	6.64	0.835	-0.26	7	22.9	0.866	-0.208	7	3.1	-0.233617	13	0.918	-0.123	7	10.3	0.904	-0.146	7	3.6	-0.134477	6.95	0.745	-0.425	7	8.3	0.773	-0.371	7	5.7	-0.397828	7	5	FALSE	FALSE	TRUE	FALSE	0.927	-0.109	7
Q8TDR0	TRAF3-interacting protein 1 OS=Homo sapiens GN=TRAF3IP1 PE=1 SV=1 - [MIPT3_HUMAN]	TRAF3IP1	0	1.3	1	1	1	1	691	78.6	7.93	1.071	0.099	1	NA	0.809	-0.306	1	NA	-0.0892673	NA	1.151	0.203	1	NA	0.966	-0.05	1	NA	0.0820213	NA	1.222	0.289	1	NA	0.778	-0.362	1	NA	0	NA		FALSE	FALSE	FALSE		1.257	0.33	1
Q9H7X7	Intraflagellar transport protein 22 homolog OS=Homo sapiens GN=IFT22 PE=1 SV=1 - [IFT22_HUMAN]	IFT22	225.18	18.38	1	2	2	5	185	20.8	5.15	0.846	-0.241	5	9.7	0.773	-0.371	5	11.4	-0.304897	10.55	1.142	0.192	5	10.4	1.194	0.256	5	10.4	0.22404	10.4	0.999	-0.001	5	4.6	0.992	-0.012	5	7.6	-0.00650678	6.1	4	FALSE	FALSE	TRUE	FALSE	1.051	0.072	5
Q9Y547	Intraflagellar transport protein 25 homolog OS=Homo sapiens GN=HSPB11 PE=1 SV=1 - [IFT25_HUMAN]	HSPB11	98.73	10.42	1	1	1	5	144	16.3	5.03	1.148	0.199	5	3.2	1.126	0.171	5	5.7	0.185232	4.45	0.893	-0.163	5	0.4	0.895	-0.16	5	5.7	-0.161653	3.05	1.009	0.013	5	1.3	0.966	-0.05	5	7.3	-0.0181473	4.3	0	FALSE	FALSE	TRUE	FALSE	0.968	-0.047	5
A0AVF1	Intraflagellar transport protein 56 OS=Homo sapiens GN=TTC26 PE=2 SV=1 - [IFT56_HUMAN]	TTC26	85.21	6.68	1	3	3	3	554	64.1	6.93	1.105	0.144	3	4.7	0.967	-0.048	3	11.7	0.051024	8.2	1.01	0.014	3	1	1.01	0.014	3	8.7	0.0143553	4.85	1.189	0.25	3	3.3	1.12	0.163	3	9.6	0.207268	6.45	0	FALSE	FALSE	TRUE	FALSE	1.075	0.104	3
Q8WYA0	Intraflagellar transport protein 81 homolog OS=Homo sapiens GN=IFT81 PE=1 SV=1 - [IFT81_HUMAN]	IFT81	171.94	12.87	1	9	9	9	676	79.7	8.82	1.04	0.057	9	15.9	1.018	0.026	9	11.9	0.041243	13.9	1.02	0.029	9	6.1	0.983	-0.025	9	15.9	0.00216242	11	1.104	0.143	9	9.7	0.947	-0.079	9	12.3	0.0363275	11	0	FALSE	FALSE	TRUE	FALSE	1.048	0.068	9
Q86WT1	Tetratricopeptide repeat protein 30A OS=Homo sapiens GN=TTC30A PE=2 SV=3 - [TT30A_HUMAN]	TTC30A	47.99	3.16	1	2	2	2	665	76.1	5.2	1.026	0.037	2	5.1	1.167	0.223	2	14.6	0.132906	9.85	0.958	-0.062	2	14.5	1.015	0.021	2	6.9	-0.019609	10.7	0.974	-0.038	2	19.6	1.178	0.236	2	7.7	0.105678	13.65		FALSE	FALSE	FALSE		0.945	-0.082	2
Q9NQC8	Intraflagellar transport protein 46 homolog OS=Homo sapiens GN=IFT46 PE=1 SV=1 - [IFT46_HUMAN]	IFT46	72.64	7.89	1	2	2	3	304	34.3	4.54	1.001	0.001	3	2.4	1.119	0.162	3	24.7	0.0840643	13.55	1.026	0.037	3	4.5	1.01	0.014	3	9.3	0.0257376	6.9	1.017	0.024	3	6.9	1.213	0.279	3	3.9	0.157044	5.4	0	FALSE	FALSE	TRUE	FALSE	0.863	-0.213	3
Q9BW83	Intraflagellar transport protein 27 homolog OS=Homo sapiens GN=IFT27 PE=1 SV=1 - [IFT27_HUMAN]	IFT27	914.52	58.6	1	10	10	30	186	20.5	5.41	0.946	-0.08	30	10.7	0.887	-0.173	30	15.6	-0.125793	13.15	1.213	0.279	30	8.8	1.288	0.365	30	15.1	0.322505	11.95	1.081	0.112	30	9.7	1.095	0.131	30	19.1	0.121679	14.4	1	FALSE	FALSE	TRUE	FALSE	0.976	-0.035	30
Q8TCX1	Cytoplasmic dynein 2 light intermediate chain 1 OS=Homo sapiens GN=DYNC2LI1 PE=1 SV=1 - [DC2L1_HUMAN]	DYNC2LI1	35.93	2.28	1	1	1	1	351	39.6	7.53	0.948	-0.077	1	NA	1.04	0.057	1	NA	-0.00868224	NA	1.163	0.218	1	NA	1.078	0.108	1	NA	0.164143	NA	1.092	0.127	1	NA	1.115	0.157	1	NA	0.142087	NA		FALSE	FALSE	FALSE		0.922	-0.117	1
Q9NP97	Dynein light chain roadblock-type 1 OS=Homo sapiens GN=DYNLRB1 PE=1 SV=3 - [DLRB1_HUMAN]	DYNLRB1	1060.93	88.54	2	9	9	36	96	10.9	7.25	0.926	-0.111	36	32.8	0.95	-0.074	36	37.5	-0.0923402	35.15	1.084	0.116	36	20.7	1.152	0.204	36	22.3	0.16092	21.5	1	0	36	18.6	1.102	0.14	36	17.2	0.0717627	17.9	0	FALSE	FALSE	TRUE	FALSE	0.979	-0.031	36
Q96FT9	Intraflagellar transport protein 43 homolog OS=Homo sapiens GN=IFT43 PE=1 SV=3 - [IFT43_HUMAN]	IFT43	70.59	11.06	1	2	2	2	208	23.5	4.75	1.067	0.094	2	18.1	0.879	-0.186	2	2.7	-0.0394883	10.4	0.996	-0.006	2	5	1.128	0.174	2	6.4	0.0867838	5.7	1.053	0.075	2	23.3	0.987	-0.019	2	3.7	0.0285692	13.5		FALSE	FALSE	FALSE		1.114	0.156	2
Q8IY31	Intraflagellar transport protein 20 homolog OS=Homo sapiens GN=IFT20 PE=1 SV=1 - [IFT20_HUMAN]	IFT20	152.38	23.48	1	2	2	4	132	15.3	5.12	1.011	0.016	4	23.5	1.04	0.057	4	20.1	0.0363275	21.8	0.865	-0.209	4	4.3	0.82	-0.286	4	5.3	-0.247251	4.8	0.842	-0.248	4	28	0.819	-0.288	4	3.7	-0.267948	15.85	0	FALSE	FALSE	TRUE	FALSE	0.952	-0.071	4
Q96AJ1	Clusterin-associated protein 1 OS=Homo sapiens GN=CLUAP1 PE=1 SV=4 - [CLUA1_HUMAN]	CLUAP1	112.35	7.26	1	2	2	3	413	48.1	4.77	0.931	-0.103	3	1.7	0.989	-0.016	3	20	-0.0588937	10.85	1	0	3	7.1	1.025	0.036	3	13.8	0.0179219	10.45	1.003	0.004	3	11.1	1.035	0.05	3	2.1	0.0271541	6.6	0	FALSE	FALSE	TRUE	FALSE	0.955	-0.066	3
Q96LB3	Intraflagellar transport protein 74 homolog OS=Homo sapiens GN=IFT74 PE=1 SV=1 - [IFT74_HUMAN]	IFT74	335.37	20.83	1	10	10	17	600	69.2	6	0.834	-0.262	17	12.2	0.878	-0.188	17	16.1	-0.224317	14.15	0.924	-0.114	17	8.5	0.988	-0.017	17	9.7	-0.0649175	9.1	0.757	-0.402	17	12.7	0.805	-0.313	17	21.8	-0.356606	17.25	4	FALSE	FALSE	TRUE	FALSE	0.933	-0.1	17
Q8WVS4	WD repeat-containing protein 60 OS=Homo sapiens GN=WDR60 PE=1 SV=3 - [WDR60_HUMAN]	WDR60	34.53	1.13	1	1	1	1	1066	122.5	7.31	0.898	-0.155	1	NA	1.044	0.062	1	NA	-0.0424568	NA	1.267	0.341	1	NA	0.996	-0.006	1	NA	0.178237	NA	1.128	0.174	1	NA	1.035	0.05	1	NA	0.113034	NA		FALSE	FALSE	FALSE		0.972	-0.041	1
Q8WW35	Tctex1 domain-containing protein 2 OS=Homo sapiens GN=TCTEX1D2 PE=1 SV=2 - [TC1D2_HUMAN]	TCTEX1D2	38.67	12.68	1	1	1	1	142	16.1	4.93	0.601	-0.735	1	NA	0.548	-0.868	1	NA	-0.799621	NA	1.075	0.104	1	NA	1.323	0.404	1	NA	0.261832	NA	0.64	-0.644	1	NA	0.721	-0.472	1	NA	-0.555333	NA		FALSE	FALSE	FALSE		0.959	-0.06	1
Q5SQI0	Alpha-tubulin N-acetyltransferase 1 OS=Homo sapiens GN=ATAT1 PE=1 SV=1 - [ATAT_HUMAN]	ATAT1	445	27.08	1	11	11	23	421	46.8	9.95	1.113	0.154	21	23.6	0.996	-0.006	21	32.6	0.0765591	28.1	1.607	0.684	21	21.1	1.608	0.685	21	35.9	0.684819	28.5	1.829	0.871	21	33.2	1.806	0.853	21	38.5	0.861955	35.85	2	FALSE	FALSE	TRUE	FALSE	1.048	0.068	21
Q9NXB0	Meckel syndrome type 1 protein OS=Homo sapiens GN=MKS1 PE=1 SV=2 - [MKS1_HUMAN]	MKS1	60.2	2.68	1	1	1	2	559	64.5	6.46	0.834	-0.262	2	4.8	0.797	-0.327	2	7.3	-0.294243	6.05	1.183	0.242	2	17.8	1.321	0.402	2	14.5	0.324235	16.15	0.978	-0.032	2	22.8	1.048	0.068	2	7.1	0.0186342	14.95		FALSE	FALSE	FALSE		1.059	0.083	2
Q68CZ1	Protein fantom OS=Homo sapiens GN=RPGRIP1L PE=1 SV=2 - [FTM_HUMAN]	RPGRIP1L	57.73	3.73	1	3	4	4	1315	151.1	5.35	0.783	-0.353	3	2.1	0.642	-0.639	3	23.5	-0.489038	12.8	0.888	-0.171	3	13.7	1.078	0.108	3	18	-0.0247367	15.85	0.689	-0.537	3	15.9	0.689	-0.537	3	5.4	-0.537424	10.65	4	FALSE	FALSE	TRUE	FALSE	0.972	-0.041	3
Q13099	Intraflagellar transport protein 88 homolog OS=Homo sapiens GN=IFT88 PE=2 SV=2 - [IFT88_HUMAN]	IFT88	126.17	6.48	1	3	3	4	833	94.2	6.54	0.812	-0.3	4	9.2	0.895	-0.16	4	12.6	-0.228537	10.9	1.12	0.163	4	10.8	1.184	0.244	4	8.8	0.204141	9.8	0.856	-0.224	4	18.1	1.028	0.04	4	6.9	-0.086201	12.5	0	FALSE	FALSE	TRUE	FALSE	0.948	-0.077	4
Q9Y366	Intraflagellar transport protein 52 homolog OS=Homo sapiens GN=IFT52 PE=1 SV=3 - [IFT52_HUMAN]	IFT52	47.9	9.61	1	3	3	3	437	49.7	5.26	1.181	0.24	3	58.3	1.117	0.16	3	19.7	0.200379	39	1.027	0.038	3	24.8	1.039	0.055	3	13.6	0.0468403	19.2	1.019	0.027	3	30.3	1.054	0.076	3	6	0.0517201	18.15	0	FALSE	FALSE	TRUE	FALSE	1.002	0.003	3
Q9P2L0	WD repeat-containing protein 35 OS=Homo sapiens GN=WDR35 PE=1 SV=3 - [WDR35_HUMAN]	WDR35	98.78	3.98	1	4	4	6	1181	133.5	6.38	1.386	0.471	6	23.9	1.209	0.274	6	30.8	0.375735	27.35	0.892	-0.165	6	9.9	0.994	-0.009	6	22.2	-0.0846703	16.05	1.167	0.223	6	28.6	1.228	0.296	6	12.2	0.260026	20.4	3	FALSE	FALSE	TRUE	FALSE	0.941	-0.088	6
Q9UG01	Intraflagellar transport protein 172 homolog OS=Homo sapiens GN=IFT172 PE=1 SV=2 - [IF172_HUMAN]	IFT172	86.46	3.2	1	4	4	4	1749	197.5	6.13	0.98	-0.029	4	12.6	1.01	0.014	4	18.3	-0.00723157	15.45	0.921	-0.119	4	10.8	1.026	0.037	4	8.5	-0.0387471	9.65	0.906	-0.142	4	7.3	1.009	0.013	4	15	-0.0626556	11.15	0	FALSE	FALSE	TRUE	FALSE	0.921	-0.119	4
Q9NWB7	Intraflagellar transport protein 57 homolog OS=Homo sapiens GN=IFT57 PE=1 SV=1 - [IFT57_HUMAN]	IFT57	191.75	21.45	1	6	6	6	429	49.1	4.98	0.848	-0.238	5	9.3	0.851	-0.233	5	34.8	-0.235314	22.05	0.974	-0.038	5	1.8	1.004	0.006	5	8.4	-0.0159576	5.1	0.828	-0.272	5	11.1	0.835	-0.26	5	1.2	-0.266212	6.15	0	FALSE	FALSE	TRUE	FALSE	0.946	-0.08	5
Q8NCM8	Cytoplasmic dynein 2 heavy chain 1 OS=Homo sapiens GN=DYNC2H1 PE=1 SV=4 - [DYHC2_HUMAN]	DYNC2H1	369.09	4.71	1	15	17	20	4307	492.3	6.54	1.057	0.08	18	13.1	1.054	0.076	18	17.6	0.0779266	15.35	0.99	-0.014	18	11.5	1.013	0.019	18	13.4	0.00216242	12.45	1.066	0.092	18	11.7	1.089	0.123	18	10.1	0.107688	10.9	0	FALSE	FALSE	TRUE	FALSE	0.997	-0.004	18
Q7Z4L5	Tetratricopeptide repeat protein 21B OS=Homo sapiens GN=TTC21B PE=1 SV=2 - [TT21B_HUMAN]	TTC21B	163.57	3.57	1	3	3	3	1316	150.8	6.96	0.916	-0.127	3	4.3	0.926	-0.111	3	29.7	-0.118727	17	1.107	0.147	3	7.8	1.085	0.118	3	5	0.132248	6.4	0.954	-0.068	3	5.9	0.966	-0.05	3	24.5	-0.0588937	15.2	0	FALSE	FALSE	TRUE	FALSE	0.969	-0.045	3
Q9HBG6	Intraflagellar transport protein 122 homolog OS=Homo sapiens GN=IFT122 PE=1 SV=2 - [IF122_HUMAN]	IFT122	91.61	3.87	1	4	4	4	1241	141.7	6.49	1.136	0.184	4	8.9	1.176	0.234	4	8.6	0.209141	8.75	1.043	0.061	4	16.5	1.088	0.122	4	12	0.0915306	14.25	1.201	0.264	4	13	1.324	0.405	4	6.5	0.336283	9.75	3	FALSE	FALSE	TRUE	FALSE	0.936	-0.095	4
Q96RY7	Intraflagellar transport protein 140 homolog OS=Homo sapiens GN=IFT140 PE=1 SV=1 - [IF140_HUMAN]	IFT140	261.56	8.14	1	11	11	13	1462	165.1	6.04	0.935	-0.097	13	14.4	0.867	-0.206	13	20.5	-0.150401	17.45	1.08	0.111	13	11.8	1.173	0.23	13	22.3	0.171847	17.05	1.027	0.038	13	23	1.023	0.033	13	15.9	0.0356239	19.45	0	FALSE	FALSE	TRUE	FALSE	0.989	-0.016	13
Q8NEZ3	WD repeat-containing protein 19 OS=Homo sapiens GN=WDR19 PE=1 SV=2 - [WDR19_HUMAN]	WDR19	136.77	5.66	1	7	7	8	1342	151.5	6.35	1.123	0.167	8	28.7	1.043	0.061	8	26.2	0.115033	27.45	1.016	0.023	8	17.1	1.055	0.077	8	16.3	0.0503276	16.7	1.207	0.271	8	20.9	1.085	0.118	8	19.7	0.196607	20.3	0	FALSE	FALSE	TRUE	FALSE	1.02	0.029	8
O15534	Period circadian protein homolog 1 OS=Homo sapiens GN=PER1 PE=1 SV=2 - [PER1_HUMAN]	PER1	0	0.47	1	1	1	1	1290	136.1	6.09	1.068	0.095	1	NA	0.925	-0.112	1	NA	-0.00505829	NA	0.895	-0.16	1	NA	1.05	0.07	1	NA	-0.0402298	NA	0.948	-0.077	1	NA	0.967	-0.048	1	NA	-0.0626556	NA		FALSE	FALSE	FALSE		1.015	0.021	1
Q7Z5J4	Retinoic acid-induced protein 1 OS=Homo sapiens GN=RAI1 PE=1 SV=2 - [RAI1_HUMAN]	RAI1	89.39	4.2	1	5	5	5	1906	203.2	8.79	0.956	-0.065	5	34.6	1.092	0.127	5	35	0.0342157	34.8	0.971	-0.042	5	43	0.961	-0.057	5	9.5	-0.0499049	26.25	1.058	0.081	5	20.7	0.984	-0.023	5	25.6	0.0299829	23.15	0	FALSE	FALSE	TRUE	FALSE	1.042	0.059	5
Q9BWF3	RNA-binding protein 4 OS=Homo sapiens GN=RBM4 PE=1 SV=1 - [RBM4_HUMAN]	RBM4	864.75	53.85	1	3	19	44	364	40.3	7.08	1.478	0.564	4	18.4	1.359	0.443	4	18.7	0.504366	18.55	1.019	0.027	4	25.8	1.175	0.233	4	18.6	0.133564	22.2	1.423	0.509	4	32.8	1.542	0.625	4	24.1	0.568032	28.45	3	FALSE	FALSE	TRUE	FALSE	1.008	0.011	4
P40926	Malate dehydrogenase, mitochondrial OS=Homo sapiens GN=MDH2 PE=1 SV=3 - [MDHM_HUMAN]	MDH2	6487.57	71.89	1	31	31	216	338	35.5	8.68	0.853	-0.229	214	29.9	0.922	-0.117	214	25.3	-0.172181	27.6	0.964	-0.053	214	21	1.062	0.087	214	15.6	0.0186342	18.3	0.854	-0.228	214	38.6	0.935	-0.097	214	25	-0.160847	31.8	0	FALSE	FALSE	TRUE	FALSE	0.974	-0.038	214
P36957	Dihydrolipoyllysine-residue succinyltransferase component of 2-oxoglutarate dehydrogenase complex, mitochondrial OS=Homo sapiens GN=DLST PE=1 SV=4 - [ODO2_HUMAN]	DLST	1323.97	31.79	1	15	15	58	453	48.7	8.95	0.927	-0.109	58	17.4	0.925	-0.112	58	18.6	-0.110916	18	1.049	0.069	58	13.5	0.999	-0.001	58	13.7	0.0342157	13.6	0.961	-0.057	58	22.8	0.895	-0.16	58	14.4	-0.107803	18.6	0	FALSE	FALSE	TRUE	FALSE	1.045	0.064	58
Q02218	2-oxoglutarate dehydrogenase, mitochondrial OS=Homo sapiens GN=OGDH PE=1 SV=3 - [ODO1_HUMAN]	OGDH	1333.27	27.86	4	19	23	51	1023	115.9	6.86	1.191	0.252	45	30.6	1.169	0.225	45	38.8	0.238787	34.7	0.931	-0.103	45	13.1	0.975	-0.037	45	24.9	-0.0694519	19	1.278	0.354	45	25.7	1.237	0.307	45	24.1	0.330558	24.9	3	FALSE	FALSE	TRUE	FALSE	1.019	0.027	45
Q99798	Aconitate hydratase, mitochondrial OS=Homo sapiens GN=ACO2 PE=1 SV=2 - [ACON_HUMAN]	ACO2	3037.11	55.77	1	38	38	123	780	85.4	7.61	0.927	-0.109	123	22	0.96	-0.059	123	27.8	-0.0839056	24.9	1.165	0.22	123	17.6	1.165	0.22	123	18	0.22033	17.8	1.081	0.112	123	25.7	1.122	0.166	123	23.7	0.139469	24.7	0	FALSE	FALSE	TRUE	FALSE	1.022	0.031	123
P51553	Isocitrate dehydrogenase [NAD] subunit gamma, mitochondrial OS=Homo sapiens GN=IDH3G PE=1 SV=1 - [IDH3G_HUMAN]	IDH3G	285.31	22.65	1	5	5	8	393	42.8	8.5	0.945	-0.082	8	5.3	1.095	0.131	8	6.7	0.0285692	6	1.006	0.009	8	7.3	0.943	-0.085	8	4.6	-0.0372659	5.95	0.893	-0.163	8	10.1	0.995	-0.007	8	5.6	-0.0831412	7.85	0	FALSE	FALSE	TRUE	FALSE	0.996	-0.006	8
O75390	Citrate synthase, mitochondrial OS=Homo sapiens GN=CS PE=1 SV=2 - [CISY_HUMAN]	CS	1462.34	31.97	1	17	17	80	466	51.7	8.32	1.083	0.115	80	15.4	1.13	0.176	80	21.5	0.146003	18.45	1.08	0.111	80	12.2	1.059	0.083	80	10.6	0.0969365	11.4	1.177	0.235	80	14	1.153	0.205	80	17.4	0.22033	15.7	0	FALSE	FALSE	TRUE	FALSE	1.021	0.03	80
P07954	Fumarate hydratase, mitochondrial OS=Homo sapiens GN=FH PE=1 SV=3 - [FUMH_HUMAN]	FH	2872.98	58.04	3	25	26	96	510	54.6	8.76	0.894	-0.162	95	20.7	0.905	-0.144	95	16.3	-0.152805	18.5	0.954	-0.068	95	12.7	0.942	-0.086	95	15	-0.077041	13.85	0.851	-0.233	95	15.3	0.882	-0.181	95	16.9	-0.206728	16.1	0	FALSE	FALSE	TRUE	FALSE	0.988	-0.017	95
Q13423	NAD(P) transhydrogenase, mitochondrial OS=Homo sapiens GN=NNT PE=1 SV=3 - [NNTM_HUMAN]	NNT	1489.26	36.92	1	32	32	64	1086	113.8	8.09	0.98	-0.029	64	12.4	1.046	0.065	64	18.5	0.0186342	15.45	1.241	0.312	64	13.5	1.061	0.085	64	18.2	0.202888	15.85	1.227	0.295	64	17.1	1.131	0.178	64	14.8	0.237564	15.95	0	FALSE	FALSE	TRUE	FALSE	1.045	0.064	64
Q16798	NADP-dependent malic enzyme, mitochondrial OS=Homo sapiens GN=ME3 PE=2 SV=2 - [MAON_HUMAN]	ME3	123.83	9.27	1	4	5	5	604	67	7.97	1.019	0.027	4	16.4	0.931	-0.103	4	9.8	-0.0365259	13.1	0.877	-0.189	4	7.2	0.973	-0.039	4	3.9	-0.112475	5.55	0.869	-0.203	4	6.3	0.925	-0.112	4	11.3	-0.15682	8.8	0	FALSE	FALSE	TRUE	FALSE	1.031	0.044	4
P23368	NAD-dependent malic enzyme, mitochondrial OS=Homo sapiens GN=ME2 PE=1 SV=1 - [MAOM_HUMAN]	ME2	2133.72	59.76	1	27	28	72	584	65.4	7.61	0.986	-0.02	71	28.8	1.005	0.007	71	26.2	-0.00650678	27.5	0.927	-0.109	71	18.3	0.914	-0.13	71	22.6	-0.11951	20.45	0.972	-0.041	71	18.1	0.968	-0.047	71	17.7	-0.0439433	17.9	0	FALSE	FALSE	TRUE	FALSE	0.992	-0.012	71
P53597	Succinate--CoA ligase [ADP/GDP-forming] subunit alpha, mitochondrial OS=Homo sapiens GN=SUCLG1 PE=1 SV=4 - [SUCA_HUMAN]	SUCLG1	706.28	35.84	1	13	13	40	346	36.2	8.79	0.897	-0.157	40	33	1.005	0.007	40	29.4	-0.0724828	31.2	1.048	0.068	40	15.5	1.005	0.007	40	18	0.0377336	16.75	0.937	-0.094	40	29.1	0.975	-0.037	40	20.1	-0.0649175	24.6	0	FALSE	FALSE	TRUE	FALSE	1.026	0.037	40
Q9P2R7	Succinate--CoA ligase [ADP-forming] subunit beta, mitochondrial OS=Homo sapiens GN=SUCLA2 PE=1 SV=3 - [SUCB1_HUMAN]	SUCLA2	1392.37	42.33	1	20	20	66	463	50.3	7.42	0.898	-0.155	66	16.2	1.011	0.016	66	18.5	-0.0671829	17.35	1.094	0.13	66	11.8	1.007	0.01	66	15.5	0.0710762	13.65	0.979	-0.031	66	19.8	1.056	0.079	66	18.5	0.0250288	19.15	0	FALSE	FALSE	TRUE	FALSE	0.986	-0.02	66
Q96I99	Succinate--CoA ligase [GDP-forming] subunit beta, mitochondrial OS=Homo sapiens GN=SUCLG2 PE=1 SV=2 - [SUCB2_HUMAN]	SUCLG2	873.33	41.44	1	18	18	31	432	46.5	6.39	0.9	-0.152	31	19.5	0.923	-0.116	31	14.9	-0.133685	17.2	0.932	-0.102	31	7.7	0.825	-0.278	31	12.8	-0.186886	10.25	0.812	-0.3	31	20.4	0.833	-0.264	31	22.8	-0.281912	21.6	0	FALSE	FALSE	TRUE	FALSE	1.015	0.021	31
Q6P587	Acylpyruvase FAHD1, mitochondrial OS=Homo sapiens GN=FAHD1 PE=1 SV=2 - [FAHD1_HUMAN]	FAHD1	855.16	54.46	1	10	10	27	224	24.8	7.39	0.833	-0.264	27	16.6	0.916	-0.127	27	14.2	-0.19347	15.4	1.061	0.085	27	14.9	1.021	0.03	27	11.7	0.0579701	13.3	0.89	-0.168	27	14.3	0.935	-0.097	27	29.6	-0.132104	21.95	0	FALSE	FALSE	TRUE	FALSE	0.991	-0.013	27
P50213	Isocitrate dehydrogenase [NAD] subunit alpha, mitochondrial OS=Homo sapiens GN=IDH3A PE=1 SV=1 - [IDH3A_HUMAN]	IDH3A	289.68	19.13	1	8	8	19	366	39.6	6.92	0.934	-0.099	19	23	0.923	-0.116	19	12.9	-0.107026	17.95	0.96	-0.059	19	14.8	0.94	-0.089	19	16.1	-0.0740006	15.45	0.873	-0.196	19	24	0.814	-0.297	19	12.9	-0.24554	18.45	0	FALSE	FALSE	TRUE	FALSE	1.056	0.079	19
O43837	Isocitrate dehydrogenase [NAD] subunit beta, mitochondrial OS=Homo sapiens GN=IDH3B PE=1 SV=2 - [IDH3B_HUMAN]	IDH3B	376.33	26.23	1	10	10	16	385	42.2	8.46	0.979	-0.031	16	28.1	1.066	0.092	16	28	0.0321008	28.05	1.005	0.007	16	15.4	0.882	-0.181	16	24.7	-0.0839056	20.05	0.997	-0.004	16	17.8	0.936	-0.095	16	9.9	-0.0491584	13.85	0	FALSE	FALSE	TRUE	FALSE	1.042	0.059	16
P48735	Isocitrate dehydrogenase [NADP], mitochondrial OS=Homo sapiens GN=IDH2 PE=1 SV=2 - [IDHP_HUMAN]	IDH2	2042.72	57.52	1	27	29	133	452	50.9	8.69	1.075	0.104	121	15.7	1.133	0.18	121	21.4	0.14274	18.55	1.112	0.153	121	18.5	1.058	0.081	121	16.4	0.117695	17.45	1.223	0.29	121	14.1	1.167	0.223	121	12.7	0.257011	13.4	0	FALSE	FALSE	TRUE	FALSE	1.004	0.006	121
Q96PU5	E3 ubiquitin-protein ligase NEDD4-like OS=Homo sapiens GN=NEDD4L PE=1 SV=2 - [NED4L_HUMAN]	NEDD4L	949.69	26.87	1	21	22	38	975	111.9	5.82	1.17	0.227	35	25.2	1.111	0.152	35	23.5	0.189666	24.35	1.72	0.782	35	30	1.731	0.792	35	45	0.787014	37.5	2.01	1.007	35	52	2.081	1.057	35	47.4	1.03245	49.7	2	FALSE	FALSE	TRUE	FALSE	1.046	0.065	35
O95714	E3 ubiquitin-protein ligase HERC2 OS=Homo sapiens GN=HERC2 PE=1 SV=2 - [HERC2_HUMAN]	HERC2	46.9	1.24	1	4	4	4	4834	526.9	6.28	1.007	0.01	4	10.2	0.97	-0.044	4	11.4	-0.0166871	10.8	1.196	0.258	4	10.6	1.247	0.318	4	14.1	0.288654	12.35	1.158	0.212	4	8.3	1.17	0.227	4	17.3	0.219091	12.8	0	FALSE	FALSE	TRUE	FALSE	1.065	0.091	4
Q9UNE7	E3 ubiquitin-protein ligase CHIP OS=Homo sapiens GN=STUB1 PE=1 SV=2 - [CHIP_HUMAN]	STUB1	954.88	58.75	1	19	19	42	303	34.8	5.87	0.887	-0.173	42	19.8	0.914	-0.13	42	20.9	-0.151202	20.35	0.984	-0.023	42	9.9	1.016	0.023	42	16	0	12.95	0.869	-0.203	42	14.6	0.913	-0.131	42	19.3	-0.166503	16.95	0	FALSE	FALSE	TRUE	FALSE	0.996	-0.006	42
Q9HAU4	E3 ubiquitin-protein ligase SMURF2 OS=Homo sapiens GN=SMURF2 PE=1 SV=1 - [SMUF2_HUMAN]	SMURF2	78.16	1.87	1	1	1	2	748	86.1	7.96	0.974	-0.038	2	12.1	0.785	-0.349	2	7.1	-0.185245	9.6	1.063	0.088	2	11.3	1.212	0.277	2	3.8	0.185867	7.55	1.026	0.037	2	0.9	0.946	-0.08	2	11	-0.0203404	5.95		FALSE	FALSE	FALSE		1.087	0.12	2
P07711	Cathepsin L1 OS=Homo sapiens GN=CTSL PE=1 SV=2 - [CATL1_HUMAN]	CTSL	255.5	14.11	4	4	4	9	333	37.5	5.45	1.031	0.044	9	33.4	1.028	0.04	9	19.8	0.0419438	26.6	0.928	-0.108	9	9.7	1.021	0.03	9	7.3	-0.0372659	8.5	0.883	-0.18	9	18.8	1.08	0.111	9	18.1	-0.0269398	18.45	0	FALSE	FALSE	TRUE	FALSE	0.999	-0.001	9
Q13049	E3 ubiquitin-protein ligase TRIM32 OS=Homo sapiens GN=TRIM32 PE=1 SV=2 - [TRI32_HUMAN]	TRIM32	189.82	8.58	1	6	6	7	653	71.9	6.98	0.861	-0.216	7	26.3	0.921	-0.119	7	20.4	-0.166503	23.35	1.01	0.014	7	14.2	1.043	0.061	7	10.4	0.0377336	12.3	0.857	-0.223	7	31.2	0.891	-0.167	7	14.3	-0.194295	22.75	0	FALSE	FALSE	TRUE	FALSE	1.034	0.048	7
Q15819	Ubiquitin-conjugating enzyme E2 variant 2 OS=Homo sapiens GN=UBE2V2 PE=1 SV=4 - [UB2V2_HUMAN]	UBE2V2	797.38	84.83	1	7	17	40	145	16.4	8.09	0.859	-0.219	12	42.4	0.848	-0.238	12	33.9	-0.228537	38.15	0.944	-0.083	12	7.6	1.102	0.14	12	8.4	0.0328061	8	0.788	-0.344	12	43.1	0.901	-0.15	12	39	-0.243831	41.05	0	FALSE	FALSE	TRUE	FALSE	0.949	-0.076	12
Q96J02	E3 ubiquitin-protein ligase Itchy homolog OS=Homo sapiens GN=ITCH PE=1 SV=2 - [ITCH_HUMAN]	ITCH	526.37	15.39	2	10	10	19	903	102.7	6.3	1.023	0.033	19	23.5	0.945	-0.082	19	26.5	-0.0232698	25	0.963	-0.054	19	14.5	1.036	0.051	19	16.4	-0.000721528	15.45	1.03	0.043	19	15.9	0.976	-0.035	19	15.7	0.00432161	15.8	0	FALSE	FALSE	TRUE	FALSE	1.02	0.029	19
Q9UBG0	C-type mannose receptor 2 OS=Homo sapiens GN=MRC2 PE=1 SV=2 - [MRC2_HUMAN]	MRC2	616.52	14.67	1	17	17	30	1479	166.6	5.83	1.445	0.531	30	22.3	1.578	0.658	30	31.9	0.595981	27.1	0.899	-0.154	30	25.5	0.811	-0.302	30	36.2	-0.226004	30.85	1.176	0.234	30	31.8	1.126	0.171	30	32	0.202888	31.9	3	FALSE	FALSE	TRUE	FALSE	1.014	0.02	30
Q9NQ86	E3 ubiquitin-protein ligase TRIM36 OS=Homo sapiens GN=TRIM36 PE=1 SV=2 - [TRI36_HUMAN]	TRIM36	614.49	25.96	1	14	14	23	728	83	6.11	1.12	0.163	23	28.8	1.142	0.192	23	37.6	0.177599	33.2	1.445	0.531	23	17.4	1.649	0.722	23	20.4	0.629473	18.9	1.71	0.774	23	29.6	1.834	0.875	23	36.2	0.825379	32.9	2	FALSE	FALSE	TRUE	FALSE	1.073	0.102	23
Q9BS18	Anaphase-promoting complex subunit 13 OS=Homo sapiens GN=ANAPC13 PE=1 SV=1 - [APC13_HUMAN]	ANAPC13	30.52	13.51	1	1	1	1	74	8.5	4.18	NA	NA	NA	NA	NA	NA	NA	NA	NA	NA	NA	NA	NA	NA	NA	NA	NA	NA	NA	NA	NA	NA	NA	NA	NA	NA	NA	NA	NA	NA		TRUE	FALSE			NA	NA	NA
Q7Z6E9	E3 ubiquitin-protein ligase RBBP6 OS=Homo sapiens GN=RBBP6 PE=1 SV=1 - [RBBP6_HUMAN]	RBBP6	497.33	8.2	1	13	13	16	1792	201.4	9.64	0.857	-0.223	16	24.1	0.942	-0.086	16	17.9	-0.152805	21	0.984	-0.023	16	18.5	0.921	-0.119	16	12.7	-0.070209	15.6	0.875	-0.193	16	23.2	0.867	-0.206	16	29.4	-0.199255	26.3	0	FALSE	FALSE	TRUE	FALSE	0.979	-0.031	16
Q86Y13	E3 ubiquitin-protein ligase DZIP3 OS=Homo sapiens GN=DZIP3 PE=1 SV=2 - [DZIP3_HUMAN]	DZIP3	51.06	2.4	1	2	3	3	1208	138.5	6.87	1.176	0.234	2	9.4	1.306	0.385	2	8.1	0.311503	8.75	0.938	-0.092	2	15.4	0.759	-0.398	2	31.7	-0.237013	23.55	1.094	0.13	2	25	0.986	-0.02	2	23.1	0.0565835	24.05		FALSE	FALSE	FALSE		1.12	0.163	2
Q5VTB9	E3 ubiquitin-protein ligase RNF220 OS=Homo sapiens GN=RNF220 PE=1 SV=1 - [RN220_HUMAN]	RNF220	83.93	5.3	1	2	2	3	566	62.7	6.04	0.952	-0.071	3	19.9	0.696	-0.523	3	0.3	-0.279284	10.1	1.033	0.047	3	3.6	1.353	0.436	3	14.3	0.254594	8.95	1.069	0.096	3	2.5	1.028	0.04	3	10	0.0683269	6.25	0	FALSE	FALSE	TRUE	FALSE	1.007	0.01	3
Q8NG27	E3 ubiquitin-protein ligase Praja-1 OS=Homo sapiens GN=PJA1 PE=1 SV=2 - [PJA1_HUMAN]	PJA1	67.63	7.93	1	3	3	4	643	71	5.17	0.856	-0.224	4	13.9	0.779	-0.36	4	15.2	-0.290709	14.55	1.318	0.398	4	6.5	1.547	0.629	4	11.4	0.518535	8.95	1.174	0.231	4	6.1	1.194	0.256	4	12	0.243669	9.05	1	FALSE	FALSE	TRUE	FALSE	0.966	-0.05	4
Q92990	Glomulin OS=Homo sapiens GN=GLMN PE=1 SV=2 - [GLMN_HUMAN]	GLMN	517.6	24.58	1	10	10	23	594	68.2	5.33	0.812	-0.3	23	10	0.836	-0.258	23	8.1	-0.279284	9.05	0.93	-0.105	23	9.6	0.984	-0.023	23	11.7	-0.0634092	10.65	0.752	-0.411	23	12.7	0.845	-0.243	23	10.7	-0.324636	11.7	4	FALSE	FALSE	TRUE	FALSE	0.913	-0.131	23
Q9C026	E3 ubiquitin-protein ligase TRIM9 OS=Homo sapiens GN=TRIM9 PE=1 SV=1 - [TRIM9_HUMAN]	TRIM9	193.1	9.01	1	6	6	8	710	79.1	6.84	0.911	-0.134	8	17.2	0.97	-0.044	8	14.5	-0.0885002	15.85	0.924	-0.114	8	8.8	0.908	-0.139	8	17.4	-0.12658	13.1	0.834	-0.262	8	9.1	0.872	-0.198	8	19.2	-0.229382	14.15	0	FALSE	FALSE	TRUE	FALSE	0.93	-0.105	8
Q6UWE0	E3 ubiquitin-protein ligase LRSAM1 OS=Homo sapiens GN=LRSAM1 PE=1 SV=1 - [LRSM1_HUMAN]	LRSAM1	474.55	17.15	1	9	9	18	723	83.5	5.94	0.929	-0.106	18	24	0.927	-0.109	18	17.4	-0.107803	20.7	1.272	0.347	18	19.8	1.339	0.421	18	15.4	0.384602	17.6	1.116	0.158	18	11.9	1.212	0.277	18	6.1	0.219091	9	1	FALSE	FALSE	TRUE	FALSE	1.002	0.003	18
Q9C037	E3 ubiquitin-protein ligase TRIM4 OS=Homo sapiens GN=TRIM4 PE=1 SV=2 - [TRIM4_HUMAN]	TRIM4	32.79	2	1	1	1	2	500	57.4	8.1	0.74	-0.434	2	3.1	0.628	-0.671	2	16.3	-0.547932	9.7	1.109	0.149	2	2.8	1.321	0.402	2	6.8	0.280956	4.8	0.814	-0.297	2	6	0.825	-0.278	2	9.4	-0.287184	7.7		FALSE	FALSE	FALSE		1.044	0.062	2
O94874	E3 UFM1-protein ligase 1 OS=Homo sapiens GN=UFL1 PE=1 SV=2 - [UFL1_HUMAN]	UFL1	578.75	24.06	1	18	18	29	794	89.5	6.79	1.035	0.05	29	15.6	1.072	0.1	29	25.3	0.0751903	20.45	0.91	-0.136	29	14.5	0.908	-0.139	29	13.2	-0.137648	13.85	0.984	-0.023	29	15.1	0.967	-0.048	29	18.8	-0.0357862	16.95	0	FALSE	FALSE	TRUE	FALSE	1.017	0.024	29
Q15751	Probable E3 ubiquitin-protein ligase HERC1 OS=Homo sapiens GN=HERC1 PE=1 SV=2 - [HERC1_HUMAN]	HERC1	71.75	2.08	1	10	10	11	4861	531.9	6.04	1.045	0.064	11	14.6	1.04	0.057	11	21.1	0.0600474	17.85	1.107	0.147	11	13.5	1.158	0.212	11	12.5	0.179511	13	1.265	0.339	11	28.1	1.176	0.234	11	23.1	0.287472	25.6	0	FALSE	FALSE	TRUE	FALSE	0.991	-0.013	11
Q86XS8	E3 ubiquitin-protein ligase RNF130 OS=Homo sapiens GN=RNF130 PE=1 SV=1 - [GOLI_HUMAN]	RNF130	49.82	5.49	1	1	1	1	419	46.4	8.87	0.726	-0.462	1	NA	0.845	-0.243	1	NA	-0.348317	NA	1.159	0.213	1	NA	1.013	0.019	1	NA	0.119024	NA	0.834	-0.262	1	NA	0.852	-0.231	1	NA	-0.246395	NA		FALSE	FALSE	FALSE		1.117	0.16	1
Q8NHG8	E3 ubiquitin-protein ligase ZNRF2 OS=Homo sapiens GN=ZNRF2 PE=1 SV=1 - [ZNRF2_HUMAN]	ZNRF2	64.53	4.13	1	1	1	1	242	24.1	7.09	0.793	-0.335	1	NA	0.874	-0.194	1	NA	-0.262746	NA	1.114	0.156	1	NA	1.177	0.235	1	NA	0.195977	NA	0.876	-0.191	1	NA	1.023	0.033	1	NA	-0.0747601	NA		FALSE	FALSE	FALSE		1.017	0.024	1
O94972	E3 ubiquitin-protein ligase TRIM37 OS=Homo sapiens GN=TRIM37 PE=1 SV=2 - [TRI37_HUMAN]	TRIM37	27.99	3.53	1	2	3	3	964	107.8	5.15	1.029	0.041	2	7.3	0.935	-0.097	2	1.2	-0.0262051	4.25	0.969	-0.045	2	9	1.009	0.013	2	10.4	-0.0159576	9.7	0.989	-0.016	2	1.6	0.938	-0.092	2	9.2	-0.0536434	5.4		FALSE	FALSE	FALSE		1.069	0.096	2
O94822	E3 ubiquitin-protein ligase listerin OS=Homo sapiens GN=LTN1 PE=1 SV=6 - [LTN1_HUMAN]	LTN1	194.61	6.68	1	9	10	15	1766	200.4	6.25	1.009	0.013	11	22.5	1.075	0.104	11	27.8	0.0593553	25.15	0.951	-0.072	11	18.9	0.969	-0.045	11	10.4	-0.0588937	14.65	1.038	0.054	11	12	1.187	0.247	11	17.9	0.153805	14.95	0	FALSE	FALSE	TRUE	FALSE	0.955	-0.066	11
Q9Y385	Ubiquitin-conjugating enzyme E2 J1 OS=Homo sapiens GN=UBE2J1 PE=1 SV=2 - [UB2J1_HUMAN]	UBE2J1	123.76	11.01	1	3	3	4	318	35.2	6.74	0.932	-0.102	4	4.8	1.071	0.099	4	10.4	0.00216242	7.6	0.984	-0.023	4	7.3	0.713	-0.488	4	13.6	-0.237013	10.45	0.91	-0.136	4	12.2	0.79	-0.34	4	4.6	-0.234465	8.4		FALSE	FALSE	TRUE	TRUE	1.079	0.11	4
Q5GLZ8	Probable E3 ubiquitin-protein ligase HERC4 OS=Homo sapiens GN=HERC4 PE=1 SV=1 - [HERC4_HUMAN]	HERC4	458.35	21.29	1	17	17	21	1057	118.5	6.19	1.061	0.085	21	19.5	1.257	0.33	21	29.5	0.212881	24.5	1.018	0.026	21	19.2	1.083	0.115	21	24.5	0.0710762	21.85	1.06	0.084	21	17	1.258	0.331	21	14.3	0.212881	15.65	0	FALSE	FALSE	TRUE	FALSE	0.935	-0.097	21
Q9Y4B6	Protein VPRBP OS=Homo sapiens GN=VPRBP PE=1 SV=3 - [VPRBP_HUMAN]	VPRBP	146.98	5.97	1	9	9	10	1507	168.9	5.06	1.124	0.169	10	24.9	1.116	0.158	10	33.2	0.163499	29.05	0.962	-0.056	10	14.3	1.006	0.009	10	16.6	-0.0232698	15.45	1.126	0.171	10	17.1	1.157	0.21	10	6.4	0.190931	11.75	0	FALSE	FALSE	TRUE	FALSE	0.975	-0.037	10
Q7Z6J0	E3 ubiquitin-protein ligase SH3RF1 OS=Homo sapiens GN=SH3RF1 PE=1 SV=2 - [SH3R1_HUMAN]	SH3RF1	267.11	13.74	1	10	10	13	888	93.1	8.54	0.947	-0.079	13	23.2	0.905	-0.144	13	19.3	-0.110916	21.25	0.981	-0.028	13	17.2	0.983	-0.025	13	19.4	-0.0262051	18.3	0.876	-0.191	13	11	0.873	-0.196	13	15.4	-0.19347	13.2	0	FALSE	FALSE	TRUE	FALSE	1.015	0.021	13
Q9BSL1	Ubiquitin-associated domain-containing protein 1 OS=Homo sapiens GN=UBAC1 PE=1 SV=1 - [UBAC1_HUMAN]	UBAC1	738.24	29.38	1	10	10	25	405	45.3	4.92	0.95	-0.074	25	20.1	0.939	-0.091	25	17.3	-0.0823773	18.7	0.96	-0.059	25	10.5	1.045	0.064	25	19	0.00360224	14.75	0.884	-0.178	25	26.5	0.962	-0.056	25	20.6	-0.115597	23.55	0	FALSE	FALSE	TRUE	FALSE	0.97	-0.044	25
O43164	E3 ubiquitin-protein ligase Praja-2 OS=Homo sapiens GN=PJA2 PE=1 SV=4 - [PJA2_HUMAN]	PJA2	422.91	17.66	1	7	7	12	708	78.2	4.39	1.112	0.153	12	35.7	1.18	0.239	12	45.4	0.196607	40.55	0.805	-0.313	12	17.2	0.827	-0.274	12	19.9	-0.293359	18.55	0.971	-0.042	12	12.7	1.005	0.007	12	25	-0.0174171	18.85	0	FALSE	FALSE	TRUE	FALSE	1.051	0.072	12
Q8IYU2	E3 ubiquitin-protein ligase HACE1 OS=Homo sapiens GN=HACE1 PE=1 SV=2 - [HACE1_HUMAN]	HACE1	0	0.66	1	1	1	1	909	102.3	5.92	1.331	0.413	1	NA	1.313	0.393	1	NA	0.402722	NA	1.161	0.215	1	NA	1.326	0.407	1	NA	0.314407	NA	1.532	0.615	1	NA	1.732	0.792	1	NA	0.706641	NA		FALSE	FALSE	FALSE		0.818	-0.29	1
Q8ND25	E3 ubiquitin-protein ligase ZNRF1 OS=Homo sapiens GN=ZNRF1 PE=1 SV=2 - [ZNRF1_HUMAN]	ZNRF1	36.34	10.13	1	2	2	2	227	23.8	6.67	0.977	-0.034	2	6.1	0.938	-0.092	2	35.4	-0.0626556	20.75	1.457	0.543	2	41.6	1.526	0.61	2	75.1	0.576764	58.35	1.41	0.496	2	34.9	1.425	0.511	2	33.4	0.503349	34.15		FALSE	FALSE	FALSE		1.323	0.404	2
P52888	Thimet oligopeptidase OS=Homo sapiens GN=THOP1 PE=1 SV=2 - [THOP1_HUMAN]	THOP1	709.8	35.12	1	29	29	45	689	78.8	6.05	1.025	0.036	45	16.2	1.043	0.061	45	23.1	0.0482362	19.65	0.954	-0.068	45	20	0.952	-0.071	45	18.4	-0.0694519	19.2	0.898	-0.155	45	17.4	0.941	-0.088	45	23.4	-0.121079	20.4	0	FALSE	FALSE	TRUE	FALSE	0.96	-0.059	45
Q96LR5	Ubiquitin-conjugating enzyme E2 E2 OS=Homo sapiens GN=UBE2E2 PE=1 SV=1 - [UB2E2_HUMAN]	UBE2E2	91.51	18.41	2	1	3	3	201	22.2	7.71	0.975	-0.037	1	NA	0.782	-0.355	1	NA	-0.186886	NA	1.103	0.141	1	NA	1.264	0.338	1	NA	0.24306	NA	1.066	0.092	1	NA	0.983	-0.025	1	NA	0.03492	NA		FALSE	FALSE	FALSE		0.978	-0.032	1
Q9ULT8	E3 ubiquitin-protein ligase HECTD1 OS=Homo sapiens GN=HECTD1 PE=1 SV=3 - [HECD1_HUMAN]	HECTD1	1409.91	18.62	1	41	41	71	2610	289.2	5.35	0.987	-0.019	70	17.6	0.919	-0.122	70	11.9	-0.0694519	14.75	0.931	-0.103	70	13.6	0.995	-0.007	70	14.1	-0.0543923	13.85	0.915	-0.128	70	18.4	0.951	-0.072	70	18.2	-0.100051	18.3	0	FALSE	FALSE	TRUE	FALSE	0.992	-0.012	70
Q63HN8	E3 ubiquitin-protein ligase RNF213 OS=Homo sapiens GN=RNF213 PE=1 SV=3 - [RN213_HUMAN]	RNF213	210.35	2.4	1	8	9	11	5207	591	6.48	1.096	0.132	10	24.8	0.905	-0.144	10	14.7	0.000721167	19.75	0.995	-0.007	10	12.1	1.141	0.19	10	15.3	0.0949116	13.7	1.053	0.075	10	10.1	1.045	0.064	10	13.8	0.0690147	11.95	0	FALSE	FALSE	TRUE	FALSE	0.993	-0.01	10
Q8WV44	E3 ubiquitin-protein ligase TRIM41 OS=Homo sapiens GN=TRIM41 PE=1 SV=3 - [TRI41_HUMAN]	TRIM41	114.86	4.6	1	2	2	3	630	71.6	5.06	1.162	0.217	3	1.3	1.141	0.19	3	4.4	0.203514	2.85	1.112	0.153	3	9.7	1.386	0.471	3	5.5	0.320773	7.6	1.211	0.276	3	8.3	1.17	0.227	3	42.7	0.251568	25.5	1	FALSE	FALSE	TRUE	FALSE	1.035	0.05	3
P29144	Tripeptidyl-peptidase 2 OS=Homo sapiens GN=TPP2 PE=1 SV=4 - [TPP2_HUMAN]	TPP2	2641.37	43.8	1	53	53	105	1249	138.3	6.32	1.051	0.072	104	27.6	1.059	0.083	104	21.7	0.077243	24.65	0.92	-0.12	104	17.9	0.974	-0.038	104	14.2	-0.0785637	16.05	0.948	-0.077	104	18.8	1.019	0.027	104	21.3	-0.024003	20.05	0	FALSE	FALSE	TRUE	FALSE	0.975	-0.037	104
Q7L5Y6	DET1 homolog OS=Homo sapiens GN=DET1 PE=1 SV=2 - [DET1_HUMAN]	DET1	29.67	1.82	1	1	1	1	550	63.8	7.56	0.783	-0.353	1	NA	0.742	-0.431	1	NA	-0.391191	NA	1.292	0.37	1	NA	1.33	0.411	1	NA	0.390668	NA	1.002	0.003	1	NA	0.982	-0.026	1	NA	-0.011588	NA		FALSE	FALSE	FALSE		1.023	0.033	1
Q5U5Q3	RNA-binding E3 ubiquitin-protein ligase MEX3C OS=Homo sapiens GN=MEX3C PE=1 SV=3 - [MEX3C_HUMAN]	MEX3C	77.78	5.16	2	2	3	4	659	69.3	5	1.063	0.088	2	19.5	0.984	-0.023	2	4.7	0.0335111	12.1	1.027	0.038	2	10	0.824	-0.279	2	30.1	-0.111695	20.05	1.082	0.114	2	29.9	0.806	-0.311	2	25.1	-0.0831412	27.5		FALSE	FALSE	FALSE		1.125	0.17	2
P55786	Puromycin-sensitive aminopeptidase OS=Homo sapiens GN=NPEPPS PE=1 SV=2 - [PSA_HUMAN]	NPEPPS	3492.15	52.01	2	43	43	153	919	103.2	5.72	1.094	0.13	153	27.9	1.104	0.143	153	28.7	0.136191	28.3	1.095	0.131	153	16.5	1.191	0.252	153	14.2	0.192825	15.35	1.209	0.274	153	19.1	1.35	0.433	153	22.9	0.35558	21	1	FALSE	FALSE	TRUE	FALSE	0.938	-0.092	153
Q13867	Bleomycin hydrolase OS=Homo sapiens GN=BLMH PE=1 SV=1 - [BLMH_HUMAN]	BLMH	1182.71	51.65	1	22	22	60	455	52.5	6.27	1.021	0.03	60	26.7	1.089	0.123	60	26	0.077243	26.35	0.979	-0.031	60	16.4	1.096	0.132	60	16.7	0.0531113	16.55	1.025	0.036	60	21	1.157	0.21	60	16.2	0.125651	18.6	0	FALSE	FALSE	TRUE	FALSE	0.919	-0.122	60
Q9C0C9	(E3-independent) E2 ubiquitin-conjugating enzyme OS=Homo sapiens GN=UBE2O PE=1 SV=3 - [UBE2O_HUMAN]	UBE2O	753.35	20.98	1	25	25	38	1292	141.2	5.12	0.945	-0.082	38	14.7	0.91	-0.136	38	26.6	-0.108581	20.65	1.162	0.217	38	12.3	1.274	0.349	38	13.5	0.284514	12.9	1.124	0.169	38	13.7	1.137	0.185	38	19.7	0.176961	16.7	0	FALSE	FALSE	TRUE	FALSE	0.995	-0.007	38
O60291	E3 ubiquitin-protein ligase MGRN1 OS=Homo sapiens GN=MGRN1 PE=1 SV=2 - [MGRN1_HUMAN]	MGRN1	0	2.54	2	1	2	3	552	60.7	5.15	1.101	0.139	2	8.5	0.985	-0.022	2	13.5	0.0607392	11	1.139	0.188	2	2.1	1.358	0.441	2	3.9	0.320196	3	1.243	0.314	2	6.4	1.33	0.411	2	17.5	0.363451	11.95		FALSE	FALSE	FALSE		1.015	0.021	2
Q9GZZ9	Ubiquitin-like modifier-activating enzyme 5 OS=Homo sapiens GN=UBA5 PE=1 SV=1 - [UBA5_HUMAN]	UBA5	454.1	28.71	1	9	9	18	404	44.8	4.84	0.947	-0.079	18	23.5	1.017	0.024	18	27.6	-0.0262051	25.55	1.145	0.195	18	13.3	1.069	0.096	18	14.4	0.146655	13.85	1.063	0.088	18	24.4	1.139	0.188	18	27.5	0.138814	25.95	0	FALSE	FALSE	TRUE	FALSE	0.944	-0.083	18
Q96BH1	E3 ubiquitin-protein ligase RNF25 OS=Homo sapiens GN=RNF25 PE=1 SV=1 - [RNF25_HUMAN]	RNF25	75.78	3.92	1	2	2	3	459	51.2	6.54	0.854	-0.228	3	5.8	0.896	-0.158	3	21.3	-0.192645	13.55	0.928	-0.108	3	12.4	0.971	-0.042	3	18.9	-0.0747601	15.65	0.821	-0.285	3	6.6	0.866	-0.208	3	2.4	-0.24554	4.5	0	FALSE	FALSE	TRUE	FALSE	0.988	-0.017	3
Q7Z7E8	Ubiquitin-conjugating enzyme E2 Q1 OS=Homo sapiens GN=UBE2Q1 PE=1 SV=1 - [UB2Q1_HUMAN]	UBE2Q1	70.75	11.14	1	3	5	6	422	46.1	5.1	0.859	-0.219	4	17.8	0.841	-0.25	4	9.9	-0.234465	13.85	1.207	0.271	4	30.6	1.243	0.314	4	22.1	0.292782	26.35	0.989	-0.016	4	7.9	1.127	0.172	4	2.7	0.0813396	5.3	0	FALSE	FALSE	TRUE	FALSE	0.976	-0.035	4
Q9Y508	E3 ubiquitin-protein ligase RNF114 OS=Homo sapiens GN=RNF114 PE=1 SV=1 - [RN114_HUMAN]	RNF114	417.61	49.12	1	9	9	17	228	25.7	7.25	0.896	-0.158	17	22.2	0.878	-0.188	17	29.3	-0.172994	25.75	0.85	-0.234	17	19.7	0.916	-0.127	17	23.4	-0.179515	21.55	0.797	-0.327	17	25.8	0.771	-0.375	17	29.7	-0.351074	27.75	5	FALSE	FALSE	TRUE	FALSE	0.98	-0.029	17
Q14669	E3 ubiquitin-protein ligase TRIP12 OS=Homo sapiens GN=TRIP12 PE=1 SV=1 - [TRIPC_HUMAN]	TRIP12	986.06	17.87	2	25	26	54	1992	220.3	8.48	1.1	0.138	41	22.8	1.157	0.21	41	19.1	0.174406	20.95	0.961	-0.057	41	11.8	0.947	-0.079	41	16.9	-0.0679388	14.35	1.065	0.091	41	16.4	1.047	0.066	41	19.1	0.0786098	17.75	0	FALSE	FALSE	TRUE	FALSE	0.99	-0.014	41
Q9NVW2	E3 ubiquitin-protein ligase RLIM OS=Homo sapiens GN=RLIM PE=1 SV=3 - [RNF12_HUMAN]	RLIM	64.63	1.92	1	1	1	1	624	68.5	7.56	1.267	0.341	1	NA	1.505	0.59	1	NA	0.470927	NA	0.988	-0.017	1	NA	0.659	-0.602	1	NA	-0.280159	NA	1.24	0.31	1	NA	0.986	-0.02	1	NA	0.154454	NA		FALSE	FALSE	FALSE		0.944	-0.083	1
Q8WVD3	E3 ubiquitin-protein ligase RNF138 OS=Homo sapiens GN=RNF138 PE=1 SV=1 - [RN138_HUMAN]	RNF138	45.95	7.76	1	2	2	2	245	28.2	6.93	0.939	-0.091	2	23.3	0.775	-0.368	2	52.4	-0.222633	37.85	0.773	-0.371	2	41.2	0.929	-0.106	2	37.7	-0.232769	39.45	0.72	-0.474	2	16.7	0.717	-0.48	2	12.9	-0.47694	14.8		FALSE	FALSE	FALSE		0.912	-0.133	2
Q2Q1W2	E3 ubiquitin-protein ligase TRIM71 OS=Homo sapiens GN=TRIM71 PE=1 SV=1 - [LIN41_HUMAN]	TRIM71	35.51	1.5	1	1	1	1	868	93.3	7.61	1.36	0.444	1	NA	1.31	0.39	1	NA	0.41684	NA	0.695	-0.525	1	NA	0.741	-0.432	1	NA	-0.477944	NA	0.937	-0.094	1	NA	0.966	-0.05	1	NA	-0.0717244	NA		FALSE	FALSE	FALSE		1.006	0.009	1
Q5T447	E3 ubiquitin-protein ligase HECTD3 OS=Homo sapiens GN=HECTD3 PE=1 SV=1 - [HECD3_HUMAN]	HECTD3	200.23	7.08	1	5	5	8	861	97.1	5.64	1.255	0.328	8	9.6	1.113	0.154	8	25.2	0.243669	17.4	0.954	-0.068	8	6.5	1.057	0.08	8	13.6	0.00791308	10.05	1.136	0.184	8	12.2	1.206	0.27	8	9.2	0.227741	10.7	0	FALSE	FALSE	TRUE	FALSE	0.933	-0.1	8
Q15386	Ubiquitin-protein ligase E3C OS=Homo sapiens GN=UBE3C PE=1 SV=3 - [UBE3C_HUMAN]	UBE3C	78.02	2.59	1	3	3	4	1083	123.8	6.71	1.05	0.07	4	9.5	1.004	0.006	4	9.8	0.0384362	9.65	1.144	0.194	4	2.5	1.142	0.192	4	10.6	0.192825	6.55	1.17	0.227	4	7.1	1.101	0.139	4	15.9	0.183328	11.5	0	FALSE	FALSE	TRUE	FALSE	1.125	0.17	4
Q05086	Ubiquitin-protein ligase E3A OS=Homo sapiens GN=UBE3A PE=1 SV=4 - [UBE3A_HUMAN]	UBE3A	1411.16	28.11	1	20	20	46	875	100.6	5.22	1.032	0.045	46	15.9	1	0	46	26.4	0.0229004	21.15	0.993	-0.01	46	18.3	1.045	0.064	46	21.6	0.0271541	19.95	0.986	-0.02	46	12.5	1.036	0.051	46	16.6	0.015783	14.55	0	FALSE	FALSE	TRUE	FALSE	0.971	-0.042	46
Q8IWV8	E3 ubiquitin-protein ligase UBR2 OS=Homo sapiens GN=UBR2 PE=1 SV=1 - [UBR2_HUMAN]	UBR2	64.64	3.42	1	4	4	5	1755	200.4	6.24	1.119	0.162	5	7	1.094	0.13	5	9.3	0.146003	8.15	0.971	-0.042	5	7.1	0.983	-0.025	5	8.1	-0.0335695	7.6	1.085	0.118	5	15.7	1.069	0.096	5	7.4	0.107018	11.55	0	FALSE	FALSE	TRUE	FALSE	1.071	0.099	5
Q6Q0C0	E3 ubiquitin-protein ligase TRAF7 OS=Homo sapiens GN=TRAF7 PE=1 SV=1 - [TRAF7_HUMAN]	TRAF7	59.38	5.82	1	3	3	3	670	74.6	7.15	0.829	-0.271	3	14.6	0.831	-0.267	3	36.1	-0.268817	25.35	1.211	0.276	3	9.1	1.183	0.242	3	9.7	0.259423	9.4	1.058	0.081	3	23.9	0.93	-0.105	3	2.2	-0.00868224	13.05	0	FALSE	FALSE	TRUE	FALSE	0.977	-0.034	3
Q14139	Ubiquitin conjugation factor E4 A OS=Homo sapiens GN=UBE4A PE=1 SV=2 - [UBE4A_HUMAN]	UBE4A	386.23	13.98	1	12	12	17	1066	122.5	5.24	1.21	0.275	17	13.3	1.203	0.267	17	16.6	0.270828	14.95	1.027	0.038	17	13.5	1.108	0.148	17	11.9	0.0942361	12.7	1.192	0.253	17	14.1	1.285	0.362	17	14.2	0.308594	14.15	3	FALSE	FALSE	TRUE	FALSE	0.982	-0.026	17
Q9UBS8	E3 ubiquitin-protein ligase RNF14 OS=Homo sapiens GN=RNF14 PE=1 SV=1 - [RNF14_HUMAN]	RNF14	75.62	9.49	1	5	5	5	474	53.8	4.75	1.028	0.04	5	24.5	1.178	0.236	5	7	0.141433	15.75	0.901	-0.15	5	15.8	0.793	-0.335	5	8.2	-0.239566	12	1.021	0.03	5	49.5	0.938	-0.092	5	8.1	-0.0298826	28.8	0	FALSE	FALSE	TRUE	FALSE	0.988	-0.017	5
O95376	E3 ubiquitin-protein ligase ARIH2 OS=Homo sapiens GN=ARIH2 PE=1 SV=1 - [ARI2_HUMAN]	ARIH2	243.74	15.42	1	7	7	9	493	57.8	5.63	1.033	0.047	9	25.3	0.824	-0.279	9	19.5	-0.107026	22.4	1.09	0.124	9	4.7	1.235	0.305	9	11	0.217231	7.85	1.129	0.175	9	9.9	1.024	0.034	9	3.6	0.106348	6.75	0	FALSE	FALSE	TRUE	FALSE	1.101	0.139	9
Q8IWV7	E3 ubiquitin-protein ligase UBR1 OS=Homo sapiens GN=UBR1 PE=1 SV=1 - [UBR1_HUMAN]	UBR1	233.87	5.77	1	7	7	9	1749	200.1	6.01	1.065	0.091	9	24.3	1.048	0.068	9	32.6	0.0792928	28.45	1.201	0.264	9	7.7	1.16	0.214	9	14.6	0.239398	11.15	1.268	0.343	9	3.7	1.17	0.227	9	27.1	0.285698	15.4	0	FALSE	FALSE	TRUE	FALSE	1.032	0.045	9
Q7Z6Z7	E3 ubiquitin-protein ligase HUWE1 OS=Homo sapiens GN=HUWE1 PE=1 SV=3 - [HUWE1_HUMAN]	HUWE1	4324.29	24.21	1	94	94	165	4374	481.6	5.22	1.243	0.314	164	25.3	1.191	0.252	164	28.3	0.283329	26.8	1.069	0.096	164	17.5	1.17	0.227	164	20.7	0.162855	19.1	1.33	0.411	164	22.1	1.328	0.409	164	25.1	0.410341	23.6	3	FALSE	FALSE	TRUE	FALSE	0.978	-0.032	164
Q5T4S7	E3 ubiquitin-protein ligase UBR4 OS=Homo sapiens GN=UBR4 PE=1 SV=1 - [UBR4_HUMAN]	UBR4	2313.89	14.93	1	60	62	100	5183	573.5	6.04	1.092	0.127	98	24.2	1.045	0.064	98	20.3	0.0955869	22.25	1.032	0.045	98	12.6	1.081	0.112	98	13.6	0.0792928	13.1	1.121	0.165	98	21.1	1.149	0.2	98	22.3	0.182692	21.7	0	FALSE	FALSE	TRUE	FALSE	0.991	-0.013	98
Q86V97	Kelch repeat and BTB domain-containing protein 6 OS=Homo sapiens GN=KBTBD6 PE=1 SV=1 - [KBTB6_HUMAN]	KBTBD6	33.49	2.82	2	2	2	2	674	76.1	6.07	1.126	0.171	2	2.8	0.923	-0.116	2	9.8	0.03492	6.3	1.121	0.165	2	1.2	1.354	0.437	2	7.8	0.307429	4.5	1.252	0.324	2	4	1.244	0.315	2	17.7	0.319618	10.85		FALSE	FALSE	FALSE		0.986	-0.02	2
Q5XUX0	F-box only protein 31 OS=Homo sapiens GN=FBXO31 PE=1 SV=2 - [FBX31_HUMAN]	FBXO31	19.55	2.97	1	1	1	1	539	60.6	7.02	1.337	0.419	1	NA	1.386	0.471	1	NA	0.445197	NA	0.999	-0.001	1	NA	0.965	-0.051	1	NA	-0.0262051	NA	1.324	0.405	1	NA	1.331	0.413	1	NA	0.408712	NA		FALSE	FALSE	FALSE		0.932	-0.102	1
Q9H0H3	Kelch-like protein 25 OS=Homo sapiens GN=KLHL25 PE=1 SV=1 - [KLH25_HUMAN]	KLHL25	28.2	1.53	1	1	1	1	589	65.9	6.57	1.041	0.058	1	NA	1.284	0.361	1	NA	0.217231	NA	1.14	0.189	1	NA	0.955	-0.066	1	NA	0.0669502	NA	1.176	0.234	1	NA	1.22	0.287	1	NA	0.260628	NA		FALSE	FALSE	FALSE		1.035	0.05	1
Q96PQ7	Kelch-like protein 5 OS=Homo sapiens GN=KLHL5 PE=2 SV=3 - [KLHL5_HUMAN]	KLHL5	25.21	1.32	1	1	1	1	755	84.4	6.64	0.8	-0.322	1	NA	0.782	-0.355	1	NA	-0.33825	NA	1.201	0.264	1	NA	1.197	0.259	1	NA	0.261832	NA	0.953	-0.069	1	NA	0.931	-0.103	1	NA	-0.086201	NA		FALSE	FALSE	FALSE		1.014	0.02	1
Q9H2C0	Gigaxonin OS=Homo sapiens GN=GAN PE=1 SV=1 - [GAN_HUMAN]	GAN	255.42	15.41	1	6	6	7	597	67.6	5.85	1.032	0.045	5	6.7	1.054	0.076	5	19.7	0.0607392	13.2	0.929	-0.106	5	25.7	1.058	0.081	5	11.1	-0.00940813	18.4	1.125	0.17	5	29	1.049	0.069	5	7.6	0.120352	18.3	0	FALSE	FALSE	TRUE	FALSE	0.99	-0.014	5
Q96MP8	BTB/POZ domain-containing protein KCTD7 OS=Homo sapiens GN=KCTD7 PE=1 SV=1 - [KCTD7_HUMAN]	KCTD7	28.66	2.42	1	1	1	1	289	33.1	5.91	0.991	-0.013	1	NA	1.123	0.167	1	NA	0.0799754	NA	1.251	0.323	1	NA	1.212	0.277	1	NA	0.300417	NA	1.229	0.297	1	NA	1.354	0.437	1	NA	0.369048	NA		FALSE	FALSE	FALSE		0.966	-0.05	1
Q9H469	F-box/LRR-repeat protein 15 OS=Homo sapiens GN=FBXL15 PE=1 SV=2 - [FXL15_HUMAN]	FBXL15	21.91	4	1	1	1	1	300	33	7.44	0.959	-0.06	1	NA	0.851	-0.233	1	NA	-0.14401	NA	1.112	0.153	1	NA	1.201	0.264	1	NA	0.209765	NA	1.058	0.081	1	NA	1.017	0.024	1	NA	0.0531113	NA		FALSE	FALSE	FALSE		1.067	0.094	1
Q9UK22	F-box only protein 2 OS=Homo sapiens GN=FBXO2 PE=1 SV=2 - [FBX2_HUMAN]	FBXO2	763.24	32.43	1	6	6	22	296	33.3	4.37	1.465	0.551	22	25.1	1.549	0.631	22	37.7	0.591679	31.4	1.212	0.277	22	15.2	1.323	0.404	22	20.2	0.341986	17.7	1.717	0.78	22	41.8	1.895	0.922	22	43.3	0.852798	42.55	3	FALSE	FALSE	TRUE	FALSE	0.99	-0.014	22
Q9NVR0	Kelch-like protein 11 OS=Homo sapiens GN=KLHL11 PE=1 SV=1 - [KLH11_HUMAN]	KLHL11	99.9	7.34	1	4	4	5	708	80.1	6.16	1.129	0.175	5	12.4	1.001	0.001	5	17.6	0.0908534	15	0.945	-0.082	5	4.8	1.081	0.112	5	7.4	0.0186342	6.1	1.21	0.275	5	7	1.052	0.073	5	10.1	0.177599	8.55	0	FALSE	FALSE	TRUE	FALSE	1.037	0.052	5
Q969M7	NEDD8-conjugating enzyme UBE2F OS=Homo sapiens GN=UBE2F PE=1 SV=1 - [UBE2F_HUMAN]	UBE2F	156.77	19.46	1	5	5	7	185	21.1	6.79	0.867	-0.206	7	58.3	0.784	-0.351	7	51.6	-0.27666	54.95	1.896	0.923	7	60.6	0.687	-0.542	7	63.5	0.369048	62.05	1.206	0.27	7	51.2	0.628	-0.671	7	42.7	-0.125006	46.95		FALSE	FALSE	TRUE	TRUE	1.488	0.573	7
Q8TB52	F-box only protein 30 OS=Homo sapiens GN=FBXO30 PE=1 SV=3 - [FBX30_HUMAN]	FBXO30	524.82	20.27	1	11	11	20	745	82.3	5.4	0.975	-0.037	20	21.3	0.941	-0.088	20	19.6	-0.0619024	20.45	0.961	-0.057	20	12.3	1.061	0.085	20	16.1	0.015783	14.2	0.93	-0.105	20	9.1	0.998	-0.003	20	16.8	-0.0528949	12.95	0	FALSE	FALSE	TRUE	FALSE	0.981	-0.028	20
Q9Y575	Ankyrin repeat and SOCS box protein 3 OS=Homo sapiens GN=ASB3 PE=1 SV=1 - [ASB3_HUMAN]	ASB3	24.28	1.93	1	1	1	1	518	57.7	6.27	0.867	-0.206	1	NA	0.708	-0.498	1	NA	-0.344648	NA	1.248	0.32	1	NA	1.296	0.374	1	NA	0.347099	NA	1.073	0.102	1	NA	0.913	-0.131	1	NA	-0.0101344	NA		FALSE	FALSE	FALSE		1.077	0.107	1
Q9NWX5	Ankyrin repeat and SOCS box protein 6 OS=Homo sapiens GN=ASB6 PE=1 SV=1 - [ASB6_HUMAN]	ASB6	38.72	2.61	1	1	1	1	421	47.1	6.01	0.682	-0.552	1	NA	0.787	-0.346	1	NA	-0.445166	NA	0.973	-0.039	1	NA	0.905	-0.144	1	NA	-0.0908029	NA	0.658	-0.604	1	NA	0.708	-0.498	1	NA	-0.550043	NA		FALSE	FALSE	FALSE		0.896	-0.158	1
Q9P2J3	Kelch-like protein 9 OS=Homo sapiens GN=KLHL9 PE=1 SV=2 - [KLHL9_HUMAN]	KLHL9	208.89	11.67	2	6	6	9	617	69.4	6.35	1.273	0.348	9	17.1	1.082	0.114	9	13.6	0.235727	15.35	0.869	-0.203	9	17.2	0.993	-0.01	9	15.6	-0.103147	16.4	1.112	0.153	9	6.6	1.077	0.107	9	13.3	0.130272	9.95	0	FALSE	FALSE	TRUE	FALSE	1.009	0.013	9
Q6PCT2	F-box/LRR-repeat protein 19 OS=Homo sapiens GN=FBXL19 PE=1 SV=3 - [FXL19_HUMAN]	FBXL19	30.28	1.73	1	1	1	1	694	75.7	9.17	1.408	0.494	1	NA	1.237	0.307	1	NA	0.403268	NA	1.427	0.513	1	NA	1.32	0.401	1	NA	0.457857	NA	1.991	0.993	1	NA	1.625	0.7	1	NA	0.854395	NA		FALSE	FALSE	FALSE		1.103	0.141	1
Q8N461	F-box/LRR-repeat protein 16 OS=Homo sapiens GN=FBXL16 PE=2 SV=2 - [FXL16_HUMAN]	FBXL16	33.77	3.13	1	1	1	1	479	51.6	6.52	1.319	0.399	1	NA	1.042	0.059	1	NA	0.239398	NA	1.232	0.301	1	NA	1.57	0.651	1	NA	0.486457	NA	1.611	0.688	1	NA	1.628	0.703	1	NA	0.695548	NA		FALSE	FALSE	FALSE		1.032	0.045	1
Q96IG2	F-box/LRR-repeat protein 20 OS=Homo sapiens GN=FBXL20 PE=1 SV=2 - [FXL20_HUMAN]	FBXL20	77.24	2.52	1	1	1	1	436	48.4	7.49	1.208	0.273	1	NA	1.355	0.438	1	NA	0.357833	NA	1.297	0.375	1	NA	1.275	0.35	1	NA	0.362891	NA	1.553	0.635	1	NA	1.72	0.782	1	NA	0.710614	NA		FALSE	FALSE	FALSE		0.983	-0.025	1
Q8N3Y1	F-box/WD repeat-containing protein 8 OS=Homo sapiens GN=FBXW8 PE=1 SV=2 - [FBXW8_HUMAN]	FBXW8	77.56	4.01	1	2	2	3	598	67.4	5.67	0.702	-0.51	3	21.7	0.8	-0.322	3	4	-0.413115	12.85	0.959	-0.06	3	13.9	0.897	-0.157	3	25.8	-0.107803	19.85	0.667	-0.584	3	55.2	0.694	-0.527	3	44.8	-0.555333	50	4	FALSE	FALSE	TRUE	FALSE	0.859	-0.219	3
Q8NFY9	Kelch repeat and BTB domain-containing protein 8 OS=Homo sapiens GN=KBTBD8 PE=2 SV=2 - [KBTB8_HUMAN]	KBTBD8	93.04	3.16	1	1	1	1	601	68.8	6.29	0.918	-0.123	1	NA	0.898	-0.155	1	NA	-0.139236	NA	0.973	-0.039	1	NA	1.009	0.013	1	NA	-0.013043	NA	0.886	-0.175	1	NA	0.901	-0.15	1	NA	-0.16246	NA		FALSE	FALSE	FALSE		1.06	0.084	1
Q15345	Leucine-rich repeat-containing protein 41 OS=Homo sapiens GN=LRRC41 PE=1 SV=3 - [LRC41_HUMAN]	LRRC41	164.19	6.77	1	3	3	4	812	88.6	8.38	0.712	-0.49	4	23.8	0.94	-0.089	4	10.3	-0.275786	17.05	0.834	-0.262	4	33.8	0.66	-0.599	4	64.9	-0.42082	49.35	0.612	-0.708	4	54	0.603	-0.73	4	116.2	-0.719044	85.1		FALSE	FALSE	TRUE	TRUE	0.815	-0.295	4
Q53GT1	Kelch-like protein 22 OS=Homo sapiens GN=KLHL22 PE=1 SV=2 - [KLH22_HUMAN]	KLHL22	67.97	8.99	1	4	5	5	634	71.6	5.49	0.936	-0.095	4	2.3	0.912	-0.133	4	9.1	-0.114035	5.7	1.115	0.157	4	15.6	1.232	0.301	4	18.6	0.230818	17.1	1.1	0.138	4	9.8	1.028	0.04	4	12.9	0.0894982	11.35	0	FALSE	FALSE	TRUE	FALSE	1.007	0.01	4
Q8NEZ5	F-box only protein 22 OS=Homo sapiens GN=FBXO22 PE=1 SV=1 - [FBX22_HUMAN]	FBXO22	280.98	23.08	1	9	9	15	403	44.5	7.03	1.048	0.068	13	14.7	1.012	0.017	13	12.3	0.0426443	13.5	0.777	-0.364	13	13.1	0.788	-0.344	13	24.4	-0.353837	18.75	0.946	-0.08	13	14.1	0.926	-0.111	13	23.9	-0.0954196	19	6	FALSE	FALSE	TRUE	FALSE	1.002	0.003	13
Q9UBF6	RING-box protein 2 OS=Homo sapiens GN=RNF7 PE=1 SV=1 - [RBX2_HUMAN]	RNF7	87.52	19.47	1	1	1	1	113	12.7	5.44	1.054	0.076	1	NA	3.757	1.91	1	NA	1.26634	NA	0.991	-0.013	1	NA	0.292	-1.776	1	NA	-0.640479	NA	1.036	0.051	1	NA	1.091	0.126	1	NA	0.08882	NA		FALSE	FALSE	FALSE		0.98	-0.029	1
Q9H0C5	BTB/POZ domain-containing protein 1 OS=Homo sapiens GN=BTBD1 PE=1 SV=1 - [BTBD1_HUMAN]	BTBD1	56.7	4.98	1	2	2	2	482	52.7	6.1	1.016	0.023	2	0.2	1.064	0.089	2	10.1	0.0565835	5.15	0.929	-0.106	2	16.7	1.015	0.021	2	16.4	-0.0409718	16.55	0.935	-0.097	2	16.4	1.074	0.103	2	6.2	0.00647756	11.3		FALSE	FALSE	FALSE		0.969	-0.045	2
Q9Y576	Ankyrin repeat and SOCS box protein 1 OS=Homo sapiens GN=ASB1 PE=1 SV=1 - [ASB1_HUMAN]	ASB1	30.76	5.07	1	1	1	1	335	37	8.21	NA	NA	NA	NA	NA	NA	NA	NA	NA	NA	NA	NA	NA	NA	NA	NA	NA	NA	NA	NA	NA	NA	NA	NA	NA	NA	NA	NA	NA	NA		TRUE	FALSE			NA	NA	NA
Q86XK2	F-box only protein 11 OS=Homo sapiens GN=FBXO11 PE=1 SV=3 - [FBX11_HUMAN]	FBXO11	36.9	3.02	1	3	3	3	927	103.5	6.99	1.01	0.014	3	18.3	0.853	-0.229	3	15	-0.102372	16.65	1.038	0.054	3	1.3	1.068	0.095	3	5.2	0.0745054	3.25	1.031	0.044	3	0.6	0.907	-0.141	3	9.7	-0.0454314	5.15	0	FALSE	FALSE	TRUE	FALSE	1.148	0.199	3
Q9Y3I1	F-box only protein 7 OS=Homo sapiens GN=FBXO7 PE=1 SV=1 - [FBX7_HUMAN]	FBXO7	37.91	2.11	1	1	1	1	522	58.5	6.55	0.745	-0.425	1	NA	0.886	-0.175	1	NA	-0.294243	NA	0.949	-0.076	1	NA	0.948	-0.077	1	NA	-0.0762803	NA	0.7	-0.515	1	NA	0.836	-0.258	1	NA	-0.380822	NA		FALSE	FALSE	FALSE		0.964	-0.053	1
Q5XPI4	E3 ubiquitin-protein ligase RNF123 OS=Homo sapiens GN=RNF123 PE=1 SV=1 - [RN123_HUMAN]	RNF123	141.95	5.4	1	4	4	4	1314	148.4	6.74	0.991	-0.013	4	2.7	1.08	0.111	4	9.6	0.0503276	6.15	1.248	0.32	4	11.6	1.367	0.451	4	7.4	0.386811	9.5	1.249	0.321	4	12.2	1.388	0.473	4	24.9	0.398898	18.55	1	FALSE	FALSE	TRUE	FALSE	0.915	-0.128	4
Q8N2K1	Ubiquitin-conjugating enzyme E2 J2 OS=Homo sapiens GN=UBE2J2 PE=1 SV=3 - [UB2J2_HUMAN]	UBE2J2	89.81	5.41	1	1	1	3	259	28.9	8.4	1.022	0.031	3	1.4	1.138	0.187	3	6.3	0.111031	3.85	1.036	0.051	3	0.3	0.989	-0.016	3	9	0.0179219	4.65	1.042	0.059	3	1	0.998	-0.003	3	26.5	0.0285692	13.75	0	FALSE	FALSE	TRUE	FALSE	1.032	0.045	3
A0AVT1	Ubiquitin-like modifier-activating enzyme 6 OS=Homo sapiens GN=UBA6 PE=1 SV=1 - [UBA6_HUMAN]	UBA6	2214.17	38.21	1	37	37	84	1052	117.9	6.14	0.92	-0.12	84	25.7	0.927	-0.109	84	30.7	-0.114816	28.2	1.14	0.189	84	17.1	1.232	0.301	84	16.1	0.246104	16.6	1.063	0.088	84	17	1.168	0.224	84	19	0.157691	18	0	FALSE	FALSE	TRUE	FALSE	0.95	-0.074	84
Q712K3	Ubiquitin-conjugating enzyme E2 R2 OS=Homo sapiens GN=UBE2R2 PE=1 SV=1 - [UB2R2_HUMAN]	UBE2R2	131.37	22.27	1	6	6	9	238	27.1	4.42	1.144	0.194	9	27.9	1.071	0.099	9	19.4	0.147307	23.65	1.016	0.023	9	19.8	1.026	0.037	9	17.2	0.0299829	18.5	0.998	-0.003	9	12	1.035	0.05	9	9	0.0236102	10.5	0	FALSE	FALSE	TRUE	FALSE	0.923	-0.116	9
Q8WVN8	Ubiquitin-conjugating enzyme E2 Q2 OS=Homo sapiens GN=UBE2Q2 PE=1 SV=1 - [UB2Q2_HUMAN]	UBE2Q2	61.56	7.2	1	1	3	3	375	42.8	4.96	1.025	0.036	1	NA	1.345	0.428	1	NA	0.244887	NA	0.711	-0.492	1	NA	0.686	-0.544	1	NA	-0.517668	NA	0.723	-0.468	1	NA	0.918	-0.123	1	NA	-0.285425	NA		FALSE	FALSE	FALSE		0.869	-0.203	1
P62256	Ubiquitin-conjugating enzyme E2 H OS=Homo sapiens GN=UBE2H PE=1 SV=1 - [UBE2H_HUMAN]	UBE2H	503.11	37.16	1	8	8	20	183	20.6	4.67	0.774	-0.37	20	21.1	0.804	-0.315	20	19.1	-0.341903	20.1	0.749	-0.417	20	21	0.818	-0.29	20	18.2	-0.351995	19.6	0.631	-0.664	20	39.2	0.702	-0.51	20	18	-0.585323	28.6	5	FALSE	FALSE	TRUE	FALSE	0.942	-0.086	20
P62253	Ubiquitin-conjugating enzyme E2 G1 OS=Homo sapiens GN=UBE2G1 PE=1 SV=3 - [UB2G1_HUMAN]	UBE2G1	271.23	34.12	1	7	7	12	170	19.5	5.3	1.568	0.649	9	21	1.711	0.775	9	33.8	0.713256	27.4	0.725	-0.464	9	16.8	0.626	-0.676	9	21.7	-0.565972	19.25	1.106	0.145	9	10.2	1.126	0.171	9	13.3	0.158337	11.75	6	FALSE	FALSE	TRUE	FALSE	0.955	-0.066	9
P60604	Ubiquitin-conjugating enzyme E2 G2 OS=Homo sapiens GN=UBE2G2 PE=1 SV=1 - [UB2G2_HUMAN]	UBE2G2	70.14	18.79	1	2	2	2	165	18.6	4.7	0.899	-0.154	2	7.2	0.937	-0.094	2	7.1	-0.123434	7.15	1.156	0.209	2	38.5	0.977	-0.034	2	9.4	0.092884	23.95	1.03	0.043	2	30.6	0.911	-0.134	2	2.3	-0.0431999	16.45		FALSE	FALSE	FALSE		1.035	0.05	2
P22314	Ubiquitin-like modifier-activating enzyme 1 OS=Homo sapiens GN=UBA1 PE=1 SV=3 - [UBA1_HUMAN]	UBA1	15592.7	60.68	1	68	68	481	1058	117.8	5.76	1.048	0.068	472	23.4	1.114	0.156	472	30.8	0.112367	27.1	1.248	0.32	473	19.3	1.316	0.396	472	20.9	0.358396	20.1	1.325	0.406	472	28.1	1.449	0.535	472	27.4	0.471968	27.75	1	FALSE	FALSE	TRUE	FALSE	0.963	-0.054	472
Q16763	Ubiquitin-conjugating enzyme E2 S OS=Homo sapiens GN=UBE2S PE=1 SV=2 - [UBE2S_HUMAN]	UBE2S	143.14	41.44	3	6	7	7	222	23.8	8.38	1.038	0.054	6	45	0.775	-0.368	6	36.6	-0.141621	40.8	0.947	-0.079	6	17.6	1.013	0.019	6	32.5	-0.0291463	25.05	0.939	-0.091	6	61.3	0.779	-0.36	6	47.6	-0.21927	54.45	0	FALSE	FALSE	TRUE	FALSE	1.042	0.059	6
Q9H832	Ubiquitin-conjugating enzyme E2 Z OS=Homo sapiens GN=UBE2Z PE=1 SV=2 - [UBE2Z_HUMAN]	UBE2Z	363.65	26.84	1	6	6	17	354	38.2	5.62	0.784	-0.351	17	32.9	0.814	-0.297	17	25	-0.323733	28.95	1.082	0.114	17	15.4	1.212	0.277	17	10.7	0.197865	13.05	0.95	-0.074	17	19.5	1.131	0.178	17	16.1	0.057277	17.8	4	FALSE	FALSE	TRUE	FALSE	1.003	0.004	17
Q96PM5	RING finger and CHY zinc finger domain-containing protein 1 OS=Homo sapiens GN=RCHY1 PE=1 SV=1 - [ZN363_HUMAN]	RCHY1	52.72	9.96	1	2	2	2	261	30.1	6.71	0.721	-0.472	1	NA	0.746	-0.423	1	NA	-0.447131	NA	1.273	0.348	1	NA	1.282	0.358	1	NA	0.353323	NA	0.91	-0.136	1	NA	0.951	-0.072	1	NA	-0.103922	NA		FALSE	FALSE	FALSE		1.049	0.069	1
Q13191	E3 ubiquitin-protein ligase CBL-B OS=Homo sapiens GN=CBLB PE=1 SV=2 - [CBLB_HUMAN]	CBLB	82.22	4.18	1	1	4	6	982	109.4	7.88	1.135	0.183	1	NA	1.037	0.052	1	NA	0.119024	NA	0.937	-0.094	1	NA	0.946	-0.08	1	NA	-0.086967	NA	1.054	0.076	1	NA	0.977	-0.034	1	NA	0.0221902	NA		FALSE	FALSE	FALSE		1.046	0.065	1
Q8TBC4	NEDD8-activating enzyme E1 catalytic subunit OS=Homo sapiens GN=UBA3 PE=1 SV=2 - [UBA3_HUMAN]	UBA3	1834.87	55.94	1	19	19	47	463	51.8	5.45	0.998	-0.003	47	14.2	1.038	0.054	47	16.2	0.0257376	15.2	1.033	0.047	47	10.7	1.09	0.124	47	17.1	0.0861044	13.9	1.012	0.017	47	13.5	1.126	0.171	47	17.6	0.0962619	15.55	0	FALSE	FALSE	TRUE	FALSE	0.968	-0.047	47
Q01201	Transcription factor RelB OS=Homo sapiens GN=RELB PE=1 SV=2 - [RELB_HUMAN]	RELB	52.32	4.66	1	2	2	2	579	62.1	6.24	1.038	0.054	2	19.3	0.876	-0.191	2	18.9	-0.0634092	19.1	1.104	0.143	2	14.2	1.159	0.213	2	4.8	0.178237	9.5	1.136	0.184	2	34.1	1.01	0.014	2	14	0.10165	24.05		FALSE	FALSE	FALSE		1.141	0.19	2
P29400	Collagen alpha-5(IV) chain OS=Homo sapiens GN=COL4A5 PE=1 SV=2 - [CO4A5_HUMAN]	COL4A5	76.97	1.42	1	1	2	3	1685	160.9	7.62	1.205	0.269	2	6.6	1.263	0.337	2	1.1	0.303342	3.85	0.803	-0.317	2	1.7	0.793	-0.335	2	3.2	-0.325539	2.45	0.959	-0.06	2	8.3	0.996	-0.006	2	4.3	-0.0328314	6.3		FALSE	FALSE	FALSE		0.994	-0.009	2
P02458	Collagen alpha-1(II) chain OS=Homo sapiens GN=COL2A1 PE=1 SV=3 - [CO2A1_HUMAN]	COL2A1	367.23	8.88	1	10	10	15	1487	141.7	6.92	1.485	0.57	15	16.9	1.389	0.474	15	27.5	0.52306	22.2	0.67	-0.578	15	14.4	0.562	-0.831	15	26.5	-0.698998	20.45	1.086	0.119	15	47.2	0.811	-0.302	15	26.8	-0.0762803	37	6	FALSE	FALSE	TRUE	FALSE	1.148	0.199	15
P05997	Collagen alpha-2(V) chain OS=Homo sapiens GN=COL5A2 PE=1 SV=3 - [CO5A2_HUMAN]	COL5A2	158.83	4.27	1	5	5	6	1499	144.8	6.46	1.371	0.455	6	17.2	1.414	0.5	6	14.1	0.477677	15.65	0.999	-0.001	6	3.5	1.005	0.007	6	2.8	0.00288251	3.15	1.333	0.415	6	13.8	1.26	0.333	6	26.4	0.374622	20.1	3	FALSE	FALSE	TRUE	FALSE	1.108	0.148	6
P20908	Collagen alpha-1(V) chain OS=Homo sapiens GN=COL5A1 PE=1 SV=3 - [CO5A1_HUMAN]	COL5A1	692.35	11.32	1	15	16	25	1838	183.4	5.06	0.937	-0.094	24	27.5	0.953	-0.069	24	17.2	-0.0816138	22.35	1.079	0.11	24	11.1	1.047	0.066	24	14.5	0.0881416	12.8	1.009	0.013	24	25	0.972	-0.041	24	27	-0.0137711	26	0	FALSE	FALSE	TRUE	FALSE	1.02	0.029	24
P02462	Collagen alpha-1(IV) chain OS=Homo sapiens GN=COL4A1 PE=1 SV=3 - [CO4A1_HUMAN]	COL4A1	86.98	1.74	1	1	2	2	1669	160.5	8.28	1.719	0.782	1	NA	2.306	1.205	1	NA	1.00899	NA	0.887	-0.173	1	NA	0.865	-0.209	1	NA	-0.190997	NA	1.511	0.596	1	NA	1.985	0.989	1	NA	0.805705	NA		FALSE	FALSE	FALSE		1.062	0.087	1
P08572	Collagen alpha-2(IV) chain OS=Homo sapiens GN=COL4A2 PE=1 SV=4 - [CO4A2_HUMAN]	COL4A2	88.66	1.64	1	2	2	3	1712	167.4	8.66	0.855	-0.226	3	17.4	0.878	-0.188	3	12.4	-0.206728	14.9	1.124	0.169	3	12.4	1.218	0.285	3	15.3	0.227741	13.85	0.928	-0.108	3	16.2	0.932	-0.102	3	8.3	-0.104697	12.25	0	FALSE	FALSE	TRUE	FALSE	1.002	0.003	3
Q96A83	Collagen alpha-1(XXVI) chain OS=Homo sapiens GN=COL26A1 PE=1 SV=1 - [COQA1_HUMAN]	COL26A1	26.52	3.85	1	1	1	1	441	45.4	7.31	0.76	-0.396	1	NA	1.007	0.01	1	NA	-0.178698	NA	1.188	0.249	1	NA	0.963	-0.054	1	NA	0.105008	NA	0.895	-0.16	1	NA	0.965	-0.051	1	NA	-0.104697	NA		FALSE	FALSE	FALSE		0.866	-0.208	1
Q13443	Disintegrin and metalloproteinase domain-containing protein 9 OS=Homo sapiens GN=ADAM9 PE=1 SV=1 - [ADAM9_HUMAN]	ADAM9	212.06	11.84	1	7	7	11	819	90.5	7.52	1.132	0.179	11	25	1.016	0.023	11	19.3	0.102994	22.15	0.962	-0.056	11	10.4	0.989	-0.016	11	23.5	-0.0357862	16.95	0.978	-0.032	11	15	0.944	-0.083	11	29.1	-0.0573917	22.05	0	FALSE	FALSE	TRUE	FALSE	1.064	0.089	11
P27658	Collagen alpha-1(VIII) chain OS=Homo sapiens GN=COL8A1 PE=1 SV=2 - [CO8A1_HUMAN]	COL8A1	50.58	4.17	1	3	3	4	744	73.3	9.61	0.763	-0.39	4	6.9	0.821	-0.285	4	7.5	-0.336428	7.2	1.32	0.401	4	7	1.304	0.383	4	6.7	0.391768	6.85	0.991	-0.013	4	8.5	1.105	0.144	4	2.1	0.0676387	5.3	1	FALSE	FALSE	TRUE	FALSE	1.005	0.007	4
P29353	SHC-transforming protein 1 OS=Homo sapiens GN=SHC1 PE=1 SV=4 - [SHC1_HUMAN]	SHC1	97.09	7.03	2	4	4	7	583	62.8	6.44	1.069	0.096	7	22.2	0.925	-0.112	7	36.3	-0.00433459	29.25	1.047	0.066	7	13.8	1.008	0.011	7	22	0.0391384	17.9	1.068	0.095	7	11.3	0.99	-0.014	7	6.8	0.041243	9.05	0	FALSE	FALSE	TRUE	FALSE	1.066	0.092	7
Q96AX9	E3 ubiquitin-protein ligase MIB2 OS=Homo sapiens GN=MIB2 PE=1 SV=3 - [MIB2_HUMAN]	MIB2	85	2.96	1	4	4	4	1013	109.9	8.44	0.864	-0.211	4	4.9	0.861	-0.216	4	5	-0.213404	4.95	1.158	0.212	4	9.1	1.108	0.148	4	4.3	0.180148	6.7	0.982	-0.026	4	12.6	0.945	-0.082	4	3.7	-0.0536434	8.15	0	FALSE	FALSE	TRUE	FALSE	1.045	0.064	4
P78536	Disintegrin and metalloproteinase domain-containing protein 17 OS=Homo sapiens GN=ADAM17 PE=1 SV=1 - [ADA17_HUMAN]	ADAM17	35.76	0.97	1	1	1	1	824	93	5.76	0.853	-0.229	1	NA	0.942	-0.086	1	NA	-0.156016	NA	0.794	-0.333	1	NA	0.77	-0.377	1	NA	-0.354759	NA	0.671	-0.576	1	NA	0.721	-0.472	1	NA	-0.522841	NA		FALSE	FALSE	FALSE		0.902	-0.149	1
P78504	Protein jagged-1 OS=Homo sapiens GN=JAG1 PE=1 SV=3 - [JAG1_HUMAN]	JAG1	117.59	3.61	1	3	3	3	1218	133.7	6.06	0.901	-0.15	3	22.6	1.134	0.181	3	24.3	0.0250288	23.45	0.851	-0.233	3	0.7	0.725	-0.464	3	3.1	-0.343732	1.9	0.759	-0.398	3	38.9	0.818	-0.29	3	21.1	-0.342817	30	5	FALSE	FALSE	TRUE	FALSE	0.986	-0.02	3
Q13573	SNW domain-containing protein 1 OS=Homo sapiens GN=SNW1 PE=1 SV=1 - [SNW1_HUMAN]	SNW1	1067.72	52.61	1	26	26	49	536	61.5	9.52	0.989	-0.016	49	16.5	0.939	-0.091	49	18.4	-0.0528949	17.45	0.955	-0.066	49	15.3	0.937	-0.094	49	23.3	-0.0800879	19.3	0.934	-0.099	49	21.4	0.932	-0.102	49	16.4	-0.100051	18.9	0	FALSE	FALSE	TRUE	FALSE	0.996	-0.006	49
Q92585	Mastermind-like protein 1 OS=Homo sapiens GN=MAML1 PE=1 SV=3 - [MAML1_HUMAN]	MAML1	49.48	0.98	1	1	1	1	1016	108	8.28	0.939	-0.091	1	NA	0.949	-0.076	1	NA	-0.0831412	NA	0.908	-0.139	1	NA	0.907	-0.141	1	NA	-0.14003	NA	0.845	-0.243	1	NA	0.857	-0.223	1	NA	-0.232769	NA		FALSE	FALSE	FALSE		0.904	-0.146	1
Q06330	Recombining binding protein suppressor of hairless OS=Homo sapiens GN=RBPJ PE=1 SV=3 - [SUH_HUMAN]	RBPJ	212.04	12.8	2	6	6	7	500	55.6	7.18	1.274	0.349	7	9.2	1.186	0.246	7	38.8	0.298658	24	0.888	-0.171	7	7.4	0.808	-0.308	7	22.3	-0.237864	14.85	1.243	0.314	7	19.7	1.159	0.213	7	15.4	0.264236	17.55	0	FALSE	FALSE	TRUE	FALSE	0.939	-0.091	7
Q8IZL2	Mastermind-like protein 2 OS=Homo sapiens GN=MAML2 PE=1 SV=2 - [MAML2_HUMAN]	MAML2	28.14	1.04	1	1	1	1	1156	125.1	9.42	1.007	0.01	1	NA	0.784	-0.351	1	NA	-0.159235	NA	0.979	-0.031	1	NA	1.29	0.367	1	NA	0.182057	NA	0.977	-0.034	1	NA	1.006	0.009	1	NA	-0.0123153	NA		FALSE	FALSE	FALSE		1.05	0.07	1
P49336	Cyclin-dependent kinase 8 OS=Homo sapiens GN=CDK8 PE=1 SV=1 - [CDK8_HUMAN]	CDK8	78.93	9.48	2	4	4	4	464	53.2	8.57	0.993	-0.01	4	21.9	1.009	0.013	4	5.9	0.00144197	13.9	1.018	0.026	4	4.3	1.067	0.094	4	11.8	0.0600474	8.05	0.937	-0.094	4	32.5	1.071	0.099	4	12	0.00575927	22.25	0	FALSE	FALSE	TRUE	FALSE	0.993	-0.01	4
Q9Y618	Nuclear receptor corepressor 2 OS=Homo sapiens GN=NCOR2 PE=1 SV=2 - [NCOR2_HUMAN]	NCOR2	292.8	4.4	1	7	10	15	2525	274.6	7.59	1.133	0.18	11	13.9	1.147	0.198	11	20.1	0.189034	17	0.84	-0.252	11	7.6	0.877	-0.189	10	5.3	-0.22011	6.45	0.913	-0.131	11	12.7	0.979	-0.031	10	11.4	-0.0800879	12.05	0	FALSE	FALSE	TRUE	FALSE	0.944	-0.083	11
Q8WUI4	Histone deacetylase 7 OS=Homo sapiens GN=HDAC7 PE=1 SV=2 - [HDAC7_HUMAN]	HDAC7	52.69	2.21	1	1	1	1	952	102.9	7.58	1.088	0.122	1	NA	0.894	-0.162	1	NA	-0.013043	NA	0.98	-0.029	1	NA	1.159	0.213	1	NA	0.0969365	NA	1.057	0.08	1	NA	1.031	0.044	1	NA	0.0621217	NA		FALSE	FALSE	FALSE		1.053	0.075	1
Q99832	T-complex protein 1 subunit eta OS=Homo sapiens GN=CCT7 PE=1 SV=2 - [TCPH_HUMAN]	CCT7	8248.51	69.98	1	46	46	249	543	59.3	7.65	0.906	-0.142	242	25.6	0.96	-0.059	242	27.4	-0.100051	26.5	0.94	-0.089	242	16.5	0.968	-0.047	242	15.5	-0.0679388	16	0.876	-0.191	242	20.9	0.955	-0.066	242	20.1	-0.127368	20.5	0	FALSE	FALSE	TRUE	FALSE	0.951	-0.072	242
P40227	T-complex protein 1 subunit zeta OS=Homo sapiens GN=CCT6A PE=1 SV=3 - [TCPZ_HUMAN]	CCT6A	7662.92	78.72	2	40	40	266	531	58	6.68	0.889	-0.17	262	16.9	0.905	-0.144	262	21	-0.15682	18.95	0.927	-0.109	262	14.7	0.947	-0.079	262	14.3	-0.093879	14.5	0.804	-0.315	262	16	0.865	-0.209	262	18.9	-0.261016	17.45	0	FALSE	FALSE	TRUE	FALSE	0.991	-0.013	262
P48643	T-complex protein 1 subunit epsilon OS=Homo sapiens GN=CCT5 PE=1 SV=1 - [TCPE_HUMAN]	CCT5	7748.21	84.47	1	50	52	349	541	59.6	5.66	0.904	-0.146	311	19.7	0.903	-0.147	311	20.2	-0.146403	19.95	0.92	-0.12	311	15.5	0.952	-0.071	311	16.9	-0.0954196	16.2	0.828	-0.272	311	20.1	0.874	-0.194	311	18.3	-0.232769	19.2	0	FALSE	FALSE	TRUE	FALSE	0.971	-0.042	311
P49368	T-complex protein 1 subunit gamma OS=Homo sapiens GN=CCT3 PE=1 SV=4 - [TCPG_HUMAN]	CCT3	8297.76	78.72	1	53	54	308	545	60.5	6.49	1.071	0.099	297	24.4	1.131	0.178	297	29.2	0.138814	26.8	0.895	-0.16	297	16.3	0.892	-0.165	297	20.7	-0.16246	18.5	0.942	-0.086	297	19.2	0.995	-0.007	297	18.3	-0.046176	18.75	0	FALSE	FALSE	TRUE	FALSE	0.96	-0.059	297
P78371	T-complex protein 1 subunit beta OS=Homo sapiens GN=CCT2 PE=1 SV=4 - [TCPB_HUMAN]	CCT2	11997.3	85.23	1	54	54	356	535	57.5	6.46	0.945	-0.082	356	23.5	0.949	-0.076	356	29.9	-0.0785637	26.7	0.958	-0.062	356	17.1	0.979	-0.031	356	17.7	-0.046176	17.4	0.883	-0.18	356	23	0.949	-0.076	356	24.1	-0.12658	23.55	0	FALSE	FALSE	TRUE	FALSE	0.982	-0.026	356
P50990	T-complex protein 1 subunit theta OS=Homo sapiens GN=CCT8 PE=1 SV=4 - [TCPQ_HUMAN]	CCT8	7684.63	68.98	1	50	50	294	548	59.6	5.6	0.925	-0.112	293	23.6	0.934	-0.099	293	23.2	-0.105473	23.4	0.962	-0.056	293	15.7	0.971	-0.042	293	14.1	-0.0491584	14.9	0.872	-0.198	293	22.3	0.937	-0.094	293	19.1	-0.144808	20.7	0	FALSE	FALSE	TRUE	FALSE	0.972	-0.041	293
P50991	T-complex protein 1 subunit delta OS=Homo sapiens GN=CCT4 PE=1 SV=4 - [TCPD_HUMAN]	CCT4	6129.33	87.76	1	50	51	247	539	57.9	7.83	0.947	-0.079	241	27.6	0.986	-0.02	241	29.3	-0.0491584	28.45	0.951	-0.072	241	20.5	0.94	-0.089	241	22	-0.0808506	21.25	0.852	-0.231	241	27.1	0.918	-0.123	241	25.6	-0.176251	26.35	0	FALSE	FALSE	TRUE	FALSE	0.95	-0.074	241
Q96FJ2	Dynein light chain 2, cytoplasmic OS=Homo sapiens GN=DYNLL2 PE=1 SV=1 - [DYL2_HUMAN]	DYNLL2	204.21	59.55	1	3	5	8	89	10.3	7.37	1.258	0.331	3	27.8	1.057	0.08	3	34.5	0.211012	31.15	1.212	0.277	3	8.4	1.085	0.118	3	18.6	0.199751	13.5	1.352	0.435	3	45.5	1.008	0.011	3	44.8	0.238787	45.15	0	FALSE	FALSE	TRUE	FALSE	1.053	0.075	3
Q9NZQ7	Programmed cell death 1 ligand 1 OS=Homo sapiens GN=CD274 PE=1 SV=1 - [PD1L1_HUMAN]	CD274	31.06	4.48	1	1	1	1	290	33.3	7.23	1.262	0.336	1	NA	1.109	0.149	1	NA	0.245496	NA	1.11	0.151	1	NA	1.293	0.371	1	NA	0.264837	NA	1.388	0.473	1	NA	1.426	0.512	1	NA	0.492622	NA		FALSE	FALSE	FALSE		1.064	0.089	1
P01857	Ig gamma-1 chain C region OS=Homo sapiens GN=IGHG1 PE=1 SV=1 - [IGHG1_HUMAN]	IGHG1	273.74	18.79	1	1	5	9	330	36.1	8.19	5.417	2.437	2	106.4	0.825	-0.278	2	6	1.64201	56.2	0.413	-1.276	2	19.4	1.267	0.341	2	17.4	-0.251539	18.4	2.215	1.147	2	76.5	1.041	0.058	2	23.5	0.703101	50		FALSE	FALSE	FALSE		1.035	0.05	2
P01859	Ig gamma-2 chain C region OS=Homo sapiens GN=IGHG2 PE=1 SV=2 - [IGHG2_HUMAN]	IGHG2	239.29	12.58	1	2	3	6	326	35.9	7.59	3.775	1.916	4	52.1	0.808	-0.308	4	14.6	1.19629	33.35	0.439	-1.188	4	22.9	1.031	0.044	4	13.3	-0.444184	18.1	1.716	0.779	4	23.1	0.875	-0.193	4	18.7	0.373509	20.9		FALSE	FALSE	TRUE	TRUE	0.972	-0.041	4
P01860	Ig gamma-3 chain C region OS=Homo sapiens GN=IGHG3 PE=1 SV=2 - [IGHG3_HUMAN]	IGHG3	239.26	20.69	1	1	5	9	377	41.3	7.9	7.518	2.91	2	23.9	0.879	-0.186	2	8.2	2.06987	16.05	0.448	-1.158	2	17	0.962	-0.056	2	40.6	-0.504305	28.8	3.335	1.738	2	6.7	0.841	-0.25	2	50	1.06212	28.35		FALSE	FALSE	FALSE		1.3	0.379	2
Q9NX63	MICOS complex subunit MIC19 OS=Homo sapiens GN=CHCHD3 PE=1 SV=1 - [MIC19_HUMAN]	CHCHD3	935.38	60.35	1	16	16	41	227	26.1	8.28	0.944	-0.083	41	42.4	0.938	-0.092	41	21.7	-0.0877334	32.05	1.084	0.116	41	14.6	1.01	0.014	41	13.4	0.0662614	14	0.979	-0.031	41	25.1	0.977	-0.034	41	19.9	-0.0320936	22.5	0	FALSE	FALSE	TRUE	FALSE	1.05	0.07	41
Q13505	Metaxin-1 OS=Homo sapiens GN=MTX1 PE=1 SV=2 - [MTX1_HUMAN]	MTX1	437.77	15.02	1	4	5	18	466	51.4	9.79	1.055	0.077	17	27.6	1.108	0.148	17	26.5	0.113034	27.05	1.012	0.017	17	13	1.067	0.094	17	4.7	0.0558898	8.85	1.033	0.047	17	18.1	1.158	0.212	17	28.2	0.131589	23.15	0	FALSE	FALSE	TRUE	FALSE	1.069	0.096	17
Q9Y512	Sorting and assembly machinery component 50 homolog OS=Homo sapiens GN=SAMM50 PE=1 SV=3 - [SAM50_HUMAN]	SAMM50	346.57	18.98	1	8	8	15	469	51.9	6.9	1.029	0.041	15	31.2	1.085	0.118	15	36.9	0.0799754	34.05	0.97	-0.044	15	13.4	0.862	-0.214	15	22	-0.12658	17.7	1.041	0.058	15	20	0.953	-0.069	15	30.1	-0.00433459	25.05	0	FALSE	FALSE	TRUE	FALSE	1.068	0.095	15
O75431	Metaxin-2 OS=Homo sapiens GN=MTX2 PE=1 SV=1 - [MTX2_HUMAN]	MTX2	441.92	32.7	1	9	9	16	263	29.7	6.29	1.056	0.079	16	27.4	1.05	0.07	16	23.4	0.0745054	25.4	0.995	-0.007	16	15.7	1.045	0.064	16	11.2	0.0285692	13.45	1.108	0.148	16	26.8	1.061	0.085	16	19.7	0.11703	23.25	0	FALSE	FALSE	TRUE	FALSE	0.96	-0.059	16
Q9BUR5	MICOS complex subunit MIC26 OS=Homo sapiens GN=APOO PE=1 SV=1 - [MIC26_HUMAN]	APOO	249.56	33.33	1	7	7	10	198	22.3	9.13	0.856	-0.224	10	21.4	0.842	-0.248	10	15.6	-0.236164	18.5	1.139	0.188	10	15.6	1.071	0.099	10	19.9	0.144046	17.75	0.97	-0.044	10	18.2	0.932	-0.102	10	9	-0.0724828	13.6	0	FALSE	FALSE	TRUE	FALSE	1.05	0.07	10
P17152	Transmembrane protein 11, mitochondrial OS=Homo sapiens GN=TMEM11 PE=1 SV=1 - [TMM11_HUMAN]	TMEM11	138.24	23.44	1	5	5	6	192	21.5	7.36	1.143	0.193	6	18.5	1.147	0.198	6	15.5	0.195348	17	0.978	-0.032	6	4.7	1.07	0.098	6	2	0.0342157	3.35	1.108	0.148	6	11.6	1.158	0.212	6	20.8	0.180148	16.2	0	FALSE	FALSE	TRUE	FALSE	1.001	0.001	6
Q5TGZ0	MICOS complex subunit MIC10 OS=Homo sapiens GN=MINOS1 PE=1 SV=1 - [MIC10_HUMAN]	MINOS1	22.04	10.26	1	1	1	1	78	8.8	8.5	1.034	0.048	1	NA	1.088	0.122	1	NA	0.0854247	NA	0.8	-0.322	1	NA	0.975	-0.037	1	NA	-0.172181	NA	0.821	-0.285	1	NA	1.055	0.077	1	NA	-0.0923402	NA		FALSE	FALSE	FALSE		0.909	-0.138	1
Q9BRQ6	MICOS complex subunit MIC25 OS=Homo sapiens GN=CHCHD6 PE=1 SV=1 - [MIC25_HUMAN]	CHCHD6	216.58	42.98	1	10	10	17	235	26.4	8.85	1.082	0.114	17	20.6	1.115	0.157	17	25	0.135535	22.8	1.264	0.338	17	14.5	1.299	0.377	17	11.8	0.357833	13.15	1.303	0.382	17	20.4	1.3	0.379	17	21.3	0.380175	20.85	1	FALSE	FALSE	TRUE	FALSE	1.049	0.069	17
Q16891	MICOS complex subunit MIC60 OS=Homo sapiens GN=IMMT PE=1 SV=1 - [MIC60_HUMAN]	IMMT	3088.28	60.42	1	55	55	137	758	83.6	6.48	1.002	0.003	137	20.7	1.089	0.123	137	22.6	0.0641931	21.65	1.088	0.122	137	15.2	0.976	-0.035	137	13.9	0.045443	14.55	1.056	0.079	137	23.8	1.02	0.029	137	20.8	0.0538064	22.3	0	FALSE	FALSE	TRUE	FALSE	1.066	0.092	137
Q5XKP0	MICOS complex subunit MIC13 OS=Homo sapiens GN=MIC13 PE=1 SV=1 - [MIC13_HUMAN]	MIC13	120.69	45.76	1	2	2	4	118	13.1	9.42	0.897	-0.157	4	15.3	0.897	-0.157	4	20.1	-0.15682	17.7	1.023	0.033	4	9.7	0.985	-0.022	4	1	0.00575927	5.35	0.873	-0.196	4	29.9	0.806	-0.311	4	19.1	-0.252398	24.5	0	FALSE	FALSE	TRUE	FALSE	1.029	0.041	4
Q9NVH1	DnaJ homolog subfamily C member 11 OS=Homo sapiens GN=DNAJC11 PE=1 SV=2 - [DJC11_HUMAN]	DNAJC11	368.54	26.48	1	11	11	15	559	63.2	8.4	1.012	0.017	14	23.6	1.096	0.132	14	27.8	0.0758749	25.7	1.017	0.024	14	14.3	0.961	-0.057	14	23.5	-0.0159576	18.9	1.015	0.021	14	15.1	0.974	-0.038	14	13.3	-0.00795672	14.2	0	FALSE	FALSE	TRUE	FALSE	1.02	0.029	14
P00846	ATP synthase subunit a OS=Homo sapiens GN=MT-ATP6 PE=1 SV=1 - [ATP6_HUMAN]	MT-ATP6	55.6	4.42	1	1	1	1	226	24.8	10.1	1.497	0.582	1	NA	1.663	0.734	1	NA	0.659925	NA	0.716	-0.482	1	NA	0.673	-0.571	1	NA	-0.525953	NA	1.063	0.088	1	NA	1.113	0.154	1	NA	0.121679	NA		FALSE	FALSE	FALSE		1	0	1
Q99766	ATP synthase subunit s, mitochondrial OS=Homo sapiens GN=ATP5S PE=1 SV=3 - [ATP5S_HUMAN]	ATP5S	45.59	6.05	1	1	1	1	215	24.8	7.56	0.793	-0.335	1	NA	0.929	-0.106	1	NA	-0.215915	NA	1.395	0.48	1	NA	1.047	0.066	1	NA	0.288063	NA	1.097	0.134	1	NA	0.967	-0.048	1	NA	0.045443	NA		FALSE	FALSE	FALSE		0.94	-0.089	1
P56381	ATP synthase subunit epsilon, mitochondrial OS=Homo sapiens GN=ATP5E PE=1 SV=2 - [ATP5E_HUMAN]	ATP5E	66.08	29.41	2	3	3	6	51	5.8	9.92	0.914	-0.13	6	14.5	0.909	-0.138	6	7.2	-0.133685	10.85	0.978	-0.032	6	14	1.088	0.122	6	8.8	0.0468403	11.4	0.823	-0.281	6	6.1	0.905	-0.144	6	13.4	-0.210897	9.75	0	FALSE	FALSE	TRUE	FALSE	0.952	-0.071	6
P18859	ATP synthase-coupling factor 6, mitochondrial OS=Homo sapiens GN=ATP5J PE=1 SV=1 - [ATP5J_HUMAN]	ATP5J	450.52	55.56	1	6	6	18	108	12.6	9.52	0.82	-0.286	18	10.5	0.855	-0.226	18	12.4	-0.255839	11.45	1.279	0.355	18	14.7	1.42	0.506	18	40.9	0.432425	27.8	1.113	0.154	18	10.3	1.315	0.395	18	11.7	0.279768	11	1	FALSE	FALSE	TRUE	FALSE	1.006	0.009	18
P03928	ATP synthase protein 8 OS=Homo sapiens GN=MT-ATP8 PE=1 SV=1 - [ATP8_HUMAN]	MT-ATP8	24.72	13.24	1	1	1	1	68	8	9.91	0.96	-0.059	1	NA	0.976	-0.035	1	NA	-0.046921	NA	1.064	0.089	1	NA	1.021	0.03	1	NA	0.0600474	NA	1.012	0.017	1	NA	0.991	-0.013	1	NA	0.00216242	NA		FALSE	FALSE	FALSE		1.049	0.069	1
O75964	ATP synthase subunit g, mitochondrial OS=Homo sapiens GN=ATP5L PE=1 SV=3 - [ATP5L_HUMAN]	ATP5L	232.95	53.4	3	5	5	10	103	11.4	9.64	1.005	0.007	10	11	1.345	0.428	10	19.1	0.232661	15.05	0.851	-0.233	10	7.8	0.65	-0.621	10	20.3	-0.414076	14.05	0.804	-0.315	10	10.4	0.848	-0.238	10	17.2	-0.275786	13.8	6	FALSE	FALSE	TRUE	FALSE	0.979	-0.031	10
P56385	ATP synthase subunit e, mitochondrial OS=Homo sapiens GN=ATP5I PE=1 SV=2 - [ATP5I_HUMAN]	ATP5I	539.66	36.23	1	4	4	25	69	7.9	9.35	0.809	-0.306	25	17.1	0.837	-0.257	25	36.1	-0.281036	26.6	1.066	0.092	25	23.8	0.976	-0.035	25	29.1	0.0299829	26.45	0.95	-0.074	25	24.1	0.917	-0.125	25	24	-0.0992781	24.05	0	FALSE	FALSE	TRUE	FALSE	1.049	0.069	25
P56134	ATP synthase subunit f, mitochondrial OS=Homo sapiens GN=ATP5J2 PE=1 SV=3 - [ATPK_HUMAN]	ATP5J2	204.36	39.36	1	3	3	8	94	10.9	9.67	1.078	0.108	8	19.5	1.285	0.362	8	47.4	0.24062	33.45	0.871	-0.199	8	24.5	0.685	-0.546	8	30.9	-0.362158	27.7	0.926	-0.111	8	11.4	0.939	-0.091	8	18.4	-0.100824	14.9	6	FALSE	FALSE	TRUE	FALSE	1.005	0.007	8
P24539	ATP synthase F(0) complex subunit B1, mitochondrial OS=Homo sapiens GN=ATP5F1 PE=1 SV=2 - [AT5F1_HUMAN]	ATP5F1	469.66	28.52	1	9	9	29	256	28.9	9.36	1.12	0.163	29	36.2	1.326	0.407	29	41.2	0.290424	38.7	0.941	-0.088	29	29.5	0.642	-0.639	29	43	-0.337339	36.25	1.001	0.001	29	21.4	0.984	-0.023	29	33.1	-0.010861	27.25	6	FALSE	FALSE	TRUE	FALSE	1.026	0.037	29
O75947	ATP synthase subunit d, mitochondrial OS=Homo sapiens GN=ATP5H PE=1 SV=3 - [ATP5H_HUMAN]	ATP5H	2482.93	83.23	1	16	16	90	161	18.5	5.3	0.887	-0.173	90	17.3	1.034	0.048	90	13.6	-0.0581425	15.45	1.064	0.089	90	13.9	0.858	-0.221	90	15	-0.0573917	14.45	0.958	-0.062	90	12.2	0.896	-0.158	90	14.7	-0.109359	13.45	0	FALSE	FALSE	TRUE	FALSE	1.072	0.1	90
P48047	ATP synthase subunit O, mitochondrial OS=Homo sapiens GN=ATP5O PE=1 SV=1 - [ATPO_HUMAN]	ATP5O	1036.7	58.69	1	13	13	40	213	23.3	9.96	0.934	-0.099	40	14	0.946	-0.08	40	24.4	-0.0892673	19.2	1.077	0.107	40	13.4	1.088	0.122	40	17.1	0.114367	15.25	0.95	-0.074	40	10.2	1.04	0.057	40	13.6	-0.00723157	11.9	0	FALSE	FALSE	TRUE	FALSE	0.999	-0.001	40
Q6UXV4	MICOS complex subunit MIC27 OS=Homo sapiens GN=APOOL PE=1 SV=1 - [MIC27_HUMAN]	APOOL	35.59	5.22	1	1	1	1	268	29.1	9.52	0.772	-0.373	1	NA	0.865	-0.209	1	NA	-0.288946	NA	1.241	0.312	1	NA	1.141	0.19	1	NA	0.252173	NA	0.95	-0.074	1	NA	0.982	-0.026	1	NA	-0.0499049	NA		FALSE	FALSE	FALSE		0.933	-0.1	1
P13497	Bone morphogenetic protein 1 OS=Homo sapiens GN=BMP1 PE=1 SV=2 - [BMP1_HUMAN]	BMP1	179.25	8.82	3	6	6	8	986	111.2	6.9	1.153	0.205	8	14.6	1.187	0.247	8	19.9	0.226509	17.25	1.054	0.076	8	18	1.077	0.107	8	14.6	0.0915306	16.3	1.195	0.257	8	15.4	1.219	0.286	8	15.8	0.271426	15.6	0	FALSE	FALSE	TRUE	FALSE	1.065	0.091	8
Q9Y4K0	Lysyl oxidase homolog 2 OS=Homo sapiens GN=LOXL2 PE=1 SV=1 - [LOXL2_HUMAN]	LOXL2	276.49	10.85	1	6	6	7	774	86.7	6.38	1.098	0.135	7	36.6	1.092	0.127	7	41	0.130931	38.8	0.731	-0.452	7	9	0.82	-0.286	7	20.1	-0.366801	14.55	0.727	-0.46	7	11.5	0.891	-0.167	7	21.8	-0.305788	16.65	6	FALSE	FALSE	TRUE	FALSE	1.112	0.153	7
P58215	Lysyl oxidase homolog 3 OS=Homo sapiens GN=LOXL3 PE=2 SV=1 - [LOXL3_HUMAN]	LOXL3	77.79	2.92	1	1	1	1	753	83.1	6.86	1.191	0.252	1	NA	1.499	0.584	1	NA	0.427606	NA	1.078	0.108	1	NA	0.939	-0.091	1	NA	0.0122111	NA	1.272	0.347	1	NA	1.4	0.485	1	NA	0.41792	NA		FALSE	FALSE	FALSE		0.923	-0.116	1
Q92626	Peroxidasin homolog OS=Homo sapiens GN=PXDN PE=1 SV=2 - [PXDN_HUMAN]	PXDN	371.28	12.85	1	15	15	18	1479	165.2	7.17	1.014	0.02	18	25.1	1.102	0.14	18	21.8	0.0813396	23.45	1.1	0.138	18	9.2	0.947	-0.079	18	20.9	0.0335111	15.05	1.08	0.111	18	23.3	1.071	0.099	18	21.1	0.105008	22.2	0	FALSE	FALSE	TRUE	FALSE	1.042	0.059	18
P06865	Beta-hexosaminidase subunit alpha OS=Homo sapiens GN=HEXA PE=1 SV=2 - [HEXA_HUMAN]	HEXA	337.92	28.17	1	11	12	17	529	60.7	5.16	1.295	0.373	15	39.5	1.472	0.558	15	43.4	0.468323	41.45	1.035	0.05	15	14.9	1.16	0.214	15	21.9	0.134221	18.4	1.312	0.392	15	20.6	1.351	0.434	15	29.1	0.413052	24.85	3	FALSE	FALSE	TRUE	FALSE	0.986	-0.02	15
P22304	Iduronate 2-sulfatase OS=Homo sapiens GN=IDS PE=1 SV=1 - [IDS_HUMAN]	IDS	21.73	1.64	1	1	1	1	550	61.8	5.45	0.809	-0.306	1	NA	0.816	-0.293	1	NA	-0.29956	NA	1.309	0.388	1	NA	1.385	0.47	1	NA	0.42975	NA	1.05	0.07	1	NA	1.124	0.169	1	NA	0.120352	NA		FALSE	FALSE	FALSE		0.954	-0.068	1
P32929	Cystathionine gamma-lyase OS=Homo sapiens GN=CTH PE=1 SV=3 - [CGL_HUMAN]	CTH	185.52	15.56	1	5	5	8	405	44.5	6.7	1.257	0.33	8	16.8	1.294	0.372	8	12.8	0.351063	14.8	0.846	-0.241	8	11	0.875	-0.193	8	20.2	-0.216753	15.6	1.031	0.044	8	7.2	1.143	0.193	8	7	0.120352	7.1	6	FALSE	FALSE	TRUE	FALSE	1.006	0.009	8
Q12933	TNF receptor-associated factor 2 OS=Homo sapiens GN=TRAF2 PE=1 SV=2 - [TRAF2_HUMAN]	TRAF2	334.4	23.15	1	11	11	18	501	55.8	7.53	0.875	-0.193	18	29.6	0.803	-0.317	18	16.9	-0.253257	23.25	1.097	0.134	18	10.1	1.229	0.297	18	7.2	0.217851	8.65	0.929	-0.106	18	23.1	0.98	-0.029	18	13.8	-0.0671829	18.45	0	FALSE	FALSE	TRUE	FALSE	0.989	-0.016	18
Q13490	Baculoviral IAP repeat-containing protein 2 OS=Homo sapiens GN=BIRC2 PE=1 SV=2 - [BIRC2_HUMAN]	BIRC2	67.32	9.39	2	5	5	5	618	69.9	6.7	0.705	-0.504	5	13.6	0.705	-0.504	5	17.7	-0.504305	15.65	1.205	0.269	5	3.2	1.192	0.253	5	15.2	0.26123	9.2	0.842	-0.248	5	61	0.743	-0.429	5	21	-0.335517	41	4	FALSE	FALSE	TRUE	FALSE	1.062	0.087	5
P17987	T-complex protein 1 subunit alpha OS=Homo sapiens GN=TCP1 PE=1 SV=1 - [TCPA_HUMAN]	TCP1	6309.6	77.34	1	44	44	222	556	60.3	6.11	1.018	0.026	197	28.9	1.069	0.096	197	27.2	0.0614306	28.05	0.909	-0.138	197	16.3	0.942	-0.086	197	16	-0.111695	16.15	0.933	-0.1	197	25.3	0.967	-0.048	197	22.8	-0.0740006	24.05	0	FALSE	FALSE	TRUE	FALSE	0.972	-0.041	197
P07237	Protein disulfide-isomerase OS=Homo sapiens GN=P4HB PE=1 SV=3 - [PDIA1_HUMAN]	P4HB	4796.39	81.1	1	52	53	196	508	57.1	4.87	0.984	-0.023	192	32.1	1.041	0.058	192	27.1	0.0179219	29.6	0.956	-0.065	192	28.1	0.846	-0.241	192	31.7	-0.150401	29.9	0.959	-0.06	192	21.1	0.888	-0.171	192	25.2	-0.114816	23.15	0	FALSE	FALSE	TRUE	FALSE	1.055	0.077	192
P38919	Eukaryotic initiation factor 4A-III OS=Homo sapiens GN=EIF4A3 PE=1 SV=4 - [IF4A3_HUMAN]	EIF4A3	2023.26	62.77	1	25	29	91	411	46.8	6.73	1.206	0.27	69	31	1.264	0.338	69	30.7	0.304511	30.85	0.849	-0.236	69	19.5	0.844	-0.245	69	21.2	-0.240418	20.35	1.008	0.011	69	21.4	1.054	0.076	69	17.7	0.0440443	19.55	6	FALSE	FALSE	TRUE	FALSE	0.924	-0.114	69
O75925	E3 SUMO-protein ligase PIAS1 OS=Homo sapiens GN=PIAS1 PE=1 SV=2 - [PIAS1_HUMAN]	PIAS1	44.72	2.3	2	1	2	4	651	71.8	7.3	0.954	-0.068	1	NA	1.023	0.033	1	NA	-0.0166871	NA	1.047	0.066	1	NA	1.026	0.037	1	NA	0.0517201	NA	0.99	-0.014	1	NA	1.045	0.064	1	NA	0.0250288	NA		FALSE	FALSE	FALSE		0.984	-0.023	1
P61769	Beta-2-microglobulin OS=Homo sapiens GN=B2M PE=1 SV=1 - [B2MG_HUMAN]	B2M	59.86	8.4	1	1	1	1	119	13.7	6.52	2.62	1.39	1	NA	3.833	1.938	1	NA	1.68997	NA	0.528	-0.921	1	NA	0.438	-1.191	1	NA	-1.0499	NA	1.37	0.454	1	NA	1.672	0.742	1	NA	0.60502	NA		FALSE	FALSE	FALSE		0.886	-0.175	1
P05161	Ubiquitin-like protein ISG15 OS=Homo sapiens GN=ISG15 PE=1 SV=5 - [ISG15_HUMAN]	ISG15	80.43	20.61	1	4	4	8	165	17.9	7.44	1.049	0.069	8	18.9	1.147	0.198	8	30.1	0.134878	24.5	0.729	-0.456	8	25.2	0.759	-0.398	8	23.1	-0.426625	24.15	0.756	-0.404	8	26.3	0.847	-0.24	8	7.1	-0.319226	16.7	6	FALSE	FALSE	TRUE	FALSE	0.91	-0.136	8
P52292	Importin subunit alpha-1 OS=Homo sapiens GN=KPNA2 PE=1 SV=1 - [IMA1_HUMAN]	KPNA2	2812.24	50.66	2	23	23	93	529	57.8	5.4	0.98	-0.029	87	25.7	1.078	0.108	87	33.9	0.041243	29.8	0.608	-0.718	87	32.6	0.638	-0.648	87	43.5	-0.682696	38.05	0.689	-0.537	87	30	0.72	-0.474	87	31	-0.505328	30.5	5	FALSE	FALSE	TRUE	FALSE	0.928	-0.108	87
P29590	Protein PML OS=Homo sapiens GN=PML PE=1 SV=3 - [PML_HUMAN]	PML	117.79	7.82	1	6	6	6	882	97.5	6.21	0.974	-0.038	6	13.9	0.918	-0.123	6	23	-0.0800879	18.45	1.03	0.043	6	6.8	1.136	0.184	6	15	0.115033	10.9	1.01	0.014	6	13.4	0.995	-0.007	6	11	0.00360224	12.2	0	FALSE	FALSE	TRUE	FALSE	1.03	0.043	6
Q14258	E3 ubiquitin/ISG15 ligase TRIM25 OS=Homo sapiens GN=TRIM25 PE=1 SV=2 - [TRI25_HUMAN]	TRIM25	420.66	29.05	1	14	14	20	630	70.9	8.09	1.035	0.05	20	17.8	1.025	0.036	20	14.4	0.0426443	16.1	0.928	-0.108	20	10.4	0.926	-0.111	20	17.6	-0.109359	14	0.943	-0.085	20	19.6	0.996	-0.006	20	15.1	-0.0446872	17.35	0	FALSE	FALSE	TRUE	FALSE	0.979	-0.031	20
Q13555	Calcium/calmodulin-dependent protein kinase type II subunit gamma OS=Homo sapiens GN=CAMK2G PE=1 SV=3 - [KCC2G_HUMAN]	CAMK2G	1094.98	33.87	1	10	17	48	558	62.6	7.83	1.044	0.062	15	25.6	1.008	0.011	15	27.9	0.0370307	26.75	1.566	0.647	15	15.8	1.47	0.556	15	21.4	0.602172	18.6	1.516	0.6	15	39	1.741	0.8	15	28	0.703544	33.5	1	FALSE	FALSE	TRUE	FALSE	0.981	-0.028	15
Q13557	Calcium/calmodulin-dependent protein kinase type II subunit delta OS=Homo sapiens GN=CAMK2D PE=1 SV=3 - [KCC2D_HUMAN]	CAMK2D	3370.74	52.1	1	20	28	121	499	56.3	7.25	1.028	0.04	82	24.9	1.072	0.1	82	29.5	0.0703893	27.2	0.879	-0.186	82	13.7	0.929	-0.106	82	17.9	-0.145605	15.8	0.889	-0.17	82	21.4	0.926	-0.111	82	21.2	-0.14003	21.3	0	FALSE	FALSE	TRUE	FALSE	0.958	-0.062	82
Q9UQM7	Calcium/calmodulin-dependent protein kinase type II subunit alpha OS=Homo sapiens GN=CAMK2A PE=1 SV=2 - [KCC2A_HUMAN]	CAMK2A	709.97	21.13	1	2	9	35	478	54.1	7.08	1.215	0.281	3	1.8	1.056	0.079	3	2.3	0.183328	2.05	2.015	1.011	3	11	2.387	1.255	3	3.9	1.13816	7.45	2.284	1.192	3	10.7	2.47	1.305	3	6.2	1.24914	8.45	2	FALSE	FALSE	TRUE	FALSE	1.005	0.007	3
O00329	Phosphatidylinositol 4,5-bisphosphate 3-kinase catalytic subunit delta isoform OS=Homo sapiens GN=PIK3CD PE=1 SV=2 - [PK3CD_HUMAN]	PIK3CD	0	0.57	1	1	1	1	1044	119.4	7.18	1.219	0.286	1	NA	1.108	0.148	1	NA	0.218471	NA	1.402	0.487	1	NA	1.699	0.765	1	NA	0.632734	NA	1.694	0.76	1	NA	1.873	0.905	1	NA	0.834711	NA		FALSE	FALSE	FALSE		1.025	0.036	1
P35568	Insulin receptor substrate 1 OS=Homo sapiens GN=IRS1 PE=1 SV=1 - [IRS1_HUMAN]	IRS1	104.51	3.86	1	4	4	4	1242	131.5	8.54	0.965	-0.051	4	10.9	0.756	-0.404	4	6.1	-0.216753	8.5	0.774	-0.37	4	7.5	0.883	-0.18	4	15	-0.271426	11.25	0.797	-0.327	4	16.6	0.71	-0.494	4	13.9	-0.408321	15.25	5	FALSE	FALSE	TRUE	FALSE	1.034	0.048	4
Q9Y4H2	Insulin receptor substrate 2 OS=Homo sapiens GN=IRS2 PE=1 SV=2 - [IRS2_HUMAN]	IRS2	91.91	1.94	1	3	3	5	1338	137.2	8.65	0.859	-0.219	5	20.7	0.77	-0.377	5	13	-0.296013	16.85	0.94	-0.089	5	17.8	1.023	0.033	5	11.9	-0.0269398	14.85	0.886	-0.175	5	15.2	0.836	-0.258	5	30.2	-0.215915	22.7	0	FALSE	FALSE	TRUE	FALSE	1.127	0.172	5
Q9UQC2	GRB2-associated-binding protein 2 OS=Homo sapiens GN=GAB2 PE=1 SV=1 - [GAB2_HUMAN]	GAB2	39.1	1.63	1	1	1	1	676	74.4	8.31	1.084	0.116	1	NA	1.214	0.28	1	NA	0.200379	NA	1.169	0.225	1	NA	1.089	0.123	1	NA	0.175045	NA	1.256	0.329	1	NA	1.315	0.395	1	NA	0.36233	NA		FALSE	FALSE	FALSE		0.981	-0.028	1
P46109	Crk-like protein OS=Homo sapiens GN=CRKL PE=1 SV=1 - [CRKL_HUMAN]	CRKL	784.24	54.13	1	13	13	36	303	33.8	6.74	0.982	-0.026	34	22	0.924	-0.114	34	20.3	-0.0694519	21.15	0.954	-0.068	34	32.5	1.175	0.233	34	20.3	0.0901759	26.4	0.898	-0.155	34	20.9	1.02	0.029	34	17.7	-0.0603973	19.3	0	FALSE	FALSE	TRUE	FALSE	0.919	-0.122	34
Q9UHD2	Serine/threonine-protein kinase TBK1 OS=Homo sapiens GN=TBK1 PE=1 SV=1 - [TBK1_HUMAN]	TBK1	277.19	8.37	1	4	4	6	729	83.6	6.79	1.029	0.041	6	2.4	1.096	0.132	6	15.4	0.0874628	8.9	1.107	0.147	6	15.5	1.19	0.251	6	11.4	0.199751	13.45	1.151	0.203	6	12.4	1.428	0.514	6	11.3	0.366812	11.85	1	FALSE	FALSE	TRUE	FALSE	0.974	-0.038	6
Q13114	TNF receptor-associated factor 3 OS=Homo sapiens GN=TRAF3 PE=1 SV=2 - [TRAF3_HUMAN]	TRAF3	30.99	2.46	1	1	1	1	568	64.4	7.91	0.99	-0.014	1	NA	0.818	-0.29	1	NA	-0.145605	NA	1.194	0.256	1	NA	1.555	0.637	1	NA	0.458907	NA	1.172	0.229	1	NA	1.265	0.339	1	NA	0.285106	NA		FALSE	FALSE	FALSE		1.059	0.083	1
Q14653	Interferon regulatory factor 3 OS=Homo sapiens GN=IRF3 PE=1 SV=1 - [IRF3_HUMAN]	IRF3	62.85	6.32	1	2	2	3	427	47.2	5.34	1.019	0.027	3	13.8	1.033	0.047	3	21	0.0370307	17.4	1.037	0.052	3	2.4	1.054	0.076	3	4.3	0.0641931	3.35	0.971	-0.042	3	0.5	1.133	0.18	3	32.5	0.0731347	16.5	0	FALSE	FALSE	TRUE	FALSE	1.08	0.111	3
O75027	ATP-binding cassette sub-family B member 7, mitochondrial OS=Homo sapiens GN=ABCB7 PE=1 SV=2 - [ABCB7_HUMAN]	ABCB7	138.78	6.25	1	4	4	6	752	82.6	9.33	1.02	0.029	6	34.4	1.072	0.1	6	35.7	0.0648829	35.05	0.953	-0.069	6	13	0.873	-0.196	6	12.1	-0.131313	12.55	0.999	-0.001	6	7	0.928	-0.108	6	12.3	-0.0536434	9.65	0	FALSE	FALSE	TRUE	FALSE	1.034	0.048	6
P18074	TFIIH basal transcription factor complex helicase XPD subunit OS=Homo sapiens GN=ERCC2 PE=1 SV=1 - [ERCC2_HUMAN]	ERCC2	155.93	11.32	1	7	7	9	760	86.9	7.15	1.005	0.007	9	23.4	1.045	0.064	9	27.1	0.0356239	25.25	0.989	-0.016	9	8.7	1.093	0.128	9	9.5	0.0579701	9.1	0.955	-0.066	9	13.9	1.067	0.094	9	21.3	0.015783	17.6	0	FALSE	FALSE	TRUE	FALSE	0.976	-0.035	9
Q9H6Q4	Cytosolic Fe-S cluster assembly factor NARFL OS=Homo sapiens GN=NARFL PE=1 SV=1 - [NARFL_HUMAN]	NARFL	77.58	10.71	1	4	4	6	476	53	7.23	0.907	-0.141	6	25.4	0.825	-0.278	6	29.4	-0.207561	27.4	1.074	0.103	6	3.5	1.096	0.132	6	17.3	0.117695	10.4	1.001	0.001	6	16.9	0.94	-0.089	6	23.7	-0.0431999	20.3	0	FALSE	FALSE	TRUE	FALSE	0.977	-0.034	6
O76071	Probable cytosolic iron-sulfur protein assembly protein CIAO1 OS=Homo sapiens GN=CIAO1 PE=1 SV=1 - [CIAO1_HUMAN]	CIAO1	538.33	38.64	1	10	10	17	339	37.8	4.97	0.757	-0.402	17	10.8	0.772	-0.373	17	20.6	-0.387412	15.7	0.91	-0.136	17	12.2	1.068	0.095	17	14	-0.0159576	13.1	0.67	-0.578	17	7.3	0.818	-0.29	17	22.9	-0.426625	15.1	4	FALSE	FALSE	TRUE	FALSE	0.953	-0.069	17
Q6FI81	Anamorsin OS=Homo sapiens GN=CIAPIN1 PE=1 SV=2 - [CPIN1_HUMAN]	CIAPIN1	518.37	59.29	1	16	16	33	312	33.6	5.62	0.851	-0.233	33	22.7	0.93	-0.105	33	20.9	-0.167312	21.8	0.963	-0.054	33	14.8	0.965	-0.051	33	20	-0.0528949	17.4	0.832	-0.265	33	25.9	0.93	-0.105	33	19	-0.182786	22.45	0	FALSE	FALSE	TRUE	FALSE	0.962	-0.056	33
Q9Y5Y2	Cytosolic Fe-S cluster assembly factor NUBP2 OS=Homo sapiens GN=NUBP2 PE=1 SV=1 - [NUBP2_HUMAN]	NUBP2	759.31	36.9	1	7	7	25	271	28.8	5.83	0.838	-0.255	22	13.1	0.918	-0.123	22	16.9	-0.187707	15	0.977	-0.034	22	11.7	0.991	-0.013	22	15.1	-0.0232698	13.4	0.784	-0.351	22	24.8	0.934	-0.099	22	17.7	-0.21927	21.25	0	FALSE	FALSE	TRUE	FALSE	0.941	-0.088	22
P53384	Cytosolic Fe-S cluster assembly factor NUBP1 OS=Homo sapiens GN=NUBP1 PE=1 SV=2 - [NUBP1_HUMAN]	NUBP1	792.36	37.5	1	7	7	19	320	34.5	5.33	1.063	0.088	15	33.4	0.978	-0.032	15	11.9	0.0292762	22.65	1.019	0.027	15	19.2	0.873	-0.196	15	13	-0.0800879	16.1	1.041	0.058	15	39.6	0.92	-0.12	15	23.3	-0.0284105	31.45	0	FALSE	FALSE	TRUE	FALSE	0.986	-0.02	15
Q9Y3D0	Mitotic spindle-associated MMXD complex subunit MIP18 OS=Homo sapiens GN=FAM96B PE=1 SV=1 - [MIP18_HUMAN]	FAM96B	481.15	54.6	1	6	6	9	163	17.7	5.19	0.923	-0.116	8	9.5	1.043	0.061	8	12	-0.0247367	10.75	1.051	0.072	8	9.8	1.066	0.092	8	7.5	0.0820213	8.65	0.945	-0.082	8	16.1	1.101	0.139	8	17.2	0.0328061	16.65	0	FALSE	FALSE	TRUE	FALSE	0.927	-0.109	8
Q96T76	MMS19 nucleotide excision repair protein homolog OS=Homo sapiens GN=MMS19 PE=1 SV=2 - [MMS19_HUMAN]	MMS19	436.51	11.17	1	8	8	15	1030	113.2	6.35	1.097	0.134	15	19.5	1.01	0.014	15	32.5	0.0751903	26	0.982	-0.026	15	18.2	0.985	-0.022	15	21.5	-0.024003	19.85	0.99	-0.014	15	16	1.061	0.085	15	28.2	0.0363275	22.1	0	FALSE	FALSE	TRUE	FALSE	0.99	-0.014	15
P28340	DNA polymerase delta catalytic subunit OS=Homo sapiens GN=POLD1 PE=1 SV=2 - [DPOD1_HUMAN]	POLD1	543.81	17.89	1	16	17	25	1107	123.6	7.03	0.894	-0.162	23	18.8	0.901	-0.15	23	16	-0.156016	17.4	0.831	-0.267	23	21.7	0.879	-0.186	23	18.3	-0.226004	20	0.826	-0.276	23	17.7	0.78	-0.358	23	23.4	-0.316528	20.55	5	FALSE	FALSE	TRUE	FALSE	0.957	-0.063	23
Q9H2U1	ATP-dependent RNA helicase DHX36 OS=Homo sapiens GN=DHX36 PE=1 SV=2 - [DHX36_HUMAN]	DHX36	561.36	24.31	1	20	23	30	1008	114.7	7.68	0.98	-0.029	27	23.8	0.994	-0.009	27	25	-0.018878	24.4	1.065	0.091	27	9.5	1.075	0.104	27	12.1	0.0976108	10.8	1.058	0.081	27	19.9	1.054	0.076	27	21.8	0.0786098	20.85	0	FALSE	FALSE	TRUE	FALSE	1.003	0.004	27
Q16666	Gamma-interferon-inducible protein 16 OS=Homo sapiens GN=IFI16 PE=1 SV=3 - [IF16_HUMAN]	IFI16	104.15	8.03	2	4	4	4	785	88.2	9.28	1.088	0.122	4	14.4	1.22	0.287	4	17.3	0.206643	15.85	1.06	0.084	4	9.4	1.056	0.079	4	15.8	0.0813396	12.6	0.972	-0.041	4	7.2	1.162	0.217	4	14.1	0.0935602	10.65	0	FALSE	FALSE	TRUE	FALSE	1.066	0.092	4
Q9BRZ2	E3 ubiquitin-protein ligase TRIM56 OS=Homo sapiens GN=TRIM56 PE=1 SV=3 - [TRI56_HUMAN]	TRIM56	182.02	14.17	1	7	7	11	755	81.4	7.74	0.993	-0.01	11	17.9	0.911	-0.134	11	18	-0.0709665	17.95	0.854	-0.228	11	12.9	0.864	-0.211	11	12.2	-0.21927	12.55	0.803	-0.317	11	17.5	0.803	-0.317	11	14.6	-0.316528	16.05	5	FALSE	FALSE	TRUE	FALSE	1.024	0.034	11
Q9UJV9	Probable ATP-dependent RNA helicase DDX41 OS=Homo sapiens GN=DDX41 PE=1 SV=2 - [DDX41_HUMAN]	DDX41	374.53	24.6	1	12	12	17	622	69.8	6.84	0.889	-0.17	17	13.6	0.917	-0.125	17	7.6	-0.147202	10.6	0.95	-0.074	17	11.8	1.021	0.03	17	7.9	-0.0210722	9.85	0.811	-0.302	17	6.7	0.888	-0.171	17	10.3	-0.235314	8.5	0	FALSE	FALSE	TRUE	FALSE	0.963	-0.054	17
P41252	Isoleucine--tRNA ligase, cytoplasmic OS=Homo sapiens GN=IARS PE=1 SV=2 - [SYIC_HUMAN]	IARS	1954.41	38.99	1	43	43	84	1262	144.4	6.15	1.033	0.047	84	20.2	1.092	0.127	84	27.8	0.0874628	24	0.844	-0.245	84	18.2	0.862	-0.214	84	20.6	-0.229382	19.4	0.899	-0.154	84	16.1	0.965	-0.051	84	18.5	-0.101598	17.3	0	FALSE	FALSE	TRUE	FALSE	0.938	-0.092	84
P14868	Aspartate--tRNA ligase, cytoplasmic OS=Homo sapiens GN=DARS PE=1 SV=2 - [SYDC_HUMAN]	DARS	2019.75	73.65	1	36	37	92	501	57.1	6.55	1.045	0.064	91	29.5	1.069	0.096	91	26.8	0.0799754	28.15	0.849	-0.236	91	18	0.904	-0.146	91	20.1	-0.190174	19.05	0.89	-0.168	91	20.2	0.953	-0.069	91	19.4	-0.117944	19.8	0	FALSE	FALSE	TRUE	FALSE	0.925	-0.112	91
Q9P2J5	Leucine--tRNA ligase, cytoplasmic OS=Homo sapiens GN=LARS PE=1 SV=2 - [SYLC_HUMAN]	LARS	3199.03	45.83	1	53	53	133	1176	134.4	7.3	1.169	0.225	133	25	1.147	0.198	133	23.8	0.211635	24.4	0.864	-0.211	133	14.4	0.845	-0.243	133	16.7	-0.226848	15.55	0.997	-0.004	133	19	1.004	0.006	133	19.9	0.000721167	19.45	0	FALSE	FALSE	TRUE	FALSE	0.986	-0.02	133
Q12904	Aminoacyl tRNA synthase complex-interacting multifunctional protein 1 OS=Homo sapiens GN=AIMP1 PE=1 SV=2 - [AIMP1_HUMAN]	AIMP1	949.29	63.46	4	18	20	51	312	34.3	8.43	0.893	-0.163	43	19.9	0.98	-0.029	43	20.2	-0.0946491	20.05	0.956	-0.065	43	13.1	0.948	-0.077	43	13	-0.0709665	13.05	0.849	-0.236	43	21.5	0.911	-0.134	43	15.8	-0.184425	18.65	0	FALSE	FALSE	TRUE	FALSE	0.958	-0.062	43
P56192	Methionine--tRNA ligase, cytoplasmic OS=Homo sapiens GN=MARS PE=1 SV=2 - [SYMC_HUMAN]	MARS	1624.4	37.11	1	31	31	73	900	101.1	6.16	1.072	0.1	73	25.9	1.018	0.026	73	24.6	0.0635029	25.25	0.927	-0.109	73	19.1	0.963	-0.054	73	21.6	-0.0816138	20.35	0.964	-0.053	73	20.5	1.014	0.02	73	22.8	-0.0159576	21.65	0	FALSE	FALSE	TRUE	FALSE	0.982	-0.026	73
Q13155	Aminoacyl tRNA synthase complex-interacting multifunctional protein 2 OS=Homo sapiens GN=AIMP2 PE=1 SV=2 - [AIMP2_HUMAN]	AIMP2	424.01	31.56	1	8	8	22	320	35.3	8.22	0.966	-0.05	22	20.8	0.921	-0.119	22	14.7	-0.0839056	17.75	0.899	-0.154	22	6.9	0.914	-0.13	22	20.3	-0.141621	13.6	0.812	-0.3	22	14.2	0.851	-0.233	22	12.4	-0.266212	13.3	0	FALSE	FALSE	TRUE	FALSE	0.962	-0.056	22
P54136	Arginine--tRNA ligase, cytoplasmic OS=Homo sapiens GN=RARS PE=1 SV=2 - [SYRC_HUMAN]	RARS	3740.71	60	1	39	40	153	660	75.3	6.68	0.972	-0.041	152	25	1.031	0.044	152	30	0.00216242	27.5	0.925	-0.112	152	16.1	0.953	-0.069	152	17	-0.0908029	16.55	0.896	-0.158	152	16.2	0.967	-0.048	152	19.5	-0.102372	17.85	0	FALSE	FALSE	TRUE	FALSE	0.935	-0.097	152
O43324	Eukaryotic translation elongation factor 1 epsilon-1 OS=Homo sapiens GN=EEF1E1 PE=1 SV=1 - [MCA3_HUMAN]	EEF1E1	446.89	43.68	1	6	6	16	174	19.8	8.54	1.269	0.344	16	15.4	1.302	0.381	16	17.1	0.36233	16.25	0.904	-0.146	16	21.3	0.822	-0.283	16	13.7	-0.212568	17.5	1.02	0.029	16	17.1	1.046	0.065	16	18.1	0.0468403	17.6	6	FALSE	FALSE	TRUE	FALSE	0.956	-0.065	16
P49591	Serine--tRNA ligase, cytoplasmic OS=Homo sapiens GN=SARS PE=1 SV=3 - [SYSC_HUMAN]	SARS	2050.62	53.89	1	29	29	99	514	58.7	6.43	1.258	0.331	99	28.6	1.366	0.45	99	25.9	0.391768	27.25	1.024	0.034	99	16.5	1.003	0.004	99	16.5	0.0193461	16.5	1.329	0.41	99	17.7	1.415	0.501	99	21.9	0.45628	19.8	3	FALSE	FALSE	TRUE	FALSE	0.999	-0.001	99
P49589	Cysteine--tRNA ligase, cytoplasmic OS=Homo sapiens GN=CARS PE=1 SV=3 - [SYCC_HUMAN]	CARS	1429.34	39.84	1	25	25	74	748	85.4	6.76	0.99	-0.014	74	16.9	1.108	0.148	74	17	0.0690147	16.95	0.923	-0.116	74	18.3	0.861	-0.216	74	20.4	-0.164884	19.35	0.932	-0.102	74	16.1	0.949	-0.076	74	21.6	-0.0885002	18.85	0	FALSE	FALSE	TRUE	FALSE	0.948	-0.077	74
P26640	Valine--tRNA ligase OS=Homo sapiens GN=VARS PE=1 SV=4 - [SYVC_HUMAN]	VARS	2034.75	33.47	3	41	42	89	1264	140.4	7.59	1.066	0.092	87	26.1	1.103	0.141	87	33.3	0.11703	29.7	0.994	-0.009	87	19.3	0.953	-0.069	87	18.1	-0.0387471	18.7	1.073	0.102	87	21.7	1.016	0.023	87	23.5	0.0628125	22.6	0	FALSE	FALSE	TRUE	FALSE	1.014	0.02	87
P26639	Threonine--tRNA ligase, cytoplasmic OS=Homo sapiens GN=TARS PE=1 SV=3 - [SYTC_HUMAN]	TARS	3033.29	48.41	1	34	37	116	723	83.4	6.67	1.014	0.02	110	30.6	1.064	0.089	110	35.3	0.0551957	32.95	0.697	-0.521	110	24.1	0.78	-0.358	110	22.3	-0.43733	23.2	0.774	-0.37	110	34	0.829	-0.271	110	22.5	-0.319226	28.25	6	FALSE	FALSE	TRUE	FALSE	0.942	-0.086	110
O43776	Asparagine--tRNA ligase, cytoplasmic OS=Homo sapiens GN=NARS PE=1 SV=1 - [SYNC_HUMAN]	NARS	1204.63	41.24	1	24	24	75	548	62.9	6.25	1.018	0.026	75	34.2	1.131	0.178	75	38.9	0.103665	36.55	0.887	-0.173	75	17.7	0.87	-0.201	75	23.7	-0.186886	20.7	0.957	-0.063	75	22.6	0.998	-0.003	75	24.2	-0.0328314	23.4	0	FALSE	FALSE	TRUE	FALSE	0.978	-0.032	75
P49588	Alanine--tRNA ligase, cytoplasmic OS=Homo sapiens GN=AARS PE=1 SV=2 - [SYAC_HUMAN]	AARS	5095.98	58.88	1	58	58	182	968	106.7	5.53	0.996	-0.006	179	22.7	1.062	0.087	179	24.2	0.041243	23.45	0.944	-0.083	179	18.7	0.967	-0.048	179	22	-0.0656722	20.35	0.968	-0.047	179	16.2	1.041	0.058	179	21.2	0.00647756	18.7	0	FALSE	FALSE	TRUE	FALSE	0.947	-0.079	179
Q9NSD9	Phenylalanine--tRNA ligase beta subunit OS=Homo sapiens GN=FARSB PE=1 SV=3 - [SYFB_HUMAN]	FARSB	1142.11	46.18	1	25	26	68	589	66.1	6.84	0.935	-0.097	66	22.7	0.998	-0.003	66	27	-0.0491584	24.85	0.906	-0.142	66	15.8	0.903	-0.147	66	19.4	-0.144808	17.6	0.847	-0.24	66	16.8	0.901	-0.15	66	18.3	-0.194295	17.55	0	FALSE	FALSE	TRUE	FALSE	0.953	-0.069	66
Q9Y285	Phenylalanine--tRNA ligase alpha subunit OS=Homo sapiens GN=FARSA PE=1 SV=3 - [SYFA_HUMAN]	FARSA	1114.15	41.73	1	21	21	47	508	57.5	7.8	0.996	-0.006	45	30	1.059	0.083	45	48.4	0.0391384	39.2	0.922	-0.117	45	21.2	0.846	-0.241	45	27.7	-0.177882	24.45	0.894	-0.162	45	23.7	0.882	-0.181	45	30.2	-0.171368	26.95	0	FALSE	FALSE	TRUE	FALSE	0.966	-0.05	45
P12081	Histidine--tRNA ligase, cytoplasmic OS=Homo sapiens GN=HARS PE=1 SV=2 - [SYHC_HUMAN]	HARS	1611.99	45.97	1	27	32	94	509	57.4	5.88	1.03	0.043	85	30.3	1.127	0.172	85	34.8	0.109026	32.55	0.918	-0.123	85	21	0.946	-0.08	85	25.9	-0.101598	23.45	0.969	-0.045	85	19.5	1.031	0.044	85	22.3	0	20.9	0	FALSE	FALSE	TRUE	FALSE	0.973	-0.039	85
P54577	Tyrosine--tRNA ligase, cytoplasmic OS=Homo sapiens GN=YARS PE=1 SV=4 - [SYYC_HUMAN]	YARS	1763.74	64.96	1	39	39	99	528	59.1	7.05	0.973	-0.039	99	29.5	1.058	0.081	99	34	0.0221902	31.75	0.81	-0.304	99	22	0.754	-0.407	99	25.2	-0.354759	23.6	0.789	-0.342	99	22.1	0.877	-0.189	99	16.9	-0.263612	19.5	6	FALSE	FALSE	TRUE	FALSE	0.956	-0.065	99
P23381	Tryptophan--tRNA ligase, cytoplasmic OS=Homo sapiens GN=WARS PE=1 SV=2 - [SYWC_HUMAN]	WARS	2515.38	54.99	1	25	25	83	471	53.1	6.23	1.137	0.185	83	28.9	1.268	0.343	83	35.3	0.266037	32.1	0.864	-0.211	83	19.5	0.836	-0.258	83	19.3	-0.234465	19.4	0.979	-0.031	83	18.5	1.06	0.084	83	26	0.0278618	22.25	0	FALSE	FALSE	TRUE	FALSE	0.958	-0.062	83
P41250	Glycine--tRNA ligase OS=Homo sapiens GN=GARS PE=1 SV=3 - [SYG_HUMAN]	GARS	2280.31	62.25	1	39	40	100	739	83.1	7.03	1.294	0.372	98	30.1	1.411	0.497	98	30	0.435629	30.05	0.803	-0.317	98	21.6	0.77	-0.377	98	28.6	-0.346481	25.1	0.996	-0.006	98	24.5	1.07	0.098	98	22	0.0468403	23.25	6	FALSE	FALSE	TRUE	FALSE	0.967	-0.048	98
O94817	Ubiquitin-like protein ATG12 OS=Homo sapiens GN=ATG12 PE=1 SV=1 - [ATG12_HUMAN]	ATG12	59.21	7.86	1	1	1	2	140	15.1	5.1	0.975	-0.037	2	17.4	1.06	0.084	2	11.5	0.0250288	14.45	0.992	-0.012	2	7	0.983	-0.025	2	6.6	-0.0181473	6.8	0.959	-0.06	2	10.3	1.036	0.051	2	18.2	-0.00361125	14.25		FALSE	FALSE	FALSE		0.936	-0.095	2
Q9H1Y0	Autophagy protein 5 OS=Homo sapiens GN=ATG5 PE=1 SV=2 - [ATG5_HUMAN]	ATG5	118.22	20	1	4	4	6	275	32.4	5.77	0.87	-0.201	6	7.6	0.896	-0.158	6	3.2	-0.179515	5.4	1.029	0.041	6	18.1	1.109	0.149	6	6.8	0.0962619	12.45	0.912	-0.133	6	18.9	1.028	0.04	6	4	-0.0439433	11.45	0	FALSE	FALSE	TRUE	FALSE	0.926	-0.111	6
O14933	Ubiquitin/ISG15-conjugating enzyme E2 L6 OS=Homo sapiens GN=UBE2L6 PE=1 SV=4 - [UB2L6_HUMAN]	UBE2L6	189.87	26.8	1	3	3	7	153	17.8	7.88	1.139	0.188	7	8.7	1.138	0.187	7	7.7	0.187134	8.2	0.71	-0.494	7	6.6	0.794	-0.333	7	10.5	-0.411195	8.55	0.895	-0.16	7	32.3	0.916	-0.127	7	14.3	-0.143213	23.3	6	FALSE	FALSE	TRUE	FALSE	0.975	-0.037	7
P61086	Ubiquitin-conjugating enzyme E2 K OS=Homo sapiens GN=UBE2K PE=1 SV=3 - [UBE2K_HUMAN]	UBE2K	245.45	46.5	1	8	8	12	200	22.4	5.44	0.978	-0.032	11	18.6	1.021	0.03	11	14.8	-0.000721528	16.7	0.876	-0.191	11	6.9	0.916	-0.127	11	9.9	-0.158429	8.4	0.802	-0.318	11	14.5	0.901	-0.15	11	11.6	-0.231922	13.05	0	FALSE	FALSE	TRUE	FALSE	0.955	-0.066	11
Q92685	Dol-P-Man:Man(5)GlcNAc(2)-PP-Dol alpha-1,3-mannosyltransferase OS=Homo sapiens GN=ALG3 PE=1 SV=1 - [ALG3_HUMAN]	ALG3	74.54	2.74	1	1	1	1	438	50.1	9.44	0.917	-0.125	1	NA	1.157	0.21	1	NA	0.0524159	NA	1.061	0.085	1	NA	0.766	-0.385	1	NA	-0.130523	NA	0.964	-0.053	1	NA	0.882	-0.181	1	NA	-0.115597	NA		FALSE	FALSE	FALSE		1.115	0.157	1
Q6Y288	Beta-1,3-glucosyltransferase OS=Homo sapiens GN=B3GLCT PE=1 SV=2 - [B3GLT_HUMAN]	B3GLCT	204.3	8.03	1	3	3	6	498	56.5	7.5	1.126	0.171	6	13.5	1.016	0.023	6	31.6	0.0989585	22.55	1.022	0.031	6	9.4	0.745	-0.425	6	35.3	-0.178698	22.35	1.074	0.103	6	13.9	0.94	-0.089	6	9	0.0100637	11.45	0	FALSE	FALSE	TRUE	FALSE	1.069	0.096	6
Q9UKP4	A disintegrin and metalloproteinase with thrombospondin motifs 7 OS=Homo sapiens GN=ADAMTS7 PE=1 SV=2 - [ATS7_HUMAN]	ADAMTS7	49.65	1.01	1	1	1	1	1686	184	6.2	1.338	0.42	1	NA	1.317	0.397	1	NA	0.408712	NA	0.886	-0.175	1	NA	0.905	-0.144	1	NA	-0.159235	NA	1.175	0.233	1	NA	1.186	0.246	1	NA	0.239398	NA		FALSE	FALSE	FALSE		1.012	0.017	1
Q8TE58	A disintegrin and metalloproteinase with thrombospondin motifs 15 OS=Homo sapiens GN=ADAMTS15 PE=2 SV=1 - [ATS15_HUMAN]	ADAMTS15	20.12	1.16	1	1	1	1	950	103.2	8.57	0.739	-0.436	1	NA	0.969	-0.045	1	NA	-0.227692	NA	0.879	-0.186	1	NA	0.442	-1.178	1	NA	-0.59837	NA	0.644	-0.635	1	NA	0.426	-1.231	1	NA	-0.902389	NA		FALSE	FALSE	FALSE		1.137	0.185	1
Q6ZMP0	Thrombospondin type-1 domain-containing protein 4 OS=Homo sapiens GN=THSD4 PE=2 SV=2 - [THSD4_HUMAN]	THSD4	36.78	1.08	1	1	1	1	1018	112.4	7.65	2.162	1.112	1	NA	1.869	0.902	1	NA	1.01114	NA	0.707	-0.5	1	NA	0.654	-0.613	1	NA	-0.555333	NA	1.515	0.599	1	NA	1.216	0.282	1	NA	0.449429	NA		FALSE	FALSE	FALSE		0.998	-0.003	1
O75477	Erlin-1 OS=Homo sapiens GN=ERLIN1 PE=1 SV=1 - [ERLN1_HUMAN]	ERLIN1	330.77	22.83	1	6	8	12	346	38.9	7.87	0.863	-0.213	9	11.2	1.028	0.04	9	20.3	-0.0808506	15.75	1.168	0.224	9	10	0.781	-0.357	9	15.1	-0.0372659	12.55	0.958	-0.062	9	17	0.755	-0.405	9	28.5	-0.223475	22.75		FALSE	FALSE	TRUE	TRUE	1.179	0.238	9
P00450	Ceruloplasmin OS=Homo sapiens GN=CP PE=1 SV=1 - [CERU_HUMAN]	CP	1088.3	25.54	1	20	20	44	1065	122.1	5.72	1.046	0.065	44	23.7	0.976	-0.035	44	22.9	0.015783	23.3	0.868	-0.204	44	14.5	0.899	-0.154	44	14.3	-0.178698	14.4	0.898	-0.155	44	19.7	0.861	-0.216	44	16.5	-0.185245	18.1	0	FALSE	FALSE	TRUE	FALSE	0.944	-0.083	44
Q7Z449	Cytochrome P450 2U1 OS=Homo sapiens GN=CYP2U1 PE=1 SV=1 - [CP2U1_HUMAN]	CYP2U1	24.63	2.39	1	1	2	2	544	61.9	8.4	0.797	-0.327	1	NA	0.864	-0.211	1	NA	-0.267948	NA	0.97	-0.044	1	NA	0.898	-0.155	1	NA	-0.0985055	NA	0.767	-0.383	1	NA	0.772	-0.373	1	NA	-0.378007	NA		FALSE	FALSE	FALSE		0.99	-0.014	1
Q14376	UDP-glucose 4-epimerase OS=Homo sapiens GN=GALE PE=1 SV=2 - [GALE_HUMAN]	GALE	762.21	32.18	1	12	12	23	348	38.3	6.73	1.064	0.089	23	23.6	1.029	0.041	23	31.2	0.0655723	27.4	1.011	0.016	23	12.7	1.104	0.143	23	19.3	0.0806577	16	1.155	0.208	23	18.9	1.239	0.309	23	16.5	0.259423	17.7	0	FALSE	FALSE	TRUE	FALSE	0.951	-0.072	23
P51570	Galactokinase OS=Homo sapiens GN=GALK1 PE=1 SV=1 - [GALK1_HUMAN]	GALK1	447.47	43.88	1	14	14	20	392	42.2	6.46	1.023	0.033	17	24	0.99	-0.014	17	37.1	0.00934717	30.55	1.356	0.439	17	19.3	1.204	0.268	17	22.2	0.356144	20.75	1.158	0.212	17	39.7	1.124	0.169	17	22.5	0.190299	31.1	1	FALSE	FALSE	TRUE	FALSE	1.108	0.148	17
Q13724	Mannosyl-oligosaccharide glucosidase OS=Homo sapiens GN=MOGS PE=1 SV=5 - [MOGS_HUMAN]	MOGS	280.06	16.13	1	9	9	13	837	91.9	8.9	1.152	0.204	13	17.5	1.122	0.166	13	21.3	0.185232	19.4	1.186	0.246	13	15.4	0.977	-0.034	13	18.7	0.113034	17.05	1.397	0.482	13	9.4	1.162	0.217	13	10.8	0.35558	10.1	3	FALSE	FALSE	TRUE	FALSE	1.124	0.169	13
O75352	Mannose-P-dolichol utilization defect 1 protein OS=Homo sapiens GN=MPDU1 PE=1 SV=2 - [MPU1_HUMAN]	MPDU1	104.02	8.1	1	3	3	5	247	26.6	8.94	1.031	0.044	5	29.3	1.092	0.127	5	34.3	0.0861044	31.8	0.999	-0.001	5	22.6	0.955	-0.066	5	35	-0.0335695	28.8	0.984	-0.023	5	23.5	1.042	0.059	5	44.9	0.0186342	34.2	0	FALSE	FALSE	TRUE	FALSE	1.222	0.289	5
P43003	Excitatory amino acid transporter 1 OS=Homo sapiens GN=SLC1A3 PE=1 SV=1 - [EAA1_HUMAN]	SLC1A3	136.85	4.8	2	3	3	5	542	59.5	8.41	1.127	0.172	3	15.2	0.87	-0.201	3	20	-0.00216567	17.6	0.751	-0.413	3	2.6	1.034	0.048	3	9.2	-0.164076	5.9	0.824	-0.279	3	17.8	0.895	-0.16	3	34.7	-0.21843	26.25		FALSE	FALSE	TRUE	TRUE	1.196	0.258	3
O00400	Acetyl-coenzyme A transporter 1 OS=Homo sapiens GN=SLC33A1 PE=1 SV=1 - [ACATN_HUMAN]	SLC33A1	49.68	2	1	1	1	1	549	60.9	7.33	1.703	0.768	1	NA	1.774	0.827	1	NA	0.797843	NA	0.768	-0.381	1	NA	0.663	-0.593	1	NA	-0.482976	NA	1.296	0.374	1	NA	1.17	0.227	1	NA	0.302173	NA		FALSE	FALSE	FALSE		1.236	0.306	1
P11498	Pyruvate carboxylase, mitochondrial OS=Homo sapiens GN=PC PE=1 SV=2 - [PYC_HUMAN]	PC	490.31	17.23	3	14	15	22	1178	129.6	6.84	1.007	0.01	20	19.7	1.043	0.061	20	20.8	0.0356239	20.25	1.054	0.076	20	11	1.024	0.034	20	14.5	0.0551957	12.75	1.046	0.065	20	19.9	1.101	0.139	20	10.9	0.102322	15.4	0	FALSE	FALSE	TRUE	FALSE	1.03	0.043	20
P43251	Biotinidase OS=Homo sapiens GN=BTD PE=1 SV=2 - [BTD_HUMAN]	BTD	105.9	7.18	1	3	3	4	543	61.1	6.25	1.573	0.654	4	23.3	1.276	0.352	4	20	0.510456	21.65	0.911	-0.134	4	3.2	0.877	-0.189	4	16	-0.161653	9.6	1.379	0.464	4	21.2	0.995	-0.007	4	12.3	0.24732	16.75	3	FALSE	FALSE	TRUE	FALSE	1.031	0.044	4
Q9HCC0	Methylcrotonoyl-CoA carboxylase beta chain, mitochondrial OS=Homo sapiens GN=MCCC2 PE=1 SV=1 - [MCCB_HUMAN]	MCCC2	761.42	39.43	1	17	17	31	563	61.3	7.68	0.963	-0.054	31	15.8	0.991	-0.013	31	15.5	-0.0335695	15.65	0.965	-0.051	31	9.4	0.922	-0.117	31	13.5	-0.0839056	11.45	0.896	-0.158	31	16.8	0.888	-0.171	31	19.5	-0.164884	18.15	0	FALSE	FALSE	TRUE	FALSE	0.999	-0.001	31
Q96RQ3	Methylcrotonoyl-CoA carboxylase subunit alpha, mitochondrial OS=Homo sapiens GN=MCCC1 PE=1 SV=3 - [MCCA_HUMAN]	MCCC1	366.65	21.1	1	10	10	13	725	80.4	7.78	0.933	-0.1	13	23.1	0.895	-0.16	13	34.8	-0.129734	28.95	0.984	-0.023	13	15.4	0.989	-0.016	13	11.1	-0.019609	13.25	1.003	0.004	13	13.1	0.995	-0.007	13	18.6	-0.00144342	15.85	0	FALSE	FALSE	TRUE	FALSE	1.019	0.027	13
P50747	Biotin--protein ligase OS=Homo sapiens GN=HLCS PE=1 SV=1 - [BPL1_HUMAN]	HLCS	143.03	7.85	1	5	5	7	726	80.7	5.62	1.001	0.001	6	34.4	0.979	-0.031	6	43.2	-0.0144996	38.8	0.953	-0.069	6	11.2	1.146	0.197	6	32.5	0.0697022	21.85	0.877	-0.189	6	46.9	1.05	0.07	6	28.2	-0.0536434	37.55	0	FALSE	FALSE	TRUE	FALSE	0.948	-0.077	6
Q96EY8	Cob(I)yrinic acid a,c-diamide adenosyltransferase, mitochondrial OS=Homo sapiens GN=MMAB PE=1 SV=1 - [MMAB_HUMAN]	MMAB	497.21	41.6	1	8	8	12	250	27.4	8.6	0.806	-0.311	12	12.2	0.835	-0.26	12	8.4	-0.285425	10.3	0.881	-0.183	12	8.4	0.954	-0.068	12	10.2	-0.12422	9.3	0.768	-0.381	12	22.8	0.845	-0.243	12	16.1	-0.310254	19.45	4	FALSE	FALSE	TRUE	FALSE	1	0	12
Q9H3L0	Methylmalonic aciduria and homocystinuria type D protein, mitochondrial OS=Homo sapiens GN=MMADHC PE=1 SV=2 - [MMAD_HUMAN]	MMADHC	50.71	4.39	1	1	1	1	296	32.9	5.29	0.965	-0.051	1	NA	0.919	-0.122	1	NA	-0.086201	NA	0.817	-0.292	1	NA	0.934	-0.099	1	NA	-0.191821	NA	0.781	-0.357	1	NA	0.854	-0.228	1	NA	-0.290709	NA		FALSE	FALSE	FALSE		1.049	0.069	1
Q9NPF0	CD320 antigen OS=Homo sapiens GN=CD320 PE=1 SV=1 - [CD320_HUMAN]	CD320	28.31	3.19	1	1	1	1	282	29	4.75	0.908	-0.139	1	NA	0.98	-0.029	1	NA	-0.0831412	NA	0.974	-0.038	1	NA	0.824	-0.279	1	NA	-0.153607	NA	0.877	-0.189	1	NA	0.804	-0.315	1	NA	-0.25068	NA		FALSE	FALSE	FALSE		1.045	0.064	1
Q9UBK8	Methionine synthase reductase OS=Homo sapiens GN=MTRR PE=1 SV=3 - [MTRR_HUMAN]	MTRR	54.92	3.86	1	2	2	3	725	80.4	6.49	0.909	-0.138	3	1	0.836	-0.258	3	5.6	-0.196773	3.3	0.801	-0.32	3	3.5	0.936	-0.095	3	9.2	-0.203402	6.35	0.71	-0.494	3	2.4	0.732	-0.45	3	14.9	-0.471929	8.65	5	FALSE	FALSE	TRUE	FALSE	1.035	0.05	3
Q99707	Methionine synthase OS=Homo sapiens GN=MTR PE=1 SV=2 - [METH_HUMAN]	MTR	1086.89	28.54	1	28	28	47	1265	140.4	5.58	0.859	-0.219	47	23.4	0.881	-0.183	47	25.6	-0.200913	24.5	0.91	-0.136	47	15.6	0.962	-0.056	47	20.6	-0.0954196	18.1	0.78	-0.358	47	22.4	0.813	-0.299	47	20.5	-0.328254	21.45	4	FALSE	FALSE	TRUE	FALSE	0.959	-0.06	47
Q76N89	E3 ubiquitin-protein ligase HECW1 OS=Homo sapiens GN=HECW1 PE=1 SV=3 - [HECW1_HUMAN]	HECW1	31.84	1.62	2	2	2	2	1606	179.4	5.5	0.867	-0.206	2	7.6	0.739	-0.436	2	6.6	-0.316528	7.1	1.482	0.568	2	13.8	1.749	0.807	2	7.7	0.691981	10.75	1.273	0.348	2	6.1	1.285	0.362	2	1.2	0.355016	3.65		FALSE	FALSE	FALSE		1.096	0.132	2
Q53G59	Kelch-like protein 12 OS=Homo sapiens GN=KLHL12 PE=1 SV=2 - [KLH12_HUMAN]	KLHL12	32.31	2.46	1	1	1	1	568	63.2	5.44	0.941	-0.088	1	NA	1.094	0.13	1	NA	0.0250288	NA	1.075	0.104	1	NA	0.962	-0.056	1	NA	0.026446	NA	1.002	0.003	1	NA	1.047	0.066	1	NA	0.03492	NA		FALSE	FALSE	FALSE		0.907	-0.141	1
Q9NYF0	Dapper homolog 1 OS=Homo sapiens GN=DACT1 PE=1 SV=2 - [DACT1_HUMAN]	DACT1	22.46	1.32	1	1	1	1	836	90.1	8.69	1.121	0.165	1	NA	0.769	-0.379	1	NA	-0.0816138	NA	1.573	0.654	1	NA	2.01	1.007	1	NA	0.841168	NA	1.748	0.806	1	NA	1.538	0.621	1	NA	0.716332	NA		FALSE	FALSE	FALSE		1.322	0.403	1
P51649	Succinate-semialdehyde dehydrogenase, mitochondrial OS=Homo sapiens GN=ALDH5A1 PE=1 SV=2 - [SSDH_HUMAN]	ALDH5A1	540.07	26.92	1	12	12	18	535	57.2	8.28	1.025	0.036	18	26.4	1.037	0.052	18	18.3	0.0440443	22.35	1.162	0.217	18	15	1.199	0.262	18	15.2	0.239398	15.1	1.22	0.287	18	23.8	1.16	0.214	18	22.2	0.250962	23	0	FALSE	FALSE	TRUE	FALSE	1.028	0.04	18
P80404	4-aminobutyrate aminotransferase, mitochondrial OS=Homo sapiens GN=ABAT PE=1 SV=3 - [GABT_HUMAN]	ABAT	885.29	53.4	2	23	23	52	500	56.4	7.96	1.224	0.292	50	37.2	1.223	0.29	50	39.6	0.291014	38.4	1.247	0.318	50	21.2	1.323	0.404	50	17.8	0.361768	19.5	1.596	0.674	50	26.1	1.605	0.683	50	24.7	0.678523	25.4	1	FALSE	FALSE	TRUE	FALSE	1.02	0.029	50
P04632	Calpain small subunit 1 OS=Homo sapiens GN=CAPNS1 PE=1 SV=1 - [CPNS1_HUMAN]	CAPNS1	2565.28	64.93	1	12	12	59	268	28.3	5.2	0.975	-0.037	58	25.8	1.083	0.115	58	31.8	0.041243	28.8	0.959	-0.06	58	15.6	0.931	-0.103	58	20	-0.0816138	17.8	0.952	-0.071	58	24.9	1.076	0.106	58	21	0.0200577	22.95	0	FALSE	FALSE	TRUE	FALSE	1.003	0.004	58
P17655	Calpain-2 catalytic subunit OS=Homo sapiens GN=CAPN2 PE=1 SV=6 - [CAN2_HUMAN]	CAPN2	2462.98	67.43	1	41	41	100	700	79.9	4.98	1.057	0.08	100	41.6	1.156	0.209	100	42.7	0.146003	42.15	0.795	-0.331	100	22.8	0.851	-0.233	100	22.4	-0.281036	22.6	0.886	-0.175	100	23.3	1.006	0.009	100	23.6	-0.0800879	23.45	0	FALSE	FALSE	TRUE	FALSE	0.929	-0.106	100
P20810	Calpastatin OS=Homo sapiens GN=CAST PE=1 SV=4 - [ICAL_HUMAN]	CAST	1354.12	35.88	1	19	19	45	708	76.5	5.07	0.791	-0.338	45	18.7	0.878	-0.188	45	23.7	-0.261016	21.2	0.762	-0.392	45	15.8	0.743	-0.429	45	28	-0.410237	21.9	0.635	-0.655	45	22.3	0.704	-0.506	45	24.3	-0.578844	23.3	5	FALSE	FALSE	TRUE	FALSE	0.939	-0.091	45
Q9NNW7	Thioredoxin reductase 2, mitochondrial OS=Homo sapiens GN=TXNRD2 PE=1 SV=3 - [TRXR2_HUMAN]	TXNRD2	302.67	7.82	2	3	5	8	524	56.5	7.5	0.857	-0.223	3	11.1	0.865	-0.209	3	14.1	-0.215915	12.6	0.955	-0.066	3	17.9	0.945	-0.082	3	5.4	-0.0740006	11.65	0.812	-0.3	3	46.8	0.811	-0.302	3	0.4	-0.301337	23.6	4	FALSE	FALSE	TRUE	FALSE	0.997	-0.004	3
P30048	Thioredoxin-dependent peroxide reductase, mitochondrial OS=Homo sapiens GN=PRDX3 PE=1 SV=3 - [PRDX3_HUMAN]	PRDX3	1472.02	41.02	1	10	10	51	256	27.7	7.78	1.006	0.009	51	26.4	1.08	0.111	51	19.1	0.0607392	22.75	0.87	-0.201	51	14.6	0.853	-0.229	51	17.9	-0.215077	16.25	0.877	-0.189	51	17.9	0.883	-0.18	51	16.6	-0.184425	17.25	0	FALSE	FALSE	TRUE	FALSE	0.976	-0.035	51
Q8TED1	Probable glutathione peroxidase 8 OS=Homo sapiens GN=GPX8 PE=1 SV=2 - [GPX8_HUMAN]	GPX8	77.91	10.53	1	3	3	3	209	23.9	9.35	0.806	-0.311	3	18.9	0.991	-0.013	3	24.6	-0.15441	21.75	0.881	-0.183	3	0.3	0.621	-0.687	3	5.2	-0.413115	2.75	0.796	-0.329	3	18.5	0.696	-0.523	3	2	-0.422752	10.25	5	FALSE	FALSE	TRUE	FALSE	1.047	0.066	3
Q96SL4	Glutathione peroxidase 7 OS=Homo sapiens GN=GPX7 PE=1 SV=1 - [GPX7_HUMAN]	GPX7	20.98	12.83	1	1	1	1	187	21	8.27	1.351	0.434	1	NA	1.276	0.352	1	NA	0.393416	NA	0.813	-0.299	1	NA	0.815	-0.295	1	NA	-0.296899	NA	1.088	0.122	1	NA	1.034	0.048	1	NA	0.0854247	NA		FALSE	FALSE	FALSE		0.87	-0.201	1
P50583	Bis(5'-nucleosyl)-tetraphosphatase [asymmetrical] OS=Homo sapiens GN=NUDT2 PE=1 SV=3 - [AP4A_HUMAN]	NUDT2	202.94	59.86	1	7	7	10	147	16.8	5.35	0.804	-0.315	10	90.3	0.691	-0.533	10	55.2	-0.419855	72.75	0.998	-0.003	10	20.1	1.129	0.175	10	18.4	0.08882	19.25	0.758	-0.4	10	50.1	0.738	-0.438	10	38.4	-0.41889	44.25	4	FALSE	FALSE	TRUE	FALSE	1	0	10
O14618	Copper chaperone for superoxide dismutase OS=Homo sapiens GN=CCS PE=1 SV=1 - [CCS_HUMAN]	CCS	171.34	35.4	1	7	7	7	274	29	5.58	0.955	-0.066	7	32	0.863	-0.213	7	13.8	-0.137648	22.9	1.058	0.081	7	11.8	1.129	0.175	7	33.5	0.128953	22.65	1.147	0.198	7	17.9	1.102	0.14	7	30.3	0.169284	24.1	0	FALSE	FALSE	TRUE	FALSE	1.062	0.087	7
Q96HE7	ERO1-like protein alpha OS=Homo sapiens GN=ERO1A PE=1 SV=2 - [ERO1A_HUMAN]	ERO1A	468.6	42.31	2	15	15	22	468	54.4	5.68	1.293	0.371	22	27.5	1.298	0.376	22	33	0.373509	30.25	1.024	0.034	22	16.2	0.876	-0.191	22	28.1	-0.0740006	22.15	1.323	0.404	22	19.9	1.137	0.185	22	12.8	0.298658	16.35	3	FALSE	FALSE	TRUE	FALSE	1.042	0.059	22
Q99757	Thioredoxin, mitochondrial OS=Homo sapiens GN=TXN2 PE=1 SV=2 - [THIOM_HUMAN]	TXN2	69.03	9.04	1	1	1	4	166	18.4	8.29	0.932	-0.102	4	10.1	0.921	-0.119	4	12.1	-0.110137	11.1	1.063	0.088	4	11.5	0.958	-0.062	4	11.5	0.0150693	11.5	0.94	-0.089	4	4.4	0.862	-0.214	4	21.1	-0.150401	12.75	0	FALSE	FALSE	TRUE	FALSE	1.039	0.055	4
P49711	Transcriptional repressor CTCF OS=Homo sapiens GN=CTCF PE=1 SV=1 - [CTCF_HUMAN]	CTCF	153.57	3.58	2	2	2	3	727	82.7	6.96	0.858	-0.221	3	2.2	1.472	0.558	3	9.3	0.22033	5.75	1.259	0.332	3	3.6	0.786	-0.347	3	1	0.0321008	2.3	1.055	0.077	3	5.8	1.081	0.112	3	18.9	0.0949116	12.35		FALSE	FALSE	TRUE	TRUE	1.014	0.02	3
P55347	Homeobox protein PKNOX1 OS=Homo sapiens GN=PKNOX1 PE=1 SV=3 - [PKNX1_HUMAN]	PKNOX1	67.81	5.96	2	2	2	2	436	47.6	4.91	0.844	-0.245	2	3.3	0.838	-0.255	2	10.5	-0.249822	6.9	0.909	-0.138	2	1.7	1.03	0.043	2	2.7	-0.0446872	2.2	0.76	-0.396	2	5	0.858	-0.221	2	7.7	-0.305788	6.35		FALSE	FALSE	FALSE		0.921	-0.119	2
Q6ZW49	PAX-interacting protein 1 OS=Homo sapiens GN=PAXIP1 PE=1 SV=2 - [PAXI1_HUMAN]	PAXIP1	121.61	3.84	1	3	3	4	1069	121.3	6.7	0.932	-0.102	4	6.9	0.977	-0.034	4	9.1	-0.0671829	8	1.006	0.009	4	7.1	0.9	-0.152	4	1.5	-0.0694519	4.3	0.951	-0.072	4	3.9	0.858	-0.221	4	5.8	-0.144808	4.85	0	FALSE	FALSE	TRUE	FALSE	1.011	0.016	4
P16333	Cytoplasmic protein NCK1 OS=Homo sapiens GN=NCK1 PE=1 SV=1 - [NCK1_HUMAN]	NCK1	306.22	22.28	1	7	10	16	377	42.8	6.47	0.813	-0.299	11	14	0.859	-0.219	11	17.7	-0.258425	15.85	0.971	-0.042	11	21	1.044	0.062	11	10.4	0.0107798	15.7	0.836	-0.258	11	7	0.896	-0.158	11	16.4	-0.207561	11.7	0	FALSE	FALSE	TRUE	FALSE	0.953	-0.069	11
Q13485	Mothers against decapentaplegic homolog 4 OS=Homo sapiens GN=SMAD4 PE=1 SV=1 - [SMAD4_HUMAN]	SMAD4	191.01	11.41	1	6	6	9	552	60.4	6.99	0.935	-0.097	9	8.7	0.915	-0.128	9	29.4	-0.112475	19.05	0.962	-0.056	9	7.9	0.993	-0.01	9	13.1	-0.0328314	10.5	0.861	-0.216	9	24.5	0.891	-0.167	9	34.2	-0.190997	29.35	0	FALSE	FALSE	TRUE	FALSE	0.962	-0.056	9
P13645	Keratin, type I cytoskeletal 10 OS=Homo sapiens GN=KRT10 PE=1 SV=6 - [K1C10_HUMAN]	KRT10	720.22	31.34	6	10	14	25	584	58.8	5.21	1.357	0.44	19	30.5	0.719	-0.476	19	26	0.0538064	28.25	0.687	-0.542	19	36	0.676	-0.565	19	59.3	-0.553214	47.65	0.909	-0.138	19	14.9	0.43	-1.218	19	61.4	-0.578844	38.15		FALSE	TRUE	TRUE	FALSE	1.637	0.711	19
P35908	Keratin, type II cytoskeletal 2 epidermal OS=Homo sapiens GN=KRT2 PE=1 SV=2 - [K22E_HUMAN]	KRT2	506.55	20.66	5	8	11	19	639	65.4	8	1.823	0.866	13	21.1	0.808	-0.308	13	24.5	0.395611	22.8	0.526	-0.927	13	12.4	0.55	-0.862	13	21.3	-0.894322	16.85	0.898	-0.155	13	13.8	0.38	-1.396	13	32	-0.646112	22.9		FALSE	TRUE	TRUE	FALSE	1.8	0.848	13
Q674X7	Kazrin OS=Homo sapiens GN=KAZN PE=1 SV=2 - [KAZRN_HUMAN]	KAZN	87.27	3.74	1	3	3	4	775	86.3	7.03	1.184	0.244	4	11.8	0.939	-0.091	4	5.1	0.0861044	8.45	1.306	0.385	4	8.7	1.639	0.713	4	9.5	0.558268	9.1	1.564	0.645	4	22.4	1.436	0.522	4	17.8	0.584963	20.1	1	FALSE	FALSE	TRUE	FALSE	1.093	0.128	4
Q99959	Plakophilin-2 OS=Homo sapiens GN=PKP2 PE=1 SV=2 - [PKP2_HUMAN]	PKP2	205.2	11.24	3	8	9	10	881	97.4	9.33	0.877	-0.189	9	12.2	0.749	-0.417	9	13.1	-0.298673	12.65	0.783	-0.353	9	26.2	0.762	-0.392	9	14.7	-0.372393	20.45	0.681	-0.554	9	17.9	0.601	-0.735	9	25	-0.641604	21.45	5	FALSE	FALSE	TRUE	FALSE	1.108	0.148	9
P08727	Keratin, type I cytoskeletal 19 OS=Homo sapiens GN=KRT19 PE=1 SV=4 - [K1C19_HUMAN]	KRT19	144.35	20	2	6	8	9	400	44.1	5.14	1.453	0.539	6	16	1.964	0.974	6	31.9	0.77273	23.95	0.762	-0.392	6	2.5	0.64	-0.644	6	16	-0.512514	9.25	1.122	0.166	6	9.4	1.258	0.331	6	13.7	0.250962	11.55		FALSE	TRUE	TRUE	FALSE	0.944	-0.083	6
P35527	Keratin, type I cytoskeletal 9 OS=Homo sapiens GN=KRT9 PE=1 SV=3 - [K1C9_HUMAN]	KRT9	1183.93	35.63	1	14	16	41	623	62	5.24	0.883	-0.18	38	25.4	1.028	0.04	38	44.2	-0.0656722	34.8	1.262	0.336	38	18.9	0.234	-2.095	37	90.9	-0.41889	54.9	1.03	0.043	38	21.8	0.221	-2.178	37	79.4	-0.676918	50.6		FALSE	TRUE	TRUE	FALSE	2.354	1.235	38
P05783	Keratin, type I cytoskeletal 18 OS=Homo sapiens GN=KRT18 PE=1 SV=2 - [K1C18_HUMAN]	KRT18	2725.97	78.14	3	36	37	83	430	48	5.45	0.918	-0.123	82	38.5	0.992	-0.012	82	23	-0.0664274	30.75	0.723	-0.468	82	30.8	0.699	-0.517	82	25.3	-0.492079	28.05	0.714	-0.486	82	50	0.738	-0.438	82	37.7	-0.461959	43.85		FALSE	TRUE	TRUE	FALSE	0.932	-0.102	82
P08779	Keratin, type I cytoskeletal 16 OS=Homo sapiens GN=KRT16 PE=1 SV=4 - [K1C16_HUMAN]	KRT16	179.39	12.9	7	3	6	8	473	51.2	5.05	1.178	0.236	3	61.5	0.733	-0.448	3	32	-0.0656722	46.75	1.11	0.151	3	0.2	1.005	0.007	3	3.4	0.0806577	1.8	1.299	0.377	3	19.4	0.734	-0.446	3	35.7	0.0236102	27.55		FALSE	TRUE	TRUE	FALSE	1.21	0.275	3
P05787	Keratin, type II cytoskeletal 8 OS=Homo sapiens GN=KRT8 PE=1 SV=7 - [K2C8_HUMAN]	KRT8	3001.5	67.08	12	40	45	169	483	53.7	5.59	0.937	-0.094	123	34.3	1.046	0.065	123	29.2	-0.0123153	31.75	0.682	-0.552	123	32.6	0.661	-0.597	123	28.8	-0.574541	30.7	0.653	-0.615	123	30.3	0.704	-0.506	123	22.8	-0.559579	26.55		FALSE	TRUE	TRUE	FALSE	0.929	-0.106	123
Q99569	Plakophilin-4 OS=Homo sapiens GN=PKP4 PE=1 SV=2 - [PKP4_HUMAN]	PKP4	81.91	2.94	1	2	3	3	1192	131.8	8.94	1.134	0.181	2	27.6	1.117	0.16	2	13.7	0.170566	20.65	0.959	-0.06	2	7.2	0.921	-0.119	2	18.9	-0.0892673	13.05	1.078	0.108	2	20.1	1.024	0.034	2	33.3	0.0717627	26.7		FALSE	FALSE	FALSE		1.016	0.023	2
O95372	Acyl-protein thioesterase 2 OS=Homo sapiens GN=LYPLA2 PE=1 SV=1 - [LYPA2_HUMAN]	LYPLA2	890.87	39.39	1	9	9	38	231	24.7	7.23	0.985	-0.022	38	20	1.04	0.057	38	17.8	0.0179219	18.9	1.218	0.285	38	12.1	1.337	0.419	38	11.8	0.353323	11.95	1.272	0.347	38	12.2	1.433	0.519	38	12.7	0.435629	12.45	1	FALSE	FALSE	TRUE	FALSE	0.973	-0.039	38
P17677	Neuromodulin OS=Homo sapiens GN=GAP43 PE=1 SV=1 - [NEUM_HUMAN]	GAP43	2778.61	76.89	1	14	14	73	238	24.8	4.72	1.01	0.014	67	24.6	1.134	0.181	67	26.7	0.100305	25.65	1.752	0.809	67	18.4	1.893	0.921	67	25.7	0.865919	22.05	1.821	0.865	67	14.8	2.116	1.081	67	22.2	0.977097	18.5	2	FALSE	FALSE	TRUE	FALSE	0.976	-0.035	67
Q13740	CD166 antigen OS=Homo sapiens GN=ALCAM PE=1 SV=2 - [CD166_HUMAN]	ALCAM	344.71	15.44	1	7	7	14	583	65.1	6.25	1.024	0.034	14	39.4	0.902	-0.149	14	23.2	-0.0543923	31.3	0.866	-0.208	14	6.5	0.82	-0.286	14	20	-0.246395	13.25	0.899	-0.154	14	43.5	0.793	-0.335	14	36.3	-0.24127	39.9	0	FALSE	FALSE	TRUE	FALSE	0.983	-0.025	14
O00533	Neural cell adhesion molecule L1-like protein OS=Homo sapiens GN=CHL1 PE=1 SV=4 - [NCHL1_HUMAN]	CHL1	124.17	4.3	1	4	5	6	1208	135	5.76	0.869	-0.203	5	33.8	0.79	-0.34	5	3.1	-0.269686	18.45	2.37	1.245	5	42.1	2.768	1.469	5	6.9	1.36121	24.5	1.996	0.997	5	17.5	2.169	1.117	5	1.3	1.05832	9.4	2	FALSE	FALSE	TRUE	FALSE	1.008	0.011	5
O43602	Neuronal migration protein doublecortin OS=Homo sapiens GN=DCX PE=1 SV=4 - [DCX_HUMAN]	DCX	3842.78	64.93	1	25	30	145	365	40.5	9.28	1.457	0.543	117	38.6	1.253	0.325	117	33.7	0.438293	36.15	2.832	1.502	117	42.9	3.033	1.601	117	33.3	1.55213	38.1	4.021	2.008	117	71.4	3.819	1.933	117	55.2	1.97085	63.3	2	FALSE	FALSE	TRUE	FALSE	1.115	0.157	117
A0MZ66	Shootin-1 OS=Homo sapiens GN=SHTN1 PE=1 SV=4 - [SHOT1_HUMAN]	SHTN1	1825.07	49.29	1	30	31	87	631	71.6	5.33	1.061	0.085	84	23.5	1.046	0.065	84	23.8	0.0751903	23.65	1.117	0.16	84	16.3	1.159	0.213	84	16.8	0.186501	16.55	1.14	0.189	84	16.6	1.203	0.267	84	17.9	0.228357	17.25	0	FALSE	FALSE	TRUE	FALSE	0.988	-0.017	84
O75676	Ribosomal protein S6 kinase alpha-4 OS=Homo sapiens GN=RPS6KA4 PE=1 SV=1 - [KS6A4_HUMAN]	RPS6KA4	31.19	2.33	1	2	2	3	772	85.6	8.28	1.278	0.354	3	0.9	1.038	0.054	3	3.5	0.211635	2.2	1.073	0.102	3	47.7	0.757	-0.402	3	4.5	-0.128156	26.1	1.359	0.443	3	13.8	0.787	-0.346	3	1	0.10165	7.4		FALSE	FALSE	TRUE	TRUE	1.45	0.536	3
P35241	Radixin OS=Homo sapiens GN=RDX PE=1 SV=1 - [RADI_HUMAN]	RDX	2933.99	59.52	1	28	48	165	583	68.5	6.37	0.972	-0.041	81	17.9	0.965	-0.051	81	23.5	-0.046176	20.7	1.053	0.075	81	17.9	1.131	0.178	81	17.2	0.126973	17.55	1.045	0.064	81	14.9	1.146	0.197	81	19.7	0.131589	17.3	0	FALSE	FALSE	TRUE	FALSE	0.947	-0.079	81
Q15528	Mediator of RNA polymerase II transcription subunit 22 OS=Homo sapiens GN=MED22 PE=1 SV=2 - [MED22_HUMAN]	MED22	193.46	46	1	10	10	12	200	22.2	4.68	0.9	-0.152	12	24	0.825	-0.278	12	24.4	-0.213404	24.2	1.069	0.096	12	9.9	1.165	0.22	12	17.1	0.159629	13.5	0.979	-0.031	12	15.2	0.992	-0.012	12	15.1	-0.0210722	15.15	0	FALSE	FALSE	TRUE	FALSE	0.987	-0.019	12
Q71F56	Mediator of RNA polymerase II transcription subunit 13-like OS=Homo sapiens GN=MED13L PE=1 SV=1 - [MD13L_HUMAN]	MED13L	73.21	1	1	2	2	3	2210	242.4	6.04	1.193	0.255	3	13.5	1.036	0.051	3	15	0.156397	14.25	1.277	0.353	3	4.6	1.073	0.102	3	0.5	0.232661	2.55	1.345	0.428	3	3	1.073	0.102	3	10.5	0.273814	6.75	0	FALSE	FALSE	TRUE	FALSE	1.08	0.111	3
Q9NWA0	Mediator of RNA polymerase II transcription subunit 9 OS=Homo sapiens GN=MED9 PE=1 SV=1 - [MED9_HUMAN]	MED9	63.71	13.01	1	2	2	3	146	16.4	7.39	0.807	-0.309	2	3.9	0.83	-0.269	2	7.2	-0.288946	5.55	0.903	-0.147	2	1.6	0.902	-0.149	2	2.3	-0.148001	1.95	0.723	-0.468	2	5.5	0.745	-0.425	2	4.9	-0.446148	5.2		FALSE	FALSE	FALSE		0.955	-0.066	2
Q9BUE0	Mediator of RNA polymerase II transcription subunit 18 OS=Homo sapiens GN=MED18 PE=1 SV=1 - [MED18_HUMAN]	MED18	67.53	13.46	1	3	3	5	208	23.6	6.54	0.977	-0.034	5	5.5	0.977	-0.034	5	2.4	-0.0335695	3.95	0.983	-0.025	5	7.4	1.046	0.065	5	4.4	0.0207689	5.9	0.905	-0.144	5	15	0.987	-0.019	5	29	-0.0800879	22	0	FALSE	FALSE	TRUE	FALSE	0.957	-0.063	5
Q9NX70	Mediator of RNA polymerase II transcription subunit 29 OS=Homo sapiens GN=MED29 PE=1 SV=1 - [MED29_HUMAN]	MED29	106.72	22	1	4	4	4	200	21.1	6.29	0.926	-0.111	4	17.5	0.774	-0.37	4	15.2	-0.234465	16.35	1.034	0.048	4	16.3	0.852	-0.231	4	55	-0.0846703	35.65	0.851	-0.233	4	8	0.859	-0.219	4	14.5	-0.226004	11.25	0	FALSE	FALSE	TRUE	FALSE	1.06	0.084	4
Q9H204	Mediator of RNA polymerase II transcription subunit 28 OS=Homo sapiens GN=MED28 PE=1 SV=1 - [MED28_HUMAN]	MED28	40.53	25.84	1	5	5	6	178	19.5	5.58	1.006	0.009	6	13.9	0.854	-0.228	6	9.2	-0.104697	11.55	1.039	0.055	6	6.2	1.002	0.003	6	8.8	0.0292762	7.5	1.101	0.139	6	14.1	0.956	-0.065	6	19.8	0.0405418	16.95	0	FALSE	FALSE	TRUE	FALSE	1.067	0.094	6
Q96EK7	Constitutive coactivator of peroxisome proliferator-activated receptor gamma OS=Homo sapiens GN=FAM120B PE=1 SV=1 - [F120B_HUMAN]	FAM120B	60.15	5.27	1	4	4	4	910	103.7	5.69	1.162	0.217	4	16.5	1.142	0.192	4	24.8	0.204141	20.65	1.007	0.01	4	12.5	1.211	0.276	4	16.3	0.149259	14.4	1.118	0.161	4	11	1.239	0.309	4	15.8	0.236952	13.4	0	FALSE	FALSE	TRUE	FALSE	0.985	-0.022	4
A0JLT2	Mediator of RNA polymerase II transcription subunit 19 OS=Homo sapiens GN=MED19 PE=1 SV=2 - [MED19_HUMAN]	MED19	138.12	24.59	1	3	3	4	244	26.3	9.82	1.006	0.009	4	5	0.93	-0.105	4	5.9	-0.046921	5.45	1.034	0.048	4	9.5	0.901	-0.15	4	7.9	-0.0476664	8.7	1.014	0.02	4	17	0.843	-0.246	4	7.6	-0.107026	12.3	0	FALSE	FALSE	TRUE	FALSE	1.093	0.128	4
Q9Y2W1	Thyroid hormone receptor-associated protein 3 OS=Homo sapiens GN=THRAP3 PE=1 SV=2 - [TR150_HUMAN]	THRAP3	1747.76	34.55	1	33	34	86	955	108.6	10.15	1.168	0.224	84	37.1	1.16	0.214	84	31.5	0.219091	34.3	0.939	-0.091	84	21.7	0.909	-0.138	84	24.4	-0.114035	23.05	1.213	0.279	84	25	1.148	0.199	84	18.7	0.239398	21.85	0	FALSE	FALSE	TRUE	FALSE	0.997	-0.004	84
Q13503	Mediator of RNA polymerase II transcription subunit 21 OS=Homo sapiens GN=MED21 PE=1 SV=1 - [MED21_HUMAN]	MED21	132.24	9.72	1	1	1	2	144	15.6	4.45	0.775	-0.368	2	8.1	0.876	-0.191	2	14.4	-0.27666	11.25	0.925	-0.112	2	3.7	0.942	-0.086	2	3	-0.0992781	3.35	0.711	-0.492	2	4.4	0.821	-0.285	2	17.5	-0.384584	10.95		FALSE	FALSE	FALSE		0.967	-0.048	2
Q9P086	Mediator of RNA polymerase II transcription subunit 11 OS=Homo sapiens GN=MED11 PE=1 SV=2 - [MED11_HUMAN]	MED11	35.33	11.11	1	2	2	3	117	13.1	5.96	0.872	-0.198	3	5.2	0.887	-0.173	3	0.6	-0.185245	2.9	1.01	0.014	3	7.1	1.163	0.218	3	0.6	0.119688	3.85	0.842	-0.248	3	1.8	1.022	0.031	3	1.2	-0.101598	1.5	0	FALSE	FALSE	TRUE	FALSE	0.925	-0.112	3
O60271	C-Jun-amino-terminal kinase-interacting protein 4 OS=Homo sapiens GN=SPAG9 PE=1 SV=4 - [JIP4_HUMAN]	SPAG9	1567.33	29.67	1	27	32	64	1321	146.1	5.15	1.023	0.033	56	21.3	1.046	0.065	56	23.7	0.0489336	22.5	1.028	0.04	56	12.4	1.035	0.05	56	19.4	0.0447438	15.9	1.058	0.081	56	19.3	1.1	0.138	56	17.6	0.109695	18.45	0	FALSE	FALSE	TRUE	FALSE	0.966	-0.05	56
Q12982	BCL2/adenovirus E1B 19 kDa protein-interacting protein 2 OS=Homo sapiens GN=BNIP2 PE=1 SV=1 - [BNIP2_HUMAN]	BNIP2	19.9	3.5	1	1	1	1	314	36	4.81	0.869	-0.203	1	NA	0.886	-0.175	1	NA	-0.188529	NA	1.04	0.057	1	NA	0.969	-0.045	1	NA	0.00647756	NA	0.896	-0.158	1	NA	0.854	-0.228	1	NA	-0.192645	NA		FALSE	FALSE	FALSE		1.082	0.114	1
P26232	Catenin alpha-2 OS=Homo sapiens GN=CTNNA2 PE=1 SV=5 - [CTNA2_HUMAN]	CTNNA2	1341.42	39.98	1	18	33	53	953	105.2	5.71	1.091	0.126	24	32.6	0.952	-0.071	24	27.5	0.0306892	30.05	2.418	1.274	24	42.5	2.853	1.512	24	46.7	1.39808	44.6	2.556	1.354	24	55.3	2.673	1.418	24	40.4	1.38654	47.85	2	FALSE	FALSE	TRUE	FALSE	1.089	0.123	24
Q8TEY7	Ubiquitin carboxyl-terminal hydrolase 33 OS=Homo sapiens GN=USP33 PE=1 SV=2 - [UBP33_HUMAN]	USP33	39.85	1.27	1	1	1	1	942	106.7	6.02	1.122	0.166	1	NA	1.079	0.11	1	NA	0.138159	NA	0.931	-0.103	1	NA	0.978	-0.032	1	NA	-0.0671829	NA	1.036	0.051	1	NA	1.049	0.069	1	NA	0.0600474	NA		FALSE	FALSE	FALSE		0.984	-0.023	1
Q99435	Protein kinase C-binding protein NELL2 OS=Homo sapiens GN=NELL2 PE=1 SV=1 - [NELL2_HUMAN]	NELL2	29.71	1.23	1	1	1	1	816	91.3	5.73	1.087	0.12	1	NA	1.44	0.526	1	NA	0.337426	NA	0.792	-0.336	1	NA	0.771	-0.375	1	NA	-0.355682	NA	0.853	-0.229	1	NA	1.104	0.143	1	NA	-0.0313562	NA		FALSE	FALSE	FALSE		0.849	-0.236	1
Q9UJQ4	Sal-like protein 4 OS=Homo sapiens GN=SALL4 PE=1 SV=1 - [SALL4_HUMAN]	SALL4	37	1.14	1	1	1	1	1053	112.2	7.47	1.046	0.065	1	NA	1.174	0.231	1	NA	0.15056	NA	0.764	-0.388	1	NA	0.655	-0.61	1	NA	-0.495125	NA	0.792	-0.336	1	NA	0.765	-0.386	1	NA	-0.361231	NA		FALSE	FALSE	FALSE		1.048	0.068	1
Q9NR12	PDZ and LIM domain protein 7 OS=Homo sapiens GN=PDLIM7 PE=1 SV=1 - [PDLI7_HUMAN]	PDLIM7	992.13	60.18	1	21	21	51	457	49.8	8.41	1.017	0.024	51	21.7	1.046	0.065	51	25.7	0.0447438	23.7	0.738	-0.438	51	16.8	0.726	-0.462	51	18	-0.450084	17.4	0.753	-0.409	51	29.1	0.785	-0.349	51	22.7	-0.378944	25.9	5	FALSE	FALSE	TRUE	FALSE	0.998	-0.003	51
Q9HCK4	Roundabout homolog 2 OS=Homo sapiens GN=ROBO2 PE=1 SV=2 - [ROBO2_HUMAN]	ROBO2	39.97	1.16	1	2	2	2	1378	151.1	6.33	1.088	0.122	2	12.7	0.97	-0.044	2	6	0.041243	9.35	1.78	0.832	2	7.5	1.867	0.901	2	11.6	0.86671	9.55	1.919	0.94	2	5.2	1.803	0.85	2	5.5	0.896078	5.35		FALSE	FALSE	FALSE		1.084	0.116	2
P42684	Abelson tyrosine-protein kinase 2 OS=Homo sapiens GN=ABL2 PE=1 SV=1 - [ABL2_HUMAN]	ABL2	43.9	1.78	1	1	2	2	1182	128.3	8.07	0.905	-0.144	1	NA	0.925	-0.112	1	NA	-0.128156	NA	1.213	0.279	1	NA	1.262	0.336	1	NA	0.307429	NA	1.089	0.123	1	NA	1.162	0.217	1	NA	0.170566	NA		FALSE	FALSE	FALSE		1.03	0.043	1
P40123	Adenylyl cyclase-associated protein 2 OS=Homo sapiens GN=CAP2 PE=1 SV=1 - [CAP2_HUMAN]	CAP2	1585.46	48.64	1	18	20	85	477	52.8	6.37	0.89	-0.168	76	17.7	0.889	-0.17	76	22.3	-0.168933	20	0.874	-0.194	76	14.9	0.87	-0.201	76	19.2	-0.1976	17.05	0.75	-0.415	76	21.8	0.805	-0.313	76	21.9	-0.363085	21.85	5	FALSE	FALSE	TRUE	FALSE	0.968	-0.047	76
Q7Z6B7	SLIT-ROBO Rho GTPase-activating protein 1 OS=Homo sapiens GN=SRGAP1 PE=1 SV=1 - [SRGP1_HUMAN]	SRGAP1	561.64	24.24	1	17	21	28	1085	124.2	6.83	1.089	0.123	24	14.5	1.027	0.038	24	23.2	0.0813396	18.85	1.043	0.061	24	10.7	1.092	0.127	24	17	0.0942361	13.85	1.126	0.171	24	20.7	1.054	0.076	24	20.2	0.124328	20.45	0	FALSE	FALSE	TRUE	FALSE	1.009	0.013	24
O43295	SLIT-ROBO Rho GTPase-activating protein 3 OS=Homo sapiens GN=SRGAP3 PE=1 SV=3 - [SRGP3_HUMAN]	SRGAP3	264.72	9.92	1	7	9	10	1099	124.4	6.68	1.034	0.048	8	20.9	0.908	-0.139	8	15.1	-0.0424568	18	1.427	0.513	8	12	1.543	0.626	8	19.4	0.570463	15.7	1.612	0.689	8	14	1.449	0.535	8	30.4	0.614003	22.2	1	FALSE	FALSE	TRUE	FALSE	0.969	-0.045	8
Q9C0H5	Rho GTPase-activating protein 39 OS=Homo sapiens GN=ARHGAP39 PE=1 SV=2 - [RHG39_HUMAN]	ARHGAP39	22.48	1.02	1	1	1	1	1083	121.2	7.5	0.891	-0.167	1	NA	0.84	-0.252	1	NA	-0.208394	NA	1.324	0.405	1	NA	1.426	0.512	1	NA	0.459432	NA	1.168	0.224	1	NA	1.192	0.253	1	NA	0.238787	NA		FALSE	FALSE	FALSE		1.055	0.077	1
P53778	Mitogen-activated protein kinase 12 OS=Homo sapiens GN=MAPK12 PE=1 SV=3 - [MK12_HUMAN]	MAPK12	261.61	23.43	5	6	7	10	367	41.9	6.39	0.9	-0.152	8	14.2	1.001	0.001	8	7.9	-0.0732415	11.05	1.018	0.026	8	11.6	1.064	0.089	8	5.1	0.0579701	8.35	0.988	-0.017	8	16.5	1.058	0.081	8	6.7	0.0328061	11.6	0	FALSE	FALSE	TRUE	FALSE	0.966	-0.05	8
O96013	Serine/threonine-protein kinase PAK 4 OS=Homo sapiens GN=PAK4 PE=1 SV=1 - [PAK4_HUMAN]	PAK4	195.99	21.32	2	9	10	12	591	64	9.73	1.139	0.188	11	10.9	0.998	-0.003	11	22.9	0.0955869	16.9	0.999	-0.001	11	13.3	1.12	0.163	11	25.7	0.0833836	19.5	1.149	0.2	11	16.6	0.992	-0.012	11	20.9	0.0982848	18.75	0	FALSE	FALSE	TRUE	FALSE	1.131	0.178	11
A7E2V4	Zinc finger SWIM domain-containing protein 8 OS=Homo sapiens GN=ZSWIM8 PE=1 SV=1 - [ZSWM8_HUMAN]	ZSWIM8	303.98	4.03	1	5	5	7	1837	197.2	6.8	0.994	-0.009	7	19.7	1.006	0.009	7	30.1	0	24.9	1.119	0.162	7	3.3	1.105	0.144	7	13.8	0.153157	8.55	1.058	0.081	7	14.3	1.047	0.066	7	24.6	0.0738202	19.45	0	FALSE	FALSE	TRUE	FALSE	0.956	-0.065	7
P50458	LIM/homeobox protein Lhx2 OS=Homo sapiens GN=LHX2 PE=2 SV=2 - [LHX2_HUMAN]	LHX2	43.04	2.96	1	1	1	1	406	44.3	8.48	0.95	-0.074	1	NA	1.002	0.003	1	NA	-0.0350469	NA	0.776	-0.366	1	NA	0.674	-0.569	1	NA	-0.463947	NA	0.731	-0.452	1	NA	0.672	-0.573	1	NA	-0.511485	NA		FALSE	FALSE	FALSE		0.988	-0.017	1
O43347	RNA-binding protein Musashi homolog 1 OS=Homo sapiens GN=MSI1 PE=1 SV=1 - [MSI1H_HUMAN]	MSI1	1903.05	55.8	1	15	18	62	362	39.1	7.85	0.988	-0.017	57	18.8	1.035	0.05	57	21.1	0.0164963	19.95	0.694	-0.527	57	27.6	0.697	-0.521	57	34	-0.523878	30.8	0.673	-0.571	57	27.2	0.664	-0.591	57	27.6	-0.581001	27.4	5	FALSE	FALSE	TRUE	FALSE	0.927	-0.109	57
Q15796	Mothers against decapentaplegic homolog 2 OS=Homo sapiens GN=SMAD2 PE=1 SV=1 - [SMAD2_HUMAN]	SMAD2	463.03	23.98	1	8	11	19	467	52.3	6.58	1.059	0.083	15	23.6	1	0	15	29.8	0.0419438	26.7	1.136	0.184	15	12.3	0.975	-0.037	15	17	0.0779266	14.65	1.115	0.157	15	13.3	0.985	-0.022	15	18.9	0.0703893	16.1	0	FALSE	FALSE	TRUE	FALSE	1.039	0.055	15
Q9H9Z2	Protein lin-28 homolog A OS=Homo sapiens GN=LIN28A PE=1 SV=1 - [LN28A_HUMAN]	LIN28A	146.53	13.88	1	2	2	4	209	22.7	8.07	0.888	-0.171	4	7.8	0.882	-0.181	4	12.2	-0.176251	10	0.771	-0.375	4	29.9	0.952	-0.071	4	27.6	-0.215077	28.75	0.682	-0.552	4	22.5	0.77	-0.377	4	9	-0.461959	15.75	5	FALSE	FALSE	TRUE	FALSE	1.014	0.02	4
Q9NSC2	Sal-like protein 1 OS=Homo sapiens GN=SALL1 PE=1 SV=2 - [SALL1_HUMAN]	SALL1	63.51	2.64	2	2	3	3	1324	140.3	7.02	1.231	0.3	2	25.4	1.186	0.246	2	18.6	0.273217	22	0.916	-0.127	2	39	0.815	-0.295	2	2.4	-0.208394	20.7	1.118	0.161	2	69.3	0.962	-0.056	2	21	0.0565835	45.15		FALSE	FALSE	FALSE		1.172	0.229	2
Q7L190	Developmental pluripotency-associated protein 4 OS=Homo sapiens GN=DPPA4 PE=1 SV=2 - [DPPA4_HUMAN]	DPPA4	137.61	26.97	1	6	6	6	304	33.5	9.52	0.774	-0.37	6	25.6	0.833	-0.264	6	11.9	-0.31563	18.75	0.935	-0.097	6	16.1	0.887	-0.173	6	18	-0.134477	17.05	0.75	-0.415	6	34.7	0.701	-0.513	6	28.1	-0.462952	31.4	4	FALSE	FALSE	TRUE	FALSE	0.99	-0.014	6
Q14966	Zinc finger protein 638 OS=Homo sapiens GN=ZNF638 PE=1 SV=2 - [ZN638_HUMAN]	ZNF638	474.52	11.12	1	16	16	21	1978	220.5	6.38	1.055	0.077	21	16.6	1.133	0.18	21	18	0.129613	17.3	1.11	0.151	21	10.5	0.973	-0.039	21	16.9	0.0586628	13.7	1.097	0.134	21	13.5	1.056	0.079	21	11.3	0.106348	12.4	0	FALSE	FALSE	TRUE	FALSE	1.037	0.052	21
P24468	COUP transcription factor 2 OS=Homo sapiens GN=NR2F2 PE=1 SV=1 - [COT2_HUMAN]	NR2F2	103.91	10.39	2	4	5	7	414	45.5	8.28	1.159	0.213	6	7.6	0.992	-0.012	6	23.6	0.105008	15.6	1.33	0.411	6	9.3	1.387	0.472	6	5.8	0.442015	7.55	1.483	0.569	6	6.8	1.402	0.487	6	17.7	0.528571	12.25	1	FALSE	FALSE	TRUE	FALSE	1.093	0.128	6
O00625	Pirin OS=Homo sapiens GN=PIR PE=1 SV=1 - [PIR_HUMAN]	PIR	299.62	25.86	1	7	7	12	290	32.1	6.92	1.089	0.123	12	60.2	1.121	0.165	12	57.8	0.144046	59	0.798	-0.326	12	26.6	0.772	-0.373	12	29	-0.349235	27.8	1.011	0.016	12	40.8	0.936	-0.095	12	21.6	-0.0387471	31.2	6	FALSE	FALSE	TRUE	FALSE	0.985	-0.022	12
Q9NP58	ATP-binding cassette sub-family B member 6, mitochondrial OS=Homo sapiens GN=ABCB6 PE=1 SV=1 - [ABCB6_HUMAN]	ABCB6	255.99	3.68	1	3	3	5	842	93.8	8.48	0.997	-0.004	5	9.6	0.919	-0.122	5	16.3	-0.0619024	12.95	0.841	-0.25	5	28.9	0.959	-0.06	5	12.2	-0.152003	20.55	0.887	-0.173	5	20.8	0.825	-0.278	5	12.6	-0.224317	16.7	0	FALSE	FALSE	TRUE	FALSE	1.051	0.072	5
P52701	DNA mismatch repair protein Msh6 OS=Homo sapiens GN=MSH6 PE=1 SV=2 - [MSH6_HUMAN]	MSH6	2169.19	37.94	1	43	43	90	1360	152.7	6.9	0.98	-0.029	90	18	1.02	0.029	90	21.2	0	19.6	0.856	-0.224	90	13.6	0.864	-0.211	90	12.5	-0.217591	13.05	0.845	-0.243	90	16.1	0.911	-0.134	90	16	-0.187707	16.05	0	FALSE	FALSE	TRUE	FALSE	0.912	-0.133	90
Q9H553	Alpha-1,3/1,6-mannosyltransferase ALG2 OS=Homo sapiens GN=ALG2 PE=1 SV=1 - [ALG2_HUMAN]	ALG2	110.86	11.54	1	4	4	6	416	47.1	7.05	1.023	0.033	6	22.1	1.008	0.011	6	25.1	0.0221902	23.6	0.949	-0.076	6	8.2	0.997	-0.004	6	10.4	-0.0394883	9.3	0.987	-0.019	6	13	1.019	0.027	6	8.8	0.00432161	10.9	0	FALSE	FALSE	TRUE	FALSE	0.994	-0.009	6
Q2TAA5	GDP-Man:Man(3)GlcNAc(2)-PP-Dol alpha-1,2-mannosyltransferase OS=Homo sapiens GN=ALG11 PE=1 SV=2 - [ALG11_HUMAN]	ALG11	43.51	3.25	1	1	1	1	492	55.6	8.48	1.177	0.235	1	NA	1.102	0.14	1	NA	0.188401	NA	0.87	-0.201	1	NA	1.027	0.038	1	NA	-0.0762803	NA	1.015	0.021	1	NA	1.126	0.171	1	NA	0.0982848	NA		FALSE	FALSE	FALSE		0.97	-0.044	1
Q9NP73	Putative bifunctional UDP-N-acetylglucosamine transferase and deubiquitinase ALG13 OS=Homo sapiens GN=ALG13 PE=1 SV=2 - [ALG13_HUMAN]	ALG13	144.18	4.31	1	4	4	5	1137	126	6.74	0.836	-0.258	5	34.9	0.784	-0.351	5	29.1	-0.304006	32	1.121	0.165	5	1.6	1.06	0.084	5	2.7	0.12499	2.15	0.888	-0.171	5	28.7	0.865	-0.209	5	24.5	-0.190174	26.6	4	FALSE	FALSE	TRUE	FALSE	1.083	0.115	5
Q9H6U8	Alpha-1,2-mannosyltransferase ALG9 OS=Homo sapiens GN=ALG9 PE=1 SV=2 - [ALG9_HUMAN]	ALG9	116.5	4.91	1	2	2	3	611	69.8	8.68	1.229	0.297	3	12.6	1.593	0.672	3	32.7	0.496718	22.65	1.194	0.256	3	20.9	0.741	-0.432	3	31.8	-0.0476664	26.35	1.319	0.399	3	13.8	1.018	0.026	3	7.9	0.224658	10.85		FALSE	FALSE	TRUE	TRUE	1.188	0.249	3
Q9BT22	Chitobiosyldiphosphodolichol beta-mannosyltransferase OS=Homo sapiens GN=ALG1 PE=1 SV=2 - [ALG1_HUMAN]	ALG1	146.9	9.48	2	5	5	9	464	52.5	7.23	1.106	0.145	9	15.1	1.208	0.273	9	28.8	0.210389	21.95	1.063	0.088	9	12.9	0.95	-0.074	9	9.4	0.00934717	11.15	1.16	0.214	9	3.8	1.055	0.077	9	18.5	0.147307	11.15	0	FALSE	FALSE	TRUE	FALSE	1.119	0.162	9
Q7Z4W1	L-xylulose reductase OS=Homo sapiens GN=DCXR PE=1 SV=2 - [DCXR_HUMAN]	DCXR	464.57	41.39	1	10	10	18	244	25.9	8.1	1.199	0.262	15	24.2	1.206	0.27	15	27.1	0.266037	25.65	1.17	0.227	15	10	1.325	0.406	15	13.4	0.31904	11.7	1.207	0.271	15	34.6	1.343	0.425	15	39.5	0.350497	37.05	1	FALSE	FALSE	TRUE	FALSE	1.027	0.038	15
Q75N03	E3 ubiquitin-protein ligase Hakai OS=Homo sapiens GN=CBLL1 PE=1 SV=1 - [HAKAI_HUMAN]	CBLL1	22.07	2.65	1	1	1	1	491	54.5	8.29	0.687	-0.542	1	NA	0.675	-0.567	1	NA	-0.554273	NA	1	0	1	NA	1.06	0.084	1	NA	0.0426443	NA	0.681	-0.554	1	NA	0.712	-0.49	1	NA	-0.521805	NA		FALSE	FALSE	FALSE		1.065	0.091	1
Q16881	Thioredoxin reductase 1, cytoplasmic OS=Homo sapiens GN=TXNRD1 PE=1 SV=3 - [TRXR1_HUMAN]	TXNRD1	3441.36	63.33	1	41	43	129	649	70.9	7.39	0.915	-0.128	122	25.4	0.957	-0.063	122	25.5	-0.0954196	25.45	0.77	-0.377	122	27.4	0.863	-0.213	122	19.3	-0.292475	23.35	0.68	-0.556	122	30.4	0.802	-0.318	122	25.9	-0.432455	28.15	5	FALSE	FALSE	TRUE	FALSE	0.97	-0.044	122
P13611	Versican core protein OS=Homo sapiens GN=VCAN PE=1 SV=3 - [CSPG2_HUMAN]	VCAN	546.24	4.83	1	15	15	27	3396	372.6	4.51	1.111	0.152	27	27.8	1.041	0.058	27	22.2	0.105678	25	1.926	0.946	27	20.1	2.189	1.13	27	23.7	1.04089	21.9	2.263	1.178	27	33.6	2.42	1.275	27	38	1.22743	35.8	2	FALSE	FALSE	TRUE	FALSE	1.053	0.075	27
P62942	Peptidyl-prolyl cis-trans isomerase FKBP1A OS=Homo sapiens GN=FKBP1A PE=1 SV=2 - [FKB1A_HUMAN]	FKBP1A	564.67	37.96	1	5	5	18	108	11.9	8.16	0.809	-0.306	18	52.6	0.759	-0.398	18	49	-0.351074	50.8	0.79	-0.34	18	17.1	0.929	-0.106	18	13.1	-0.21843	15.1	0.615	-0.701	18	46	0.809	-0.306	18	31.3	-0.490051	38.65	5	FALSE	FALSE	TRUE	FALSE	0.916	-0.127	18
Q7L0J3	Synaptic vesicle glycoprotein 2A OS=Homo sapiens GN=SV2A PE=1 SV=1 - [SV2A_HUMAN]	SV2A	117.79	7.41	1	5	5	7	742	82.6	5.57	1.411	0.497	7	16	1.453	0.539	7	54.8	0.518031	35.4	1.257	0.33	7	19.9	1.388	0.473	7	19	0.403268	19.45	1.713	0.777	7	21.4	1.914	0.937	7	23.3	0.858777	22.35	3	FALSE	FALSE	TRUE	FALSE	0.942	-0.086	7
P07902	Galactose-1-phosphate uridylyltransferase OS=Homo sapiens GN=GALT PE=1 SV=3 - [GALT_HUMAN]	GALT	109.9	10.29	1	3	3	4	379	43.3	6.99	0.903	-0.147	4	21.3	0.873	-0.196	4	24.1	-0.171368	22.7	1.187	0.247	4	7	1.332	0.414	4	11.8	0.332851	9.4	1.084	0.116	4	14.1	1.042	0.059	4	15.5	0.0881416	14.8	1	FALSE	FALSE	TRUE	FALSE	1.003	0.004	4
Q15361	Transcription termination factor 1 OS=Homo sapiens GN=TTF1 PE=1 SV=3 - [TTF1_HUMAN]	TTF1	39.04	1.77	1	1	1	1	905	103	9.38	0.927	-0.109	1	NA	1.057	0.08	1	NA	-0.011588	NA	0.693	-0.529	1	NA	0.744	-0.427	1	NA	-0.47694	NA	0.637	-0.651	1	NA	0.783	-0.353	1	NA	-0.494109	NA		FALSE	FALSE	FALSE		0.885	-0.176	1
Q12846	Syntaxin-4 OS=Homo sapiens GN=STX4 PE=1 SV=2 - [STX4_HUMAN]	STX4	85.37	16.84	1	4	4	4	297	34.2	6.28	0.967	-0.048	4	4.2	1.018	0.026	4	14.8	-0.010861	9.5	1.303	0.382	4	1.9	1.359	0.443	4	8.2	0.412511	5.05	1.206	0.27	4	2.6	1.359	0.443	4	3.3	0.358959	2.95	1	FALSE	FALSE	TRUE	FALSE	0.988	-0.017	4
P29372	DNA-3-methyladenine glycosylase OS=Homo sapiens GN=MPG PE=1 SV=3 - [3MG_HUMAN]	MPG	232.44	37.58	1	8	8	11	298	32.8	9.57	0.998	-0.003	11	19.5	1.022	0.031	11	16	0.0143553	17.75	0.986	-0.02	11	5	0.967	-0.048	11	6.5	-0.0343081	5.75	1.001	0.001	11	15.5	0.951	-0.072	11	25.1	-0.0350469	20.3	0	FALSE	FALSE	TRUE	FALSE	1.062	0.087	11
Q53HV7	Single-strand selective monofunctional uracil DNA glycosylase OS=Homo sapiens GN=SMUG1 PE=1 SV=2 - [SMUG1_HUMAN]	SMUG1	0	5.19	1	1	1	1	270	29.8	6.62	0.899	-0.154	1	NA	0.938	-0.092	1	NA	-0.122648	NA	1.211	0.276	1	NA	1.298	0.376	1	NA	0.327112	NA	1.079	0.11	1	NA	1.211	0.276	1	NA	0.195348	NA		FALSE	FALSE	FALSE		1.054	0.076	1
P78549	Endonuclease III-like protein 1 OS=Homo sapiens GN=NTHL1 PE=1 SV=2 - [NTH_HUMAN]	NTHL1	39.87	3.21	1	1	1	1	312	34.4	9.67	0.915	-0.128	1	NA	1.047	0.066	1	NA	-0.027675	NA	1.186	0.246	1	NA	0.937	-0.094	1	NA	0.0861044	NA	1.076	0.106	1	NA	0.976	-0.035	1	NA	0.0370307	NA		FALSE	FALSE	FALSE		0.982	-0.026	1
O60264	SWI/SNF-related matrix-associated actin-dependent regulator of chromatin subfamily A member 5 OS=Homo sapiens GN=SMARCA5 PE=1 SV=1 - [SMCA5_HUMAN]	SMARCA5	1200.97	38.5	1	26	39	67	1052	121.8	8.09	1.154	0.207	38	21.8	1.281	0.357	38	26.1	0.283922	23.95	0.956	-0.065	38	16.9	0.901	-0.15	38	14.4	-0.107026	15.65	1.122	0.166	38	18.6	1.14	0.189	38	14.4	0.177599	16.5	0	FALSE	FALSE	TRUE	FALSE	1.001	0.001	38
Q9UGN5	Poly [ADP-ribose] polymerase 2 OS=Homo sapiens GN=PARP2 PE=1 SV=2 - [PARP2_HUMAN]	PARP2	98.38	7.72	1	4	4	4	583	66.2	8.88	0.827	-0.274	4	16.5	0.946	-0.08	4	6.9	-0.173807	11.7	0.886	-0.175	4	7.4	0.877	-0.189	4	16	-0.181968	11.7	0.704	-0.506	4	6.3	0.807	-0.309	4	19.4	-0.404496	12.85	5	FALSE	FALSE	TRUE	FALSE	0.939	-0.091	4
P49917	DNA ligase 4 OS=Homo sapiens GN=LIG4 PE=1 SV=2 - [DNLI4_HUMAN]	LIG4	271.51	9.44	1	6	6	8	911	103.9	7.96	1.04	0.057	8	15.5	1.091	0.126	8	19.5	0.0915306	17.5	1.121	0.165	8	20.2	1.054	0.076	8	14.8	0.121015	17.5	1.156	0.209	8	5.4	1.145	0.195	8	14.3	0.202261	9.85	0	FALSE	FALSE	TRUE	FALSE	1.024	0.034	8
P13010	X-ray repair cross-complementing protein 5 OS=Homo sapiens GN=XRCC5 PE=1 SV=3 - [XRCC5_HUMAN]	XRCC5	7679.88	65.44	1	53	54	275	732	82.7	5.81	1.245	0.316	272	35.7	1.325	0.406	272	36.7	0.361768	36.2	0.862	-0.214	272	21	0.907	-0.141	272	23.1	-0.177066	22.05	1.062	0.087	272	23.5	1.192	0.253	272	22.8	0.172488	23.15	3	FALSE	FALSE	TRUE	FALSE	0.926	-0.111	272
P12956	X-ray repair cross-complementing protein 6 OS=Homo sapiens GN=XRCC6 PE=1 SV=2 - [XRCC6_HUMAN]	XRCC6	6919.02	67.16	2	51	52	316	609	69.8	6.64	1.185	0.245	315	36.3	1.193	0.255	315	39.1	0.249749	37.7	0.874	-0.194	315	21.5	0.882	-0.181	315	27.2	-0.187707	24.35	1.046	0.065	315	24.5	1.046	0.065	315	26.8	0.0648829	25.65	0	FALSE	FALSE	TRUE	FALSE	0.953	-0.069	315
P18887	DNA repair protein XRCC1 OS=Homo sapiens GN=XRCC1 PE=1 SV=2 - [XRCC1_HUMAN]	XRCC1	402.63	29.23	1	15	15	20	633	69.4	6.39	0.867	-0.206	20	25.8	0.829	-0.271	20	22.6	-0.237864	24.2	0.991	-0.013	20	18	1.132	0.179	20	24	0.0861044	21	0.875	-0.193	20	23.3	0.889	-0.17	20	19.3	-0.181149	21.3	0	FALSE	FALSE	TRUE	FALSE	0.967	-0.048	20
P49916	DNA ligase 3 OS=Homo sapiens GN=LIG3 PE=1 SV=2 - [DNLI3_HUMAN]	LIG3	750.74	22.89	1	20	20	32	1009	112.8	9.01	1.039	0.055	32	12.7	1.024	0.034	32	13.9	0.0447438	13.3	0.933	-0.1	32	18.4	0.894	-0.162	32	17.6	-0.130523	18	0.954	-0.068	32	25.3	0.9	-0.152	32	11	-0.109359	18.15	0	FALSE	FALSE	TRUE	FALSE	0.999	-0.001	32
Q92889	DNA repair endonuclease XPF OS=Homo sapiens GN=ERCC4 PE=1 SV=3 - [XPF_HUMAN]	ERCC4	97.7	3.28	1	2	2	4	916	104.4	6.93	0.956	-0.065	4	14	1.031	0.044	4	16.6	-0.00940813	15.3	1.135	0.183	4	16.5	1.217	0.283	4	25.1	0.233888	20.8	1.169	0.225	4	12.3	1.144	0.194	4	7.5	0.209765	9.9	0	FALSE	FALSE	TRUE	FALSE	1.098	0.135	4
P07992	DNA excision repair protein ERCC-1 OS=Homo sapiens GN=ERCC1 PE=1 SV=1 - [ERCC1_HUMAN]	ERCC1	67.53	13.47	1	3	3	4	297	32.5	6.25	1.094	0.13	4	40.8	1.179	0.238	4	44.1	0.184598	42.45	0.886	-0.175	4	15.4	0.894	-0.162	4	26.9	-0.168123	21.15	0.944	-0.083	4	21.7	1.049	0.069	4	15.8	-0.00505829	18.75	0	FALSE	FALSE	TRUE	FALSE	0.917	-0.125	4
P78527	DNA-dependent protein kinase catalytic subunit OS=Homo sapiens GN=PRKDC PE=1 SV=3 - [PRKDC_HUMAN]	PRKDC	7432.71	36.43	1	150	150	305	4128	468.8	7.12	1.207	0.271	303	26.5	1.41	0.496	303	37.5	0.387914	32	1.036	0.051	303	15.8	0.818	-0.29	303	19.4	-0.109359	17.6	1.237	0.307	303	22.5	1.181	0.24	303	23.7	0.273814	23.1	3	FALSE	FALSE	TRUE	FALSE	1.023	0.033	303
Q9NWV8	BRISC and BRCA1-A complex member 1 OS=Homo sapiens GN=BABAM1 PE=1 SV=1 - [BABA1_HUMAN]	BABAM1	541.87	50.15	1	11	11	15	329	36.5	4.64	1.198	0.261	13	46.2	1.122	0.166	13	31.4	0.214125	38.8	0.91	-0.136	13	17.8	1.011	0.016	13	13.5	-0.0581425	15.65	1.086	0.119	13	37.7	1.236	0.306	13	30.7	0.215368	34.2	0	FALSE	FALSE	TRUE	FALSE	0.993	-0.01	13
Q96RL1	BRCA1-A complex subunit RAP80 OS=Homo sapiens GN=UIMC1 PE=1 SV=2 - [UIMC1_HUMAN]	UIMC1	132.06	10.57	1	5	5	7	719	79.7	5.45	0.852	-0.231	7	32.2	0.853	-0.229	7	27.6	-0.230228	29.9	0.97	-0.044	7	23.4	0.814	-0.297	7	37.5	-0.164884	30.45	0.759	-0.398	7	14.5	0.737	-0.44	7	9.5	-0.41889	12	5	FALSE	FALSE	TRUE	FALSE	1.038	0.054	7
P46736	Lys-63-specific deubiquitinase BRCC36 OS=Homo sapiens GN=BRCC3 PE=1 SV=2 - [BRCC3_HUMAN]	BRCC3	146.1	19.94	1	6	6	9	316	36	5.92	0.985	-0.022	9	7	0.941	-0.088	9	18.7	-0.0543923	12.85	0.981	-0.028	9	9.3	1.116	0.158	9	11.4	0.0683269	10.35	0.917	-0.125	9	9.1	1.008	0.011	9	13.8	-0.0551416	11.45	0	FALSE	FALSE	TRUE	FALSE	0.968	-0.047	9
O43502	DNA repair protein RAD51 homolog 3 OS=Homo sapiens GN=RAD51C PE=1 SV=1 - [RA51C_HUMAN]	RAD51C	55.79	5.85	1	1	1	1	376	42.2	6.74	1.047	0.066	1	NA	1.039	0.055	1	NA	0.0607392	NA	0.664	-0.591	1	NA	0.744	-0.427	1	NA	-0.506353	NA	0.689	-0.537	1	NA	0.769	-0.379	1	NA	-0.456009	NA		FALSE	FALSE	FALSE		0.927	-0.109	1
Q13426	DNA repair protein XRCC4 OS=Homo sapiens GN=XRCC4 PE=1 SV=2 - [XRCC4_HUMAN]	XRCC4	186.24	16.67	1	5	5	11	336	38.3	4.98	0.918	-0.123	11	15.5	0.996	-0.006	11	15.3	-0.0634092	15.4	1.018	0.026	11	18.6	1.026	0.037	11	14	0.0313952	16.3	0.937	-0.094	11	9.5	0.945	-0.082	11	13.6	-0.0877334	11.55	0	FALSE	FALSE	TRUE	FALSE	0.969	-0.045	11
Q12888	Tumor suppressor p53-binding protein 1 OS=Homo sapiens GN=TP53BP1 PE=1 SV=2 - [TP53B_HUMAN]	TP53BP1	3428.97	42.9	1	66	67	134	1972	213.4	4.7	1.153	0.205	133	31.2	1.105	0.144	133	28.1	0.175045	29.65	1.151	0.203	133	17.8	1.198	0.261	133	24	0.232047	20.9	1.338	0.42	133	18.9	1.362	0.446	133	24.4	0.432959	21.65	1	FALSE	FALSE	TRUE	FALSE	0.981	-0.028	133
Q96T88	E3 ubiquitin-protein ligase UHRF1 OS=Homo sapiens GN=UHRF1 PE=1 SV=1 - [UHRF1_HUMAN]	UHRF1	884.89	25.98	1	16	17	35	793	89.8	7.56	0.894	-0.162	34	26.6	1.028	0.04	34	16.9	-0.0573917	21.75	0.639	-0.646	34	22.5	0.595	-0.749	34	29.9	-0.696658	26.2	0.588	-0.766	34	37	0.559	-0.839	34	33.4	-0.802135	35.2	5	FALSE	FALSE	TRUE	FALSE	0.946	-0.08	34
Q9UBC3	DNA (cytosine-5)-methyltransferase 3B OS=Homo sapiens GN=DNMT3B PE=1 SV=1 - [DNM3B_HUMAN]	DNMT3B	61.89	3.99	1	2	4	6	853	95.7	8.43	1.068	0.095	3	22.9	1.022	0.031	3	11.2	0.0635029	17.05	1.373	0.457	3	23.3	1.379	0.464	3	2.1	0.46048	12.7	1.451	0.537	3	0.3	1.491	0.576	3	11.5	0.556797	5.9	1	FALSE	FALSE	TRUE	FALSE	1.083	0.115	3
P26358	DNA (cytosine-5)-methyltransferase 1 OS=Homo sapiens GN=DNMT1 PE=1 SV=2 - [DNMT1_HUMAN]	DNMT1	461.26	16.34	1	22	23	28	1616	183	7.75	1.007	0.01	27	14.6	1.016	0.023	27	16.1	0.0164963	15.35	0.893	-0.163	27	17.1	0.807	-0.309	27	29.5	-0.234465	23.3	0.92	-0.12	27	11.8	0.867	-0.206	27	20.9	-0.16246	16.35	0	FALSE	FALSE	TRUE	FALSE	1.047	0.066	27
Q9Y6K1	DNA (cytosine-5)-methyltransferase 3A OS=Homo sapiens GN=DNMT3A PE=1 SV=4 - [DNM3A_HUMAN]	DNMT3A	324.28	17.87	1	12	14	18	912	101.8	6.57	1.036	0.051	15	14.9	1.135	0.183	15	24.6	0.11836	19.75	1.227	0.295	15	24.3	1.147	0.198	15	35	0.24732	29.65	1.34	0.422	15	20.5	1.259	0.332	15	21.3	0.377957	20.9	1	FALSE	FALSE	TRUE	FALSE	1.043	0.061	15
Q0VG06	Fanconi anemia core complex-associated protein 100 OS=Homo sapiens GN=FAAP100 PE=1 SV=3 - [FP100_HUMAN]	FAAP100	42.55	1.93	1	1	1	1	881	93.4	5.29	1.563	0.644	1	NA	1.7	0.766	1	NA	0.706199	NA	0.984	-0.023	1	NA	1.045	0.064	1	NA	0.0207689	NA	1.524	0.608	1	NA	1.767	0.821	1	NA	0.718526	NA		FALSE	FALSE	FALSE		0.912	-0.133	1
Q9HB96	Fanconi anemia group E protein OS=Homo sapiens GN=FANCE PE=1 SV=1 - [FANCE_HUMAN]	FANCE	59.97	2.24	1	1	1	1	536	58.7	5.24	0.828	-0.272	1	NA	0.79	-0.34	1	NA	-0.305788	NA	0.801	-0.32	1	NA	0.849	-0.236	1	NA	-0.277534	NA	0.657	-0.606	1	NA	0.668	-0.582	1	NA	-0.594008	NA		FALSE	FALSE	FALSE		0.953	-0.069	1
P27695	DNA-(apurinic or apyrimidinic site) lyase OS=Homo sapiens GN=APEX1 PE=1 SV=2 - [APEX1_HUMAN]	APEX1	1792.76	64.47	1	20	20	66	318	35.5	8.12	1.112	0.153	65	50.1	1.18	0.239	65	44.4	0.196607	47.25	1.038	0.054	65	25.1	1.019	0.027	65	20.4	0.0405418	22.75	1.132	0.179	65	23.2	1.181	0.24	65	28.2	0.209765	25.7	0	FALSE	FALSE	TRUE	FALSE	0.966	-0.05	65
P06746	DNA polymerase beta OS=Homo sapiens GN=POLB PE=1 SV=3 - [DPOLB_HUMAN]	POLB	296.34	29.55	1	10	10	18	335	38.2	8.95	1.075	0.104	18	23.6	1.034	0.048	18	25.4	0.0765591	24.5	1.085	0.118	18	16.8	1.091	0.126	18	18.4	0.121679	17.6	1.24	0.31	18	16.9	1.1	0.138	18	27	0.226509	21.95	0	FALSE	FALSE	TRUE	FALSE	0.985	-0.022	18
P54725	UV excision repair protein RAD23 homolog A OS=Homo sapiens GN=RAD23A PE=1 SV=1 - [RD23A_HUMAN]	RAD23A	503.35	27.27	1	6	9	28	363	39.6	4.58	0.815	-0.295	15	18.1	0.827	-0.274	15	14.5	-0.284546	16.3	1.11	0.151	15	15.3	1.017	0.024	15	23.1	0.08882	19.2	0.899	-0.154	15	23.7	0.735	-0.444	15	43.9	-0.291592	33.8	0	FALSE	FALSE	TRUE	FALSE	0.984	-0.023	15
Q92905	COP9 signalosome complex subunit 5 OS=Homo sapiens GN=COPS5 PE=1 SV=4 - [CSN5_HUMAN]	COPS5	1307.13	64.67	1	20	20	51	334	37.6	6.54	1.129	0.175	51	23.6	1.079	0.11	51	29.4	0.14274	26.5	0.903	-0.147	51	18.3	0.975	-0.037	51	24.2	-0.0908029	21.25	1.001	0.001	51	19.2	1.058	0.081	51	19.3	0.0419438	19.25	0	FALSE	FALSE	TRUE	FALSE	0.924	-0.114	51
P61201	COP9 signalosome complex subunit 2 OS=Homo sapiens GN=COPS2 PE=1 SV=1 - [CSN2_HUMAN]	COPS2	1159.35	48.31	1	22	22	61	443	51.6	5.53	1.194	0.256	61	21.4	1.388	0.473	61	25.7	0.368489	23.55	0.895	-0.16	61	10.2	0.937	-0.094	61	13.6	-0.12658	11.9	1.055	0.077	61	19	1.261	0.335	61	17.7	0.211635	18.35	3	FALSE	FALSE	TRUE	FALSE	0.898	-0.155	61
Q13098	COP9 signalosome complex subunit 1 OS=Homo sapiens GN=GPS1 PE=1 SV=4 - [CSN1_HUMAN]	GPS1	1137.9	44.4	1	24	24	48	491	55.5	6.74	1.017	0.024	48	15	1.014	0.02	48	19.9	0.0221902	17.45	1.053	0.075	48	17.4	1.034	0.048	48	17.5	0.0614306	17.45	1.066	0.092	48	19.3	1.038	0.054	48	18.5	0.0731347	18.9	0	FALSE	FALSE	TRUE	FALSE	0.999	-0.001	48
Q9UBW8	COP9 signalosome complex subunit 7a OS=Homo sapiens GN=COPS7A PE=1 SV=1 - [CSN7A_HUMAN]	COPS7A	336.36	32.73	1	8	8	13	275	30.3	8.22	1.009	0.013	13	19.1	0.947	-0.079	13	15.7	-0.0320936	17.4	0.938	-0.092	13	17	0.949	-0.076	13	12.8	-0.0839056	14.9	0.943	-0.085	13	10.2	0.967	-0.048	13	15.4	-0.0664274	12.8	0	FALSE	FALSE	TRUE	FALSE	0.974	-0.038	13
Q9H9Q2	COP9 signalosome complex subunit 7b OS=Homo sapiens GN=COPS7B PE=1 SV=1 - [CSN7B_HUMAN]	COPS7B	636.43	35.61	1	8	8	20	264	29.6	6.15	1.056	0.079	20	29.5	1.009	0.013	20	16.9	0.0461418	23.2	1.069	0.096	20	11.2	1.16	0.214	20	21.6	0.156397	16.4	1.072	0.1	20	26.5	1.106	0.145	20	22.4	0.123004	24.45	0	FALSE	FALSE	TRUE	FALSE	0.998	-0.003	20
Q7L5N1	COP9 signalosome complex subunit 6 OS=Homo sapiens GN=COPS6 PE=1 SV=1 - [CSN6_HUMAN]	COPS6	1051.33	49.24	1	13	13	39	327	36.1	5.73	1.071	0.099	39	24.9	1.086	0.119	39	23.7	0.109026	24.3	0.918	-0.123	39	14.1	0.993	-0.01	39	14.8	-0.0656722	14.45	0.99	-0.014	39	14.3	1.074	0.103	39	20.2	0.045443	17.25	0	FALSE	FALSE	TRUE	FALSE	0.984	-0.023	39
Q9UNS2	COP9 signalosome complex subunit 3 OS=Homo sapiens GN=COPS3 PE=1 SV=3 - [CSN3_HUMAN]	COPS3	1848.12	49.41	1	16	16	62	423	47.8	6.65	0.923	-0.116	57	22.9	0.887	-0.173	57	21.4	-0.14401	22.15	0.967	-0.048	57	15.7	1.087	0.12	57	14.2	0.0384362	14.95	0.886	-0.175	57	9.8	0.947	-0.079	57	11.1	-0.125793	10.45	0	FALSE	FALSE	TRUE	FALSE	0.977	-0.034	57
Q9BT78	COP9 signalosome complex subunit 4 OS=Homo sapiens GN=COPS4 PE=1 SV=1 - [CSN4_HUMAN]	COPS4	1513.69	74.63	1	28	28	66	406	46.2	5.83	0.927	-0.109	65	31.8	0.921	-0.119	65	33.2	-0.114035	32.5	0.96	-0.059	65	12.3	1.107	0.147	65	18.3	0.0475384	15.3	0.877	-0.189	65	25.9	0.991	-0.013	65	21.6	-0.0985055	23.75	0	FALSE	FALSE	TRUE	FALSE	0.953	-0.069	65
Q99627	COP9 signalosome complex subunit 8 OS=Homo sapiens GN=COPS8 PE=1 SV=1 - [CSN8_HUMAN]	COPS8	1159	63.64	1	10	10	41	209	23.2	5.38	0.996	-0.006	41	27.6	0.933	-0.1	41	30	-0.0521469	28.8	0.955	-0.066	41	15.7	1.014	0.02	41	22.1	-0.0225369	18.9	0.935	-0.097	41	15.7	0.995	-0.007	41	25.3	-0.0513992	20.5	0	FALSE	FALSE	TRUE	FALSE	0.974	-0.038	41
Q9UPN9	E3 ubiquitin-protein ligase TRIM33 OS=Homo sapiens GN=TRIM33 PE=1 SV=3 - [TRI33_HUMAN]	TRIM33	455.27	8.52	1	7	10	23	1127	122.5	6.67	1.137	0.185	17	14.8	1.146	0.197	17	12.5	0.190931	13.65	1.017	0.024	17	11.4	0.906	-0.142	17	20.3	-0.0566412	15.85	1.086	0.119	17	11.4	1.114	0.156	17	9.4	0.137504	10.4	0	FALSE	FALSE	TRUE	FALSE	0.931	-0.103	17
Q13480	GRB2-associated-binding protein 1 OS=Homo sapiens GN=GAB1 PE=1 SV=2 - [GAB1_HUMAN]	GAB1	138.06	6.34	1	3	3	4	694	76.6	5.96	1.136	0.184	4	42.5	1.065	0.091	4	43.3	0.138159	42.9	1.055	0.077	4	15.7	1.02	0.029	4	41.2	0.0531113	28.45	1.078	0.108	4	13.9	1.16	0.214	4	8	0.16221	10.95	0	FALSE	FALSE	TRUE	FALSE	1.03	0.043	4
Q8WU20	Fibroblast growth factor receptor substrate 2 OS=Homo sapiens GN=FRS2 PE=1 SV=4 - [FRS2_HUMAN]	FRS2	82.35	7.48	1	2	2	3	508	57	5.96	0.976	-0.035	3	21	0.941	-0.088	3	46.1	-0.0611497	33.55	1.051	0.072	3	1.2	1.304	0.383	3	15.7	0.235727	8.45	1.16	0.214	3	16.9	1.221	0.288	3	17.9	0.251568	17.4	0	FALSE	FALSE	TRUE	FALSE	1.005	0.007	3
Q16531	DNA damage-binding protein 1 OS=Homo sapiens GN=DDB1 PE=1 SV=1 - [DDB1_HUMAN]	DDB1	2303.64	44.12	1	46	46	125	1140	126.9	5.26	1.214	0.28	125	33.5	1.184	0.244	125	30.2	0.261832	31.85	0.849	-0.236	125	17.1	0.962	-0.056	125	16.5	-0.143213	16.8	1.065	0.091	125	23.2	1.14	0.189	125	21.5	0.140779	22.35	0	FALSE	FALSE	TRUE	FALSE	0.914	-0.13	125
Q13620	Cullin-4B OS=Homo sapiens GN=CUL4B PE=1 SV=4 - [CUL4B_HUMAN]	CUL4B	1103.28	37.79	1	26	36	55	913	103.9	7.37	1.309	0.388	43	46.1	1.229	0.297	43	37.1	0.343692	41.6	1.01	0.014	43	23.2	1.019	0.027	43	15.7	0.0207689	19.45	1.234	0.303	43	26.5	1.234	0.303	43	16.5	0.303342	21.5	3	FALSE	FALSE	TRUE	FALSE	0.974	-0.038	43
Q13619	Cullin-4A OS=Homo sapiens GN=CUL4A PE=1 SV=3 - [CUL4A_HUMAN]	CUL4A	658.32	39.53	1	16	26	39	759	87.6	8.13	1.176	0.234	27	49.4	1.252	0.324	27	26.4	0.279768	37.9	0.776	-0.366	27	18.5	0.769	-0.379	27	18.8	-0.372393	18.65	0.986	-0.02	27	23	1.005	0.007	27	19.8	-0.00650678	21.4	6	FALSE	FALSE	TRUE	FALSE	0.937	-0.094	27
Q13216	DNA excision repair protein ERCC-8 OS=Homo sapiens GN=ERCC8 PE=1 SV=1 - [ERCC8_HUMAN]	ERCC8	46.88	2.02	1	1	1	1	396	44	6.35	NA	NA	NA	NA	NA	NA	NA	NA	NA	NA	NA	NA	NA	NA	NA	NA	NA	NA	NA	NA	NA	NA	NA	NA	NA	NA	NA	NA	NA	NA		TRUE	FALSE			NA	NA	NA
P63146	Ubiquitin-conjugating enzyme E2 B OS=Homo sapiens GN=UBE2B PE=1 SV=1 - [UBE2B_HUMAN]	UBE2B	66.85	19.74	1	2	2	2	152	17.3	5.01	1.031	0.044	2	38.4	0.912	-0.133	2	29.4	-0.0417141	33.9	0.923	-0.116	2	17	0.982	-0.026	2	26.7	-0.070209	21.85	0.943	-0.085	2	20.4	0.891	-0.167	2	2.5	-0.125006	11.45		FALSE	FALSE	FALSE		1.031	0.044	2
P49459	Ubiquitin-conjugating enzyme E2 A OS=Homo sapiens GN=UBE2A PE=1 SV=2 - [UBE2A_HUMAN]	UBE2A	42.06	11.18	1	1	1	1	152	17.3	5.15	1.382	0.467	1	NA	1.042	0.059	1	NA	0.27739	NA	0.773	-0.371	1	NA	0.783	-0.353	1	NA	-0.362158	NA	1.059	0.083	1	NA	0.813	-0.299	1	NA	-0.0954196	NA		FALSE	FALSE	FALSE		1.163	0.218	1
P68036	Ubiquitin-conjugating enzyme E2 L3 OS=Homo sapiens GN=UBE2L3 PE=1 SV=1 - [UB2L3_HUMAN]	UBE2L3	1205.12	69.48	1	7	7	41	154	17.9	8.51	0.987	-0.019	41	39.6	1.129	0.175	41	34.5	0.0813396	37.05	0.864	-0.211	41	20.3	0.936	-0.095	41	24.8	-0.152003	22.55	1.075	0.104	41	20.4	1.126	0.171	41	33.4	0.138159	26.9	0	FALSE	FALSE	TRUE	FALSE	0.94	-0.089	41
O75096	Low-density lipoprotein receptor-related protein 4 OS=Homo sapiens GN=LRP4 PE=1 SV=4 - [LRP4_HUMAN]	LRP4	100.23	2.62	1	4	4	4	1905	211.9	5.27	1.071	0.099	4	12.2	0.966	-0.05	4	10.2	0.026446	11.2	0.969	-0.045	4	15.3	0.926	-0.111	4	7.4	-0.0778022	11.35	1.168	0.224	4	20.2	0.85	-0.234	4	3.4	0.0129262	11.8	0	FALSE	FALSE	TRUE	FALSE	1.143	0.193	4
Q15262	Receptor-type tyrosine-protein phosphatase kappa OS=Homo sapiens GN=PTPRK PE=1 SV=2 - [PTPRK_HUMAN]	PTPRK	64.26	1.53	1	2	2	2	1439	162	5.9	1.119	0.162	2	46.7	1.257	0.33	2	79	0.248535	62.85	0.772	-0.373	2	3.9	0.628	-0.671	2	49.2	-0.514573	26.55	0.857	-0.223	2	42.3	0.786	-0.347	2	23.4	-0.283668	32.85		FALSE	FALSE	FALSE		1.055	0.077	2
Q9NT22	EMILIN-3 OS=Homo sapiens GN=EMILIN3 PE=2 SV=2 - [EMIL3_HUMAN]	EMILIN3	63.28	4.96	1	2	2	2	766	82.6	7.72	1.181	0.24	2	5.1	1.064	0.089	2	9.1	0.166715	7.1	1.023	0.033	2	2.9	0.949	-0.076	2	8.2	-0.0203404	5.55	1.198	0.261	2	2.1	1.005	0.007	2	0.9	0.139469	1.5		FALSE	FALSE	FALSE		1.087	0.12	2
P23142	Fibulin-1 OS=Homo sapiens GN=FBLN1 PE=1 SV=4 - [FBLN1_HUMAN]	FBLN1	342.57	14.79	1	10	10	19	703	77.2	5.22	1.09	0.124	19	20.9	0.956	-0.065	19	11.3	0.0328061	16.1	1.543	0.626	19	15.9	1.694	0.76	19	24.3	0.694657	20.1	1.536	0.619	19	27.9	1.59	0.669	19	27.9	0.644318	27.9	1	FALSE	FALSE	TRUE	FALSE	1.077	0.107	19
Q9BXX0	EMILIN-2 OS=Homo sapiens GN=EMILIN2 PE=1 SV=3 - [EMIL2_HUMAN]	EMILIN2	87.92	1.23	1	1	1	3	1053	115.6	6.46	0.7	-0.515	3	7.1	0.71	-0.494	3	1.8	-0.504305	4.45	1.008	0.011	3	7.5	1.127	0.172	3	2.1	0.0942361	4.8	0.76	-0.396	3	21.6	0.808	-0.308	3	3.9	-0.351074	12.75	4	FALSE	FALSE	TRUE	FALSE	1.016	0.023	3
P98095	Fibulin-2 OS=Homo sapiens GN=FBLN2 PE=1 SV=2 - [FBLN2_HUMAN]	FBLN2	69.79	1.01	1	2	2	3	1184	126.5	4.82	1.378	0.463	3	30.1	0.948	-0.077	3	7.8	0.217851	18.95	1.278	0.354	3	16	0.981	-0.028	3	7.5	0.175684	11.75	1.568	0.649	3	21.8	0.926	-0.111	3	15.4	0.318461	18.6		FALSE	FALSE	TRUE	TRUE	1.406	0.492	3
Q14767	Latent-transforming growth factor beta-binding protein 2 OS=Homo sapiens GN=LTBP2 PE=1 SV=3 - [LTBP2_HUMAN]	LTBP2	49.23	0.6	1	1	1	1	1821	194.9	5.19	0.715	-0.484	1	NA	0.638	-0.648	1	NA	-0.563838	NA	1.302	0.381	1	NA	1.255	0.328	1	NA	0.354452	NA	0.923	-0.116	1	NA	0.797	-0.327	1	NA	-0.217591	NA		FALSE	FALSE	FALSE		1.202	0.265	1
P55001	Microfibrillar-associated protein 2 OS=Homo sapiens GN=MFAP2 PE=2 SV=1 - [MFAP2_HUMAN]	MFAP2	36.72	5.46	1	1	1	1	183	20.8	4.97	1.334	0.416	1	NA	1.192	0.253	1	NA	0.336855	NA	0.923	-0.116	1	NA	1.055	0.077	1	NA	-0.0159576	NA	1.22	0.287	1	NA	1.251	0.323	1	NA	0.305095	NA		FALSE	FALSE	FALSE		1.004	0.006	1
P55081	Microfibrillar-associated protein 1 OS=Homo sapiens GN=MFAP1 PE=1 SV=2 - [MFAP1_HUMAN]	MFAP1	458.87	32.35	1	12	12	21	439	51.9	4.98	1.206	0.27	21	25	0.958	-0.062	21	20.7	0.1137	22.85	0.914	-0.13	21	24.1	0.989	-0.016	21	12.5	-0.0717244	18.3	1.061	0.085	21	23.2	1.072	0.1	21	21.9	0.092884	22.55	0	FALSE	FALSE	TRUE	FALSE	0.984	-0.023	21
P35556	Fibrillin-2 OS=Homo sapiens GN=FBN2 PE=1 SV=3 - [FBN2_HUMAN]	FBN2	273.73	3.61	2	8	8	10	2912	314.6	4.86	1.064	0.089	10	34.5	0.986	-0.02	10	20.2	0.0356239	27.35	0.963	-0.054	10	37	0.898	-0.155	10	41.3	-0.103922	39.15	0.989	-0.016	10	24.7	1.066	0.092	10	39.7	0.0391384	32.2	0	FALSE	FALSE	TRUE	FALSE	1.053	0.075	10
Q02318	Sterol 26-hydroxylase, mitochondrial OS=Homo sapiens GN=CYP27A1 PE=1 SV=1 - [CP27A_HUMAN]	CYP27A1	19.53	1.51	1	1	1	1	531	60.2	8.9	1.387	0.472	1	NA	0.982	-0.026	1	NA	0.244278	NA	0.999	-0.001	1	NA	0.952	-0.071	1	NA	-0.0357862	NA	1.374	0.458	1	NA	0.931	-0.103	1	NA	0.204767	NA		FALSE	FALSE	FALSE		1.185	0.245	1
Q7RTN6	STE20-related kinase adapter protein alpha OS=Homo sapiens GN=STRADA PE=1 SV=1 - [STRAA_HUMAN]	STRADA	156.36	7.42	1	2	2	4	431	48.3	6.48	1.225	0.293	4	6.7	1.145	0.195	4	15.9	0.244887	11.3	0.941	-0.088	4	13.5	1.045	0.064	4	18.9	-0.0101344	16.2	1.1	0.138	4	12.4	1.172	0.229	4	7.7	0.183963	10.05	0	FALSE	FALSE	TRUE	FALSE	1.005	0.007	4
O75608	Acyl-protein thioesterase 1 OS=Homo sapiens GN=LYPLA1 PE=1 SV=1 - [LYPA1_HUMAN]	LYPLA1	409.93	34.35	1	6	6	16	230	24.7	6.77	0.924	-0.114	16	34.4	0.881	-0.183	16	20	-0.148001	27.2	0.942	-0.086	16	12.8	1.047	0.066	16	11.9	-0.00795672	12.35	0.788	-0.344	16	30.3	0.904	-0.146	16	42	-0.24127	36.15	0	FALSE	FALSE	TRUE	FALSE	0.969	-0.045	16
O94760	N(G),N(G)-dimethylarginine dimethylaminohydrolase 1 OS=Homo sapiens GN=DDAH1 PE=1 SV=3 - [DDAH1_HUMAN]	DDAH1	2811.54	72.28	1	18	19	95	285	31.1	5.81	1.135	0.183	90	25	1.114	0.156	90	26.6	0.169284	25.8	1.009	0.013	90	12.6	1.116	0.158	90	16.3	0.0874628	14.45	1.141	0.19	90	24.1	1.199	0.262	90	21.8	0.226509	22.95	0	FALSE	FALSE	TRUE	FALSE	0.948	-0.077	90
O95865	N(G),N(G)-dimethylarginine dimethylaminohydrolase 2 OS=Homo sapiens GN=DDAH2 PE=1 SV=1 - [DDAH2_HUMAN]	DDAH2	4734.34	57.54	1	14	15	98	285	29.6	6.01	0.969	-0.045	92	16.2	0.973	-0.039	92	15.8	-0.0424568	16	1.76	0.816	92	20.2	1.957	0.969	92	17.5	0.894139	18.85	1.705	0.77	92	16.8	1.888	0.917	92	24.1	0.845189	20.45	2	FALSE	FALSE	TRUE	FALSE	0.996	-0.006	92
Q05397	Focal adhesion kinase 1 OS=Homo sapiens GN=PTK2 PE=1 SV=2 - [FAK1_HUMAN]	PTK2	723.33	26.43	2	25	26	37	1052	119.2	6.62	0.913	-0.131	36	28.7	0.888	-0.171	36	30	-0.151202	29.35	0.923	-0.116	36	28.5	0.978	-0.032	36	15.5	-0.0732415	22	0.878	-0.188	36	55.2	0.96	-0.059	36	48.6	-0.121863	51.9	0	FALSE	FALSE	TRUE	FALSE	0.931	-0.103	36
P60709	Actin, cytoplasmic 1 OS=Homo sapiens GN=ACTB PE=1 SV=1 - [ACTB_HUMAN]	ACTB	78044.5	84.27	2	2	49	2774	375	41.7	5.48	0.872	-0.198	117	10.5	0.86	-0.218	117	20.8	-0.207561	15.65	1.116	0.158	117	14.6	1.186	0.246	117	14	0.202888	14.3	0.987	-0.019	117	14.3	1.033	0.047	117	21.9	0.0143553	18.1	0	FALSE	FALSE	TRUE	FALSE	1.033	0.047	117
P63261	Actin, cytoplasmic 2 OS=Homo sapiens GN=ACTG1 PE=1 SV=1 - [ACTG_HUMAN]	ACTG1	81582.4	84.27	2	2	49	2862	375	41.8	5.48	0.863	-0.213	203	13	0.917	-0.125	203	20.1	-0.168123	16.55	1.124	0.169	203	13.5	1.184	0.244	203	15.6	0.206643	14.55	0.992	-0.012	203	15.4	1.105	0.144	203	22.4	0.0683269	18.9	0	FALSE	FALSE	TRUE	FALSE	0.989	-0.016	203
O94973	AP-2 complex subunit alpha-2 OS=Homo sapiens GN=AP2A2 PE=1 SV=2 - [AP2A2_HUMAN]	AP2A2	2457.76	43.77	1	21	34	87	939	103.9	6.96	0.999	-0.001	63	14.3	1.088	0.122	63	19.7	0.0614306	17	1.124	0.169	63	12.7	1.214	0.28	63	11.2	0.225275	11.95	1.187	0.247	63	11.6	1.319	0.399	63	19.7	0.325386	15.65	1	FALSE	FALSE	TRUE	FALSE	0.939	-0.091	63
Q00610	Clathrin heavy chain 1 OS=Homo sapiens GN=CLTC PE=1 SV=5 - [CLH1_HUMAN]	CLTC	10775.3	57.25	1	105	105	418	1675	191.5	5.69	1.22	0.287	411	29.7	1.23	0.299	411	34	0.292782	31.85	0.973	-0.039	411	21.5	1.061	0.085	411	20.4	0.0243197	20.95	1.176	0.234	411	20.1	1.298	0.376	411	26	0.306846	23.05	3	FALSE	FALSE	TRUE	FALSE	0.955	-0.066	411
P09496	Clathrin light chain A OS=Homo sapiens GN=CLTA PE=1 SV=1 - [CLCA_HUMAN]	CLTA	322.96	28.63	2	8	8	31	248	27.1	4.51	0.909	-0.138	26	17.5	0.954	-0.068	26	17.7	-0.102372	17.6	1.047	0.066	26	11.3	1.078	0.108	26	8.9	0.0874628	10.1	0.986	-0.02	26	16.9	1.046	0.065	26	17.5	0.0229004	17.2	0	FALSE	FALSE	TRUE	FALSE	1.001	0.001	26
P53680	AP-2 complex subunit sigma OS=Homo sapiens GN=AP2S1 PE=1 SV=2 - [AP2S1_HUMAN]	AP2S1	248.15	34.51	1	5	5	14	142	17	6.18	1.18	0.239	14	18.4	1.091	0.126	14	22.8	0.183328	20.6	0.995	-0.007	14	7.8	1.11	0.151	14	6.8	0.0738202	7.3	1.141	0.19	14	27.1	1.202	0.265	14	28.1	0.228357	27.6	0	FALSE	FALSE	TRUE	FALSE	0.968	-0.047	14
P63010	AP-2 complex subunit beta OS=Homo sapiens GN=AP2B1 PE=1 SV=1 - [AP2B1_HUMAN]	AP2B1	4802.71	44.18	1	25	42	181	937	104.5	5.38	1.069	0.096	113	21.7	1.092	0.127	113	27.6	0.111699	24.65	0.998	-0.003	113	13.6	1.064	0.089	113	19.2	0.0440443	16.4	1.052	0.073	113	13.3	1.193	0.255	113	18.4	0.166715	15.85	0	FALSE	FALSE	TRUE	FALSE	0.931	-0.103	113
Q96CW1	AP-2 complex subunit mu OS=Homo sapiens GN=AP2M1 PE=1 SV=2 - [AP2M1_HUMAN]	AP2M1	1869.28	50.34	1	22	22	77	435	49.6	9.54	1.039	0.055	77	14.9	1.047	0.066	77	21.2	0.0607392	18.05	1.136	0.184	77	9.7	1.229	0.297	77	17.2	0.24184	13.45	1.177	0.235	77	12.1	1.272	0.347	77	23.4	0.292193	17.75	0	FALSE	FALSE	TRUE	FALSE	0.991	-0.013	77
O95782	AP-2 complex subunit alpha-1 OS=Homo sapiens GN=AP2A1 PE=1 SV=3 - [AP2A1_HUMAN]	AP2A1	2248.78	37.77	1	27	40	104	977	107.5	7.03	1.08	0.111	80	27.2	1.078	0.108	80	37.5	0.109695	32.35	1.096	0.132	80	18.2	1.17	0.227	80	16.2	0.180148	17.2	1.092	0.127	80	22.7	1.205	0.269	80	24.8	0.199751	23.75	0	FALSE	FALSE	TRUE	FALSE	0.968	-0.047	80
O14672	Disintegrin and metalloproteinase domain-containing protein 10 OS=Homo sapiens GN=ADAM10 PE=1 SV=1 - [ADA10_HUMAN]	ADAM10	32.47	3.21	1	2	2	2	748	84.1	7.77	0.943	-0.085	2	27.9	0.885	-0.176	2	1.1	-0.129734	14.5	1.175	0.233	2	7.6	1.072	0.1	2	10.8	0.168	9.2	1.099	0.136	2	36	0.944	-0.083	2	12	0.0306892	24		FALSE	FALSE	FALSE		1.099	0.136	2
P06241	Tyrosine-protein kinase Fyn OS=Homo sapiens GN=FYN PE=1 SV=3 - [FYN_HUMAN]	FYN	180.22	11.36	9	3	7	12	537	60.7	6.67	1.021	0.03	3	8.8	1.011	0.016	3	33.6	0.0229004	21.2	1.279	0.355	3	19.4	1.575	0.655	3	65.9	0.512985	42.65	1.488	0.573	3	25.7	1.318	0.398	3	25.3	0.488515	25.5	1	FALSE	FALSE	TRUE	FALSE	1.125	0.17	3
O00401	Neural Wiskott-Aldrich syndrome protein OS=Homo sapiens GN=WASL PE=1 SV=2 - [WASL_HUMAN]	WASL	575.52	32.28	1	13	13	26	505	54.8	7.93	1.098	0.135	23	28.8	1.141	0.19	23	27.1	0.162855	27.95	1.135	0.183	23	14.1	1.142	0.192	23	12.9	0.187134	13.5	1.245	0.316	23	25.4	1.141	0.19	23	26.2	0.254594	25.8	0	FALSE	FALSE	TRUE	FALSE	1.016	0.023	23
P54764	Ephrin type-A receptor 4 OS=Homo sapiens GN=EPHA4 PE=1 SV=1 - [EPHA4_HUMAN]	EPHA4	544.78	12.17	4	8	9	19	986	109.8	6.61	1.039	0.055	16	13.1	0.9	-0.152	16	9.6	-0.0446872	11.35	1.893	0.921	16	32.9	2	1	16	23.8	0.960882	28.35	1.958	0.969	16	18.8	1.831	0.873	16	27.2	0.921817	23	2	FALSE	FALSE	TRUE	FALSE	1.048	0.068	16
P29320	Ephrin type-A receptor 3 OS=Homo sapiens GN=EPHA3 PE=1 SV=2 - [EPHA3_HUMAN]	EPHA3	254.55	14.95	1	9	10	12	983	110.1	6.76	0.936	-0.095	10	15.5	1.013	0.019	10	25.3	-0.0372659	20.4	1.102	0.14	10	5.7	1.145	0.195	10	12.3	0.168	9	1.017	0.024	10	19.3	1.147	0.198	10	15.7	0.1137	17.5	0	FALSE	FALSE	TRUE	FALSE	0.927	-0.109	10
P29317	Ephrin type-A receptor 2 OS=Homo sapiens GN=EPHA2 PE=1 SV=2 - [EPHA2_HUMAN]	EPHA2	882.31	25.2	4	17	18	33	976	108.2	6.23	1.182	0.241	30	24	1.07	0.098	30	18.4	0.171207	21.2	0.811	-0.302	30	17.3	0.778	-0.362	30	14.8	-0.331881	16.05	0.942	-0.086	30	20.9	0.879	-0.186	30	24.5	-0.135269	22.7	6	FALSE	FALSE	TRUE	FALSE	1.034	0.048	30
P54756	Ephrin type-A receptor 5 OS=Homo sapiens GN=EPHA5 PE=1 SV=3 - [EPHA5_HUMAN]	EPHA5	93.57	3.95	1	2	3	5	1037	114.7	6.93	1.143	0.193	3	9.9	0.821	-0.285	3	16.2	-0.0262051	13.05	2.751	1.46	3	34.7	2.911	1.542	3	31.7	1.50131	33.2	3.117	1.64	3	57.2	2.153	1.106	3	36.7	1.3978	46.95	2	FALSE	FALSE	TRUE	FALSE	1.289	0.366	3
P54760	Ephrin type-B receptor 4 OS=Homo sapiens GN=EPHB4 PE=1 SV=2 - [EPHB4_HUMAN]	EPHB4	147.72	4.36	5	2	3	5	987	108.2	6.9	0.916	-0.127	2	5.1	0.996	-0.006	2	6.6	-0.0649175	5.85	0.957	-0.063	2	7.4	0.987	-0.019	2	11.8	-0.0409718	9.6	0.869	-0.203	2	12.5	0.978	-0.032	2	5.1	-0.114816	8.8		FALSE	FALSE	FALSE		0.962	-0.056	2
P98172	Ephrin-B1 OS=Homo sapiens GN=EFNB1 PE=1 SV=1 - [EFNB1_HUMAN]	EFNB1	481.88	31.5	1	8	8	21	346	38	8.94	1.016	0.023	21	10.7	1.081	0.112	21	17.4	0.0683269	14.05	1.044	0.062	21	9.5	1.113	0.154	21	10.2	0.109026	9.85	1.046	0.065	21	9.1	1.118	0.161	21	8.1	0.1137	8.6	0	FALSE	FALSE	TRUE	FALSE	0.907	-0.141	21
P52799	Ephrin-B2 OS=Homo sapiens GN=EFNB2 PE=1 SV=1 - [EFNB2_HUMAN]	EFNB2	322.13	25.53	1	6	6	13	333	36.9	8.85	0.774	-0.37	13	6.8	0.814	-0.297	13	13.6	-0.332789	10.2	1.136	0.184	13	7.3	1.114	0.156	13	17.4	0.169925	12.35	0.9	-0.152	13	10.8	0.88	-0.184	13	24	-0.168123	17.4	4	FALSE	FALSE	TRUE	FALSE	1.032	0.045	13
Q15768	Ephrin-B3 OS=Homo sapiens GN=EFNB3 PE=1 SV=1 - [EFNB3_HUMAN]	EFNB3	61.06	4.41	1	1	1	1	340	35.8	8.6	1.19	0.251	1	NA	1.147	0.198	1	NA	0.224658	NA	1.195	0.257	1	NA	1.447	0.533	1	NA	0.40163	NA	1.41	0.496	1	NA	1.651	0.723	1	NA	0.614003	NA		FALSE	FALSE	FALSE		0.996	-0.006	1
P29323	Ephrin type-B receptor 2 OS=Homo sapiens GN=EPHB2 PE=1 SV=5 - [EPHB2_HUMAN]	EPHB2	454.69	11.09	4	8	9	17	1055	117.4	6.55	1.103	0.141	14	16.3	1.02	0.029	14	12.5	0.0861044	14.4	1.449	0.535	14	11.8	1.579	0.659	14	23.8	0.598365	17.8	1.536	0.619	14	25.5	1.39	0.475	14	25	0.54893	25.25	1	FALSE	FALSE	TRUE	FALSE	1.093	0.128	14
Q9Y2X7	ARF GTPase-activating protein GIT1 OS=Homo sapiens GN=GIT1 PE=1 SV=2 - [GIT1_HUMAN]	GIT1	294.12	22.73	1	8	12	15	761	84.3	6.8	1.053	0.075	9	64.5	1.157	0.21	9	9.9	0.144046	37.2	1.094	0.13	9	23.6	1.012	0.017	9	20.7	0.0745054	22.15	1.142	0.192	9	43.1	0.993	-0.01	9	33.9	0.0942361	38.5	0	FALSE	FALSE	TRUE	FALSE	1.042	0.059	9
P09497	Clathrin light chain B OS=Homo sapiens GN=CLTB PE=1 SV=1 - [CLCB_HUMAN]	CLTB	642.89	33.62	1	7	7	26	229	25.2	4.64	0.958	-0.062	26	29.5	0.976	-0.035	26	27.5	-0.0484122	28.5	1.248	0.32	26	12.5	1.349	0.432	26	32.3	0.376846	22.4	1.168	0.224	26	29.9	1.336	0.418	26	29.3	0.324235	29.6	1	FALSE	FALSE	TRUE	FALSE	0.983	-0.025	26
P19105	Myosin regulatory light chain 12A OS=Homo sapiens GN=MYL12A PE=1 SV=2 - [ML12A_HUMAN]	MYL12A	2575.21	66.67	2	6	13	64	171	19.8	4.81	1.196	0.258	23	30.3	1.245	0.316	23	42.5	0.287472	36.4	0.895	-0.16	23	18.7	1.069	0.096	23	32.6	-0.0262051	25.65	0.955	-0.066	23	22.7	1.034	0.048	23	29.5	-0.00795672	26.1	0	FALSE	FALSE	TRUE	FALSE	1.008	0.011	23
Q9BQG0	Myb-binding protein 1A OS=Homo sapiens GN=MYBBP1A PE=1 SV=2 - [MBB1A_HUMAN]	MYBBP1A	502.73	17.92	1	19	19	26	1328	148.8	9.28	1.023	0.033	26	16.1	1.224	0.292	26	24	0.168	20.05	0.81	-0.304	26	19.8	0.717	-0.48	26	31.3	-0.3893	25.55	0.807	-0.309	26	20.6	0.851	-0.233	26	21.6	-0.270556	21.1	6	FALSE	FALSE	TRUE	FALSE	0.985	-0.022	26
Q9UIF9	Bromodomain adjacent to zinc finger domain protein 2A OS=Homo sapiens GN=BAZ2A PE=1 SV=4 - [BAZ2A_HUMAN]	BAZ2A	137.13	2.52	1	4	4	5	1905	211.1	6.64	1.296	0.374	5	25.5	1.512	0.596	5	13.6	0.489543	19.55	1.027	0.038	5	17.3	0.664	-0.591	5	11.9	-0.242123	14.6	1.135	0.183	5	7.2	0.988	-0.017	5	8.4	0.0861044	7.8		FALSE	FALSE	TRUE	TRUE	1.099	0.136	5
Q9UHR5	SAP30-binding protein OS=Homo sapiens GN=SAP30BP PE=1 SV=1 - [S30BP_HUMAN]	SAP30BP	311.11	23.05	1	6	6	13	308	33.8	4.84	1.021	0.03	13	28.6	0.808	-0.308	13	13.9	-0.128945	21.25	0.977	-0.034	13	11.1	1.097	0.134	13	6.7	0.0524159	8.9	0.948	-0.077	13	17.6	0.961	-0.057	13	15	-0.0671829	16.3	0	FALSE	FALSE	TRUE	FALSE	0.956	-0.065	13
Q02297	Pro-neuregulin-1, membrane-bound isoform OS=Homo sapiens GN=NRG1 PE=1 SV=3 - [NRG1_HUMAN]	NRG1	20.19	1.88	1	1	1	1	640	70.3	8.79	0.913	-0.131	1	NA	0.753	-0.409	1	NA	-0.263612	NA	0.932	-0.102	1	NA	1.046	0.065	1	NA	-0.0159576	NA	0.843	-0.246	1	NA	0.783	-0.353	1	NA	-0.298673	NA		FALSE	FALSE	FALSE		1.084	0.116	1
P05091	Aldehyde dehydrogenase, mitochondrial OS=Homo sapiens GN=ALDH2 PE=1 SV=2 - [ALDH2_HUMAN]	ALDH2	2632.9	58.99	3	29	30	89	517	56.3	7.05	1.338	0.42	88	25.5	1.306	0.385	88	34.2	0.402722	29.85	1.055	0.077	88	14	1.025	0.036	88	18.7	0.0565835	16.35	1.36	0.444	88	22.7	1.368	0.452	88	24.3	0.447844	23.5	3	FALSE	FALSE	TRUE	FALSE	1.027	0.038	88
P68104	Elongation factor 1-alpha 1 OS=Homo sapiens GN=EEF1A1 PE=1 SV=1 - [EF1A1_HUMAN]	EEF1A1	12147.7	60.82	2	18	32	488	462	50.1	9.01	0.883	-0.18	348	18.4	0.966	-0.05	348	25	-0.113255	21.7	0.786	-0.347	348	17.7	0.738	-0.438	348	22.6	-0.392137	20.15	0.701	-0.513	348	25	0.737	-0.44	348	25.1	-0.475936	25.05	5	FALSE	FALSE	TRUE	FALSE	0.975	-0.037	348
P24534	Elongation factor 1-beta OS=Homo sapiens GN=EEF1B2 PE=1 SV=3 - [EF1B_HUMAN]	EEF1B2	3285.55	57.78	1	11	15	115	225	24.7	4.67	0.83	-0.269	104	21.2	0.927	-0.109	104	27.6	-0.186886	24.4	0.808	-0.308	104	20.7	0.791	-0.338	104	20.3	-0.32283	20.5	0.707	-0.5	104	32.5	0.757	-0.402	104	23.6	-0.450084	28.05	5	FALSE	FALSE	TRUE	FALSE	0.949	-0.076	104
Q05639	Elongation factor 1-alpha 2 OS=Homo sapiens GN=EEF1A2 PE=1 SV=1 - [EF1A2_HUMAN]	EEF1A2	3784.84	50.97	1	11	25	191	463	50.4	9.03	1.304	0.383	57	23.6	1.307	0.386	57	17.1	0.384602	20.35	1.339	0.421	57	15.9	1.489	0.574	57	14.1	0.499782	15	1.76	0.816	57	34.6	1.863	0.898	57	40.1	0.857185	37.35	2	FALSE	FALSE	TRUE	FALSE	1.021	0.03	57
P29692	Elongation factor 1-delta OS=Homo sapiens GN=EEF1D PE=1 SV=5 - [EF1D_HUMAN]	EEF1D	2351.49	71.17	1	20	24	97	281	31.1	5.01	0.967	-0.048	86	47.2	0.998	-0.003	86	49.5	-0.0254707	48.35	0.846	-0.241	86	31.6	0.819	-0.288	86	30.3	-0.264478	30.95	0.841	-0.25	86	39.8	0.859	-0.219	86	22.9	-0.234465	31.35	0	FALSE	FALSE	TRUE	FALSE	0.99	-0.014	86
P26641	Elongation factor 1-gamma OS=Homo sapiens GN=EEF1G PE=1 SV=3 - [EF1G_HUMAN]	EEF1G	3550.93	62.7	1	36	36	148	437	50.1	6.67	0.94	-0.089	145	30	0.969	-0.045	145	34.8	-0.0671829	32.4	0.799	-0.324	145	21.3	0.823	-0.281	145	18.9	-0.302226	20.1	0.723	-0.468	145	28.7	0.776	-0.366	145	26	-0.416	27.35	5	FALSE	FALSE	TRUE	FALSE	0.969	-0.045	145
P07858	Cathepsin B OS=Homo sapiens GN=CTSB PE=1 SV=3 - [CATB_HUMAN]	CTSB	1234.36	39.23	1	11	11	46	339	37.8	6.3	0.963	-0.054	46	21.1	0.988	-0.017	46	15.1	-0.0357862	18.1	1.249	0.321	46	14.3	1.477	0.563	46	17.6	0.446786	15.95	1.236	0.306	46	18.1	1.391	0.476	46	20.9	0.393416	19.5	1	FALSE	FALSE	TRUE	FALSE	0.97	-0.044	46
P39060	Collagen alpha-1(XVIII) chain OS=Homo sapiens GN=COL18A1 PE=1 SV=5 - [COIA1_HUMAN]	COL18A1	170.01	5.02	1	6	6	10	1754	178.1	6.01	1.322	0.403	10	37.6	1.658	0.729	10	32.2	0.575312	34.9	1.094	0.13	10	20.5	1.115	0.157	10	24.2	0.143393	22.35	1.465	0.551	10	41.9	1.581	0.661	10	44.4	0.606916	43.15	3	FALSE	FALSE	TRUE	FALSE	1.042	0.059	10
P56199	Integrin alpha-1 OS=Homo sapiens GN=ITGA1 PE=1 SV=2 - [ITA1_HUMAN]	ITGA1	22.89	1.61	1	1	2	4	1179	130.8	6.29	1.034	0.048	1	NA	0.885	-0.176	1	NA	-0.0596453	NA	1.196	0.258	1	NA	1.203	0.267	1	NA	0.262433	NA	1.227	0.295	1	NA	1.06	0.084	1	NA	0.193456	NA		FALSE	FALSE	FALSE		1.03	0.043	1
Q8IVL5	Prolyl 3-hydroxylase 2 OS=Homo sapiens GN=P3H2 PE=1 SV=1 - [P3H2_HUMAN]	P3H2	43.27	2.54	1	2	2	3	708	80.9	5.71	1.07	0.098	3	11.9	0.932	-0.102	3	0.8	0.00144197	6.35	1.004	0.006	3	5.7	0.896	-0.158	3	6.7	-0.0740006	6.2	1.106	0.145	3	17.7	0.832	-0.265	3	5.9	-0.0454314	11.8	0	FALSE	FALSE	TRUE	FALSE	1.309	0.388	3
Q8IYK4	Procollagen galactosyltransferase 2 OS=Homo sapiens GN=COLGALT2 PE=1 SV=1 - [GT252_HUMAN]	COLGALT2	78.58	7.19	1	2	3	4	626	72.9	6.2	0.948	-0.077	2	13.6	1.032	0.045	2	16	-0.0144996	14.8	1.012	0.017	2	4	0.954	-0.068	2	47.8	-0.0247367	25.9	0.951	-0.072	2	17.7	0.979	-0.031	2	30.1	-0.0513992	23.9		FALSE	FALSE	FALSE		1.036	0.051	2
Q8NBJ5	Procollagen galactosyltransferase 1 OS=Homo sapiens GN=COLGALT1 PE=1 SV=1 - [GT251_HUMAN]	COLGALT1	538.56	35.21	1	21	22	36	622	71.6	7.31	1.074	0.103	34	34.5	1.138	0.187	34	31.1	0.145351	32.8	0.958	-0.062	34	10.6	0.87	-0.201	34	23.7	-0.129734	17.15	1.05	0.07	34	16.1	1.015	0.021	34	22.8	0.0461418	19.45	0	FALSE	FALSE	TRUE	FALSE	1.021	0.03	34
Q02809	Procollagen-lysine,2-oxoglutarate 5-dioxygenase 1 OS=Homo sapiens GN=PLOD1 PE=1 SV=2 - [PLOD1_HUMAN]	PLOD1	1486.27	31.77	1	17	18	48	727	83.5	6.95	1.042	0.059	46	18.3	1.072	0.1	46	24	0.0799754	21.15	1.004	0.006	46	15.7	0.878	-0.188	46	18.6	-0.0877334	17.15	1.063	0.088	46	17.5	0.957	-0.063	46	12.8	0.0143553	15.15	0	FALSE	FALSE	TRUE	FALSE	1.057	0.08	46
Q8IVL6	Prolyl 3-hydroxylase 3 OS=Homo sapiens GN=P3H3 PE=1 SV=1 - [P3H3_HUMAN]	P3H3	97.09	6.25	1	4	4	5	736	81.8	6.32	1.073	0.102	5	19.6	1.006	0.009	5	22.7	0.0558898	21.15	1.199	0.262	5	23.3	1.204	0.268	5	3.9	0.264837	13.6	1.275	0.35	5	20.5	1.096	0.132	5	18	0.245496	19.25	0	FALSE	FALSE	TRUE	FALSE	1.075	0.104	5
O00469	Procollagen-lysine,2-oxoglutarate 5-dioxygenase 2 OS=Homo sapiens GN=PLOD2 PE=1 SV=2 - [PLOD2_HUMAN]	PLOD2	112.28	4.75	1	2	2	4	737	84.6	6.71	1.132	0.179	4	1.7	1.129	0.175	4	11.6	0.176961	6.65	0.988	-0.017	4	3.6	0.952	-0.071	4	9.9	-0.0439433	6.75	1.081	0.112	4	3.9	1.109	0.149	4	3.2	0.130931	3.55	0	FALSE	FALSE	TRUE	FALSE	0.998	-0.003	4
Q9UKZ9	Procollagen C-endopeptidase enhancer 2 OS=Homo sapiens GN=PCOLCE2 PE=1 SV=1 - [PCOC2_HUMAN]	PCOLCE2	0	1.45	2	1	1	4	415	45.7	8.47	NA	NA	NA	NA	NA	NA	NA	NA	NA	NA	NA	NA	NA	NA	NA	NA	NA	NA	NA	NA	NA	NA	NA	NA	NA	NA	NA	NA	NA	NA		TRUE	FALSE			NA	NA	NA
O60568	Procollagen-lysine,2-oxoglutarate 5-dioxygenase 3 OS=Homo sapiens GN=PLOD3 PE=1 SV=1 - [PLOD3_HUMAN]	PLOD3	382.92	27.51	1	16	16	22	738	84.7	6.05	1.002	0.003	22	31.5	1.081	0.112	22	29.9	0.0586628	30.7	1.041	0.058	22	16.4	0.967	-0.048	22	23.5	0.00575927	19.95	1.006	0.009	22	25	0.955	-0.066	22	14.8	-0.0284105	19.9	0	FALSE	FALSE	TRUE	FALSE	1.054	0.076	22
P50454	Serpin H1 OS=Homo sapiens GN=SERPINH1 PE=1 SV=2 - [SERPH_HUMAN]	SERPINH1	4675.91	63.16	1	26	26	164	418	46.4	8.69	0.925	-0.112	163	25	1.01	0.014	163	23.8	-0.0476664	24.4	0.943	-0.085	163	17.3	0.792	-0.336	163	22.8	-0.205064	20.05	0.838	-0.255	163	20.1	0.794	-0.333	163	19.5	-0.293359	19.8	0	FALSE	FALSE	TRUE	FALSE	1.034	0.048	163
O75718	Cartilage-associated protein OS=Homo sapiens GN=CRTAP PE=1 SV=1 - [CRTAP_HUMAN]	CRTAP	218.72	24.69	1	10	10	13	401	46.5	5.73	0.94	-0.089	13	18.1	1.025	0.036	13	20.3	-0.0254707	19.2	0.988	-0.017	13	13.2	0.836	-0.258	13	20.2	-0.132894	16.7	0.942	-0.086	13	15.5	0.834	-0.262	13	19.9	-0.171368	17.7	0	FALSE	FALSE	TRUE	FALSE	1.04	0.057	13
P13674	Prolyl 4-hydroxylase subunit alpha-1 OS=Homo sapiens GN=P4HA1 PE=1 SV=2 - [P4HA1_HUMAN]	P4HA1	1031.9	46.82	1	22	22	43	534	61	6.01	0.929	-0.106	43	21.2	0.941	-0.088	43	26.7	-0.0969617	23.95	1.029	0.041	43	15.2	1.018	0.026	43	19.6	0.0335111	17.4	0.998	-0.003	43	18.2	0.954	-0.068	43	25.4	-0.0350469	21.8	0	FALSE	FALSE	TRUE	FALSE	1.061	0.085	43
O15460	Prolyl 4-hydroxylase subunit alpha-2 OS=Homo sapiens GN=P4HA2 PE=1 SV=1 - [P4HA2_HUMAN]	P4HA2	200.95	14.95	1	7	7	10	535	60.9	5.71	1.054	0.076	10	20.1	1.09	0.124	10	4.3	0.100305	12.2	1.102	0.14	10	11.5	1.105	0.144	10	9.4	0.142087	10.45	1.132	0.179	10	19.9	1.186	0.246	10	9.9	0.212881	14.9	0	FALSE	FALSE	TRUE	FALSE	1.076	0.106	10
Q32P28	Prolyl 3-hydroxylase 1 OS=Homo sapiens GN=P3H1 PE=1 SV=2 - [P3H1_HUMAN]	P3H1	356.67	18.07	1	12	12	18	736	83.3	5.14	0.894	-0.162	18	25.4	0.957	-0.063	18	32.8	-0.111695	29.1	1.066	0.092	18	10.1	0.959	-0.06	18	16.2	0.0179219	13.15	0.932	-0.102	18	22	0.907	-0.141	18	16.4	-0.121079	19.2	0	FALSE	FALSE	TRUE	FALSE	1.068	0.095	18
P23284	Peptidyl-prolyl cis-trans isomerase B OS=Homo sapiens GN=PPIB PE=1 SV=2 - [PPIB_HUMAN]	PPIB	1863.09	64.35	1	15	16	106	216	23.7	9.41	0.968	-0.047	101	18.1	0.942	-0.086	101	17.5	-0.0664274	17.8	0.863	-0.213	101	18.6	0.889	-0.17	101	17.1	-0.190997	17.85	0.861	-0.216	101	22.2	0.881	-0.183	101	25.7	-0.199255	23.95	0	FALSE	FALSE	TRUE	FALSE	1.021	0.03	101
O75808	Calpain-15 OS=Homo sapiens GN=CAPN15 PE=1 SV=1 - [CAN15_HUMAN]	CAPN15	21.5	1.01	1	1	1	1	1086	117.2	6.71	1.043	0.061	1	NA	1.316	0.396	1	NA	0.238175	NA	0.915	-0.128	1	NA	0.893	-0.163	1	NA	-0.145605	NA	0.945	-0.082	1	NA	1.169	0.225	1	NA	0.0799754	NA		FALSE	FALSE	FALSE		0.87	-0.201	1
O15484	Calpain-5 OS=Homo sapiens GN=CAPN5 PE=1 SV=2 - [CAN5_HUMAN]	CAPN5	458.03	14.22	1	8	8	17	640	73.1	7.64	1.191	0.252	17	15.9	1.21	0.275	17	17.5	0.263635	16.7	1.258	0.331	17	13.1	1.23	0.299	17	12.5	0.314986	12.8	1.478	0.564	17	16.4	1.402	0.487	17	17.9	0.526069	17.15	1	FALSE	FALSE	TRUE	FALSE	1.002	0.003	17
Q92743	Serine protease HTRA1 OS=Homo sapiens GN=HTRA1 PE=1 SV=1 - [HTRA1_HUMAN]	HTRA1	137.2	19.58	1	7	7	7	480	51.3	7.83	1.326	0.407	7	9.3	1.236	0.306	7	16.4	0.35727	12.85	0.987	-0.019	7	7.2	1.055	0.077	7	14.1	0.0299829	10.65	1.289	0.366	7	9.7	1.294	0.372	7	3	0.369048	6.35	3	FALSE	FALSE	TRUE	FALSE	0.994	-0.009	7
Q8IX30	Signal peptide, CUB and EGF-like domain-containing protein 3 OS=Homo sapiens GN=SCUBE3 PE=1 SV=1 - [SCUB3_HUMAN]	SCUBE3	62.12	5.14	1	5	5	5	993	109.2	7.56	1.181	0.24	5	15.2	1.154	0.207	5	20.1	0.223423	17.65	0.893	-0.163	5	4.3	0.909	-0.138	5	11.3	-0.150401	7.8	1.027	0.038	5	15.7	0.92	-0.12	5	16.4	-0.0387471	16.05	0	FALSE	FALSE	TRUE	FALSE	1.045	0.064	5
Q8IWY4	Signal peptide, CUB and EGF-like domain-containing protein 1 OS=Homo sapiens GN=SCUBE1 PE=1 SV=3 - [SCUB1_HUMAN]	SCUBE1	182.26	10.22	2	7	7	7	988	107.8	6.83	1.014	0.02	7	18.3	1.061	0.085	7	18.9	0.0531113	18.6	1.053	0.075	7	25	0.878	-0.188	7	8.4	-0.0506518	16.7	0.952	-0.071	7	9.3	1.009	0.013	7	5.8	-0.0284105	7.55	0	FALSE	FALSE	TRUE	FALSE	0.956	-0.065	7
Q9Y6W3	Calpain-7 OS=Homo sapiens GN=CAPN7 PE=1 SV=1 - [CAN7_HUMAN]	CAPN7	149.63	9.96	1	6	6	6	813	92.6	7.65	0.966	-0.05	5	19.3	0.811	-0.302	5	53.3	-0.170556	36.3	1.304	0.383	5	13.5	0.927	-0.109	5	13.5	0.157691	13.5	1.161	0.215	5	29.5	1.048	0.068	5	24.3	0.143393	26.9	0	FALSE	FALSE	TRUE	FALSE	1.061	0.085	5
P18084	Integrin beta-5 OS=Homo sapiens GN=ITGB5 PE=1 SV=1 - [ITB5_HUMAN]	ITGB5	146.07	11.51	3	6	6	6	799	88	6.06	1.018	0.026	5	49.6	1.242	0.313	5	25.5	0.176323	37.55	0.929	-0.106	5	14.8	0.883	-0.18	5	32.5	-0.142417	23.65	1.045	0.064	5	60.7	0.811	-0.302	5	6	-0.107803	33.35	0	FALSE	FALSE	TRUE	FALSE	1.215	0.281	5
Q14031	Collagen alpha-6(IV) chain OS=Homo sapiens GN=COL4A6 PE=1 SV=3 - [CO4A6_HUMAN]	COL4A6	55.93	2.37	1	3	3	3	1691	163.7	9.2	0.943	-0.085	3	23	0.793	-0.335	3	0.6	-0.204233	11.8	0.736	-0.442	3	22.3	0.713	-0.488	3	37.5	-0.464942	29.9	0.803	-0.317	3	26	0.74	-0.434	3	32	-0.374262	29	5	FALSE	FALSE	TRUE	FALSE	0.967	-0.048	3
P24821	Tenascin OS=Homo sapiens GN=TNC PE=1 SV=3 - [TENA_HUMAN]	TNC	1341.01	16.54	1	30	30	53	2201	240.7	4.89	1.27	0.345	53	28.6	1.363	0.447	53	37.4	0.396708	33	1.007	0.01	53	12.4	1.087	0.12	53	17.5	0.0662614	14.95	1.299	0.377	53	28.7	1.437	0.523	53	33.4	0.452068	31.05	3	FALSE	FALSE	TRUE	FALSE	1.013	0.019	53
P08253	72 kDa type IV collagenase OS=Homo sapiens GN=MMP2 PE=1 SV=2 - [MMP2_HUMAN]	MMP2	159.25	5.76	1	2	2	4	660	73.8	5.47	0.854	-0.228	4	7.3	0.895	-0.16	4	8.2	-0.19347	7.75	0.932	-0.102	4	10.1	1.023	0.033	4	15.7	-0.0328314	12.9	0.788	-0.344	4	17.5	0.86	-0.218	4	5.3	-0.279284	11.4	0	FALSE	FALSE	TRUE	FALSE	1.012	0.017	4
P19320	Vascular cell adhesion protein 1 OS=Homo sapiens GN=VCAM1 PE=1 SV=1 - [VCAM1_HUMAN]	VCAM1	73.13	5.41	1	3	3	3	739	81.2	5.22	0.778	-0.362	3	13.7	0.803	-0.317	3	22.4	-0.339163	18.05	1.02	0.029	3	10	1.115	0.157	3	11.1	0.0942361	10.55	0.769	-0.379	3	6.5	0.887	-0.173	3	0.6	-0.272297	3.55	4	FALSE	FALSE	TRUE	FALSE	0.914	-0.13	3
P05362	Intercellular adhesion molecule 1 OS=Homo sapiens GN=ICAM1 PE=1 SV=2 - [ICAM1_HUMAN]	ICAM1	75.76	8.65	1	4	4	4	532	57.8	7.99	1.412	0.498	4	21.2	1.331	0.413	4	6.4	0.455755	13.8	1.447	0.533	4	17.6	1.337	0.419	4	24.2	0.477159	20.9	1.976	0.983	4	31.7	1.77	0.824	4	30.9	0.905351	31.3	2	FALSE	FALSE	TRUE	FALSE	1.125	0.17	4
Q13444	Disintegrin and metalloproteinase domain-containing protein 15 OS=Homo sapiens GN=ADAM15 PE=1 SV=4 - [ADA15_HUMAN]	ADAM15	32.22	1.74	1	1	1	1	863	92.9	6.73	0.996	-0.006	1	NA	1.084	0.116	1	NA	0.0565835	NA	0.971	-0.042	1	NA	0.657	-0.606	1	NA	-0.296899	NA	0.959	-0.06	1	NA	0.709	-0.496	1	NA	-0.261881	NA		FALSE	FALSE	FALSE		1.149	0.2	1
P07384	Calpain-1 catalytic subunit OS=Homo sapiens GN=CAPN1 PE=1 SV=1 - [CAN1_HUMAN]	CAPN1	1346.27	46.22	1	27	27	60	714	81.8	5.67	1.126	0.171	59	25.1	1.189	0.25	59	23.1	0.211012	24.1	1.14	0.189	59	15.5	1.199	0.262	59	13.9	0.225892	14.7	1.267	0.341	59	17.1	1.376	0.46	59	24.7	0.402176	20.9	1	FALSE	FALSE	TRUE	FALSE	0.968	-0.047	59
Q08345	Epithelial discoidin domain-containing receptor 1 OS=Homo sapiens GN=DDR1 PE=1 SV=1 - [DDR1_HUMAN]	DDR1	277.77	11.94	1	7	7	9	913	101.1	6.83	0.991	-0.013	9	18	1.146	0.197	9	16.1	0.0955869	17.05	0.96	-0.059	9	18.8	0.872	-0.198	9	16.1	-0.12658	17.45	0.947	-0.079	9	17.1	1.025	0.036	9	7.4	-0.0203404	12.25	0	FALSE	FALSE	TRUE	FALSE	0.939	-0.091	9
P01033	Metalloproteinase inhibitor 1 OS=Homo sapiens GN=TIMP1 PE=1 SV=1 - [TIMP1_HUMAN]	TIMP1	87.1	15.46	1	2	2	2	207	23.2	8.1	0.906	-0.142	2	1.2	0.832	-0.265	2	5.2	-0.202572	3.2	0.988	-0.017	2	7.2	0.985	-0.022	2	5.3	-0.019609	6.25	0.888	-0.171	2	6	0.815	-0.295	2	0.1	-0.231922	3.05		FALSE	FALSE	FALSE		1.06	0.084	2
P09486	SPARC OS=Homo sapiens GN=SPARC PE=1 SV=1 - [SPRC_HUMAN]	SPARC	1619.43	41.25	1	9	9	46	303	34.6	4.84	0.919	-0.122	46	30.3	1.049	0.069	46	40	-0.0232698	35.15	1.046	0.065	46	24.3	1.094	0.13	46	30.3	0.0976108	27.3	0.97	-0.044	46	20.4	1.097	0.134	46	25.2	0.0475384	22.8	0	FALSE	FALSE	TRUE	FALSE	1.023	0.033	46
Q9Y296	Trafficking protein particle complex subunit 4 OS=Homo sapiens GN=TRAPPC4 PE=1 SV=1 - [TPPC4_HUMAN]	TRAPPC4	240.15	29.68	1	6	6	14	219	24.3	6.21	1.183	0.242	13	20.1	1.316	0.396	13	25.1	0.321351	22.6	0.951	-0.072	13	17	0.898	-0.155	13	11.8	-0.113255	14.4	1.101	0.139	13	10.3	1.238	0.308	13	18.8	0.225892	14.55	3	FALSE	FALSE	TRUE	FALSE	0.851	-0.233	13
P68871	Hemoglobin subunit beta OS=Homo sapiens GN=HBB PE=1 SV=2 - [HBB_HUMAN]	HBB	2570.82	84.35	4	5	12	83	147	16	7.28	1.285	0.362	50	20.2	1.157	0.21	50	35.3	0.288063	27.75	0.902	-0.149	50	17.4	0.982	-0.026	50	21.5	-0.086201	19.45	1.099	0.136	50	20.3	1.083	0.115	50	19.5	0.125651	19.9	0	FALSE	FALSE	TRUE	FALSE	1.044	0.062	50
P53007	Tricarboxylate transport protein, mitochondrial OS=Homo sapiens GN=SLC25A1 PE=1 SV=2 - [TXTP_HUMAN]	SLC25A1	129.41	24.12	1	7	7	9	311	34	9.89	1.068	0.095	9	20	1.481	0.567	9	40	0.349931	30	0.941	-0.088	9	22.2	0.736	-0.442	9	20.9	-0.254117	21.55	1.054	0.076	9	11.4	0.943	-0.085	9	18.5	-0.00216567	14.95	6	FALSE	FALSE	TRUE	FALSE	1.057	0.08	9
Q9BW60	Elongation of very long chain fatty acids protein 1 OS=Homo sapiens GN=ELOVL1 PE=1 SV=1 - [ELOV1_HUMAN]	ELOVL1	156.07	8.96	1	2	2	3	279	32.6	9.6	1.006	0.009	3	14.8	1.657	0.729	3	6.1	0.413052	10.45	0.997	-0.004	3	1.9	0.582	-0.781	3	27.3	-0.340989	14.6	1.079	0.11	3	2.6	0.842	-0.248	3	7.5	-0.0581425	5.05		FALSE	FALSE	TRUE	TRUE	1.143	0.193	3
Q9NYP7	Elongation of very long chain fatty acids protein 5 OS=Homo sapiens GN=ELOVL5 PE=1 SV=1 - [ELOV5_HUMAN]	ELOVL5	90.57	4.35	1	1	1	3	299	35.3	9.42	1.024	0.034	3	2.2	1.572	0.653	3	2.9	0.37629	2.55	0.772	-0.373	3	9.4	0.449	-1.155	3	14.5	-0.711937	11.95	0.783	-0.353	3	21	0.835	-0.26	3	17.1	-0.305788	19.05		FALSE	FALSE	TRUE	TRUE	0.895	-0.16	3
Q53GQ0	Very-long-chain 3-oxoacyl-CoA reductase OS=Homo sapiens GN=HSD17B12 PE=1 SV=2 - [DHB12_HUMAN]	HSD17B12	437.5	32.37	1	10	10	18	312	34.3	9.32	1.141	0.19	18	16.1	1.44	0.526	18	29.5	0.36793	22.8	1.12	0.163	18	18.6	1.012	0.017	18	13.9	0.0922074	16.25	1.397	0.482	18	12.6	1.287	0.364	18	21.2	0.424385	16.9	3	FALSE	FALSE	TRUE	FALSE	0.989	-0.016	18
Q86SK9	Stearoyl-CoA desaturase 5 OS=Homo sapiens GN=SCD5 PE=1 SV=2 - [SCD5_HUMAN]	SCD5	95.27	13.33	1	3	3	3	330	37.6	9.61	1.371	0.455	3	15.7	1.692	0.759	3	13.3	0.614945	14.5	1.466	0.552	3	7	1.362	0.446	3	37.8	0.499782	22.4	2.09	1.064	3	4.4	2.223	1.153	3	4.6	1.10869	4.5	2	FALSE	FALSE	TRUE	FALSE	1.095	0.131	3
P50897	Palmitoyl-protein thioesterase 1 OS=Homo sapiens GN=PPT1 PE=1 SV=1 - [PPT1_HUMAN]	PPT1	409.68	25.49	1	7	7	15	306	34.2	6.52	0.994	-0.009	15	23.8	0.976	-0.035	15	16.2	-0.0218044	20	1.072	0.1	15	13.6	1.174	0.231	15	12.8	0.167358	13.2	1.043	0.061	15	8.8	1.206	0.27	15	16	0.169284	12.4	0	FALSE	FALSE	TRUE	FALSE	0.956	-0.065	15
Q9Y6X9	MORC family CW-type zinc finger protein 2 OS=Homo sapiens GN=MORC2 PE=1 SV=2 - [MORC2_HUMAN]	MORC2	324.24	15.7	2	12	12	14	1032	117.7	8.38	0.991	-0.013	14	20.4	1.033	0.047	14	13.9	0.0172093	17.15	1.066	0.092	14	14	0.992	-0.012	14	18.1	0.041243	16.05	1.065	0.091	14	16.2	1.093	0.128	14	20.6	0.109695	18.4	0	FALSE	FALSE	TRUE	FALSE	1.033	0.047	14
Q8N4T8	Carbonyl reductase family member 4 OS=Homo sapiens GN=CBR4 PE=1 SV=3 - [CBR4_HUMAN]	CBR4	78.57	5.06	1	1	1	2	237	25.3	9.33	0.928	-0.108	2	39	0.863	-0.213	2	45.6	-0.159235	42.3	0.998	-0.003	2	2.7	0.961	-0.057	2	6.1	-0.0298826	4.4	0.918	-0.123	2	42	0.825	-0.278	2	52.7	-0.198427	47.35		FALSE	FALSE	FALSE		1.044	0.062	2
O95059	Ribonuclease P protein subunit p14 OS=Homo sapiens GN=RPP14 PE=1 SV=3 - [RPP14_HUMAN]	RPP14	80.73	26.61	1	3	3	6	124	13.7	7.75	1	0	6	9.7	0.857	-0.223	6	10.9	-0.107026	10.3	0.976	-0.035	6	7.1	1.101	0.139	6	8.8	0.0545012	7.95	1.02	0.029	6	6.9	0.967	-0.048	6	5.6	-0.00940813	6.25	0	FALSE	FALSE	TRUE	FALSE	1.027	0.038	6
O60488	Long-chain-fatty-acid--CoA ligase 4 OS=Homo sapiens GN=ACSL4 PE=1 SV=2 - [ACSL4_HUMAN]	ACSL4	1013.76	31.5	1	15	17	38	711	79.1	8.38	0.975	-0.037	29	25.9	1.096	0.132	29	21.7	0.0503276	23.8	0.994	-0.009	29	9.4	0.962	-0.056	29	14.1	-0.0320936	11.75	0.962	-0.056	29	17.8	1.078	0.108	29	18.7	0.0285692	18.25	0	FALSE	FALSE	TRUE	FALSE	0.977	-0.034	29
Q6Y1H2	Very-long-chain (3R)-3-hydroxyacyl-CoA dehydratase 2 OS=Homo sapiens GN=HACD2 PE=1 SV=1 - [HACD2_HUMAN]	HACD2	65.27	3.94	1	1	1	1	254	28.4	9.55	0.966	-0.05	1	NA	0.881	-0.183	1	NA	-0.114816	NA	0.96	-0.059	1	NA	0.825	-0.278	1	NA	-0.164076	NA	0.919	-0.122	1	NA	0.724	-0.466	1	NA	-0.283668	NA		FALSE	FALSE	FALSE		1.148	0.199	1
O95573	Long-chain-fatty-acid--CoA ligase 3 OS=Homo sapiens GN=ACSL3 PE=1 SV=3 - [ACSL3_HUMAN]	ACSL3	1154.93	34.31	1	18	20	43	720	80.4	8.38	0.901	-0.15	34	23.1	1.123	0.167	34	21.4	0.0172093	22.25	1.046	0.065	34	9.5	0.86	-0.218	34	9.4	-0.0694519	9.45	1.01	0.014	34	25.8	0.947	-0.079	34	23	-0.0313562	24.4	0	FALSE	FALSE	TRUE	FALSE	1.037	0.052	34
Q9P035	Very-long-chain (3R)-3-hydroxyacyl-CoA dehydratase 3 OS=Homo sapiens GN=HACD3 PE=1 SV=2 - [HACD3_HUMAN]	HACD3	199.02	16.57	1	5	5	8	362	43.1	8.94	1.122	0.166	6	52.7	1.062	0.087	6	17.2	0.126973	34.95	0.989	-0.016	6	2.9	1.026	0.037	6	11	0.0107798	6.95	1	0	6	36.8	1.084	0.116	6	27.9	0.0593553	32.35	0	FALSE	FALSE	TRUE	FALSE	1.058	0.081	6
Q4G176	Acyl-CoA synthetase family member 3, mitochondrial OS=Homo sapiens GN=ACSF3 PE=1 SV=3 - [ACSF3_HUMAN]	ACSF3	99.15	10.42	1	5	6	7	576	64.1	8.37	1.197	0.259	6	21.6	1.143	0.193	6	15.9	0.226509	18.75	0.974	-0.038	6	10	1.011	0.016	6	4.3	-0.010861	7.15	1.11	0.151	6	7.6	1.156	0.209	6	17.3	0.180148	12.45	0	FALSE	FALSE	TRUE	FALSE	0.967	-0.048	6
Q9NZ01	Very-long-chain enoyl-CoA reductase OS=Homo sapiens GN=TECR PE=1 SV=1 - [TECR_HUMAN]	TECR	155.6	12.66	1	5	5	12	308	36	9.45	0.923	-0.116	12	10.1	1.082	0.114	12	14.1	0.00360224	12.1	1.054	0.076	12	12.4	0.829	-0.271	12	13.6	-0.086967	13	0.955	-0.066	12	14.8	0.874	-0.194	12	12.4	-0.128945	13.6	0	FALSE	FALSE	TRUE	FALSE	1.04	0.057	12
O00767	Acyl-CoA desaturase OS=Homo sapiens GN=SCD PE=1 SV=2 - [ACOD_HUMAN]	SCD	92.37	5.29	2	2	2	2	359	41.5	9	1.15	0.202	2	38.9	1.308	0.387	2	43.8	0.297485	41.35	0.922	-0.117	2	13.7	0.746	-0.423	2	21.4	-0.261881	17.55	1.05	0.07	2	24.3	0.971	-0.042	2	20.9	0.0150693	22.6		FALSE	FALSE	FALSE		1.124	0.169	2
[truncated: 6,323 more rows]
[truncated: 20 more columns]
