# Supplementary material for: Quantitative mapping of transcriptome and proteome dynamics during polarization of human iPSC-derived neurons
Source: bioRxiv preprint, doi:10.1101/2020.04.21.052498, version 1 (2020-04-21)
Supplement: Table 6 [file 052498_file12.xlsx]

## Sheet: Sheet 1
Gname	RNA	PROTEIN	sa.val
A1BG	-0.0720374	-0.0225369	0.307529
A2M	0.750191	0.38405	1.06501
AAAS	-0.57489	-0.0159576	0.768666
AACS	-0.449637	-0.0908029	0.735146
AADAT	-0.562166	-0.202572	0.874493
AAGAB	-0.267463	-0.955956	1.10608
AAK1	0.789636	0.189666	0.989597
AAMDC	-1.18941	0.015783	1.09781
AAMP	-0.0675497	-0.279284	0.588926
AAR2	-0.273036	-0.163268	0.660533
AARS2	-0.24159	-0.0528949	0.542665
AARS	0.590869	0.00647756	0.772882
AASDHPPT	0.367741	0.274411	0.801344
AASS	-0.506957	-0.0328314	0.734703
AATF	0.106968	-0.523878	0.794258
ABAT	0.517042	0.678523	1.09342
ABCB6	-0.0969726	-0.224317	0.566824
ABCB7	-0.674165	-0.0536434	0.853117
ABCB8	-0.814622	0.481299	1.13839
ABCC10	0.101168	0.428142	0.727537
ABCC1	-0.221289	0.544485	0.875086
ABCC4	-1.97726	-0.0709665	1.43116
ABCD2	0.0250508	0.267835	0.54119
ABCD3	-0.596313	0.0717627	0.817359
ABCE1	-0.926188	-0.350155	1.12975
ABCF1	-0.526745	-0.0558912	0.763306
ABCF2	0.108626	-0.290709	0.63193
ABCF3	-0.474861	-0.011588	0.697459
ABHD10	0.500209	0.232047	0.85572
ABHD11	-0.352087	0.0468403	0.631607
ABHD12	-0.00796429	0.115699	0.351658
ABHD13	-0.598537	0.208517	0.898362
ABHD14B	-1.25339	-0.0573917	1.14489
ABHD16A	-0.553244	0.0136409	0.752918
ABHD6	0.819028	0.566084	1.17691
ABI1	0.343794	0.015783	0.599647
ABI2	0.183229	0.0942361	0.52675
ABI3		0.365693
ABL1	-0.0100175	0.0391384	0.221711
ABL2	0.410607	0.170566	0.762347
ABLIM1	0.533819	0.112367	0.803857
ABRACL	0.33925	0.35558	0.833565
ABR	0.619967	0.390117	1.00503
ABT1	-0.0547021	-0.114035	0.410777
ACAA1	-0.143387	0.0384362	0.426408
ACAA2	-1.2533	0.0200577	1.12843
ACACA	0.751166	-0.237013	0.994072
ACAD10	-0.416057	0.215368	0.794622
ACAD8	0.0418138	0.259423	0.548851
ACAD9	-0.396557	0.265437	0.81363
ACADM	-0.31637	-0.0284105	0.58718
ACADSB	1.29298	-0.0476664	1.15786
ACADVL	-0.452339	0.187134	0.799671
ACAP2	-0.928056	-0.14003	1.03348
ACAP3	0.455899	0.418999	0.93536
ACAT1	-0.296955	0.0100637	0.554093
ACAT2	-0.0351306	-0.419855	0.674526
ACBD3	0.453621	-0.185245	0.799291
ACBD5	-0.120943	0.202888	0.569062
ACBD6	-0.101568	-0.0284105	0.360526
ACBD7	-0.743297	0.154454	0.947497
ACD	0.283155	-0.190174	0.687989
ACIN1	0.0113594	-0.0284105	0.199424
ACLY	-0.109494	-0.532199	0.801057
ACO1	0.106323	0.0363275	0.377691
ACO2	-0.683657	0.139469	0.907263
ACOT13	0.249792	0.217231	0.68339
ACOT7	0.848788	-0.147202	0.997993
ACOT8	-0.831318	0.0683269	0.948496
ACOT9	-0.909225	0.249142	1.07627
ACOX1	0.981211	0.487486	1.2119
ACOX3	-0.117825	0.260026	0.614696
ACP1	-0.525931	-0.0454314	0.755885
ACP2	0.338721	0.459956	0.893688
ACP6	-0.427073	-0.391191	0.904579
ACSF2	-1.83378	0.399445	1.4944
ACSF3	0.440319	0.180148	0.787697
ACSL1	1.13923	0.614003	1.3241
ACSL3	0.139232	-0.0313562	0.413023
ACSL4	1.05119	0.0285692	1.03912
ACSS2	-0.0341595	0.187768	0.471092
ACSS3	-0.124647	-0.265345	0.624493
ACTA1	-0.12632	-0.442222	0.754018
ACTA2	0.473338	0.399445	0.934228
ACTBL2		-0.164076
ACTB	-0.517507	0.0143553	0.729289
ACTG1	0.162805	0.0683269	0.480761
ACTL6A	-0.278015	0.0628125	0.583804
ACTL6B	2.42428	0.792439	1.79352
ACTN1	-0.50153	-0.553214	1.02701
ACTN4	-0.589077	-0.419855	1.00446
ACTR10	0.719057	0.526069	1.11585
ACTR1A	0.792241	0.567545	1.1661
ACTR1B	0.279045	0.424385	0.838707
ACTR2	0.164668	0.0765591	0.491149
ACTR3B	0.222037	0.121015	0.585707
ACTR3	0.0937903	0.0150693	0.329939
ACTR5	0.195063	-0.010861	0.453789
ACTR6	0.131297	0.204141	0.57917
ACTR8	-0.558314	-0.414076	0.986099
ACVR2A	0.636692	0.276199	0.955453
ACYP1	-0.494795	0.0738202	0.754066
ACYP2	-0.114305	-0.61595	0.85455
ADAL	-0.343565	0.255803	0.774189
ADAM10	-0.0197502	0.0306892	0.224587
ADAM15	-0.794319	-0.261881	1.02772
ADAM17	-0.464172	-0.522841	0.993485
ADAM9	-0.716214	-0.0573917	0.879548
ADAMTS15	-0.74287	-0.902389	1.28268
ADAMTS7	0.544685	0.239398	0.885484
ADARB1	0.0928758	0.109695	0.450079
ADAR	0.0790866	0.110363	0.435258
ADA	-1.03644	0.0398403	1.03744
ADCY6	-0.249844	0.193456	0.665808
ADD1	0.400143	0.31904	0.848046
ADD2	1.19328	0.793688	1.4096
ADD3	-0.937874	-0.221791	1.07688
ADH5	-0.582136	0.36233	0.971836
ADI1	-0.462249	-0.678072	1.06786
ADK	-0.757851	0.0915306	0.921619
ADM	0.112046	-0.456999	0.754351
ADNP2	-0.285766	-0.211732	0.705335
ADNP	0.0217908	-0.00723157	0.17036
ADO	-0.316629	0.0503276	0.605769
ADPGK	-0.359989	0.0820213	0.664838
ADPRHL2	0.12263	0.0193461	0.376797
ADRA2A	1.82089	2.49083	2.07647
ADRM1	-0.391821	-0.433428	0.908432
ADSL	-0.47566	-0.14003	0.784659
ADSS	0.413438	-0.254117	0.817041
AEBP2	-0.56076	-0.00505829	0.752209
AES	0.69365	0.792022	1.21888
AFAP1	1.33149	0.732052	1.4365
AFF4	0.289756	0.245496	0.731609
AFG3L2	-0.221166	-0.123434	0.587026
AFTPH	0.25275	0.128293	0.617287
AGAP1	0.709859	0.626205	1.15588
AGAP3	0.96124	0.238787	1.09546
AGFG1	0.246414	0.24062	0.697878
AGGF1	-0.286565	-0.00505829	0.540021
AGK	-0.00170668	0.480782	0.694614
AGL	-0.262938	0.138814	0.633839
AGPAT1	0.475676	0.660381	1.06586
AGPAT3	-0.0103378	0.121679	0.363341
AGPAT4	0.171006	0.219711	0.625073
AGPAT5	-0.205962	-0.0335695	0.48942
AGPS	-0.362257	-0.136062	0.705917
AGRN	-0.32804	0.62854	0.978049
AGTPBP1	0.0504206	0.500292	0.7421
AGTRAP	-1.92261	-0.441243	1.53748
AHCTF1	-0.701502	0.187134	0.942675
AHCYL1	-0.683148	0.0475384	0.854802
AHCYL2	0.788547	0.245496	1.01688
AHCY	-0.768691	-0.116379	0.940782
AHDC1	0.205476	0.202261	0.638543
AHNAK2	1.00075	0.144046	1.06995
AHNAK	-0.972823	-0.27666	1.1178
AHSA1	0.467333	-0.463947	0.965028
AHSG	1.36761	-0.0137711	1.17532
AIDA	-0.542592	0.0908534	0.795893
AIF1L	-2.09569	-0.114816	1.48678
AIFM1	-0.388129	0.00575927	0.627605
AIM1	-0.0101708	0.123004	0.364931
AIMP1	-0.185808	-0.184425	0.608467
AIMP2	-0.606111	-0.266212	0.933982
AIP	0.254862	0.10165	0.597086
AJUBA	-1.62905	-0.702515	1.52695
AK1	1.02808	0.769349	1.34068
AK2	-0.920628	-0.175436	1.04693
AK3	-0.484633	0.155749	0.800239
AK4	-1.39039	0.217231	1.26792
AK5	-1.51423	-1.81604	1.8249
AKAP10	-0.316228	-0.0269398	0.585805
AKAP11	0.797943	-0.358454	1.07536
AKAP12	-0.331057	-0.274041	0.77788
AKAP13	0.0626706	-0.104697	0.409106
AKAP1	-0.500828	0.0662614	0.753053
AKAP5	0.395948	0.573859	0.984788
AKAP8L	-0.372848	-0.018878	0.62588
AKAP8	-0.329999	-0.185245	0.717805
AKAP9	0.938365	0.276794	1.10234
AKNA	-0.124786	0.195977	0.566359
AKR1A1	-0.372903	0.269033	0.801209
AKR1B1	-0.0997424	-0.0992781	0.446117
AKR1C2	1.87244	1.11603	1.72872
AKR1C3	-0.105124	1.74416	1.35988
AKR7A2	-0.609061	-0.0174171	0.791504
AKT1S1	-0.271552	-0.237013	0.713138
AKT1	-0.0506084	0.477159	0.726476
AKT2	0.018886	0.164143	0.427819
AKT3	0.171864	0.546462	0.847541
AKTIP	0.665624	0.458382	1.06019
ALAD	0.128054	0.16543	0.541741
ALAS1	0.232035	-0.358454	0.768433
ALB		0.680774
ALCAM	-0.0018597	-0.24127	0.493082
ALDH16A1	-0.92127	-0.155213	1.03754
ALDH18A1	-0.16035	-0.209228	0.60793
ALDH1B1	0.0327273	0.280362	0.559544
ALDH1L2	-0.162481	0.301002	0.680796
ALDH2	0.243443	0.447844	0.831436
ALDH3A2	-0.570257	0.313246	0.939948
ALDH4A1	-1.24703	0.210389	1.20723
ALDH5A1	0.251826	0.250962	0.709075
ALDH6A1	-1.02929	0.0635029	1.04537
ALDH7A1	-0.930759	0.111699	1.02101
ALDH9A1	-0.591464	0.0356239	0.791889
ALDOA	-0.430421	-0.42082	0.922627
ALDOC	-1.35273	-0.153607	1.22733
ALG11	-0.153195	0.0982848	0.501477
ALG13	-0.259511	-0.190174	0.670585
ALG1	0.431848	0.147307	0.761022
ALG2	-0.598545	0.00432161	0.776445
ALG3	-0.486135	-0.115597	0.775714
ALG5	-0.327838	0.0949116	0.650192
ALG9	-0.297179	0.224658	0.722383
ALKBH1	-0.31317	-0.439285	0.867442
ALKBH4	-0.43677	0.0758749	0.715992
ALKBH5	-0.113062	-0.0839056	0.44381
ALKBH7	0.46095	-0.378007	0.915946
ALMS1	-0.110315	-0.0732415	0.428435
ALPL	-1.32825	-0.130523	1.2078
ALS2	0.256789	0.00863031	0.515188
ALYREF	-0.62025	-0.138442	0.871029
AMBP		-0.707218
AMD1	-0.281432	-0.617056	0.947886
AMDHD2	0.416982	0.03492	0.672236
AMER2	0.673721	1.54819	1.49061
AMFR	-0.772436	-0.0732415	0.919607
AMOTL2	-0.19979	-0.217591	0.64605
AMOT	-0.850256	-0.487015	1.1564
AMPD2	0.00865357	0.0786098	0.295404
AMPH	-0.495135	0.309758	0.897158
AMT	-1.18188	-0.373327	1.24708
ANAPC13	0.101874
ANAPC16	-0.287552	0.00647756	0.542245
ANAPC1	-0.304816	-0.175436	0.693002
ANAPC2	-1.00605	-0.213404	1.10429
ANAPC4	-0.18373	-0.12422	0.554933
ANAPC5	-0.456049	-0.0671829	0.723348
ANAPC7	-0.600826	-0.163268	0.874125
ANGEL2	-0.00489071	0.0214797	0.16239
ANGPTL2	-0.998958	0.0313952	1.01506
ANGPTL4	-0.103916	0.650765	0.868723
ANK2	0.717363	0.138159	0.924944
ANK3	1.82307	-0.0431999	1.36611
ANKFY1	0.236746	0.324235	0.748986
ANKHD1	-0.450243	-0.236164	0.828497
ANKIB1	0.321042	0.380175	0.837387
ANKLE2	-0.141693	-0.0649175	0.454544
ANKMY2	0.57779	0.168	0.863591
ANKRD11	-0.0299229	0.125651	0.394429
ANKRD13A	-0.021603	0.153805	0.418818
ANKRD13D	0.133541	0.611645	0.863241
ANKRD16	0.375044	-0.0641631	0.662727
ANKRD17	0.19117	0	0.43723
ANKRD1	0.542511	-0.681539	1.10637
ANKRD26	0.224859	0.16221	0.622149
ANKRD27	-0.127767	-0.148001	0.525137
ANKRD28	0.00214953	-0.0946491	0.311125
ANKRD39	0.134267	0.176323	0.557306
ANKRD40	-0.574547	-0.203402	0.882014
ANKRD45	0.298303	0.132906	0.656665
ANKRD46	0.780968	0.353888	1.0653
ANKRD50	0.817248	0.42707	1.11549
ANKRD52	0.0846705	-0.461959	0.739344
ANKRD54	0.105234	0.104337	0.457789
ANKS1A	0.810907	0.201634	1.00625
ANKZF1	0.284968	-0.208394	0.702398
ANLN	-1.52012	-0.507378	1.4239
ANO10	-0.213924	0.253384	0.6836
ANO1	-1.50401	-0.269686	1.3318
ANO6	-0.588584	0.187768	0.881108
ANO8	0.554693	0.621524	1.08454
ANP32A	-0.427224	0.0833836	0.714568
ANP32B	-0.949226	0.0391384	0.994165
ANP32E	-1.26457	0.0908534	1.16423
ANTXR1	-0.914035	0.194087	1.05267
ANTXR2	-0.301745	0.466758	0.876643
ANXA11	-0.53756	-0.449099	0.993307
ANXA1	0.133416	-0.373327	0.711859
ANXA2	-0.402576	-0.30668	0.842174
ANXA3	-0.654889	-0.530114	1.08858
ANXA4	-0.552735	0.181421	0.856829
ANXA5	-0.718946	-0.345564	1.03175
ANXA6	-0.790374	0.331132	1.05901
ANXA7	-0.58116	0.0600474	0.800754
AP1B1	0.401269	0.16543	0.752794
AP1G1	0.0634593	0.157044	0.469577
AP1G2	0.129155	-0.0402298	0.411564
AP1M1	0.214517	0.11836	0.576955
AP1S1	0.712801	0.178237	0.943948
AP1S2	-0.0850561	-0.107026	0.438272
AP2A1	0.463558	0.199751	0.814438
AP2A2	0.375084	0.325386	0.836941
AP2B1	0.66957	0.166715	0.914486
AP2M1	0.277314	0.292193	0.754657
AP2S1	-0.14078	0.228357	0.607567
AP3B1	-0.698236	-0.000721528	0.836037
AP3B2	0.558178	0.529071	1.04271
AP3D1	0.0525732	0.210389	0.512798
AP3M1	-0.246989	0.172488	0.64767
AP3M2	0.208596	0.202261	0.640981
AP3S1	0.0628659	0.0496308	0.335405
AP3S2		0.0621217
AP4E1	-0.669398	-0.0785637	0.864848
AP4S1	-0.0951561	0.0847446	0.424147
AP5M1	0.00730989	0.111031	0.344008
AP5S1	0.299895	0.183963	0.695599
AP5Z1	-0.138376	-0.141621	0.529148
APAF1	0.56108	0.153157	0.845126
APBA1	0.779125	0.451541	1.10935
APBA2	0.753874	0.267236	1.0105
APBA3	-0.169259	-0.257563	0.653316
APBB1	0.693238	0.317304	1.00526
APBB2	-0.736068	-0.0284105	0.874345
APC2	1.67135	0.675364	1.5319
APC	0.889433	0.187134	1.03758
APEH	-0.0864786	-0.0543923	0.375328
APEX1	-0.506751	0.209765	0.846473
APEX2	-0.687673	-0.39973	1.04279
API5	-0.158658	0.0820213	0.49059
APIP	0.140254	-0.151202	0.539867
APITD1	-0.890279	-0.903738	1.33941
APLP1	1.28673	1.17025	1.56748
APLP2	-0.439077	-0.469929	0.953418
APMAP	-0.00271255	0.198494	0.448561
APOA1	-0.505832	0.141433	0.804528
APOA2		-0.148801
APOBEC3C	-0.961623	-0.226004	1.08978
APOBEC3F	-0.338252	0.532566	0.933177
APOC1	-1.06849	0.513491	1.25777
APOE	0.523762	0.865919	1.17885
APOL2	-1.30119	0.261832	1.25021
APOM	0.333538	0.424385	0.870588
APOOL	-0.446886	-0.0499049	0.704834
APOO	-0.239978	-0.0724828	0.558982
APPBP2	0.193991	-0.0831412	0.526433
APPL1	0.0971154	0.112367	0.457692
APPL2	-0.191046	-0.0694519	0.51039
APP	0.246083	-0.253257	0.70664
APRT	-0.245916	-0.0218044	0.517417
APTX	-0.226572	-0.0671829	0.541992
AQR	-0.247019	0.169925	0.645712
ARAF	-0.800078	0.0820213	0.939202
ARAP1	-0.0642349	-0.0566412	0.347672
ARAP3	0.0286978	-0.397828	0.65309
ARCN1	0.0646382	-0.242977	0.55463
ARF1	0.0287063	0.596458	0.790673
ARF4	0.0817805	0.528571	0.78125
ARF5	0.703414	0.585924	1.13549
ARF6	-0.71945	0.197236	0.957437
ARFGAP1	0.425341	-0.0686952	0.702877
ARFGAP2	-0.0280077	-0.109359	0.37063
ARFGAP3	-0.324494	-0.122648	0.668687
ARFGEF1	0.277008	-0.0506518	0.572416
ARFGEF2	0.080261	0.213503	0.542
ARFIP1	-0.796103	-0.175436	0.985667
ARFIP2	0.0905033	-0.0566412	0.383594
ARFRP1	0.194227	0.0328061	0.47648
ARG2	0.970646	0.896853	1.36656
ARGLU1	-0.293639	-0.133685	0.6537
ARHGAP12	-0.215406	0.144046	0.599544
ARHGAP17	-1.02188	-0.00433459	1.01302
ARHGAP18	-0.514191	-0.37146	0.94109
ARHGAP19	-0.794704	0.908813	1.30519
ARHGAP1	0.186862	-0.019609	0.454391
ARHGAP21	0.225997	0.473527	0.836376
ARHGAP23	1.13502	0.827006	1.40072
ARHGAP26	-0.323478	-0.296899	0.78764
ARHGAP29	-0.145955	-0.869069	1.00748
ARHGAP32	0.649133	-0.0641631	0.844568
ARHGAP33	0.93326	0.702658	1.27903
ARHGAP35	0.0579218	0.329411	0.62236
ARHGAP39	-0.17066	0.238787	0.63988
ARHGAP42	-0.468661	-0.0908029	0.747973
ARHGAP5	-0.985636	-0.184425	1.08169
ARHGDIA	0.261916	-0.0357862	0.545621
ARHGDIB	0.860332	-0.0969617	0.978414
ARHGEF10	-1.13251	-0.382702	1.23094
ARHGEF11	0.705383	0.337426	1.02118
ARHGEF12	0.76783	0.446256	1.10186
ARHGEF16	-0.167554	0.209141	0.613755
ARHGEF17	-0.662626	0.0703893	0.856163
ARHGEF18	0.563537	0.144699	0.841567
ARHGEF1	0.089847	0.0942361	0.429049
ARHGEF26	-1.17499	-0.519735	1.30182
ARHGEF2	0.77028	0.529071	1.13989
ARHGEF40	-1.04521	-0.0101344	1.0273
ARHGEF6	-1.99225	-0.49716	1.57779
ARHGEF7	0.470906	-0.182786	0.808512
ARHGEF9	1.06021	0.537545	1.26402
ARID1A	-0.0738477	0.168642	0.492432
ARID1B	0.65404	0.157691	0.900961
ARID2	0.0128947	0.077243	0.300229
ARID3A	0.457156	-0.204233	0.813258
ARID3B	-0.206086	-0.0671829	0.522751
ARID4A	0.315075	-0.077041	0.626192
ARID4B	0.240632	0.198494	0.662666
ARIH1	0.35388	0.306846	0.81285
ARIH2	-0.0442237	0.106348	0.388036
ARL10	0.817776	0.254594	1.03555
ARL14EP	-0.251458	-0.108581	0.600032
ARL15	1.42701	0.451013	1.37041
ARL1	-0.0359271	0.35727	0.627055
ARL2BP	0.248365	0.183963	0.657516
ARL2	0.21379	0.152508	0.605225
ARL3	0.242657	0.321928	0.751389
ARL4C	0.0895795	-0.555333	0.803064
ARL5B	-0.585285	0.280956	0.930721
ARL6IP1	-0.601987	-0.248108	0.922006
ARL6IP4	-0.119581	-0.132104	0.501682
ARL6IP5	0.420266	0.275603	0.834188
ARL6	0.87476	0.591679	1.21097
ARL8A	0.687657	0.71721	1.18527
ARL8B	0.0556766	0.145351	0.448361
ARMC10	0.109016	0.163499	0.522029
ARMC1	-0.128428	0.0278618	0.395335
ARMC6	0.211979	-0.215915	0.654136
ARMC8	-0.211406	0.0813396	0.54106
ARMC9	-0.4748	-0.254978	0.854271
ARMCX1	0.347875	0.158337	0.711486
ARMCX2	-0.563827	-0.164076	0.853172
ARMCX3	0.218735	0.12499	0.586281
ARNT2	0.170439	0.00791308	0.422317
ARPC1A	0.203168	0.104337	0.554531
ARPC1B	-0.356516	-0.166503	0.723201
ARPC2	0.0873775	0.331132	0.646923
ARPC3	0.569332	0.0221902	0.769105
ARPC4	0.100787	0.366812	0.683812
ARPC5L	-0.0475961	-0.128945	0.420168
ARPC5	-0.0344505	0.145351	0.42403
ARPP19	-0.0147008	0.284514	0.547005
ARRB1	0.216296	0.741575	0.978709
ARRB2	0.050371	0.42707	0.690971
ARSA	0.155766	0.43776	0.770407
ARSB	-0.640357	0.0545012	0.833581
ARVCF	0.181325	0.465713	0.804387
ARX	0.794075	0.786178	1.25708
AS3MT		-0.232769
ASAH1	0.275031	0.582074	0.9258
ASAP1	-0.686833	0.182057	0.932143
ASAP2	0.314838	-0.0181473	0.577049
ASAP3	-0.50708	0.0854247	0.769743
ASB1	-0.0517402
ASB3	0.0576555	-0.0101344	0.260365
ASB6	0.102091	-0.550043	0.807548
ASCC1	-0.0755261	-0.0476664	0.350988
ASCC2	-0.263	0.168642	0.656995
ASCC3	-0.361939	-0.158429	0.721366
ASCL1	-0.791229	-0.205896	0.998562
ASF1A	-0.191158	0.0867838	0.527202
ASF1B	-2.12476	-0.688497	1.67728
ASH2L	-0.00710834	0.0328061	0.199786
ASL	-0.653546	0.0586628	0.843925
ASNA1	0.00193819	0.130931	0.364512
ASNSD1	-0.17168	0.214125	0.621132
ASNS	1.30867	-0.0671829	1.17297
ASPH	-0.65863	0.051024	0.84241
ASPSCR1	-1.05758	-0.0402298	1.04776
ASRGL1	-0.25812	0.169925	0.654252
ASS1	-1.01825	1	1.42065
ASTE1	-0.805238	0.106348	0.95477
ASUN	0.143217	-0.21927	0.602069
ATAD1	0.798128	0.138159	0.967619
ATAD2B	0.181899	0.486457	0.817531
ATAD2	-1.37609	-0.486004	1.36458
ATAD3A	-0.44688	-0.168123	0.784221
ATAD3B	-0.147559	-0.251539	0.631742
ATAT1	1.06104	0.861955	1.38672
ATCAY	1.69759	0.199123	1.37721
ATE1	-1.2702	0.28629	1.24759
ATF1	-0.539355	-0.309359	0.921257
ATF2	0.360371	-0.14003	0.70739
ATF6	0.0755242	-0.136062	0.459985
ATF7IP	0.181841	-0.077041	0.508805
ATG12	0.055427	-0.00361125	0.242978
ATG13	0.273738	-0.0380063	0.558341
ATG16L1	-0.0612615	-0.00940813	0.265838
ATG2A	-0.145242	-1.23447	1.17461
ATG2B	0.496568	0.428678	0.961897
ATG3	0.138567	-0.00940813	0.384676
ATG4A	0.397052	-0.326444	0.850585
ATG4B	-0.268266	0.182057	0.671061
ATG5	-0.155513	-0.0439433	0.446605
ATG7	-0.394129	0.11836	0.715883
ATG9A	0.602392	0.0179219	0.7876
ATIC	-0.742958	-0.210062	0.976228
ATL1	0.823984	0.325962	1.07236
ATL2	-0.56386	-0.0232698	0.766244
ATL3	-0.930201	0.16543	1.04672
ATM	-0.396111	0.171847	0.75363
ATN1	0.00932801	0.369606	0.615576
ATOX1	0.23515	0.196607	0.657083
ATP11A	-0.750209	0.283329	1.01663
ATP11C	0.00704945	0.0172093	0.155752
ATP13A1	-0.151638	0.0172093	0.410911
ATP13A3	-0.178683	-0.0387471	0.466294
ATP1A1	-0.0489806	-0.0357862	0.291147
ATP1A3	2.0427	1.53032	1.89024
ATP1B1	0.563797	0.401084	0.982284
ATP1B2	-0.298552	0.864335	1.07837
ATP1B3	-0.305226	0.0854247	0.62502
ATP2A2	0.089225	0.0969365	0.431464
ATP2B1	0.16438	-0.0521469	0.465325
ATP2B4	-0.672476	0.637378	1.14449
ATP2C1	0.463919	0.187768	0.807271
ATP5A1	0.0401736	0.154454	0.441166
ATP5B	0.193187	0.0607392	0.503911
ATP5C1	0.134486	0.181421	0.562056
ATP5D	0.383284	0.369606	0.867692
ATP5E	0.289651	-0.210897	0.707494
ATP5F1	0.0254085	-0.010861	0.190445
ATP5G1	-0.122158	0.166715	0.537469
ATP5H	-0.0626415	-0.109359	0.414729
ATP5I	0.0550346	-0.0992781	0.392827
ATP5J2	-0.281382	-0.100824	0.618228
ATP5J	0.165762	0.279768	0.667481
ATP5L	0.177535	-0.275786	0.673292
ATP5O	0.255276	-0.00723157	0.512355
ATP5SL	-0.125891	-0.0892673	0.463852
ATP5S	-0.288407	0.045443	0.577798
ATP6AP1	0.793087	0.291014	1.0412
ATP6AP2	0.0506623	0.302758	0.594491
ATP6V0A1	1.37206	0.427606	1.34152
ATP6V0A2	-0.360045	-0.111695	0.686834
ATP6V0D1	0.586783	0.291014	0.936908
ATP6V1A	0.660685	0.634593	1.1381
ATP6V1B2	0.732817	0.382391	1.05603
ATP6V1C1	0.532301	-0.010861	0.736995
ATP6V1D	0.265947	0.428678	0.833442
ATP6V1E1	0.745244	0.486457	1.10982
ATP6V1F	0.748855	0.131589	0.93832
ATP6V1G1	0.348584	0.283922	0.795302
ATP6V1G2	1.46812	0.701327	1.47291
ATP6V1H	0.550282	0.509949	1.02968
ATP7A	-0.166829	-0.0394883	0.454222
ATP9A	1.3849	1.09356	1.57431
ATPAF1	-0.378643	-0.319226	0.835385
ATPAF2	-0.355501	-0.390245	0.863566
ATPIF1	-0.126587	0.181421	0.554985
ATRIP	0.173478	-0.0785637	0.502037
ATRN	0.0449871	0.348799	0.627524
ATRX	0.55524	0.393416	0.97399
ATR	-1.04614	0.0908534	1.0663
ATXN10	0.403648	0.377401	0.88377
ATXN1L	-0.220468	0.0854247	0.553076
ATXN2L	-0.169669	-0.24554	0.644367
ATXN2	-0.0377873	0.0313952	0.263026
ATXN3	0.260036	0.141433	0.633616
ATXN7L3B	0.765142	0.185867	0.975197
AUH	0.0396986	0.156397	0.442826
AUP1	-0.474956	-0.0885002	0.750637
AURKA	-1.59279	-0.627048	1.48991
AURKB	-2.05753	-0.803393	1.69143
AUTS2	0.874679	0.855192	1.31525
AVEN	-0.877106	-0.355682	1.11031
AVL9	0.217755	0.0186342	0.486199
AXIN1	-0.348892	-0.407364	0.869629
AXL	-0.978585	-0.0588937	1.01857
AZI2	0.345742	0.347666	0.832711
B2M	-0.497451	0.60502	1.04999
B3GALT6	0.276762	-0.0439433	0.566308
B3GAT3	-0.250575	0.134878	0.620848
B4GALT4	-0.456485	-0.0985055	0.744977
B4GALT7	-0.693947	0.146003	0.916488
BABAM1	-0.211506	0.215368	0.653356
BACE1	0.176619	0.0989585	0.524954
BACH1	0.257966	0.0071955	0.514938
BACH2	1.29114	1.00324	1.51472
BAD	0.439881	-0.215077	0.809295
BAG1	-0.0670353	-0.0931094	0.400181
BAG2	-0.911692	-0.532199	1.20162
BAG3	-1.64699	-0.07552	1.31245
BAG4	-0.678577	-0.672313	1.16228
BAG5	-0.0911785	-0.0254707	0.341539
BAG6	0.424919	0.0690147	0.702804
BAHD1	0.127391	0.123004	0.500395
BAIAP2L1	-0.444789	-0.545824	0.995295
BAIAP2	0.137812	-0.328254	0.68269
BANF1	-0.676313	-0.498179	1.08374
BAP1	0.0148186	-0.0923402	0.327351
BASP1	1.39349	1.67852	1.75272
BAX	0.470174	0.0285692	0.706217
BAZ1A	-0.300929	-0.157625	0.677166
BAZ1B	-0.509165	0.0257376	0.731371
BAZ2A	0.29455	0.0861044	0.616972
BAZ2B	0.310046	0.334568	0.802879
BBS1	-0.164402	0.102322	0.516454
BBS2	-0.844207	0.35727	1.09612
BBS4	0.0923904	0.133564	0.475346
BBS9	0.0711928	0.495183	0.75258
BBX	-0.300793	-0.242977	0.737408
BCAM	-0.434067	0.236952	0.819157
BCAP29	-0.908286	0.0915306	0.999908
BCAP31	0.316114	-0.0724828	0.623376
BCAR1	-0.295529	-0.390245	0.828115
BCAR3	-1.47037	-0.024003	1.22244
BCAS2	0.25492	-0.0513992	0.553461
BCAS3	0.413556	0.478713	0.9446
BCAT1	-0.691878	-0.344648	1.0181
BCAT2	-0.667409	0.147958	0.902977
BCCIP	-0.382305	-0.290709	0.820374
BCHE	-0.437811	0.220949	0.81164
BCKDHA	-0.457371	0.0558898	0.716422
BCKDHB	-0.591789	-0.0596453	0.807115
BCKDK	0.229762	0.164143	0.627618
BCL10	0.579471	-0.441243	1.0103
BCL11A	1.64343	1.2461	1.69986
BCL11B	2.31095	0.969381	1.81117
BCL2L12	-1.37255	-0.762436	1.46116
BCL2L13	-0.426968	0.195977	0.789269
BCL2L1	0.732055	-0.046176	0.882174
BCL2L2	-1.23592	0.121679	1.16516
BCL7A	0.40235	0.463622	0.930577
BCL7C	-0.284787	-0.21927	0.70997
BCL9L	-0.162312	-0.0816138	0.493888
BCL9	0.315416	-0.00650678	0.567382
BCLAF1	0.136262	0.0955869	0.481507
BCORL1	-0.455182	-0.266212	0.849349
BCOR	0.365336	0.0299829	0.628744
BCR	1.08124	0.328262	1.18722
BCS1L	-0.807974	0.263635	1.03519
BDH2	-1.38998	0.131589	1.23352
BECN1	-0.0392047	0.173767	0.461489
BEND3	-0.267207	-0.360305	0.792157
BET1L	0.769467	-0.210897	0.990133
BET1	-0.692562	-0.0394883	0.8556
BEX1	0.710179	-0.0328314	0.861981
BICD1	0.381345	-0.160847	0.736336
BICD2	-0.518402	-0.237013	0.869146
BID	-0.579125	0.187768	0.875724
BIN1	0.477684	-0.164884	0.801604
BIN3	-0.354983	-1.03505	1.179
BIRC2	0.0142096	-0.335517	0.591377
BIRC5	-1.63133	-0.797112	1.55835
BIRC6	0.189971	0.0641931	0.504147
BLMH	0.770102	0.125651	0.946442
BLM	-1.23679	-0.50943	1.32145
BLOC1S1	-0.174023	-0.00288828	0.420608
BLOC1S2	0.612197	0.155102	0.875956
BLOC1S3	0.713909	0.08882	0.895951
BLOC1S5		-0.024003
BLOC1S6	-0.0598743	-0.0892673	0.386189
BLVRA	-0.507054	0.138159	0.803251
BLVRB	0.428904	0.261832	0.831105
BMP1	0.372096	0.271426	0.802198
BMP2K	0.759275	0.277985	1.01846
BMPR2	0.870625	0.386811	1.12135
BMS1	0.053836	-0.160847	0.463339
BNIP1	0.614345	0.0200577	0.796494
BNIP2	0.0218012	-0.192645	0.463083
BOD1L1	0.798267	0.14991	0.973743
BOD1	-0.384125	-0.211732	0.771918
BOLA1	0.146415	0.0593553	0.453619
BOP1	-0.0794145	-0.348317	0.654012
BPGM	0.319819	0.225892	0.738722
BPHL	0.26411	0.180784	0.667004
BPNT1	0.302602	0.303927	0.7788
BPTF	0.414941	0.0717627	0.697642
BRAP	-0.0862582	-0.163268	0.499526
BRAT1	-0.717421	-0.298673	1.00801
BRCA1	-1.90055	-0.631511	1.59125
BRCC3	0.0243262	-0.0551416	0.2819
BRD1	0.801006	-0.0793256	0.93826
BRD2	-0.245351	0.00791308	0.503254
BRD3	0.130279	0.27262	0.634744
BRD4	0.065379	0.195348	0.510614
BRD7	0.0122137	0.0593553	0.267524
BRD8	-0.387018	-0.266212	0.808226
BRD9	-0.0964879	-0.0174171	0.337498
BRE	-0.172994	0.312084	0.696475
BRF1	0.00342325	0.207893	0.459691
BRIP1	-1.37961	-0.641604	1.4217
BRIX1	-0.653465	-0.30668	0.97987
BRK1	0.45559	0.00647756	0.679755
BRMS1L	-0.409124	0.309176	0.847526
BRMS1	-0.0810599	0.0143553	0.308894
BROX	-0.329369	0.104337	0.658563
BRPF1	-0.0638737	-0.0892673	0.391332
BRSK1	1.31602	1.40463	1.64944
BRSK2	0.859243	1.14828	1.41687
BRWD3	0.403117	0.0854247	0.698958
BSCL2		0.546956
BSDC1	0.784358	0.319618	1.0507
BSG	-0.479643	0.178237	0.811098
BSN	1.26616	0.546462	1.34634
BTAF1	-0.17076	0.0915306	0.512143
BTBD10	0.717327	-0.0506518	0.876344
BTBD17	-0.330315	0.308011	0.798953
BTBD1	0.491038	0.00647756	0.705348
BTD	0.0422288	0.24732	0.538097
BTF3L4	0.75555	0.292193	1.02359
BTF3	-0.110441	-0.596187	0.840612
BTN2A1	0.59642	0.0942361	0.831057
BUB1B	-1.82343	-0.581001	1.55062
BUB1	-1.5318	-0.464942	1.41306
BUB3	-0.606826	-0.337339	0.971681
BUD13	-0.412445	-0.217591	0.793748
BUD31	-0.0498642	0.0738202	0.351688
BYSL	-0.905186	-0.242123	1.07113
BZW1	-0.222741	-0.0816138	0.551683
BZW2	0.769895	0.358396	1.06221
C10orf12	0.841749	0.128953	0.985242
C10orf76	-0.280678	0.268434	0.741021
C10orf88	0.237216	-0.117161	0.595296
C11orf54	-0.0408239	0.446786	0.69829
C11orf57	0.72058	-0.134477	0.924693
C11orf68	0.411505	-0.104697	0.718472
C11orf74	-0.135407	-0.0573917	0.439088
C11orf84	-0.145726	-0.138442	0.533074
C11orf96	1.63884	1.74996	1.84087
C12orf10	-0.043113	-0.167312	0.458722
C12orf29	-0.971375	-0.237013	1.09927
C12orf43	0.0942414	-0.33825	0.657641
C12orf45	-0.410465	0.051024	0.67933
C12orf4	-0.428386	0.219711	0.805045
C12orf57	0.139404	-0.138442	0.527111
C12orf73	0.774928	0.0962619	0.933375
C14orf119	-0.452835	-0.274041	0.85257
C14orf142	0.0361864	-0.070209	0.326183
C14orf159	0.107242	-0.0649175	0.414921
C14orf166	0.0498244	0.10165	0.389197
C15orf40	-0.68331	-0.0551416	0.859332
C15orf57	0.100298	0.112367	0.461156
C16orf13	-0.474623	0.0363275	0.714808
C16orf62	-0.315929	0.0531113	0.607487
C17orf75	-0.0215209	-0.173807	0.44196
C17orf80	0.0828195	-0.33825	0.648899
C18orf25	0.483704	0.00504062	0.699103
C18orf32	-0.197735	0.683921	0.938966
C18orf8	-0.018941	-0.0101344	0.170515
C19orf25	0.408918	-0.261881	0.819023
C19orf43	0.453086	-0.109359	0.749963
C19orf47	-0.174473	0.199751	0.611739
C19orf53	-0.182722	-0.59837	0.883794
C1QBP	-0.673754	-0.130523	0.896815
C1RL	0.49767	-0.247251	0.863088
C1orf109	-0.86963
C1orf122	0.0678632	-0.0551416	0.35072
C1orf123	-0.148247	-0.0101344	0.397972
C1orf174	-0.280237	-0.470929	0.866698
C1orf198	-0.671813	-0.22011	0.944417
C1orf21	-0.605215	0.136191	0.861049
C1orf43	0.199663	0.385155	0.764734
C1orf50	0.866445	0.218471	1.04159
C1orf52	0.280435	0.111031	0.625672
C20orf27	-0.446711	-0.25068	0.8351
C21orf33	-0.383357	0.0447438	0.654294
C21orf59	-0.0993408	-0.122648	0.471157
C2CD2L	0.00318774	0.592636	0.771896
C2CD2	-1.69529	-0.249822	1.39467
C2CD3	-0.412158	-0.492079	0.950914
C2CD4C	0.478518	0.107688	0.765641
C2CD5	-0.174585	0.325386	0.707087
C2orf47	-0.308878	-0.019609	0.573138
C2orf49	-0.217432	-0.334607	0.742993
C2orf69	-0.20757	-0.303116	0.714623
C2orf76	-0.0740511	-0.190174	0.514028
C3orf14	-0.082057	-0.172994	0.505026
C3orf38	-0.68181	-0.0985055	0.883355
C4orf46	-0.608993	-1.05589	1.2903
C4orf48	1.0042	0.283922	1.13495
C5orf22	-0.369105	-0.342817	0.843755
C5orf24	0.166834	0.0398403	0.454615
C5orf30	-0.948215	-0.400682	1.16142
C5orf51	-0.430956	-0.147202	0.760367
C6orf106	0.275581	-0.609332	0.940698
C6orf120	-0.871887	-0.104697	0.988223
C6orf203	0.291593	0.230203	0.722355
C7orf25	-0.878477	-0.0446872	0.960814
C7orf26	0.670958	-0.196773	0.931521
C7orf50	0.163318	-0.0961904	0.509419
C7orf55	-0.0303523	-0.0284105	0.24241
C8orf33	-0.238413	-0.247251	0.696896
C8orf59	-0.0874396	-1.03949	1.06157
C8orf82	-0.425445	0.0503276	0.689763
C9orf114	-0.766714	-0.223475	0.995082
C9orf142	-0.0195593	0.1137	0.365048
C9orf40	-0.710075	0.161565	0.933617
C9orf64	0.20002	0.160275	0.600245
C9orf72	0.223545	0.220949	0.666704
C9orf78	0.186498	-0.190174	0.613736
C9orf85	-0.316594	-0.00361125	0.565867
CA13	-0.382498	-0.0218044	0.635847
CA2	-1.63658	-0.450084	1.44453
CA3		-0.487015
CAAP1	-0.861225	-0.337339	1.09479
CAB39	0.453815	0.373509	0.909574
CABIN1	-0.315215	0.00216242	0.563363
CABLES2	0.159327	0.78576	0.972156
CACFD1	1.1165	0.213503	1.15326
CACHD1	-0.33255	0.182057	0.717361
CACNA2D1	0.538614	0.187768	0.85228
CACNA2D2	1.28181	1.07622	1.53559
CACNB3	1.44704	1.17441	1.61909
CACNG8	1.1168	1.67875	1.67199
CACTIN	-0.0550064	-0.170556	0.474934
CACUL1	-0.210221	-0.181149	0.625596
CACYBP	-0.402246	-0.364013	0.875362
CADM1	0.340247	0.230203	0.755281
CADM3	1.48224	1.38598	1.69358
CADM4	0.781639	0.292193	1.03626
CADPS	1.0334	0.901494	1.391
CAD	-0.918704	-0.190174	1.05303
CALB1	-0.219333	-1.01159	1.10947
CALB2	-0.549125	0.82171	1.17083
CALCOCO1	0.459222	0.0908534	0.741671
CALCOCO2	-0.937821	-0.115597	1.02636
CALD1	-0.627558	-0.0717244	0.836231
CALM1	-0.343216	0.513491	0.925585
CALR3		-0.0335695
CALR	-0.939942	0.0751903	1.00754
CALU	-0.946278	0.479231	1.19395
CAMK1D	-0.13701	0.404903	0.736148
CAMK1	-0.488245	-0.118727	0.779084
CAMK2A	1.77265	1.24914	1.73833
CAMK2D	0.115522	-0.14003	0.505522
CAMK2G	-0.0367732	0.703544	0.860417
CAMK4	-0.37497	0.149259	0.724037
CAMKK1	0.715893	0.391218	1.05219
CAMKK2	0.797621	0.334568	1.06404
CAMKMT	-0.306192	0.529071	0.913927
CAMKV	0.864453	1.19787	1.43608
CAMLG	0.619612	0.411426	1.0154
CAMSAP1	0.806877	0.257614	1.03174
CAMSAP2	0.645943	0.358396	1.00217
CAMSAP3	1.25953	0.430285	1.29993
CAND1	-0.448102	0.408168	0.925349
CAND2	0.0274801	0.270828	0.546176
CANT1	-0.099653	0.00360224	0.321334
CANX	-0.47677	0.107018	0.76406
CAP1	0.134641	-0.07552	0.458433
CAP2	-0.807247	-0.363085	1.08182
CAPG	-0.354224	-0.0808506	0.659602
CAPN1	0.616003	0.402176	1.00905
CAPN2	-0.692142	-0.0800879	0.878766
CAPN5	0.838274	0.526069	1.16805
CAPN7	-0.0998511	0.143393	0.493198
CAPNS1	0.149616	0.0200577	0.411914
CAPRIN1	0.239456	-0.132104	0.609557
CAPZA1	-0.0199106	0.00575927	0.160218
CAPZA2	0.0587112	0.0236102	0.286917
CAPZB	-0.222833	-0.0454314	0.517942
CARD10	-0.151036	-0.259288	0.640565
CARD8	-0.296576	2.59371	1.70008
CARHSP1	-0.22598	0.418999	0.803106
CARM1	-0.0603654	0.166715	0.47653
CARS2	0.094598	0.168	0.512443
CARS	0.609009	-0.0885002	0.83517
CASC3	-0.0274602	-0.139236	0.408284
CASC4	0.144438	-0.272297	0.645551
CASC5	0.776355	-0.578844	1.16413
CASKIN2	-0.583385	-0.0528949	0.797672
CASK	0.779546	0.521051	1.14044
CASP2	-0.360543	-0.503282	0.929422
CASP3	-0.484715	0.130931	0.784631
CASP6	-0.688725	0.0799754	0.876755
CASP7	-1.16365	-0.125006	1.13519
CAST	-0.623602	-0.578844	1.09656
CAT	-1.12815	-0.0343081	1.07817
CAV1	0.23859	-0.178698	0.645979
CBFB	-0.462282	-0.173807	0.797552
CBLB	0.761887	0.0221902	0.885481
CBLL1	0.539518	-0.521805	1.03021
CBL	0.155699	0.28155	0.661248
CBR1	0.159433	0.0840643	0.493455
CBR3	0.31794	0.0874628	0.636712
CBR4	-1.07362	-0.198427	1.12785
CBX1	0.393559	0.176323	0.754905
CBX2	-1.41016	-0.249822	1.2884
CBX3	0.0622988	-0.303116	0.604495
CBX4	0.69782	0.466236	1.07891
CBX5	-0.392679	-0.22095	0.783345
CBX6	-0.537942	0.0710762	0.780396
CBX8	-0.471858	0.311503	0.885077
CC2D1A	-0.00379229	0.128293	0.363436
CC2D1B	-0.292555	-0.314733	0.779286
CCAR1	-0.388518	-0.046176	0.659313
CCDC102A	-1.43771	-0.54372	1.40763
CCDC115	0.134245	-0.0656722	0.447121
CCDC117	-0.0405111	-0.432455	0.687725
CCDC120	1.06527	0.719403	1.33592
CCDC124	0.3043	-0.0394883	0.586335
CCDC12	-0.254874	-0.203402	0.676961
CCDC134	-0.631984	0.263034	0.946054
CCDC136	0.0433536	-0.445166	0.698942
CCDC137	-0.455342	-0.270556	0.851996
CCDC149	-0.284883	0.128953	0.643301
CCDC167	-0.167058	0.407081	0.757719
CCDC174	0.233907	-0.312939	0.739491
CCDC18	-0.592261	0.451013	1.02141
CCDC22	-0.411587	0.0398403	0.671883
CCDC25	-0.293189	-0.1976	0.700563
CCDC28A	-0.586663	0.255803	0.917859
CCDC28B	0.611165	0.289244	0.948899
CCDC43	-0.393861	-0.173807	0.753438
CCDC47	-0.821739	-0.164884	0.993289
CCDC50	0.108522	0.00504062	0.33699
CCDC51	0.0951351	0.0243197	0.345622
CCDC53	0.32291	0.126312	0.670241
CCDC58	-0.787459	-0.501239	1.13521
CCDC6	-0.353123	-0.0491584	0.634257
CCDC71L	1.06929	0.24123	1.14478
CCDC80	0.389826	-0.0611497	0.671547
CCDC84	-0.603897	-0.242123	0.919793
CCDC85B	-0.394535	-0.355682	0.866151
CCDC85C	-0.1325	-0.070209	0.450232
CCDC86	-0.689911	-0.740577	1.19603
CCDC88A	0.462931	0.591201	1.02671
CCDC88C	0.294956	0.219711	0.717403
CCDC8	-0.874363	-0.325539	1.0954
CCDC90B	0.431721	-0.0543923	0.697218
CCDC91	0.0538883	0.185867	0.489648
CCDC92	0.560294	0.524565	1.04157
CCDC93	0.191415	-0.0203404	0.460169
CCDC94	-0.0247396	-0.388355	0.642725
CCDC97	-0.271059	0.219711	0.700549
CCDC9	0.524342	-0.320126	0.918949
CCNA2	-1.88413	-0.9771	1.69152
CCNB1	-1.38603	-1.04841	1.56027
CCND1	-0.540295	-0.287184	0.909659
CCND2	-0.623799	-0.131313	0.868972
CCNDBP1	-0.497743	0.109695	0.779383
CCNH	0.0155621	0.0172093	0.181029
CCNK	-0.323647	0.24245	0.752394
CCNL1	-0.515146	-0.316528	0.911962
CCNL2	-0.280871	0.606442	0.941973
CCNT1	-0.383744	-0.086201	0.685526
CCNYL1	-0.221683	0.130931	0.593813
CCNY	-0.14071	0.485427	0.791288
CCP110	0.0699607	-0.0357862	0.325188
CCSER1	2.22191	1.23787	1.86005
CCSER2	0.630158	0.0874628	0.847125
CCS	-0.211366	0.169284	0.616968
CCT2	-0.122139	-0.12658	0.498718
CCT3	-0.248705	-0.046176	0.543029
CCT4	-0.2811	-0.176251	0.676277
CCT5	-0.379178	-0.232769	0.78227
CCT6A	-0.0250509	-0.261016	0.534852
CCT7	-0.0375552	-0.127368	0.406108
CCT8	-0.232394	-0.144808	0.614167
CCZ1		0.0758749
CD151	-0.180857	-0.0800879	0.510828
CD200	1.36966	0.695103	1.43693
CD274	-0.0614809	0.492622	0.744381
CD276	0.0981375	0.111031	0.45735
CD2AP	-0.674308	-0.157625	0.912103
CD2BP2	-0.0913186	0.0243197	0.340056
CD320	-0.179127	-0.25068	0.655597
CD3EAP	-1.05679	-0.443203	1.22474
CD44	0.694957	-0.0931094	0.887731
CD47	-0.631358	0.528571	1.077
CD59	0.118245	0.0765591	0.441366
CD63	-0.238058	-0.360305	0.773539
CD81	-0.471797	0.268434	0.860367
CD99L2	0.593519	0.857583	1.20462
CD9	-0.436995	0.594549	1.01565
CDAN1	-0.442708	0.0172093	0.678172
CDC123	-0.185992	-0.607133	0.890576
CDC16	-0.3463	-0.107803	0.673872
CDC20	-1.19381	-0.902389	1.44783
CDC23	-0.987772	-0.0181473	1.00296
CDC25C	-2.48151	-0.3893	1.69435
CDC26	0.0235278	-0.0596453	0.288397
CDC27	0.0182229	-0.147202	0.406725
CDC34	-0.55999	-0.0808506	0.800525
CDC37L1	0.5556	0.128293	0.826978
CDC37	-0.179591	-0.0328314	0.460893
CDC40	0.401125	-0.0992781	0.707391
CDC42BPA	0.193994	0.0703893	0.514183
CDC42BPB	0.38805	0.348232	0.858069
CDC42EP1	-0.905094	-0.156016	1.0301
CDC42EP2	-0.303724	0.0840643	0.622727
CDC42EP3	0.676936	0.0391384	0.846212
CDC42EP4	-0.316104	0.215368	0.729021
CDC42SE2	-0.0505455	0.231432	0.531016
CDC42	0.315435	0.0607392	0.613331
CDC5L	-0.0595219	-0.142417	0.449376
CDC73	-0.613344	-0.171368	0.88584
CDC7	-1.06117	-0.723801	1.33603
CDCA3	-1.77941	-0.325539	1.45085
CDCA5	-2.1679	-0.995678	1.77864
CDCA7L	-1.91773	-0.673463	1.60972
CDCA8	-1.67368	-0.928237	1.61305
CDH13	-0.197523	0.254594	0.672397
CDH23	0.644636	0.495695	1.06786
CDH2	-0.176982	0.0648829	0.491798
CDH4	-0.249048	0.510456	0.871495
CDH6	-0.652089	-0.304006	0.977801
CDIP1	0.0108933	-0.0152284	0.161622
CDK12	-0.505788	-0.107803	0.783321
CDK13	-0.408711	-0.0232698	0.657252
CDK14	0.417112	0.270828	0.829421
CDK16	0.228532	0.123004	0.592905
CDK17	0.620219	0.0697022	0.830615
CDK1	-1.87214	-0.304897	1.47548
CDK2AP1	-0.964286	-0.596187	1.24919
CDK2	-2.01043	-0.0908029	1.44956
CDK4	-0.878963	-0.027675	0.952175
CDK5RAP1	-0.306217	-0.336428	0.801651
CDK5RAP2	-0.746976	-0.575615	1.15004
CDK5RAP3	-0.497232	-0.112475	0.780837
CDK5	0.784783	0.636915	1.19235
CDK6	-0.931812	-0.506353	1.19924
CDK7	-0.188163	-0.352916	0.73558
CDK9	-0.818982	-0.251539	1.03466
CDKAL1	0.35273	-0.0969617	0.67059
CDKN1A	0.0954277	-0.41889	0.717159
CDKN1B	0.120239	1.24458	1.16826
CDKN1C	-0.892965	-0.520769	1.18901
CDKN2AIPNL	0.250625	-0.454032	0.839438
CDKN2AIP	-0.342841	-0.0566412	0.632046
CDKN2B	0.588865	-0.145605	0.857013
CDKN2D	1.45633	1.09761	1.5981
CDO1	-1.074	-0.586406	1.28857
CDR2L	-0.1168	0.0792928	0.442824
CDR2	-1.48639	-0.833927	1.52326
CDS2	0.162717	0.114367	0.526387
CDV3	-0.16363	-0.160847	0.569628
CDYL	-0.300223	-0.346481	0.804179
CEBPZ	-0.552257	-0.291592	0.918612
CECR2	-0.949771	0.28629	1.11178
CECR5	-0.160611	0.0426443	0.450838
CELF1	0.312629	-0.0985055	0.641198
CELF2	0.176725	-0.107026	0.532683
CELF3	1.61759	1.62504	1.80073
CELF4	2.07862	0.947105	1.73946
CELF5	2.16689	0.669027	1.68402
CELF6	2.33963	1.46963	1.95173
CELSR1	-1.76174	0.0172093	1.33377
CELSR2	0.155029	0.395611	0.742051
CEND1	1.02133	0.673104	1.30171
CENPB	0.255302	0.229588	0.69634
CENPE	-1.20995	-0.456999	1.29111
CENPF	-1.34763	-0.78339	1.4598
CENPH	-0.357217	-0.675765	1.01636
CENPI	-1.40066	-0.185245	1.25933
CENPJ	-1.0034	-0.281036	1.13333
CENPK	-1.60154	-0.64273	1.49809
CENPM	-1.20484	-0.21424	1.19125
CENPQ	-2.06449	-0.394032	1.56797
CENPV	-0.872515	0.219711	1.0451
CEP112	-0.999531	-0.266212	1.12505
CEP120	0.128212	-0.0671829	0.442035
CEP128	-1.16717	-0.325539	1.22176
CEP135	-0.762568	-0.0152284	0.881928
CEP152	-0.168533	0.0405418	0.457247
CEP170B	0.501017	0.0614306	0.749965
CEP170	1.14004	0.659925	1.34163
CEP192	-0.767052	-0.290709	1.02848
CEP250	0.133877	-0.024003	0.397341
CEP290	0.882766	-0.164884	1.02355
CEP350	0.21162	-0.348317	0.748289
CEP41	0.209858	0.0635029	0.522839
CEP44	-0.877531	-0.0762803	0.976633
CEP55	-1.38151	-0.341903	1.31279
CEP57	0.0518272	0.109026	0.401065
CEP63	0.310582
CEP72	-1.16629	-0.00361125	1.08162
CEP76	-0.303159	-0.0101344	0.559726
CEP78	-0.813719	-0.350155	1.07883
CEP85	-0.366682	-0.630394	0.998537
CEP89	0.412595	-0.466935	0.937832
CEP97	0.806062	0.312665	1.0577
CERCAM	-0.787055	0.220949	1.00399
CERK	0.146281	0.00288251	0.386216
CERS2	-0.557824	-0.0717244	0.793441
CERS5	0.326963	-0.392137	0.847998
CERS6	0.783615	0.951588	1.31727
CES1	-0.226371	-0.141621	0.606624
CETN2	-0.334799	-0.132894	0.683881
CETN3	0.264254	0.432425	0.834673
CFDP1	0.442111	0.515511	0.978581
CFL1	-0.0806606	0.0840643	0.405863
CFL2	-0.152266	-0.0800879	0.482031
CGGBP1	0.235521	-0.223475	0.677492
CGN	-0.308508	0.0942361	0.634621
CHAC2	-1.11893	-0.281036	1.1832
CHAF1A	-1.2562	-0.83779	1.44706
CHAF1B	-1.029	-0.72142	1.32304
CHAMP1	-0.232499	0.0271541	0.509562
CHCHD10	-0.415993	0.123666	0.734615
CHCHD2	0.0603881	-0.22011	0.529621
CHCHD3	-0.628372	-0.0320936	0.81269
CHCHD6	0.505165	0.380175	0.940925
CHD1L	-0.905529	-0.188529	1.04597
CHD1	-0.199105	-0.190997	0.624582
CHD2	0.225957	0.132906	0.599051
CHD3	1.79282	0.80653	1.61225
CHD4	0.10486	0.192825	0.545606
CHD7	-0.672774	-0.0694519	0.861526
CHD8	-0.00149004	0.0614306	0.25084
CHD9	0.608835	0.287472	0.946735
CHEK1	-1.28324	-0.688497	1.40419
CHEK2	-0.188582	-0.133685	0.567686
CHERP	0.117907	-0.172181	0.538598
CHIC2	-0.14488	-0.0816138	0.475913
CHID1	0.00796311	0.162855	0.413301
CHKA	0.148358	0.377957	0.725476
CHKB	-1.38435	-0.175436	1.24891
CHL1	2.87363	1.05832	1.98291
CHML	-1.1632	-0.136062	1.13985
CHMP1A	0.0563627	-0.00505829	0.247833
CHMP1B	0.32112	0.359521	0.82501
CHMP2A	0.237571	0.0710762	0.55556
CHMP2B	0.795217	0.511468	1.1431
CHMP3		-0.522841
CHMP4A	-0.05635	0.0724489	0.358886
CHMP4B	-0.134534	-0.00144342	0.368751
CHMP5	0.482439	0.106348	0.767325
CHMP6	0.0886045	-0.0284105	0.342074
CHMP7	0.438927	0.14991	0.767357
CHM	0.160024	0.194717	0.595602
CHN1	0.281311	0.27023	0.742658
CHN2	1.54277	1.26333	1.67514
CHORDC1	-1.28873	-0.28279	1.2536
CHP1	-0.423168	-0.0885002	0.71531
CHPF2	0.312709	0.353323	0.816108
CHPT1	-0.55731	0.0813396	0.799155
CHRAC1	-0.52231	-0.415037	0.968167
CHST14	-2.00043	-0.641604	1.62543
CHST3	-0.629465	-0.149601	0.882647
CHSY1	-0.235092	-0.155213	0.624743
CHTF18	-0.695178	-0.141621	0.914767
CHTF8	-0.272905	-1.01742	1.13592
CHTOP	-0.0324762	0.191563	0.473327
CHUK	0.624721	0.218471	0.918255
CHURC1	-0.132578	-0.284546	0.645852
CIAO1	-0.12409	-0.426625	0.742102
CIAPIN1	-0.0769493	-0.182786	0.509642
CIB1	-0.741179	-0.0762803	0.904135
CIC	0.0285223	-0.0686952	0.311797
CINP	-0.648601	-0.116379	0.874632
CIRBP	0.578225	0.187768	0.87521
CISD1	0.215843	0.299245	0.717696
CISD2	-0.036331	0.127633	0.404925
CIT	-0.961057	-0.186065	1.07104
CIZ1	-0.00474672	-0.170556	0.418692
CKAP2L	-2.14438	-0.624822	1.66409
CKAP2	-1.08011	-0.671164	1.32336
CKAP4	-0.199599	0.0996319	0.54702
CKAP5	-0.480952	0.199751	0.825047
CKB	-0.455654	0.768925	1.10661
CKMT1A		0.568032
CKS1B	-1.33304	-0.643856	1.40602
CKS2	-1.33012	-0.576691	1.38087
CLASP1	0.702933	0.37629	1.03886
CLASP2	1.55105	0.614003	1.47141
CLASRP	-0.710075	-0.0823773	0.890198
CLCC1	-0.342414	0.339137	0.825562
CLCN6	0.487325	0.823749	1.14502
CLCN7	-0.124735	0.262433	0.622229
CLDN6	0.134423	0.151209	0.534446
CLDND1	0.0909428	-0.293359	0.619921
CLEC16A	0.941283	0.307429	1.11746
CLGN	0.00138045	0.387363	0.623493
CLIC1	-0.668076	-0.490051	1.07616
CLIC4	0.199732	0.113034	0.559254
CLIC6	0.17004	0.503858	0.820913
CLINT1	-0.214631	0.0207689	0.48518
CLIP1	0.453725	-0.000721528	0.674126
CLIP2	1.02519	0.372952	1.18243
CLK1	0.303481	-0.186886	0.700262
CLK2	-0.466552	-0.372393	0.915939
CLK3	0.232691	-0.110916	0.58618
CLMN	-1.09606	-0.255839	1.16271
CLN5	-0.491456	0.421156	0.955307
CLN6	-0.909035	-0.536378	1.20225
CLNS1A	-0.529492	-0.281036	0.900293
CLP1	0.240963	-0.205064	0.667853
CLPB	0.637628	0.228357	0.930583
CLPP	0.47131	0.235727	0.840855
CLPTM1L	-0.219844	-0.135269	0.595913
CLPTM1	0.011552	0.1137	0.35391
CLPX	-0.879416	-0.107803	0.993589
CLSPN	-1.17912	-0.866436	1.43023
CLSTN1	0.320129	0.394514	0.845366
CLSTN3	1.52526	1.17919	1.64452
CLTA	-0.0292255	0.0229004	0.228311
CLTB	0.914361	0.324235	1.11292
CLTC	0.265316	0.306846	0.756413
CLUAP1	-0.44043	0.0271541	0.683801
CLUH	0.0823623	-0.15682	0.489063
CLU	-0.465653	0.201006	0.816492
CLYBL	-0.753906	0.206643	0.980076
CMAS	-0.0539677	0.377957	0.65721
CMBL	-0.55368	0.00144197	0.745065
CMC1	-0.625543	-0.395929	1.01068
CMC2	-0.315116	-0.283668	0.773811
CMIP	1.29436	0.824157	1.45551
CMPK1	0.111167	0.0335111	0.380366
CMSS1	-0.799325	-0.387412	1.08937
CMTM4	-0.872485	0.688852	1.24953
CNBP	-0.403361	0.0915306	0.703485
CNDP1		-0.321027
CNDP2	0.164678	-0.100051	0.514518
CNIH4	-0.291952	-0.380822	0.820228
CNKSR2	0.646079	0.0738202	0.848469
CNN1	1.15983	0.298072	1.20743
CNN2	0.281986	-0.290709	0.756767
CNN3	-0.869675	-0.461959	1.15396
CNNM3	-0.528257	0.25882	0.887174
CNNM4	0.337214	0.538041	0.935551
CNOT10	-0.178244	0.0100637	0.433945
CNOT1	-0.132171	0.0908534	0.472254
CNOT2	0.0167826	0.164143	0.425353
CNOT3	-0.30419	-0.00433459	0.55545
CNOT6L	0.335588	-0.270556	0.778552
CNOT6	-0.149662	-0.0203404	0.412314
CNOT7	-0.173388	-0.0915713	0.514742
CNOT8	0.588184	0.0321008	0.787581
CNPY2	-0.128771	0.0683269	0.443957
CNPY3	-0.442987	-0.239566	0.826168
CNPY4	0.164414	0.157691	0.567543
CNP	-0.466418	0.382944	0.921608
CNRIP1	-0.799126	0.26123	1.02974
CNTFR	0.0571423	0.746313	0.896357
CNTLN	-0.0701916	0.146003	0.464968
CNTN1	1.61388	1.52882	1.77277
CNTNAP2	0.466471	0.00934717	0.689795
COA1	-0.971487	-0.185245	1.07551
COA3	-0.240429	0.0363275	0.526077
COA4	-0.937942	-0.317427	1.12043
COA5	-0.0430662	0.0419438	0.291565
COA6	0.0392121	-0.236164	0.524762
COASY	-0.00142058	0.138159	0.373604
COG1	0.0106442	0.231432	0.492013
COG2	-0.311441	0.111699	0.650492
COG3	0.341909	0.222186	0.751063
COG4	-0.742201	-0.0101344	0.867373
COG5	-0.723915	0.0143553	0.859227
COG6	-0.157203	0.296311	0.673435
COG7	0.276888	0.246712	0.723602
COG8	-0.759064	0.238787	0.998925
COIL	-0.198867	-0.199255	0.630969
COL11A1	-0.390381	0.0342157	0.651611
COL18A1	-0.820256	0.606916	1.19464
COL1A1	0.480239	0.833092	1.14601
COL1A2	0.268064	0.710173	0.989058
COL2A1	-2.3987	-0.0762803	1.57321
COL4A1	0.350056	0.805705	1.07506
COL4A2	-0.201202	-0.104697	0.553082
COL4A3BP	0.453153	0.120352	0.757301
COL4A5	-1.80776	-0.0328314	1.35669
COL4A6	-1.27328	-0.374262	1.28357
COL5A1	-0.335021	-0.0137711	0.590586
COL5A2	-0.330071	0.374622	0.83946
COL6A1	-0.323925	0.362891	0.828744
COL6A2	-0.663956	0.561204	1.10687
COL8A1	-0.22171	0.0676387	0.537911
COMMD10	-0.809571	-0.0225369	0.912199
COMMD1	-0.137152	-0.111695	0.498846
COMMD2	-0.145779	-0.0357862	0.426105
COMMD3	0.440194	-0.274041	0.845124
COMMD4	-1.13026	0.0908534	1.10504
COMMD5	-0.181939	-0.0800879	0.511886
COMMD6	0.347227	-0.0446872	0.62603
COMMD7	0.359723	0.0321008	0.625959
COMMD8	-0.304584	-0.246395	0.74228
COMMD9	0.110562	0.0989585	0.457734
COMT	0.110442	0.267835	0.615043
COPA	0.213422	0.0461418	0.509474
COPB1	-0.116172	-0.12658	0.492699
COPB2	0.101357	-0.0793256	0.425068
COPE	0.330118	-0.264478	0.7711
COPG1	0.351638	-0.231922	0.763911
COPG2	-0.535953	0.145351	0.825411
COPRS	-0.470067
COPS2	0.239624	0.211635	0.671759
COPS3	-0.000883677	-0.125793	0.355917
COPS4	0.0387132	-0.0985055	0.37043
COPS5	-0.0716104	0.0419438	0.336978
COPS6	0.206291	0.045443	0.501731
COPS7A	-0.186771	-0.0664274	0.503188
COPS7B	0.112742	0.123004	0.485537
COPS8	-0.144363	-0.0513992	0.44245
COPZ1	-0.0484856	-0.246395	0.54303
COQ3	-0.376953	-0.691989	1.0339
COQ5	0.200665	-0.102372	0.550489
COQ7	0.775723	-0.16004	0.967349
COQ9	-0.980543	-0.116379	1.04734
CORO1A	1.80766	0.876959	1.63848
CORO1B	-0.145166	0.100305	0.49545
CORO1C	0.120833	0.507921	0.79294
CORO2A	0.494021	0.582556	1.03758
CORO2B	0.261159	-0.046921	0.55505
CORO7	1.20712	0.817214	1.42279
COTL1	0.27409	-0.152805	0.653372
COX16	-0.131937	0.0545012	0.431785
COX17	0.176348	0.232661	0.639538
COX18	-0.200748	0.0586628	0.509324
COX20	0.46442	-0.0854355	0.741522
COX4I1	0.462761	0.297485	0.871921
COX5A	0.114683	-0.0328314	0.384076
COX5B	0.158209	0.313246	0.686626
COX6A1	0.00452866	0.0221902	0.163459
COX6B1	0.182936	0.396159	0.760984
COX6C	0.307601	0.403813	0.843454
COX7A2L	0.371594	0.0391384	0.640884
COX7A2	0.740811	0.368489	1.05323
COX7C	0.348526	-0.0380063	0.621717
CPD	-0.430771	-0.0424568	0.687915
CPEB2	0.195341	0.0820213	0.526652
CPEB4	1.04804	0.397803	1.20243
CPE	0.366707	0.339708	0.840485
CPLX1	1.77841	1.7536	1.87937
CPLX2	1.84523	1.54325	1.84078
CPNE1	-0.480981	0.234501	0.845862
CPNE2	-0.253277	-0.0446872	0.545861
CPNE3	-0.21434	0.0765591	0.539351
CPNE4	-0.824797	-0.261881	1.04244
CPOX	-0.332602	-0.117161	0.670644
CPPED1	-0.711465	0.130272	0.917462
CPS1	-0.649506	0.112367	0.872853
CPSF1	-0.340782	0.0586628	0.632016
CPSF2	-0.376791	-0.132894	0.713923
CPSF3L	-0.091314	-0.000721528	0.303374
CPSF3	-0.483756	-0.195946	0.824441
CPSF4	-0.326801	-0.208394	0.731571
CPSF6	-0.38713	-0.0694519	0.675709
CPSF7	-0.509269	-0.132104	0.800858
CPT1A	-0.62097	0.385707	1.00333
CPT2	-0.120506	0.206018	0.571422
CPVL	-0.291702	0.621056	0.955383
CP		-0.185245
CRABP1	2.11884	1.9668	2.0213
CRABP2	-0.716181	0.812293	1.23631
CRADD	0.127427	0.0321008	0.399409
CRAT	-0.145975	0.299245	0.667248
CRB2	-1.01307	-0.31563	1.15269
CRBN	-0.382949	0.319618	0.838193
CREB1	-0.129723	0.297485	0.653611
CREBBP	0.109993	-0.132894	0.492836
CRELD1	0.154702	0.326537	0.693714
CRELD2	-0.207934	-0.21927	0.653609
CRH	-0.790684	-0.682696	1.21383
CRIM1	-0.541592	-0.318326	0.927318
CRIP1	0.228538	0.919912	1.07166
CRIP2	0.758777	0.764686	1.23429
CRIPT	-0.075333	0.224658	0.547714
CRISP3		-0.011588
CRISPLD1	-1.73187	-0.555333	1.51235
CRKL	0.251893	-0.0603973	0.55883
CRK	-0.743652	0.246712	0.995171
CRLF3	-1.10883	0.0214797	1.06316
CRMP1	1.2691	0.989502	1.50286
CRNKL1	-0.397341	0.306846	0.839158
CROCC	-0.592951	0.0861044	0.824048
CROT	-0.961659	-0.301337	1.12383
CRTAP	-0.454358	-0.171368	0.791029
CRTC1	0.399242	-0.210062	0.78058
CRTC2	-0.776012	-0.281912	1.02855
CRTC3	-0.266329	0.0915306	0.598214
CRYBG3		-0.013043
CRYL1	-0.776671	0.694657	1.21298
CRYZL1	0.205342	0.110363	0.561877
CRYZ	-1.70884	-0.129734	1.35594
CSDC2	1.37703	0.276794	1.28601
CSDE1	0.424214	-0.271426	0.83405
CSE1L	-0.605511	0.0565835	0.813692
CSF1	-1.40315	-0.137648	1.24129
CSK	0.455837	0.205393	0.81316
CSMD2	0.239612	-0.565972	0.897544
CSNK1A1	-0.655797	0.225275	0.938654
CSNK1D	-0.21608	-0.217591	0.658537
CSNK1E	0.493515	0.455229	0.974034
CSNK1G3	0.063979	0.233275	0.54521
CSNK2A1	0.0249327	0.27858	0.550919
CSNK2A2	-0.0729955	0.157044	0.479624
CSNK2B	-0.187438	-0.107026	0.542646
CSRP1	-0.271639	0.0786098	0.591818
CSRP2	-0.862878	-0.179515	1.02098
CST3	-0.436019	-0.201742	0.7986
CSTB	-0.298402	-0.711937	1.00516
CSTF1	-1.50237	-0.351074	1.36141
CSTF2T	-0.243413	-0.191821	0.659722
CSTF2	-0.126244	-0.149601	0.525209
CSTF3	-0.301468	-0.00288828	0.551685
CS	0.278781	0.22033	0.706478
CTAGE5	-0.7936	0.302758	1.04707
CTBP1	0.306892	0.215368	0.722675
CTBP2	0.117438	0.0193461	0.369844
CTBS	-0.56053	0.815985	1.17325
CTCF	0.145623	0.0949116	0.490443
CTDNEP1	0.503303	0.0306892	0.730748
CTDP1	0.428785	0.219711	0.805293
CTDSPL2	-0.301764	-0.462952	0.874481
CTGF	-0.137405	-0.585323	0.850134
CTH	-0.813503	0.120352	0.966362
CTIF	1.37041	0.614945	1.40903
CTNNA1	-0.61814	0.0236102	0.801093
CTNNA2	2.58138	1.38654	1.99196
CTNNAL1	-1.36351	-0.45107	1.34706
CTNNB1	-0.713784	0.0229004	0.858303
CTNNBIP1	0.244724	0.176323	0.648882
CTNNBL1	-0.277078	0.0306892	0.554767
CTNND1		0.201006
CTNND2	0.994505	0.912267	1.38086
CTPS1	-0.400318	-0.15441	0.744801
CTPS2	-0.99435	0.356144	1.16211
CTR9	-0.334919	0.0710762	0.637178
CTSA	-0.0573897	0.225892	0.532242
CTSB	0.106176	0.393416	0.706818
CTSC	0.0840952	-0.0717244	0.39474
CTSD	0.0186839	0.303927	0.567988
CTSH	0.116899	0.153805	0.520293
CTSZ	0.0353732	0.246712	0.531117
CTTNBP2NL	0.606685	0.175045	0.884155
CTTN	0.318098	0.220949	0.734198
CTU1	0.300816	-0.53952	0.916698
CTU2	-0.205964	-0.271426	0.690935
CUEDC1	-0.0164181	0.141433	0.397304
CUEDC2	0.0714862	-0.182786	0.504254
CUL1	-0.0663218	0.0278618	0.306893
CUL2	0.211874	0.166715	0.615296
CUL3	-0.487903	0.292193	0.88323
CUL4A	-0.0780407	-0.00650678	0.29077
CUL4B	0.102736	0.303342	0.637243
CUL5	0.0341641	0.228973	0.512968
CUL7	-0.242832	0.0391384	0.531008
CUTA	-0.0242624	-0.107803	0.363408
CUTC	-0.554998	-0.288065	0.918184
CUX1	0.151624	0.0313952	0.427807
CWC15	0.160828	0.222186	0.618882
CWC22	-0.42439	0.291014	0.845815
CWC27	-0.135302	-0.290709	0.652695
CWF19L1	-0.0284471	-0.213404	0.491783
CWF19L2	-0.34369	-0.257563	0.775405
CXADR	0.746129	0.790772	1.23972
CXCL14	-2.35382	0.62714	1.72655
CXXC1	0.171657	0.0703893	0.491982
CXXC5	-0.850461	-0.450084	1.14041
CXorf23	0.779033	0.459956	1.1131
CXorf38	-0.149871	0.120352	0.51983
CXorf56	0.206672	-0.172181	0.61551
CYB5A	-0.896688	0.264236	1.07746
CYB5B	-0.509918	-0.136062	0.803728
CYB5R1	0.366125	0.415759	0.884242
CYB5R3	0.213578	0.449957	0.814577
CYB5R4	0.68812	0.436695	1.06057
CYC1	-0.615102	-0.00868224	0.7898
CYCS	0.0950223	-0.0885002	0.428395
CYFIP1	-1.01552	0.0285692	1.02181
CYFIP2	0.647584	0.519542	1.08034
CYHR1	-0.0542325	0.187768	0.491935
CYLD	0.520314	0.141433	0.813478
CYP1B1	0.656222	0.155749	0.901094
CYP20A1	0.270568	0.329985	0.774954
CYP27A1	-0.214117	0.204767	0.647212
CYP2U1	0.277707	-0.378007	0.809761
CYP51A1	0.0590504	-0.268817	0.572597
CYR61	-2.31679	-0.591832	1.70547
CYTH1	0.419636	0.14991	0.754682
CYTH2	0.345323	0.14274	0.698615
D2HGDH	-1.12113	0.147307	1.12625
DAAM1	1.38108	0.367371	1.32229
DAB2IP	0.178897	0.1137	0.540923
DAB2	-0.888563	-0.419855	1.14386
DACT1	1.8746	0.716332	1.60964
DACT3	1.38602	1.44334	1.68207
DAG1	-0.388468	-0.0717244	0.678375
DAGLB	0.22987	0.0419438	0.521357
DALRD3	-0.194141	0.121015	0.561388
DAP3	0.313293	-0.0484122	0.601419
DAPK1	0.0780998	0.218471	0.544583
DAPK3	-0.454596	-0.0424568	0.70502
DAP	-0.768256	-0.144808	0.955544
DARS2	-1.03097	-0.0174171	1.02391
DARS	-0.975551	-0.117944	1.0457
DAXX	-0.652548	-0.370527	1.01147
DAZAP1	0.261346	0.0854247	0.588873
DAZAP2	-0.0827718	-0.133685	0.46525
DBI	-0.719729	-0.530114	1.11796
DBN1	0.329845	0.370722	0.836999
DBNDD1	0.94136	0.364572	1.14277
DBNL	-0.114949	0.24732	0.601888
DBR1	-0.579825	0.115699	0.833981
DBT	0.643063	0.130931	0.879769
DCAF10	0.316463	0.0475384	0.603325
DCAF11	0.362205	-0.15441	0.718759
DCAF13	-0.880432	-0.370527	1.11846
DCAF15	-0.27851	0.0250288	0.550944
DCAF16	-0.342543	-0.205064	0.740005
DCAF5	0.549722	0.311503	0.928022
DCAF7	0.136043	0.219711	0.596451
DCAF8	-0.0237678	-0.010861	0.186088
DCAKD	-0.107591	0.169284	0.526189
DCBLD2	-0.16838	0.192194	0.600478
DCC	1.98874	1.6227	1.90038
DCD	0.103878	0.641084	0.863111
DCHS1	0.567843	0.531069	1.04829
DCK	0.498591	-0.136062	0.796651
DCLK1	1.04737	1.03598	1.44338
DCLK2	0.908317	1.33113	1.49648
DCP1A	-0.00815517	-0.0823773	0.300886
DCP1B	-0.325841	-0.210062	0.732054
DCP2	-1.09059	-0.328254	1.19115
DCPS	-0.568659	-0.0908029	0.812072
DCTD	-0.692839	-0.354759	1.02352
DCTN1	0.543471	0.403813	0.973285
DCTN2	0.461359	0.333424	0.891506
DCTN3	0.558667	0.324811	0.939935
DCTN4	0.470806	0.27262	0.862222
DCTN5	-0.171927	0.0356239	0.455578
DCTN6	0.574499	0.247928	0.906877
DCTPP1	-0.774279	-0.283668	1.02857
DCUN1D1	-0.224498	0.0840643	0.555484
DCUN1D5	-0.222804	0.158337	0.617366
DCXR	-0.420565	0.350497	0.878102
DCX	1.67858	1.97085	1.91035
DDA1	0.737458	-0.0357862	0.879343
DDAH1	-1.03847	0.226509	1.12471
DDAH2	0.604515	0.845189	1.20404
DDB1	0.166411	0.140779	0.554247
DDB2	-0.130849	-0.211732	0.585304
DDHD1	0.992618	0.057277	1.02464
DDHD2	0.413083	0.227741	0.800515
DDOST	0.463077	0.0313952	0.703188
DDR1	-0.161425	-0.0203404	0.426339
DDRGK1	0.199045	0.139469	0.58182
DDT	0.432099	-0.558517	0.995297
DDX10	-0.267921	-0.406407	0.821175
DDX17	-0.0468096	-0.0262051	0.270212
DDX18	0.0255296	-0.456999	0.694643
DDX19A	-0.420511	-0.0785637	0.706452
DDX19B	0.0371179	0.235114	0.521759
DDX1	-0.405601	-0.117944	0.723564
DDX20	-0.335237	-0.422752	0.870626
DDX21	-0.48915	-0.346481	0.914129
DDX23	-0.498619	-0.0686952	0.753203
DDX24	0.435502	-0.113255	0.740781
DDX27	-0.556082	-0.511485	1.03323
DDX28	-0.45263	-0.16004	0.782733
DDX39A	-0.304949	0.0600474	0.604149
DDX3X	-0.321104	-0.156016	0.690738
DDX41	-0.554767	-0.235314	0.888865
DDX42	-0.123455	-0.21927	0.585427
DDX46	-0.295102	-0.19347	0.698979
DDX47	-0.28114	-0.0528949	0.577957
DDX50	-0.302816	-0.292475	0.771551
DDX51	-0.300082	-0.275786	0.75886
DDX52	-0.785157	-0.255839	1.02029
DDX54	-0.867239	-0.72738	1.26278
DDX55	-0.633405	-0.296899	0.964523
DDX56	-0.381285	-0.494109	0.935625
DDX58	-0.749342	0.36793	1.05701
DDX59	0.712896	-0.72977	1.20111
DDX5	0.313854	-0.188529	0.70879
DDX6	0.979162	0.0306892	1.00491
DECR1	-0.977998	0.0593553	1.01851
DECR2	0.551747	-0.202572	0.868515
DEGS1	-0.4457	-0.181968	0.792255
DEK	-0.902138	-0.116379	1.00922
DENND1A	0.411619	-0.104697	0.718551
DENND1C		0.0881416
DENND2A	0.269774	0.0150693	0.533707
DENND4A	-0.5018	0.244278	0.863758
DENND4B	0.129477	0.123004	0.502475
DENND4C	-0.68242	-0.0394883	0.849652
DENND5A	-0.330734	0.247928	0.760698
DENND5B	0.210627	0.12499	0.579324
DENND6A	-0.492151	0.193456	0.828014
DENR	-0.0307748	0.148609	0.423537
DEPDC1B	-1.18763	-0.520769	1.30706
DERA	-1.98069	0.0593553	1.4283
DESI1	0.623115	-0.077041	0.836753
DESI2	-0.443574	-0.16004	0.776926
DES		-0.538471
DET1	-0.0910928	-0.011588	0.320438
DFFA	-1.22229	-0.107803	1.1533
DFNA5	0.00464143	0.305095	0.55654
DGCR14	0.579135	-0.401635	0.990338
DGCR8	-0.125617	-0.176251	0.549425
DGKA	-0.0253143	0.328836	0.595106
DGKD	0.285121	0.168642	0.67362
DGKE	0.753419	0.377957	1.06366
DGKH	0.56108	0.0214797	0.763256
DGKQ	0.377749	0.194087	0.756198
DGKZ	-0.0862875	0.49211	0.760524
DGUOK	-0.0275585	0.182057	0.457837
DHCR24	-0.0634886	0.0690147	0.36401
DHCR7	-0.30812	-0.0908029	0.631603
DHDDS	0.00389042	0.329411	0.577322
DHFR	-1.17678	-0.90644	1.44334
DHODH	-0.408502	-0.00795672	0.645336
DHPS	0.68957	-0.268817	0.978973
DHRS11	-0.29828	-0.232769	0.728731
DHRS13	0.601359	0.336283	0.968319
DHRS1	-0.566134	0.29337	0.927095
DHRS4	-0.767842	-0.436354	1.09736
DHRS7B	0.514076	0.285106	0.89397
DHRS7	0.0495524	0.496207	0.738755
DHTKD1	-0.446952	-0.011588	0.677156
DHX15	-0.387111	0.151859	0.734145
DHX16	0.224391	-0.000721528	0.47446
DHX29	0.114325	-0.114816	0.478687
DHX30	0.173228	0.00288251	0.419655
DHX32	-0.38709	-0.120294	0.712309
DHX34	-0.552581	-0.230228	0.884765
DHX35	0.144774	-0.086201	0.480598
DHX36	0.602343	0.0786098	0.825199
DHX37	-0.759569	-0.122648	0.939264
DHX38	-0.00657687	0.0179219	0.156521
DHX40	-0.640666	-0.232769	0.934577
DHX57	-0.284042	0.0955869	0.61614
DHX8	0.0228898	-0.0218044	0.21141
DHX9	-0.0133829	0.197236	0.458933
DIABLO	-0.205885	-0.00288828	0.456918
DIAPH1	-0.116725	-0.152003	0.51839
DIAPH2	-1.45848	0.0901759	1.24445
DIAPH3	-0.662544	-0.358454	1.01044
DICER1	0.203179	0.0820213	0.534041
DIDO1	-0.0533583	0.131589	0.430056
DIMT1	-0.815441	-0.462952	1.13066
DIP2A	-0.0311775	0.392317	0.650765
DIP2B	0.803508	0.469886	1.12845
DIP2C	0.99241	0.788686	1.33458
DIRAS1	1.22408	0.372395	1.26352
DIS3L2	0.383832	0.283922	0.817162
DIS3	0.649024	0.102994	0.86719
DIXDC1	-0.0777059	0.192825	0.520126
DKC1	-0.867157	-0.0747601	0.970524
DLAT	-0.502737	-0.22095	0.850698
DLD	0.0428684	0.0861044	0.359128
DLG1	-0.529319	-0.158429	0.829306
DLG2	1.52629	0.746313	1.50752
DLG3	-0.42815	0.08882	0.719006
DLG5	-0.213586	-0.0387471	0.502328
DLGAP4	0.921483	0.718088	1.28046
DLGAP5	-2.03948	-0.565972	1.61414
DLK1	-1.65636	-0.739372	1.54781
DLL3	-0.364871	0.176323	0.735659
DLST	0.666746	-0.107803	0.880085
DLX1	0.588455	0.574828	1.07856
DLX5	0.833183	0.652601	1.21893
DMAP1	-0.23028	0.0531113	0.532345
DMD	-0.333713	-0.224317	0.747014
DMWD	0.132248	0.331705	0.681141
DMXL1	0.185171	0.213503	0.631406
DMXL2	0.0229002	0.463099	0.697137
DNA2	-0.234469	-0.0839056	0.564247
DNAAF2	0.0693089	-0.382702	0.672317
DNAH7	0.431713	-0.913216	1.15971
DNAJA1	-0.30735	-0.283668	0.768777
DNAJA2	0.0751776	-0.215077	0.538753
DNAJA3	-0.16367	-0.103147	0.516543
DNAJA4	-0.363955	-0.0839056	0.669224
DNAJB11	-0.0173625	0.134878	0.39018
DNAJB12	0.202108	-0.467932	0.81856
DNAJB14	0.511476	-0.0210722	0.729759
DNAJB1	0.0346626	-0.45502	0.699773
DNAJB2	0.528952	0.256407	0.886205
DNAJB4	-0.0698168	-0.239566	0.556222
DNAJB5	0.717146	0.623399	1.15782
DNAJB6	0.10974	0.0915306	0.448632
DNAJB9	0.0166434	-0.164884	0.426061
DNAJC10	-0.485831	0.0257376	0.71524
DNAJC11	-0.2683	-0.00795672	0.525601
DNAJC13	0.49108	0.0243197	0.717913
DNAJC14	0.37275	0.271426	0.802606
DNAJC16	0.355755	-0.118727	0.688826
DNAJC17	0.554062	0.132248	0.828438
DNAJC18	0.777907	0.0962619	0.93497
DNAJC19	-0.198806	0.0342157	0.482723
DNAJC1	-0.707224	-0.335517	1.02115
DNAJC21	-0.0122468	-0.319226	0.575736
DNAJC24	-0.286128	0.208517	0.70331
DNAJC2	1.1517	-0.289827	1.20064
DNAJC3	-0.274428	-0.257563	0.729377
DNAJC5	0.645637	0.740712	1.17743
DNAJC6	2.02043	0.455229	1.57342
DNAJC7	0.528616	-0.484994	1.00678
DNAJC8	-0.114583	-0.182786	0.545316
DNAJC9	-0.565638	-0.464942	1.01517
DNAL1	-0.139705	0.0799754	0.468701
DNAL4	0.639529	0.411426	1.02516
DNASE2	-0.228646	0.58111	0.899864
DNER	1.01368	1.41684	1.55901
DNM1L	-0.00863246	0.0751903	0.289522
DNM1	1.02107	0.533563	1.24685
DNM2	0.00427259	-0.0210722	0.159201
DNM3	2.1248	0.366252	1.57831
DNMBP	-1.74084	-0.617056	1.53555
DNMT1	-0.834764	-0.16246	0.998611
DNMT3A	0.0632686	0.377957	0.664248
DNMT3B	-0.65386	0.556797	1.1003
DNPEP	0.435052	-0.00288828	0.66177
DNPH1	-0.784374	0	0.885649
DNTTIP1	-0.140817	-0.392137	0.730037
DNTTIP2	-0.167241	-0.464942	0.795099
DOCK11	0.183439	0.36233	0.738761
DOCK1	-1.81791	0.08882	1.38084
DOCK3	0.604814	0.632734	1.11245
DOCK6	-0.501928	0.557288	1.02918
DOCK7	0.149368	0.331132	0.693181
DOHH	0.639574	-0.0144996	0.808748
DOK1	-1.70969	0.0955869	1.34361
DONSON	-1.42759	-0.0573917	1.2186
DOPEY1	-0.206383	0.427606	0.796234
DOPEY2	1.08956	0.695994	1.33624
DOT1L	-0.132015	-0.0218044	0.392199
DPCD	-0.495471	-0.45799	0.976453
DPF1	0.773223	0.443607	1.1031
DPF2	0.216281	0.0143553	0.480246
DPF3		0.252779
DPH1		-0.553214
DPH5	-0.721826	-0.352916	1.0367
DPM1	0.0173177	0.176323	0.440046
DPM3	-0.529444	0.168	0.835131
DPP3	0.0983899	0.228973	0.572156
DPP6	-0.0717101	0.472488	0.737698
DPP9	0.0318791	-0.00868224	0.201399
DPPA4	-2.11906	-0.462952	1.60687
DPY30	-0.279761	-0.205896	0.696891
DPYD	0.0138196	-0.12422	0.371537
DPYSL2	0.597492	0.496718	1.04604
DPYSL3	1.04571	0.725523	1.33088
DPYSL4	0.24658	0.51248	0.871241
DPYSL5	0.71138	0.505891	1.1033
DPYS		0.714575
DR1	-0.10632	0.0321008	0.372049
DRAP1	-0.0788317	0.155749	0.484336
DRAXIN	0.449434	0.82171	1.12745
DRG1	-0.161753	-0.24127	0.634841
DRG2	-0.45749	0.501312	0.979184
DROSHA	-0.000650962	-0.0596453	0.245553
DSCC1	-2.02605	-0.639355	1.63261
DSCR3	0.41269	0.134878	0.739978
DSG2	-0.423176	-0.0823773	0.711023
DSN1	-2.21005	-0.261881	1.57224
DSP	-0.386727	-0.565972	0.976063
DSTN	0.000851063	-0.351074	0.593233
DST	0.334261	0.251568	0.765394
DTD1	0.549582	0.238175	0.887557
DTL	-2.59406	-1.18279	1.94341
DTNA	0.037477	-0.110916	0.385218
DTNBP1	-0.0297142	-0.132894	0.403247
DTWD1	-0.783806	0.24245	1.01304
DTWD2	0.131845	-0.320126	0.672288
DTX3	0.354968	0.251568	0.778804
DTYMK	-1.52209	-0.331881	1.36161
DUS1L	0.175834	-0.268817	0.666822
DUS3L	-0.30958	-0.155213	0.681757
DUSP11	-0.139151	-0.317427	0.675705
DUSP12	0.191291	-0.206728	0.630888
DUSP16	0.0936046	-0.456009	0.74136
DUSP22	-0.0179922	0.384602	0.634503
DUSP23	-0.886158	-0.563838	1.20416
DUSP3	0.0383335	0.0731347	0.333868
DUT	-1.19588	-0.649503	1.35845
DVL1	0.329019	0.684819	1.00689
DVL2	-0.632864	-0.0372659	0.818615
DVL3	-0.225074	0.159629	0.620245
DYM	-0.388206	0.345964	0.856837
DYNC1H1	0.783578	0.486972	1.12719
DYNC1I2	0.416179	0.279174	0.833878
DYNC1LI1	0.457671	0.175045	0.795435
DYNC1LI2	0.0864969	0.370164	0.675767
DYNC2H1	-0.0687408	0.107688	0.420034
DYNC2LI1	-0.812788	0.142087	0.977177
DYNLL1	0.0379368	-0.110137	0.384804
DYNLL2	-0.396421	0.238787	0.797
DYNLRB1	0.37654	0.0717627	0.669554
DYNLT1	0.565823	-0.0656722	0.794667
DYNLT3	0.150434	-0.0137711	0.405222
DYRK1A	0.277434	0.292782	0.755126
DZIP3	-0.101295	0.0565835	0.397339
E2F3	-0.794758	-0.131313	0.962326
E2F4	-0.0218283	-0.0816138	0.321624
E2F5	-0.748571	-0.744197	1.22179
E2F6	-0.428284	-0.0885002	0.718877
EAF1	0.395907	0.138159	0.730799
EAPP	0.638392	0.299245	0.968316
EARS2	-0.163125	0.0200577	0.427998
EBNA1BP2	-0.3814	-0.49716	0.937315
ECD	-0.0577412	-0.262746	0.566116
ECE1	0.239349	0.0419438	0.53037
ECH1	0.069851	-0.0262051	0.309929
ECHDC1	-0.359675	-0.296013	0.809746
ECHS1	-0.20724	-0.0291463	0.486196
ECI1	-1.3282	0.270828	1.26453
ECI2	-1.08117	-0.336428	1.19063
ECSIT	0.0195365	0.0384362	0.240775
ECT2	-1.31689	-0.45502	1.33113
EDC3	-0.353273	-0.254117	0.779353
EDC4	-0.0304495	-0.0513992	0.286092
EDEM3	-0.0856097	0.214747	0.548048
EDF1	-0.121499	-0.00361125	0.353709
EEA1	0.406301	-0.292475	0.835928
EED	-0.509479	-0.205064	0.845307
EEF1A1	0.146631	-0.475936	0.789029
EEF1A2	1.02429	0.857185	1.37167
EEF1B2	-0.53942	-0.450084	0.994738
EEF1D	-0.523898	-0.234465	0.870841
EEF1E1	-0.504471	0.0468403	0.742504
EEF1G	0.31163	-0.416	0.853012
EEF2K	-0.191353	-0.192645	0.619676
EEF2	0.543435	-0.231922	0.880543
EEFSEC	-0.521983	0.137504	0.812088
EEPD1	-2.77657	-0.202572	1.72602
EFCAB7	0.339749	-0.0581425	0.630786
EFHD2	-1.00239	-0.158429	1.07741
EFNB1	-0.469826	0.1137	0.763889
EFNB2	0.0516213	-0.168123	0.468769
EFNB3	1.19183	0.614003	1.34381
EFR3A	0.423927	-0.383642	0.898649
EFS	-0.45517	0.205393	0.81275
EFTUD2	-0.421141	-0.107026	0.726751
EGFR	-0.0122442	-0.12422	0.369411
EGLN1	0.0411312	0.0377336	0.280829
EHBP1L1		0.522558
EHBP1	0.37363	0.247928	0.788389
EHD1	-0.271576	0.0786098	0.591765
EHD2	0.43961	0.298072	0.858884
EHD3	0.739658	0.768502	1.22807
EHD4	-0.940308	-0.512514	1.20533
EHMT1	-0.536583	-0.0671829	0.777024
EHMT2	-0.244953	-0.138442	0.619188
EI24	-0.0629282	0.187768	0.500695
EIF1AD	-0.14824	-0.0885002	0.486559
EIF1AX	-0.0984151	-0.144808	0.493176
EIF1B	0.654584	0.147307	0.895484
EIF1	0.537199	-0.844251	1.17535
EIF2AK1	-0.509334	-0.0558912	0.751815
EIF2AK2	-0.791848	-0.190174	0.99097
EIF2AK4	0.11113	-0.161653	0.522286
EIF2A	-0.161285	-0.283668	0.667048
EIF2B1	-0.203018	0.0143553	0.466233
EIF2B2	-0.517468	-0.0954196	0.782871
EIF2B3	0.71377	-0.046921	0.872176
EIF2B4	-0.575903	-0.0137711	0.767903
EIF2B5	-0.343047	0.107018	0.670869
EIF2D	-0.896611	-0.510457	1.1862
EIF2S1	-0.564766	0.0114956	0.759119
EIF2S2	-0.27572	-0.0626556	0.581701
EIF2S3	0.0713156	-0.108581	0.424142
EIF3A	-0.0104733	-0.110916	0.34841
EIF3B	-0.384667	-0.15441	0.734218
EIF3D	-0.306798	-0.139236	0.667857
EIF3E	-0.14038	-0.328254	0.684568
EIF3F	-0.216892	-0.287184	0.709983
EIF3G	-0.00297303	-0.331881	0.578666
EIF3H	0.137235	-0.403542	0.735375
EIF3I	-0.0736473	-0.368663	0.665064
EIF3J	-0.19045	-0.304897	0.703809
EIF3K	0.0637245	-0.157625	0.470477
EIF3L	0.324192	-0.167312	0.701074
EIF3M	-0.443681	-0.00216567	0.667717
EIF4A1		-0.0671829
EIF4A2	0.471198	0.65581	1.06161
EIF4A3	-0.658343	0.0440443	0.838085
EIF4B	0.100236	-0.319226	0.647658
EIF4E2	-0.531681	0.145351	0.82282
EIF4E3	-0.231506	-0.422752	0.808862
EIF4EBP1	-0.112878	0.0655723	0.422433
EIF4EBP2	-0.157715	0.0738202	0.481181
EIF4ENIF1	-0.0771332	-0.184425	0.511427
EIF4E	-0.0443665	0.0949116	0.3732
EIF4G1	-0.610052	-0.288065	0.94769
EIF4G2	0.450372	-0.00505829	0.674856
EIF4G3	-0.0701474	0.232661	0.55028
EIF4H	-0.376163	-0.19512	0.755833
EIF5A2	0.119104	-0.243831	0.602441
EIF5A	-0.087084	-0.260152	0.589267
EIF5B	0.0569396	-0.117944	0.418191
EIF5	0.255484	0.0398403	0.543437
EIF6	-0.0731666	-0.165693	0.488733
ELAC1	-0.27946	0.104337	0.619514
ELAC2	-0.367309	-0.416962	0.885591
ELAVL1	-0.680166	0.0129262	0.832522
ELAVL2	0.919587	0.295135	1.10214
ELAVL3	1.42795	1.34255	1.66448
ELAVL4	1.95059	1.38957	1.82761
ELFN1	-0.0131552	0.398898	0.641913
ELL	-0.0234852	-0.145605	0.411206
ELMO1	0.7817	-0.105473	0.941899
ELMO2	0.23004	0.275603	0.711086
ELMOD2	-0.148241	0.160275	0.555442
ELOF1	0.209883	-0.0262051	0.485889
ELOVL1	-0.388489	-0.0581425	0.668305
ELOVL5	-0.826812	-0.305788	1.06424
ELP2	-0.797582	0.0391384	0.914724
ELP3	0.233672	0.16092	0.628165
ELP4	-0.576425	0.0806577	0.810606
ELP5	-0.663166	0.386811	1.02468
EMC1	-0.23373	0.0901759	0.569127
EMC2	-0.156897	-0.046921	0.451463
EMC3	0.275071	0.0662614	0.584237
EMC4	0.0642276	0.200379	0.514399
EMC7	0.126988	-0.0343081	0.401617
EMC8	-0.575221	-0.0961904	0.819397
EMC9	-0.257191	-0.203402	0.67867
EMD	-0.131239	0.24062	0.609803
EME1	-1.20263	-0.619271	1.34978
EMG1	-1.11745	-0.325539	1.20124
EMILIN2	0.813369	-0.351074	1.07909
EMILIN3	-0.708211	0.139469	0.920696
EML1	-0.940256	0.208517	1.07181
EML2	-0.493975	0.349931	0.918644
EML3	-1.00102	0.260628	1.12323
EML4	-0.119512	0.0426443	0.402686
ENAH	-0.24179	0.249749	0.701098
ENC1	1.11088	0.159629	1.12717
ENDOD1	-1.22634	-0.0724828	1.13966
ENDOG	-0.234316	-0.229382	0.680954
ENKD1	-1.00621	-0.0551416	1.03022
ENO1	-0.732882	-0.296013	1.01435
ENO2	1.51238	1.01578	1.59002
ENO3	-0.855658	1.17345	1.42447
ENOPH1	0.00327947	-0.00940813	0.112639
ENOSF1	-1.10545	-0.296899	1.18421
ENPP1	0.434978	-0.181149	0.784938
ENPP4	0.378588	0.373509	0.867235
ENSA	-0.0998403	0.092884	0.439004
ENTPD4	0.193664	0.325386	0.720451
ENY2	-0.173082	-0.172994	0.588282
EP300	0.233721	0.0193461	0.503058
EP400	-0.126502	0.124328	0.500829
EPB41L1	1.26343	1.10467	1.53886
EPB41L2	-1.45446	-0.0740006	1.23631
EPB41L3	-0.522028	0.415759	0.968394
EPB41L5	-0.597291	0.0342157	0.794674
EPB41	0.0610981	0.155102	0.464973
EPC1	0.472516	-0.0528949	0.724852
EPC2	0.697062	-0.0350469	0.855634
EPCAM	0.216843	0.405992	0.789199
EPHA2	-0.379228	-0.135269	0.717285
EPHA3	-0.897767	0.1137	1.00572
EPHA4	0.0710971	0.921817	0.996451
EPHA5	3.0086	1.3978	2.09914
EPHB2	0.0780721	0.54893	0.791835
EPHB4	-1.36725	-0.114816	1.2174
EPHX1	0.698636	0.485427	1.08815
EPHX2	-1.86341	0.255803	1.45575
EPM2AIP1	0.44141	0.306846	0.865018
EPN1	0.499163	-0.198427	0.835219
EPPK1	-0.211332	0.640621	0.923013
EPRS	0.163113	-0.179515	0.585344
EPS15L1	0.575849	0.251568	0.909624
EPS15	0.771821	-0.242977	1.00737
EPS8L2	0.736097	0.0179219	0.868343
EPS8	-1.3534	-0.403542	1.3255
EPT1	-0.239759	0.0942361	0.577923
ERAL1	-0.198434	-0.646112	0.918992
ERAP1	-0.940943	-0.0365259	0.98867
ERBB2	-0.285082	-0.132894	0.646511
ERBB4	-0.606154	-0.207561	0.902061
ERC1	0.447121	0.279174	0.85223
ERCC1	-0.0664343	-0.00505829	0.267381
ERCC2	-0.355496	0.015783	0.609326
ERCC3	-0.00367525	-0.019609	0.152592
ERCC4	0.518854	0.209765	0.853592
ERCC6L	-1.66551	-0.416962	1.44308
ERCC6	0.41992	0.0820213	0.708478
ERCC8	0.0998721
ERGIC1	0.0350922	0.491083	0.72538
ERGIC2	0.195241	-0.0402298	0.485254
ERGIC3	-0.0188145	-0.356606	0.612715
ERH	-0.576551	-0.00795672	0.764531
ERI1	-0.398884	-0.507378	0.951978
ERI3	-0.0098283	-0.0203404	0.173692
ERICH1	-0.16175	-0.183605	0.587669
ERLEC1	-0.142416	0.0517201	0.440609
ERLIN1	-1.20706	-0.223475	1.19605
ERLIN2	-0.387881	-0.0431999	0.656568
ERMP1	-1.15656	0.0881416	1.11566
ERP29	0.374189	-0.116379	0.700406
ERP44	-0.302928	0.126312	0.655164
ESCO2	-1.30515	-0.226848	1.23774
ESD	-0.272632	-0.00361125	0.525589
ESF1	-0.13179	-0.724993	0.925626
ESYT1	-0.484707	-0.0992781	0.764189
ESYT2	0.468068	0.138159	0.778606
ETAA1	-0.47505	-0.0619024	0.73277
ETF1	-0.430528	0.100305	0.728583
ETFA	-0.27505	0.190299	0.682165
ETFB	1.37192	0.333424	1.30589
ETFDH	-0.466739	0.347666	0.902444
ETHE1	-0.255233	0.140124	0.628775
ETNK1	-0.206352	0.180148	0.621691
ETV6	-0.00445618	-0.433428	0.661728
EVI5L	1.03664	0.812704	1.35991
EVI5	-0.666475	0.0356239	0.837913
EVL	0.990058	0.84318	1.35397
EWSR1	-0.441687	-0.364942	0.898126
EXD2	0.153559	0.249749	0.635065
EXOC1	0.384926	0.180784	0.752137
EXOC2	0.145069	0.406537	0.742702
EXOC3	0.242867	0.199123	0.664823
EXOC4	0.5117	0.374622	0.941447
EXOC5	0.328001	0.381283	0.84219
EXOC6B		0.222805
EXOC6	-0.666657	0.0164963	0.826531
EXOC7	-0.23297	0.100978	0.577882
EXOC8	0.522143	0.211012	0.856245
EXOG	-1.26192	0.189034	1.20455
EXOSC10	-0.426131	-0.281036	0.840932
EXOSC1	0.0486115	-0.238715	0.536028
[truncated: 5,152 more rows]
